# Supplementary material for: Systematic Analysis of Time-Series Gene Expression Data on Tumor Cell-Selective Apoptotic Responses to HDAC Inhibitors
Source: Comput Math Methods Med. 2014 Oct 13;2014:867289. doi: 10.1155/2014/867289 (PMC4211306; doi:10.1155/2014/867289)
Supplement: Supplementary file 1 — Table S1. H-score of all pathways for tumor and normal samples: This table lists the name, category, website and H-score values for all 1307 pathway. Table S2. Illustrative pathways belonging to term "No responding": This table lists the name, category, website and TVPC patterns for "No responding" pathways. Table S3. Illustrative pathways belonging to term "Consistent responding": This table lists the name, category, website and TVPC patterns for "Consistent responding" pathways. Table S4. Illustrative pathways belonging to term "Tumor specific responding": This table lists the name, category, website and TVPC patterns for "Tumor specific responding" pathways. Table S5. Illustrative pathways belonging to term "Normal specific responding": This table lists the name, category, web site and TVPC patterns for "Normal specific responding" pathways. Table S6. Illustrative pathways belonging to term "Divergent responding": This table lists the name, category, website and TVPC patterns for "Divergent responding" pathways. Table S7. Genes within profile #0 for normal samples: This table contains all genes within profile #0 for normal samples, and lists the normalized expression data to the right of gene symbol. Table S8. Genes within profile #2 for normal samples: This table contains all genes within profile #2 for normal samples, and lists the normalized expression data to the right of gene symbol. Table S9. Genes within profile #9 for normal samples: This table contains all genes within profile #9 for normal samples, and lists the normalized expression data to the right of gene symbol. Table S10. Genes within profile #12 for normal samples: This table contains all genes within profile # 12 for normal samples, and lists the normalized expression data to the right of gene symbol. Table S11. Genes within profile #14 for normal samples: This table contains all genes within profile #14 for normal samples, and lists the normalized expression data to the right of gene symbol. Ta [file 867289.f1.zip]

Archive with 20 entries (19 files):
- 867289.f1/
- 867289.f1/Table S1.xls
- 867289.f1/Table S10.xls
- 867289.f1/Table S11.xls
- 867289.f1/Table S12.xls
- 867289.f1/Table S13.xls
- 867289.f1/Table S14.xls
- 867289.f1/Table S15.xls
- 867289.f1/Table S16.xls
- 867289.f1/Table S17.xls
- 867289.f1/Table S18.xls
- 867289.f1/Table S19.xls
- 867289.f1/Table S2.xls
- 867289.f1/Table S3.xls
- 867289.f1/Table S4.xls
- 867289.f1/Table S5.xls
- 867289.f1/Table S6.xls
- 867289.f1/Table S7.xls
- 867289.f1/Table S8.xls
- 867289.f1/Table S9.xls
