# Supplementary material for: Systematic Analysis of Time-Series Gene Expression Data on Tumor Cell-Selective Apoptotic Responses to HDAC Inhibitors
Source: Comput Math Methods Med. 2014 Oct 13;2014:867289. doi: 10.1155/2014/867289 (PMC4211306; doi:10.1155/2014/867289)
Supplement: Supplementary file 1 — Table S1. H-score of all pathways for tumor and normal samples: This table lists the name, category, website and H-score values for all 1307 pathway. Table S2. Illustrative pathways belonging to term "No responding": This table lists the name, category, website and TVPC patterns for "No responding" pathways. Table S3. Illustrative pathways belonging to term "Consistent responding": This table lists the name, category, website and TVPC patterns for "Consistent responding" pathways. Table S4. Illustrative pathways belonging to term "Tumor specific responding": This table lists the name, category, website and TVPC patterns for "Tumor specific responding" pathways. Table S5. Illustrative pathways belonging to term "Normal specific responding": This table lists the name, category, web site and TVPC patterns for "Normal specific responding" pathways. Table S6. Illustrative pathways belonging to term "Divergent responding": This table lists the name, category, website and TVPC patterns for "Divergent responding" pathways. Table S7. Genes within profile #0 for normal samples: This table contains all genes within profile #0 for normal samples, and lists the normalized expression data to the right of gene symbol. Table S8. Genes within profile #2 for normal samples: This table contains all genes within profile #2 for normal samples, and lists the normalized expression data to the right of gene symbol. Table S9. Genes within profile #9 for normal samples: This table contains all genes within profile #9 for normal samples, and lists the normalized expression data to the right of gene symbol. Table S10. Genes within profile #12 for normal samples: This table contains all genes within profile # 12 for normal samples, and lists the normalized expression data to the right of gene symbol. Table S11. Genes within profile #14 for normal samples: This table contains all genes within profile #14 for normal samples, and lists the normalized expression data to the right of gene symbol. Ta [file 867289.f1.zip › 867289.f1/Table S1.xls]

## Sheet: Sheet1
Pathway name	Categories	NO.all	NO.in	Web site	Hscore-tumor	Hscore-normal	OMIC gene counts
KEGG RIBOSOME	Genetic Information Processing	88	79	http://www.broadinstitute.org/gsea/msigdb/cards/KEGG_RIBOSOME	1969.9	2938.8	3
GO MITOCHONDRION	Cellular component	343	311	http://www.broadinstitute.org/gsea/msigdb/cards/MITOCHONDRION	1387.7	423.66	8
GO STRUCTURAL CONSTITUENT OF RIBOSOME	Molecular function	80	75	http://www.broadinstitute.org/gsea/msigdb/cards/STRUCTURAL_CONSTITUENT_OF_RIBOSOME	1385.1	2040.7	2
KEGG OXIDATIVE PHOSPHORYLATION	Metabolism	135	110	http://www.broadinstitute.org/gsea/msigdb/cards/KEGG_OXIDATIVE_PHOSPHORYLATION	1374	790.8	4
GO NUCLEAR PART	Cellular component	579	487	http://www.broadinstitute.org/gsea/msigdb/cards/NUCLEAR_PART	1091	314.25	49
GO RNA BINDING	Molecular function	259	213	http://www.broadinstitute.org/gsea/msigdb/cards/RNA_BINDING	1011	830.91	7
KEGG HUNTINGTONS DISEASE	Human Diseases	185	164	http://www.broadinstitute.org/gsea/msigdb/cards/KEGG_HUNTINGTONS_DISEASE	963.69	339.77	15
KEGG OLFACTORY TRANSDUCTION	Organismal Systems	389	114	http://www.broadinstitute.org/gsea/msigdb/cards/KEGG_OLFACTORY_TRANSDUCTION	839.33	-9.5187	0
KEGG PARKINSONS DISEASE	Human Diseases	133	106	http://www.broadinstitute.org/gsea/msigdb/cards/KEGG_PARKINSONS_DISEASE	821.29	471.44	4
GO ORGANELLE LUMEN	Cellular component	458	391	http://www.broadinstitute.org/gsea/msigdb/cards/ORGANELLE_LUMEN	621.38	39.824	35
GO MEMBRANE ENCLOSED LUMEN	Cellular component	458	391	http://www.broadinstitute.org/gsea/msigdb/cards/MEMBRANE_ENCLOSED_LUMEN	621.38	39.824	35
GO MITOCHONDRIAL PART	Cellular component	142	137	http://www.broadinstitute.org/gsea/msigdb/cards/MITOCHONDRIAL_PART	469.6	276.79	3
GO NUCLEAR LUMEN	Cellular component	387	325	http://www.broadinstitute.org/gsea/msigdb/cards/NUCLEAR_LUMEN	450.34	50.709	35
KEGG PEROXISOME	Cellular Processes	78	72	http://www.broadinstitute.org/gsea/msigdb/cards/KEGG_PEROXISOME	419.23	39.635	3
KEGG ENDOCYTOSIS	Cellular Processes	183	157	http://www.broadinstitute.org/gsea/msigdb/cards/KEGG_ENDOCYTOSIS	331.09	10.923	20
KEGG NEUROACTIVE LIGAND RECEPTOR INTERACTION	Environmental Information Processing	272	252	http://www.broadinstitute.org/gsea/msigdb/cards/KEGG_NEUROACTIVE_LIGAND_RECEPTOR_INTERACTION	330.33	-26.686	2
GO MITOTIC CELL CYCLE	Biological process	153	136	http://www.broadinstitute.org/gsea/msigdb/cards/MITOTIC_CELL_CYCLE	314.14	864.99	10
GO RIBONUCLEOPROTEIN COMPLEX	Cellular component	143	119	http://www.broadinstitute.org/gsea/msigdb/cards/RIBONUCLEOPROTEIN_COMPLEX	290.1	202.7	5
GO NUCLEOPLASM	Cellular component	279	238	http://www.broadinstitute.org/gsea/msigdb/cards/NUCLEOPLASM	262.1	10.826	31
GO RNA PROCESSING	Biological process	173	133	http://www.broadinstitute.org/gsea/msigdb/cards/RNA_PROCESSING	247.37	32.819	4
GO GTPASE ACTIVITY	Molecular function	99	88	http://www.broadinstitute.org/gsea/msigdb/cards/GTPASE_ACTIVITY	212.55	12.051	4
GO G PROTEIN COUPLED RECEPTOR PROTEIN SIGNALING PATHWAY	Biological process	342	308	http://www.broadinstitute.org/gsea/msigdb/cards/G_PROTEIN_COUPLED_RECEPTOR_PROTEIN_SIGNALING_PATHWAY	201.15	-2.9046	6
GO CELL CYCLE PROCESS	Biological process	193	172	http://www.broadinstitute.org/gsea/msigdb/cards/CELL_CYCLE_PROCESS	198.53	919.47	14
KEGG CYTOKINE CYTOKINE RECEPTOR INTERACTION	Environmental Information Processing	267	245	http://www.broadinstitute.org/gsea/msigdb/cards/KEGG_CYTOKINE_CYTOKINE_RECEPTOR_INTERACTION	196.52	2.7386	18
GO MITOCHONDRIAL INNER MEMBRANE	Cellular component	67	64	http://www.broadinstitute.org/gsea/msigdb/cards/MITOCHONDRIAL_INNER_MEMBRANE	190.59	112.56	1
GO G PROTEIN COUPLED RECEPTOR ACTIVITY	Molecular function	191	177	http://www.broadinstitute.org/gsea/msigdb/cards/G_PROTEIN_COUPLED_RECEPTOR_ACTIVITY	187.24	-13.295	3
GO REGULATION OF TRANSCRIPTION	Biological process	566	497	http://www.broadinstitute.org/gsea/msigdb/cards/REGULATION_OF_TRANSCRIPTION	182.36	419.38	61
KEGG CITRATE CYCLE TCA CYCLE	Metabolism	32	29	http://www.broadinstitute.org/gsea/msigdb/cards/KEGG_CITRATE_CYCLE_TCA_CYCLE	176.42	57.689	6
GO MITOCHONDRIAL ENVELOPE	Cellular component	97	92	http://www.broadinstitute.org/gsea/msigdb/cards/MITOCHONDRIAL_ENVELOPE	174.4	56.596	3
KEGG ECM RECEPTOR INTERACTION	Environmental Information Processing	84	81	http://www.broadinstitute.org/gsea/msigdb/cards/KEGG_ECM_RECEPTOR_INTERACTION	167.09	105.65	2
GO MICROBODY	Cellular component	47	44	http://www.broadinstitute.org/gsea/msigdb/cards/MICROBODY	167.06	11.175	0
GO PEROXISOME	Cellular component	47	44	http://www.broadinstitute.org/gsea/msigdb/cards/PEROXISOME	167.06	11.175	0
GO CELL CYCLE GO 0007049	Biological process	315	285	http://www.broadinstitute.org/gsea/msigdb/cards/CELL_CYCLE_GO_0007049	164.99	486.09	30
GO TRANSLATION	Biological process	180	154	http://www.broadinstitute.org/gsea/msigdb/cards/TRANSLATION	161.97	375.4	8
KEGG SYSTEMIC LUPUS ERYTHEMATOSUS	Human Diseases	140	107	http://www.broadinstitute.org/gsea/msigdb/cards/KEGG_SYSTEMIC_LUPUS_ERYTHEMATOSUS	160.39	26.35	4
KEGG VALINE LEUCINE AND ISOLEUCINE DEGRADATION	Metabolism	44	43	http://www.broadinstitute.org/gsea/msigdb/cards/KEGG_VALINE_LEUCINE_AND_ISOLEUCINE_DEGRADATION	158.74	81.908	1
GO TRANSMEMBRANE RECEPTOR ACTIVITY	Molecular function	418	394	http://www.broadinstitute.org/gsea/msigdb/cards/TRANSMEMBRANE_RECEPTOR_ACTIVITY	155.42	0.27085	16
GO POSITIVE REGULATION OF CELLULAR METABOLIC PROCESS	Biological process	229	197	http://www.broadinstitute.org/gsea/msigdb/cards/POSITIVE_REGULATION_OF_CELLULAR_METABOLIC_PROCESS	155.22	21.87	23
GO MITOCHONDRIAL MEMBRANE	Cellular component	86	82	http://www.broadinstitute.org/gsea/msigdb/cards/MITOCHONDRIAL_MEMBRANE	148.9	77.404	3
KEGG FOCAL ADHESION	Cellular Processes	201	188	http://www.broadinstitute.org/gsea/msigdb/cards/KEGG_FOCAL_ADHESION	140.11	26.13	25
GO MITOCHONDRIAL MEMBRANE PART	Cellular component	53	51	http://www.broadinstitute.org/gsea/msigdb/cards/MITOCHONDRIAL_MEMBRANE_PART	135.72	75.186	0
GO CELL CELL SIGNALING	Biological process	404	388	http://www.broadinstitute.org/gsea/msigdb/cards/CELL_CELL_SIGNALING	135.09	-0.82952	5
GO RIBOSOME	Cellular component	39	39	http://www.broadinstitute.org/gsea/msigdb/cards/RIBOSOME	134.8	98.825	0
GO OXIDOREDUCTASE ACTIVITY	Molecular function	289	269	http://www.broadinstitute.org/gsea/msigdb/cards/OXIDOREDUCTASE_ACTIVITY	132.07	5.4706	3
GO NUCLEOLUS	Cellular component	126	104	http://www.broadinstitute.org/gsea/msigdb/cards/NUCLEOLUS	131.3	101.68	9
KEGG SPLICEOSOME	Genetic Information Processing	128	96	http://www.broadinstitute.org/gsea/msigdb/cards/KEGG_SPLICEOSOME	130.21	60.632	4
GO POSITIVE REGULATION OF METABOLIC PROCESS	Biological process	236	204	http://www.broadinstitute.org/gsea/msigdb/cards/POSITIVE_REGULATION_OF_METABOLIC_PROCESS	125.6	16.931	23
GO POSITIVE REGULATION OF NUCLEOBASENUCLEOSIDENUCLEOTIDE AND NUCLEIC ACID METABOLIC PROCESS	Biological process	154	129	http://www.broadinstitute.org/gsea/msigdb/cards/POSITIVE_REGULATION_OF_NUCLEOBASENUCLEOSIDENUCLEOTIDE_AND_NUCLEIC_ACID_METABOLIC_PROCESS	120.71	89.562	18
GO REGULATION OF RNA METABOLIC PROCESS	Biological process	471	411	http://www.broadinstitute.org/gsea/msigdb/cards/REGULATION_OF_RNA_METABOLIC_PROCESS	119.49	276.82	52
KEGG PROPANOATE METABOLISM	Metabolism	33	31	http://www.broadinstitute.org/gsea/msigdb/cards/KEGG_PROPANOATE_METABOLISM	118.84	15.735	1
KEGG ALZHEIMERS DISEASE	Human Diseases	169	149	http://www.broadinstitute.org/gsea/msigdb/cards/KEGG_ALZHEIMERS_DISEASE	115.04	100.79	5
GO CELL CYCLE PHASE	Biological process	170	153	http://www.broadinstitute.org/gsea/msigdb/cards/CELL_CYCLE_PHASE	113.46	615.58	11
GO REGULATION OF TRANSCRIPTIONDNA DEPENDENT	Biological process	461	406	http://www.broadinstitute.org/gsea/msigdb/cards/REGULATION_OF_TRANSCRIPTIONDNA_DEPENDENT	109.98	280.18	52
GO RECEPTOR BINDING	Molecular function	377	347	http://www.broadinstitute.org/gsea/msigdb/cards/RECEPTOR_BINDING	109.15	6.6904	15
GO NUCLEOPLASM PART	Cellular component	211	181	http://www.broadinstitute.org/gsea/msigdb/cards/NUCLEOPLASM_PART	108.32	1.9513	20
GO RHODOPSIN LIKE RECEPTOR ACTIVITY	Molecular function	134	125	http://www.broadinstitute.org/gsea/msigdb/cards/RHODOPSIN_LIKE_RECEPTOR_ACTIVITY	108.12	-8.8596	3
GO STRUCTURAL MOLECULE ACTIVITY	Molecular function	244	226	http://www.broadinstitute.org/gsea/msigdb/cards/STRUCTURAL_MOLECULE_ACTIVITY	107.37	136.31	8
KEGG PYRUVATE METABOLISM	Metabolism	40	40	http://www.broadinstitute.org/gsea/msigdb/cards/KEGG_PYRUVATE_METABOLISM	106.47	13.42	1
GO ORGANELLE INNER MEMBRANE	Cellular component	75	72	http://www.broadinstitute.org/gsea/msigdb/cards/ORGANELLE_INNER_MEMBRANE	105.03	65.065	1
GO DNA METABOLIC PROCESS	Biological process	257	232	http://www.broadinstitute.org/gsea/msigdb/cards/DNA_METABOLIC_PROCESS	104.79	572.88	33
KEGG INSULIN SIGNALING PATHWAY	Organismal Systems	137	131	http://www.broadinstitute.org/gsea/msigdb/cards/KEGG_INSULIN_SIGNALING_PATHWAY	102.81	0.76632	18
GO HEMATOPOIETIN INTERFERON CLASSD200 DOMAIN CYTOKINE RECEPTOR BINDING	Molecular function	29	28	http://www.broadinstitute.org/gsea/msigdb/cards/HEMATOPOIETIN_INTERFERON_CLASSD200_DOMAIN_CYTOKINE_RECEPTOR_BINDING	94.798	-0.87353	1
GO DEFENSE RESPONSE	Biological process	270	242	http://www.broadinstitute.org/gsea/msigdb/cards/DEFENSE_RESPONSE	94.46	-12.796	7
GO CELL PROLIFERATION GO 0008283	Biological process	513	474	http://www.broadinstitute.org/gsea/msigdb/cards/CELL_PROLIFERATION_GO_0008283	94.323	242.05	46
GO TRANSCRIPTION ACTIVATOR ACTIVITY	Molecular function	173	151	http://www.broadinstitute.org/gsea/msigdb/cards/TRANSCRIPTION_ACTIVATOR_ACTIVITY	93.966	138.43	26
GO ORGANIC ACID METABOLIC PROCESS	Biological process	180	168	http://www.broadinstitute.org/gsea/msigdb/cards/ORGANIC_ACID_METABOLIC_PROCESS	85.375	4.428	4
GO HORMONE RECEPTOR BINDING	Molecular function	29	21	http://www.broadinstitute.org/gsea/msigdb/cards/HORMONE_RECEPTOR_BINDING	85.15	70.241	5
KEGG FATTY ACID METABOLISM	Metabolism	42	39	http://www.broadinstitute.org/gsea/msigdb/cards/KEGG_FATTY_ACID_METABOLISM	84.9	1.4702	2
GO POSITIVE REGULATION OF TRANSCRIPTION	Biological process	144	119	http://www.broadinstitute.org/gsea/msigdb/cards/POSITIVE_REGULATION_OF_TRANSCRIPTION	84.057	93.18	18
GO POSITIVE REGULATION OF RNA METABOLIC PROCESS	Biological process	120	101	http://www.broadinstitute.org/gsea/msigdb/cards/POSITIVE_REGULATION_OF_RNA_METABOLIC_PROCESS	84.013	55.272	14
GO DNA DIRECTED RNA POLYMERASEII HOLOENZYME	Cellular component	67	54	http://www.broadinstitute.org/gsea/msigdb/cards/DNA_DIRECTED_RNA_POLYMERASEII_HOLOENZYME	83.68	18.743	5
GO CHROMOSOME	Cellular component	124	114	http://www.broadinstitute.org/gsea/msigdb/cards/CHROMOSOME	82.727	384.07	12
GO CELLULAR BIOSYNTHETIC PROCESS	Biological process	321	287	http://www.broadinstitute.org/gsea/msigdb/cards/CELLULAR_BIOSYNTHETIC_PROCESS	81.712	37.187	14
GO ENDOPLASMIC RETICULUM PART	Cellular component	97	83	http://www.broadinstitute.org/gsea/msigdb/cards/ENDOPLASMIC_RETICULUM_PART	78.615	-0.11132	5
GO POSITIVE REGULATION OF TRANSCRIPTIONDNA DEPENDENT	Biological process	118	99	http://www.broadinstitute.org/gsea/msigdb/cards/POSITIVE_REGULATION_OF_TRANSCRIPTIONDNA_DEPENDENT	78.37	59.255	14
GO POSITIVE REGULATION OF I KAPPAB KINASE NF KAPPAB CASCADE	Biological process	87	79	http://www.broadinstitute.org/gsea/msigdb/cards/POSITIVE_REGULATION_OF_I_KAPPAB_KINASE_NF_KAPPAB_CASCADE	73.677	68.667	6
GO MITOCHONDRIAL MATRIX	Cellular component	46	46	http://www.broadinstitute.org/gsea/msigdb/cards/MITOCHONDRIAL_MATRIX	72.879	144.86	0
GO MITOCHONDRIAL LUMEN	Cellular component	46	46	http://www.broadinstitute.org/gsea/msigdb/cards/MITOCHONDRIAL_LUMEN	72.879	144.86	0
KEGG N GLYCAN BIOSYNTHESIS	Metabolism	46	42	http://www.broadinstitute.org/gsea/msigdb/cards/KEGG_N_GLYCAN_BIOSYNTHESIS	72.693	1.1154	1
GO OXIDOREDUCTASE ACTIVITY ACTING ON THE CH CH GROUP OF DONORS	Molecular function	23	23	http://www.broadinstitute.org/gsea/msigdb/cards/OXIDOREDUCTASE_ACTIVITY_ACTING_ON_THE_CH_CH_GROUP_OF_DONORS	71.317	0.087818	1
GO TRANSFERASE ACTIVITY TRANSFERRING PHOSPHORUS CONTAINING GROUPS	Molecular function	424	396	http://www.broadinstitute.org/gsea/msigdb/cards/TRANSFERASE_ACTIVITY_TRANSFERRING_PHOSPHORUS_CONTAINING_GROUPS	71.195	18.024	24
BIOCARTA PROTEASOME PATHWAY	Adhesion – Metabolism	28	26	http://www.broadinstitute.org/gsea/msigdb/cards/BIOCARTA_PROTEASOME_PATHWAY	69.692	9.5553	1
GO LYASE ACTIVITY	Molecular function	69	67	http://www.broadinstitute.org/gsea/msigdb/cards/LYASE_ACTIVITY	69.405	99.713	1
KEGG CELL CYCLE	Organismal Systems	128	113	http://www.broadinstitute.org/gsea/msigdb/cards/KEGG_CELL_CYCLE	69.084	321.68	19
KEGG PROTEASOME	Genetic Information Processing	48	42	http://www.broadinstitute.org/gsea/msigdb/cards/KEGG_PROTEASOME	68.898	5.3361	0
GO CARBOXYLIC ACID METABOLIC PROCESS	Biological process	178	166	http://www.broadinstitute.org/gsea/msigdb/cards/CARBOXYLIC_ACID_METABOLIC_PROCESS	68.581	5.299	4
GO NUCLEAR HORMONE RECEPTOR BINDING	Molecular function	28	20	http://www.broadinstitute.org/gsea/msigdb/cards/NUCLEAR_HORMONE_RECEPTOR_BINDING	67.47	55.962	5
GO DNA REPAIR	Biological process	125	117	http://www.broadinstitute.org/gsea/msigdb/cards/DNA_REPAIR	65.299	113.31	23
KEGG DNA REPLICATION	Genetic Information Processing	36	34	http://www.broadinstitute.org/gsea/msigdb/cards/KEGG_DNA_REPLICATION	62.79	447.4	0
GO ENDOPLASMIC RETICULUM	Cellular component	294	258	http://www.broadinstitute.org/gsea/msigdb/cards/ENDOPLASMIC_RETICULUM	62.376	0.16992	7
GO ORGANELLE ORGANIZATION AND BIOGENESIS	Biological process	473	424	http://www.broadinstitute.org/gsea/msigdb/cards/ORGANELLE_ORGANIZATION_AND_BIOGENESIS	61.15	44.817	37
GO REGULATION OF CELL PROLIFERATION	Biological process	308	280	http://www.broadinstitute.org/gsea/msigdb/cards/REGULATION_OF_CELL_PROLIFERATION	59.667	52.804	26
KEGG SMALL CELL LUNG CANCER	Human Diseases	84	82	http://www.broadinstitute.org/gsea/msigdb/cards/KEGG_SMALL_CELL_LUNG_CANCER	58.48	24.784	16
GO SECOND MESSENGER MEDIATED SIGNALING	Biological process	153	145	http://www.broadinstitute.org/gsea/msigdb/cards/SECOND_MESSENGER_MEDIATED_SIGNALING	56.626	-1.6377	5
KEGG RNA DEGRADATION	Genetic Information Processing	59	51	http://www.broadinstitute.org/gsea/msigdb/cards/KEGG_RNA_DEGRADATION	55.157	6.5412	2
GO TRANSCRIPTION FROM RNA POLYMERASE II PROMOTER	Biological process	457	414	http://www.broadinstitute.org/gsea/msigdb/cards/TRANSCRIPTION_FROM_RNA_POLYMERASE_II_PROMOTER	54.215	52.28	55
GO PROTON TRANSPORTING TWO SECTOR ATPASE COMPLEX	Cellular component	15	15	http://www.broadinstitute.org/gsea/msigdb/cards/PROTON_TRANSPORTING_TWO_SECTOR_ATPASE_COMPLEX	53.699	48.963	0
GO CYTOKINE ACTIVITY	Molecular function	113	104	http://www.broadinstitute.org/gsea/msigdb/cards/CYTOKINE_ACTIVITY	53.14	-0.16879	3
GO ORGANELLAR RIBOSOME	Cellular component	22	22	http://www.broadinstitute.org/gsea/msigdb/cards/ORGANELLAR_RIBOSOME	53.09	78.634	0
GO MITOCHONDRIAL RIBOSOME	Cellular component	22	22	http://www.broadinstitute.org/gsea/msigdb/cards/MITOCHONDRIAL_RIBOSOME	53.09	78.634	0
GO EXTRACELLULAR REGION	Cellular component	447	415	http://www.broadinstitute.org/gsea/msigdb/cards/EXTRACELLULAR_REGION	53.011	0.28908	4
GO PHOSPHOTRANSFERASE ACTIVITY ALCOHOL GROUP AS ACCEPTOR	Molecular function	334	313	http://www.broadinstitute.org/gsea/msigdb/cards/PHOSPHOTRANSFERASE_ACTIVITY_ALCOHOL_GROUP_AS_ACCEPTOR	52.969	12.494	23
GO MACROMOLECULE BIOSYNTHETIC PROCESS	Biological process	321	286	http://www.broadinstitute.org/gsea/msigdb/cards/MACROMOLECULE_BIOSYNTHETIC_PROCESS	52.773	82.324	12
GO ENVELOPE	Cellular component	169	158	http://www.broadinstitute.org/gsea/msigdb/cards/ENVELOPE	52.733	21.307	8
GO ORGANELLE ENVELOPE	Cellular component	169	158	http://www.broadinstitute.org/gsea/msigdb/cards/ORGANELLE_ENVELOPE	52.733	21.307	8
GO TRANSCRIPTION COFACTOR ACTIVITY	Molecular function	228	200	http://www.broadinstitute.org/gsea/msigdb/cards/TRANSCRIPTION_COFACTOR_ACTIVITY	52.732	118.92	25
GO REGULATION OF I KAPPAB KINASE NF KAPPAB CASCADE	Biological process	93	84	http://www.broadinstitute.org/gsea/msigdb/cards/REGULATION_OF_I_KAPPAB_KINASE_NF_KAPPAB_CASCADE	52.372	60.422	7
GO RESPONSE TO EXTERNAL STIMULUS	Biological process	312	287	http://www.broadinstitute.org/gsea/msigdb/cards/RESPONSE_TO_EXTERNAL_STIMULUS	51.829	-0.066319	10
GO KINASE ACTIVITY	Molecular function	369	345	http://www.broadinstitute.org/gsea/msigdb/cards/KINASE_ACTIVITY	50.842	12.334	23
GO CELLULAR COMPONENT ASSEMBLY	Biological process	298	253	http://www.broadinstitute.org/gsea/msigdb/cards/CELLULAR_COMPONENT_ASSEMBLY	48.672	-0.092464	27
GO COFACTOR METABOLIC PROCESS	Biological process	54	49	http://www.broadinstitute.org/gsea/msigdb/cards/COFACTOR_METABOLIC_PROCESS	47.406	6.9505	3
GO CHROMOSOMAL PART	Cellular component	96	88	http://www.broadinstitute.org/gsea/msigdb/cards/CHROMOSOMAL_PART	47.389	370.2	9
GO I KAPPAB KINASE NF KAPPAB CASCADE	Biological process	114	104	http://www.broadinstitute.org/gsea/msigdb/cards/I_KAPPAB_KINASE_NF_KAPPAB_CASCADE	46.8	18.568	8
GO IMMUNE SYSTEM PROCESS	Biological process	332	309	http://www.broadinstitute.org/gsea/msigdb/cards/IMMUNE_SYSTEM_PROCESS	44.94	-0.11518	28
GO GENERATION OF PRECURSOR METABOLITES AND ENERGY	Biological process	123	119	http://www.broadinstitute.org/gsea/msigdb/cards/GENERATION_OF_PRECURSOR_METABOLITES_AND_ENERGY	44.444	1.7242	5
KEGG UBIQUITIN MEDIATED PROTEOLYSIS	Genetic Information Processing	138	122	http://www.broadinstitute.org/gsea/msigdb/cards/KEGG_UBIQUITIN_MEDIATED_PROTEOLYSIS	43.821	1.1916	11
GO ACTIN CYTOSKELETON	Cellular component	129	121	http://www.broadinstitute.org/gsea/msigdb/cards/ACTIN_CYTOSKELETON	43.454	0.076924	8
GO MACROMOLECULAR COMPLEX ASSEMBLY	Biological process	280	236	http://www.broadinstitute.org/gsea/msigdb/cards/MACROMOLECULAR_COMPLEX_ASSEMBLY	42.673	-0.016348	26
GO M PHASE OF MITOTIC CELL CYCLE	Biological process	85	77	http://www.broadinstitute.org/gsea/msigdb/cards/M_PHASE_OF_MITOTIC_CELL_CYCLE	42.21	185.38	5
KEGG BASE EXCISION REPAIR	Genetic Information Processing	35	33	http://www.broadinstitute.org/gsea/msigdb/cards/KEGG_BASE_EXCISION_REPAIR	41.921	100.37	1
GO RNA SPLICING	Biological process	91	66	http://www.broadinstitute.org/gsea/msigdb/cards/RNA_SPLICING	41.865	21.213	4
GO PROTEIN KINASE ACTIVITY	Molecular function	285	270	http://www.broadinstitute.org/gsea/msigdb/cards/PROTEIN_KINASE_ACTIVITY	41.253	11.057	22
GO MEMBRANE FRACTION	Cellular component	339	321	http://www.broadinstitute.org/gsea/msigdb/cards/MEMBRANE_FRACTION	40.806	0.9348	6
KEGG FC GAMMA R MEDIATED PHAGOCYTOSIS	Organismal Systems	97	87	http://www.broadinstitute.org/gsea/msigdb/cards/KEGG_FC_GAMMA_R_MEDIATED_PHAGOCYTOSIS	40.639	10.232	11
KEGG PYRIMIDINE METABOLISM	Metabolism	98	88	http://www.broadinstitute.org/gsea/msigdb/cards/KEGG_PYRIMIDINE_METABOLISM	40.439	69.918	2
GO NEUROLOGICAL SYSTEM PROCESS	Biological process	379	359	http://www.broadinstitute.org/gsea/msigdb/cards/NEUROLOGICAL_SYSTEM_PROCESS	40.207	-0.3354	4
GO NEUROTRANSMITTER BINDING	Molecular function	53	52	http://www.broadinstitute.org/gsea/msigdb/cards/NEUROTRANSMITTER_BINDING	39.667	-1.6565	0
GO RESPONSE TO DNA DAMAGE STIMULUS	Biological process	162	148	http://www.broadinstitute.org/gsea/msigdb/cards/RESPONSE_TO_DNA_DAMAGE_STIMULUS	39.543	142.18	29
KEGG NEUROTROPHIN SIGNALING PATHWAY	Organismal Systems	126	122	http://www.broadinstitute.org/gsea/msigdb/cards/KEGG_NEUROTROPHIN_SIGNALING_PATHWAY	39.446	1.0087	21
KEGG RETINOL METABOLISM	Metabolism	64	49	http://www.broadinstitute.org/gsea/msigdb/cards/KEGG_RETINOL_METABOLISM	39.076	-5.493	0
GO RIBOSOMAL SUBUNIT	Cellular component	20	20	http://www.broadinstitute.org/gsea/msigdb/cards/RIBOSOMAL_SUBUNIT	39.049	49.534	0
KEGG COMPLEMENT AND COAGULATION CASCADES	Organismal Systems	69	66	http://www.broadinstitute.org/gsea/msigdb/cards/KEGG_COMPLEMENT_AND_COAGULATION_CASCADES	38.838	-1.5582	0
GO IMMUNE RESPONSE	Biological process	235	221	http://www.broadinstitute.org/gsea/msigdb/cards/IMMUNE_RESPONSE	38.738	-1.1642	17
GO BIOSYNTHETIC PROCESS	Biological process	470	422	http://www.broadinstitute.org/gsea/msigdb/cards/BIOSYNTHETIC_PROCESS	38.371	13.712	17
GO POSITIVE REGULATION OF IMMUNE SYSTEM PROCESS	Biological process	51	50	http://www.broadinstitute.org/gsea/msigdb/cards/POSITIVE_REGULATION_OF_IMMUNE_SYSTEM_PROCESS	38.082	-0.0022402	3
GO REGULATION OF IMMUNE RESPONSE	Biological process	33	32	http://www.broadinstitute.org/gsea/msigdb/cards/REGULATION_OF_IMMUNE_RESPONSE	35.994	-0.52625	2
GO MITOSIS	Biological process	82	75	http://www.broadinstitute.org/gsea/msigdb/cards/MITOSIS	35.945	182.38	5
GO TRANSCRIPTION COACTIVATOR ACTIVITY	Molecular function	123	111	http://www.broadinstitute.org/gsea/msigdb/cards/TRANSCRIPTION_COACTIVATOR_ACTIVITY	35.196	51.09	15
KEGG GLYCINE SERINE AND THREONINE METABOLISM	Metabolism	31	31	http://www.broadinstitute.org/gsea/msigdb/cards/KEGG_GLYCINE_SERINE_AND_THREONINE_METABOLISM	34.983	-0.6298	0
GO HELICASE ACTIVITY	Molecular function	51	45	http://www.broadinstitute.org/gsea/msigdb/cards/HELICASE_ACTIVITY	34.54	3.5001	8
GO CYTOKINE BINDING	Molecular function	48	46	http://www.broadinstitute.org/gsea/msigdb/cards/CYTOKINE_BINDING	34.478	0.69249	4
GO POSITIVE REGULATION OF SIGNAL TRANSDUCTION	Biological process	126	113	http://www.broadinstitute.org/gsea/msigdb/cards/POSITIVE_REGULATION_OF_SIGNAL_TRANSDUCTION	34.439	20.045	9
GO RESPONSE TO BACTERIUM	Biological process	31	26	http://www.broadinstitute.org/gsea/msigdb/cards/RESPONSE_TO_BACTERIUM	33.735	-0.33641	1
GO POSITIVE REGULATION OF IMMUNE RESPONSE	Biological process	29	28	http://www.broadinstitute.org/gsea/msigdb/cards/POSITIVE_REGULATION_OF_IMMUNE_RESPONSE	33.695	-0.50547	2
GO NUCLEAR TRANSPORT	Biological process	88	77	http://www.broadinstitute.org/gsea/msigdb/cards/NUCLEAR_TRANSPORT	33.373	0.16612	12
GO POSITIVE REGULATION OF CELL PROLIFERATION	Biological process	149	132	http://www.broadinstitute.org/gsea/msigdb/cards/POSITIVE_REGULATION_OF_CELL_PROLIFERATION	32.944	33.858	9
KEGG PATHWAYS IN CANCER	Human Diseases	328	315	http://www.broadinstitute.org/gsea/msigdb/cards/KEGG_PATHWAYS_IN_CANCER	32.706	5.7299	76
GO NUCLEOCYTOPLASMIC TRANSPORT	Biological process	87	76	http://www.broadinstitute.org/gsea/msigdb/cards/NUCLEOCYTOPLASMIC_TRANSPORT	32.591	0.11909	12
KEGG BUTANOATE METABOLISM	Metabolism	34	31	http://www.broadinstitute.org/gsea/msigdb/cards/KEGG_BUTANOATE_METABOLISM	32.558	6.6504	1
GO CELLULAR CATABOLIC PROCESS	Biological process	212	195	http://www.broadinstitute.org/gsea/msigdb/cards/CELLULAR_CATABOLIC_PROCESS	32.027	4.3011	9
GO MITOCHONDRION ORGANIZATION AND BIOGENESIS	Biological process	48	45	http://www.broadinstitute.org/gsea/msigdb/cards/MITOCHONDRION_ORGANIZATION_AND_BIOGENESIS	31.213	9.846	3
GO CHROMATIN BINDING	Molecular function	32	31	http://www.broadinstitute.org/gsea/msigdb/cards/CHROMATIN_BINDING	31.077	102.68	5
GO CELLULAR LIPID METABOLIC PROCESS	Biological process	255	226	http://www.broadinstitute.org/gsea/msigdb/cards/CELLULAR_LIPID_METABOLIC_PROCESS	30.353	16.956	4
GO TRANSFERASE ACTIVITY TRANSFERRING HEXOSYL GROUPS	Molecular function	81	75	http://www.broadinstitute.org/gsea/msigdb/cards/TRANSFERASE_ACTIVITY_TRANSFERRING_HEXOSYL_GROUPS	30.345	-0.088762	2
BIOCARTA NKT PATHWAY	Cell Activation - Cell Signaling – Cytokines/Chemokines -Hematopoiesis -Immunology	29	27	http://www.broadinstitute.org/gsea/msigdb/cards/BIOCARTA_NKT_PATHWAY	30.261	0.24294	1
GO INTERPHASE	Biological process	68	62	http://www.broadinstitute.org/gsea/msigdb/cards/INTERPHASE	30.202	153.79	6
GO COENZYME METABOLIC PROCESS	Biological process	38	35	http://www.broadinstitute.org/gsea/msigdb/cards/COENZYME_METABOLIC_PROCESS	29.948	3.3	3
GO ELECTRON CARRIER ACTIVITY	Molecular function	78	74	http://www.broadinstitute.org/gsea/msigdb/cards/ELECTRON_CARRIER_ACTIVITY	29.62	0.94689	2
KEGG SNARE INTERACTIONS IN VESICULAR TRANSPORT	Genetic Information Processing	38	34	http://www.broadinstitute.org/gsea/msigdb/cards/KEGG_SNARE_INTERACTIONS_IN_VESICULAR_TRANSPORT	29.435	2.3331	1
GO PORE COMPLEX	Cellular component	36	32	http://www.broadinstitute.org/gsea/msigdb/cards/PORE_COMPLEX	29.231	4.1834	3
GO ENDOPLASMIC RETICULUM MEMBRANE	Cellular component	85	74	http://www.broadinstitute.org/gsea/msigdb/cards/ENDOPLASMIC_RETICULUM_MEMBRANE	28.922	0.39363	5
GO ORGANELLE MEMBRANE	Cellular component	299	271	http://www.broadinstitute.org/gsea/msigdb/cards/ORGANELLE_MEMBRANE	28.87	13.387	15
GO TRANSMEMBRANE TRANSPORTER ACTIVITY	Molecular function	375	361	http://www.broadinstitute.org/gsea/msigdb/cards/TRANSMEMBRANE_TRANSPORTER_ACTIVITY	28.655	-0.00041198	3
GO CYTOSOL	Cellular component	205	186	http://www.broadinstitute.org/gsea/msigdb/cards/CYTOSOL	28.533	1.996	12
GO NUCLEAR PORE	Cellular component	31	28	http://www.broadinstitute.org/gsea/msigdb/cards/NUCLEAR_PORE	28.378	1.0175	3
BIOCARTA COMP PATHWAY	Immunology	19	16	http://www.broadinstitute.org/gsea/msigdb/cards/BIOCARTA_COMP_PATHWAY	28.373	-0.48217	0
KEGG STEROID HORMONE BIOSYNTHESIS	Metabolism	55	45	http://www.broadinstitute.org/gsea/msigdb/cards/KEGG_STEROID_HORMONE_BIOSYNTHESIS	28.293	3.5075	0
GO NUCLEAR ENVELOPE ENDOPLASMIC RETICULUM NETWORK	Cellular component	94	83	http://www.broadinstitute.org/gsea/msigdb/cards/NUCLEAR_ENVELOPE_ENDOPLASMIC_RETICULUM_NETWORK	28.125	0.71949	6
GO CYTOSKELETAL PROTEIN BINDING	Molecular function	159	148	http://www.broadinstitute.org/gsea/msigdb/cards/CYTOSKELETAL_PROTEIN_BINDING	28.077	5.7037	7
KEGG ARGININE AND PROLINE METABOLISM	Metabolism	54	52	http://www.broadinstitute.org/gsea/msigdb/cards/KEGG_ARGININE_AND_PROLINE_METABOLISM	27.985	0.46884	1
GO MRNA METABOLIC PROCESS	Biological process	84	62	http://www.broadinstitute.org/gsea/msigdb/cards/MRNA_METABOLIC_PROCESS	27.822	0.3811	3
GO CELL JUNCTION	Cellular component	82	75	http://www.broadinstitute.org/gsea/msigdb/cards/CELL_JUNCTION	27.708	-0.46356	2
GO INTERPHASE OF MITOTIC CELL CYCLE	Biological process	62	57	http://www.broadinstitute.org/gsea/msigdb/cards/INTERPHASE_OF_MITOTIC_CELL_CYCLE	27.688	83.196	5
GO REPRODUCTIVE PROCESS	Biological process	162	146	http://www.broadinstitute.org/gsea/msigdb/cards/REPRODUCTIVE_PROCESS	27.512	1.5955	4
GO TRANSCRIPTION FACTOR BINDING	Molecular function	307	268	http://www.broadinstitute.org/gsea/msigdb/cards/TRANSCRIPTION_FACTOR_BINDING	27.191	32.846	34
GO REGULATION OF IMMUNE SYSTEM PROCESS	Biological process	67	66	http://www.broadinstitute.org/gsea/msigdb/cards/REGULATION_OF_IMMUNE_SYSTEM_PROCESS	27.007	-1.0189	3
GO G PROTEIN SIGNALING COUPLED TO CYCLIC NUCLEOTIDE SECOND MESSENGER	Biological process	100	98	http://www.broadinstitute.org/gsea/msigdb/cards/G_PROTEIN_SIGNALING_COUPLED_TO_CYCLIC_NUCLEOTIDE_SECOND_MESSENGER	26.822	-0.61141	3
GO RNA POLYMERASE II TRANSCRIPTION FACTOR ACTIVITY	Molecular function	182	166	http://www.broadinstitute.org/gsea/msigdb/cards/RNA_POLYMERASE_II_TRANSCRIPTION_FACTOR_ACTIVITY	26.675	28.505	16
GO HYDROLASE ACTIVITY ACTING ON ACID ANHYDRIDES	Molecular function	228	206	http://www.broadinstitute.org/gsea/msigdb/cards/HYDROLASE_ACTIVITY_ACTING_ON_ACID_ANHYDRIDES	26.578	7.6031	9
GO EXTRACELLULAR MATRIX PART	Cellular component	57	54	http://www.broadinstitute.org/gsea/msigdb/cards/EXTRACELLULAR_MATRIX_PART	26.368	100.43	0
GO MONOOXYGENASE ACTIVITY	Molecular function	31	28	http://www.broadinstitute.org/gsea/msigdb/cards/MONOOXYGENASE_ACTIVITY	26.32	-0.61181	0
GO NEGATIVE REGULATION OF TRANSCRIPTION	Biological process	188	163	http://www.broadinstitute.org/gsea/msigdb/cards/NEGATIVE_REGULATION_OF_TRANSCRIPTION	26.292	128.18	19
GO TISSUE DEVELOPMENT	Biological process	138	131	http://www.broadinstitute.org/gsea/msigdb/cards/TISSUE_DEVELOPMENT	26.249	0.015831	10
GO NEUROTRANSMITTER RECEPTOR ACTIVITY	Molecular function	50	49	http://www.broadinstitute.org/gsea/msigdb/cards/NEUROTRANSMITTER_RECEPTOR_ACTIVITY	26.198	-2.7542	0
GO LIPID METABOLIC PROCESS	Biological process	325	287	http://www.broadinstitute.org/gsea/msigdb/cards/LIPID_METABOLIC_PROCESS	26.132	39.099	5
BIOCARTA ACTINY PATHWAY	Cell Activation – Cell Signaling	20	19	http://www.broadinstitute.org/gsea/msigdb/cards/BIOCARTA_ACTINY_PATHWAY	25.336	0.70193	2
GO CYCLIC NUCLEOTIDE MEDIATED SIGNALING	Biological process	102	100	http://www.broadinstitute.org/gsea/msigdb/cards/CYCLIC_NUCLEOTIDE_MEDIATED_SIGNALING	25.223	-0.66629	3
GO PYROPHOSPHATASE ACTIVITY	Molecular function	226	204	http://www.broadinstitute.org/gsea/msigdb/cards/PYROPHOSPHATASE_ACTIVITY	25.079	5.7157	9
GO RIBONUCLEOPROTEIN COMPLEX BIOGENESIS AND ASSEMBLY	Biological process	86	56	http://www.broadinstitute.org/gsea/msigdb/cards/RIBONUCLEOPROTEIN_COMPLEX_BIOGENESIS_AND_ASSEMBLY	25.069	2.2651	3
GO CHROMOSOMEPERICENTRIC REGION	Cellular component	31	27	http://www.broadinstitute.org/gsea/msigdb/cards/CHROMOSOMEPERICENTRIC_REGION	25.031	120.9	2
KEGG AUTOIMMUNE THYROID DISEASE	Human Diseases	53	49	http://www.broadinstitute.org/gsea/msigdb/cards/KEGG_AUTOIMMUNE_THYROID_DISEASE	24.988	-0.55168	3
GO MULTI ORGANISM PROCESS	Biological process	165	146	http://www.broadinstitute.org/gsea/msigdb/cards/MULTI_ORGANISM_PROCESS	24.834	1.8118	4
GO RESPONSE TO WOUNDING	Biological process	190	173	http://www.broadinstitute.org/gsea/msigdb/cards/RESPONSE_TO_WOUNDING	24.776	0.20475	4
GO ACTIVE TRANSMEMBRANE TRANSPORTER ACTIVITY	Molecular function	122	120	http://www.broadinstitute.org/gsea/msigdb/cards/ACTIVE_TRANSMEMBRANE_TRANSPORTER_ACTIVITY	24.446	3.9159	0
GO MICROTUBULE ASSOCIATED COMPLEX	Cellular component	47	44	http://www.broadinstitute.org/gsea/msigdb/cards/MICROTUBULE_ASSOCIATED_COMPLEX	24.135	-0.19532	1
GO STRUCTURE SPECIFIC DNA BINDING	Molecular function	56	53	http://www.broadinstitute.org/gsea/msigdb/cards/STRUCTURE_SPECIFIC_DNA_BINDING	23.886	17.093	12
GO PHOSPHOLIPID METABOLIC PROCESS	Biological process	74	63	http://www.broadinstitute.org/gsea/msigdb/cards/PHOSPHOLIPID_METABOLIC_PROCESS	23.681	13.011	2
GO DOUBLE STRANDED DNA BINDING	Molecular function	32	31	http://www.broadinstitute.org/gsea/msigdb/cards/DOUBLE_STRANDED_DNA_BINDING	23.543	5.837	7
GO AMINE TRANSMEMBRANE TRANSPORTER ACTIVITY	Molecular function	41	41	http://www.broadinstitute.org/gsea/msigdb/cards/AMINE_TRANSMEMBRANE_TRANSPORTER_ACTIVITY	23.526	0.69796	0
GO NUCLEAR EXPORT	Biological process	33	29	http://www.broadinstitute.org/gsea/msigdb/cards/NUCLEAR_EXPORT	23.519	0.46209	3
GO CATABOLIC PROCESS	Biological process	225	206	http://www.broadinstitute.org/gsea/msigdb/cards/CATABOLIC_PROCESS	23.511	4.5807	11
GO CYTOSKELETON	Cellular component	367	336	http://www.broadinstitute.org/gsea/msigdb/cards/CYTOSKELETON	23.457	33.17	21
GO G1 S TRANSITION OF MITOTIC CELL CYCLE	Biological process	27	27	http://www.broadinstitute.org/gsea/msigdb/cards/G1_S_TRANSITION_OF_MITOTIC_CELL_CYCLE	23.349	16.674	3
GO COLLAGEN	Cellular component	23	23	http://www.broadinstitute.org/gsea/msigdb/cards/COLLAGEN	23.305	42.437	0
KEGG LYSOSOME	Cellular Processes	121	115	http://www.broadinstitute.org/gsea/msigdb/cards/KEGG_LYSOSOME	23.289	116.05	2
GO PROTEIN SERINE THREONINE PHOSPHATASE ACTIVITY	Molecular function	24	23	http://www.broadinstitute.org/gsea/msigdb/cards/PROTEIN_SERINE_THREONINE_PHOSPHATASE_ACTIVITY	23.043	-0.51529	2
BIOCARTA ATM PATHWAY	Apoptosis - Cell Signaling	20	20	http://www.broadinstitute.org/gsea/msigdb/cards/BIOCARTA_ATM_PATHWAY	23.035	29.191	7
GO CONDENSED CHROMOSOME	Cellular component	34	29	http://www.broadinstitute.org/gsea/msigdb/cards/CONDENSED_CHROMOSOME	22.818	16.342	0
GO TRANSMEMBRANE RECEPTOR PROTEIN KINASE ACTIVITY	Molecular function	51	51	http://www.broadinstitute.org/gsea/msigdb/cards/TRANSMEMBRANE_RECEPTOR_PROTEIN_KINASE_ACTIVITY	22.539	0.61582	10
BIOCARTA NDKDYNAMIN PATHWAY	Neuroscience	21	17	http://www.broadinstitute.org/gsea/msigdb/cards/BIOCARTA_NDKDYNAMIN_PATHWAY	22.527	0.43077	2
GO NUCLEOSIDE TRIPHOSPHATASE ACTIVITY	Molecular function	212	190	http://www.broadinstitute.org/gsea/msigdb/cards/NUCLEOSIDE_TRIPHOSPHATASE_ACTIVITY	22.092	9.7722	8
GO CELL CELL ADHESION	Biological process	86	79	http://www.broadinstitute.org/gsea/msigdb/cards/CELL_CELL_ADHESION	21.926	-0.68368	6
GO CELLULAR CARBOHYDRATE METABOLIC PROCESS	Biological process	126	120	http://www.broadinstitute.org/gsea/msigdb/cards/CELLULAR_CARBOHYDRATE_METABOLIC_PROCESS	21.842	40.313	8
GO MITOCHONDRIAL RESPIRATORY CHAIN	Cellular component	24	23	http://www.broadinstitute.org/gsea/msigdb/cards/MITOCHONDRIAL_RESPIRATORY_CHAIN	21.607	11.695	0
GO MRNA PROCESSING GO 0006397	Biological process	73	51	http://www.broadinstitute.org/gsea/msigdb/cards/MRNA_PROCESSING_GO_0006397	21.544	2.0839	3
KEGG RNA POLYMERASE	Genetic Information Processing	29	28	http://www.broadinstitute.org/gsea/msigdb/cards/KEGG_RNA_POLYMERASE	21.468	2.074	0
KEGG MISMATCH REPAIR	Genetic Information Processing	23	22	http://www.broadinstitute.org/gsea/msigdb/cards/KEGG_MISMATCH_REPAIR	21.342	65.67	4
GO LIPID BINDING	Molecular function	87	73	http://www.broadinstitute.org/gsea/msigdb/cards/LIPID_BINDING	21.293	17.341	1
GO SULFUR METABOLIC PROCESS	Biological process	37	34	http://www.broadinstitute.org/gsea/msigdb/cards/SULFUR_METABOLIC_PROCESS	21.226	23.428	1
GO G PROTEIN SIGNALING COUPLED TO CAMP NUCLEOTIDE SECOND MESSENGER	Biological process	64	64	http://www.broadinstitute.org/gsea/msigdb/cards/G_PROTEIN_SIGNALING_COUPLED_TO_CAMP_NUCLEOTIDE_SECOND_MESSENGER	21.201	-0.26385	2
KEGG TRYPTOPHAN METABOLISM	Metabolism	40	38	http://www.broadinstitute.org/gsea/msigdb/cards/KEGG_TRYPTOPHAN_METABOLISM	21.179	27.597	1
GO EXTRACELLULAR SPACE	Cellular component	245	229	http://www.broadinstitute.org/gsea/msigdb/cards/EXTRACELLULAR_SPACE	21.141	0.30421	1
KEGG GLUTATHIONE METABOLISM	Metabolism	50	45	http://www.broadinstitute.org/gsea/msigdb/cards/KEGG_GLUTATHIONE_METABOLISM	21.134	1.8758	2
GO NUCLEAR CHROMOSOME	Cellular component	54	50	http://www.broadinstitute.org/gsea/msigdb/cards/NUCLEAR_CHROMOSOME	21.079	42.616	4
GO PHOSPHOLIPID BINDING	Molecular function	47	39	http://www.broadinstitute.org/gsea/msigdb/cards/PHOSPHOLIPID_BINDING	20.751	22.989	1
KEGG METABOLISM OF XENOBIOTICS BY CYTOCHROME P450	Metabolism	70	60	http://www.broadinstitute.org/gsea/msigdb/cards/KEGG_METABOLISM_OF_XENOBIOTICS_BY_CYTOCHROME_P450	20.628	-0.059297	0
GO M PHASE	Biological process	114	101	http://www.broadinstitute.org/gsea/msigdb/cards/M_PHASE	20.597	171.15	5
KEGG GLYCOLYSIS GLUCONEOGENESIS	Metabolism	62	60	http://www.broadinstitute.org/gsea/msigdb/cards/KEGG_GLYCOLYSIS_GLUCONEOGENESIS	20.462	0.51083	1
GO PHAGOCYTOSIS	Biological process	17	17	http://www.broadinstitute.org/gsea/msigdb/cards/PHAGOCYTOSIS	20.349	-0.62223	1
GO PROTEINACEOUS EXTRACELLULAR MATRIX	Cellular component	98	92	http://www.broadinstitute.org/gsea/msigdb/cards/PROTEINACEOUS_EXTRACELLULAR_MATRIX	20.348	116.07	0
GO CELL MIGRATION	Biological process	96	90	http://www.broadinstitute.org/gsea/msigdb/cards/CELL_MIGRATION	20.269	0.12371	6
GO ORGANIC ACID TRANSMEMBRANE TRANSPORTER ACTIVITY	Molecular function	45	45	http://www.broadinstitute.org/gsea/msigdb/cards/ORGANIC_ACID_TRANSMEMBRANE_TRANSPORTER_ACTIVITY	20.245	0.23542	0
BIOCARTA MAPK PATHWAY	Cell Signaling	87	85	http://www.broadinstitute.org/gsea/msigdb/cards/BIOCARTA_MAPK_PATHWAY	20.245	-0.70152	13
KEGG INOSITOL PHOSPHATE METABOLISM	Metabolism	54	46	http://www.broadinstitute.org/gsea/msigdb/cards/KEGG_INOSITOL_PHOSPHATE_METABOLISM	20.003	17.767	2
GO ACTIN BINDING	Molecular function	76	69	http://www.broadinstitute.org/gsea/msigdb/cards/ACTIN_BINDING	19.99	0.16026	3
GO CYTOSKELETON ORGANIZATION AND BIOGENESIS	Biological process	208	195	http://www.broadinstitute.org/gsea/msigdb/cards/CYTOSKELETON_ORGANIZATION_AND_BIOGENESIS	19.94	9.1806	12
GO UBIQUITIN CYCLE	Biological process	48	46	http://www.broadinstitute.org/gsea/msigdb/cards/UBIQUITIN_CYCLE	19.834	1.0017	9
KEGG FRUCTOSE AND MANNOSE METABOLISM	Metabolism	34	34	http://www.broadinstitute.org/gsea/msigdb/cards/KEGG_FRUCTOSE_AND_MANNOSE_METABOLISM	19.407	-0.64811	0
GO RNA DEPENDENT ATPASE ACTIVITY	Molecular function	18	15	http://www.broadinstitute.org/gsea/msigdb/cards/RNA_DEPENDENT_ATPASE_ACTIVITY	19.142	0.00092351	0
GO ENDOMEMBRANE SYSTEM	Cellular component	220	194	http://www.broadinstitute.org/gsea/msigdb/cards/ENDOMEMBRANE_SYSTEM	19.076	-0.25045	14
BIOCARTA BIOPEPTIDES PATHWAY	Cell Signaling	45	41	http://www.broadinstitute.org/gsea/msigdb/cards/BIOCARTA_BIOPEPTIDES_PATHWAY	18.963	0.29003	7
GO RECEPTOR COMPLEX	Cellular component	56	54	http://www.broadinstitute.org/gsea/msigdb/cards/RECEPTOR_COMPLEX	18.907	-0.0011444	5
GO TRANSCRIPTION FACTOR ACTIVITY	Molecular function	354	320	http://www.broadinstitute.org/gsea/msigdb/cards/TRANSCRIPTION_FACTOR_ACTIVITY	18.785	66.87	44
GO CELLULAR RESPIRATION	Biological process	19	19	http://www.broadinstitute.org/gsea/msigdb/cards/CELLULAR_RESPIRATION	18.781	0.066028	3
GO TRANSFERASE ACTIVITY TRANSFERRING GLYCOSYL GROUPS	Molecular function	112	103	http://www.broadinstitute.org/gsea/msigdb/cards/TRANSFERASE_ACTIVITY_TRANSFERRING_GLYCOSYL_GROUPS	18.661	-0.74477	2
GO NUCLEAR ENVELOPE	Cellular component	73	67	http://www.broadinstitute.org/gsea/msigdb/cards/NUCLEAR_ENVELOPE	18.601	1.8357	6
GO RESPONSE TO ENDOGENOUS STIMULUS	Biological process	200	184	http://www.broadinstitute.org/gsea/msigdb/cards/RESPONSE_TO_ENDOGENOUS_STIMULUS	18.599	51.698	31
GO NEGATIVE REGULATION OF TRANSCRIPTION DNA DEPENDENT	Biological process	130	113	http://www.broadinstitute.org/gsea/msigdb/cards/NEGATIVE_REGULATION_OF_TRANSCRIPTION_DNA_DEPENDENT	18.524	98.181	15
GO NEGATIVE REGULATION OF RNA METABOLIC PROCESS	Biological process	132	113	http://www.broadinstitute.org/gsea/msigdb/cards/NEGATIVE_REGULATION_OF_RNA_METABOLIC_PROCESS	18.524	98.181	15
GO NUCLEAR MEMBRANE	Cellular component	50	47	http://www.broadinstitute.org/gsea/msigdb/cards/NUCLEAR_MEMBRANE	18.488	3.0048	5
GO PROTEIN MODIFICATION BY SMALL PROTEIN CONJUGATION	Biological process	43	40	http://www.broadinstitute.org/gsea/msigdb/cards/PROTEIN_MODIFICATION_BY_SMALL_PROTEIN_CONJUGATION	18.448	2.3593	9
KEGG NOD LIKE RECEPTOR SIGNALING PATHWAY	Organismal Systems	62	51	http://www.broadinstitute.org/gsea/msigdb/cards/KEGG_NOD_LIKE_RECEPTOR_SIGNALING_PATHWAY	18.445	1.7852	2
GO HYDROGEN ION TRANSMEMBRANE TRANSPORTER ACTIVITY	Molecular function	27	26	http://www.broadinstitute.org/gsea/msigdb/cards/HYDROGEN_ION_TRANSMEMBRANE_TRANSPORTER_ACTIVITY	18.105	29.683	0
GO PROTEIN SERINE THREONINE KINASE ACTIVITY	Molecular function	205	196	http://www.broadinstitute.org/gsea/msigdb/cards/PROTEIN_SERINE_THREONINE_KINASE_ACTIVITY	18.088	3.7575	7
GO KINETOCHORE	Cellular component	25	22	http://www.broadinstitute.org/gsea/msigdb/cards/KINETOCHORE	17.936	82.367	2
GO ATP DEPENDENT HELICASE ACTIVITY	Molecular function	27	22	http://www.broadinstitute.org/gsea/msigdb/cards/ATP_DEPENDENT_HELICASE_ACTIVITY	17.753	0.0056114	0
GO CARBOXYLIC ACID TRANSMEMBRANE TRANSPORTER ACTIVITY	Molecular function	44	44	http://www.broadinstitute.org/gsea/msigdb/cards/CARBOXYLIC_ACID_TRANSMEMBRANE_TRANSPORTER_ACTIVITY	17.727	0.93882	0
GO REGULATION OF TRANSCRIPTION FROM RNA POLYMERASE II PROMOTER	Biological process	289	259	http://www.broadinstitute.org/gsea/msigdb/cards/REGULATION_OF_TRANSCRIPTION_FROM_RNA_POLYMERASE_II_PROMOTER	17.603	92.093	33
GO REPRODUCTION	Biological process	265	235	http://www.broadinstitute.org/gsea/msigdb/cards/REPRODUCTION	17.433	1.8612	6
GO DEFENSE RESPONSE TO BACTERIUM	Biological process	25	20	http://www.broadinstitute.org/gsea/msigdb/cards/DEFENSE_RESPONSE_TO_BACTERIUM	17.405	-0.89096	0
GO ENERGY DERIVATION BY OXIDATION OF ORGANIC COMPOUNDS	Biological process	37	37	http://www.broadinstitute.org/gsea/msigdb/cards/ENERGY_DERIVATION_BY_OXIDATION_OF_ORGANIC_COMPOUNDS	17.293	-0.28008	3
GO CAMP MEDIATED SIGNALING	Biological process	65	65	http://www.broadinstitute.org/gsea/msigdb/cards/CAMP_MEDIATED_SIGNALING	17.242	-0.51354	2
GO EXTRACELLULAR REGION PART	Cellular component	338	316	http://www.broadinstitute.org/gsea/msigdb/cards/EXTRACELLULAR_REGION_PART	17.217	32.702	1
GO SULFURIC ESTER HYDROLASE ACTIVITY	Molecular function	16	15	http://www.broadinstitute.org/gsea/msigdb/cards/SULFURIC_ESTER_HYDROLASE_ACTIVITY	17.12	-0.23516	0
GO DNA REPLICATION	Biological process	102	88	http://www.broadinstitute.org/gsea/msigdb/cards/DNA_REPLICATION	16.969	60.323	11
GO TRANSMEMBRANE RECEPTOR PROTEIN TYROSINE KINASE ACTIVITY	Molecular function	43	43	http://www.broadinstitute.org/gsea/msigdb/cards/TRANSMEMBRANE_RECEPTOR_PROTEIN_TYROSINE_KINASE_ACTIVITY	16.542	0.0028893	10
GO SPLICEOSOME	Cellular component	51	40	http://www.broadinstitute.org/gsea/msigdb/cards/SPLICEOSOME	16.264	26.156	3
GO CARBOHYDRATE METABOLIC PROCESS	Biological process	180	171	http://www.broadinstitute.org/gsea/msigdb/cards/CARBOHYDRATE_METABOLIC_PROCESS	16.26	25.287	9
GO BONE REMODELING	Biological process	29	28	http://www.broadinstitute.org/gsea/msigdb/cards/BONE_REMODELING	16.256	2.0892	2
GO LIGAND GATED CHANNEL ACTIVITY	Molecular function	40	36	http://www.broadinstitute.org/gsea/msigdb/cards/LIGAND_GATED_CHANNEL_ACTIVITY	16.061	-1.3537	0
GO AEROBIC RESPIRATION	Biological process	15	15	http://www.broadinstitute.org/gsea/msigdb/cards/AEROBIC_RESPIRATION	16.02	0.70329	3
GO TRANSLATION FACTOR ACTIVITY NUCLEIC ACID BINDING	Molecular function	39	29	http://www.broadinstitute.org/gsea/msigdb/cards/TRANSLATION_FACTOR_ACTIVITY_NUCLEIC_ACID_BINDING	15.842	4.6417	1
KEGG PHOSPHATIDYLINOSITOL SIGNALING SYSTEM	Environmental Information Processing	76	67	http://www.broadinstitute.org/gsea/msigdb/cards/KEGG_PHOSPHATIDYLINOSITOL_SIGNALING_SYSTEM	15.838	47.009	3
KEGG PURINE METABOLISM	Metabolism	159	149	http://www.broadinstitute.org/gsea/msigdb/cards/KEGG_PURINE_METABOLISM	15.706	16.198	5
GO NEGATIVE REGULATION OF NUCLEOBASENUCLEOSIDENUCLEOTIDE AND NUCLEIC ACID METABOLIC PROCESS	Biological process	211	183	http://www.broadinstitute.org/gsea/msigdb/cards/NEGATIVE_REGULATION_OF_NUCLEOBASENUCLEOSIDENUCLEOTIDE_AND_NUCLEIC_ACID_METABOLIC_PROCESS	15.425	149.19	22
BIOCARTA INFLAM PATHWAY	Cell Signaling-Cytokines/Chemokines	29	29	http://www.broadinstitute.org/gsea/msigdb/cards/BIOCARTA_INFLAM_PATHWAY	15.394	-0.0064586	1
GO TISSUE REMODELING	Biological process	30	29	http://www.broadinstitute.org/gsea/msigdb/cards/TISSUE_REMODELING	15.23	0.65168	2
KEGG STEROID BIOSYNTHESIS	Metabolism	17	16	http://www.broadinstitute.org/gsea/msigdb/cards/KEGG_STEROID_BIOSYNTHESIS	15.178	34.373	0
GO BASEMENT MEMBRANE	Cellular component	37	34	http://www.broadinstitute.org/gsea/msigdb/cards/BASEMENT_MEMBRANE	14.952	16.864	0
GO EXTRACELLULAR MATRIX	Cellular component	100	94	http://www.broadinstitute.org/gsea/msigdb/cards/EXTRACELLULAR_MATRIX	14.912	93.93	0
GO AMINE BINDING	Molecular function	23	22	http://www.broadinstitute.org/gsea/msigdb/cards/AMINE_BINDING	14.908	0.87343	0
GO SUBSTRATE SPECIFIC TRANSMEMBRANE TRANSPORTER ACTIVITY	Molecular function	344	331	http://www.broadinstitute.org/gsea/msigdb/cards/SUBSTRATE_SPECIFIC_TRANSMEMBRANE_TRANSPORTER_ACTIVITY	14.875	-1.5505	3
KEGG LINOLEIC ACID METABOLISM	Metabolism	29	27	http://www.broadinstitute.org/gsea/msigdb/cards/KEGG_LINOLEIC_ACID_METABOLISM	14.827	1.7319	0
GO CARBON CARBON LYASE ACTIVITY	Molecular function	18	18	http://www.broadinstitute.org/gsea/msigdb/cards/CARBON_CARBON_LYASE_ACTIVITY	14.781	8.0771	0
GO TRANSLATION REGULATOR ACTIVITY	Molecular function	41	31	http://www.broadinstitute.org/gsea/msigdb/cards/TRANSLATION_REGULATOR_ACTIVITY	14.744	4.5802	1
GO MONOCARBOXYLIC ACID METABOLIC PROCESS	Biological process	88	81	http://www.broadinstitute.org/gsea/msigdb/cards/MONOCARBOXYLIC_ACID_METABOLIC_PROCESS	14.5	0.74203	2
GO FEEDING BEHAVIOR	Biological process	24	23	http://www.broadinstitute.org/gsea/msigdb/cards/FEEDING_BEHAVIOR	14.444	-0.096327	0
KEGG CHRONIC MYELOID LEUKEMIA	Human Diseases	73	72	http://www.broadinstitute.org/gsea/msigdb/cards/KEGG_CHRONIC_MYELOID_LEUKEMIA	14.353	11.433	26
KEGG BASAL TRANSCRIPTION FACTORS	Genetic Information Processing	36	33	http://www.broadinstitute.org/gsea/msigdb/cards/KEGG_BASAL_TRANSCRIPTION_FACTORS	14.133	0.12078	0
KEGG LYSINE DEGRADATION	Metabolism	44	43	http://www.broadinstitute.org/gsea/msigdb/cards/KEGG_LYSINE_DEGRADATION	13.981	1.3077	5
GO ACID AMINO ACID LIGASE ACTIVITY	Molecular function	57	51	http://www.broadinstitute.org/gsea/msigdb/cards/ACID_AMINO_ACID_LIGASE_ACTIVITY	13.958	-0.29738	6
GO PEPTIDE RECEPTOR ACTIVITY	Molecular function	53	48	http://www.broadinstitute.org/gsea/msigdb/cards/PEPTIDE_RECEPTOR_ACTIVITY	13.854	-4.254	0
GO REGULATION OF CELL DIFFERENTIATION	Biological process	60	53	http://www.broadinstitute.org/gsea/msigdb/cards/REGULATION_OF_CELL_DIFFERENTIATION	13.803	2.4319	8
GO POSITIVE REGULATION OF MULTICELLULAR ORGANISMAL PROCESS	Biological process	66	63	http://www.broadinstitute.org/gsea/msigdb/cards/POSITIVE_REGULATION_OF_MULTICELLULAR_ORGANISMAL_PROCESS	13.75	-0.20964	4
GO GTPASE REGULATOR ACTIVITY	Molecular function	125	113	http://www.broadinstitute.org/gsea/msigdb/cards/GTPASE_REGULATOR_ACTIVITY	13.658	-0.48098	5
GO TRANSCRIPTION FACTOR COMPLEX	Cellular component	89	76	http://www.broadinstitute.org/gsea/msigdb/cards/TRANSCRIPTION_FACTOR_COMPLEX	13.532	-0.0036295	4
GO DNA DEPENDENT ATPASE ACTIVITY	Molecular function	22	19	http://www.broadinstitute.org/gsea/msigdb/cards/DNA_DEPENDENT_ATPASE_ACTIVITY	13.501	13.369	0
GO INTERCELLULAR JUNCTION	Cellular component	65	60	http://www.broadinstitute.org/gsea/msigdb/cards/INTERCELLULAR_JUNCTION	13.375	-0.48219	2
GO ANION CHANNEL ACTIVITY	Molecular function	20	17	http://www.broadinstitute.org/gsea/msigdb/cards/ANION_CHANNEL_ACTIVITY	13.138	-0.44372	0
GO CHLORIDE CHANNEL ACTIVITY	Molecular function	19	17	http://www.broadinstitute.org/gsea/msigdb/cards/CHLORIDE_CHANNEL_ACTIVITY	13.138	-0.44372	0
GO ENZYME REGULATOR ACTIVITY	Molecular function	323	303	http://www.broadinstitute.org/gsea/msigdb/cards/ENZYME_REGULATOR_ACTIVITY	13.078	-0.22528	18
GO CARBON OXYGEN LYASE ACTIVITY	Molecular function	31	31	http://www.broadinstitute.org/gsea/msigdb/cards/CARBON_OXYGEN_LYASE_ACTIVITY	12.958	33.031	1
GO GLYCEROPHOSPHOLIPID METABOLIC PROCESS	Biological process	46	39	http://www.broadinstitute.org/gsea/msigdb/cards/GLYCEROPHOSPHOLIPID_METABOLIC_PROCESS	12.823	7.5242	2
KEGG HEMATOPOIETIC CELL LINEAGE	Organismal Systems	88	83	http://www.broadinstitute.org/gsea/msigdb/cards/KEGG_HEMATOPOIETIC_CELL_LINEAGE	12.81	4.197	4
GO PROTEIN UBIQUITINATION	Biological process	40	38	http://www.broadinstitute.org/gsea/msigdb/cards/PROTEIN_UBIQUITINATION	12.805	1.1084	9
GO HISTONE DEACETYLASE COMPLEX	Cellular component	20	16	http://www.broadinstitute.org/gsea/msigdb/cards/HISTONE_DEACETYLASE_COMPLEX	12.753	1.0469	0
GO SENSORY PERCEPTION	Biological process	190	180	http://www.broadinstitute.org/gsea/msigdb/cards/SENSORY_PERCEPTION	12.638	-2.6807	2
KEGG CARDIAC MUSCLE CONTRACTION	Organismal Systems	80	70	http://www.broadinstitute.org/gsea/msigdb/cards/KEGG_CARDIAC_MUSCLE_CONTRACTION	12.437	4.8277	3
GO SULFUR COMPOUND BIOSYNTHETIC PROCESS	Biological process	18	16	http://www.broadinstitute.org/gsea/msigdb/cards/SULFUR_COMPOUND_BIOSYNTHETIC_PROCESS	12.431	7.2208	1
GO FATTY ACID OXIDATION	Biological process	18	18	http://www.broadinstitute.org/gsea/msigdb/cards/FATTY_ACID_OXIDATION	12.319	7.7916	0
GO NUCLEAR MEMBRANE PART	Cellular component	42	39	http://www.broadinstitute.org/gsea/msigdb/cards/NUCLEAR_MEMBRANE_PART	12.244	2.7108	3
GO CYTOSKELETAL PART	Cellular component	235	215	http://www.broadinstitute.org/gsea/msigdb/cards/CYTOSKELETAL_PART	12.16	12.073	15
GO GLYCOPROTEIN METABOLIC PROCESS	Biological process	90	85	http://www.broadinstitute.org/gsea/msigdb/cards/GLYCOPROTEIN_METABOLIC_PROCESS	11.951	0.0023695	2
GO ER GOLGI INTERMEDIATE COMPARTMENT	Cellular component	24	21	http://www.broadinstitute.org/gsea/msigdb/cards/ER_GOLGI_INTERMEDIATE_COMPARTMENT	11.915	-0.51231	0
GO DEPHOSPHORYLATION	Biological process	70	70	http://www.broadinstitute.org/gsea/msigdb/cards/DEPHOSPHORYLATION	11.889	2.0124	2
GO REGULATION OF PEPTIDYL TYROSINE PHOSPHORYLATION	Biological process	18	17	http://www.broadinstitute.org/gsea/msigdb/cards/REGULATION_OF_PEPTIDYL_TYROSINE_PHOSPHORYLATION	11.777	-1.0591	3
GO BEHAVIOR	Biological process	153	140	http://www.broadinstitute.org/gsea/msigdb/cards/BEHAVIOR	11.764	-4.8053	4
GO POST TRANSLATIONAL PROTEIN MODIFICATION	Biological process	476	439	http://www.broadinstitute.org/gsea/msigdb/cards/POST_TRANSLATIONAL_PROTEIN_MODIFICATION	11.726	-0.66699	39
GO CYTOKINE PRODUCTION	Biological process	73	62	http://www.broadinstitute.org/gsea/msigdb/cards/CYTOKINE_PRODUCTION	11.718	-0.46053	5
GO PROTEIN AMINO ACID PHOSPHORYLATION	Biological process	279	253	http://www.broadinstitute.org/gsea/msigdb/cards/PROTEIN_AMINO_ACID_PHOSPHORYLATION	11.666	0.48568	24
GO MYELOID LEUKOCYTE DIFFERENTIATION	Biological process	15	15	http://www.broadinstitute.org/gsea/msigdb/cards/MYELOID_LEUKOCYTE_DIFFERENTIATION	11.629	-0.011373	2
GO BASOLATERAL PLASMA MEMBRANE	Cellular component	35	30	http://www.broadinstitute.org/gsea/msigdb/cards/BASOLATERAL_PLASMA_MEMBRANE	11.525	0.042412	1
GO DOUBLE STRAND BREAK REPAIR	Biological process	23	22	http://www.broadinstitute.org/gsea/msigdb/cards/DOUBLE_STRAND_BREAK_REPAIR	11.521	2.7522	2
GO HORMONE ACTIVITY	Molecular function	44	42	http://www.broadinstitute.org/gsea/msigdb/cards/HORMONE_ACTIVITY	11.495	0.18972	0
GO SKELETAL DEVELOPMENT	Biological process	103	99	http://www.broadinstitute.org/gsea/msigdb/cards/SKELETAL_DEVELOPMENT	11.305	1.9683	9
GO MICROTUBULE CYTOSKELETON	Cellular component	152	136	http://www.broadinstitute.org/gsea/msigdb/cards/MICROTUBULE_CYTOSKELETON	11.22	7.0171	9
GO VIRAL GENOME REPLICATION	Biological process	21	20	http://www.broadinstitute.org/gsea/msigdb/cards/VIRAL_GENOME_REPLICATION	11.182	29.961	2
GO TRNA METABOLIC PROCESS	Biological process	19	18	http://www.broadinstitute.org/gsea/msigdb/cards/TRNA_METABOLIC_PROCESS	11.063	-0.031501	0
GO CHROMOSOME SEGREGATION	Biological process	32	27	http://www.broadinstitute.org/gsea/msigdb/cards/CHROMOSOME_SEGREGATION	11.056	65.819	1
GO INTERLEUKIN BINDING	Molecular function	25	24	http://www.broadinstitute.org/gsea/msigdb/cards/INTERLEUKIN_BINDING	11.027	0.31379	2
GO MEMBRANE COAT	Cellular component	17	15	http://www.broadinstitute.org/gsea/msigdb/cards/MEMBRANE_COAT	10.977	0.51321	1
GO COATED MEMBRANE	Cellular component	17	15	http://www.broadinstitute.org/gsea/msigdb/cards/COATED_MEMBRANE	10.977	0.51321	1
GO POSITIVE REGULATION OF TRANSLATION	Biological process	35	33	http://www.broadinstitute.org/gsea/msigdb/cards/POSITIVE_REGULATION_OF_TRANSLATION	10.969	-0.26547	3
GO REGULATION OF CELL GROWTH	Biological process	46	40	http://www.broadinstitute.org/gsea/msigdb/cards/REGULATION_OF_CELL_GROWTH	10.899	4.1471	7
GO RIBONUCLEASE ACTIVITY	Molecular function	25	23	http://www.broadinstitute.org/gsea/msigdb/cards/RIBONUCLEASE_ACTIVITY	10.863	14.389	1
GO PROTEIN AMINO ACID LIPIDATION	Biological process	24	23	http://www.broadinstitute.org/gsea/msigdb/cards/PROTEIN_AMINO_ACID_LIPIDATION	10.799	2.7995	0
GO CELL CYCLE ARREST GO 0007050	Biological process	57	54	http://www.broadinstitute.org/gsea/msigdb/cards/CELL_CYCLE_ARREST_GO_0007050	10.671	0.3409	9
KEGG AMINOACYL TRNA BIOSYNTHESIS	Genetic Information Processing	41	32	http://www.broadinstitute.org/gsea/msigdb/cards/KEGG_AMINOACYL_TRNA_BIOSYNTHESIS	10.628	1.2693	1
GO KINASE REGULATOR ACTIVITY	Molecular function	46	44	http://www.broadinstitute.org/gsea/msigdb/cards/KINASE_REGULATOR_ACTIVITY	10.468	0.57809	9
BIOCARTA PTDINS PATHWAY	Cell Signaling	23	23	http://www.broadinstitute.org/gsea/msigdb/cards/BIOCARTA_PTDINS_PATHWAY	10.468	-0.85866	2
GO PROTEIN TYROSINE KINASE ACTIVITY	Molecular function	63	62	http://www.broadinstitute.org/gsea/msigdb/cards/PROTEIN_TYROSINE_KINASE_ACTIVITY	10.405	0.70668	14
GO REGULATION OF SECRETION	Biological process	40	32	http://www.broadinstitute.org/gsea/msigdb/cards/REGULATION_OF_SECRETION	10.344	-0.011716	0
KEGG MAPK SIGNALING PATHWAY	Environmental Information Processing	267	256	http://www.broadinstitute.org/gsea/msigdb/cards/KEGG_MAPK_SIGNALING_PATHWAY	10.32	-0.089666	28
GO IDENTICAL PROTEIN BINDING	Molecular function	304	280	http://www.broadinstitute.org/gsea/msigdb/cards/IDENTICAL_PROTEIN_BINDING	10.318	9.2675	24
GO RESPONSE TO BIOTIC STIMULUS	Biological process	120	110	http://www.broadinstitute.org/gsea/msigdb/cards/RESPONSE_TO_BIOTIC_STIMULUS	10.233	3.6762	5
GO HYDRO LYASE ACTIVITY	Molecular function	27	27	http://www.broadinstitute.org/gsea/msigdb/cards/HYDRO_LYASE_ACTIVITY	10.222	46.571	1
GO SMALL GTPASE MEDIATED SIGNAL TRANSDUCTION	Biological process	89	82	http://www.broadinstitute.org/gsea/msigdb/cards/SMALL_GTPASE_MEDIATED_SIGNAL_TRANSDUCTION	10.085	0.22069	5
GO NEGATIVE REGULATION OF CELL DIFFERENTIATION	Biological process	28	27	http://www.broadinstitute.org/gsea/msigdb/cards/NEGATIVE_REGULATION_OF_CELL_DIFFERENTIATION	10.018	0.33359	5
GO INNATE IMMUNE RESPONSE	Biological process	23	21	http://www.broadinstitute.org/gsea/msigdb/cards/INNATE_IMMUNE_RESPONSE	10.003	0.00028395	1
GO VESICULAR FRACTION	Cellular component	44	41	http://www.broadinstitute.org/gsea/msigdb/cards/VESICULAR_FRACTION	9.9703	0.61131	0
KEGG TGF BETA SIGNALING PATHWAY	Environmental Information Processing	86	82	http://www.broadinstitute.org/gsea/msigdb/cards/KEGG_TGF_BETA_SIGNALING_PATHWAY	9.9652	16.922	5
GO POSITIVE REGULATION OF RESPONSE TO STIMULUS	Biological process	41	40	http://www.broadinstitute.org/gsea/msigdb/cards/POSITIVE_REGULATION_OF_RESPONSE_TO_STIMULUS	9.9492	-0.72339	2
GO RESPONSE TO OTHER ORGANISM	Biological process	83	75	http://www.broadinstitute.org/gsea/msigdb/cards/RESPONSE_TO_OTHER_ORGANISM	9.8936	-0.25964	3
GO CELL FRACTION	Cellular component	493	460	http://www.broadinstitute.org/gsea/msigdb/cards/CELL_FRACTION	9.891	0.46544	10
KEGG AMINO SUGAR AND NUCLEOTIDE SUGAR METABOLISM	Metabolism	44	44	http://www.broadinstitute.org/gsea/msigdb/cards/KEGG_AMINO_SUGAR_AND_NUCLEOTIDE_SUGAR_METABOLISM	9.8273	0.12995	0
KEGG NOTCH SIGNALING PATHWAY	Environmental Information Processing	47	41	http://www.broadinstitute.org/gsea/msigdb/cards/KEGG_NOTCH_SIGNALING_PATHWAY	9.8242	0.022348	5
GO SMALL CONJUGATING PROTEIN LIGASE ACTIVITY	Molecular function	51	45	http://www.broadinstitute.org/gsea/msigdb/cards/SMALL_CONJUGATING_PROTEIN_LIGASE_ACTIVITY	9.7947	-0.50038	6
KEGG JAK STAT SIGNALING PATHWAY	Environmental Information Processing	155	151	http://www.broadinstitute.org/gsea/msigdb/cards/KEGG_JAK_STAT_SIGNALING_PATHWAY	9.7918	0.0087099	27
GO PEPTIDYL TYROSINE MODIFICATION	Biological process	29	28	http://www.broadinstitute.org/gsea/msigdb/cards/PEPTIDYL_TYROSINE_MODIFICATION	9.712	-0.44408	5
KEGG REGULATION OF ACTIN CYTOSKELETON	Cellular Processes	216	196	http://www.broadinstitute.org/gsea/msigdb/cards/KEGG_REGULATION_OF_ACTIN_CYTOSKELETON	9.5773	9.0593	23
GO RNA HELICASE ACTIVITY	Molecular function	24	21	http://www.broadinstitute.org/gsea/msigdb/cards/RNA_HELICASE_ACTIVITY	9.3624	0.75958	2
GO LIPOPROTEIN BIOSYNTHETIC PROCESS	Biological process	26	25	http://www.broadinstitute.org/gsea/msigdb/cards/LIPOPROTEIN_BIOSYNTHETIC_PROCESS	9.305	0.97724	0
GO PEPTIDYL TYROSINE PHOSPHORYLATION	Biological process	27	26	http://www.broadinstitute.org/gsea/msigdb/cards/PEPTIDYL_TYROSINE_PHOSPHORYLATION	9.2328	-0.0045673	5
GO DNA DEPENDENT DNA REPLICATION	Biological process	56	47	http://www.broadinstitute.org/gsea/msigdb/cards/DNA_DEPENDENT_DNA_REPLICATION	9.1765	38.047	8
GO OXIDOREDUCTASE ACTIVITY GO 0016616	Molecular function	58	54	http://www.broadinstitute.org/gsea/msigdb/cards/OXIDOREDUCTASE_ACTIVITY_GO_0016616	9.1352	-0.0018983	1
KEGG TIGHT JUNCTION	Cellular Processes	134	125	http://www.broadinstitute.org/gsea/msigdb/cards/KEGG_TIGHT_JUNCTION	9.1207	17.642	12
GO INFLAMMATORY RESPONSE	Biological process	129	115	http://www.broadinstitute.org/gsea/msigdb/cards/INFLAMMATORY_RESPONSE	9.1174	0.48434	1
BIOCARTA P38MAPK PATHWAY	Cell Signaling	40	39	http://www.broadinstitute.org/gsea/msigdb/cards/BIOCARTA_P38MAPK_PATHWAY	8.9528	0.13127	8
GO AMINO ACID AND DERIVATIVE METABOLIC PROCESS	Biological process	101	96	http://www.broadinstitute.org/gsea/msigdb/cards/AMINO_ACID_AND_DERIVATIVE_METABOLIC_PROCESS	8.8804	6.1334	0
GO MICROSOME	Cellular component	42	39	http://www.broadinstitute.org/gsea/msigdb/cards/MICROSOME	8.8739	0.15015	0
GO RNA EXPORT FROM NUCLEUS	Biological process	20	18	http://www.broadinstitute.org/gsea/msigdb/cards/RNA_EXPORT_FROM_NUCLEUS	8.8707	-0.02967	1
GO PROTEIN KINASE REGULATOR ACTIVITY	Molecular function	39	38	http://www.broadinstitute.org/gsea/msigdb/cards/PROTEIN_KINASE_REGULATOR_ACTIVITY	8.8419	0.070499	5
GO CELLULAR DEFENSE RESPONSE	Biological process	58	51	http://www.broadinstitute.org/gsea/msigdb/cards/CELLULAR_DEFENSE_RESPONSE	8.8291	-5.3354	2
KEGG ALLOGRAFT REJECTION	Human Diseases	38	34	http://www.broadinstitute.org/gsea/msigdb/cards/KEGG_ALLOGRAFT_REJECTION	8.7928	-0.84221	2
GO CONTRACTILE FIBER PART	Cellular component	23	22	http://www.broadinstitute.org/gsea/msigdb/cards/CONTRACTILE_FIBER_PART	8.7575	0.32743	2
GO REGULATION OF CELL CYCLE	Biological process	182	167	http://www.broadinstitute.org/gsea/msigdb/cards/REGULATION_OF_CELL_CYCLE	8.7371	38.413	22
GO PHOSPHORIC MONOESTER HYDROLASE ACTIVITY	Molecular function	112	107	http://www.broadinstitute.org/gsea/msigdb/cards/PHOSPHORIC_MONOESTER_HYDROLASE_ACTIVITY	8.7311	0.016255	4
GO PROTEIN FOLDING	Biological process	58	55	http://www.broadinstitute.org/gsea/msigdb/cards/PROTEIN_FOLDING	8.6976	4.7267	0
GO TRANSFERASE ACTIVITY TRANSFERRING PENTOSYL GROUPS	Molecular function	20	18	http://www.broadinstitute.org/gsea/msigdb/cards/TRANSFERASE_ACTIVITY_TRANSFERRING_PENTOSYL_GROUPS	8.6782	-0.015002	0
GO LIGASE ACTIVITY	Molecular function	97	89	http://www.broadinstitute.org/gsea/msigdb/cards/LIGASE_ACTIVITY	8.6662	-0.32621	7
GO PEPTIDE BINDING	Molecular function	85	78	http://www.broadinstitute.org/gsea/msigdb/cards/PEPTIDE_BINDING	8.6092	-0.54058	1
GO G PROTEIN SIGNALING COUPLED TO IP3 SECOND MESSENGERPHOSPHOLIPASE C ACTIVATING	Biological process	45	40	http://www.broadinstitute.org/gsea/msigdb/cards/G_PROTEIN_SIGNALING_COUPLED_TO_IP3_SECOND_MESSENGERPHOSPHOLIPASE_C_ACTIVATING	8.6063	-0.72453	2
GO OXYGEN BINDING	Molecular function	22	21	http://www.broadinstitute.org/gsea/msigdb/cards/OXYGEN_BINDING	8.5252	-0.0036789	0
GO TRANSCRIPTION INITIATION	Biological process	35	24	http://www.broadinstitute.org/gsea/msigdb/cards/TRANSCRIPTION_INITIATION	8.492	-1.1736	2
GO APICAL JUNCTION COMPLEX	Cellular component	34	33	http://www.broadinstitute.org/gsea/msigdb/cards/APICAL_JUNCTION_COMPLEX	8.4827	0.075038	0
GO APICOLATERAL PLASMA MEMBRANE	Cellular component	34	33	http://www.broadinstitute.org/gsea/msigdb/cards/APICOLATERAL_PLASMA_MEMBRANE	8.4827	0.075038	0
GO CHROMATIN	Cellular component	35	34	http://www.broadinstitute.org/gsea/msigdb/cards/CHROMATIN	8.4591	32.257	5
BIOCARTA CTCF PATHWAY	Developmental Biology – Expression	23	22	http://www.broadinstitute.org/gsea/msigdb/cards/BIOCARTA_CTCF_PATHWAY	8.4168	-0.54997	9
KEGG PORPHYRIN AND CHLOROPHYLL METABOLISM	Metabolism	41	31	http://www.broadinstitute.org/gsea/msigdb/cards/KEGG_PORPHYRIN_AND_CHLOROPHYLL_METABOLISM	8.3586	-0.36659	0
GO OXIDOREDUCTASE ACTIVITY ACTING ON CH OH GROUP OF DONORS	Molecular function	64	60	http://www.broadinstitute.org/gsea/msigdb/cards/OXIDOREDUCTASE_ACTIVITY_ACTING_ON_CH_OH_GROUP_OF_DONORS	8.3551	3.1e-06	1
GO PROTEIN POLYMERIZATION	Biological process	19	18	http://www.broadinstitute.org/gsea/msigdb/cards/PROTEIN_POLYMERIZATION	8.2391	-0.32287	1
GO UBIQUITIN LIGASE COMPLEX	Cellular component	26	24	http://www.broadinstitute.org/gsea/msigdb/cards/UBIQUITIN_LIGASE_COMPLEX	8.2035	-0.78038	3
GO EXTRACELLULAR MATRIX STRUCTURAL CONSTITUENT	Molecular function	27	25	http://www.broadinstitute.org/gsea/msigdb/cards/EXTRACELLULAR_MATRIX_STRUCTURAL_CONSTITUENT	8.1888	1.3372	0
BIOCARTA CARM ER PATHWAY	Cell Signaling-Cytokines/Chemokines -Expression	35	32	http://www.broadinstitute.org/gsea/msigdb/cards/BIOCARTA_CARM_ER_PATHWAY	8.0795	-0.83104	5
GO NUCLEAR BODY	Cellular component	33	29	http://www.broadinstitute.org/gsea/msigdb/cards/NUCLEAR_BODY	8.0398	2.3247	6
KEGG EPITHELIAL CELL SIGNALING IN HELICOBACTER PYLORI INFECTION	Human Diseases	68	62	http://www.broadinstitute.org/gsea/msigdb/cards/KEGG_EPITHELIAL_CELL_SIGNALING_IN_HELICOBACTER_PYLORI_INFECTION	8.0163	-0.10592	6
KEGG LEUKOCYTE TRANSENDOTHELIAL MIGRATION	Organismal Systems	118	107	http://www.broadinstitute.org/gsea/msigdb/cards/KEGG_LEUKOCYTE_TRANSENDOTHELIAL_MIGRATION	7.9096	3.6145	9
GO TIGHT JUNCTION	Cellular component	31	30	http://www.broadinstitute.org/gsea/msigdb/cards/TIGHT_JUNCTION	7.8292	0.014406	0
BIOCARTA ERK5 PATHWAY	Cell Signaling-Neuroscience	18	17	http://www.broadinstitute.org/gsea/msigdb/cards/BIOCARTA_ERK5_PATHWAY	7.827	-1.6543	6
KEGG PRIMARY BILE ACID BIOSYNTHESIS	Metabolism	16	16	http://www.broadinstitute.org/gsea/msigdb/cards/KEGG_PRIMARY_BILE_ACID_BIOSYNTHESIS	7.7657	-0.030955	0
GO INDUCTION OF APOPTOSIS BY INTRACELLULAR SIGNALS	Biological process	24	22	http://www.broadinstitute.org/gsea/msigdb/cards/INDUCTION_OF_APOPTOSIS_BY_INTRACELLULAR_SIGNALS	7.6789	16.84	6
GO SUBSTRATE SPECIFIC TRANSPORTER ACTIVITY	Molecular function	392	378	http://www.broadinstitute.org/gsea/msigdb/cards/SUBSTRATE_SPECIFIC_TRANSPORTER_ACTIVITY	7.5362	-0.542	3
KEGG BETA ALANINE METABOLISM	Metabolism	22	22	http://www.broadinstitute.org/gsea/msigdb/cards/KEGG_BETA_ALANINE_METABOLISM	7.4717	11.265	1
GO SPINDLE MICROTUBULE	Cellular component	16	15	http://www.broadinstitute.org/gsea/msigdb/cards/SPINDLE_MICROTUBULE	7.4484	33.278	1
GO CYTOSKELETON DEPENDENT INTRACELLULAR TRANSPORT	Biological process	26	26	http://www.broadinstitute.org/gsea/msigdb/cards/CYTOSKELETON_DEPENDENT_INTRACELLULAR_TRANSPORT	7.4246	0.013455	2
GO HORMONE SECRETION	Biological process	17	17	http://www.broadinstitute.org/gsea/msigdb/cards/HORMONE_SECRETION	7.368	0.23672	0
GO TRANSCRIPTION INITIATION FROM RNA POLYMERASE II PROMOTER	Biological process	29	18	http://www.broadinstitute.org/gsea/msigdb/cards/TRANSCRIPTION_INITIATION_FROM_RNA_POLYMERASE_II_PROMOTER	7.3383	-1.0317	2
GO CHROMOSOME ORGANIZATION AND BIOGENESIS	Biological process	124	105	http://www.broadinstitute.org/gsea/msigdb/cards/CHROMOSOME_ORGANIZATION_AND_BIOGENESIS	7.332	58.458	14
GO METALLOPEPTIDASE ACTIVITY	Molecular function	50	44	http://www.broadinstitute.org/gsea/msigdb/cards/METALLOPEPTIDASE_ACTIVITY	7.1294	-0.00042392	0
BIOCARTA PGC1A PATHWAY	Cell Signaling – Expression	26	22	http://www.broadinstitute.org/gsea/msigdb/cards/BIOCARTA_PGC1A_PATHWAY	7.0578	0.5104	0
GO ACETYLTRANSFERASE ACTIVITY	Molecular function	25	19	http://www.broadinstitute.org/gsea/msigdb/cards/ACETYLTRANSFERASE_ACTIVITY	6.9546	0.31113	4
GO PHOSPHOINOSITIDE MEDIATED SIGNALING	Biological process	48	43	http://www.broadinstitute.org/gsea/msigdb/cards/PHOSPHOINOSITIDE_MEDIATED_SIGNALING	6.9373	-0.008303	2
GO ALCOHOL METABOLIC PROCESS	Biological process	88	84	http://www.broadinstitute.org/gsea/msigdb/cards/ALCOHOL_METABOLIC_PROCESS	6.9313	13.223	2
BIOCARTA PYK2 PATHWAY	Cell Signaling	31	26	http://www.broadinstitute.org/gsea/msigdb/cards/BIOCARTA_PYK2_PATHWAY	6.8942	0.039005	8
GO PROTEOLYSIS	Biological process	191	172	http://www.broadinstitute.org/gsea/msigdb/cards/PROTEOLYSIS	6.8899	0.63342	3
BIOCARTA CDC42RAC PATHWAY	Adhesion-Cell Signaling	16	15	http://www.broadinstitute.org/gsea/msigdb/cards/BIOCARTA_CDC42RAC_PATHWAY	6.8525	16.056	4
GO MONOVALENT INORGANIC CATION TRANSMEMBRANE TRANSPORTER ACTIVITY	Molecular function	34	32	http://www.broadinstitute.org/gsea/msigdb/cards/MONOVALENT_INORGANIC_CATION_TRANSMEMBRANE_TRANSPORTER_ACTIVITY	6.8292	11.577	0
GO REGULATION OF GENE EXPRESSION EPIGENETIC	Biological process	30	28	http://www.broadinstitute.org/gsea/msigdb/cards/REGULATION_OF_GENE_EXPRESSION_EPIGENETIC	6.8039	41.524	6
GO ACTIN FILAMENT BASED PROCESS	Biological process	115	108	http://www.broadinstitute.org/gsea/msigdb/cards/ACTIN_FILAMENT_BASED_PROCESS	6.7369	4.0321	8
GO TRANSMISSION OF NERVE IMPULSE	Biological process	189	181	http://www.broadinstitute.org/gsea/msigdb/cards/TRANSMISSION_OF_NERVE_IMPULSE	6.7217	1.906	2
GO TRANSFERASE ACTIVITY TRANSFERRING ACYL GROUPS	Molecular function	59	48	http://www.broadinstitute.org/gsea/msigdb/cards/TRANSFERASE_ACTIVITY_TRANSFERRING_ACYL_GROUPS	6.6733	8.2258	5
GO DETECTION OF STIMULUS	Biological process	47	40	http://www.broadinstitute.org/gsea/msigdb/cards/DETECTION_OF_STIMULUS	6.4333	1.5658	0
GO PROTEASOME COMPLEX	Cellular component	23	22	http://www.broadinstitute.org/gsea/msigdb/cards/PROTEASOME_COMPLEX	6.3927	4.2376	0
GO VESICLE MEDIATED TRANSPORT	Biological process	194	180	http://www.broadinstitute.org/gsea/msigdb/cards/VESICLE_MEDIATED_TRANSPORT	6.3632	5.3462	9
GO OXIDOREDUCTASE ACTIVITY ACTING ON NADH OR NADPH	Molecular function	25	25	http://www.broadinstitute.org/gsea/msigdb/cards/OXIDOREDUCTASE_ACTIVITY_ACTING_ON_NADH_OR_NADPH	6.3377	3.2073	0
GO MEMBRANE FUSION	Biological process	28	27	http://www.broadinstitute.org/gsea/msigdb/cards/MEMBRANE_FUSION	6.3079	6.8915	0
KEGG REGULATION OF AUTOPHAGY	Cellular Processes	35	33	http://www.broadinstitute.org/gsea/msigdb/cards/KEGG_REGULATION_OF_AUTOPHAGY	6.2824	0.17657	0
GO PROTEIN DNA COMPLEX ASSEMBLY	Biological process	49	37	http://www.broadinstitute.org/gsea/msigdb/cards/PROTEIN_DNA_COMPLEX_ASSEMBLY	6.2639	-0.32201	4
GO LIPOPROTEIN METABOLIC PROCESS	Biological process	33	32	http://www.broadinstitute.org/gsea/msigdb/cards/LIPOPROTEIN_METABOLIC_PROCESS	6.2618	0.27581	0
KEGG NUCLEOTIDE EXCISION REPAIR	Genetic Information Processing	44	44	http://www.broadinstitute.org/gsea/msigdb/cards/KEGG_NUCLEOTIDE_EXCISION_REPAIR	6.2269	24.85	7
BIOCARTA CREB PATHWAY	Cell Signaling – Expression – Neuroscience	27	26	http://www.broadinstitute.org/gsea/msigdb/cards/BIOCARTA_CREB_PATHWAY	6.2259	-0.44299	8
GO TRANSPORT VESICLE	Cellular component	33	26	http://www.broadinstitute.org/gsea/msigdb/cards/TRANSPORT_VESICLE	6.1633	0.00022717	1
GO NUCLEOBASENUCLEOSIDENUCLEOTIDE AND NUCLEIC ACID TRANSPORT	Biological process	31	28	http://www.broadinstitute.org/gsea/msigdb/cards/NUCLEOBASENUCLEOSIDENUCLEOTIDE_AND_NUCLEIC_ACID_TRANSPORT	6.1031	-0.39518	2
GO INTEGRIN BINDING	Molecular function	30	30	http://www.broadinstitute.org/gsea/msigdb/cards/INTEGRIN_BINDING	6.0967	-0.031385	1
KEGG NITROGEN METABOLISM	Metabolism	23	23	http://www.broadinstitute.org/gsea/msigdb/cards/KEGG_NITROGEN_METABOLISM	6.0358	2.5551	0
GO GTPASE ACTIVATOR ACTIVITY	Molecular function	60	55	http://www.broadinstitute.org/gsea/msigdb/cards/GTPASE_ACTIVATOR_ACTIVITY	5.9958	-0.60994	3
GO MICROTUBULE CYTOSKELETON ORGANIZATION AND BIOGENESIS	Biological process	35	33	http://www.broadinstitute.org/gsea/msigdb/cards/MICROTUBULE_CYTOSKELETON_ORGANIZATION_AND_BIOGENESIS	5.9758	18.485	2
GO INDUCTION OF APOPTOSIS BY EXTRACELLULAR SIGNALS	Biological process	27	27	http://www.broadinstitute.org/gsea/msigdb/cards/INDUCTION_OF_APOPTOSIS_BY_EXTRACELLULAR_SIGNALS	5.96	-0.53564	1
GO POSITIVE REGULATION OF SECRETION	Biological process	20	15	http://www.broadinstitute.org/gsea/msigdb/cards/POSITIVE_REGULATION_OF_SECRETION	5.9475	-0.10283	0
GO MEMBRANE LIPID METABOLIC PROCESS	Biological process	101	87	http://www.broadinstitute.org/gsea/msigdb/cards/MEMBRANE_LIPID_METABOLIC_PROCESS	5.9233	2.9971	2
GO COFACTOR BIOSYNTHETIC PROCESS	Biological process	21	21	http://www.broadinstitute.org/gsea/msigdb/cards/COFACTOR_BIOSYNTHETIC_PROCESS	5.8682	-0.12099	0
GO PROTEIN RNA COMPLEX ASSEMBLY	Biological process	67	44	http://www.broadinstitute.org/gsea/msigdb/cards/PROTEIN_RNA_COMPLEX_ASSEMBLY	5.8587	0.26847	3
GO BASAL LAMINA	Cellular component	21	18	http://www.broadinstitute.org/gsea/msigdb/cards/BASAL_LAMINA	5.8351	12.847	0
GO WOUND HEALING	Biological process	54	52	http://www.broadinstitute.org/gsea/msigdb/cards/WOUND_HEALING	5.7852	0.012345	3
GO INTERLEUKIN RECEPTOR ACTIVITY	Molecular function	20	19	http://www.broadinstitute.org/gsea/msigdb/cards/INTERLEUKIN_RECEPTOR_ACTIVITY	5.7656	2.0009	2
KEGG PRION DISEASES	Human Diseases	35	35	http://www.broadinstitute.org/gsea/msigdb/cards/KEGG_PRION_DISEASES	5.7567	0.0026074	3
GO ORGAN MORPHOGENESIS	Biological process	144	134	http://www.broadinstitute.org/gsea/msigdb/cards/ORGAN_MORPHOGENESIS	5.742	1.7271	14
KEGG ERBB SIGNALING PATHWAY	Environmental Information Processing	87	85	http://www.broadinstitute.org/gsea/msigdb/cards/KEGG_ERBB_SIGNALING_PATHWAY	5.7329	-0.076951	21
GO SINGLE STRANDED DNA BINDING	Molecular function	35	32	http://www.broadinstitute.org/gsea/msigdb/cards/SINGLE_STRANDED_DNA_BINDING	5.703	39.879	10
GO UBIQUITIN PROTEIN LIGASE ACTIVITY	Molecular function	49	43	http://www.broadinstitute.org/gsea/msigdb/cards/UBIQUITIN_PROTEIN_LIGASE_ACTIVITY	5.6807	-0.57378	6
KEGG HISTIDINE METABOLISM	Metabolism	29	27	http://www.broadinstitute.org/gsea/msigdb/cards/KEGG_HISTIDINE_METABOLISM	5.6499	8.4507	1
BIOCARTA LAIR PATHWAY	Immunology	17	16	http://www.broadinstitute.org/gsea/msigdb/cards/BIOCARTA_LAIR_PATHWAY	5.6353	-0.31116	0
GO ECTODERM DEVELOPMENT	Biological process	80	76	http://www.broadinstitute.org/gsea/msigdb/cards/ECTODERM_DEVELOPMENT	5.6133	-0.73411	4
GO ACTIN POLYMERIZATION AND OR DEPOLYMERIZATION	Biological process	23	21	http://www.broadinstitute.org/gsea/msigdb/cards/ACTIN_POLYMERIZATION_AND_OR_DEPOLYMERIZATION	5.54	-0.040416	1
KEGG TASTE TRANSDUCTION	Organismal Systems	52	44	http://www.broadinstitute.org/gsea/msigdb/cards/KEGG_TASTE_TRANSDUCTION	5.5073	-1.2324	1
BIOCARTA NTHI PATHWAY	Cell Signaling	24	23	http://www.broadinstitute.org/gsea/msigdb/cards/BIOCARTA_NTHI_PATHWAY	5.4678	-0.051721	3
GO FATTY ACID METABOLIC PROCESS	Biological process	63	58	http://www.broadinstitute.org/gsea/msigdb/cards/FATTY_ACID_METABOLIC_PROCESS	5.3848	6.3296	2
GO RESPONSE TO OXIDATIVE STRESS	Biological process	46	43	http://www.broadinstitute.org/gsea/msigdb/cards/RESPONSE_TO_OXIDATIVE_STRESS	5.3629	6.1203	2
GO PHOSPHOLIPID BIOSYNTHETIC PROCESS	Biological process	39	32	http://www.broadinstitute.org/gsea/msigdb/cards/PHOSPHOLIPID_BIOSYNTHETIC_PROCESS	5.3456	8.4552	0
BIOCARTA MPR PATHWAY	Cell Signaling-Developmental Biology	34	32	http://www.broadinstitute.org/gsea/msigdb/cards/BIOCARTA_MPR_PATHWAY	5.297	10.516	3
KEGG ASTHMA	Human Diseases	30	27	http://www.broadinstitute.org/gsea/msigdb/cards/KEGG_ASTHMA	5.2849	-3.2226	0
GO REGULATION OF TRANSPORT	Biological process	67	62	http://www.broadinstitute.org/gsea/msigdb/cards/REGULATION_OF_TRANSPORT	5.2726	-0.20421	6
GO CELLULAR PROTEIN COMPLEX ASSEMBLY	Biological process	33	31	http://www.broadinstitute.org/gsea/msigdb/cards/CELLULAR_PROTEIN_COMPLEX_ASSEMBLY	5.146	-0.38785	0
KEGG VIBRIO CHOLERAE INFECTION	Human Diseases	56	50	http://www.broadinstitute.org/gsea/msigdb/cards/KEGG_VIBRIO_CHOLERAE_INFECTION	5.1438	16.629	1
GO GLYCOPROTEIN BIOSYNTHETIC PROCESS	Biological process	74	71	http://www.broadinstitute.org/gsea/msigdb/cards/GLYCOPROTEIN_BIOSYNTHETIC_PROCESS	5.1315	-0.48706	2
GO DNA PACKAGING	Biological process	35	31	http://www.broadinstitute.org/gsea/msigdb/cards/DNA_PACKAGING	5.0948	6.9802	1
KEGG PPAR SIGNALING PATHWAY	Organismal Systems	69	66	http://www.broadinstitute.org/gsea/msigdb/cards/KEGG_PPAR_SIGNALING_PATHWAY	5.0827	-0.61765	2
GO PROTEIN AUTOPROCESSING	Biological process	32	28	http://www.broadinstitute.org/gsea/msigdb/cards/PROTEIN_AUTOPROCESSING	5.0647	3.5145	2
BIOCARTA RHO PATHWAY	Adhesion - Cell Signaling-Cytokines/Chemokines	32	31	http://www.broadinstitute.org/gsea/msigdb/cards/BIOCARTA_RHO_PATHWAY	5.0607	9.9097	0
GO CELL MATRIX JUNCTION	Cellular component	18	16	http://www.broadinstitute.org/gsea/msigdb/cards/CELL_MATRIX_JUNCTION	5.0299	0.078	0
BIOCARTA FAS PATHWAY	Apoptosis - Cell Signaling – Immunology	30	30	http://www.broadinstitute.org/gsea/msigdb/cards/BIOCARTA_FAS_PATHWAY	4.9772	3.2509	4
GO REGULATION OF BIOLOGICAL QUALITY	Biological process	419	383	http://www.broadinstitute.org/gsea/msigdb/cards/REGULATION_OF_BIOLOGICAL_QUALITY	4.9726	0.062688	24
GO MICROTUBULE BASED PROCESS	Biological process	82	76	http://www.broadinstitute.org/gsea/msigdb/cards/MICROTUBULE_BASED_PROCESS	4.9653	2.7616	5
GO SEQUENCE SPECIFIC DNA BINDING	Molecular function	58	48	http://www.broadinstitute.org/gsea/msigdb/cards/SEQUENCE_SPECIFIC_DNA_BINDING	4.9617	9.4582	6
BIOCARTA ARF PATHWAY	Cell Signaling-Expression	17	17	http://www.broadinstitute.org/gsea/msigdb/cards/BIOCARTA_ARF_PATHWAY	4.8563	0.66251	9
GO PROTEIN C TERMINUS BINDING	Molecular function	73	71	http://www.broadinstitute.org/gsea/msigdb/cards/PROTEIN_C_TERMINUS_BINDING	4.835	1.8089	11
GO GLYCEROPHOSPHOLIPID BIOSYNTHETIC PROCESS	Biological process	30	26	http://www.broadinstitute.org/gsea/msigdb/cards/GLYCEROPHOSPHOLIPID_BIOSYNTHETIC_PROCESS	4.832	4.0687	0
GO POSITIVE REGULATION OF PROTEIN AMINO ACID PHOSPHORYLATION	Biological process	20	18	http://www.broadinstitute.org/gsea/msigdb/cards/POSITIVE_REGULATION_OF_PROTEIN_AMINO_ACID_PHOSPHORYLATION	4.8296	0.010585	3
GO VIRAL REPRODUCTIVE PROCESS	Biological process	36	35	http://www.broadinstitute.org/gsea/msigdb/cards/VIRAL_REPRODUCTIVE_PROCESS	4.8229	36.219	2
GO AMINO ACID TRANSMEMBRANE TRANSPORTER ACTIVITY	Molecular function	29	29	http://www.broadinstitute.org/gsea/msigdb/cards/AMINO_ACID_TRANSMEMBRANE_TRANSPORTER_ACTIVITY	4.8201	0.39754	0
KEGG B CELL RECEPTOR SIGNALING PATHWAY	Organismal Systems	75	71	http://www.broadinstitute.org/gsea/msigdb/cards/KEGG_B_CELL_RECEPTOR_SIGNALING_PATHWAY	4.8076	0.025179	19
GO REGULATION OF CELL MIGRATION	Biological process	28	26	http://www.broadinstitute.org/gsea/msigdb/cards/REGULATION_OF_CELL_MIGRATION	4.7363	1.4821	4
GO NUCLEOTIDYLTRANSFERASE ACTIVITY	Molecular function	47	45	http://www.broadinstitute.org/gsea/msigdb/cards/NUCLEOTIDYLTRANSFERASE_ACTIVITY	4.6891	12.96	1
GO EPIDERMIS DEVELOPMENT	Biological process	71	68	http://www.broadinstitute.org/gsea/msigdb/cards/EPIDERMIS_DEVELOPMENT	4.6754	-0.11173	4
GO NEGATIVE REGULATION OF CELLULAR METABOLIC PROCESS	Biological process	259	227	http://www.broadinstitute.org/gsea/msigdb/cards/NEGATIVE_REGULATION_OF_CELLULAR_METABOLIC_PROCESS	4.601	105.67	27
GO PURINE NUCLEOTIDE BINDING	Molecular function	211	191	http://www.broadinstitute.org/gsea/msigdb/cards/PURINE_NUCLEOTIDE_BINDING	4.5649	0.21545	8
BIOCARTA AMI PATHWAY	w	20	19	http://www.broadinstitute.org/gsea/msigdb/cards/BIOCARTA_AMI_PATHWAY	4.5401	1.7576	0
KEGG RENIN ANGIOTENSIN SYSTEM	Organismal Systems	17	16	http://www.broadinstitute.org/gsea/msigdb/cards/KEGG_RENIN_ANGIOTENSIN_SYSTEM	4.5395	-0.64233	0
GO PROTEIN AMINO ACID DEPHOSPHORYLATION	Biological process	63	63	http://www.broadinstitute.org/gsea/msigdb/cards/PROTEIN_AMINO_ACID_DEPHOSPHORYLATION	4.4952	0.8627	2
GO CONTRACTILE FIBER	Cellular component	25	24	http://www.broadinstitute.org/gsea/msigdb/cards/CONTRACTILE_FIBER	4.4868	2.5644	2
KEGG PATHOGENIC ESCHERICHIA COLI INFECTION	Human Diseases	59	43	http://www.broadinstitute.org/gsea/msigdb/cards/KEGG_PATHOGENIC_ESCHERICHIA_COLI_INFECTION	4.4839	15.195	5
GO ACTIVATION OF IMMUNE RESPONSE	Biological process	17	17	http://www.broadinstitute.org/gsea/msigdb/cards/ACTIVATION_OF_IMMUNE_RESPONSE	4.4811	0.00086599	2
GO CHEMICAL HOMEOSTASIS	Biological process	155	142	http://www.broadinstitute.org/gsea/msigdb/cards/CHEMICAL_HOMEOSTASIS	4.4671	-2.0598	3
GO REGULATION OF G PROTEIN COUPLED RECEPTOR PROTEIN SIGNALING PATHWAY	Biological process	23	23	http://www.broadinstitute.org/gsea/msigdb/cards/REGULATION_OF_G_PROTEIN_COUPLED_RECEPTOR_PROTEIN_SIGNALING_PATHWAY	4.4631	2.4758	0
KEGG GLYCOSAMINOGLYCAN BIOSYNTHESIS KERATAN SULFATE	Metabolism	15	15	http://www.broadinstitute.org/gsea/msigdb/cards/KEGG_GLYCOSAMINOGLYCAN_BIOSYNTHESIS_KERATAN_SULFATE	4.4351	4.6384	0
BIOCARTA AT1R PATHWAY	Cell Signaling -Hematopoiesis	36	31	http://www.broadinstitute.org/gsea/msigdb/cards/BIOCARTA_AT1R_PATHWAY	4.4291	-0.18244	9
GO PHOSPHORYLATION	Biological process	313	282	http://www.broadinstitute.org/gsea/msigdb/cards/PHOSPHORYLATION	4.4224	-0.0091227	28
GO NUCLEOTIDE BINDING	Molecular function	224	202	http://www.broadinstitute.org/gsea/msigdb/cards/NUCLEOTIDE_BINDING	4.3722	2.1031	8
KEGG ALPHA LINOLENIC ACID METABOLISM	Metabolism	19	17	http://www.broadinstitute.org/gsea/msigdb/cards/KEGG_ALPHA_LINOLENIC_ACID_METABOLISM	4.3555	-0.54649	0
GO ANTIOXIDANT ACTIVITY	Molecular function	18	17	http://www.broadinstitute.org/gsea/msigdb/cards/ANTIOXIDANT_ACTIVITY	4.3409	0.1307	0
GO PEROXISOME ORGANIZATION AND BIOGENESIS	Biological process	16	15	http://www.broadinstitute.org/gsea/msigdb/cards/PEROXISOME_ORGANIZATION_AND_BIOGENESIS	4.2591	0.26885	0
GO INTRINSIC TO ENDOPLASMIC RETICULUM MEMBRANE	Cellular component	24	21	http://www.broadinstitute.org/gsea/msigdb/cards/INTRINSIC_TO_ENDOPLASMIC_RETICULUM_MEMBRANE	4.2187	-0.54408	1
GO INTEGRAL TO ENDOPLASMIC RETICULUM MEMBRANE	Cellular component	24	21	http://www.broadinstitute.org/gsea/msigdb/cards/INTEGRAL_TO_ENDOPLASMIC_RETICULUM_MEMBRANE	4.2187	-0.54408	1
KEGG DRUG METABOLISM CYTOCHROME P450	Metabolism	72	61	http://www.broadinstitute.org/gsea/msigdb/cards/KEGG_DRUG_METABOLISM_CYTOCHROME_P450	4.2147	-0.70852	0
GO PHOSPHOINOSITIDE METABOLIC PROCESS	Biological process	31	24	http://www.broadinstitute.org/gsea/msigdb/cards/PHOSPHOINOSITIDE_METABOLIC_PROCESS	4.1695	27.433	2
GO SMALL NUCLEAR RIBONUCLEOPROTEIN COMPLEX	Cellular component	22	19	http://www.broadinstitute.org/gsea/msigdb/cards/SMALL_NUCLEAR_RIBONUCLEOPROTEIN_COMPLEX	4.1637	17.996	0
GO PROTEIN CATABOLIC PROCESS	Biological process	69	62	http://www.broadinstitute.org/gsea/msigdb/cards/PROTEIN_CATABOLIC_PROCESS	4.1356	3.2161	2
GO LIGASE ACTIVITY FORMING CARBON NITROGEN BONDS	Molecular function	68	62	http://www.broadinstitute.org/gsea/msigdb/cards/LIGASE_ACTIVITY_FORMING_CARBON_NITROGEN_BONDS	4.1267	-0.088682	7
GO VASCULATURE DEVELOPMENT	Biological process	55	49	http://www.broadinstitute.org/gsea/msigdb/cards/VASCULATURE_DEVELOPMENT	4.0835	-1.3342	5
GO REGULATION OF CYTOKINE BIOSYNTHETIC PROCESS	Biological process	38	36	http://www.broadinstitute.org/gsea/msigdb/cards/REGULATION_OF_CYTOKINE_BIOSYNTHETIC_PROCESS	4.0767	-1.626	3
GO SYNAPTIC TRANSMISSION	Biological process	174	166	http://www.broadinstitute.org/gsea/msigdb/cards/SYNAPTIC_TRANSMISSION	4.0639	6.4298	1
BIOCARTA ALK PATHWAY	Cell Signaling-Developmental Biology - Hematopoiesis	37	36	http://www.broadinstitute.org/gsea/msigdb/cards/BIOCARTA_ALK_PATHWAY	4.0579	3.6575	4
GO SMALL PROTEIN CONJUGATING ENZYME ACTIVITY	Molecular function	52	46	http://www.broadinstitute.org/gsea/msigdb/cards/SMALL_PROTEIN_CONJUGATING_ENZYME_ACTIVITY	4.0352	-0.63092	6
GO MICROTUBULE	Cellular component	32	31	http://www.broadinstitute.org/gsea/msigdb/cards/MICROTUBULE	4.0134	2.0324	1
GO ION HOMEOSTASIS	Biological process	129	117	http://www.broadinstitute.org/gsea/msigdb/cards/ION_HOMEOSTASIS	4.0131	-0.0042748	3
GO OXIDOREDUCTASE ACTIVITY GO 0016705	Molecular function	38	34	http://www.broadinstitute.org/gsea/msigdb/cards/OXIDOREDUCTASE_ACTIVITY_GO_0016705	3.9931	-0.45592	0
GO PROTEIN TYROSINE PHOSPHATASE ACTIVITY	Molecular function	53	53	http://www.broadinstitute.org/gsea/msigdb/cards/PROTEIN_TYROSINE_PHOSPHATASE_ACTIVITY	3.9473	4.2594	2
GO TRANSLATION INITIATION FACTOR ACTIVITY	Molecular function	24	17	http://www.broadinstitute.org/gsea/msigdb/cards/TRANSLATION_INITIATION_FACTOR_ACTIVITY	3.9459	0.77981	1
BIOCARTA UCALPAIN PATHWAY	Adhesion	18	16	http://www.broadinstitute.org/gsea/msigdb/cards/BIOCARTA_UCALPAIN_PATHWAY	3.9217	0.51741	2
GO RESPONSE TO CHEMICAL STIMULUS	Biological process	314	289	http://www.broadinstitute.org/gsea/msigdb/cards/RESPONSE_TO_CHEMICAL_STIMULUS	3.9199	-0.95728	16
GO REGULATION OF PROTEIN AMINO ACID PHOSPHORYLATION	Biological process	30	25	http://www.broadinstitute.org/gsea/msigdb/cards/REGULATION_OF_PROTEIN_AMINO_ACID_PHOSPHORYLATION	3.8959	-1.2761	6
GO SUBSTRATE SPECIFIC CHANNEL ACTIVITY	Molecular function	156	147	http://www.broadinstitute.org/gsea/msigdb/cards/SUBSTRATE_SPECIFIC_CHANNEL_ACTIVITY	3.8699	-22.295	1
GO CYTOKINE METABOLIC PROCESS	Biological process	42	39	http://www.broadinstitute.org/gsea/msigdb/cards/CYTOKINE_METABOLIC_PROCESS	3.8516	-2.9339	3
KEGG HOMOLOGOUS RECOMBINATION	Genetic Information Processing	28	26	http://www.broadinstitute.org/gsea/msigdb/cards/KEGG_HOMOLOGOUS_RECOMBINATION	3.8282	25.052	2
BIOCARTA GSK3 PATHWAY	Cell Signaling – Immunology	27	27	http://www.broadinstitute.org/gsea/msigdb/cards/BIOCARTA_GSK3_PATHWAY	3.7875	0.050259	8
GO RNA SPLICINGVIA TRANSESTERIFICATION REACTIONS	Biological process	35	21	http://www.broadinstitute.org/gsea/msigdb/cards/RNA_SPLICINGVIA_TRANSESTERIFICATION_REACTIONS	3.7753	0.098186	0
GO MICROTUBULE ORGANIZING CENTER PART	Cellular component	19	19	http://www.broadinstitute.org/gsea/msigdb/cards/MICROTUBULE_ORGANIZING_CENTER_PART	3.7349	-0.12275	2
GO HOMEOSTATIC PROCESS	Biological process	207	191	http://www.broadinstitute.org/gsea/msigdb/cards/HOMEOSTATIC_PROCESS	3.6996	-2.2031	10
GO CHROMATIN ASSEMBLY OR DISASSEMBLY	Biological process	26	26	http://www.broadinstitute.org/gsea/msigdb/cards/CHROMATIN_ASSEMBLY_OR_DISASSEMBLY	3.6661	7.6135	4
GO PROTEOGLYCAN METABOLIC PROCESS	Biological process	21	18	http://www.broadinstitute.org/gsea/msigdb/cards/PROTEOGLYCAN_METABOLIC_PROCESS	3.6291	0.9694	1
BIOCARTA MAL PATHWAY	Cell Signaling	19	18	http://www.broadinstitute.org/gsea/msigdb/cards/BIOCARTA_MAL_PATHWAY	3.6227	9.8128	5
GO INORGANIC CATION TRANSMEMBRANE TRANSPORTER ACTIVITY	Molecular function	58	56	http://www.broadinstitute.org/gsea/msigdb/cards/INORGANIC_CATION_TRANSMEMBRANE_TRANSPORTER_ACTIVITY	3.6055	17.665	0
GO PROTEIN AMINO ACID AUTOPHOSPHORYLATION	Biological process	31	27	http://www.broadinstitute.org/gsea/msigdb/cards/PROTEIN_AMINO_ACID_AUTOPHOSPHORYLATION	3.6012	4.3819	2
GO PROGRAMMED CELL DEATH	Biological process	432	396	http://www.broadinstitute.org/gsea/msigdb/cards/PROGRAMMED_CELL_DEATH	3.5797	91.313	38
GO POSITIVE REGULATION OF PHOSPHORYLATION	Biological process	26	23	http://www.broadinstitute.org/gsea/msigdb/cards/POSITIVE_REGULATION_OF_PHOSPHORYLATION	3.5742	-0.9547	5
GO PROTEIN PROCESSING	Biological process	49	44	http://www.broadinstitute.org/gsea/msigdb/cards/PROTEIN_PROCESSING	3.5633	1.8354	2
GO POSITIVE REGULATION OF PHOSPHATE METABOLIC PROCESS	Biological process	28	25	http://www.broadinstitute.org/gsea/msigdb/cards/POSITIVE_REGULATION_OF_PHOSPHATE_METABOLIC_PROCESS	3.5052	-1.4407	5
GO UDP GLYCOSYLTRANSFERASE ACTIVITY	Molecular function	42	37	http://www.broadinstitute.org/gsea/msigdb/cards/UDP_GLYCOSYLTRANSFERASE_ACTIVITY	3.4698	0.39215	1
GO AMINE RECEPTOR ACTIVITY	Molecular function	34	34	http://www.broadinstitute.org/gsea/msigdb/cards/AMINE_RECEPTOR_ACTIVITY	3.4698	-3.654	0
GO ATPASE ACTIVITY COUPLED TO TRANSMEMBRANE MOVEMENT OF IONS	Molecular function	24	22	http://www.broadinstitute.org/gsea/msigdb/cards/ATPASE_ACTIVITY_COUPLED_TO_TRANSMEMBRANE_MOVEMENT_OF_IONS	3.4566	1.3967	0
BIOCARTA FCER1 PATHWAY	Cell Signaling – Immunology	41	37	http://www.broadinstitute.org/gsea/msigdb/cards/BIOCARTA_FCER1_PATHWAY	3.4504	-0.70779	8
KEGG ADIPOCYTOKINE SIGNALING PATHWAY	Organismal Systems	67	66	http://www.broadinstitute.org/gsea/msigdb/cards/KEGG_ADIPOCYTOKINE_SIGNALING_PATHWAY	3.4368	-0.030186	7
BIOCARTA INTEGRIN PATHWAY	Adhesion - Cell Signaling	38	37	http://www.broadinstitute.org/gsea/msigdb/cards/BIOCARTA_INTEGRIN_PATHWAY	3.4316	1.5159	6
GO SEXUAL REPRODUCTION	Biological process	139	121	http://www.broadinstitute.org/gsea/msigdb/cards/SEXUAL_REPRODUCTION	3.4203	-0.0077766	2
GO REGULATION OF MULTICELLULAR ORGANISMAL PROCESS	Biological process	151	143	http://www.broadinstitute.org/gsea/msigdb/cards/REGULATION_OF_MULTICELLULAR_ORGANISMAL_PROCESS	3.4041	-6.0519	5
GO DRUG BINDING	Molecular function	16	15	http://www.broadinstitute.org/gsea/msigdb/cards/DRUG_BINDING	3.3087	1.2214	0
GO INTEGRIN COMPLEX	Cellular component	19	18	http://www.broadinstitute.org/gsea/msigdb/cards/INTEGRIN_COMPLEX	3.3028	1.0899	1
KEGG CELL ADHESION MOLECULES CAMS	Environmental Information Processing	134	125	http://www.broadinstitute.org/gsea/msigdb/cards/KEGG_CELL_ADHESION_MOLECULES_CAMS	3.2942	11.029	3
KEGG TYPE I DIABETES MELLITUS	Human Diseases	44	40	http://www.broadinstitute.org/gsea/msigdb/cards/KEGG_TYPE_I_DIABETES_MELLITUS	3.2633	-0.0056576	2
GO AROMATIC COMPOUND METABOLIC PROCESS	Biological process	27	25	http://www.broadinstitute.org/gsea/msigdb/cards/AROMATIC_COMPOUND_METABOLIC_PROCESS	3.2457	0.28044	1
BIOCARTA TOB1 PATHWAY	Cell Activation – Immunology	21	20	http://www.broadinstitute.org/gsea/msigdb/cards/BIOCARTA_TOB1_PATHWAY	3.2389	1.7522	3
GO CELLULAR CATION HOMEOSTASIS	Biological process	106	96	http://www.broadinstitute.org/gsea/msigdb/cards/CELLULAR_CATION_HOMEOSTASIS	3.2312	-1.0014	3
GO VIRAL INFECTIOUS CYCLE	Biological process	32	31	http://www.broadinstitute.org/gsea/msigdb/cards/VIRAL_INFECTIOUS_CYCLE	3.2153	24.423	2
GO REPLICATION FORK	Cellular component	18	17	http://www.broadinstitute.org/gsea/msigdb/cards/REPLICATION_FORK	3.1912	14.792	1
GO PHOSPHOPROTEIN PHOSPHATASE ACTIVITY	Molecular function	81	79	http://www.broadinstitute.org/gsea/msigdb/cards/PHOSPHOPROTEIN_PHOSPHATASE_ACTIVITY	3.1767	1.0592	3
KEGG O GLYCAN BIOSYNTHESIS	Metabolism	30	29	http://www.broadinstitute.org/gsea/msigdb/cards/KEGG_O_GLYCAN_BIOSYNTHESIS	3.1593	-0.092344	0
GO RAS PROTEIN SIGNAL TRANSDUCTION	Biological process	66	62	http://www.broadinstitute.org/gsea/msigdb/cards/RAS_PROTEIN_SIGNAL_TRANSDUCTION	3.1151	0.022908	5
GO NEGATIVE REGULATION OF METABOLIC PROCESS	Biological process	262	230	http://www.broadinstitute.org/gsea/msigdb/cards/NEGATIVE_REGULATION_OF_METABOLIC_PROCESS	3.1077	111.19	27
GO CARBOHYDRATE BINDING	Molecular function	72	65	http://www.broadinstitute.org/gsea/msigdb/cards/CARBOHYDRATE_BINDING	3.1075	-2.983	0
GO INTRAMOLECULAR OXIDOREDUCTASE ACTIVITY	Molecular function	19	18	http://www.broadinstitute.org/gsea/msigdb/cards/INTRAMOLECULAR_OXIDOREDUCTASE_ACTIVITY	3.0929	0.013242	0
GO APOPTOSIS GO	Biological process	431	395	http://www.broadinstitute.org/gsea/msigdb/cards/APOPTOSIS_GO	3.0851	85.591	38
BIOCARTA PDGF PATHWAY	Cell Signaling-Cytokines/Chemokines	32	31	http://www.broadinstitute.org/gsea/msigdb/cards/BIOCARTA_PDGF_PATHWAY	3.0525	-1.1142	10
GO CYTOKINE BIOSYNTHETIC PROCESS	Biological process	41	38	http://www.broadinstitute.org/gsea/msigdb/cards/CYTOKINE_BIOSYNTHETIC_PROCESS	3.0229	-2.1114	3
KEGG PANCREATIC CANCER	Human Diseases	70	69	http://www.broadinstitute.org/gsea/msigdb/cards/KEGG_PANCREATIC_CANCER	2.9973	5.6373	21
BIOCARTA AGR PATHWAY	Cell Signaling-Developmental Biology	36	35	http://www.broadinstitute.org/gsea/msigdb/cards/BIOCARTA_AGR_PATHWAY	2.9954	1.7254	3
GO PROTEIN KINASE CASCADE	Biological process	293	273	http://www.broadinstitute.org/gsea/msigdb/cards/PROTEIN_KINASE_CASCADE	2.9921	-0.012442	19
GO AMINE TRANSPORT	Biological process	38	38	http://www.broadinstitute.org/gsea/msigdb/cards/AMINE_TRANSPORT	2.9878	-0.028775	0
GO INTRACELLULAR TRANSPORT	Biological process	280	255	http://www.broadinstitute.org/gsea/msigdb/cards/INTRACELLULAR_TRANSPORT	2.9768	-0.07927	19
KEGG ACUTE MYELOID LEUKEMIA	Human Diseases	60	56	http://www.broadinstitute.org/gsea/msigdb/cards/KEGG_ACUTE_MYELOID_LEUKEMIA	2.9592	-0.08594	22
GO NITROGEN COMPOUND CATABOLIC PROCESS	Biological process	29	26	http://www.broadinstitute.org/gsea/msigdb/cards/NITROGEN_COMPOUND_CATABOLIC_PROCESS	2.9572	18.473	0
GO SMALL GTPASE REGULATOR ACTIVITY	Molecular function	67	57	http://www.broadinstitute.org/gsea/msigdb/cards/SMALL_GTPASE_REGULATOR_ACTIVITY	2.9561	1.6227	3
BIOCARTA BCR PATHWAY	Cell Signaling – Immunology	37	33	http://www.broadinstitute.org/gsea/msigdb/cards/BIOCARTA_BCR_PATHWAY	2.9511	-0.017039	8
GO RECEPTOR SIGNALING PROTEIN SERINE THREONINE KINASE ACTIVITY	Molecular function	34	34	http://www.broadinstitute.org/gsea/msigdb/cards/RECEPTOR_SIGNALING_PROTEIN_SERINE_THREONINE_KINASE_ACTIVITY	2.9336	5.3634	0
KEGG ALDOSTERONE REGULATED SODIUM REABSORPTION	Organismal Systems	42	40	http://www.broadinstitute.org/gsea/msigdb/cards/KEGG_ALDOSTERONE_REGULATED_SODIUM_REABSORPTION	2.9328	13.17	3
KEGG PROGESTERONE MEDIATED OOCYTE MATURATION	Organismal Systems	86	82	http://www.broadinstitute.org/gsea/msigdb/cards/KEGG_PROGESTERONE_MEDIATED_OOCYTE_MATURATION	2.9221	-0.0022212	8
GO MYELOID CELL DIFFERENTIATION	Biological process	37	34	http://www.broadinstitute.org/gsea/msigdb/cards/MYELOID_CELL_DIFFERENTIATION	2.8852	2.7399	4
GO NITROGEN COMPOUND METABOLIC PROCESS	Biological process	155	147	http://www.broadinstitute.org/gsea/msigdb/cards/NITROGEN_COMPOUND_METABOLIC_PROCESS	2.8629	8.446	4
GO ADHERENS JUNCTION	Cellular component	23	21	http://www.broadinstitute.org/gsea/msigdb/cards/ADHERENS_JUNCTION	2.8494	1.2509	1
GO ANATOMICAL STRUCTURE MORPHOGENESIS	Biological process	376	352	http://www.broadinstitute.org/gsea/msigdb/cards/ANATOMICAL_STRUCTURE_MORPHOGENESIS	2.8147	3.0651	28
GO CELL ACTIVATION	Biological process	77	71	http://www.broadinstitute.org/gsea/msigdb/cards/CELL_ACTIVATION	2.791	-0.049872	4
GO RHYTHMIC PROCESS	Biological process	29	24	http://www.broadinstitute.org/gsea/msigdb/cards/RHYTHMIC_PROCESS	2.7835	0.0057998	2
BIOCARTA RAS PATHWAY	Cell Signaling	23	22	http://www.broadinstitute.org/gsea/msigdb/cards/BIOCARTA_RAS_PATHWAY	2.782	7.8708	8
KEGG PENTOSE PHOSPHATE PATHWAY	Metabolism	27	26	http://www.broadinstitute.org/gsea/msigdb/cards/KEGG_PENTOSE_PHOSPHATE_PATHWAY	2.7739	-0.0034647	0
GO ORGANIC ACID TRANSPORT	Biological process	42	42	http://www.broadinstitute.org/gsea/msigdb/cards/ORGANIC_ACID_TRANSPORT	2.7642	0.31742	0
GO NUCLEAR CHROMOSOME PART	Cellular component	34	31	http://www.broadinstitute.org/gsea/msigdb/cards/NUCLEAR_CHROMOSOME_PART	2.7498	13.387	2
GO CALCIUM INDEPENDENT CELL CELL ADHESION	Biological process	22	21	http://www.broadinstitute.org/gsea/msigdb/cards/CALCIUM_INDEPENDENT_CELL_CELL_ADHESION	2.7356	1.0225	0
GO PHOSPHOINOSITIDE BIOSYNTHETIC PROCESS	Biological process	24	20	http://www.broadinstitute.org/gsea/msigdb/cards/PHOSPHOINOSITIDE_BIOSYNTHETIC_PROCESS	2.7308	12.194	0
GO CATION HOMEOSTASIS	Biological process	109	99	http://www.broadinstitute.org/gsea/msigdb/cards/CATION_HOMEOSTASIS	2.7044	-0.63312	3
GO GLYCOSAMINOGLYCAN BINDING	Molecular function	34	29	http://www.broadinstitute.org/gsea/msigdb/cards/GLYCOSAMINOGLYCAN_BINDING	2.688	-0.37338	0
GO GLUTATHIONE TRANSFERASE ACTIVITY	Molecular function	15	15	http://www.broadinstitute.org/gsea/msigdb/cards/GLUTATHIONE_TRANSFERASE_ACTIVITY	2.6701	-0.089025	0
GO NUCLEOTIDE BIOSYNTHETIC PROCESS	Biological process	20	18	http://www.broadinstitute.org/gsea/msigdb/cards/NUCLEOTIDE_BIOSYNTHETIC_PROCESS	2.6457	2.4051	0
GO REGULATION OF MYELOID CELL DIFFERENTIATION	Biological process	19	18	http://www.broadinstitute.org/gsea/msigdb/cards/REGULATION_OF_MYELOID_CELL_DIFFERENTIATION	2.6054	1.3885	3
GO REGULATION OF PROTEIN METABOLIC PROCESS	Biological process	173	150	http://www.broadinstitute.org/gsea/msigdb/cards/REGULATION_OF_PROTEIN_METABOLIC_PROCESS	2.5827	-0.1164	16
KEGG GLYCOSYLPHOSPHATIDYLINOSITOL GPI ANCHOR BIOSYNTHESIS	Metabolism	25	24	http://www.broadinstitute.org/gsea/msigdb/cards/KEGG_GLYCOSYLPHOSPHATIDYLINOSITOL_GPI_ANCHOR_BIOSYNTHESIS	2.5719	9.8595	0
GO NUCLEOBASENUCLEOSIDE AND NUCLEOTIDE METABOLIC PROCESS	Biological process	52	48	http://www.broadinstitute.org/gsea/msigdb/cards/NUCLEOBASENUCLEOSIDE_AND_NUCLEOTIDE_METABOLIC_PROCESS	2.57	4.0889	2
GO PATTERN BINDING	Molecular function	45	37	http://www.broadinstitute.org/gsea/msigdb/cards/PATTERN_BINDING	2.5544	-0.061299	0
GO METALLOENDOPEPTIDASE ACTIVITY	Molecular function	27	26	http://www.broadinstitute.org/gsea/msigdb/cards/METALLOENDOPEPTIDASE_ACTIVITY	2.5375	0.00054974	0
GO GLUCOSE METABOLIC PROCESS	Biological process	28	27	http://www.broadinstitute.org/gsea/msigdb/cards/GLUCOSE_METABOLIC_PROCESS	2.537	5.8581	0
GO ANATOMICAL STRUCTURE FORMATION	Biological process	56	50	http://www.broadinstitute.org/gsea/msigdb/cards/ANATOMICAL_STRUCTURE_FORMATION	2.5364	-1.3127	6
GO MACROMOLECULE CATABOLIC PROCESS	Biological process	137	127	http://www.broadinstitute.org/gsea/msigdb/cards/MACROMOLECULE_CATABOLIC_PROCESS	2.5307	0.18582	8
GO COATED VESICLE	Cellular component	47	41	http://www.broadinstitute.org/gsea/msigdb/cards/COATED_VESICLE	2.5298	-0.75806	2
GO CELLULAR PROTEIN CATABOLIC PROCESS	Biological process	58	53	http://www.broadinstitute.org/gsea/msigdb/cards/CELLULAR_PROTEIN_CATABOLIC_PROCESS	2.522	0.90106	0
GO CONDENSED NUCLEAR CHROMOSOME	Cellular component	18	16	http://www.broadinstitute.org/gsea/msigdb/cards/CONDENSED_NUCLEAR_CHROMOSOME	2.5146	4.1791	0
GO N ACETYLTRANSFERASE ACTIVITY	Molecular function	21	17	http://www.broadinstitute.org/gsea/msigdb/cards/N_ACETYLTRANSFERASE_ACTIVITY	2.5017	0.061184	4
GO PURINE RIBONUCLEOTIDE BINDING	Molecular function	205	187	http://www.broadinstitute.org/gsea/msigdb/cards/PURINE_RIBONUCLEOTIDE_BINDING	2.4984	0.13489	8
GO CARBOXYLIC ACID TRANSPORT	Biological process	41	41	http://www.broadinstitute.org/gsea/msigdb/cards/CARBOXYLIC_ACID_TRANSPORT	2.4944	1.3174	0
GO GROWTH	Biological process	77	67	http://www.broadinstitute.org/gsea/msigdb/cards/GROWTH	2.4817	0.0032218	8
KEGG ABC TRANSPORTERS	Environmental Information Processing	44	44	http://www.broadinstitute.org/gsea/msigdb/cards/KEGG_ABC_TRANSPORTERS	2.4711	-0.33156	0
GO SULFOTRANSFERASE ACTIVITY	Molecular function	28	25	http://www.broadinstitute.org/gsea/msigdb/cards/SULFOTRANSFERASE_ACTIVITY	2.4642	12.227	0
GO TUBULIN BINDING	Molecular function	47	42	http://www.broadinstitute.org/gsea/msigdb/cards/TUBULIN_BINDING	2.4466	2.3468	4
GO TUBE MORPHOGENESIS	Biological process	15	15	http://www.broadinstitute.org/gsea/msigdb/cards/TUBE_MORPHOGENESIS	2.4385	0.13556	1
GO HYDROLASE ACTIVITY ACTING ON CARBON NITROGEN NOT PEPTIDEBONDSIN LINEAR AMIDES	Molecular function	21	19	http://www.broadinstitute.org/gsea/msigdb/cards/HYDROLASE_ACTIVITY_ACTING_ON_CARBON_NITROGEN_NOT_PEPTIDEBONDSIN_LINEAR_AMIDES	2.4327	9.7438	0
GO INTERMEDIATE FILAMENT CYTOSKELETON	Cellular component	24	21	http://www.broadinstitute.org/gsea/msigdb/cards/INTERMEDIATE_FILAMENT_CYTOSKELETON	2.4305	-1.0134	0
GO INTERMEDIATE FILAMENT	Cellular component	24	21	http://www.broadinstitute.org/gsea/msigdb/cards/INTERMEDIATE_FILAMENT	2.4305	-1.0134	0
GO MITOCHONDRIAL TRANSPORT	Biological process	21	19	http://www.broadinstitute.org/gsea/msigdb/cards/MITOCHONDRIAL_TRANSPORT	2.428	1.4059	2
KEGG SELENOAMINO ACID METABOLISM	Metabolism	26	21	http://www.broadinstitute.org/gsea/msigdb/cards/KEGG_SELENOAMINO_ACID_METABOLISM	2.4183	-0.83587	0
GO CELLULAR MACROMOLECULE CATABOLIC PROCESS	Biological process	104	97	http://www.broadinstitute.org/gsea/msigdb/cards/CELLULAR_MACROMOLECULE_CATABOLIC_PROCESS	2.4099	-0.31748	0
GO CELLULAR HOMEOSTASIS	Biological process	147	133	http://www.broadinstitute.org/gsea/msigdb/cards/CELLULAR_HOMEOSTASIS	2.3824	-1.5377	4
GO ENDOSOME	Cellular component	67	57	http://www.broadinstitute.org/gsea/msigdb/cards/ENDOSOME	2.36	2.1928	4
GO ATPASE ACTIVITY COUPLED TO TRANSMEMBRANE MOVEMENT OF IONS PHOSPHORYLATIVE MECHANISM	Molecular function	20	19	http://www.broadinstitute.org/gsea/msigdb/cards/ATPASE_ACTIVITY_COUPLED_TO_TRANSMEMBRANE_MOVEMENT_OF_IONS_PHOSPHORYLATIVE_MECHANISM	2.2962	-0.19083	0
GO TRANSMEMBRANE RECEPTOR PROTEIN SERINE THREONINE KINASE SIGNALING PATHWAY	Biological process	47	45	http://www.broadinstitute.org/gsea/msigdb/cards/TRANSMEMBRANE_RECEPTOR_PROTEIN_SERINE_THREONINE_KINASE_SIGNALING_PATHWAY	2.2626	7.8174	1
GO HEMOSTASIS	Biological process	48	46	http://www.broadinstitute.org/gsea/msigdb/cards/HEMOSTASIS	2.2307	0.30141	3
GO PEPTIDYL AMINO ACID MODIFICATION	Biological process	63	53	http://www.broadinstitute.org/gsea/msigdb/cards/PEPTIDYL_AMINO_ACID_MODIFICATION	2.209	-0.51508	9
GO MACROMOLECULE LOCALIZATION	Biological process	235	207	http://www.broadinstitute.org/gsea/msigdb/cards/MACROMOLECULE_LOCALIZATION	2.1875	0.10368	16
GO POSITIVE REGULATION OF PROTEIN METABOLIC PROCESS	Biological process	75	70	http://www.broadinstitute.org/gsea/msigdb/cards/POSITIVE_REGULATION_OF_PROTEIN_METABOLIC_PROCESS	2.1786	-3.2419	7
BIOCARTA NFAT PATHWAY	Expression-Cell Signaling	56	53	http://www.broadinstitute.org/gsea/msigdb/cards/BIOCARTA_NFAT_PATHWAY	2.15	-1.8864	8
GO NEGATIVE REGULATION OF DEVELOPMENTAL PROCESS	Biological process	197	181	http://www.broadinstitute.org/gsea/msigdb/cards/NEGATIVE_REGULATION_OF_DEVELOPMENTAL_PROCESS	2.1381	1.2838	17
KEGG BASAL CELL CARCINOMA	Human Diseases	55	53	http://www.broadinstitute.org/gsea/msigdb/cards/KEGG_BASAL_CELL_CARCINOMA	2.1366	0.37908	7
BIOCARTA KERATINOCYTE PATHWAY	Cell Signaling-Developmental Biology	46	44	http://www.broadinstitute.org/gsea/msigdb/cards/BIOCARTA_KERATINOCYTE_PATHWAY	2.1324	0.78705	9
GO RUFFLE	Cellular component	31	26	http://www.broadinstitute.org/gsea/msigdb/cards/RUFFLE	2.1308	2.192	3
GO GAMETE GENERATION	Biological process	114	100	http://www.broadinstitute.org/gsea/msigdb/cards/GAMETE_GENERATION	2.1279	0.015229	2
GO REGULATION OF MUSCLE CONTRACTION	Biological process	19	18	http://www.broadinstitute.org/gsea/msigdb/cards/REGULATION_OF_MUSCLE_CONTRACTION	2.1238	0.63034	0
GO PHOSPHORIC ESTER HYDROLASE ACTIVITY	Molecular function	153	145	http://www.broadinstitute.org/gsea/msigdb/cards/PHOSPHORIC_ESTER_HYDROLASE_ACTIVITY	2.121	-1.4947	4
GO IMMUNE SYSTEM DEVELOPMENT	Biological process	81	76	http://www.broadinstitute.org/gsea/msigdb/cards/IMMUNE_SYSTEM_DEVELOPMENT	2.0952	-0.24663	10
GO ANGIOGENESIS	Biological process	48	42	http://www.broadinstitute.org/gsea/msigdb/cards/ANGIOGENESIS	2.0931	-1.5098	5
GO G PROTEIN SIGNALING ADENYLATE CYCLASE ACTIVATING PATHWAY	Biological process	25	25	http://www.broadinstitute.org/gsea/msigdb/cards/G_PROTEIN_SIGNALING_ADENYLATE_CYCLASE_ACTIVATING_PATHWAY	2.0869	0.72339	1
GO CARBOHYDRATE TRANSMEMBRANE TRANSPORTER ACTIVITY	Molecular function	16	16	http://www.broadinstitute.org/gsea/msigdb/cards/CARBOHYDRATE_TRANSMEMBRANE_TRANSPORTER_ACTIVITY	2.0744	0.37173	0
GO CENTROSOME	Cellular component	58	49	http://www.broadinstitute.org/gsea/msigdb/cards/CENTROSOME	2.0676	0.17758	7
GO SODIUM CHANNEL ACTIVITY	Molecular function	17	16	http://www.broadinstitute.org/gsea/msigdb/cards/SODIUM_CHANNEL_ACTIVITY	2.0502	-1.344	0
GO POSITIVE REGULATION OF LYMPHOCYTE ACTIVATION	Biological process	24	24	http://www.broadinstitute.org/gsea/msigdb/cards/POSITIVE_REGULATION_OF_LYMPHOCYTE_ACTIVATION	2.0076	-0.037363	1
KEGG DILATED CARDIOMYOPATHY	Human Diseases	92	89	http://www.broadinstitute.org/gsea/msigdb/cards/KEGG_DILATED_CARDIOMYOPATHY	2.0045	4.0117	3
GO KINASE INHIBITOR ACTIVITY	Molecular function	25	25	http://www.broadinstitute.org/gsea/msigdb/cards/KINASE_INHIBITOR_ACTIVITY	1.9916	-0.16593	3
BIOCARTA EGF PATHWAY	Cell Signaling	31	30	http://www.broadinstitute.org/gsea/msigdb/cards/BIOCARTA_EGF_PATHWAY	1.9899	-1.4049	10
GO TRANSFERASE ACTIVITY TRANSFERRING SULFUR CONTAINING GROUPS	Molecular function	32	29	http://www.broadinstitute.org/gsea/msigdb/cards/TRANSFERASE_ACTIVITY_TRANSFERRING_SULFUR_CONTAINING_GROUPS	1.9832	7.4813	0
GO ORGANELLE LOCALIZATION	Biological process	25	23	http://www.broadinstitute.org/gsea/msigdb/cards/ORGANELLE_LOCALIZATION	1.9828	2.7679	2
KEGG GLIOMA	Human Diseases	65	63	http://www.broadinstitute.org/gsea/msigdb/cards/KEGG_GLIOMA	1.9703	0.2155	23
GO LIPID BIOSYNTHETIC PROCESS	Biological process	97	87	http://www.broadinstitute.org/gsea/msigdb/cards/LIPID_BIOSYNTHETIC_PROCESS	1.9701	0.52808	2
KEGG TYROSINE METABOLISM	Metabolism	42	39	http://www.broadinstitute.org/gsea/msigdb/cards/KEGG_TYROSINE_METABOLISM	1.9628	1.6191	0
GO CELLULAR LOCALIZATION	Biological process	371	334	http://www.broadinstitute.org/gsea/msigdb/cards/CELLULAR_LOCALIZATION	1.959	-0.023519	22
BIOCARTA CD40 PATHWAY	Cytokines/Chemokines-Immunology	15	15	http://www.broadinstitute.org/gsea/msigdb/cards/BIOCARTA_CD40_PATHWAY	1.9571	0.027359	1
BIOCARTA STEM PATHWAY	Cytokines/Chemokines-Hematopoiesis	15	15	http://www.broadinstitute.org/gsea/msigdb/cards/BIOCARTA_STEM_PATHWAY	1.9553	-0.34345	1
GO CELL CORTEX	Cellular component	39	37	http://www.broadinstitute.org/gsea/msigdb/cards/CELL_CORTEX	1.9168	-0.21631	4
GO BIOPOLYMER CATABOLIC PROCESS	Biological process	117	107	http://www.broadinstitute.org/gsea/msigdb/cards/BIOPOLYMER_CATABOLIC_PROCESS	1.9165	1.4576	8
GO TRANSFERASE ACTIVITY TRANSFERRING GROUPS OTHER THAN AMINO ACYL GROUPS	Molecular function	49	39	http://www.broadinstitute.org/gsea/msigdb/cards/TRANSFERASE_ACTIVITY_TRANSFERRING_GROUPS_OTHER_THAN_AMINO_ACYL_GROUPS	1.8963	9.1568	5
GO PROTEIN DOMAIN SPECIFIC BINDING	Molecular function	72	63	http://www.broadinstitute.org/gsea/msigdb/cards/PROTEIN_DOMAIN_SPECIFIC_BINDING	1.8925	-0.37831	7
GO POSITIVE REGULATION OF TRANSPORT	Biological process	23	21	http://www.broadinstitute.org/gsea/msigdb/cards/POSITIVE_REGULATION_OF_TRANSPORT	1.865	-0.28346	3
GO POLYSACCHARIDE BINDING	Molecular function	36	31	http://www.broadinstitute.org/gsea/msigdb/cards/POLYSACCHARIDE_BINDING	1.8593	-0.089176	0
KEGG AXON GUIDANCE	Organismal Systems	129	127	http://www.broadinstitute.org/gsea/msigdb/cards/KEGG_AXON_GUIDANCE	1.859	2.4326	8
KEGG BLADDER CANCER	Human Diseases	42	40	http://www.broadinstitute.org/gsea/msigdb/cards/KEGG_BLADDER_CANCER	1.858	22.252	18
KEGG GRAFT VERSUS HOST DISEASE	Human Diseases	42	37	http://www.broadinstitute.org/gsea/msigdb/cards/KEGG_GRAFT_VERSUS_HOST_DISEASE	1.8447	-0.010029	2
BIOCARTA G1 PATHWAY	Cell Cycle Regulation	28	26	http://www.broadinstitute.org/gsea/msigdb/cards/BIOCARTA_G1_PATHWAY	1.8353	2.8111	9
GO DEVELOPMENT OF PRIMARY SEXUAL CHARACTERISTICS	Biological process	26	26	http://www.broadinstitute.org/gsea/msigdb/cards/DEVELOPMENT_OF_PRIMARY_SEXUAL_CHARACTERISTICS	1.8089	0.0038717	2
KEGG OOCYTE MEIOSIS	Cellular Processes	114	106	http://www.broadinstitute.org/gsea/msigdb/cards/KEGG_OOCYTE_MEIOSIS	1.7926	6.3124	4
GO FEMALE GAMETE GENERATION	Biological process	17	16	http://www.broadinstitute.org/gsea/msigdb/cards/FEMALE_GAMETE_GENERATION	1.7884	-0.15287	1
GO MEMBRANE LIPID BIOSYNTHETIC PROCESS	Biological process	49	40	http://www.broadinstitute.org/gsea/msigdb/cards/MEMBRANE_LIPID_BIOSYNTHETIC_PROCESS	1.7723	4.2475	0
GO MICROTUBULE ORGANIZING CENTER	Cellular component	67	57	http://www.broadinstitute.org/gsea/msigdb/cards/MICROTUBULE_ORGANIZING_CENTER	1.7555	0.34703	7
GO GROWTH FACTOR BINDING	Molecular function	32	32	http://www.broadinstitute.org/gsea/msigdb/cards/GROWTH_FACTOR_BINDING	1.7462	2.3234	4
GO CALCIUM MEDIATED SIGNALING	Biological process	16	15	http://www.broadinstitute.org/gsea/msigdb/cards/CALCIUM_MEDIATED_SIGNALING	1.7217	0.081343	1
GO ACTIN CYTOSKELETON ORGANIZATION AND BIOGENESIS	Biological process	105	98	http://www.broadinstitute.org/gsea/msigdb/cards/ACTIN_CYTOSKELETON_ORGANIZATION_AND_BIOGENESIS	1.7164	4.5414	8
GO TRANSCRIPTION REPRESSOR ACTIVITY	Molecular function	152	131	http://www.broadinstitute.org/gsea/msigdb/cards/TRANSCRIPTION_REPRESSOR_ACTIVITY	1.7148	51.147	10
GO AMINO ACID METABOLIC PROCESS	Biological process	78	73	http://www.broadinstitute.org/gsea/msigdb/cards/AMINO_ACID_METABOLIC_PROCESS	1.6905	0.0055377	0
GO POSITIVE REGULATION OF CELLULAR PROTEIN METABOLIC PROCESS	Biological process	73	68	http://www.broadinstitute.org/gsea/msigdb/cards/POSITIVE_REGULATION_OF_CELLULAR_PROTEIN_METABOLIC_PROCESS	1.6851	-3.3405	7
GO NEGATIVE REGULATION OF GROWTH	Biological process	40	36	http://www.broadinstitute.org/gsea/msigdb/cards/NEGATIVE_REGULATION_OF_GROWTH	1.6799	1.9055	6
GO REGULATION OF GROWTH	Biological process	58	52	http://www.broadinstitute.org/gsea/msigdb/cards/REGULATION_OF_GROWTH	1.6696	0.30834	7
KEGG RENAL CELL CARCINOMA	Human Diseases	70	69	http://www.broadinstitute.org/gsea/msigdb/cards/KEGG_RENAL_CELL_CARCINOMA	1.6568	3.9204	21
GO REGULATION OF BODY FLUID LEVELS	Biological process	57	55	http://www.broadinstitute.org/gsea/msigdb/cards/REGULATION_OF_BODY_FLUID_LEVELS	1.6547	0.022493	3
GO REGULATION OF ANATOMICAL STRUCTURE MORPHOGENESIS	Biological process	25	23	http://www.broadinstitute.org/gsea/msigdb/cards/REGULATION_OF_ANATOMICAL_STRUCTURE_MORPHOGENESIS	1.634	0.049393	1
GO PROTEIN KINASE INHIBITOR ACTIVITY	Molecular function	24	24	http://www.broadinstitute.org/gsea/msigdb/cards/PROTEIN_KINASE_INHIBITOR_ACTIVITY	1.6192	-0.091491	3
GO PRIMARY ACTIVE TRANSMEMBRANE TRANSPORTER ACTIVITY	Molecular function	40	38	http://www.broadinstitute.org/gsea/msigdb/cards/PRIMARY_ACTIVE_TRANSMEMBRANE_TRANSPORTER_ACTIVITY	1.589	0.65774	0
GO SENSORY PERCEPTION OF CHEMICAL STIMULUS	Biological process	20	16	http://www.broadinstitute.org/gsea/msigdb/cards/SENSORY_PERCEPTION_OF_CHEMICAL_STIMULUS	1.5824	-0.13529	1
GO HETEROCYCLE METABOLIC PROCESS	Biological process	27	25	http://www.broadinstitute.org/gsea/msigdb/cards/HETEROCYCLE_METABOLIC_PROCESS	1.5767	0.33054	1
GO SECRETORY GRANULE	Cellular component	18	18	http://www.broadinstitute.org/gsea/msigdb/cards/SECRETORY_GRANULE	1.5688	11.044	1
GO GOLGI APPARATUS PART	Cellular component	100	85	http://www.broadinstitute.org/gsea/msigdb/cards/GOLGI_APPARATUS_PART	1.5589	0.95419	5
KEGG TERPENOID BACKBONE BIOSYNTHESIS	Metabolism	15	15	http://www.broadinstitute.org/gsea/msigdb/cards/KEGG_TERPENOID_BACKBONE_BIOSYNTHESIS	1.5441	-0.69957	0
GO HYDROLASE ACTIVITY ACTING ON ACID ANHYDRIDESCATALYZING TRANSMEMBRANE MOVEMENT OF SUBSTANCES	Molecular function	39	37	http://www.broadinstitute.org/gsea/msigdb/cards/HYDROLASE_ACTIVITY_ACTING_ON_ACID_ANHYDRIDESCATALYZING_TRANSMEMBRANE_MOVEMENT_OF_SUBSTANCES	1.5324	0.69509	0
GO ELECTRON TRANSPORT GO 0006118	Biological process	51	50	http://www.broadinstitute.org/gsea/msigdb/cards/ELECTRON_TRANSPORT_GO_0006118	1.5271	-0.99199	1
GO MAPKKK CASCADE GO 0000165	Biological process	104	98	http://www.broadinstitute.org/gsea/msigdb/cards/MAPKKK_CASCADE_GO_0000165	1.5161	-0.29461	6
GO ESTABLISHMENT OF ORGANELLE LOCALIZATION	Biological process	18	16	http://www.broadinstitute.org/gsea/msigdb/cards/ESTABLISHMENT_OF_ORGANELLE_LOCALIZATION	1.5124	5.228	0
KEGG ARACHIDONIC ACID METABOLISM	Metabolism	58	51	http://www.broadinstitute.org/gsea/msigdb/cards/KEGG_ARACHIDONIC_ACID_METABOLISM	1.5	0.33275	0
GO GOLGI ASSOCIATED VESICLE	Cellular component	29	23	http://www.broadinstitute.org/gsea/msigdb/cards/GOLGI_ASSOCIATED_VESICLE	1.4879	-0.087664	1
GO REGULATION OF CELLULAR PROTEIN METABOLIC PROCESS	Biological process	162	139	http://www.broadinstitute.org/gsea/msigdb/cards/REGULATION_OF_CELLULAR_PROTEIN_METABOLIC_PROCESS	1.478	-0.6762	14
GO POSITIVE REGULATION OF CELL DIFFERENTIATION	Biological process	25	21	http://www.broadinstitute.org/gsea/msigdb/cards/POSITIVE_REGULATION_OF_CELL_DIFFERENTIATION	1.4733	0.11041	3
BIOCARTA TNFR1 PATHWAY	Apoptosis - Cell Signaling-Cytokines/Chemokines	29	29	http://www.broadinstitute.org/gsea/msigdb/cards/BIOCARTA_TNFR1_PATHWAY	1.4488	0.026997	3
GO BLOOD COAGULATION	Biological process	43	41	http://www.broadinstitute.org/gsea/msigdb/cards/BLOOD_COAGULATION	1.4477	0.17122	2
BIOCARTA GPCR PATHWAY	Cell Signaling-Cytokines/Chemokines	37	33	http://www.broadinstitute.org/gsea/msigdb/cards/BIOCARTA_GPCR_PATHWAY	1.4425	-1.6427	8
GO POSITIVE REGULATION OF T CELL ACTIVATION	Biological process	21	21	http://www.broadinstitute.org/gsea/msigdb/cards/POSITIVE_REGULATION_OF_T_CELL_ACTIVATION	1.4375	0.0025199	1
GO REGULATION OF PROGRAMMED CELL DEATH	Biological process	342	312	http://www.broadinstitute.org/gsea/msigdb/cards/REGULATION_OF_PROGRAMMED_CELL_DEATH	1.4045	19.225	33
BIOCARTA IL10 PATHWAY	Cell Signaling-Cytokines/Chemokines-Immunology	17	17	http://www.broadinstitute.org/gsea/msigdb/cards/BIOCARTA_IL10_PATHWAY	1.3988	-0.022825	2
GO RESPONSE TO NUTRIENT	Biological process	17	16	http://www.broadinstitute.org/gsea/msigdb/cards/RESPONSE_TO_NUTRIENT	1.3983	-0.0032851	1
GO RESPONSE TO HYPOXIA	Biological process	28	25	http://www.broadinstitute.org/gsea/msigdb/cards/RESPONSE_TO_HYPOXIA	1.3699	-0.15107	4
GO STEROID METABOLIC PROCESS	Biological process	71	65	http://www.broadinstitute.org/gsea/msigdb/cards/STEROID_METABOLIC_PROCESS	1.3573	-0.98433	0
BIOCARTA G2 PATHWAY	Cell Cycle Regulation	24	23	http://www.broadinstitute.org/gsea/msigdb/cards/BIOCARTA_G2_PATHWAY	1.3468	49.201	6
GO REGULATION OF LYMPHOCYTE ACTIVATION	Biological process	35	35	http://www.broadinstitute.org/gsea/msigdb/cards/REGULATION_OF_LYMPHOCYTE_ACTIVATION	1.3282	-1.9748	1
GO CHROMATIN REMODELING COMPLEX	Cellular component	17	17	http://www.broadinstitute.org/gsea/msigdb/cards/CHROMATIN_REMODELING_COMPLEX	1.3212	1.4414	2
GO ION CHANNEL ACTIVITY	Molecular function	149	140	http://www.broadinstitute.org/gsea/msigdb/cards/ION_CHANNEL_ACTIVITY	1.3197	-22.081	1
GO PHOSPHATASE REGULATOR ACTIVITY	Molecular function	26	26	http://www.broadinstitute.org/gsea/msigdb/cards/PHOSPHATASE_REGULATOR_ACTIVITY	1.3157	-0.50981	2
BIOCARTA RAC1 PATHWAY	Cell Signaling – Neuroscience	23	23	http://www.broadinstitute.org/gsea/msigdb/cards/BIOCARTA_RAC1_PATHWAY	1.3131	-1.5494	5
GO COAGULATION	Biological process	44	42	http://www.broadinstitute.org/gsea/msigdb/cards/COAGULATION	1.2991	-9.23e-05	2
GO POSITIVE REGULATION OF PROTEIN MODIFICATION PROCESS	Biological process	29	27	http://www.broadinstitute.org/gsea/msigdb/cards/POSITIVE_REGULATION_OF_PROTEIN_MODIFICATION_PROCESS	1.2944	-0.057548	5
BIOCARTA MET PATHWAY	Cell Signaling	37	36	http://www.broadinstitute.org/gsea/msigdb/cards/BIOCARTA_MET_PATHWAY	1.2805	0.00096841	11
GO CELL MATRIX ADHESION	Biological process	38	36	http://www.broadinstitute.org/gsea/msigdb/cards/CELL_MATRIX_ADHESION	1.2643	-0.22703	6
GO INTRINSIC TO ORGANELLE MEMBRANE	Cellular component	52	44	http://www.broadinstitute.org/gsea/msigdb/cards/INTRINSIC_TO_ORGANELLE_MEMBRANE	1.2627	0.040053	2
GO ESTABLISHMENT OF CELLULAR LOCALIZATION	Biological process	353	317	http://www.broadinstitute.org/gsea/msigdb/cards/ESTABLISHMENT_OF_CELLULAR_LOCALIZATION	1.2612	-0.066231	19
KEGG PRIMARY IMMUNODEFICIENCY	Human Diseases	35	35	http://www.broadinstitute.org/gsea/msigdb/cards/KEGG_PRIMARY_IMMUNODEFICIENCY	1.2518	-0.00013809	5
GO ZINC ION BINDING	Molecular function	90	87	http://www.broadinstitute.org/gsea/msigdb/cards/ZINC_ION_BINDING	1.2493	39.824	6
GO ATPASE ACTIVITY COUPLED TO MOVEMENT OF SUBSTANCES	Molecular function	40	38	http://www.broadinstitute.org/gsea/msigdb/cards/ATPASE_ACTIVITY_COUPLED_TO_MOVEMENT_OF_SUBSTANCES	1.2475	0.87133	0
GO REGULATION OF PROTEIN MODIFICATION PROCESS	Biological process	44	39	http://www.broadinstitute.org/gsea/msigdb/cards/REGULATION_OF_PROTEIN_MODIFICATION_PROCESS	1.243	-1.7036	10
KEGG FC EPSILON RI SIGNALING PATHWAY	Organismal Systems	79	75	http://www.broadinstitute.org/gsea/msigdb/cards/KEGG_FC_EPSILON_RI_SIGNALING_PATHWAY	1.2419	-0.44977	13
GO DETECTION OF EXTERNAL STIMULUS	Biological process	23	20	http://www.broadinstitute.org/gsea/msigdb/cards/DETECTION_OF_EXTERNAL_STIMULUS	1.2338	0.26142	0
GO GOLGI VESICLE TRANSPORT	Biological process	48	45	http://www.broadinstitute.org/gsea/msigdb/cards/GOLGI_VESICLE_TRANSPORT	1.2333	6.5567	1
GO METHYLTRANSFERASE ACTIVITY	Molecular function	36	34	http://www.broadinstitute.org/gsea/msigdb/cards/METHYLTRANSFERASE_ACTIVITY	1.2279	9.4688	7
BIOCARTA DC PATHWAY	Cytokines/Chemokines - Hematopoiesis – Immunology	22	22	http://www.broadinstitute.org/gsea/msigdb/cards/BIOCARTA_DC_PATHWAY	1.2131	-1.442	0
BIOCARTA CYTOKINE PATHWAY	Cell Signaling – Cytokines/Chemokines - Hematopoiesis – Immunology	22	21	http://www.broadinstitute.org/gsea/msigdb/cards/BIOCARTA_CYTOKINE_PATHWAY	1.2011	-0.037025	1
KEGG GLYCOSAMINOGLYCAN DEGRADATION	Metabolism	21	21	http://www.broadinstitute.org/gsea/msigdb/cards/KEGG_GLYCOSAMINOGLYCAN_DEGRADATION	1.1718	7.6024	0
GO LOCOMOTORY BEHAVIOR	Biological process	95	86	http://www.broadinstitute.org/gsea/msigdb/cards/LOCOMOTORY_BEHAVIOR	1.1714	-3.2746	3
GO INORGANIC ANION TRANSMEMBRANE TRANSPORTER ACTIVITY	Molecular function	19	18	http://www.broadinstitute.org/gsea/msigdb/cards/INORGANIC_ANION_TRANSMEMBRANE_TRANSPORTER_ACTIVITY	1.1666	0.017776	1
BIOCARTA PML PATHWAY	Expression	17	17	http://www.broadinstitute.org/gsea/msigdb/cards/BIOCARTA_PML_PATHWAY	1.1662	15.014	8
GO REGULATION OF PHOSPHORYLATION	Biological process	49	43	http://www.broadinstitute.org/gsea/msigdb/cards/REGULATION_OF_PHOSPHORYLATION	1.1646	-1.7387	9
GO POSITIVE REGULATION OF DEVELOPMENTAL PROCESS	Biological process	218	197	http://www.broadinstitute.org/gsea/msigdb/cards/POSITIVE_REGULATION_OF_DEVELOPMENTAL_PROCESS	1.1624	24.096	20
GO HYDROLASE ACTIVITY HYDROLYZING O GLYCOSYL COMPOUNDS	Molecular function	37	35	http://www.broadinstitute.org/gsea/msigdb/cards/HYDROLASE_ACTIVITY_HYDROLYZING_O_GLYCOSYL_COMPOUNDS	1.1509	17.389	0
BIOCARTA PAR1 PATHWAY	Cell Signaling	37	35	http://www.broadinstitute.org/gsea/msigdb/cards/BIOCARTA_PAR1_PATHWAY	1.1416	-1.0213	4
GO GTPASE BINDING	Molecular function	34	32	http://www.broadinstitute.org/gsea/msigdb/cards/GTPASE_BINDING	1.1375	-0.99964	1
GO CELL RECOGNITION	Biological process	19	16	http://www.broadinstitute.org/gsea/msigdb/cards/CELL_RECOGNITION	1.1201	0.085611	0
BIOCARTA EDG1 PATHWAY	Cell Signaling	27	24	http://www.broadinstitute.org/gsea/msigdb/cards/BIOCARTA_EDG1_PATHWAY	1.1136	-0.01325	5
GO REGULATION OF DEVELOPMENTAL PROCESS	Biological process	440	399	http://www.broadinstitute.org/gsea/msigdb/cards/REGULATION_OF_DEVELOPMENTAL_PROCESS	1.1013	10.767	39
GO INTEGRAL TO ORGANELLE MEMBRANE	Cellular component	50	42	http://www.broadinstitute.org/gsea/msigdb/cards/INTEGRAL_TO_ORGANELLE_MEMBRANE	1.0609	-0.062367	2
GO REGULATION OF APOPTOSIS	Biological process	341	311	http://www.broadinstitute.org/gsea/msigdb/cards/REGULATION_OF_APOPTOSIS	1.0594	17.307	33
KEGG ASCORBATE AND ALDARATE METABOLISM	Metabolism	25	16	http://www.broadinstitute.org/gsea/msigdb/cards/KEGG_ASCORBATE_AND_ALDARATE_METABOLISM	1.0593	-1.7165	1
GO CELL SURFACE	Cellular component	79	69	http://www.broadinstitute.org/gsea/msigdb/cards/CELL_SURFACE	1.0477	6.7499	3
GO HEART DEVELOPMENT	Biological process	37	33	http://www.broadinstitute.org/gsea/msigdb/cards/HEART_DEVELOPMENT	1.038	0.73979	3
GO POSITIVE REGULATION OF HYDROLASE ACTIVITY	Biological process	55	47	http://www.broadinstitute.org/gsea/msigdb/cards/POSITIVE_REGULATION_OF_HYDROLASE_ACTIVITY	1.0206	1.8735	7
GO CARBOHYDRATE KINASE ACTIVITY	Molecular function	15	15	http://www.broadinstitute.org/gsea/msigdb/cards/CARBOHYDRATE_KINASE_ACTIVITY	1.0183	0.028262	0
GO FEMALE PREGNANCY	Biological process	53	44	http://www.broadinstitute.org/gsea/msigdb/cards/FEMALE_PREGNANCY	1.0169	5.0715	0
GO RECEPTOR SIGNALING PROTEIN ACTIVITY	Molecular function	82	78	http://www.broadinstitute.org/gsea/msigdb/cards/RECEPTOR_SIGNALING_PROTEIN_ACTIVITY	1.0161	6.279	6
GO TRANS GOLGI NETWORK	Cellular component	21	17	http://www.broadinstitute.org/gsea/msigdb/cards/TRANS_GOLGI_NETWORK	1.0136	-1.0561	1
KEGG PROXIMAL TUBULE BICARBONATE RECLAMATION	Organismal Systems	23	23	http://www.broadinstitute.org/gsea/msigdb/cards/KEGG_PROXIMAL_TUBULE_BICARBONATE_RECLAMATION	1.0056	0.43888	0
GO LIPID TRANSPORTER ACTIVITY	Molecular function	28	27	http://www.broadinstitute.org/gsea/msigdb/cards/LIPID_TRANSPORTER_ACTIVITY	1.0017	-1.1879	0
GO REGULATION OF SIGNAL TRANSDUCTION	Biological process	222	200	http://www.broadinstitute.org/gsea/msigdb/cards/REGULATION_OF_SIGNAL_TRANSDUCTION	1.0015	3.739	16
GO PROTEIN COMPLEX ASSEMBLY	Biological process	167	158	http://www.broadinstitute.org/gsea/msigdb/cards/PROTEIN_COMPLEX_ASSEMBLY	0.99923	0.0060647	19
KEGG PROTEIN EXPORT	Genetic Information Processing	24	20	http://www.broadinstitute.org/gsea/msigdb/cards/KEGG_PROTEIN_EXPORT	0.98984	0.013814	0
GO REGULATION OF DEFENSE RESPONSE	Biological process	20	18	http://www.broadinstitute.org/gsea/msigdb/cards/REGULATION_OF_DEFENSE_RESPONSE	0.9867	0.035286	0
BIOCARTA ATRBRCA PATHWAY	Apoptosis - Cell Cycle Regulation – Cell Signaling	21	21	http://www.broadinstitute.org/gsea/msigdb/cards/BIOCARTA_ATRBRCA_PATHWAY	0.98356	13.932	10
GO ENZYME ACTIVATOR ACTIVITY	Molecular function	125	115	http://www.broadinstitute.org/gsea/msigdb/cards/ENZYME_ACTIVATOR_ACTIVITY	0.97317	-0.53092	6
GO DNA RECOMBINATION	Biological process	47	43	http://www.broadinstitute.org/gsea/msigdb/cards/DNA_RECOMBINATION	0.97082	12.871	6
GO LEUKOCYTE ACTIVATION	Biological process	69	65	http://www.broadinstitute.org/gsea/msigdb/cards/LEUKOCYTE_ACTIVATION	0.94906	-0.14907	4
BIOCARTA NGF PATHWAY	Cell Activation-Cell Signaling-Cytokines/Chemokines-Neuroscience	18	17	http://www.broadinstitute.org/gsea/msigdb/cards/BIOCARTA_NGF_PATHWAY	0.94074	-0.24919	6
GO DNA POLYMERASE ACTIVITY	Molecular function	18	18	http://www.broadinstitute.org/gsea/msigdb/cards/DNA_POLYMERASE_ACTIVITY	0.93453	33.976	1
GO HYDROLASE ACTIVITY ACTING ON ESTER BONDS	Molecular function	269	255	http://www.broadinstitute.org/gsea/msigdb/cards/HYDROLASE_ACTIVITY_ACTING_ON_ESTER_BONDS	0.93345	0.023189	9
GO GROWTH FACTOR ACTIVITY	Molecular function	55	49	http://www.broadinstitute.org/gsea/msigdb/cards/GROWTH_FACTOR_ACTIVITY	0.92755	-0.084439	1
GO VITAMIN METABOLIC PROCESS	Biological process	17	17	http://www.broadinstitute.org/gsea/msigdb/cards/VITAMIN_METABOLIC_PROCESS	0.92178	-0.34816	0
GO NEGATIVE REGULATION OF CELL PROLIFERATION	Biological process	156	146	http://www.broadinstitute.org/gsea/msigdb/cards/NEGATIVE_REGULATION_OF_CELL_PROLIFERATION	0.92129	2.1402	17
GO ADENYL NUCLEOTIDE BINDING	Molecular function	169	150	http://www.broadinstitute.org/gsea/msigdb/cards/ADENYL_NUCLEOTIDE_BINDING	0.90718	2.5318	8
GO ACETYLCHOLINE BINDING	Molecular function	17	16	http://www.broadinstitute.org/gsea/msigdb/cards/ACETYLCHOLINE_BINDING	0.90541	-0.013545	0
GO RHO PROTEIN SIGNAL TRANSDUCTION	Biological process	38	36	http://www.broadinstitute.org/gsea/msigdb/cards/RHO_PROTEIN_SIGNAL_TRANSDUCTION	0.90022	2.5359	2
GO ONE CARBON COMPOUND METABOLIC PROCESS	Biological process	26	26	http://www.broadinstitute.org/gsea/msigdb/cards/ONE_CARBON_COMPOUND_METABOLIC_PROCESS	0.89789	13.904	4
BIOCARTA RACCYCD PATHWAY	Cell Signaling	26	26	http://www.broadinstitute.org/gsea/msigdb/cards/BIOCARTA_RACCYCD_PATHWAY	0.85536	60.782	11
GO PROTEIN SECRETION	Biological process	32	23	http://www.broadinstitute.org/gsea/msigdb/cards/PROTEIN_SECRETION	0.85444	-0.4029	0
GO ENZYME INHIBITOR ACTIVITY	Molecular function	119	116	http://www.broadinstitute.org/gsea/msigdb/cards/ENZYME_INHIBITOR_ACTIVITY	0.85374	-0.0082917	4
GO SYNAPSE ORGANIZATION AND BIOGENESIS	Biological process	23	22	http://www.broadinstitute.org/gsea/msigdb/cards/SYNAPSE_ORGANIZATION_AND_BIOGENESIS	0.8268	6.9641	0
GO POSITIVE REGULATION OF CATALYTIC ACTIVITY	Biological process	165	146	http://www.broadinstitute.org/gsea/msigdb/cards/POSITIVE_REGULATION_OF_CATALYTIC_ACTIVITY	0.82294	0.15792	18
GO PROTEIN DIMERIZATION ACTIVITY	Molecular function	182	171	http://www.broadinstitute.org/gsea/msigdb/cards/PROTEIN_DIMERIZATION_ACTIVITY	0.7995	0.46584	15
GO GOLGI APPARATUS	Cellular component	225	199	http://www.broadinstitute.org/gsea/msigdb/cards/GOLGI_APPARATUS	0.79028	4.8419	9
BIOCARTA MYOSIN PATHWAY	Cell Signaling	31	30	http://www.broadinstitute.org/gsea/msigdb/cards/BIOCARTA_MYOSIN_PATHWAY	0.7831	-0.82624	2
GO N ACYLTRANSFERASE ACTIVITY	Molecular function	24	18	http://www.broadinstitute.org/gsea/msigdb/cards/N_ACYLTRANSFERASE_ACTIVITY	0.77996	0.012843	4
BIOCARTA P53HYPOXIA PATHWAY	Apoptosis - Cell Cycle Regulation – Expression	23	22	http://www.broadinstitute.org/gsea/msigdb/cards/BIOCARTA_P53HYPOXIA_PATHWAY	0.77213	10.445	5
GO TRANSFERASE ACTIVITY TRANSFERRING ONE CARBON GROUPS	Molecular function	37	35	http://www.broadinstitute.org/gsea/msigdb/cards/TRANSFERASE_ACTIVITY_TRANSFERRING_ONE_CARBON_GROUPS	0.76921	8.1963	7
GO ACTIN FILAMENT	Cellular component	18	16	http://www.broadinstitute.org/gsea/msigdb/cards/ACTIN_FILAMENT	0.76191	0.91924	2
GO MORPHOGENESIS OF AN EPITHELIUM	Biological process	16	15	http://www.broadinstitute.org/gsea/msigdb/cards/MORPHOGENESIS_OF_AN_EPITHELIUM	0.75627	-1.0779	1
GO ISOMERASE ACTIVITY	Molecular function	35	33	http://www.broadinstitute.org/gsea/msigdb/cards/ISOMERASE_ACTIVITY	0.75509	-0.28962	1
GO CELL CYCLE CHECKPOINT GO 0000075	Biological process	48	44	http://www.broadinstitute.org/gsea/msigdb/cards/CELL_CYCLE_CHECKPOINT_GO_0000075	0.7448	138.44	10
KEGG ALANINE ASPARTATE AND GLUTAMATE METABOLISM	Metabolism	32	32	http://www.broadinstitute.org/gsea/msigdb/cards/KEGG_ALANINE_ASPARTATE_AND_GLUTAMATE_METABOLISM	0.74143	-2.0425	0
GO SPECIFIC RNA POLYMERASE II TRANSCRIPTION FACTOR ACTIVITY	Molecular function	35	34	http://www.broadinstitute.org/gsea/msigdb/cards/SPECIFIC_RNA_POLYMERASE_II_TRANSCRIPTION_FACTOR_ACTIVITY	0.72349	5.3734	2
GO SERINE HYDROLASE ACTIVITY	Molecular function	46	42	http://www.broadinstitute.org/gsea/msigdb/cards/SERINE_HYDROLASE_ACTIVITY	0.71928	-2.9993	1
GO ATPASE ACTIVITY	Molecular function	112	101	http://www.broadinstitute.org/gsea/msigdb/cards/ATPASE_ACTIVITY	0.69832	7.3921	4
GO EXCITATORY EXTRACELLULAR LIGAND GATED ION CHANNEL ACTIVITY	Molecular function	21	19	http://www.broadinstitute.org/gsea/msigdb/cards/EXCITATORY_EXTRACELLULAR_LIGAND_GATED_ION_CHANNEL_ACTIVITY	0.69402	-0.18787	0
GO EXTRACELLULAR LIGAND GATED ION CHANNEL ACTIVITY	Molecular function	22	19	http://www.broadinstitute.org/gsea/msigdb/cards/EXTRACELLULAR_LIGAND_GATED_ION_CHANNEL_ACTIVITY	0.69402	-0.18787	0
BIOCARTA FMLP PATHWAY	Cell Signaling-Cytokines/Chemokines- Immunology	39	34	http://www.broadinstitute.org/gsea/msigdb/cards/BIOCARTA_FMLP_PATHWAY	0.68825	0.97823	5
GO CALMODULIN BINDING	Molecular function	25	25	http://www.broadinstitute.org/gsea/msigdb/cards/CALMODULIN_BINDING	0.68665	1.5337	0
GO OXIDOREDUCTASE ACTIVITY ACTING ON THE ALDEHYDE OR OXO GROUP OF DONORS	Molecular function	22	22	http://www.broadinstitute.org/gsea/msigdb/cards/OXIDOREDUCTASE_ACTIVITY_ACTING_ON_THE_ALDEHYDE_OR_OXO_GROUP_OF_DONORS	0.68451	10.717	1
GO CYTOPLASMIC VESICLE MEMBRANE	Cellular component	28	24	http://www.broadinstitute.org/gsea/msigdb/cards/CYTOPLASMIC_VESICLE_MEMBRANE	0.68273	-0.37068	1
GO CYTOPLASMIC VESICLE PART	Cellular component	28	24	http://www.broadinstitute.org/gsea/msigdb/cards/CYTOPLASMIC_VESICLE_PART	0.68273	-0.37068	1
KEGG ADHERENS JUNCTION	Cellular Processes	75	73	http://www.broadinstitute.org/gsea/msigdb/cards/KEGG_ADHERENS_JUNCTION	0.68212	0.56632	12
GO VESICLE MEMBRANE	Cellular component	30	26	http://www.broadinstitute.org/gsea/msigdb/cards/VESICLE_MEMBRANE	0.67736	-0.69484	1
BIOCARTA CHREBP2 PATHWAY	Cell Signaling	42	42	http://www.broadinstitute.org/gsea/msigdb/cards/BIOCARTA_CHREBP2_PATHWAY	0.67441	-0.41414	3
GO AMINO ACID DERIVATIVE METABOLIC PROCESS	Biological process	24	23	http://www.broadinstitute.org/gsea/msigdb/cards/AMINO_ACID_DERIVATIVE_METABOLIC_PROCESS	0.66835	14.715	0
GO LIPASE ACTIVITY	Molecular function	50	47	http://www.broadinstitute.org/gsea/msigdb/cards/LIPASE_ACTIVITY	0.65128	-0.03297	0
GO COENZYME BINDING	Molecular function	16	15	http://www.broadinstitute.org/gsea/msigdb/cards/COENZYME_BINDING	0.65116	-0.51846	0
GO PROTEIN IMPORT INTO NUCLEUS	Biological process	48	42	http://www.broadinstitute.org/gsea/msigdb/cards/PROTEIN_IMPORT_INTO_NUCLEUS	0.64742	-0.1934	7
GO POSITIVE REGULATION OF JNK ACTIVITY	Biological process	18	18	http://www.broadinstitute.org/gsea/msigdb/cards/POSITIVE_REGULATION_OF_JNK_ACTIVITY	0.64371	-0.00279	1
GO DAMAGED DNA BINDING	Molecular function	21	19	http://www.broadinstitute.org/gsea/msigdb/cards/DAMAGED_DNA_BINDING	0.63832	0.054314	7
BIOCARTA HER2 PATHWAY	Cell Signaling	22	22	http://www.broadinstitute.org/gsea/msigdb/cards/BIOCARTA_HER2_PATHWAY	0.63502	-0.26042	9
KEGG MELANOGENESIS	Organismal Systems	102	98	http://www.broadinstitute.org/gsea/msigdb/cards/KEGG_MELANOGENESIS	0.63204	-0.15724	17
GO MITOCHONDRIAL OUTER MEMBRANE	Cellular component	18	17	http://www.broadinstitute.org/gsea/msigdb/cards/MITOCHONDRIAL_OUTER_MEMBRANE	0.63155	0.70224	2
KEGG ENDOMETRIAL CANCER	Human Diseases	52	51	http://www.broadinstitute.org/gsea/msigdb/cards/KEGG_ENDOMETRIAL_CANCER	0.63082	-0.067694	23
GO HEMATOPOIETIN INTERFERON CLASSD200 DOMAIN CYTOKINE RECEPTOR ACTIVITY	Molecular function	33	32	http://www.broadinstitute.org/gsea/msigdb/cards/HEMATOPOIETIN_INTERFERON_CLASSD200_DOMAIN_CYTOKINE_RECEPTOR_ACTIVITY	0.62885	-0.58221	3
GO SMALL GTPASE BINDING	Molecular function	33	31	http://www.broadinstitute.org/gsea/msigdb/cards/SMALL_GTPASE_BINDING	0.62752	-0.77948	1
GO MEMBRANE ORGANIZATION AND BIOGENESIS	Biological process	135	124	http://www.broadinstitute.org/gsea/msigdb/cards/MEMBRANE_ORGANIZATION_AND_BIOGENESIS	0.62299	0.50818	10
GO NEGATIVE REGULATION OF CELL CYCLE	Biological process	79	74	http://www.broadinstitute.org/gsea/msigdb/cards/NEGATIVE_REGULATION_OF_CELL_CYCLE	0.5887	-0.88715	9
GO MYOFIBRIL	Cellular component	19	19	http://www.broadinstitute.org/gsea/msigdb/cards/MYOFIBRIL	0.58242	-0.10245	2
KEGG GLYCOSAMINOGLYCAN BIOSYNTHESIS HEPARAN SULFATE	Metabolism	26	25	http://www.broadinstitute.org/gsea/msigdb/cards/KEGG_GLYCOSAMINOGLYCAN_BIOSYNTHESIS_HEPARAN_SULFATE	0.57754	-0.0013323	2
GO CLATHRIN COATED VESICLE	Cellular component	37	31	http://www.broadinstitute.org/gsea/msigdb/cards/CLATHRIN_COATED_VESICLE	0.57584	-0.25271	2
KEGG GLYCEROLIPID METABOLISM	Metabolism	49	43	http://www.broadinstitute.org/gsea/msigdb/cards/KEGG_GLYCEROLIPID_METABOLISM	0.57563	13.361	1
GO TUBE DEVELOPMENT	Biological process	18	17	http://www.broadinstitute.org/gsea/msigdb/cards/TUBE_DEVELOPMENT	0.57191	-0.00097324	1
BIOCARTA CCR5 PATHWAY	Cell Signaling-Hematopoiesis-Immunology	20	15	http://www.broadinstitute.org/gsea/msigdb/cards/BIOCARTA_CCR5_PATHWAY	0.56885	0.1426	2
KEGG TYPE II DIABETES MELLITUS	Human Diseases	47	44	http://www.broadinstitute.org/gsea/msigdb/cards/KEGG_TYPE_II_DIABETES_MELLITUS	0.56781	-0.27327	3
GO S ADENOSYLMETHIONINE DEPENDENT METHYLTRANSFERASE ACTIVITY	Molecular function	23	22	http://www.broadinstitute.org/gsea/msigdb/cards/S_ADENOSYLMETHIONINE_DEPENDENT_METHYLTRANSFERASE_ACTIVITY	0.55717	8.6315	4
GO TRANSITION METAL ION BINDING	Molecular function	111	105	http://www.broadinstitute.org/gsea/msigdb/cards/TRANSITION_METAL_ION_BINDING	0.55487	27.168	9
GO MUSCLE DEVELOPMENT	Biological process	93	89	http://www.broadinstitute.org/gsea/msigdb/cards/MUSCLE_DEVELOPMENT	0.55439	11.559	5
KEGG VEGF SIGNALING PATHWAY	Environmental Information Processing	76	71	http://www.broadinstitute.org/gsea/msigdb/cards/KEGG_VEGF_SIGNALING_PATHWAY	0.54449	-0.41264	12
BIOCARTA 41BB PATHWAY	Cell Activation-Cell Signaling-immunology	17	17	http://www.broadinstitute.org/gsea/msigdb/cards/BIOCARTA_41BB_PATHWAY	0.53512	1.7526	2
GO CELL DIVISION	Biological process	21	20	http://www.broadinstitute.org/gsea/msigdb/cards/CELL_DIVISION	0.52001	4.1722	2
GO REGULATION OF RESPONSE TO STIMULUS	Biological process	59	57	http://www.broadinstitute.org/gsea/msigdb/cards/REGULATION_OF_RESPONSE_TO_STIMULUS	0.51538	-1.871	2
BIOCARTA TNFR2 PATHWAY	Apoptosis-Cell Signaling	18	18	http://www.broadinstitute.org/gsea/msigdb/cards/BIOCARTA_TNFR2_PATHWAY	0.5134	-0.16227	1
GO NEURON DIFFERENTIATION	Biological process	76	73	http://www.broadinstitute.org/gsea/msigdb/cards/NEURON_DIFFERENTIATION	0.50698	1.0287	0
GO NUCLEAR IMPORT	Biological process	50	43	http://www.broadinstitute.org/gsea/msigdb/cards/NUCLEAR_IMPORT	0.50537	-0.20773	7
KEGG STARCH AND SUCROSE METABOLISM	Metabolism	52	39	http://www.broadinstitute.org/gsea/msigdb/cards/KEGG_STARCH_AND_SUCROSE_METABOLISM	0.49143	-0.00058874	0
GO GENERAL RNA POLYMERASE II TRANSCRIPTION FACTOR ACTIVITY	Molecular function	32	24	http://www.broadinstitute.org/gsea/msigdb/cards/GENERAL_RNA_POLYMERASE_II_TRANSCRIPTION_FACTOR_ACTIVITY	0.49004	-0.85092	3
GO HYDROLASE ACTIVITY ACTING ON GLYCOSYL BONDS	Molecular function	47	44	http://www.broadinstitute.org/gsea/msigdb/cards/HYDROLASE_ACTIVITY_ACTING_ON_GLYCOSYL_BONDS	0.48422	5.808	2
GO DETECTION OF STIMULUS INVOLVED IN SENSORY PERCEPTION	Biological process	21	19	http://www.broadinstitute.org/gsea/msigdb/cards/DETECTION_OF_STIMULUS_INVOLVED_IN_SENSORY_PERCEPTION	0.47936	0.11169	0
GO AMINE METABOLIC PROCESS	Biological process	141	135	http://www.broadinstitute.org/gsea/msigdb/cards/AMINE_METABOLIC_PROCESS	0.47358	9.4901	2
GO ER TO GOLGI VESICLE MEDIATED TRANSPORT	Biological process	18	15	http://www.broadinstitute.org/gsea/msigdb/cards/ER_TO_GOLGI_VESICLE_MEDIATED_TRANSPORT	0.47057	6.2259	0
BIOCARTA IL7 PATHWAY	Cell Signaling-Cytokines/Chemokines	17	17	http://www.broadinstitute.org/gsea/msigdb/cards/BIOCARTA_IL7_PATHWAY	0.46304	-0.61784	9
GO SODIUM ION TRANSPORT	Biological process	22	19	http://www.broadinstitute.org/gsea/msigdb/cards/SODIUM_ION_TRANSPORT	0.46125	-0.29378	0
KEGG T CELL RECEPTOR SIGNALING PATHWAY	Organismal Systems	108	107	http://www.broadinstitute.org/gsea/msigdb/cards/KEGG_T_CELL_RECEPTOR_SIGNALING_PATHWAY	0.45739	-0.025928	21
GO SYNAPTOGENESIS	Biological process	18	18	http://www.broadinstitute.org/gsea/msigdb/cards/SYNAPTOGENESIS	0.44685	5.1406	0
GO PROTEIN AMINO ACID N LINKED GLYCOSYLATION	Biological process	30	28	http://www.broadinstitute.org/gsea/msigdb/cards/PROTEIN_AMINO_ACID_N_LINKED_GLYCOSYLATION	0.43503	-0.46109	2
KEGG P53 SIGNALING PATHWAY	Cellular Processes	69	64	http://www.broadinstitute.org/gsea/msigdb/cards/KEGG_P53_SIGNALING_PATHWAY	0.43329	18.67	15
KEGG NICOTINATE AND NICOTINAMIDE METABOLISM	Metabolism	24	21	http://www.broadinstitute.org/gsea/msigdb/cards/KEGG_NICOTINATE_AND_NICOTINAMIDE_METABOLISM	0.42271	0.56237	1
GO GUANYL NUCLEOTIDE BINDING	Molecular function	47	45	http://www.broadinstitute.org/gsea/msigdb/cards/GUANYL_NUCLEOTIDE_BINDING	0.4224	-0.18747	0
GO ATP BINDING	Molecular function	156	139	http://www.broadinstitute.org/gsea/msigdb/cards/ATP_BINDING	0.4204	8.0189	8
GO REGULATION OF MITOSIS	Biological process	41	39	http://www.broadinstitute.org/gsea/msigdb/cards/REGULATION_OF_MITOSIS	0.41986	32.959	3
GO CELLULAR LIPID CATABOLIC PROCESS	Biological process	35	31	http://www.broadinstitute.org/gsea/msigdb/cards/CELLULAR_LIPID_CATABOLIC_PROCESS	0.40595	-0.11657	0
GO RESPONSE TO NUTRIENT LEVELS	Biological process	29	27	http://www.broadinstitute.org/gsea/msigdb/cards/RESPONSE_TO_NUTRIENT_LEVELS	0.40365	-0.032711	2
GO CYTOKINE AND CHEMOKINE MEDIATED SIGNALING PATHWAY	Biological process	23	22	http://www.broadinstitute.org/gsea/msigdb/cards/CYTOKINE_AND_CHEMOKINE_MEDIATED_SIGNALING_PATHWAY	0.40303	1.9843	1
GO GUANYL NUCLEOTIDE EXCHANGE FACTOR ACTIVITY	Molecular function	46	41	http://www.broadinstitute.org/gsea/msigdb/cards/GUANYL_NUCLEOTIDE_EXCHANGE_FACTOR_ACTIVITY	0.40203	-0.029564	0
KEGG GNRH SIGNALING PATHWAY	Organismal Systems	101	97	http://www.broadinstitute.org/gsea/msigdb/cards/KEGG_GNRH_SIGNALING_PATHWAY	0.39786	0.054583	12
GO NITROGEN COMPOUND BIOSYNTHETIC PROCESS	Biological process	26	25	http://www.broadinstitute.org/gsea/msigdb/cards/NITROGEN_COMPOUND_BIOSYNTHETIC_PROCESS	0.38289	0.90361	2
BIOCARTA ACH PATHWAY	Apoptosis-Cell Activation-Cell Signaling-Neuroscience	16	15	http://www.broadinstitute.org/gsea/msigdb/cards/BIOCARTA_ACH_PATHWAY	0.38232	0.67765	4
GO NEGATIVE REGULATION OF TRANSCRIPTION FROM RNA POLYMERASE II PROMOTER	Biological process	84	75	http://www.broadinstitute.org/gsea/msigdb/cards/NEGATIVE_REGULATION_OF_TRANSCRIPTION_FROM_RNA_POLYMERASE_II_PROMOTER	0.37987	62.71	11
GO REGULATION OF CYTOSKELETON ORGANIZATION AND BIOGENESIS	Biological process	30	28	http://www.broadinstitute.org/gsea/msigdb/cards/REGULATION_OF_CYTOSKELETON_ORGANIZATION_AND_BIOGENESIS	0.37633	-0.32011	3
GO NUCLEOTIDE METABOLIC PROCESS	Biological process	42	38	http://www.broadinstitute.org/gsea/msigdb/cards/NUCLEOTIDE_METABOLIC_PROCESS	0.37601	1.3497	1
GO REGULATION OF JNK ACTIVITY	Biological process	20	20	http://www.broadinstitute.org/gsea/msigdb/cards/REGULATION_OF_JNK_ACTIVITY	0.37051	0.011055	1
BIOCARTA TGFB PATHWAY	Cell Signaling-Cytokines/Chemokines	19	18	http://www.broadinstitute.org/gsea/msigdb/cards/BIOCARTA_TGFB_PATHWAY	0.37036	-0.31638	5
GO CYTOSOLIC PART	Cellular component	23	23	http://www.broadinstitute.org/gsea/msigdb/cards/CYTOSOLIC_PART	0.36722	1.1803	3
GO SYNAPSE	Cellular component	27	27	http://www.broadinstitute.org/gsea/msigdb/cards/SYNAPSE	0.36489	5.8314	1
GO POSITIVE REGULATION OF CYTOKINE BIOSYNTHETIC PROCESS	Biological process	25	24	http://www.broadinstitute.org/gsea/msigdb/cards/POSITIVE_REGULATION_OF_CYTOKINE_BIOSYNTHETIC_PROCESS	0.36341	-2.2767	2
GO SPINDLE	Cellular component	39	37	http://www.broadinstitute.org/gsea/msigdb/cards/SPINDLE	0.36177	108.09	1
GO IMMUNE EFFECTOR PROCESS	Biological process	38	37	http://www.broadinstitute.org/gsea/msigdb/cards/IMMUNE_EFFECTOR_PROCESS	0.35476	0.073071	3
BIOCARTA ERK PATHWAY	Adhesion - Cell Signaling	28	27	http://www.broadinstitute.org/gsea/msigdb/cards/BIOCARTA_ERK_PATHWAY	0.35236	-0.28831	9
GO REGULATION OF MITOTIC CELL CYCLE	Biological process	23	17	http://www.broadinstitute.org/gsea/msigdb/cards/REGULATION_OF_MITOTIC_CELL_CYCLE	0.34441	39.232	1
GO REGULATION OF CELLULAR COMPONENT ORGANIZATION AND BIOGENESIS	Biological process	125	108	http://www.broadinstitute.org/gsea/msigdb/cards/REGULATION_OF_CELLULAR_COMPONENT_ORGANIZATION_AND_BIOGENESIS	0.33716	-0.03671	11
BIOCARTA CARDIACEGF PATHWAY	Cell Signaling	18	17	http://www.broadinstitute.org/gsea/msigdb/cards/BIOCARTA_CARDIACEGF_PATHWAY	0.33526	-0.18271	4
BIOCARTA HIVNEF PATHWAY	Apoptosis	58	55	http://www.broadinstitute.org/gsea/msigdb/cards/BIOCARTA_HIVNEF_PATHWAY	0.33448	0.21409	6
GO INTRACELLULAR PROTEIN TRANSPORT	Biological process	145	129	http://www.broadinstitute.org/gsea/msigdb/cards/INTRACELLULAR_PROTEIN_TRANSPORT	0.32667	-0.35388	10
GO SECONDARY ACTIVE TRANSMEMBRANE TRANSPORTER ACTIVITY	Molecular function	47	47	http://www.broadinstitute.org/gsea/msigdb/cards/SECONDARY_ACTIVE_TRANSMEMBRANE_TRANSPORTER_ACTIVITY	0.3121	0.16777	0
GO HEMOPOIETIC OR LYMPHOID ORGAN DEVELOPMENT	Biological process	77	72	http://www.broadinstitute.org/gsea/msigdb/cards/HEMOPOIETIC_OR_LYMPHOID_ORGAN_DEVELOPMENT	0.31128	-0.59928	10
GO ANION CATION SYMPORTER ACTIVITY	Molecular function	16	16	http://www.broadinstitute.org/gsea/msigdb/cards/ANION_CATION_SYMPORTER_ACTIVITY	0.3106	-0.014329	0
GO CALCIUM ION TRANSPORT	Biological process	27	25	http://www.broadinstitute.org/gsea/msigdb/cards/CALCIUM_ION_TRANSPORT	0.31048	-0.43702	0
KEGG PROSTATE CANCER	Human Diseases	89	87	http://www.broadinstitute.org/gsea/msigdb/cards/KEGG_PROSTATE_CANCER	0.30781	3.3921	32
GO CELL SUBSTRATE ADHESION	Biological process	39	37	http://www.broadinstitute.org/gsea/msigdb/cards/CELL_SUBSTRATE_ADHESION	0.30031	-0.1785	6
GO TRANSLATIONAL INITIATION	Biological process	39	26	http://www.broadinstitute.org/gsea/msigdb/cards/TRANSLATIONAL_INITIATION	0.28307	0.040409	1
GO MACROMOLECULAR COMPLEX DISASSEMBLY	Biological process	15	15	http://www.broadinstitute.org/gsea/msigdb/cards/MACROMOLECULAR_COMPLEX_DISASSEMBLY	0.27714	-0.35169	3
GO CARBOHYDRATE TRANSPORT	Biological process	19	19	http://www.broadinstitute.org/gsea/msigdb/cards/CARBOHYDRATE_TRANSPORT	0.27653	-0.044091	0
GO GALACTOSYLTRANSFERASE ACTIVITY	Molecular function	16	16	http://www.broadinstitute.org/gsea/msigdb/cards/GALACTOSYLTRANSFERASE_ACTIVITY	0.27179	0.01415	0
GO AMINE CATABOLIC PROCESS	Biological process	27	24	http://www.broadinstitute.org/gsea/msigdb/cards/AMINE_CATABOLIC_PROCESS	0.271	24.026	0
GO DOUBLE STRANDED RNA BINDING	Molecular function	17	16	http://www.broadinstitute.org/gsea/msigdb/cards/DOUBLE_STRANDED_RNA_BINDING	0.26977	-1.7085	1
KEGG CALCIUM SIGNALING PATHWAY	Environmental Information Processing	178	171	http://www.broadinstitute.org/gsea/msigdb/cards/KEGG_CALCIUM_SIGNALING_PATHWAY	0.26452	-2.5637	7
KEGG WNT SIGNALING PATHWAY	Environmental Information Processing	151	144	http://www.broadinstitute.org/gsea/msigdb/cards/KEGG_WNT_SIGNALING_PATHWAY	0.26165	1.2789	15
BIOCARTA IL2 PATHWAY	Cell Signaling – Cytokines/Chemokines – Immunology	22	22	http://www.broadinstitute.org/gsea/msigdb/cards/BIOCARTA_IL2_PATHWAY	0.25758	-0.52733	9
KEGG MTOR SIGNALING PATHWAY	Environmental Information Processing	52	46	http://www.broadinstitute.org/gsea/msigdb/cards/KEGG_MTOR_SIGNALING_PATHWAY	0.2501	-0.16977	8
GO EXTRINSIC TO MEMBRANE	Cellular component	25	22	http://www.broadinstitute.org/gsea/msigdb/cards/EXTRINSIC_TO_MEMBRANE	0.24749	-0.46828	2
GO ADENYL RIBONUCLEOTIDE BINDING	Molecular function	163	146	http://www.broadinstitute.org/gsea/msigdb/cards/ADENYL_RIBONUCLEOTIDE_BINDING	0.24668	2.3096	8
BIOCARTA IL22BP PATHWAY	Cell Signaling-Cytokines/Chemokines-Immunology	16	16	http://www.broadinstitute.org/gsea/msigdb/cards/BIOCARTA_IL22BP_PATHWAY	0.24559	2.4676	4
GO GTP BINDING	Molecular function	46	44	http://www.broadinstitute.org/gsea/msigdb/cards/GTP_BINDING	0.24368	-0.056323	0
BIOCARTA VEGF PATHWAY	Cell Signaling	29	27	http://www.broadinstitute.org/gsea/msigdb/cards/BIOCARTA_VEGF_PATHWAY	0.23669	-0.25535	6
GO PROTEIN TRANSPORT	Biological process	157	141	http://www.broadinstitute.org/gsea/msigdb/cards/PROTEIN_TRANSPORT	0.23617	-0.023603	11
KEGG VIRAL MYOCARDITIS	Human Diseases	73	67	http://www.broadinstitute.org/gsea/msigdb/cards/KEGG_VIRAL_MYOCARDITIS	0.23132	0.045208	7
KEGG GLYCEROPHOSPHOLIPID METABOLISM	Metabolism	77	64	http://www.broadinstitute.org/gsea/msigdb/cards/KEGG_GLYCEROPHOSPHOLIPID_METABOLISM	0.22664	0.23327	0
GO CARBOXYLESTERASE ACTIVITY	Molecular function	33	31	http://www.broadinstitute.org/gsea/msigdb/cards/CARBOXYLESTERASE_ACTIVITY	0.2242	-0.90168	0
GO SERINE TYPE PEPTIDASE ACTIVITY	Molecular function	45	41	http://www.broadinstitute.org/gsea/msigdb/cards/SERINE_TYPE_PEPTIDASE_ACTIVITY	0.21932	-2.5841	1
GO DNA DAMAGE RESPONSESIGNAL TRANSDUCTION	Biological process	35	30	http://www.broadinstitute.org/gsea/msigdb/cards/DNA_DAMAGE_RESPONSESIGNAL_TRANSDUCTION	0.21834	13.404	6
GO SUGAR BINDING	Molecular function	34	32	http://www.broadinstitute.org/gsea/msigdb/cards/SUGAR_BINDING	0.21668	-4.4248	0
GO REGULATION OF CELL ADHESION	Biological process	37	34	http://www.broadinstitute.org/gsea/msigdb/cards/REGULATION_OF_CELL_ADHESION	0.21437	-0.36821	6
KEGG SPHINGOLIPID METABOLISM	Metabolism	40	30	http://www.broadinstitute.org/gsea/msigdb/cards/KEGG_SPHINGOLIPID_METABOLISM	0.2121	0.0022316	0
GO PEPTIDASE ACTIVITY	Molecular function	176	159	http://www.broadinstitute.org/gsea/msigdb/cards/PEPTIDASE_ACTIVITY	0.20984	-0.072861	3
KEGG RIBOFLAVIN METABOLISM	Metabolism	16	16	http://www.broadinstitute.org/gsea/msigdb/cards/KEGG_RIBOFLAVIN_METABOLISM	0.20918	-0.73887	0
KEGG ETHER LIPID METABOLISM	Metabolism	33	28	http://www.broadinstitute.org/gsea/msigdb/cards/KEGG_ETHER_LIPID_METABOLISM	0.20418	2.3878	1
BIOCARTA CTLA4 PATHWAY	Cell Activation – Cell Signaling – Immunology	21	20	http://www.broadinstitute.org/gsea/msigdb/cards/BIOCARTA_CTLA4_PATHWAY	0.19855	0.53456	8
GO STRUCTURAL CONSTITUENT OF CYTOSKELETON	Molecular function	57	54	http://www.broadinstitute.org/gsea/msigdb/cards/STRUCTURAL_CONSTITUENT_OF_CYTOSKELETON	0.19834	0.4328	3
GO SECRETORY PATHWAY	Biological process	84	77	http://www.broadinstitute.org/gsea/msigdb/cards/SECRETORY_PATHWAY	0.19694	1.5134	0
GO DENDRITE	Cellular component	16	16	http://www.broadinstitute.org/gsea/msigdb/cards/DENDRITE	0.19308	-1.1344	1
GO MESODERM DEVELOPMENT	Biological process	22	22	http://www.broadinstitute.org/gsea/msigdb/cards/MESODERM_DEVELOPMENT	0.19296	0.32559	3
GO TRANSCRIPTION COREPRESSOR ACTIVITY	Molecular function	94	80	http://www.broadinstitute.org/gsea/msigdb/cards/TRANSCRIPTION_COREPRESSOR_ACTIVITY	0.18806	42.131	7
GO NUCLEOTIDE EXCISION REPAIR	Biological process	20	19	http://www.broadinstitute.org/gsea/msigdb/cards/NUCLEOTIDE_EXCISION_REPAIR	0.18488	1.8111	8
BIOCARTA IL6 PATHWAY	Cell Signaling – Cytokines/Chemokines – Immunology	22	22	http://www.broadinstitute.org/gsea/msigdb/cards/BIOCARTA_IL6_PATHWAY	0.18292	-0.52548	10
GO COFACTOR BINDING	Molecular function	22	21	http://www.broadinstitute.org/gsea/msigdb/cards/COFACTOR_BINDING	0.18167	-0.63696	0
KEGG INTESTINAL IMMUNE NETWORK FOR IGA PRODUCTION	Organismal Systems	48	45	http://www.broadinstitute.org/gsea/msigdb/cards/KEGG_INTESTINAL_IMMUNE_NETWORK_FOR_IGA_PRODUCTION	0.1802	-0.066774	2
GO POSITIVE REGULATION OF TRANSCRIPTION FROM RNA POLYMERASE II PROMOTER	Biological process	65	57	http://www.broadinstitute.org/gsea/msigdb/cards/POSITIVE_REGULATION_OF_TRANSCRIPTION_FROM_RNA_POLYMERASE_II_PROMOTER	0.17941	3.0708	8
KEGG PENTOSE AND GLUCURONATE INTERCONVERSIONS	Metabolism	28	18	http://www.broadinstitute.org/gsea/msigdb/cards/KEGG_PENTOSE_AND_GLUCURONATE_INTERCONVERSIONS	0.17935	0.19367	0
GO AMINO ACID CATABOLIC PROCESS	Biological process	25	22	http://www.broadinstitute.org/gsea/msigdb/cards/AMINO_ACID_CATABOLIC_PROCESS	0.17818	23.241	0
KEGG ARRHYTHMOGENIC RIGHT VENTRICULAR CARDIOMYOPATHY ARVC	Human Diseases	76	73	http://www.broadinstitute.org/gsea/msigdb/cards/KEGG_ARRHYTHMOGENIC_RIGHT_VENTRICULAR_CARDIOMYOPATHY_ARVC	0.16952	2.2235	2
GO GENERATION OF NEURONS	Biological process	83	80	http://www.broadinstitute.org/gsea/msigdb/cards/GENERATION_OF_NEURONS	0.16707	0.45511	1
GO ESTABLISHMENT AND OR MAINTENANCE OF CHROMATIN ARCHITECTURE	Biological process	77	66	http://www.broadinstitute.org/gsea/msigdb/cards/ESTABLISHMENT_AND_OR_MAINTENANCE_OF_CHROMATIN_ARCHITECTURE	0.16057	2.8044	10
GO AMINE BIOSYNTHETIC PROCESS	Biological process	15	15	http://www.broadinstitute.org/gsea/msigdb/cards/AMINE_BIOSYNTHETIC_PROCESS	0.15177	0.3427	0
BIOCARTA STRESS PATHWAY	Cell Signaling – Cytokines/Chemokines	25	24	http://www.broadinstitute.org/gsea/msigdb/cards/BIOCARTA_STRESS_PATHWAY	0.15086	-0.72753	3
GO CELLULAR RESPONSE TO STIMULUS	Biological process	19	17	http://www.broadinstitute.org/gsea/msigdb/cards/CELLULAR_RESPONSE_TO_STIMULUS	0.149	-2.4507	1
BIOCARTA HCMV PATHWAY	Cell Signaling-Immunology	17	16	http://www.broadinstitute.org/gsea/msigdb/cards/BIOCARTA_HCMV_PATHWAY	0.14609	-0.98793	7
GO NEUROPEPTIDE BINDING	Molecular function	23	23	http://www.broadinstitute.org/gsea/msigdb/cards/NEUROPEPTIDE_BINDING	0.14589	-1.8257	0
GO LYMPHOCYTE ACTIVATION	Biological process	61	58	http://www.broadinstitute.org/gsea/msigdb/cards/LYMPHOCYTE_ACTIVATION	0.14476	-0.07028	4
GO DNA HELICASE ACTIVITY	Molecular function	25	22	http://www.broadinstitute.org/gsea/msigdb/cards/DNA_HELICASE_ACTIVITY	0.1445	-0.42422	5
GO REGULATION OF DNA METABOLIC PROCESS	Biological process	45	41	http://www.broadinstitute.org/gsea/msigdb/cards/REGULATION_OF_DNA_METABOLIC_PROCESS	0.13614	6.4479	4
BIOCARTA IL17 PATHWAY	Cell Signaling-Cytokines/Chemokines-Hematopoiesis-Immunology	17	16	http://www.broadinstitute.org/gsea/msigdb/cards/BIOCARTA_IL17_PATHWAY	0.13448	1.0905	2
GO LIPID CATABOLIC PROCESS	Biological process	38	34	http://www.broadinstitute.org/gsea/msigdb/cards/LIPID_CATABOLIC_PROCESS	0.13315	-0.13768	0
GO DETECTION OF CHEMICAL STIMULUS	Biological process	18	15	http://www.broadinstitute.org/gsea/msigdb/cards/DETECTION_OF_CHEMICAL_STIMULUS	0.13074	-0.00078819	0
GO NERVOUS SYSTEM DEVELOPMENT	Biological process	385	358	http://www.broadinstitute.org/gsea/msigdb/cards/NERVOUS_SYSTEM_DEVELOPMENT	0.12553	7.5016	13
GO AMINO ACID TRANSPORT	Biological process	26	26	http://www.broadinstitute.org/gsea/msigdb/cards/AMINO_ACID_TRANSPORT	0.12115	-0.05085	0
BIOCARTA HDAC PATHWAY	Cell Signaling-Developmental Biology	32	28	http://www.broadinstitute.org/gsea/msigdb/cards/BIOCARTA_HDAC_PATHWAY	0.12105	-0.45503	3
GO STRIATED MUSCLE DEVELOPMENT	Biological process	40	38	http://www.broadinstitute.org/gsea/msigdb/cards/STRIATED_MUSCLE_DEVELOPMENT	0.12079	-0.018536	3
BIOCARTA BAD PATHWAY	Apoptosis - Cell Signaling	26	26	http://www.broadinstitute.org/gsea/msigdb/cards/BIOCARTA_BAD_PATHWAY	0.11918	-0.2816	6
GO PIGMENT METABOLIC PROCESS	Biological process	18	18	http://www.broadinstitute.org/gsea/msigdb/cards/PIGMENT_METABOLIC_PROCESS	0.11343	-0.0044116	1
BIOCARTA TALL1 PATHWAY	Cell Activation-Immunology	15	15	http://www.broadinstitute.org/gsea/msigdb/cards/BIOCARTA_TALL1_PATHWAY	0.11295	0.12909	1
GO G PROTEIN COUPLED RECEPTOR BINDING	Molecular function	54	51	http://www.broadinstitute.org/gsea/msigdb/cards/G_PROTEIN_COUPLED_RECEPTOR_BINDING	0.1115	-1.3283	0
BIOCARTA EPO PATHWAY	Cell Signaling – Cytokines/Chemokines - Hematopoiesis – Immunology	19	19	http://www.broadinstitute.org/gsea/msigdb/cards/BIOCARTA_EPO_PATHWAY	0.10799	-0.059319	5
KEGG RIG I LIKE RECEPTOR SIGNALING PATHWAY	Organismal Systems	71	65	http://www.broadinstitute.org/gsea/msigdb/cards/KEGG_RIG_I_LIKE_RECEPTOR_SIGNALING_PATHWAY	0.10715	-0.10813	1
GO EXCRETION	Biological process	36	35	http://www.broadinstitute.org/gsea/msigdb/cards/EXCRETION	0.10666	1.5062	0
BIOCARTA TCR PATHWAY	Cell Activation-Cell Signaling -Immunology	49	44	http://www.broadinstitute.org/gsea/msigdb/cards/BIOCARTA_TCR_PATHWAY	0.10502	-1.2355	11
GO REGULATION OF ORGANELLE ORGANIZATION AND BIOGENESIS	Biological process	40	37	http://www.broadinstitute.org/gsea/msigdb/cards/REGULATION_OF_ORGANELLE_ORGANIZATION_AND_BIOGENESIS	0.10387	-0.23962	5
GO HEPARIN BINDING	Molecular function	23	21	http://www.broadinstitute.org/gsea/msigdb/cards/HEPARIN_BINDING	0.10154	-0.70363	0
GO PROTEIN LOCALIZATION	Biological process	214	189	http://www.broadinstitute.org/gsea/msigdb/cards/PROTEIN_LOCALIZATION	0.096016	-0.00010739	14
GO PROTEIN COMPLEX BINDING	Molecular function	54	53	http://www.broadinstitute.org/gsea/msigdb/cards/PROTEIN_COMPLEX_BINDING	0.094342	-1.1587	7
GO PHOSPHOLIPASE ACTIVITY	Molecular function	42	39	http://www.broadinstitute.org/gsea/msigdb/cards/PHOSPHOLIPASE_ACTIVITY	0.093755	-0.24477	0
BIOCARTA IGF1MTOR PATHWAY	Cell Signaling	20	19	http://www.broadinstitute.org/gsea/msigdb/cards/BIOCARTA_IGF1MTOR_PATHWAY	0.092069	-0.2063	4
GO ENZYME BINDING	Molecular function	178	163	http://www.broadinstitute.org/gsea/msigdb/cards/ENZYME_BINDING	0.091855	-0.1243	16
GO REGULATION OF CYCLIN DEPENDENT PROTEIN KINASE ACTIVITY	Biological process	43	42	http://www.broadinstitute.org/gsea/msigdb/cards/REGULATION_OF_CYCLIN_DEPENDENT_PROTEIN_KINASE_ACTIVITY	0.080381	0.015608	7
GO DI TRI VALENT INORGANIC CATION TRANSPORT	Biological process	32	30	http://www.broadinstitute.org/gsea/msigdb/cards/DI___TRI_VALENT_INORGANIC_CATION_TRANSPORT	0.079713	-0.34282	0
GO LEADING EDGE	Cellular component	47	41	http://www.broadinstitute.org/gsea/msigdb/cards/LEADING_EDGE	0.075223	1.7603	4
GO NEUROPEPTIDE RECEPTOR ACTIVITY	Molecular function	22	22	http://www.broadinstitute.org/gsea/msigdb/cards/NEUROPEPTIDE_RECEPTOR_ACTIVITY	0.075073	-1.5139	0
BIOCARTA BARRESTIN SRC PATHWAY	Cell Signaling	15	15	http://www.broadinstitute.org/gsea/msigdb/cards/BIOCARTA_BARRESTIN_SRC_PATHWAY	0.070868	3.1846	5
GO RESPONSE TO ORGANIC SUBSTANCE	Biological process	30	28	http://www.broadinstitute.org/gsea/msigdb/cards/RESPONSE_TO_ORGANIC_SUBSTANCE	0.069529	-0.067228	2
KEGG NON SMALL CELL LUNG CANCER	Human Diseases	54	52	http://www.broadinstitute.org/gsea/msigdb/cards/KEGG_NON_SMALL_CELL_LUNG_CANCER	0.068757	0.00070064	20
GO REGULATION OF INTRACELLULAR TRANSPORT	Biological process	25	22	http://www.broadinstitute.org/gsea/msigdb/cards/REGULATION_OF_INTRACELLULAR_TRANSPORT	0.068067	-0.35252	3
GO MYOSIN COMPLEX	Cellular component	16	15	http://www.broadinstitute.org/gsea/msigdb/cards/MYOSIN_COMPLEX	0.06725	1.0894	0
GO INORGANIC ANION TRANSPORT	Biological process	18	16	http://www.broadinstitute.org/gsea/msigdb/cards/INORGANIC_ANION_TRANSPORT	0.061696	0.47667	1
GO HEMOPOIESIS	Biological process	75	70	http://www.broadinstitute.org/gsea/msigdb/cards/HEMOPOIESIS	0.059355	-0.71369	10
GO TRANSCRIPTION FROM RNA POLYMERASE III PROMOTER	Biological process	19	19	http://www.broadinstitute.org/gsea/msigdb/cards/TRANSCRIPTION_FROM_RNA_POLYMERASE_III_PROMOTER	0.057571	-2.5743	1
GO MRNA BINDING	Molecular function	23	21	http://www.broadinstitute.org/gsea/msigdb/cards/MRNA_BINDING	0.056761	-0.19376	0
GO CELLULAR CARBOHYDRATE CATABOLIC PROCESS	Biological process	23	22	http://www.broadinstitute.org/gsea/msigdb/cards/CELLULAR_CARBOHYDRATE_CATABOLIC_PROCESS	0.056247	0.52657	0
GO GENERATION OF A SIGNAL INVOLVED IN CELL CELL SIGNALING	Biological process	29	27	http://www.broadinstitute.org/gsea/msigdb/cards/GENERATION_OF_A_SIGNAL_INVOLVED_IN_CELL_CELL_SIGNALING	0.056114	-0.79575	0
GO REGULATION OF BLOOD PRESSURE	Biological process	22	21	http://www.broadinstitute.org/gsea/msigdb/cards/REGULATION_OF_BLOOD_PRESSURE	0.055715	-0.61066	0
BIOCARTA IGF1 PATHWAY	Cell Signaling – Cytokines/Chemokines – Immunology	21	21	http://www.broadinstitute.org/gsea/msigdb/cards/BIOCARTA_IGF1_PATHWAY	0.055309	0.18614	7
GO MICROTUBULE MOTOR ACTIVITY	Molecular function	16	16	http://www.broadinstitute.org/gsea/msigdb/cards/MICROTUBULE_MOTOR_ACTIVITY	0.053289	0.52255	1
GO MICROTUBULE BINDING	Molecular function	33	28	http://www.broadinstitute.org/gsea/msigdb/cards/MICROTUBULE_BINDING	0.047032	2.0968	3
BIOCARTA MEF2D PATHWAY	Apoptosis-Cell Signaling-Expression	23	18	http://www.broadinstitute.org/gsea/msigdb/cards/BIOCARTA_MEF2D_PATHWAY	0.041666	-1.452	3
GO PROTEIN HETERODIMERIZATION ACTIVITY	Molecular function	77	74	http://www.broadinstitute.org/gsea/msigdb/cards/PROTEIN_HETERODIMERIZATION_ACTIVITY	0.040268	6.075	6
GO CARBOHYDRATE BIOSYNTHETIC PROCESS	Biological process	49	44	http://www.broadinstitute.org/gsea/msigdb/cards/CARBOHYDRATE_BIOSYNTHETIC_PROCESS	0.039062	-0.074386	2
BIOCARTA GLEEVEC PATHWAY	Adhesion - Cell Signaling	23	23	http://www.broadinstitute.org/gsea/msigdb/cards/BIOCARTA_GLEEVEC_PATHWAY	0.039004	-0.012236	11
GO LIPID RAFT	Cellular component	29	27	http://www.broadinstitute.org/gsea/msigdb/cards/LIPID_RAFT	0.03859	0.020891	3
GO REGULATION OF MAPKKK CASCADE	Biological process	20	19	http://www.broadinstitute.org/gsea/msigdb/cards/REGULATION_OF_MAPKKK_CASCADE	0.035876	0.076149	2
GO HYDROLASE ACTIVITY ACTING ON CARBON NITROGEN NOT PEPTIDEBONDS	Molecular function	46	44	http://www.broadinstitute.org/gsea/msigdb/cards/HYDROLASE_ACTIVITY_ACTING_ON_CARBON_NITROGEN_NOT_PEPTIDEBONDS	0.033673	4.81	1
KEGG GAP JUNCTION	Cellular Processes	90	75	http://www.broadinstitute.org/gsea/msigdb/cards/KEGG_GAP_JUNCTION	0.029063	-0.11337	13
GO T CELL ACTIVATION	Biological process	44	42	http://www.broadinstitute.org/gsea/msigdb/cards/T_CELL_ACTIVATION	0.028905	-1.1092	3
GO EMBRYONIC DEVELOPMENT	Biological process	58	52	http://www.broadinstitute.org/gsea/msigdb/cards/EMBRYONIC_DEVELOPMENT	0.02782	-0.06379	4
GO VIRAL REPRODUCTION	Biological process	41	40	http://www.broadinstitute.org/gsea/msigdb/cards/VIRAL_REPRODUCTION	0.026539	13.137	2
GO REGULATION OF T CELL ACTIVATION	Biological process	28	28	http://www.broadinstitute.org/gsea/msigdb/cards/REGULATION_OF_T_CELL_ACTIVATION	0.023747	-1.8382	1
GO MICROTUBULE BASED MOVEMENT	Biological process	16	16	http://www.broadinstitute.org/gsea/msigdb/cards/MICROTUBULE_BASED_MOVEMENT	0.023493	0.014714	1
GO NEGATIVE REGULATION OF BINDING	Biological process	18	17	http://www.broadinstitute.org/gsea/msigdb/cards/NEGATIVE_REGULATION_OF_BINDING	0.021384	1.8212	1
GO LIPID TRANSPORT	Biological process	28	28	http://www.broadinstitute.org/gsea/msigdb/cards/LIPID_TRANSPORT	0.0193	-0.025428	0
BIOCARTA IL1R PATHWAY	Cell Signaling-Cytokines/Chemokines – Immunology	33	31	http://www.broadinstitute.org/gsea/msigdb/cards/BIOCARTA_IL1R_PATHWAY	0.017574	-0.29279	2
GO NEGATIVE REGULATION OF TRANSLATION	Biological process	23	19	http://www.broadinstitute.org/gsea/msigdb/cards/NEGATIVE_REGULATION_OF_TRANSLATION	0.017174	-0.093354	2
BIOCARTA NO2IL12 PATHWAY	Cell Activation-Cell Signaling-Cytokines/Chemokines-Immunology	17	15	http://www.broadinstitute.org/gsea/msigdb/cards/BIOCARTA_NO2IL12_PATHWAY	0.017052	-1.4969	1
GO REGULATION OF ENDOCYTOSIS	Biological process	16	16	http://www.broadinstitute.org/gsea/msigdb/cards/REGULATION_OF_ENDOCYTOSIS	0.016636	-0.2143	3
GO NUCLEOBASENUCLEOSIDENUCLEOTIDE KINASE ACTIVITY	Molecular function	25	23	http://www.broadinstitute.org/gsea/msigdb/cards/NUCLEOBASENUCLEOSIDENUCLEOTIDE_KINASE_ACTIVITY	0.016333	0.55994	0
GO ADAPTIVE IMMUNE RESPONSE GO 0002460	Biological process	24	23	http://www.broadinstitute.org/gsea/msigdb/cards/ADAPTIVE_IMMUNE_RESPONSE_GO_0002460	0.01522	-0.94226	2
GO ACTIN FILAMENT BINDING	Molecular function	25	23	http://www.broadinstitute.org/gsea/msigdb/cards/ACTIN_FILAMENT_BINDING	0.014125	0.0031775	3
GO POSITIVE REGULATION OF CELLULAR COMPONENT ORGANIZATION AND BIOGENESIS	Biological process	36	34	http://www.broadinstitute.org/gsea/msigdb/cards/POSITIVE_REGULATION_OF_CELLULAR_COMPONENT_ORGANIZATION_AND_BIOGENESIS	0.013692	-0.33528	3
GO CHROMATIN REMODELING	Biological process	25	21	http://www.broadinstitute.org/gsea/msigdb/cards/CHROMATIN_REMODELING	0.012723	2.8638	3
GO REGULATION OF CYTOKINE PRODUCTION	Biological process	25	22	http://www.broadinstitute.org/gsea/msigdb/cards/REGULATION_OF_CYTOKINE_PRODUCTION	0.012416	0.0066725	2
GO CYTOKINESIS	Biological process	19	18	http://www.broadinstitute.org/gsea/msigdb/cards/CYTOKINESIS	0.011878	9.1256	2
GO ENDONUCLEASE ACTIVITY	Molecular function	25	23	http://www.broadinstitute.org/gsea/msigdb/cards/ENDONUCLEASE_ACTIVITY	0.011189	-0.010389	3
KEGG DRUG METABOLISM OTHER ENZYMES	Metabolism	51	39	http://www.broadinstitute.org/gsea/msigdb/cards/KEGG_DRUG_METABOLISM_OTHER_ENZYMES	0.010969	0.54259	1
GO SERINE TYPE ENDOPEPTIDASE ACTIVITY	Molecular function	41	37	http://www.broadinstitute.org/gsea/msigdb/cards/SERINE_TYPE_ENDOPEPTIDASE_ACTIVITY	0.010514	-3.3703	1
KEGG GALACTOSE METABOLISM	Metabolism	26	25	http://www.broadinstitute.org/gsea/msigdb/cards/KEGG_GALACTOSE_METABOLISM	0.010497	-0.81604	0
GO PROTEIN HOMODIMERIZATION ACTIVITY	Molecular function	121	113	http://www.broadinstitute.org/gsea/msigdb/cards/PROTEIN_HOMODIMERIZATION_ACTIVITY	0.010311	-0.15744	11
GO TRANSMEMBRANE RECEPTOR PROTEIN PHOSPHATASE ACTIVITY	Molecular function	19	19	http://www.broadinstitute.org/gsea/msigdb/cards/TRANSMEMBRANE_RECEPTOR_PROTEIN_PHOSPHATASE_ACTIVITY	0.010002	1.9512	0
GO STRESS ACTIVATED PROTEIN KINASE SIGNALING PATHWAY	Biological process	49	48	http://www.broadinstitute.org/gsea/msigdb/cards/STRESS_ACTIVATED_PROTEIN_KINASE_SIGNALING_PATHWAY	0.0093669	0.14453	2
GO ACTIVATION OF PROTEIN KINASE ACTIVITY	Biological process	28	23	http://www.broadinstitute.org/gsea/msigdb/cards/ACTIVATION_OF_PROTEIN_KINASE_ACTIVITY	0.0080253	0.42953	2
GO RAS GUANYL NUCLEOTIDE EXCHANGE FACTOR ACTIVITY	Molecular function	19	18	http://www.broadinstitute.org/gsea/msigdb/cards/RAS_GUANYL_NUCLEOTIDE_EXCHANGE_FACTOR_ACTIVITY	0.0074606	-1.1506	0
GO NEGATIVE REGULATION OF CELL ADHESION	Biological process	18	17	http://www.broadinstitute.org/gsea/msigdb/cards/NEGATIVE_REGULATION_OF_CELL_ADHESION	0.0055689	-1.7421	3
GO PROTEIN TARGETING	Biological process	109	98	http://www.broadinstitute.org/gsea/msigdb/cards/PROTEIN_TARGETING	0.0046807	-0.51161	8
GO ION TRANSMEMBRANE TRANSPORTER ACTIVITY	Molecular function	278	265	http://www.broadinstitute.org/gsea/msigdb/cards/ION_TRANSMEMBRANE_TRANSPORTER_ACTIVITY	0.0046165	-3.09	3
KEGG ONE CARBON POOL BY FOLATE	Metabolism	17	16	http://www.broadinstitute.org/gsea/msigdb/cards/KEGG_ONE_CARBON_POOL_BY_FOLATE	0.0042321	-0.053607	1
GO RAS GTPASE ACTIVATOR ACTIVITY	Molecular function	29	26	http://www.broadinstitute.org/gsea/msigdb/cards/RAS_GTPASE_ACTIVATOR_ACTIVITY	0.0040598	-0.78365	1
GO NEURON DEVELOPMENT	Biological process	61	60	http://www.broadinstitute.org/gsea/msigdb/cards/NEURON_DEVELOPMENT	0.0036352	0.85894	0
GO ACTIVATION OF JNK ACTIVITY	Biological process	16	16	http://www.broadinstitute.org/gsea/msigdb/cards/ACTIVATION_OF_JNK_ACTIVITY	0.003061	-0.029704	1
GO CARBOHYDRATE CATABOLIC PROCESS	Biological process	24	23	http://www.broadinstitute.org/gsea/msigdb/cards/CARBOHYDRATE_CATABOLIC_PROCESS	0.002666	0.54398	0
GO CHANNEL REGULATOR ACTIVITY	Molecular function	24	22	http://www.broadinstitute.org/gsea/msigdb/cards/CHANNEL_REGULATOR_ACTIVITY	0.0025974	-0.0035221	0
GO STEROID BINDING	Molecular function	18	18	http://www.broadinstitute.org/gsea/msigdb/cards/STEROID_BINDING	0.0022267	-2.1113	0
GO CELL PROJECTION BIOGENESIS	Biological process	25	23	http://www.broadinstitute.org/gsea/msigdb/cards/CELL_PROJECTION_BIOGENESIS	0.0017994	1.9804	1
GO ADAPTIVE IMMUNE RESPONSE	Biological process	25	24	http://www.broadinstitute.org/gsea/msigdb/cards/ADAPTIVE_IMMUNE_RESPONSE	0.0015352	-0.60703	3
KEGG HYPERTROPHIC CARDIOMYOPATHY HCM	Human Diseases	85	82	http://www.broadinstitute.org/gsea/msigdb/cards/KEGG_HYPERTROPHIC_CARDIOMYOPATHY_HCM	0.0010211	1.1847	2
BIOCARTA TOLL PATHWAY	Apoptosis - Cell Signaling – Immunology	37	34	http://www.broadinstitute.org/gsea/msigdb/cards/BIOCARTA_TOLL_PATHWAY	0.00067742	0.020436	3
GO REGULATION OF NEUROTRANSMITTER LEVELS	Biological process	24	22	http://www.broadinstitute.org/gsea/msigdb/cards/REGULATION_OF_NEUROTRANSMITTER_LEVELS	0.00060015	0.45634	0
GO ATPASE ACTIVITY COUPLED	Molecular function	93	85	http://www.broadinstitute.org/gsea/msigdb/cards/ATPASE_ACTIVITY_COUPLED	0.00059413	0.15948	1
GO PROTEASE INHIBITOR ACTIVITY	Molecular function	41	41	http://www.broadinstitute.org/gsea/msigdb/cards/PROTEASE_INHIBITOR_ACTIVITY	0.00054294	-0.0030947	0
GO LEUKOCYTE DIFFERENTIATION	Biological process	38	37	http://www.broadinstitute.org/gsea/msigdb/cards/LEUKOCYTE_DIFFERENTIATION	0.00046674	0.70084	5
GO MOTOR ACTIVITY	Molecular function	28	28	http://www.broadinstitute.org/gsea/msigdb/cards/MOTOR_ACTIVITY	0.00045812	0.12928	2
GO LIPID HOMEOSTASIS	Biological process	16	16	http://www.broadinstitute.org/gsea/msigdb/cards/LIPID_HOMEOSTASIS	0.00023916	-1.3839	0
KEGG GLYOXYLATE AND DICARBOXYLATE METABOLISM	Metabolism	16	15	http://www.broadinstitute.org/gsea/msigdb/cards/KEGG_GLYOXYLATE_AND_DICARBOXYLATE_METABOLISM	0.0002121	0.65268	0
GO SECONDARY METABOLIC PROCESS	Biological process	26	25	http://www.broadinstitute.org/gsea/msigdb/cards/SECONDARY_METABOLIC_PROCESS	0.00020521	0.064627	1
GO RAS GTPASE BINDING	Molecular function	25	23	http://www.broadinstitute.org/gsea/msigdb/cards/RAS_GTPASE_BINDING	0.00017143	-1.0604	1
GO REGULATION OF NUCLEOCYTOPLASMIC TRANSPORT	Biological process	22	19	http://www.broadinstitute.org/gsea/msigdb/cards/REGULATION_OF_NUCLEOCYTOPLASMIC_TRANSPORT	0.00016003	-1.2733	3
GO BASE EXCISION REPAIR	Biological process	17	15	http://www.broadinstitute.org/gsea/msigdb/cards/BASE_EXCISION_REPAIR	0.00010495	5.7607	3
GO POSITIVE REGULATION OF BINDING	Biological process	28	24	http://www.broadinstitute.org/gsea/msigdb/cards/POSITIVE_REGULATION_OF_BINDING	2.15e-05	-0.20235	4
GO POSITIVE REGULATION OF DNA BINDING	Biological process	26	24	http://www.broadinstitute.org/gsea/msigdb/cards/POSITIVE_REGULATION_OF_DNA_BINDING	2.15e-05	-0.20235	4
BIOCARTA EIF4 PATHWAY	Cell Signaling – Expression	24	22	http://www.broadinstitute.org/gsea/msigdb/cards/BIOCARTA_EIF4_PATHWAY	-2.51e-05	-1.2922	5
GO ENDOPEPTIDASE ACTIVITY	Molecular function	117	107	http://www.broadinstitute.org/gsea/msigdb/cards/ENDOPEPTIDASE_ACTIVITY	-0.00029003	-0.15053	2
GO NEGATIVE REGULATION OF PROGRAMMED CELL DEATH	Biological process	151	138	http://www.broadinstitute.org/gsea/msigdb/cards/NEGATIVE_REGULATION_OF_PROGRAMMED_CELL_DEATH	-0.0003032	2.388	12
BIOCARTA VIP PATHWAY	Apoptosis - Cell Signaling – Immunology	29	26	http://www.broadinstitute.org/gsea/msigdb/cards/BIOCARTA_VIP_PATHWAY	-0.00039396	-0.20274	3
BIOCARTA IL3 PATHWAY	Cell Signaling-Cytokines/Chemokines-Immunology	15	15	http://www.broadinstitute.org/gsea/msigdb/cards/BIOCARTA_IL3_PATHWAY	-0.00049215	-1.436	4
GO NUCLEASE ACTIVITY	Molecular function	55	52	http://www.broadinstitute.org/gsea/msigdb/cards/NUCLEASE_ACTIVITY	-0.00052724	0.66763	5
GO ESTABLISHMENT OF PROTEIN LOCALIZATION	Biological process	190	166	http://www.broadinstitute.org/gsea/msigdb/cards/ESTABLISHMENT_OF_PROTEIN_LOCALIZATION	-0.0011703	0.0056233	12
GO GATED CHANNEL ACTIVITY	Molecular function	122	115	http://www.broadinstitute.org/gsea/msigdb/cards/GATED_CHANNEL_ACTIVITY	-0.0012478	-12.372	1
KEGG LEISHMANIA INFECTION	Human Diseases	72	62	http://www.broadinstitute.org/gsea/msigdb/cards/KEGG_LEISHMANIA_INFECTION	-0.0016483	0.28162	4
GO NEGATIVE REGULATION OF CELLULAR COMPONENT ORGANIZATION AND BIOGENESIS	Biological process	29	26	http://www.broadinstitute.org/gsea/msigdb/cards/NEGATIVE_REGULATION_OF_CELLULAR_COMPONENT_ORGANIZATION_AND_BIOGENESIS	-0.0020279	2.5035	4
GO MYOBLAST DIFFERENTIATION	Biological process	17	17	http://www.broadinstitute.org/gsea/msigdb/cards/MYOBLAST_DIFFERENTIATION	-0.0020802	0.0076278	2
GO DIGESTION	Biological process	44	41	http://www.broadinstitute.org/gsea/msigdb/cards/DIGESTION	-0.0026113	0.50216	0
GO HUMORAL IMMUNE RESPONSE	Biological process	32	29	http://www.broadinstitute.org/gsea/msigdb/cards/HUMORAL_IMMUNE_RESPONSE	-0.0030146	-2.1242	3
GO VACUOLE	Cellular component	69	63	http://www.broadinstitute.org/gsea/msigdb/cards/VACUOLE	-0.003204	4.0377	2
GO MEIOSIS I	Biological process	20	16	http://www.broadinstitute.org/gsea/msigdb/cards/MEIOSIS_I	-0.0032272	0.25479	1
GO POLYSACCHARIDE METABOLIC PROCESS	Biological process	18	15	http://www.broadinstitute.org/gsea/msigdb/cards/POLYSACCHARIDE_METABOLIC_PROCESS	-0.003842	-0.44268	0
BIOCARTA CXCR4 PATHWAY	Cell Signaling – Cytokines/Chemokines – Immunology	24	23	http://www.broadinstitute.org/gsea/msigdb/cards/BIOCARTA_CXCR4_PATHWAY	-0.0038554	0.013495	6
GO OXIDOREDUCTASE ACTIVITY ACTING ON THE ALDEHYDE OR OXO GROUP OF DONORSNAD OR NADP AS ACCEPTOR	Molecular function	16	16	http://www.broadinstitute.org/gsea/msigdb/cards/OXIDOREDUCTASE_ACTIVITY_ACTING_ON_THE_ALDEHYDE_OR_OXO_GROUP_OF_DONORSNAD_OR_NADP_AS_ACCEPTOR	-0.0046858	5.944	1
KEGG PANTOTHENATE AND COA BIOSYNTHESIS	Metabolism	16	16	http://www.broadinstitute.org/gsea/msigdb/cards/KEGG_PANTOTHENATE_AND_COA_BIOSYNTHESIS	-0.0048885	-0.041801	0
GO PROTEIN HOMOOLIGOMERIZATION	Biological process	22	20	http://www.broadinstitute.org/gsea/msigdb/cards/PROTEIN_HOMOOLIGOMERIZATION	-0.0056252	-1.153	2
GO HORMONE METABOLIC PROCESS	Biological process	32	29	http://www.broadinstitute.org/gsea/msigdb/cards/HORMONE_METABOLIC_PROCESS	-0.0058641	0.0034243	0
GO L AMINO ACID TRANSMEMBRANE TRANSPORTER ACTIVITY	Molecular function	17	17	http://www.broadinstitute.org/gsea/msigdb/cards/L_AMINO_ACID_TRANSMEMBRANE_TRANSPORTER_ACTIVITY	-0.0076472	0.12464	0
GO OXYGEN AND REACTIVE OXYGEN SPECIES METABOLIC PROCESS	Biological process	20	19	http://www.broadinstitute.org/gsea/msigdb/cards/OXYGEN_AND_REACTIVE_OXYGEN_SPECIES_METABOLIC_PROCESS	-0.0080761	-0.66598	0
GO MEIOTIC CELL CYCLE	Biological process	35	31	http://www.broadinstitute.org/gsea/msigdb/cards/MEIOTIC_CELL_CYCLE	-0.0087761	1.3767	1
GO NEGATIVE REGULATION OF TRANSPORT	Biological process	20	18	http://www.broadinstitute.org/gsea/msigdb/cards/NEGATIVE_REGULATION_OF_TRANSPORT	-0.0087969	0.15047	2
GO SKELETAL MUSCLE DEVELOPMENT	Biological process	31	31	http://www.broadinstitute.org/gsea/msigdb/cards/SKELETAL_MUSCLE_DEVELOPMENT	-0.0090106	-0.85613	3
GO RESPONSE TO EXTRACELLULAR STIMULUS	Biological process	33	31	http://www.broadinstitute.org/gsea/msigdb/cards/RESPONSE_TO_EXTRACELLULAR_STIMULUS	-0.0094	-0.75639	2
KEGG ANTIGEN PROCESSING AND PRESENTATION	Organismal Systems	89	81	http://www.broadinstitute.org/gsea/msigdb/cards/KEGG_ANTIGEN_PROCESSING_AND_PRESENTATION	-0.009519	6.2903	3
BIOCARTA MCALPAIN PATHWAY	Adhesion - Cell Signaling	25	23	http://www.broadinstitute.org/gsea/msigdb/cards/BIOCARTA_MCALPAIN_PATHWAY	-0.011406	1.6496	4
GO TRANSMEMBRANE RECEPTOR PROTEIN TYROSINE KINASE SIGNALING PATHWAY	Biological process	83	77	http://www.broadinstitute.org/gsea/msigdb/cards/TRANSMEMBRANE_RECEPTOR_PROTEIN_TYROSINE_KINASE_SIGNALING_PATHWAY	-0.012192	0.16599	13
BIOCARTA ECM PATHWAY	Adhesion - Cell Signaling	24	23	http://www.broadinstitute.org/gsea/msigdb/cards/BIOCARTA_ECM_PATHWAY	-0.013118	0.0055665	5
KEGG GLYCOSPHINGOLIPID BIOSYNTHESIS LACTO AND NEOLACTO SERIES	Metabolism	26	26	http://www.broadinstitute.org/gsea/msigdb/cards/KEGG_GLYCOSPHINGOLIPID_BIOSYNTHESIS_LACTO_AND_NEOLACTO_SERIES	-0.013142	1.2007	0
GO CALCIUM ION BINDING	Molecular function	104	99	http://www.broadinstitute.org/gsea/msigdb/cards/CALCIUM_ION_BINDING	-0.013386	-0.017153	0
GO NEGATIVE REGULATION OF PROTEIN METABOLIC PROCESS	Biological process	48	44	http://www.broadinstitute.org/gsea/msigdb/cards/NEGATIVE_REGULATION_OF_PROTEIN_METABOLIC_PROCESS	-0.013689	-0.028665	7
BIOCARTA GH PATHWAY	Cell Signaling	28	26	http://www.broadinstitute.org/gsea/msigdb/cards/BIOCARTA_GH_PATHWAY	-0.013904	-0.48095	7
KEGG MELANOMA	Human Diseases	71	71	http://www.broadinstitute.org/gsea/msigdb/cards/KEGG_MELANOMA	-0.015251	6.0834	27
BIOCARTA TEL PATHWAY	Cell Cycle Regulation	18	18	http://www.broadinstitute.org/gsea/msigdb/cards/BIOCARTA_TEL_PATHWAY	-0.015299	-0.32811	8
GO BIOGENIC AMINE METABOLIC PROCESS	Biological process	17	16	http://www.broadinstitute.org/gsea/msigdb/cards/BIOGENIC_AMINE_METABOLIC_PROCESS	-0.016155	0.73307	0
GO GOLGI MEMBRANE	Cellular component	45	37	http://www.broadinstitute.org/gsea/msigdb/cards/GOLGI_MEMBRANE	-0.016631	0.0029288	2
GO PROTEIN AMINO ACID O LINKED GLYCOSYLATION	Biological process	18	18	http://www.broadinstitute.org/gsea/msigdb/cards/PROTEIN_AMINO_ACID_O_LINKED_GLYCOSYLATION	-0.017988	-1.3394	0
GO NEURON PROJECTION	Cellular component	21	19	http://www.broadinstitute.org/gsea/msigdb/cards/NEURON_PROJECTION	-0.018576	-1.6643	1
GO DNA DIRECTED RNA POLYMERASE COMPLEX	Cellular component	18	15	http://www.broadinstitute.org/gsea/msigdb/cards/DNA_DIRECTED_RNA_POLYMERASE_COMPLEX	-0.020504	-0.092415	0
GO RNA POLYMERASE COMPLEX	Cellular component	18	15	http://www.broadinstitute.org/gsea/msigdb/cards/RNA_POLYMERASE_COMPLEX	-0.020504	-0.092415	0
GO NUCLEAR DNA DIRECTED RNA POLYMERASE COMPLEX	Cellular component	18	15	http://www.broadinstitute.org/gsea/msigdb/cards/NUCLEAR_DNA_DIRECTED_RNA_POLYMERASE_COMPLEX	-0.020504	-0.092415	0
KEGG COLORECTAL CANCER	Human Diseases	62	61	http://www.broadinstitute.org/gsea/msigdb/cards/KEGG_COLORECTAL_CANCER	-0.022039	0.34589	22
KEGG APOPTOSIS	Cellular Processes	88	82	http://www.broadinstitute.org/gsea/msigdb/cards/KEGG_APOPTOSIS	-0.022372	0.4108	11
BIOCARTA PPARA PATHWAY	Cell Signaling-Developmental Biology	58	53	http://www.broadinstitute.org/gsea/msigdb/cards/BIOCARTA_PPARA_PATHWAY	-0.02274	-0.11185	9
BIOCARTA NO1 PATHWAY	Cell Activation	33	29	http://www.broadinstitute.org/gsea/msigdb/cards/BIOCARTA_NO1_PATHWAY	-0.024619	-0.29046	3
KEGG LONG TERM DEPRESSION	Organismal Systems	70	66	http://www.broadinstitute.org/gsea/msigdb/cards/KEGG_LONG_TERM_DEPRESSION	-0.025333	0.087325	11
GO JNK CASCADE	Biological process	47	46	http://www.broadinstitute.org/gsea/msigdb/cards/JNK_CASCADE	-0.025472	0.20625	2
GO REGULATION OF TRANSLATION	Biological process	93	75	http://www.broadinstitute.org/gsea/msigdb/cards/REGULATION_OF_TRANSLATION	-0.02645	0.21337	5
GO REGULATION OF HYDROLASE ACTIVITY	Biological process	79	69	http://www.broadinstitute.org/gsea/msigdb/cards/REGULATION_OF_HYDROLASE_ACTIVITY	-0.032393	0.31273	9
GO NEURITE DEVELOPMENT	Biological process	53	53	http://www.broadinstitute.org/gsea/msigdb/cards/NEURITE_DEVELOPMENT	-0.034608	0.0039863	0
GO LIGAND DEPENDENT NUCLEAR RECEPTOR ACTIVITY	Molecular function	25	24	http://www.broadinstitute.org/gsea/msigdb/cards/LIGAND_DEPENDENT_NUCLEAR_RECEPTOR_ACTIVITY	-0.03649	-0.11566	2
GO PIGMENT BIOSYNTHETIC PROCESS	Biological process	17	17	http://www.broadinstitute.org/gsea/msigdb/cards/PIGMENT_BIOSYNTHETIC_PROCESS	-0.037721	-0.018862	1
GO CYSTEINE TYPE ENDOPEPTIDASE ACTIVITY	Molecular function	40	38	http://www.broadinstitute.org/gsea/msigdb/cards/CYSTEINE_TYPE_ENDOPEPTIDASE_ACTIVITY	-0.038512	-0.24335	1
GO NUCLEAR ORGANIZATION AND BIOGENESIS	Biological process	30	26	http://www.broadinstitute.org/gsea/msigdb/cards/NUCLEAR_ORGANIZATION_AND_BIOGENESIS	-0.043127	0.54236	4
GO NEGATIVE REGULATION OF CELLULAR PROTEIN METABOLIC PROCESS	Biological process	45	41	http://www.broadinstitute.org/gsea/msigdb/cards/NEGATIVE_REGULATION_OF_CELLULAR_PROTEIN_METABOLIC_PROCESS	-0.043736	0.046738	6
GO NEGATIVE REGULATION OF APOPTOSIS	Biological process	150	137	http://www.broadinstitute.org/gsea/msigdb/cards/NEGATIVE_REGULATION_OF_APOPTOSIS	-0.044699	1.6412	12
GO NEGATIVE REGULATION OF MULTICELLULAR ORGANISMAL PROCESS	Biological process	32	29	http://www.broadinstitute.org/gsea/msigdb/cards/NEGATIVE_REGULATION_OF_MULTICELLULAR_ORGANISMAL_PROCESS	-0.048121	-1.3785	0
GO ANION TRANSMEMBRANE TRANSPORTER ACTIVITY	Molecular function	59	55	http://www.broadinstitute.org/gsea/msigdb/cards/ANION_TRANSMEMBRANE_TRANSPORTER_ACTIVITY	-0.048266	-2.3504	1
GO RESPONSE TO VIRUS	Biological process	50	47	http://www.broadinstitute.org/gsea/msigdb/cards/RESPONSE_TO_VIRUS	-0.048378	3.9964	2
GO APOPTOTIC NUCLEAR CHANGES	Biological process	19	18	http://www.broadinstitute.org/gsea/msigdb/cards/APOPTOTIC_NUCLEAR_CHANGES	-0.048499	-0.76008	2
BIOCARTA CALCINEURIN PATHWAY	Cell Signaling-Developmental Biology	21	17	http://www.broadinstitute.org/gsea/msigdb/cards/BIOCARTA_CALCINEURIN_PATHWAY	-0.049325	-0.93642	1
BIOCARTA WNT PATHWAY	Cell Signaling-Developmental Biology	26	25	http://www.broadinstitute.org/gsea/msigdb/cards/BIOCARTA_WNT_PATHWAY	-0.04967	0.028608	7
GO NEGATIVE REGULATION OF DNA BINDING	Biological process	17	16	http://www.broadinstitute.org/gsea/msigdb/cards/NEGATIVE_REGULATION_OF_DNA_BINDING	-0.05264	1.064	1
GO PHOSPHORIC DIESTER HYDROLASE ACTIVITY	Molecular function	40	37	http://www.broadinstitute.org/gsea/msigdb/cards/PHOSPHORIC_DIESTER_HYDROLASE_ACTIVITY	-0.052857	0.15917	0
KEGG BIOSYNTHESIS OF UNSATURATED FATTY ACIDS	Metabolism	22	19	http://www.broadinstitute.org/gsea/msigdb/cards/KEGG_BIOSYNTHESIS_OF_UNSATURATED_FATTY_ACIDS	-0.055867	0.45791	0
GO NEGATIVE REGULATION OF CELLULAR BIOSYNTHETIC PROCESS	Biological process	29	25	http://www.broadinstitute.org/gsea/msigdb/cards/NEGATIVE_REGULATION_OF_CELLULAR_BIOSYNTHETIC_PROCESS	-0.056691	-0.070713	3
GO REGULATION OF TRANSCRIPTION FACTOR ACTIVITY	Biological process	40	36	http://www.broadinstitute.org/gsea/msigdb/cards/REGULATION_OF_TRANSCRIPTION_FACTOR_ACTIVITY	-0.059553	0.11476	5
GO REGULATION OF T CELL PROLIFERATION	Biological process	16	16	http://www.broadinstitute.org/gsea/msigdb/cards/REGULATION_OF_T_CELL_PROLIFERATION	-0.059929	-0.49695	0
KEGG VASCULAR SMOOTH MUSCLE CONTRACTION	Organismal Systems	115	110	http://www.broadinstitute.org/gsea/msigdb/cards/KEGG_VASCULAR_SMOOTH_MUSCLE_CONTRACTION	-0.0611	-0.35517	9
GO B CELL ACTIVATION	Biological process	20	19	http://www.broadinstitute.org/gsea/msigdb/cards/B_CELL_ACTIVATION	-0.061383	0.52781	1
GO T CELL PROLIFERATION	Biological process	19	18	http://www.broadinstitute.org/gsea/msigdb/cards/T_CELL_PROLIFERATION	-0.061552	-0.036044	1
GO HOMEOSTASIS OF NUMBER OF CELLS	Biological process	20	19	http://www.broadinstitute.org/gsea/msigdb/cards/HOMEOSTASIS_OF_NUMBER_OF_CELLS	-0.061694	18.918	4
GO POSITIVE REGULATION OF TRANSFERASE ACTIVITY	Biological process	86	76	http://www.broadinstitute.org/gsea/msigdb/cards/POSITIVE_REGULATION_OF_TRANSFERASE_ACTIVITY	-0.061898	-0.085865	8
GO REGULATION OF PROTEIN STABILITY	Biological process	19	16	http://www.broadinstitute.org/gsea/msigdb/cards/REGULATION_OF_PROTEIN_STABILITY	-0.064493	-0.55268	2
GO ENERGY RESERVE METABOLIC PROCESS	Biological process	15	15	http://www.broadinstitute.org/gsea/msigdb/cards/ENERGY_RESERVE_METABOLIC_PROCESS	-0.066654	-1.342	0
KEGG CYSTEINE AND METHIONINE METABOLISM	Metabolism	34	31	http://www.broadinstitute.org/gsea/msigdb/cards/KEGG_CYSTEINE_AND_METHIONINE_METABOLISM	-0.067671	8.5724	1
GO CELL PROJECTION	Cellular component	108	98	http://www.broadinstitute.org/gsea/msigdb/cards/CELL_PROJECTION	-0.068847	0.096481	5
GO ENDOSOME TRANSPORT	Biological process	23	23	http://www.broadinstitute.org/gsea/msigdb/cards/ENDOSOME_TRANSPORT	-0.070955	0.91614	1
BIOCARTA GCR PATHWAY	Cell Signaling	22	19	http://www.broadinstitute.org/gsea/msigdb/cards/BIOCARTA_GCR_PATHWAY	-0.073492	0.016449	4
BIOCARTA ETS PATHWAY	Developmental Biology-Expression	18	18	http://www.broadinstitute.org/gsea/msigdb/cards/BIOCARTA_ETS_PATHWAY	-0.077853	-0.013037	2
KEGG TOLL LIKE RECEPTOR SIGNALING PATHWAY	Organismal Systems	102	98	http://www.broadinstitute.org/gsea/msigdb/cards/KEGG_TOLL_LIKE_RECEPTOR_SIGNALING_PATHWAY	-0.078674	-0.5661	10
GO PHOSPHOTRANSFERASE ACTIVITY PHOSPHATE GROUP AS ACCEPTOR	Molecular function	18	17	http://www.broadinstitute.org/gsea/msigdb/cards/PHOSPHOTRANSFERASE_ACTIVITY_PHOSPHATE_GROUP_AS_ACCEPTOR	-0.083421	-0.053958	0
GO INTERACTION WITH HOST	Biological process	17	17	http://www.broadinstitute.org/gsea/msigdb/cards/INTERACTION_WITH_HOST	-0.085435	-0.12179	0
GO AMINO SUGAR METABOLIC PROCESS	Biological process	19	18	http://www.broadinstitute.org/gsea/msigdb/cards/AMINO_SUGAR_METABOLIC_PROCESS	-0.087882	0.87809	0
GO REGULATION OF ANGIOGENESIS	Biological process	26	24	http://www.broadinstitute.org/gsea/msigdb/cards/REGULATION_OF_ANGIOGENESIS	-0.088498	-1.6583	4
GO MAINTENANCE OF LOCALIZATION	Biological process	22	20	http://www.broadinstitute.org/gsea/msigdb/cards/MAINTENANCE_OF_LOCALIZATION	-0.090598	-0.34814	1
GO DETECTION OF ABIOTIC STIMULUS	Biological process	19	19	http://www.broadinstitute.org/gsea/msigdb/cards/DETECTION_OF_ABIOTIC_STIMULUS	-0.090908	-0.11243	0
GO AXONOGENESIS	Biological process	43	43	http://www.broadinstitute.org/gsea/msigdb/cards/AXONOGENESIS	-0.091621	-0.025652	0
GO RECEPTOR MEDIATED ENDOCYTOSIS	Biological process	33	31	http://www.broadinstitute.org/gsea/msigdb/cards/RECEPTOR_MEDIATED_ENDOCYTOSIS	-0.09367	0.0016595	4
BIOCARTA CDMAC PATHWAY	Cell Signaling-Immunology	16	15	http://www.broadinstitute.org/gsea/msigdb/cards/BIOCARTA_CDMAC_PATHWAY	-0.099965	0.39017	5
BIOCARTA INTRINSIC PATHWAY	Metabolism	23	23	http://www.broadinstitute.org/gsea/msigdb/cards/BIOCARTA_INTRINSIC_PATHWAY	-0.10338	-4.4107	0
GO SECRETION	Biological process	178	161	http://www.broadinstitute.org/gsea/msigdb/cards/SECRETION	-0.1036	3.0302	0
GO EARLY ENDOSOME	Cellular component	18	17	http://www.broadinstitute.org/gsea/msigdb/cards/EARLY_ENDOSOME	-0.10466	-1.6107	1
GO RESPONSE TO UV	Biological process	26	24	http://www.broadinstitute.org/gsea/msigdb/cards/RESPONSE_TO_UV	-0.10915	2.7659	6
GO VOLTAGE GATED CALCIUM CHANNEL COMPLEX	Cellular component	15	15	http://www.broadinstitute.org/gsea/msigdb/cards/VOLTAGE_GATED_CALCIUM_CHANNEL_COMPLEX	-0.11276	0.47872	0
GO CHEMOKINE ACTIVITY	Molecular function	42	40	http://www.broadinstitute.org/gsea/msigdb/cards/CHEMOKINE_ACTIVITY	-0.11318	-1.6368	0
GO CHEMOKINE RECEPTOR BINDING	Molecular function	43	41	http://www.broadinstitute.org/gsea/msigdb/cards/CHEMOKINE_RECEPTOR_BINDING	-0.11623	-1.5259	0
KEGG HEDGEHOG SIGNALING PATHWAY	Environmental Information Processing	56	53	http://www.broadinstitute.org/gsea/msigdb/cards/KEGG_HEDGEHOG_SIGNALING_PATHWAY	-0.11793	4.0571	2
GO CELL CORTEX PART	Cellular component	24	23	http://www.broadinstitute.org/gsea/msigdb/cards/CELL_CORTEX_PART	-0.11855	-1.0915	3
BIOCARTA IGF1R PATHWAY	Apoptosis - Cell Signaling	23	23	http://www.broadinstitute.org/gsea/msigdb/cards/BIOCARTA_IGF1R_PATHWAY	-0.1197	-0.73586	7
GO CELL STRUCTURE DISASSEMBLY DURING APOPTOSIS	Biological process	18	17	http://www.broadinstitute.org/gsea/msigdb/cards/CELL_STRUCTURE_DISASSEMBLY_DURING_APOPTOSIS	-0.12054	-0.80859	2
BIOCARTA DEATH PATHWAY	Apoptosis	33	32	http://www.broadinstitute.org/gsea/msigdb/cards/BIOCARTA_DEATH_PATHWAY	-0.12101	-0.27616	2
GO NEUROGENESIS	Biological process	93	90	http://www.broadinstitute.org/gsea/msigdb/cards/NEUROGENESIS	-0.13059	0.63366	3
GO NEURON APOPTOSIS	Biological process	17	16	http://www.broadinstitute.org/gsea/msigdb/cards/NEURON_APOPTOSIS	-0.13085	-0.97068	2
GO EPIDERMAL GROWTH FACTOR RECEPTOR SIGNALING PATHWAY	Biological process	22	19	http://www.broadinstitute.org/gsea/msigdb/cards/EPIDERMAL_GROWTH_FACTOR_RECEPTOR_SIGNALING_PATHWAY	-0.13086	0.18253	4
BIOCARTA HSP27 PATHWAY	Apoptosis-Cell Activation	15	15	http://www.broadinstitute.org/gsea/msigdb/cards/BIOCARTA_HSP27_PATHWAY	-0.13099	0.46424	2
BIOCARTA MTOR PATHWAY	Cell Signaling	23	21	http://www.broadinstitute.org/gsea/msigdb/cards/BIOCARTA_MTOR_PATHWAY	-0.13145	-1.0922	7
GO POSITIVE REGULATION OF TRANSCRIPTION FACTOR ACTIVITY	Biological process	24	22	http://www.broadinstitute.org/gsea/msigdb/cards/POSITIVE_REGULATION_OF_TRANSCRIPTION_FACTOR_ACTIVITY	-0.13205	-0.5934	4
GO REGULATION OF TRANSFERASE ACTIVITY	Biological process	161	149	http://www.broadinstitute.org/gsea/msigdb/cards/REGULATION_OF_TRANSFERASE_ACTIVITY	-0.13426	-0.73163	15
GO REGULATION OF DNA BINDING	Biological process	47	43	http://www.broadinstitute.org/gsea/msigdb/cards/REGULATION_OF_DNA_BINDING	-0.13493	0.80077	6
GO RHO GTPASE ACTIVATOR ACTIVITY	Molecular function	19	16	http://www.broadinstitute.org/gsea/msigdb/cards/RHO_GTPASE_ACTIVATOR_ACTIVITY	-0.13589	-0.96966	0
GO NEGATIVE REGULATION OF DNA METABOLIC PROCESS	Biological process	18	17	http://www.broadinstitute.org/gsea/msigdb/cards/NEGATIVE_REGULATION_OF_DNA_METABOLIC_PROCESS	-0.13646	0.77116	3
GO CELL MATURATION	Biological process	16	15	http://www.broadinstitute.org/gsea/msigdb/cards/CELL_MATURATION	-0.13813	1.8428	1
KEGG NATURAL KILLER CELL MEDIATED CYTOTOXICITY	Organismal Systems	137	129	http://www.broadinstitute.org/gsea/msigdb/cards/KEGG_NATURAL_KILLER_CELL_MEDIATED_CYTOTOXICITY	-0.14057	-0.42467	14
GO SYMPORTER ACTIVITY	Molecular function	31	31	http://www.broadinstitute.org/gsea/msigdb/cards/SYMPORTER_ACTIVITY	-0.14194	0.48091	0
GO INSULIN RECEPTOR SIGNALING PATHWAY	Biological process	19	17	http://www.broadinstitute.org/gsea/msigdb/cards/INSULIN_RECEPTOR_SIGNALING_PATHWAY	-0.1458	-0.23997	3
KEGG THYROID CANCER	Human Diseases	29	29	http://www.broadinstitute.org/gsea/msigdb/cards/KEGG_THYROID_CANCER	-0.1461	0.004251	21
BIOCARTA STATHMIN PATHWAY	Cell Cycle Regulation	19	18	http://www.broadinstitute.org/gsea/msigdb/cards/BIOCARTA_STATHMIN_PATHWAY	-0.14807	-0.17806	1
GO CELLULAR MORPHOGENESIS DURING DIFFERENTIATION	Biological process	49	49	http://www.broadinstitute.org/gsea/msigdb/cards/CELLULAR_MORPHOGENESIS_DURING_DIFFERENTIATION	-0.15282	-0.47578	0
GO CATION TRANSMEMBRANE TRANSPORTER ACTIVITY	Molecular function	213	206	http://www.broadinstitute.org/gsea/msigdb/cards/CATION_TRANSMEMBRANE_TRANSPORTER_ACTIVITY	-0.16267	-0.26977	1
GO CHROMATIN MODIFICATION	Biological process	55	45	http://www.broadinstitute.org/gsea/msigdb/cards/CHROMATIN_MODIFICATION	-0.16604	-0.077733	7
GO RNA CATABOLIC PROCESS	Biological process	23	22	http://www.broadinstitute.org/gsea/msigdb/cards/RNA_CATABOLIC_PROCESS	-0.17196	-1.1341	0
KEGG CYTOSOLIC DNA SENSING PATHWAY	Organismal Systems	56	51	http://www.broadinstitute.org/gsea/msigdb/cards/KEGG_CYTOSOLIC_DNA_SENSING_PATHWAY	-0.17558	0.80914	0
GO MUSCLE CELL DIFFERENTIATION	Biological process	22	20	http://www.broadinstitute.org/gsea/msigdb/cards/MUSCLE_CELL_DIFFERENTIATION	-0.17668	0.76435	2
BIOCARTA CSK PATHWAY	Cell Signaling – Immunology	24	23	http://www.broadinstitute.org/gsea/msigdb/cards/BIOCARTA_CSK_PATHWAY	-0.17763	3.1978	6
BIOCARTA TFF PATHWAY	Adhesion - Apoptosis - Cell Signaling	21	21	http://www.broadinstitute.org/gsea/msigdb/cards/BIOCARTA_TFF_PATHWAY	-0.18022	-0.87206	6
KEGG AMYOTROPHIC LATERAL SCLEROSIS ALS	Human Diseases	53	49	http://www.broadinstitute.org/gsea/msigdb/cards/KEGG_AMYOTROPHIC_LATERAL_SCLEROSIS_ALS	-0.18057	0.25442	4
GO MAGNESIUM ION BINDING	Molecular function	62	54	http://www.broadinstitute.org/gsea/msigdb/cards/MAGNESIUM_ION_BINDING	-0.1849	0.97177	5
GO ADENYLATE CYCLASE ACTIVATION	Biological process	19	19	http://www.broadinstitute.org/gsea/msigdb/cards/ADENYLATE_CYCLASE_ACTIVATION	-0.18985	1.3802	1
BIOCARTA IL2RB PATHWAY	Cell Signaling-Cytokines/Chemokines- Immunology	38	38	http://www.broadinstitute.org/gsea/msigdb/cards/BIOCARTA_IL2RB_PATHWAY	-0.19132	-0.1088	12
GO TRANSFORMING GROWTH FACTOR BETA RECEPTOR SIGNALING PATHWAY	Biological process	36	35	http://www.broadinstitute.org/gsea/msigdb/cards/TRANSFORMING_GROWTH_FACTOR_BETA_RECEPTOR_SIGNALING_PATHWAY	-0.19201	0.073305	1
BIOCARTA NFKB PATHWAY	Cell Signaling – Expression	23	22	http://www.broadinstitute.org/gsea/msigdb/cards/BIOCARTA_NFKB_PATHWAY	-0.19737	0.0024304	2
GO HYDROLASE ACTIVITY ACTING ON CARBON NITROGEN NOT PEPTIDEBONDSIN CYCLIC AMIDINES	Molecular function	16	16	http://www.broadinstitute.org/gsea/msigdb/cards/HYDROLASE_ACTIVITY_ACTING_ON_CARBON_NITROGEN_NOT_PEPTIDEBONDSIN_CYCLIC_AMIDINES	-0.19969	-0.29238	1
GO ICOSANOID METABOLIC PROCESS	Biological process	17	17	http://www.broadinstitute.org/gsea/msigdb/cards/ICOSANOID_METABOLIC_PROCESS	-0.20057	-0.69218	1
BIOCARTA P53 PATHWAY	Apoptosis-Cell Cycle Regulation-Cell Signaling-Expression	16	16	http://www.broadinstitute.org/gsea/msigdb/cards/BIOCARTA_P53_PATHWAY	-0.21231	70.871	8
GO LIPOPROTEIN BINDING	Molecular function	18	17	http://www.broadinstitute.org/gsea/msigdb/cards/LIPOPROTEIN_BINDING	-0.21304	-0.086678	0
GO THIOLESTER HYDROLASE ACTIVITY	Molecular function	16	16	http://www.broadinstitute.org/gsea/msigdb/cards/THIOLESTER_HYDROLASE_ACTIVITY	-0.21656	-0.80532	0
GO AUXILIARY TRANSPORT PROTEIN ACTIVITY	Molecular function	26	24	http://www.broadinstitute.org/gsea/msigdb/cards/AUXILIARY_TRANSPORT_PROTEIN_ACTIVITY	-0.2181	-0.6932	0
GO AXON GUIDANCE	Biological process	22	22	http://www.broadinstitute.org/gsea/msigdb/cards/AXON_GUIDANCE	-0.21922	-0.91103	0
GO REGULATION OF SMALL GTPASE MEDIATED SIGNAL TRANSDUCTION	Biological process	23	21	http://www.broadinstitute.org/gsea/msigdb/cards/REGULATION_OF_SMALL_GTPASE_MEDIATED_SIGNAL_TRANSDUCTION	-0.22302	-0.22266	4
GO ANION TRANSPORT	Biological process	31	29	http://www.broadinstitute.org/gsea/msigdb/cards/ANION_TRANSPORT	-0.22398	-0.33946	1
GO NEGATIVE REGULATION OF BIOSYNTHETIC PROCESS	Biological process	30	26	http://www.broadinstitute.org/gsea/msigdb/cards/NEGATIVE_REGULATION_OF_BIOSYNTHETIC_PROCESS	-0.23231	-0.14565	3
GO REGULATION OF CATALYTIC ACTIVITY	Biological process	276	252	http://www.broadinstitute.org/gsea/msigdb/cards/REGULATION_OF_CATALYTIC_ACTIVITY	-0.23989	-0.032869	24
BIOCARTA RELA PATHWAY	Cell Signaling-Expression	16	16	http://www.broadinstitute.org/gsea/msigdb/cards/BIOCARTA_RELA_PATHWAY	-0.24534	-0.38387	2
GO DNA DAMAGE CHECKPOINT	Biological process	20	17	http://www.broadinstitute.org/gsea/msigdb/cards/DNA_DAMAGE_CHECKPOINT	-0.2587	4.7127	2
GO LYTIC VACUOLE	Cellular component	61	55	http://www.broadinstitute.org/gsea/msigdb/cards/LYTIC_VACUOLE	-0.26162	2.0454	2
GO LYSOSOME	Cellular component	61	55	http://www.broadinstitute.org/gsea/msigdb/cards/LYSOSOME	-0.26162	2.0454	2
GO CHROMATIN ASSEMBLY	Biological process	16	16	http://www.broadinstitute.org/gsea/msigdb/cards/CHROMATIN_ASSEMBLY	-0.2676	0.10977	1
GO PERINUCLEAR REGION OF CYTOPLASM	Cellular component	54	50	http://www.broadinstitute.org/gsea/msigdb/cards/PERINUCLEAR_REGION_OF_CYTOPLASM	-0.26831	-0.29416	5
BIOCARTA PTEN PATHWAY	Apoptosis-Cell Cycle Regulation-Cell Signaling	18	17	http://www.broadinstitute.org/gsea/msigdb/cards/BIOCARTA_PTEN_PATHWAY	-0.27159	-0.41175	4
BIOCARTA INSULIN PATHWAY	Cell Signaling – Cytokines/Chemokines	22	22	http://www.broadinstitute.org/gsea/msigdb/cards/BIOCARTA_INSULIN_PATHWAY	-0.27344	-0.067853	7
BIOCARTA CASPASE PATHWAY	Apoptosis	23	22	http://www.broadinstitute.org/gsea/msigdb/cards/BIOCARTA_CASPASE_PATHWAY	-0.27392	1.6106	2
GO PROTEIN N TERMINUS BINDING	Molecular function	38	38	http://www.broadinstitute.org/gsea/msigdb/cards/PROTEIN_N_TERMINUS_BINDING	-0.28412	0.095703	11
GO REGULATION OF RAS PROTEIN SIGNAL TRANSDUCTION	Biological process	19	17	http://www.broadinstitute.org/gsea/msigdb/cards/REGULATION_OF_RAS_PROTEIN_SIGNAL_TRANSDUCTION	-0.29209	0.0012559	4
GO SH3 SH2 ADAPTOR ACTIVITY	Molecular function	43	42	http://www.broadinstitute.org/gsea/msigdb/cards/SH3_SH2_ADAPTOR_ACTIVITY	-0.29336	-0.22278	2
BIOCARTA TH1TH2 PATHWAY	Cell Activation – Immunology	19	19	http://www.broadinstitute.org/gsea/msigdb/cards/BIOCARTA_TH1TH2_PATHWAY	-0.30549	-0.39866	1
KEGG LONG TERM POTENTIATION	Organismal Systems	70	68	http://www.broadinstitute.org/gsea/msigdb/cards/KEGG_LONG_TERM_POTENTIATION	-0.30651	-0.32531	10
GO T CELL DIFFERENTIATION	Biological process	15	15	http://www.broadinstitute.org/gsea/msigdb/cards/T_CELL_DIFFERENTIATION	-0.30776	-0.080893	2
GO DNA INTEGRITY CHECKPOINT	Biological process	24	20	http://www.broadinstitute.org/gsea/msigdb/cards/DNA_INTEGRITY_CHECKPOINT	-0.30947	21.864	2
GO UNFOLDED PROTEIN BINDING	Molecular function	42	40	http://www.broadinstitute.org/gsea/msigdb/cards/UNFOLDED_PROTEIN_BINDING	-0.3183	2.1391	1
KEGG GLYCOSPHINGOLIPID BIOSYNTHESIS GANGLIO SERIES	Metabolism	15	15	http://www.broadinstitute.org/gsea/msigdb/cards/KEGG_GLYCOSPHINGOLIPID_BIOSYNTHESIS_GANGLIO_SERIES	-0.32691	0.12968	0
BIOCARTA CERAMIDE PATHWAY	Cell Signaling	22	21	http://www.broadinstitute.org/gsea/msigdb/cards/BIOCARTA_CERAMIDE_PATHWAY	-0.33071	4.5782	4
GO ACETYLGLUCOSAMINYLTRANSFERASE ACTIVITY	Molecular function	16	16	http://www.broadinstitute.org/gsea/msigdb/cards/ACETYLGLUCOSAMINYLTRANSFERASE_ACTIVITY	-0.33772	-0.025376	1
GO BRAIN DEVELOPMENT	Biological process	51	44	http://www.broadinstitute.org/gsea/msigdb/cards/BRAIN_DEVELOPMENT	-0.34052	-0.25357	3
GO SECRETION BY CELL	Biological process	116	100	http://www.broadinstitute.org/gsea/msigdb/cards/SECRETION_BY_CELL	-0.34906	0.41286	0
BIOCARTA SPPA PATHWAY	Cell Activation	22	19	http://www.broadinstitute.org/gsea/msigdb/cards/BIOCARTA_SPPA_PATHWAY	-0.35381	0.70713	4
BIOCARTA AKT PATHWAY	Adhesion – Apoptosis	22	19	http://www.broadinstitute.org/gsea/msigdb/cards/BIOCARTA_AKT_PATHWAY	-0.35516	-0.87194	3
GO REGULATION OF PROTEIN KINASE ACTIVITY	Biological process	155	144	http://www.broadinstitute.org/gsea/msigdb/cards/REGULATION_OF_PROTEIN_KINASE_ACTIVITY	-0.35821	-0.80382	15
GO TRANSFERASE ACTIVITY TRANSFERRING ALKYL OR ARYLOTHER THAN METHYLGROUPS	Molecular function	30	30	http://www.broadinstitute.org/gsea/msigdb/cards/TRANSFERASE_ACTIVITY_TRANSFERRING_ALKYL_OR_ARYLOTHER_THAN_METHYLGROUPS	-0.36674	0.82172	0
GO CELL PROJECTION PART	Cellular component	19	18	http://www.broadinstitute.org/gsea/msigdb/cards/CELL_PROJECTION_PART	-0.36877	0.00023734	0
GO EXOPEPTIDASE ACTIVITY	Molecular function	32	28	http://www.broadinstitute.org/gsea/msigdb/cards/EXOPEPTIDASE_ACTIVITY	-0.37164	0.098642	0
GO ER NUCLEAR SIGNALING PATHWAY	Biological process	16	16	http://www.broadinstitute.org/gsea/msigdb/cards/ER_NUCLEAR_SIGNALING_PATHWAY	-0.40375	-0.55447	1
GO SOLUBLE FRACTION	Cellular component	161	149	http://www.broadinstitute.org/gsea/msigdb/cards/SOLUBLE_FRACTION	-0.4071	0.65364	1
GO STEROID BIOSYNTHETIC PROCESS	Biological process	23	23	http://www.broadinstitute.org/gsea/msigdb/cards/STEROID_BIOSYNTHETIC_PROCESS	-0.41395	-0.15667	0
GO LYMPHOCYTE DIFFERENTIATION	Biological process	26	25	http://www.broadinstitute.org/gsea/msigdb/cards/LYMPHOCYTE_DIFFERENTIATION	-0.42276	-0.021333	3
GO ANTI APOPTOSIS	Biological process	118	109	http://www.broadinstitute.org/gsea/msigdb/cards/ANTI_APOPTOSIS	-0.42466	0.055514	7
GO ENZYME LINKED RECEPTOR PROTEIN SIGNALING PATHWAY	Biological process	140	132	http://www.broadinstitute.org/gsea/msigdb/cards/ENZYME_LINKED_RECEPTOR_PROTEIN_SIGNALING_PATHWAY	-0.43466	0.20481	14
GO JAK STAT CASCADE	Biological process	31	30	http://www.broadinstitute.org/gsea/msigdb/cards/JAK_STAT_CASCADE	-0.43817	-0.50729	4
GO RESPONSE TO HORMONE STIMULUS	Biological process	33	32	http://www.broadinstitute.org/gsea/msigdb/cards/RESPONSE_TO_HORMONE_STIMULUS	-0.44479	0.050468	4
GO CASPASE ACTIVATION	Biological process	26	24	http://www.broadinstitute.org/gsea/msigdb/cards/CASPASE_ACTIVATION	-0.44546	2.0162	4
KEGG PHENYLALANINE METABOLISM	Metabolism	18	18	http://www.broadinstitute.org/gsea/msigdb/cards/KEGG_PHENYLALANINE_METABOLISM	-0.46078	0.00014929	0
GO MITOTIC CELL CYCLE CHECKPOINT	Biological process	21	21	http://www.broadinstitute.org/gsea/msigdb/cards/MITOTIC_CELL_CYCLE_CHECKPOINT	-0.46564	13.021	3
GO RESPONSE TO RADIATION	Biological process	60	57	http://www.broadinstitute.org/gsea/msigdb/cards/RESPONSE_TO_RADIATION	-0.47344	4.7157	9
BIOCARTA CELLCYCLE PATHWAY	Cell Cycle Regulation - Cell Signaling – Cytokines/Chemokines	23	22	http://www.broadinstitute.org/gsea/msigdb/cards/BIOCARTA_CELLCYCLE_PATHWAY	-0.47443	18.479	9
GO COVALENT CHROMATIN MODIFICATION	Biological process	25	20	http://www.broadinstitute.org/gsea/msigdb/cards/COVALENT_CHROMATIN_MODIFICATION	-0.48352	0.018456	4
GO PROTEIN IMPORT	Biological process	62	55	http://www.broadinstitute.org/gsea/msigdb/cards/PROTEIN_IMPORT	-0.48637	-1.2813	7
GO REGULATION OF KINASE ACTIVITY	Biological process	157	146	http://www.broadinstitute.org/gsea/msigdb/cards/REGULATION_OF_KINASE_ACTIVITY	-0.48733	-0.79565	15
KEGG VASOPRESSIN REGULATED WATER REABSORPTION	Organismal Systems	44	44	http://www.broadinstitute.org/gsea/msigdb/cards/KEGG_VASOPRESSIN_REGULATED_WATER_REABSORPTION	-0.49037	-0.93293	4
BIOCARTA TID PATHWAY	Cell Signaling	19	19	http://www.broadinstitute.org/gsea/msigdb/cards/BIOCARTA_TID_PATHWAY	-0.49226	2.1672	4
GO EXONUCLEASE ACTIVITY	Molecular function	19	18	http://www.broadinstitute.org/gsea/msigdb/cards/EXONUCLEASE_ACTIVITY	-0.49437	-0.16064	1
GO REGULATION OF DNA REPLICATION	Biological process	20	18	http://www.broadinstitute.org/gsea/msigdb/cards/REGULATION_OF_DNA_REPLICATION	-0.50231	6.4336	1
GO CENTRAL NERVOUS SYSTEM DEVELOPMENT	Biological process	123	112	http://www.broadinstitute.org/gsea/msigdb/cards/CENTRAL_NERVOUS_SYSTEM_DEVELOPMENT	-0.50647	0.098121	5
BIOCARTA SPRY PATHWAY	Cell Signaling	18	18	http://www.broadinstitute.org/gsea/msigdb/cards/BIOCARTA_SPRY_PATHWAY	-0.50863	2.4249	5
GO CORTICAL CYTOSKELETON	Cellular component	20	19	http://www.broadinstitute.org/gsea/msigdb/cards/CORTICAL_CYTOSKELETON	-0.51418	-1.6506	2
GO NEGATIVE REGULATION OF SIGNAL TRANSDUCTION	Biological process	37	32	http://www.broadinstitute.org/gsea/msigdb/cards/NEGATIVE_REGULATION_OF_SIGNAL_TRANSDUCTION	-0.52287	-0.18642	7
GO ACTIN FILAMENT ORGANIZATION	Biological process	24	22	http://www.broadinstitute.org/gsea/msigdb/cards/ACTIN_FILAMENT_ORGANIZATION	-0.53676	-0.05437	3
GO VOLTAGE GATED CALCIUM CHANNEL ACTIVITY	Molecular function	18	18	http://www.broadinstitute.org/gsea/msigdb/cards/VOLTAGE_GATED_CALCIUM_CHANNEL_ACTIVITY	-0.55229	-0.016676	0
GO REGULATION OF TRANSLATIONAL INITIATION	Biological process	31	19	http://www.broadinstitute.org/gsea/msigdb/cards/REGULATION_OF_TRANSLATIONAL_INITIATION	-0.55598	0.002098	1
GO POSITIVE REGULATION OF CASPASE ACTIVITY	Biological process	30	26	http://www.broadinstitute.org/gsea/msigdb/cards/POSITIVE_REGULATION_OF_CASPASE_ACTIVITY	-0.55605	0.43018	5
GO CATION TRANSPORT	Biological process	147	139	http://www.broadinstitute.org/gsea/msigdb/cards/CATION_TRANSPORT	-0.55768	-2.7866	1
GO POSITIVE REGULATION OF CELL CYCLE	Biological process	16	15	http://www.broadinstitute.org/gsea/msigdb/cards/POSITIVE_REGULATION_OF_CELL_CYCLE	-0.5607	-0.91435	3
GO MICROTUBULE ORGANIZING CENTER ORGANIZATION AND BIOGENESIS	Biological process	16	15	http://www.broadinstitute.org/gsea/msigdb/cards/MICROTUBULE_ORGANIZING_CENTER_ORGANIZATION_AND_BIOGENESIS	-0.58526	7.0259	2
BIOCARTA CCR3 PATHWAY	Cytokines/Chemokines - Hematopoiesis – Immunology	23	22	http://www.broadinstitute.org/gsea/msigdb/cards/BIOCARTA_CCR3_PATHWAY	-0.63013	0.10783	5
GO REGULATION OF BINDING	Biological process	58	51	http://www.broadinstitute.org/gsea/msigdb/cards/REGULATION_OF_BINDING	-0.63538	1.5213	7
BIOCARTA GATA3 PATHWAY	Cytokines/Chemokines-Expression-Immunology	16	15	http://www.broadinstitute.org/gsea/msigdb/cards/BIOCARTA_GATA3_PATHWAY	-0.64748	-0.58458	3
GO SPHINGOLIPID METABOLIC PROCESS	Biological process	29	23	http://www.broadinstitute.org/gsea/msigdb/cards/SPHINGOLIPID_METABOLIC_PROCESS	-0.66415	-0.12515	0
GO SPINDLE POLE	Cellular component	18	17	http://www.broadinstitute.org/gsea/msigdb/cards/SPINDLE_POLE	-0.67507	10.409	1
GO CYSTEINE TYPE PEPTIDASE ACTIVITY	Molecular function	54	52	http://www.broadinstitute.org/gsea/msigdb/cards/CYSTEINE_TYPE_PEPTIDASE_ACTIVITY	-0.67796	-1.4826	1
GO KINASE BINDING	Molecular function	70	65	http://www.broadinstitute.org/gsea/msigdb/cards/KINASE_BINDING	-0.68145	0.11252	8
GO DEVELOPMENTAL MATURATION	Biological process	18	17	http://www.broadinstitute.org/gsea/msigdb/cards/DEVELOPMENTAL_MATURATION	-0.68508	3.9244	1
BIOCARTA NOS1 PATHWAY	Cell Signaling	24	20	http://www.broadinstitute.org/gsea/msigdb/cards/BIOCARTA_NOS1_PATHWAY	-0.69092	-1.8877	1
GO HISTONE MODIFICATION	Biological process	24	19	http://www.broadinstitute.org/gsea/msigdb/cards/HISTONE_MODIFICATION	-0.69668	0.060865	4
GO EXOCYTOSIS	Biological process	25	23	http://www.broadinstitute.org/gsea/msigdb/cards/EXOCYTOSIS	-0.71984	-1.0158	0
BIOCARTA CHEMICAL PATHWAY	Apoptosis	22	21	http://www.broadinstitute.org/gsea/msigdb/cards/BIOCARTA_CHEMICAL_PATHWAY	-0.74526	0.0013929	4
GO OUTER MEMBRANE	Cellular component	25	24	http://www.broadinstitute.org/gsea/msigdb/cards/OUTER_MEMBRANE	-0.7614	0.22688	2
GO LAMELLIPODIUM	Cellular component	25	22	http://www.broadinstitute.org/gsea/msigdb/cards/LAMELLIPODIUM	-0.77271	-0.29732	1
GO SERINE TYPE ENDOPEPTIDASE INHIBITOR ACTIVITY	Molecular function	25	25	http://www.broadinstitute.org/gsea/msigdb/cards/SERINE_TYPE_ENDOPEPTIDASE_INHIBITOR_ACTIVITY	-0.77918	-0.32979	0
GO RESPONSE TO DRUG	Biological process	22	20	http://www.broadinstitute.org/gsea/msigdb/cards/RESPONSE_TO_DRUG	-0.80482	0.013243	2
GO APICAL PART OF CELL	Cellular component	17	16	http://www.broadinstitute.org/gsea/msigdb/cards/APICAL_PART_OF_CELL	-0.81231	-0.44127	0
GO RESPONSE TO TEMPERATURE STIMULUS	Biological process	16	16	http://www.broadinstitute.org/gsea/msigdb/cards/RESPONSE_TO_TEMPERATURE_STIMULUS	-0.82988	-0.030239	1
GO PROTEIN KINASE BINDING	Molecular function	62	58	http://www.broadinstitute.org/gsea/msigdb/cards/PROTEIN_KINASE_BINDING	-0.85864	0.19136	7
GO NEGATIVE REGULATION OF TRANSFERASE ACTIVITY	Biological process	35	34	http://www.broadinstitute.org/gsea/msigdb/cards/NEGATIVE_REGULATION_OF_TRANSFERASE_ACTIVITY	-0.85985	-0.30867	5
GO ACTIVATION OF NF KAPPAB TRANSCRIPTION FACTOR	Biological process	18	16	http://www.broadinstitute.org/gsea/msigdb/cards/ACTIVATION_OF_NF_KAPPAB_TRANSCRIPTION_FACTOR	-0.87048	-1.1777	3
GO EMBRYONIC MORPHOGENESIS	Biological process	17	17	http://www.broadinstitute.org/gsea/msigdb/cards/EMBRYONIC_MORPHOGENESIS	-0.87425	-0.5949	1
GO APOPTOTIC PROGRAM	Biological process	60	55	http://www.broadinstitute.org/gsea/msigdb/cards/APOPTOTIC_PROGRAM	-0.87539	6.4837	5
GO GLUTAMATE SIGNALING PATHWAY	Biological process	17	17	http://www.broadinstitute.org/gsea/msigdb/cards/GLUTAMATE_SIGNALING_PATHWAY	-0.87826	-0.54067	0
GO DNA CATABOLIC PROCESS	Biological process	23	22	http://www.broadinstitute.org/gsea/msigdb/cards/DNA_CATABOLIC_PROCESS	-0.88476	-0.098531	6
GO PATTERN SPECIFICATION PROCESS	Biological process	31	28	http://www.broadinstitute.org/gsea/msigdb/cards/PATTERN_SPECIFICATION_PROCESS	-0.88805	1.9189	1
GO MOLECULAR ADAPTOR ACTIVITY	Molecular function	49	48	http://www.broadinstitute.org/gsea/msigdb/cards/MOLECULAR_ADAPTOR_ACTIVITY	-0.90815	-0.14646	2
GO METAL ION TRANSPORT	Biological process	117	111	http://www.broadinstitute.org/gsea/msigdb/cards/METAL_ION_TRANSPORT	-0.92897	-3.7426	1
BIOCARTA SHH PATHWAY	Cell Signaling-Developmetal Biology	16	16	http://www.broadinstitute.org/gsea/msigdb/cards/BIOCARTA_SHH_PATHWAY	-0.95299	-0.77318	3
GO CALCIUM CHANNEL ACTIVITY	Molecular function	33	32	http://www.broadinstitute.org/gsea/msigdb/cards/CALCIUM_CHANNEL_ACTIVITY	-0.98076	-0.76936	0
GO EXTRACELLULAR STRUCTURE ORGANIZATION AND BIOGENESIS	Biological process	32	30	http://www.broadinstitute.org/gsea/msigdb/cards/EXTRACELLULAR_STRUCTURE_ORGANIZATION_AND_BIOGENESIS	-0.99843	-0.023799	2
GO DI TRI VALENT INORGANIC CATION TRANSMEMBRANE TRANSPORTER ACTIVITY	Molecular function	22	22	http://www.broadinstitute.org/gsea/msigdb/cards/DI___TRI_VALENT_INORGANIC_CATION_TRANSMEMBRANE_TRANSPORTER_ACTIVITY	-1.0171	-0.0013537	0
GO RESPONSE TO STRESS	Biological process	508	467	http://www.broadinstitute.org/gsea/msigdb/cards/RESPONSE_TO_STRESS	-1.0364	55.87	38
GO CYTOPLASMIC VESICLE	Cellular component	119	105	http://www.broadinstitute.org/gsea/msigdb/cards/CYTOPLASMIC_VESICLE	-1.0532	0.0027191	4
GO ANTIGEN BINDING	Molecular function	28	23	http://www.broadinstitute.org/gsea/msigdb/cards/ANTIGEN_BINDING	-1.074	0.0057776	2
GO ORGANELLE OUTER MEMBRANE	Cellular component	24	23	http://www.broadinstitute.org/gsea/msigdb/cards/ORGANELLE_OUTER_MEMBRANE	-1.0772	0.019695	2
GO RESPONSE TO LIGHT STIMULUS	Biological process	46	44	http://www.broadinstitute.org/gsea/msigdb/cards/RESPONSE_TO_LIGHT_STIMULUS	-1.0885	0.9341	7
GO NEGATIVE REGULATION OF MAP KINASE ACTIVITY	Biological process	17	17	http://www.broadinstitute.org/gsea/msigdb/cards/NEGATIVE_REGULATION_OF_MAP_KINASE_ACTIVITY	-1.1018	1.3553	1
GO REGULATION OF CATABOLIC PROCESS	Biological process	16	16	http://www.broadinstitute.org/gsea/msigdb/cards/REGULATION_OF_CATABOLIC_PROCESS	-1.1049	0.0062359	2
GO DEOXYRIBONUCLEASE ACTIVITY	Molecular function	22	22	http://www.broadinstitute.org/gsea/msigdb/cards/DEOXYRIBONUCLEASE_ACTIVITY	-1.1084	-0.19388	2
GO RESPONSE TO ABIOTIC STIMULUS	Biological process	89	86	http://www.broadinstitute.org/gsea/msigdb/cards/RESPONSE_TO_ABIOTIC_STIMULUS	-1.1246	5.0682	10
GO REGULATION OF ACTION POTENTIAL	Biological process	17	17	http://www.broadinstitute.org/gsea/msigdb/cards/REGULATION_OF_ACTION_POTENTIAL	-1.1268	-0.63087	1
BIOCARTA TPO PATHWAY	Cell Signaling – Cytokines/Chemokines	24	23	http://www.broadinstitute.org/gsea/msigdb/cards/BIOCARTA_TPO_PATHWAY	-1.1327	-1.8654	9
KEGG DORSO VENTRAL AXIS FORMATION	Organismal Systems	25	23	http://www.broadinstitute.org/gsea/msigdb/cards/KEGG_DORSO_VENTRAL_AXIS_FORMATION	-1.1509	-0.17857	6
GO VOLTAGE GATED CHANNEL ACTIVITY	Molecular function	73	71	http://www.broadinstitute.org/gsea/msigdb/cards/VOLTAGE_GATED_CHANNEL_ACTIVITY	-1.1645	-4.7371	1
GO ION TRANSPORT	Biological process	185	175	http://www.broadinstitute.org/gsea/msigdb/cards/ION_TRANSPORT	-1.1666	-13.015	3
GO CELLULAR COMPONENT DISASSEMBLY	Biological process	33	32	http://www.broadinstitute.org/gsea/msigdb/cards/CELLULAR_COMPONENT_DISASSEMBLY	-1.1845	-0.32089	5
BIOCARTA IL12 PATHWAY	Cell Signaling – Cytokines/Chemokines – Immunology	23	21	http://www.broadinstitute.org/gsea/msigdb/cards/BIOCARTA_IL12_PATHWAY	-1.2063	-0.10375	5
GO VESICLE	Cellular component	124	109	http://www.broadinstitute.org/gsea/msigdb/cards/VESICLE	-1.2255	0.042542	4
GO NEGATIVE REGULATION OF CATALYTIC ACTIVITY	Biological process	69	68	http://www.broadinstitute.org/gsea/msigdb/cards/NEGATIVE_REGULATION_OF_CATALYTIC_ACTIVITY	-1.2347	-0.82221	6
GO PROTEIN OLIGOMERIZATION	Biological process	40	35	http://www.broadinstitute.org/gsea/msigdb/cards/PROTEIN_OLIGOMERIZATION	-1.2419	0.026872	4
KEGG CHEMOKINE SIGNALING PATHWAY	Organismal Systems	190	173	http://www.broadinstitute.org/gsea/msigdb/cards/KEGG_CHEMOKINE_SIGNALING_PATHWAY	-1.2523	0.0058324	16
GO REGULATION OF MAP KINASE ACTIVITY	Biological process	67	63	http://www.broadinstitute.org/gsea/msigdb/cards/REGULATION_OF_MAP_KINASE_ACTIVITY	-1.313	0.10604	4
GO CYTOPLASMIC MEMBRANE BOUND VESICLE	Cellular component	115	102	http://www.broadinstitute.org/gsea/msigdb/cards/CYTOPLASMIC_MEMBRANE_BOUND_VESICLE	-1.3197	0.050877	4
GO REGULATION OF HEART CONTRACTION	Biological process	25	24	http://www.broadinstitute.org/gsea/msigdb/cards/REGULATION_OF_HEART_CONTRACTION	-1.3218	-0.80521	0
GO ACTIVATION OF MAPK ACTIVITY	Biological process	41	37	http://www.broadinstitute.org/gsea/msigdb/cards/ACTIVATION_OF_MAPK_ACTIVITY	-1.3413	-0.2054	1
GO MEMBRANE BOUND VESICLE	Cellular component	117	104	http://www.broadinstitute.org/gsea/msigdb/cards/MEMBRANE_BOUND_VESICLE	-1.348	0.2682	4
BIOCARTA NKCELLS PATHWAY	Immunology	20	18	http://www.broadinstitute.org/gsea/msigdb/cards/BIOCARTA_NKCELLS_PATHWAY	-1.3581	0.021345	5
GO ION BINDING	Molecular function	273	254	http://www.broadinstitute.org/gsea/msigdb/cards/ION_BINDING	-1.3695	0.90333	13
GO REGULATION OF MOLECULAR FUNCTION	Biological process	324	294	http://www.broadinstitute.org/gsea/msigdb/cards/REGULATION_OF_MOLECULAR_FUNCTION	-1.3805	0.010709	30
GO CATION BINDING	Molecular function	213	202	http://www.broadinstitute.org/gsea/msigdb/cards/CATION_BINDING	-1.3865	3.5817	9
GO PROTEIN BINDING BRIDGING	Molecular function	59	58	http://www.broadinstitute.org/gsea/msigdb/cards/PROTEIN_BINDING_BRIDGING	-1.4485	-0.015029	3
GO POSITIVE REGULATION OF MAP KINASE ACTIVITY	Biological process	47	43	http://www.broadinstitute.org/gsea/msigdb/cards/POSITIVE_REGULATION_OF_MAP_KINASE_ACTIVITY	-1.4914	-0.47725	3
GO GLYCOLIPID METABOLIC PROCESS	Biological process	16	16	http://www.broadinstitute.org/gsea/msigdb/cards/GLYCOLIPID_METABOLIC_PROCESS	-1.4916	-2.7802	0
GO STRUCTURAL CONSTITUENT OF MUSCLE	Molecular function	33	31	http://www.broadinstitute.org/gsea/msigdb/cards/STRUCTURAL_CONSTITUENT_OF_MUSCLE	-1.5445	0.50359	2
GO ESTABLISHMENT AND OR MAINTENANCE OF CELL POLARITY	Biological process	19	19	http://www.broadinstitute.org/gsea/msigdb/cards/ESTABLISHMENT_AND_OR_MAINTENANCE_OF_CELL_POLARITY	-1.5991	-0.39757	0
BIOCARTA MITOCHONDRIA PATHWAY	Apoptosis	21	18	http://www.broadinstitute.org/gsea/msigdb/cards/BIOCARTA_MITOCHONDRIA_PATHWAY	-1.6199	0.017396	2
GO GLUTAMATE RECEPTOR ACTIVITY	Molecular function	20	20	http://www.broadinstitute.org/gsea/msigdb/cards/GLUTAMATE_RECEPTOR_ACTIVITY	-1.6694	-0.014173	0
BIOCARTA CK1 PATHWAY	Cell Signaling	17	17	http://www.broadinstitute.org/gsea/msigdb/cards/BIOCARTA_CK1_PATHWAY	-1.7357	-0.51654	1
GO METAL ION TRANSMEMBRANE TRANSPORTER ACTIVITY	Molecular function	147	141	http://www.broadinstitute.org/gsea/msigdb/cards/METAL_ION_TRANSMEMBRANE_TRANSPORTER_ACTIVITY	-1.8047	-11.468	1
GO VOLTAGE GATED POTASSIUM CHANNEL COMPLEX	Cellular component	40	40	http://www.broadinstitute.org/gsea/msigdb/cards/VOLTAGE_GATED_POTASSIUM_CHANNEL_COMPLEX	-1.8842	-6.4188	1
GO VOLTAGE GATED CATION CHANNEL ACTIVITY	Molecular function	66	65	http://www.broadinstitute.org/gsea/msigdb/cards/VOLTAGE_GATED_CATION_CHANNEL_ACTIVITY	-2.0824	-4.8145	1
GO CATION CHANNEL ACTIVITY	Molecular function	119	114	http://www.broadinstitute.org/gsea/msigdb/cards/CATION_CHANNEL_ACTIVITY	-2.1159	-19.313	1
GO MONOVALENT INORGANIC CATION TRANSPORT	Biological process	94	89	http://www.broadinstitute.org/gsea/msigdb/cards/MONOVALENT_INORGANIC_CATION_TRANSPORT	-2.3541	-0.22522	1
GO VOLTAGE GATED POTASSIUM CHANNEL ACTIVITY	Molecular function	36	36	http://www.broadinstitute.org/gsea/msigdb/cards/VOLTAGE_GATED_POTASSIUM_CHANNEL_ACTIVITY	-2.3681	-3.1501	1
KEGG MATURITY ONSET DIABETES OF THE YOUNG	Human Diseases	25	19	http://www.broadinstitute.org/gsea/msigdb/cards/KEGG_MATURITY_ONSET_DIABETES_OF_THE_YOUNG	-2.654	-0.14121	0
GO POTASSIUM CHANNEL ACTIVITY	Molecular function	50	49	http://www.broadinstitute.org/gsea/msigdb/cards/POTASSIUM_CHANNEL_ACTIVITY	-2.8065	-2.7258	1
GO POTASSIUM ION TRANSPORT	Biological process	58	58	http://www.broadinstitute.org/gsea/msigdb/cards/POTASSIUM_ION_TRANSPORT	-4.0185	-4.5696	1

## Sheet: Sheet2
4	0001	1110	divergent responding	1				419.38		182.36
4	0001	1110	divergent responding	1				0.062688		4.9726
4	0001	1110	divergent responding	1				-0.542		7.5362
4	0011	1100	divergent responding	1				-0.3354		40.207
4	0001	1110	divergent responding	1				-0.023519		1.959
4	0001	1110	divergent responding	1				-1.5505		14.875
4	0001	1110	divergent responding	1				-0.066231		1.2612
4	0100	1011	divergent responding	1				-2.9046		201.15
4	0001	1110	divergent responding	1				-0.22528		13.078
4	0010	1101	divergent responding	1				-0.95728		3.9199
3	0100	0011	divergent responding	0				39.099		26.132
3	1001	0010	divergent responding	-1				52.804		59.667
3	1001	0010	divergent responding	-1				-0.012442		2.9921
3	1101	0110	divergent responding	-1				92.093		17.603
3	0001	0110	divergent responding	0				-0.07927		2.9768
3	1011	0110	divergent responding	-1				-0.092464		48.672
3	1110	0011	divergent responding	-1				-12.796		94.46
3	1001	0010	divergent responding	-1				1.8612		17.433
3	1001	0010	divergent responding	-1				111.19		3.1077
3	1001	1110	divergent responding	0				105.67		4.601
3	1011	1100	divergent responding	0				-1.1642		38.738
3	0110	0001	divergent responding	0				16.931		125.6
3	0001	0110	divergent responding	0				21.87		155.22
3	1001	1110	divergent responding	0				9.1806		19.94
3	0001	1010	divergent responding	1				-2.2031		3.6996
3	0110	1011	divergent responding	1				-0.00010739		0.096016
3	0110	0001	divergent responding	0				0.13489		2.4984
3	0001	1100	divergent responding	1				1.906		6.7217
3	0011	1000	divergent responding	1				-13.295		187.24
3	1100	0010	divergent responding	-1				0.46584		0.7995
3	0001	1010	divergent responding	1				6.4298		4.0639
3	0110	1000	divergent responding	1				28.505		26.675
3	1010	0001	divergent responding	-1				-0.1243		0.091855
3	0101	1011	divergent responding	1				-0.072861		0.20984
3	1011	0101	divergent responding	-1				138.43		93.966
3	1010	0100	divergent responding	-1				-0.1164		2.5827
3	1010	0100	divergent responding	-1				5.7037		28.077
3	0001	1100	divergent responding	1				-22.295		3.8699
3	0001	1100	divergent responding	1				1.8118		24.834
3	1000	0011	divergent responding	-1				1.5955		27.512
3	0010	1100	divergent responding	1				0.15792		0.82294
3	0010	1100	divergent responding	1				-1.6377		56.626
3	0101	1000	divergent responding	1				-6.0519		3.4041
3	1000	0011	divergent responding	-1				-0.023603		0.23617
3	0001	0110	divergent responding	0				-4.8053		11.764
3	0001	0110	divergent responding	0				-22.081		1.3197
3	1001	0111	divergent responding	-1				-1.5377		2.3824
3	1001	0010	divergent responding	-1				33.858		32.944
3	1100	0001	divergent responding	-1				-0.35388		0.32667
3	0101	0010	divergent responding	0				89.562		120.71
3	0101	0010	divergent responding	0				-8.8596		108.12
3	0100	0011	divergent responding	0				-0.0077766		3.4203
3	1000	0101	divergent responding	-1				-0.0042748		4.0131
3	0011	1000	divergent responding	1				-0.0082917		0.85374
3	0010	1100	divergent responding	1				0.48434		9.1174
3	1001	0100	divergent responding	-1				-12.372		-0.0012478
2	1001	0011	divergent responding	-1				3.6762		10.233
2	0100	0001	divergent responding	0				0.042542		-1.2255
2	1000	0010	divergent responding	-1				4.0321		6.7369
2	1011	1000	divergent responding	0				0.016255		8.7311
2	0001	1011	divergent responding	1				-0.15053		-0.00029003
2	0001	0010	divergent responding	0				0.0027191		-1.0532
2	1000	0010	divergent responding	-1				0.2682		-1.348
2	1101	0111	divergent responding	-1				18.568		46.8
2	0001	0100	divergent responding	0				-0.16879		53.14
2	1000	0010	divergent responding	-1				55.272		84.013
2	1000	0001	divergent responding	-1				7.3921		0.69832
2	0001	0100	divergent responding	0				0.41286		-0.34906
2	1000	1110	divergent responding	0				-0.66629		25.223
2	1000	0100	divergent responding	-1				59.255		78.37
2	0001	1000	divergent responding	1				-0.63312		2.7044
2	0010	1110	divergent responding	1				-0.51161		0.0046807
2	1110	0010	divergent responding	-1				4.5414		1.7164
2	1000	0100	divergent responding	-1				-0.61141		26.822
2	0001	0010	divergent responding	0				-0.29461		1.5161
2	0010	1110	divergent responding	1				-0.31748		2.4099
2	1000	0001	divergent responding	-1				2.9971		5.9233
2	1000	0001	divergent responding	-1				0.52808		1.9701
2	1000	0100	divergent responding	-1				0.15948		0.00059413
2	1000	0001	divergent responding	-1				60.422		52.372
2	0111	1101	divergent responding	1				0.71949		28.125
2	0010	1110	divergent responding	1				0.22069		10.085
2	1010	0110	divergent responding	-1				-0.68368		21.926
2	1000	1011	divergent responding	0				1.5134		0.19694
2	0001	1000	divergent responding	1				-0.085865		-0.061898
2	1110	0010	divergent responding	-1				-0.25964		9.8936
2	0100	1110	divergent responding	1				1.8089		4.835
2	1000	0001	divergent responding	-1				0.16026		19.99
2	1000	0010	divergent responding	-1				-3.3405		1.6851
2	0010	1110	divergent responding	1				1.8357		18.601
2	0100	0010	divergent responding	0				-0.51354		17.242
2	1000	0100	divergent responding	-1				-0.26385		21.201
2	1000	1110	divergent responding	0				-0.20964		13.75
2	1000	0010	divergent responding	-1				0.8627		4.4952
2	1000	0010	divergent responding	-1				-0.37831		1.8925
2	0001	1101	divergent responding	1				-0.20421		5.2726
2	0010	0100	divergent responding	0				-0.088682		4.1267
2	0010	1110	divergent responding	1				0.70668		10.405
2	0001	0100	divergent responding	0				1.6227		2.9561
2	0010	1110	divergent responding	1				2.0454		-0.26162
2	1000	0010	divergent responding	-1				2.0454		-0.26162
2	1000	0010	divergent responding	-1				0.022493		1.6547
2	1000	0010	divergent responding	-1				0.97177		-0.1849
2	1110	1000	divergent responding	0				-0.51508		2.209
2	1000	0010	divergent responding	-1				-1.4826		-0.67796
2	1000	0100	divergent responding	-1				-1.6565		39.667
2	0001	1000	divergent responding	1				-0.29416		-0.26831
2	0001	1000	divergent responding	1				-0.99199		1.5271
2	0001	0010	divergent responding	0				-2.7542		26.198
2	0010	0001	divergent responding	0				-0.084439		0.92755
2	1010	0110	divergent responding	-1				9.4582		4.9617
2	1011	1110	divergent responding	0				3.0048		18.488
2	1000	0010	divergent responding	-1				-0.03297		0.65128
2	1000	0001	divergent responding	-1				0.16777		0.3121
2	0001	0010	divergent responding	0				0.69249		34.478
2	1000	0100	divergent responding	-1				0.23542		20.245
2	1000	0001	divergent responding	-1				-0.50038		9.7947
2	0100	1110	divergent responding	1				-0.19532		24.135
2	0100	0001	divergent responding	0				0.040053		1.2627
2	0100	0001	divergent responding	0				0.26847		5.8587
2	0100	0001	divergent responding	0				1.8354		3.5633
2	0001	0010	divergent responding	0				-0.074386		0.039062
2	0010	0001	divergent responding	0				0.93882		17.727
2	1000	0001	divergent responding	-1				-0.20773		0.50537
2	0010	1110	divergent responding	1				0.0028893		16.542
2	0100	0111	divergent responding	0				-0.57378		5.6807
2	0010	0100	divergent responding	0				-0.062367		1.0609
2	1000	0010	divergent responding	-1				-0.1934		0.64742
2	0100	0010	divergent responding	0				-0.0030947		0.00054294
2	1000	0010	divergent responding	-1				-0.72339		9.9492
2	1000	0100	divergent responding	-1				4.2475		1.7723
2	0010	0001	divergent responding	0				1.5658		6.4333
2	0010	1000	divergent responding	1				13.137		0.026539
2	1000	0010	divergent responding	-1				0.15015		8.8739
2	1000	0010	divergent responding	-1				2.7108		12.244
2	0010	0100	divergent responding	0				-1.7036		1.243
2	0001	1000	divergent responding	1				-2.9339		3.8516
2	0001	0111	divergent responding	0				7.5242		12.823
2	0100	0111	divergent responding	0				0.65774		1.589
2	0001	0100	divergent responding	0				-0.24335		-0.038512
2	0001	1000	divergent responding	1				-0.21631		1.9168
2	0010	0001	divergent responding	0				-0.32201		6.2639
2	1000	0100	divergent responding	-1				0.70084		0.00046674
2	0001	0010	divergent responding	0				0.073071		0.35476
2	0010	1000	divergent responding	1				-0.23962		0.10387
2	0001	1000	divergent responding	1				1.9055		1.6799
2	1000	0100	divergent responding	-1				-1.3537		16.061
2	1000	0100	divergent responding	-1				36.219		4.8229
2	0001	1000	divergent responding	1				-3.654		3.4698
2	1000	0100	divergent responding	-1				5.3634		2.9336
2	0010	1000	divergent responding	1				-0.26547		10.969
2	1000	0100	divergent responding	-1				4.1834		29.231
2	0111	0010	divergent responding	0				8.4552		5.3456
2	1011	1000	divergent responding	0				0.27581		6.2618
2	0100	1000	divergent responding	1				-0.18642		-0.52287
2	1110	1000	divergent responding	0				-0.52625		35.994
2	0100	0010	divergent responding	0				24.423		3.2153
2	0100	0111	divergent responding	0				6.9802		5.0948
2	1110	0010	divergent responding	-1				5.837		23.543
2	0010	0001	divergent responding	0				-0.34282		0.079713
2	0001	1000	divergent responding	1				-0.023799		-0.99843
2	0001	1000	divergent responding	1				-1.3785		-0.048121
2	0100	1000	divergent responding	1				1.0175		28.378
2	0001	1000	divergent responding	1				-0.50547		33.695
2	0100	0010	divergent responding	0				-0.32011		0.37633
2	0001	1011	divergent responding	1				-0.87353		94.798
2	1000	0010	divergent responding	-1				0.098642		-0.37164
2	0010	0100	divergent responding	0				-0.61181		26.32
2	0010	0100	divergent responding	0				6.8915		6.3079
2	1000	1110	divergent responding	0				0.00022717		6.1633
2	0100	1000	divergent responding	1				4.0687		4.832
2	0001	0100	divergent responding	0				0.040409		0.28307
2	0001	0111	divergent responding	0				-0.33641		33.735
2	0001	0010	divergent responding	0				0.0038717		1.8089
2	0010	1000	divergent responding	1				-0.0045673		9.2328
2	0100	0111	divergent responding	0				0.013455		7.4246
2	1000	0001	divergent responding	-1				0.00054974		2.5375
2	1000	0010	divergent responding	-1				-1.4407		3.5052
2	1000	0100	divergent responding	-1				-0.43702		0.31048
2	1011	0010	divergent responding	-1				0.97724		9.305
2	1011	0010	divergent responding	-1				0.0057998		2.7835
2	1110	0111	divergent responding	-1				-0.60703		0.0015352
2	0010	1000	divergent responding	1				27.433		4.1695
2	1000	0100	divergent responding	-1				0.31379		11.027
2	0010	1000	divergent responding	1				-0.9547		3.5742
2	1011	0111	divergent responding	-1				-0.096327		14.444
2	0001	0100	divergent responding	0				-0.94226		0.01522
1	0101	0111	divergent responding	0				2.7995		10.799
1	1010	0010	divergent responding	-1				0.91614		-0.070955
1	1010	1000	divergent responding	0				1.9804		0.0017994
1	1010	1000	divergent responding	0				0.54398		0.002666
1	1100	1101	divergent responding	0				-0.15667		-0.41395
1	0101	0111	divergent responding	0				0.42953		0.0080253
1	1010	1110	divergent responding	0				-0.05437		-0.53676
1	1000	1010	divergent responding	0				6.9641		0.8268
1	0011	0010	divergent responding	0				1.9843		0.40303
1	0001	0101	divergent responding	0				0.52657		0.056247
1	1001	0001	divergent responding	-1				-1.5139		0.075073
1	1000	1010	divergent responding	0				0.87343		14.908
1	0010	0011	divergent responding	0				-0.54408		4.2187
1	1010	0010	divergent responding	-1				-1.0134		2.4305
1	0101	0111	divergent responding	0				-0.54408		4.2187
1	1010	1000	divergent responding	0				-1.0134		2.4305
1	0011	0010	divergent responding	0				-0.22266		-0.22302
1	0110	0010	divergent responding	0				0.00028395		10.003
1	0110	0100	divergent responding	0				-0.0036789		8.5252
1	1100	1000	divergent responding	0				29.961		11.182
1	0011	0010	divergent responding	0				0.018456		-0.48352
1	0011	0010	divergent responding	0				12.194		2.7308
1	0110	0100	divergent responding	0				-0.89096		17.405
1	0100	0110	divergent responding	0				-0.10245		0.58242
1	0001	0101	divergent responding	0				0.076149		0.035876
1	0011	0001	divergent responding	0				0.52781		-0.061383
1	1000	1010	divergent responding	0				0.066028		18.781
1	0001	0101	divergent responding	0				-0.18787		0.69402
1	1010	1000	divergent responding	0				-0.18787		0.69402
1	0101	0100	divergent responding	0				2.0009		5.7656
1	0101	0001	divergent responding	0				0.00023734		-0.36877
1	0101	0111	divergent responding	0				12.847		5.8351
1	1000	1100	divergent responding	0				5.1406		0.44685
1	1100	1000	divergent responding	0				0.15047		-0.0087969
1	1011	1010	divergent responding	0				6.4336		-0.50231
1	0100	0110	divergent responding	0				-0.76008		-0.048499
1	0101	0111	divergent responding	0				0.9694		3.6291
1	1001	1000	divergent responding	0				-0.32287		8.2391
1	0010	0011	divergent responding	0				-0.015002		8.6782
1	0100	0101	divergent responding	0				-1.6107		-0.10466
1	0101	0001	divergent responding	0				-1.0561		1.0136
1	0100	1100	divergent responding	1				-0.80859		-0.12054
1	1001	1000	divergent responding	0				-1.0591		11.777
1	0011	0010	divergent responding	0				0.0012559		-0.29209
1	0010	1010	divergent responding	1				0.00086599		4.4811
1	0010	1010	divergent responding	1				-0.5949		-0.87425
1	1000	1100	divergent responding	0				0.1307		4.3409
1	1100	1000	divergent responding	0				-0.44127		-0.81231
1	0011	0010	divergent responding	0				-2.7802		-1.4916
1	0001	0011	divergent responding	0				-0.0032851		1.3983
1	1000	1100	divergent responding	0				-0.97068		-0.13085
1	1000	1100	divergent responding	0				0.37173		2.0744
1	1100	0100	divergent responding	-1				0.01415		0.27179
								0.47872		-0.11276
								0.51321		10.977
								0.51321		10.977
								0.13556		2.4385
								0.26885		4.2591
								-0.011373		11.629
								-1.0779		0.75627
								1.2214		3.3087
								-0.23516		17.12
								0.00092351		19.142
								-26.686		330.33
								9.0593		9.5773
								0.0058324		-1.2523
								-2.5637		0.26452
								0.76632		102.81
								-0.42467		-0.14057
								2.4326		1.859
								11.029		3.2942
								-9.5187		839.33
								3.6145		7.9096
								-0.5661		-0.078674
								3.3921		0.30781
								-0.076951		5.7329
								-0.11337		0.029063
								-0.44977		1.2419
								0.56632		0.68212
								-0.41264		0.54449
								3.9204		1.6568
								5.6373		2.9973
								-1.5582		38.838
								-0.10813		0.10715
								0.23327		0.22664
								-0.10592		8.0163
								1.7852		18.445
								-0.067694		0.63082
								16.629		5.1438
								-5.493		39.076
								-0.55168		24.988
								-0.16977		0.2501
								3.5075		28.293
								-0.066774		0.1802
								-1.2324		5.5073
								-0.27327		0.56781
								0.022348		9.8242
								-0.0056576		3.2633
								13.17		2.9328
								-0.64811		19.407
								0.12078		14.133
								0.17657		6.2824
								1.2693		10.628
								0.0022316		0.2121
								1.7319		14.827
								-3.2226		5.2849
								-0.81604		0.010497
								-0.0013323		0.57754
								9.8595		2.5719
								0.56237		0.42271
								0.19367		0.17935
								-0.54649		4.3555
								-1.7165		1.0593
								0.12968		-0.32691
								-0.11185		-0.02274
								-1.8864		2.15
								-1.2355		0.10502
								0.29003		18.963
								0.13127		8.9528
								-0.70779		3.4504
								0.00096841		1.2805
								1.7254		2.9954
								-1.0213		1.1416
								0.97823		0.68825
								0.020436		0.00067742
								-0.017039		2.9511
								-1.6427		1.4425
								-0.18244		4.4291
								-0.29279		0.017574
								-1.4049		1.9899
								-0.0064586		15.394
								0.026997		1.4488
								-0.45503		0.12105
								-0.28831		0.35236
								0.24294		30.261
								-0.48095		-0.013904
								0.039005		6.8942
								-0.44299		6.2259
								-0.01325		1.1136
								0.013495		-0.0038554
								0.0055665		-0.013118
								-0.012236		0.039004
								1.6496		-0.011406
								-0.73586		-0.1197
								-0.85866		10.468
								-1.5494		1.3131
								-1.8654		-1.1327
								0.10783		-0.63013
								-0.52733		0.25758
								-0.52548		0.18292
								-0.067853		-0.27344
								-1.2922		-2.51e-05
								-0.037025		1.2011
								-1.0922		-0.13145
								-0.87206		-0.18022
								0.70193		25.336
								0.017396		-1.6199
								2.4249		-0.50863
								0.43077		22.527
								-0.61784		0.46304
								-0.24919		0.94074
								-0.41175		-0.27159
								-0.18271		0.33526
								-1.6543		7.827
								-0.38387		-0.24534
								-0.48217		28.373
								-0.98793		0.14609
								-0.77318		-0.95299
								0.51741		3.9217
								-1.436		-0.00049215
								-0.34345		1.9553
								16.056		6.8525
								3.1846		0.070868
								314.25		1091
								39.824		621.38
								39.824		621.38
								32.702		17.217
								423.66		1387.7
								572.88		104.79
								136.31		107.37
								21.307		52.733
								21.307		52.733
								375.4		161.97
								142.18		39.543
								276.79		469.6
								113.31		65.299
								93.93		14.912
								116.07		20.348
								56.596		174.4
								77.404		148.9
								65.065		105.03
								112.56		190.59
								100.43		26.368
								75.186		135.72
								42.616		21.079
								144.86		72.879
								144.86		72.879
								6.1203		5.3629
								16.864		14.952
								13.904		0.89789
								11.695		21.607
								10.717		0.68451
								17.996		4.1637
								339.77		963.69
								16.198		15.706
								100.79		115.04
								790.8		1374
								471.44		821.29
								60.632		130.21
								69.918		40.439
								1.8758		21.134
								13.42		106.47
								447.4		62.79
								65.67		21.342
								242.05		94.323
								-0.11518		44.94
								0.023189		0.93345
								4.5807		23.511
								3.5817		-1.3865
								4.3011		32.027
								1.996		28.533
								4.428		85.375
								38.413		8.7371
								0.0056233		-0.0011703
								5.299		68.581
								0.65364		-0.4071
								0.18582		2.5307
								1.7242		44.444
								98.181		18.524
								98.181		18.524
								1.4576		1.9165
								58.458		7.332
								27.168		0.55487
								-0.017153		-0.013386
								6.1334		8.8804
								0.12371		20.269
								11.559		0.55439
								370.2		47.389
								39.824		1.2493
								42.131		0.18806
								-0.54058		8.6092
								-0.46356		27.708
								62.71		0.37987
								0.0055377		1.6905
								99.713		69.405
								2.8044		0.16057
								0.3811		27.822
								-0.48219		13.375
								3.1e-06		8.3551
								3.0708		0.17941
								-0.0018983		9.1352
								0.90106		2.522
								2.4319		13.803
								0.66763		-0.00052724
								2.0839		21.544
								6.9505		47.406
								4.0889		2.57
								3.9964		-0.048378
								-0.077733		-0.16604
								12.96		4.6891
								5.0715		1.0169
								-0.25357		-0.34052
								138.44		0.7448
								4.81		0.033673
								0.80077		-0.13493
								0.015608		0.080381
								-0.22278		-0.29336
								0.17122		1.4477
								1.3174		2.4944
								-0.72453		8.6063
								2.1391		-0.3183
								32.959		0.41986
								9.1568		1.8963
								-0.018536		0.12079
								1.1084		12.805
								-0.028775		2.9878
								0.0029288		-0.016631
								-0.1785		0.30031
								0.39215		3.4698
								0.11476		-0.059553
								-0.22703		1.2643
								2.5359		0.90022
								3.3		29.948
								1.5062		0.10666
								32.257		8.4591
								2.7399		2.8852
								-0.33528		0.013692
								5.3734		0.72349
								9.4688		1.2279
								0.73979		1.038
								-0.28962		0.75509
								39.879		5.703
								11.577		6.8292
								2.0324		4.0134
								1.3767		-0.0087761
								0.0016595		-0.09367
								4.5802		14.744
								33.031		12.958
								-0.90168		0.2242
								0.50359		-1.5445
								102.68		31.077
								0.82172		-0.36674
								16.342		22.818
								-0.33946		-0.22398
								41.524		6.8039
								120.9		25.031
								0.020891		0.03859
								-0.032711		0.40365
								0.33359		10.018
								46.571		10.222
								18.473		2.9572
								29.683		18.105
								3.2073		6.3377
								1.5337		0.68665
								0.22688		-0.7614
								24.026		0.271
								2.7659		-0.10915
								0.019695		-1.0772
								-0.12515		-0.66415
								-1.0158		-0.71984
								14.389		10.863
								-0.010389		0.011189
								0.55994		0.016333
								4.2376		6.3927
								82.367		17.936
								23.241		0.17818
								-0.098531		-0.88476
								-0.35252		0.068067
								-0.19388		-1.1084
								13.021		-0.46564
								2.8638		0.012723
								0.098186		3.7753
								21.864		-0.30947
								0.76435		-0.17668
								-0.014173		-1.6694
								0.11169		0.47936
								0.002098		-0.55598
								18.918		-0.061694
								0.18253		-0.13086
								-0.66598		-0.0080761
								1.8111		0.18488
								-2.5743		0.057571
								1.4059		2.428
								0.31113		6.9546
								1.9512		0.010002
								1.0899		3.3028
								1.3885		2.6054
								0.012843		0.77996
								33.976		0.93453
								8.0771		14.781
								-0.16064		-0.49437
								10.409		-0.67507
								0.23672		7.368
								-0.62223		20.349
								4.7127		-0.2587
								1.8212		0.021384
								-0.053958		-0.083421
								-0.086678		-0.21304
								0.061184		2.5017
								0.12464		-0.0076472
								0.77981		3.9459
								0.91924		0.76191
								0.47667		0.061696
								0.25479		-0.0032272
								1.064		-0.05264
								0.0062359		-1.1049
								-0.55447		-0.40375
								0.014714		0.023493
								-0.96966		-0.13589
								5.944		-0.0046858
								-0.092415		-0.020504
								33.278		7.4484
								-0.092415		-0.020504
								-0.092415		-0.020504
								0.70329		16.02
								0.081343		1.7217
								7.0259		-0.58526
								-0.91435		-0.5607
								5.7607		0.00010495
								17.642		9.1207
								-0.35517		-0.0611
								6.3124		1.7926
								4.197		12.81
								-0.0022212		2.9221
								4.8277		12.437
								-0.32531		-0.30651
								-0.030186		3.4368
								0.28162		-0.0016483
								0.34589		-0.022039
								4.0571		-0.11793
								1.3077		13.981
								1.4702		84.9
								-0.00058874		0.49143
								27.597		21.179
								-0.00013809		1.2518
								2.3331		29.435
								8.4507		5.6499
								25.052		3.8282
								11.265		7.4717
								-0.83587		2.4183
								0.65268		0.0002121
								10.516		5.297
								49.201		1.3468
								18.479		-0.47443
								29.191		23.035
								-1.8877		-0.69092
								1.7576		4.5401
								2.4676		0.24559
								-0.66699		11.726
								-0.82952		135.09
								12.494		52.969
								-0.0091227		4.4224
								11.057		41.253
								0.48568		11.666
								3.7575		18.088
								0.16612		33.373
								0.11909		32.591
								0.46209		23.519
								-0.39518		6.1031
								-0.02967		8.8707
								5.7299		32.706
								-0.089666		10.32
								26.13		140.11
								116.05		23.289
								26.35		160.39
								0.025179		4.8076
								5.3361		68.898
								22.252		1.858
								55.87		-1.0364
								10.767		1.1013
								18.024		71.195
								7.5016		0.12553
								12.334		50.842
								19.225		1.4045
								17.307		1.0594
								0.010709		-1.3805
								-0.066319		51.829
								5.4706		132.07
								-3.09		0.0046165
								0.90333		-1.3695
								-0.032869		-0.23989
								-0.26977		-0.16267
								3.739		1.0015
								24.096		1.1624
								1.2838		2.1381
								5.3462		6.3632
								-13.015		-1.1666
								3.0302		-0.1036
								-0.73163		-0.13426
								-0.79565		-0.48733
								2.1402		0.92129
								-1.4947		2.121
								-0.80382		-0.35821
								-11.468		-1.8047
								-2.7866		-0.55768
								-0.6762		1.478
								2.388		-0.0003032
								1.6412		-0.044699
								1.7271		5.742
								0.50818		0.62299
								93.18		84.057
								-19.313		-2.1159
								20.045		34.439
								-0.15744		0.010311
								0.098121		-0.50647
								-3.7426		-0.92897
								51.09		35.196
								0.055514		-0.42466
								-0.03671		0.33716
								0.050877		-1.3197
								0.015229		2.1279
								0.096481		-0.068847
								0.63366		-0.13059
								-0.22522		-2.3541
								-0.32621		8.6662
								-3.2746		1.1714
								5.0682		-1.1246
								0.74203		14.5
								0.45511		0.16707
								-0.24663		2.0952
								0.21337		-0.02645
								2040.7		1385.1
								-0.88715		0.5887
								6.075		0.040268
								1.0287		0.50698
								17.341		21.293
								-0.59928		0.31128
								-0.049872		2.791
								-4.7371		-1.1645
								-0.71369		0.059355
								0.31273		-0.032393
								-0.82221		-1.2347
								0.0032218		2.4817
								-1.0189		27.007
								-0.98433		1.3573
								-0.14907		0.94906
								-2.983		3.1075
								0.11252		-0.68145
								-4.8145		-2.0824
								4.0377		-0.003204
								0.10604		-1.313
								153.79		30.202
								0.85894		0.0036352
								6.3296		5.3848
								-0.07028		0.14476
								-4.5696		-4.0185
								-0.015029		-1.4485
								0.19136		-0.85864
								-1.871		0.51538
								4.7157		-0.47344
								83.196		27.688
								17.665		3.6055
								-1.2813		-0.48637
								6.4837		-0.87539
								-2.3504		-0.048266
								18.743		83.68
								-0.0011444		18.907
								0.3409		10.671
								0.4328		0.19834
								0.0039863		-0.034608
								-1.1587		0.094342
								0.30834		1.6696
								-0.06379		0.02782
								-5.3354		8.8291
								-1.3283		0.1115
								-1.3127		2.5364
								-0.47578		-0.15282
								-1.3342		4.0835
								-2.7258		-2.8065
								8.2258		6.6733
								-0.14646		-0.90815
								1.8735		1.0206
								0.30141		2.2307
								1.0017		19.834
								-0.63092		4.0352
								6.5567		1.2333
								0.9341		-1.0885
								-0.028665		-0.013689
								-0.00042392		7.1294
								0.57809		10.468
								-0.025652		-0.091621
								-1.7387		1.1646
								-0.47725		-1.4914
								0.31742		2.7642
								-1.5098		2.0931
								-1.1092		0.028905
								-9.23e-05		1.2991
								-2.9993		0.71928
								0.18972		11.495
								0.61131		9.9703
								-0.75806		2.5298
								1.7603		0.075223
								0.046738		-0.043736
								0.50216		-0.0026113
								-2.5841		0.21932
								-1.5259		-0.11623
								-0.029564		0.40203
								-6.4188		-1.8842
								2.3593		18.448
								4.1471		10.899
								-1.6368		-0.11318
								22.989		20.751
								-0.24477		0.093755
								-2.1114		3.0229
								1.3497		0.37601
								0.095703		-0.28412
								0.070499		8.8419
								0.87133		1.2475
								-0.2054		-1.3413
								-0.28008		17.293
								0.69509		1.5324
								0.15917		-0.052857
								-0.061299		2.5544
								-3.3703		0.010514
								-1.626		4.0767
								-3.1501		-2.3681
								0.026872		-1.2419
								0.073305		-0.19201
								-1.9748		1.3282
								8.1963		0.76921
								-0.13768		0.13315
								23.428		21.226
								-0.36821		0.21437
								-0.30867		-0.85985
								-0.45592		3.9931
								0.075038		8.4827
								0.075038		8.4827
								-0.32089		-1.1845
								0.050468		-0.44479
								-4.4248		0.21668
								-0.76936		-0.98076
								-0.99964		1.1375
								-0.25271		0.57584
								13.387		2.7498
								-0.75639		-0.0094
								-0.38785		5.146
								-0.11657		0.40595
								-0.85613		-0.0090106
								0.48091		-0.14194
								-0.089176		1.8593
								-0.77948		0.62752
								0.014406		7.8292
								13.404		0.21834
								-0.031385		6.0967
								0.65168		15.23
								-2.1242		-0.0030146
								0.0034243		-0.0058641
								0.39754		4.8201
								4.6417		15.842
								7.4813		1.9832
								-0.37338		2.688
								-0.025428		0.0193
								-1.8382		0.023747
								2.0892		16.256
								-0.44408		9.712
								-0.067228		0.069529
								5.8581		2.537
								-0.53564		5.96
								-0.79575		0.056114
								16.674		23.349
								-1.1879		1.0017
								2.192		2.1308
								-0.69484		0.67736
								-0.05085		0.12115
								1.4821		4.7363
								0.54236		-0.043127
								0.43018		-0.55605
								2.5035		-0.0020279
								-0.14565		-0.23231
								-0.50981		1.3157
								-0.070713		-0.056691
								-1.2761		3.8959
								-0.021333		-0.42276
								0.064627		0.00020521
								0.72339		2.0869
								0.33054		1.5767
								0.90361		0.38289
								-0.15107		1.3699
								12.227		2.4642
								-0.16593		1.9916
								-0.32979		-0.77918
								-0.37068		0.68273
								-0.37068		0.68273
								-0.20235		2.15e-05
								-2.2767		0.36341
								-1.1736		8.492
								-1.6583		-0.088498
								-0.80521		-1.3218
								-0.037363		2.0076
								-0.20235		2.15e-05
								2.0162		-0.44546
								-0.091491		1.6192
								-0.6932		-0.2181
								-0.85092		0.49004
								1.1803		0.36722
								-1.0915		-0.11855
								-0.087664		1.4879
								2.4758		4.4631
								14.715		0.66835
								-0.4029		0.85444
								2.7679		1.9828
								-1.0604		0.00017143
								-1.8257		0.14589
								0.0057776		-1.074
								-0.51529		23.043
								0.087818		71.317
								0.0031775		0.014125
								-0.29732		-0.77271
								-0.46828		0.24749
								-0.91103		-0.21922
								0.32559		0.19296
								0.45634		0.00060015
								-0.5934		-0.13205
								-1.1341		-0.17196
								16.84		7.6789
								-0.0013537		-1.0171
								-0.42422		0.1445
								0.0056114		17.753
								8.6315		0.55717
								1.3967		3.4566
								-0.0035221		0.0025974
								1.2509		2.8494
								0.11041		1.4733
								-0.28346		1.865
								-0.040416		5.54
								1.0225		2.7356
								0.0025199		1.4375
								-0.61066		0.055715
								-0.12099		5.8682
								-0.19376		0.056761
								-0.70363		0.10154
								-0.63696		0.18167
								70.241		85.15
								-0.34814		-0.090598
								-1.153		-0.0056252
								0.011055		0.37051
								0.26142		1.2338
								0.013243		-0.80482
								55.962		67.47
								-0.12275		3.7349
								-1.6506		-0.51418
								-1.6643		-0.018576
								-0.11243		-0.090908
								-0.044091		0.27653
								-1.2733		0.00016003
								-0.29378		0.46125
								-0.39757		-1.5991
								-0.093354		0.017174
								1.3802		-0.18985
								-0.19083		2.2962
								9.7438		2.4327
								0.035286		0.9867
								-0.036044		-0.061552
								7.7916		12.319
								-0.031501		11.063
								2.4051		2.6457
								-1.3394		-0.017988
								-1.0317		7.3383
								-0.00279		0.64371
								-0.0044116		0.11343
								0.017776		1.1666
								-1.1506		0.0074606
								-0.016676		-0.55229
								-2.1113		0.0022267
								1.4414		1.3212
								-0.23997		-0.1458
								-0.54067		-0.87826
								3.9244		-0.68508
								0.0076278		-0.0020802
								-0.00097324		0.57191
								-1.7421		0.0055689
								-0.34816		0.92178
								-0.63087		-1.1268
								-2.4507		0.149
								-0.12179		-0.085435
								39.232		0.34441
								-0.69218		-0.20057
								1.3553		-1.1018
								-0.018862		-0.037721
								-0.44372		13.138
								-0.44372		13.138
								1.0469		12.753
								0.078		5.0299
								-1.1344		0.19308
								0.73307		-0.016155
								-0.15287		1.7884
								-0.029704		0.003061
								7.2208		12.431
								-1.1777		-0.87048
								0.085611		1.1201
								5.228		1.5124
								-0.030239		-0.82988
								-1.3839		0.00023916
								-0.13529		1.5824
								-0.2143		0.016636
								-0.49695		-0.059929
								-0.55268		-0.064493
								-1.344		2.0502
								-0.014329		0.3106
								-0.80532		-0.21656
								-0.29238		-0.19969
								-1.7085		0.26977
								-0.025376		-0.33772
								-0.013545		0.90541
								1.0894		0.06725
								-1.342		-0.066654
								-0.080893		-0.30776
								-0.00078819		0.13074
								0.3427		0.15177
								6.2259		0.47057
								-0.35169		0.27714
								-0.44268		-0.003842
								-0.10283		5.9475
								0.028262		1.0183
								-0.51846		0.65116
								0.4108		-0.022372
								16.922		9.9652
								24.784		58.48
								1.1847		0.0010211
								2938.8		1969.9
								11.433		14.353
								6.0834		-0.015251
								-0.61765		5.0827
								0.087325		-0.025333
								0.00070064		0.068757
								0.33275		1.5
								0.80914		-0.17558
								0.25442		-0.18057
								17.767		20.003
								24.85		6.2269
								-0.93293		-0.49037
								13.361		0.57563
								0.0026074		5.7567
								-2.0425		0.74143
								-0.6298		34.983
								8.5724		-0.067671
								-0.36659		8.3586
								57.689		176.42
								0.004251		-0.1461
								1.2007		-0.013142
								0.43888		1.0056
								0.013814		0.98984
								0.45791		-0.055867
								-0.14121		-2.654
								0.00014929		-0.46078
								-0.030955		7.7657
								-0.73887		0.20918
								-0.041801		-0.0048885
								-0.64233		4.5395
								4.6384		4.4351
								-0.69957		1.5441
								-0.70152		20.245
								-0.41414		0.67441
								-0.1088		-0.19132
								-0.27616		-0.12101
								3.2509		4.9772
								-0.29046		-0.024619
								0.050259		3.7875
								2.8111		1.8353
								-0.2816		0.11918
								3.1978		-0.17763
								-4.4107		-0.10338
								1.6106		-0.27392
								-0.54997		8.4168
								-1.442		1.2131
								0.5104		7.0578
								-0.26042		0.63502
								0.0013929		-0.74526
								-0.10375		-1.2063
								1.7522		3.2389
								0.53456		0.19855
								-0.87194		-0.35516
								0.70713		-0.35381
								2.1672		-0.49226
								0.016449		-0.073492
								-0.2063		0.092069
								-0.39866		-0.30549
								-0.013037		-0.077853
								0.021345		-1.3581
								-1.452		0.041666
								-0.17806		-0.14807
								-0.32811		-0.015299
								-0.31638		0.37036
								-0.93642		-0.049325
								-0.022825		1.3988
								-0.51654		-1.7357
								15.014		1.1662
								0.66251		4.8563
								1.0905		0.13448
								70.871		-0.21231
								-1.4969		0.017052
								0.1426		0.56885
								0.67765		0.38232
								0.46424		-0.13099
								0.46544		9.891
								44.817		61.15
								13.712		38.371
								0.28908		53.011
								52.28		54.215
								276.82		119.49
								280.18		109.98
								91.313		3.5797
								85.591		3.0851
								0.27085		155.42
								-0.00041198		28.655
								3.0651		2.8147
								6.6904		109.15
								33.17		23.457
								50.709		450.34
								0.9348		40.806
								66.87		18.785
								37.187		81.712
								82.324		52.773
								486.09		164.99
								9.2675		10.318
								13.387		28.87
								32.846		27.191
								0.16992		62.376
								10.826		262.1
								-0.016348		42.673
								0.30421		21.141
								16.956		30.353
								12.073		12.16
								830.91		1011
								0.10368		2.1875
								7.6031		26.578
								5.7157		25.079
								2.1031		4.3722
								118.92		52.732
								4.8419		0.79028
								-0.25045		19.076
								0.21545		4.5649
								9.7722		22.092
								51.698		18.599
								149.19		15.425
								1.9513		108.32
								-2.6807		12.638
								0.20475		24.776
								919.47		198.53
								0.63342		6.8899
								25.287		16.26
								128.18		26.292
								0.0060647		0.99923
								615.58		113.46
								2.5318		0.90718
								8.446		2.8629
								2.3096		0.24668
								-2.0598		4.4671
								8.0189		0.4204
								7.0171		11.22
								864.99		314.14
								32.819		247.37
								0.20481		-0.43466
								51.147		1.7148
								0.076924		43.454
								40.313		21.842
								3.9159		24.446
								202.7		290.1
								-0.53092		0.97317
								384.07		82.727
								-0.48098		13.658
								101.68		131.3
								-0.74477		18.661
								171.15		20.597
								1.9683		11.305
								-1.0014		3.2312
								60.323		16.969
								0.0023695		11.951
								-0.11132		78.615
								68.667		73.677
								1.0592		3.1767
								6.279		1.0161
								0.16599		-0.012192
								185.38		42.21
								-0.0036295		13.532
								2.7616		4.9653
								182.38		35.945
								-0.088762		30.345
								0.39363		28.922
								0.94689		29.62
								-0.48706		5.1315
								2.0124		11.889
								-3.2419		2.1786
								6.7499		1.0477
								21.213		41.865
								-0.46053		11.718
								0.022908		3.1151
								3.2161		4.1356
								2.1928		2.36
								0.34703		1.7555
								2.2651		25.069
								4.7267		8.6976
								-0.60994		5.9958
								4.2594		3.9473
								17.093		23.886
								0.012345		5.7852
								-0.29738		13.958
								0.61582		22.539
								-0.0022402		38.082
								0.17758		2.0676
								0.14453		0.0093669
								-4.254		13.854
								38.047		9.1765
								0.20625		-0.025472
								9.846		31.213
								7.8174		2.2626
								3.5001		34.54
								-0.18747		0.4224
								11.175		167.06
								11.175		167.06
								-0.056323		0.24368
								5.808		0.48422
								-0.008303		6.9373
								12.871		0.97082
								2.3468		2.4466
								6.4479		0.13614
								26.156		16.264
								108.09		0.36177
								17.389		1.1509
								18.485		5.9758
								-0.011716		10.344
								-0.58221		0.62885
								2.3234		1.7462
								0.042412		11.525
								-0.50729		-0.43817
								2.3247		8.0398
								3.5145		5.0647
								1.9189		-0.88805
								2.0968		0.047032
								0.12928		0.00045812
								5.8314		0.36489
								65.819		11.056
								-0.057548		1.2944
								7.6135		3.6661
								-0.78365		0.0040598
								0.28044		3.2457
								1.3372		8.1888
								2.5644		4.4868
								-0.78038		8.2035
								-0.11566		-0.03649
								42.437		23.305
								0.049393		1.634
								0.32743		8.7575
								0.0066725		0.012416
								2.7522		11.521
								-0.51231		11.915
								0.75958		9.3624
								49.534		39.049
								4.1722		0.52001
								0.060865		-0.69668
								0.054314		0.63832
								13.369		13.501
								11.044		1.5688
								9.1256		0.011878
								0.63034		2.1238
								0.013242		3.0929
								0.70224		0.63155
								14.792		3.1912
								0.77116		-0.13646
								4.1791		2.5146
								0.10977		-0.2676
								0.52255		0.053289
								48.963		53.699
								1.8428		-0.13813
								-0.089025		2.6701
								2.7386		196.52
								10.923		331.09
								0.0087099		9.7918
								1.2789		0.26165
								1.1916		43.821
								1.0087		39.446
								321.68		69.084
								-0.025928		0.45739
								-0.15724		0.63204
								0.054583		0.39786
								4.0117		2.0045
								10.232		40.639
								105.65		167.09
								6.2903		-0.009519
								2.2235		0.16952
								39.635		419.23
								47.009		15.838
								0.045208		0.23132
								18.67		0.43329
								0.2155		1.9703
								-0.70852		4.2147
								0.51083		20.462
								-0.059297		20.628
								-0.08594		2.9592
								0.37908		2.1366
								0.46884		27.985
								6.5412		55.157
								0.12995		9.8273
								-0.33156		2.4711
								81.908		158.74
								15.195		4.4839
								1.6191		1.9628
								0.54259		0.010969
								-0.010029		1.8447
								-0.84221		8.7928
								100.37		41.921
								15.735		118.84
								6.6504		32.558
								-0.092344		3.1593
								2.3878		0.20418
								2.074		21.468
								-0.0034647		2.7739
								-0.17857		-1.1509
								7.6024		1.1718
								34.373		15.178
								-0.053607		0.0042321
								0.21409		0.33448
								0.78705		2.1324
								1.5159		3.4316
								3.6575		4.0579
								-0.83104		8.0795
								-1.1142		3.0525
								9.9097		5.0607
								-0.25535		0.23669
								60.782		0.85536
								-0.20274		-0.00039396
								9.5553		69.692
								0.028608		-0.04967
								-0.051721		5.4678
								10.445		0.77213
								0.0024304		-0.19737
								7.8708		2.782
								4.5782		-0.33071
								0.18614		0.055309
								13.932		0.98356
								9.8128		3.6227
								-0.16227		0.5134
								0.39017		-0.099965
								0.027359		1.9571
								9.4901		0.47358
								0.015831		26.249
								12.051		212.55
								0.95419		1.5589
								13.223		6.9313
								-0.73411		5.6133
								-0.11173		4.6754
								13.011		23.681
								1.5213		-0.63538
								0.69796		23.526
								98.825		134.8
								-0.46109		0.43503
								4.3819		3.6012
								78.634		53.09
								78.634		53.09
								0.87809		-0.087882
								0.010585		4.8296
								1.1154		72.693
								2.5551		6.0358
								-0.82624		0.7831
								-0.72753		0.15086
								-0.059319		0.10799
								1.7526		0.53512
								-0.31116		5.6353
								-0.58458		-0.64748
								0.12909		2925.9

## Sheet: Sheet3
terms	OMIC gene counts		tumor specific responding	61		normal specific responding	76		no responding	39		consistent responding	10		divergent responding	55
tumor specific responding	61		tumor specific responding	49		normal specific responding	46		no responding	38		consistent responding	7		divergent responding	52
tumor specific responding	24		tumor specific responding	35		normal specific responding	39		no responding	33		consistent responding	5		divergent responding	52
tumor specific responding	3		tumor specific responding	35		normal specific responding	28		no responding	33		consistent responding	5		divergent responding	44
tumor specific responding	4		tumor specific responding	33		normal specific responding	28		no responding	30		consistent responding	4		divergent responding	38
tumor specific responding	22		tumor specific responding	33		normal specific responding	28		no responding	27		consistent responding	4		divergent responding	38
tumor specific responding	3		tumor specific responding	32		normal specific responding	25		no responding	26		consistent responding	4		divergent responding	37
tumor specific responding	19		tumor specific responding	29		normal specific responding	24		no responding	24		consistent responding	3		divergent responding	35
tumor specific responding	6		tumor specific responding	27		normal specific responding	23		no responding	24		consistent responding	3		divergent responding	34
tumor specific responding	18		tumor specific responding	27		normal specific responding	22		no responding	23		consistent responding	3		divergent responding	31
tumor specific responding	16		tumor specific responding	27		normal specific responding	22		no responding	21		consistent responding	2		divergent responding	31
tumor specific responding	5		tumor specific responding	26		normal specific responding	22		no responding	20		consistent responding	2		divergent responding	30
tumor specific responding	26		tumor specific responding	26		normal specific responding	19		no responding	20		consistent responding	2		divergent responding	28
tumor specific responding	19		tumor specific responding	24		normal specific responding	18		no responding	18		consistent responding	2		divergent responding	27
tumor specific responding	33		tumor specific responding	23		normal specific responding	15		no responding	17		consistent responding	2		divergent responding	26
tumor specific responding	19		tumor specific responding	23		normal specific responding	15		no responding	17		consistent responding	2		divergent responding	25
tumor specific responding	27		tumor specific responding	23		normal specific responding	14		no responding	16		consistent responding	2		divergent responding	24
tumor specific responding	7		tumor specific responding	23		normal specific responding	12		no responding	16		consistent responding	1		divergent responding	23
tumor specific responding	6		tumor specific responding	23		normal specific responding	12		no responding	15		consistent responding	1		divergent responding	22
tumor specific responding	27		tumor specific responding	22		normal specific responding	12		no responding	15		consistent responding	0		divergent responding	22
tumor specific responding	27		tumor specific responding	21		normal specific responding	12		no responding	15		consistent responding	0		divergent responding	21
tumor specific responding	17		tumor specific responding	21		normal specific responding	12		no responding	15		consistent responding	0		divergent responding	21
tumor specific responding	23		tumor specific responding	21		normal specific responding	11		no responding	14		consistent responding	0		divergent responding	21
tumor specific responding	23		tumor specific responding	19		normal specific responding	11		no responding	14		consistent responding	0		divergent responding	20
tumor specific responding	12		tumor specific responding	19		normal specific responding	10		no responding	13		consistent responding	0		divergent responding	20
tumor specific responding	10		tumor specific responding	19		normal specific responding	10		no responding	13		consistent responding	0		divergent responding	19
tumor specific responding	14		tumor specific responding	18		normal specific responding	10		no responding	13					divergent responding	19
tumor specific responding	8		tumor specific responding	18		normal specific responding	10		no responding	12					divergent responding	19
tumor specific responding	2		tumor specific responding	18		normal specific responding	9		no responding	12					divergent responding	18
tumor specific responding	3		tumor specific responding	18		normal specific responding	9		no responding	12					divergent responding	17
tumor specific responding	15		tumor specific responding	17		normal specific responding	9		no responding	11					divergent responding	17
tumor specific responding	1		tumor specific responding	16		normal specific responding	9		no responding	11					divergent responding	16
tumor specific responding	16		tumor specific responding	16		normal specific responding	9		no responding	11					divergent responding	16
tumor specific responding	16		tumor specific responding	16		normal specific responding	9		no responding	11					divergent responding	15
tumor specific responding	3		tumor specific responding	16		normal specific responding	9		no responding	11					divergent responding	15
tumor specific responding	26		tumor specific responding	16		normal specific responding	9		no responding	10					divergent responding	15
tumor specific responding	16		tumor specific responding	15		normal specific responding	8		no responding	10					divergent responding	15
tumor specific responding	7		tumor specific responding	15		normal specific responding	8		no responding	10					divergent responding	15
tumor specific responding	1		tumor specific responding	14		normal specific responding	8		no responding	10					divergent responding	14
tumor specific responding	4		tumor specific responding	14		normal specific responding	8		no responding	10					divergent responding	14
tumor specific responding	4		tumor specific responding	14		normal specific responding	8		no responding	10					divergent responding	14
tumor specific responding	18		tumor specific responding	14		normal specific responding	8		no responding	9					divergent responding	14
tumor specific responding	5		tumor specific responding	14		normal specific responding	7		no responding	9					divergent responding	13
tumor specific responding	5		tumor specific responding	13		normal specific responding	7		no responding	9					divergent responding	12
tumor specific responding	11		tumor specific responding	13		normal specific responding	7		no responding	9					divergent responding	12
tumor specific responding	4		tumor specific responding	12		normal specific responding	7		no responding	9					divergent responding	12
tumor specific responding	1		tumor specific responding	12		normal specific responding	7		no responding	9					divergent responding	12
tumor specific responding	4		tumor specific responding	12		normal specific responding	7		no responding	9					divergent responding	11
tumor specific responding	9		tumor specific responding	11		normal specific responding	7		no responding	9					divergent responding	11
tumor specific responding	10		tumor specific responding	11		normal specific responding	6		no responding	9					divergent responding	11
tumor specific responding	18		tumor specific responding	11		normal specific responding	6		no responding	9					divergent responding	11
tumor specific responding	3		tumor specific responding	11		normal specific responding	6		no responding	9					divergent responding	11
tumor specific responding	2		tumor specific responding	11		normal specific responding	6		no responding	9					divergent responding	10
tumor specific responding	3		tumor specific responding	10		normal specific responding	6		no responding	9					divergent responding	10
tumor specific responding	4		tumor specific responding	10		normal specific responding	6		no responding	9					divergent responding	10
tumor specific responding	1		tumor specific responding	10		normal specific responding	6		no responding	8					divergent responding	10
tumor specific responding	1		tumor specific responding	10		normal specific responding	6		no responding	8					divergent responding	10
tumor specific responding	5		tumor specific responding	10		normal specific responding	6		no responding	8					divergent responding	10
tumor specific responding	4		tumor specific responding	10		normal specific responding	5		no responding	8					divergent responding	9
tumor specific responding	8		tumor specific responding	10		normal specific responding	5		no responding	8					divergent responding	9
tumor specific responding	4		tumor specific responding	9		normal specific responding	5		no responding	8					divergent responding	9
tumor specific responding	2		tumor specific responding	9		normal specific responding	5		no responding	8					divergent responding	9
tumor specific responding	4		tumor specific responding	9		normal specific responding	5		no responding	7					divergent responding	9
tumor specific responding	4		tumor specific responding	9		normal specific responding	5		no responding	7					divergent responding	9
tumor specific responding	8		tumor specific responding	9		normal specific responding	5		no responding	7					divergent responding	9
tumor specific responding	3		tumor specific responding	9		normal specific responding	5		no responding	7					divergent responding	9
tumor specific responding	14		tumor specific responding	9		normal specific responding	5		no responding	7					divergent responding	8
tumor specific responding	4		tumor specific responding	9		normal specific responding	5		no responding	7					divergent responding	8
tumor specific responding	0		tumor specific responding	9		normal specific responding	5		no responding	7					divergent responding	8
tumor specific responding	3		tumor specific responding	8		normal specific responding	4		no responding	7					divergent responding	8
tumor specific responding	14		tumor specific responding	8		normal specific responding	4		no responding	7					divergent responding	8
tumor specific responding	3		tumor specific responding	8		normal specific responding	4		no responding	7					divergent responding	8
tumor specific responding	8		tumor specific responding	8		normal specific responding	4		no responding	7					divergent responding	8
tumor specific responding	8		tumor specific responding	8		normal specific responding	4		no responding	7					divergent responding	8
tumor specific responding	3		tumor specific responding	8		normal specific responding	4		no responding	6					divergent responding	8
tumor specific responding	6		tumor specific responding	8		normal specific responding	4		no responding	6					divergent responding	8
tumor specific responding	0		tumor specific responding	8		normal specific responding	4		no responding	6					divergent responding	8
tumor specific responding	2		tumor specific responding	8		normal specific responding	4		no responding	6					divergent responding	7
tumor specific responding	2		tumor specific responding	8		normal specific responding	4		no responding	6					divergent responding	7
tumor specific responding	1		tumor specific responding	8		normal specific responding	4		no responding	6					divergent responding	7
tumor specific responding	7		tumor specific responding	8		normal specific responding	4		no responding	6					divergent responding	7
tumor specific responding	6		tumor specific responding	8		normal specific responding	4		no responding	6					divergent responding	7
tumor specific responding	5		tumor specific responding	8		normal specific responding	4		no responding	6					divergent responding	7
tumor specific responding	6		tumor specific responding	8		normal specific responding	3		no responding	6					divergent responding	7
tumor specific responding	0		tumor specific responding	8		normal specific responding	3		no responding	6					divergent responding	7
tumor specific responding	8		tumor specific responding	8		normal specific responding	3		no responding	6					divergent responding	7
tumor specific responding	3		tumor specific responding	8		normal specific responding	3		no responding	6					divergent responding	7
tumor specific responding	11		tumor specific responding	8		normal specific responding	3		no responding	5					divergent responding	6
tumor specific responding	3		tumor specific responding	8		normal specific responding	3		no responding	5					divergent responding	6
tumor specific responding	7		tumor specific responding	7		normal specific responding	3		no responding	5					divergent responding	6
tumor specific responding	6		tumor specific responding	7		normal specific responding	3		no responding	5					divergent responding	6
tumor specific responding	2		tumor specific responding	7		normal specific responding	3		no responding	5					divergent responding	6
tumor specific responding	2		tumor specific responding	7		normal specific responding	3		no responding	5					divergent responding	6
tumor specific responding	4		tumor specific responding	7		normal specific responding	3		no responding	5					divergent responding	6
tumor specific responding	2		tumor specific responding	7		normal specific responding	3		no responding	5					divergent responding	6
tumor specific responding	7		tumor specific responding	7		normal specific responding	3		no responding	5					divergent responding	6
tumor specific responding	6		tumor specific responding	7		normal specific responding	3		no responding	5					divergent responding	6
tumor specific responding	7		tumor specific responding	7		normal specific responding	3		no responding	5					divergent responding	6
tumor specific responding	14		tumor specific responding	7		normal specific responding	3		no responding	5					divergent responding	5
tumor specific responding	3		tumor specific responding	7		normal specific responding	3		no responding	5					divergent responding	5
tumor specific responding	2		tumor specific responding	7		normal specific responding	3		no responding	5					divergent responding	5
tumor specific responding	2		tumor specific responding	7		normal specific responding	3		no responding	5					divergent responding	5
tumor specific responding	3		tumor specific responding	7		normal specific responding	3		no responding	5					divergent responding	5
tumor specific responding	5		tumor specific responding	7		normal specific responding	3		no responding	5					divergent responding	5
tumor specific responding	9		tumor specific responding	7		normal specific responding	2		no responding	5					divergent responding	5
tumor specific responding	1		tumor specific responding	7		normal specific responding	2		no responding	5					divergent responding	5
tumor specific responding	0		tumor specific responding	6		normal specific responding	2		no responding	5					divergent responding	5
tumor specific responding	5		tumor specific responding	6		normal specific responding	2		no responding	5					divergent responding	5
tumor specific responding	1		tumor specific responding	6		normal specific responding	2		no responding	5					divergent responding	5
tumor specific responding	0		tumor specific responding	6		normal specific responding	2		no responding	4					divergent responding	5
tumor specific responding	1		tumor specific responding	6		normal specific responding	2		no responding	4					divergent responding	5
tumor specific responding	6		tumor specific responding	6		normal specific responding	2		no responding	4					divergent responding	5
tumor specific responding	5		tumor specific responding	6		normal specific responding	2		no responding	4					divergent responding	5
tumor specific responding	0		tumor specific responding	6		normal specific responding	2		no responding	4					divergent responding	5
tumor specific responding	0		tumor specific responding	6		normal specific responding	2		no responding	4					divergent responding	4
tumor specific responding	4		tumor specific responding	6		normal specific responding	2		no responding	4					divergent responding	4
tumor specific responding	0		tumor specific responding	6		normal specific responding	2		no responding	4					divergent responding	4
tumor specific responding	6		tumor specific responding	6		normal specific responding	2		no responding	4					divergent responding	4
tumor specific responding	1		tumor specific responding	6		normal specific responding	2		no responding	4					divergent responding	4
tumor specific responding	2		tumor specific responding	6		normal specific responding	2		no responding	4					divergent responding	4
tumor specific responding	3		tumor specific responding	6		normal specific responding	2		no responding	4					divergent responding	4
tumor specific responding	2		tumor specific responding	6		normal specific responding	2		no responding	4					divergent responding	4
tumor specific responding	2		tumor specific responding	5		normal specific responding	2		no responding	4					divergent responding	4
tumor specific responding	0		tumor specific responding	5		normal specific responding	2		no responding	4					divergent responding	4
tumor specific responding	7		tumor specific responding	5		normal specific responding	2		no responding	4					divergent responding	4
tumor specific responding	10		tumor specific responding	5		normal specific responding	2		no responding	4					divergent responding	4
tumor specific responding	6		tumor specific responding	5		normal specific responding	2		no responding	4					divergent responding	4
tumor specific responding	2		tumor specific responding	5		normal specific responding	2		no responding	4					divergent responding	4
tumor specific responding	7		tumor specific responding	5		normal specific responding	2		no responding	4					divergent responding	4
tumor specific responding	0		tumor specific responding	5		normal specific responding	2		no responding	4					divergent responding	4
tumor specific responding	2		tumor specific responding	5		normal specific responding	2		no responding	4					divergent responding	3
tumor specific responding	0		tumor specific responding	5		normal specific responding	2		no responding	4					divergent responding	3
tumor specific responding	0		tumor specific responding	5		normal specific responding	2		no responding	4					divergent responding	3
tumor specific responding	2		tumor specific responding	5		normal specific responding	1		no responding	4					divergent responding	3
tumor specific responding	0		tumor specific responding	5		normal specific responding	1		no responding	4					divergent responding	3
tumor specific responding	3		tumor specific responding	5		normal specific responding	1		no responding	4					divergent responding	3
tumor specific responding	10		tumor specific responding	5		normal specific responding	1		no responding	4					divergent responding	3
tumor specific responding	3		tumor specific responding	5		normal specific responding	1		no responding	4					divergent responding	3
tumor specific responding	2		tumor specific responding	5		normal specific responding	1		no responding	3					divergent responding	3
tumor specific responding	0		tumor specific responding	5		normal specific responding	1		no responding	3					divergent responding	3
tumor specific responding	1		tumor specific responding	5		normal specific responding	1		no responding	3					divergent responding	3
tumor specific responding	4		tumor specific responding	5		normal specific responding	1		no responding	3					divergent responding	3
tumor specific responding	4		tumor specific responding	5		normal specific responding	1		no responding	3					divergent responding	3
tumor specific responding	5		tumor specific responding	5		normal specific responding	1		no responding	3					divergent responding	3
tumor specific responding	3		tumor specific responding	5		normal specific responding	1		no responding	3					divergent responding	3
tumor specific responding	5		tumor specific responding	5		normal specific responding	1		no responding	3					divergent responding	3
tumor specific responding	6		tumor specific responding	4		normal specific responding	1		no responding	3					divergent responding	3
tumor specific responding	0		tumor specific responding	4		normal specific responding	1		no responding	3					divergent responding	3
tumor specific responding	2		tumor specific responding	4		normal specific responding	1		no responding	3					divergent responding	3
tumor specific responding	0		tumor specific responding	4		normal specific responding	1		no responding	3					divergent responding	3
tumor specific responding	0		tumor specific responding	4		normal specific responding	1		no responding	3					divergent responding	3
tumor specific responding	3		tumor specific responding	4		normal specific responding	1		no responding	3					divergent responding	3
tumor specific responding	3		tumor specific responding	4		normal specific responding	1		no responding	3					divergent responding	2
tumor specific responding	0		tumor specific responding	4		normal specific responding	1		no responding	3					divergent responding	2
tumor specific responding	0		tumor specific responding	4		normal specific responding	1		no responding	3					divergent responding	2
tumor specific responding	7		tumor specific responding	4		normal specific responding	1		no responding	3					divergent responding	2
tumor specific responding	2		tumor specific responding	4		normal specific responding	1		no responding	3					divergent responding	2
tumor specific responding	2		tumor specific responding	4		normal specific responding	1		no responding	3					divergent responding	2
tumor specific responding	1		tumor specific responding	4		normal specific responding	1		no responding	3					divergent responding	2
tumor specific responding	7		tumor specific responding	4		normal specific responding	1		no responding	3					divergent responding	2
tumor specific responding	0		tumor specific responding	4		normal specific responding	1		no responding	3					divergent responding	2
tumor specific responding	2		tumor specific responding	4		normal specific responding	1		no responding	3					divergent responding	2
tumor specific responding	0		tumor specific responding	4		normal specific responding	1		no responding	3					divergent responding	2
tumor specific responding	3		tumor specific responding	4		normal specific responding	1		no responding	3					divergent responding	2
tumor specific responding	2		tumor specific responding	4		normal specific responding	1		no responding	3					divergent responding	2
tumor specific responding	3		tumor specific responding	4		normal specific responding	1		no responding	3					divergent responding	2
tumor specific responding	1		tumor specific responding	4		normal specific responding	1		no responding	3					divergent responding	2
tumor specific responding	0		tumor specific responding	4		normal specific responding	1		no responding	3					divergent responding	2
tumor specific responding	0		tumor specific responding	4		normal specific responding	1		no responding	3					divergent responding	2
tumor specific responding	0		tumor specific responding	4		normal specific responding	1		no responding	3					divergent responding	2
tumor specific responding	1		tumor specific responding	4		normal specific responding	1		no responding	3					divergent responding	2
tumor specific responding	0		tumor specific responding	4		normal specific responding	1		no responding	3					divergent responding	2
tumor specific responding	1		tumor specific responding	4		normal specific responding	1		no responding	3					divergent responding	2
tumor specific responding	1		tumor specific responding	4		normal specific responding	0		no responding	3					divergent responding	2
tumor specific responding	2		tumor specific responding	4		normal specific responding	0		no responding	3					divergent responding	2
tumor specific responding	5		tumor specific responding	4		normal specific responding	0		no responding	3					divergent responding	2
tumor specific responding	2		tumor specific responding	3		normal specific responding	0		no responding	3					divergent responding	2
tumor specific responding	0		tumor specific responding	3		normal specific responding	0		no responding	3					divergent responding	2
tumor specific responding	5		tumor specific responding	3		normal specific responding	0		no responding	3					divergent responding	2
tumor specific responding	0		tumor specific responding	3		normal specific responding	0		no responding	3					divergent responding	2
tumor specific responding	0		tumor specific responding	3		normal specific responding	0		no responding	3					divergent responding	2
tumor specific responding	2		tumor specific responding	3		normal specific responding	0		no responding	2					divergent responding	2
tumor specific responding	3		tumor specific responding	3		normal specific responding	0		no responding	2					divergent responding	2
tumor specific responding	2		tumor specific responding	3		normal specific responding	0		no responding	2					divergent responding	1
tumor specific responding	2		tumor specific responding	3		normal specific responding	0		no responding	2					divergent responding	1
tumor specific responding	5		tumor specific responding	3		normal specific responding	0		no responding	2					divergent responding	1
tumor specific responding	0		tumor specific responding	3		normal specific responding	0		no responding	2					divergent responding	1
tumor specific responding	2		tumor specific responding	3		normal specific responding	0		no responding	2					divergent responding	1
tumor specific responding	0		tumor specific responding	3		normal specific responding	0		no responding	2					divergent responding	1
tumor specific responding	1		tumor specific responding	3		normal specific responding	0		no responding	2					divergent responding	1
tumor specific responding	1		tumor specific responding	3		normal specific responding	0		no responding	2					divergent responding	1
tumor specific responding	0		tumor specific responding	3		normal specific responding	0		no responding	2					divergent responding	1
tumor specific responding	0		tumor specific responding	3		normal specific responding	0		no responding	2					divergent responding	1
tumor specific responding	2		tumor specific responding	3		normal specific responding	0		no responding	2					divergent responding	1
tumor specific responding	3		tumor specific responding	3		normal specific responding	0		no responding	2					divergent responding	1
tumor specific responding	0		tumor specific responding	3		normal specific responding	0		no responding	2					divergent responding	1
tumor specific responding	1		tumor specific responding	3		normal specific responding	0		no responding	2					divergent responding	1
tumor specific responding	0		tumor specific responding	3		normal specific responding	0		no responding	2					divergent responding	1
tumor specific responding	0		tumor specific responding	3		normal specific responding	0		no responding	2					divergent responding	1
tumor specific responding	0		tumor specific responding	3		normal specific responding	0		no responding	2					divergent responding	1
tumor specific responding	1		tumor specific responding	3		normal specific responding	0		no responding	2					divergent responding	1
tumor specific responding	0		tumor specific responding	3		normal specific responding	0		no responding	2					divergent responding	1
tumor specific responding	1		tumor specific responding	3		normal specific responding	0		no responding	2					divergent responding	1
tumor specific responding	0		tumor specific responding	3		normal specific responding	0		no responding	2					divergent responding	1
tumor specific responding	4		tumor specific responding	3		normal specific responding	0		no responding	2					divergent responding	1
tumor specific responding	1		tumor specific responding	3		normal specific responding	0		no responding	2					divergent responding	1
tumor specific responding	0		tumor specific responding	3		normal specific responding	0		no responding	2					divergent responding	1
tumor specific responding	2		tumor specific responding	3		normal specific responding	0		no responding	2					divergent responding	1
tumor specific responding	4		tumor specific responding	3		normal specific responding	0		no responding	2					divergent responding	1
tumor specific responding	0		tumor specific responding	3		normal specific responding	0		no responding	2					divergent responding	1
tumor specific responding	0		tumor specific responding	3		normal specific responding	0		no responding	2					divergent responding	0
tumor specific responding	2		tumor specific responding	3		normal specific responding	0		no responding	2					divergent responding	0
tumor specific responding	2		tumor specific responding	3		normal specific responding	0		no responding	2					divergent responding	0
tumor specific responding	1		tumor specific responding	3		normal specific responding	0		no responding	2					divergent responding	0
tumor specific responding	3		tumor specific responding	2					no responding	2					divergent responding	0
tumor specific responding	0		tumor specific responding	2					no responding	2					divergent responding	0
tumor specific responding	0		tumor specific responding	2					no responding	2					divergent responding	0
tumor specific responding	2		tumor specific responding	2					no responding	2					divergent responding	0
tumor specific responding	0		tumor specific responding	2					no responding	2					divergent responding	0
tumor specific responding	0		tumor specific responding	2					no responding	2					divergent responding	0
tumor specific responding	0		tumor specific responding	2					no responding	2					divergent responding	0
tumor specific responding	2		tumor specific responding	2					no responding	2					divergent responding	0
tumor specific responding	1		tumor specific responding	2					no responding	2					divergent responding	0
tumor specific responding	2		tumor specific responding	2					no responding	2					divergent responding	0
tumor specific responding	1		tumor specific responding	2					no responding	2					divergent responding	0
tumor specific responding	1		tumor specific responding	2					no responding	1					divergent responding	0
tumor specific responding	0		tumor specific responding	2					no responding	1					divergent responding	0
tumor specific responding	1		tumor specific responding	2					no responding	1					divergent responding	0
tumor specific responding	1		tumor specific responding	2					no responding	1					divergent responding	0
tumor specific responding	2		tumor specific responding	2					no responding	1					divergent responding	0
tumor specific responding	3		tumor specific responding	2					no responding	1					divergent responding	0
tumor specific responding	4		tumor specific responding	2					no responding	1					divergent responding	0
tumor specific responding	2		tumor specific responding	2					no responding	1					divergent responding	0
tumor specific responding	1		tumor specific responding	2					no responding	1					divergent responding	0
tumor specific responding	0		tumor specific responding	2					no responding	1					divergent responding	0
tumor specific responding	0		tumor specific responding	2					no responding	1					divergent responding	0
tumor specific responding	0		tumor specific responding	2					no responding	1					divergent responding	0
tumor specific responding	1		tumor specific responding	2					no responding	1					divergent responding	0
tumor specific responding	2		tumor specific responding	2					no responding	1					divergent responding	0
tumor specific responding	0		tumor specific responding	2					no responding	1					divergent responding	0
tumor specific responding	0		tumor specific responding	2					no responding	1
tumor specific responding	0		tumor specific responding	2					no responding	1
tumor specific responding	1		tumor specific responding	2					no responding	1
tumor specific responding	1		tumor specific responding	2					no responding	1
tumor specific responding	1		tumor specific responding	2					no responding	1
tumor specific responding	0		tumor specific responding	2					no responding	1
tumor specific responding	2		tumor specific responding	2					no responding	1
tumor specific responding	1		tumor specific responding	2					no responding	1
tumor specific responding	0		tumor specific responding	2					no responding	1
tumor specific responding	0		tumor specific responding	2					no responding	1
tumor specific responding	0		tumor specific responding	2					no responding	1
tumor specific responding	2		tumor specific responding	2					no responding	1
tumor specific responding	23		tumor specific responding	2					no responding	1
tumor specific responding	16		tumor specific responding	2					no responding	1
tumor specific responding	7		tumor specific responding	2					no responding	1
tumor specific responding	18		tumor specific responding	2					no responding	1
tumor specific responding	14		tumor specific responding	2					no responding	1
tumor specific responding	8		tumor specific responding	2					no responding	1
tumor specific responding	3		tumor specific responding	2					no responding	1
tumor specific responding	0		tumor specific responding	2					no responding	1
tumor specific responding	9		tumor specific responding	2					no responding	1
tumor specific responding	10		tumor specific responding	2					no responding	1
tumor specific responding	32		tumor specific responding	2					no responding	1
tumor specific responding	21		tumor specific responding	2					no responding	1
tumor specific responding	13		tumor specific responding	2					no responding	1
tumor specific responding	13		tumor specific responding	2					no responding	1
tumor specific responding	12		tumor specific responding	2					no responding	1
tumor specific responding	12		tumor specific responding	2					no responding	1
tumor specific responding	21		tumor specific responding	1					no responding	1
tumor specific responding	21		tumor specific responding	1					no responding	1
tumor specific responding	0		tumor specific responding	1					no responding	1
tumor specific responding	1		tumor specific responding	1					no responding	1
tumor specific responding	0		tumor specific responding	1					no responding	1
tumor specific responding	6		tumor specific responding	1					no responding	1
tumor specific responding	2		tumor specific responding	1					no responding	1
tumor specific responding	23		tumor specific responding	1					no responding	1
tumor specific responding	1		tumor specific responding	1					no responding	1
tumor specific responding	0		tumor specific responding	1					no responding	1
tumor specific responding	3		tumor specific responding	1					no responding	1
tumor specific responding	8		tumor specific responding	1					no responding	1
tumor specific responding	0		tumor specific responding	1					no responding	1
tumor specific responding	2		tumor specific responding	1					no responding	1
tumor specific responding	1		tumor specific responding	1					no responding	1
tumor specific responding	3		tumor specific responding	1					no responding	1
tumor specific responding	5		tumor specific responding	1					no responding	1
tumor specific responding	2		tumor specific responding	1					no responding	1
tumor specific responding	3		tumor specific responding	1					no responding	1
tumor specific responding	0		tumor specific responding	1					no responding	1
tumor specific responding	0		tumor specific responding	1					no responding	1
tumor specific responding	0		tumor specific responding	1					no responding	1
tumor specific responding	1		tumor specific responding	1					no responding	1
tumor specific responding	0		tumor specific responding	1					no responding	1
tumor specific responding	0		tumor specific responding	1					no responding	1
tumor specific responding	0		tumor specific responding	1					no responding	1
tumor specific responding	0		tumor specific responding	1					no responding	1
tumor specific responding	2		tumor specific responding	1					no responding	1
tumor specific responding	0		tumor specific responding	1					no responding	1
tumor specific responding	1		tumor specific responding	1					no responding	1
tumor specific responding	0		tumor specific responding	1					no responding	1
tumor specific responding	0		tumor specific responding	1					no responding	1
tumor specific responding	1		tumor specific responding	1					no responding	1
tumor specific responding	0		tumor specific responding	1					no responding	1
tumor specific responding	9		tumor specific responding	1					no responding	0
tumor specific responding	8		tumor specific responding	1					no responding	0
tumor specific responding	11		tumor specific responding	1					no responding	0
tumor specific responding	7		tumor specific responding	1					no responding	0
tumor specific responding	8		tumor specific responding	1					no responding	0
tumor specific responding	8		tumor specific responding	1					no responding	0
tumor specific responding	11		tumor specific responding	1					no responding	0
tumor specific responding	3		tumor specific responding	1					no responding	0
tumor specific responding	4		tumor specific responding	1					no responding	0
tumor specific responding	5		tumor specific responding	1					no responding	0
tumor specific responding	3		tumor specific responding	1					no responding	0
tumor specific responding	8		tumor specific responding	1					no responding	0
tumor specific responding	8		tumor specific responding	1					no responding	0
tumor specific responding	9		tumor specific responding	1					no responding	0
tumor specific responding	2		tumor specific responding	1					no responding	0
tumor specific responding	10		tumor specific responding	0					no responding	0
tumor specific responding	1		tumor specific responding	0					no responding	0
tumor specific responding	3		tumor specific responding	0					no responding	0
tumor specific responding	3		tumor specific responding	0					no responding	0
tumor specific responding	9		tumor specific responding	0					no responding	0
tumor specific responding	1		tumor specific responding	0					no responding	0
tumor specific responding	7		tumor specific responding	0					no responding	0
tumor specific responding	8		tumor specific responding	0					no responding	0
tumor specific responding	8		tumor specific responding	0					no responding	0
tumor specific responding	5		tumor specific responding	0					no responding	0
tumor specific responding	6		tumor specific responding	0					no responding	0
tumor specific responding	5		tumor specific responding	0					no responding	0
tumor specific responding	11		tumor specific responding	0					no responding	0
tumor specific responding	4		tumor specific responding	0					no responding	0
tumor specific responding	7		tumor specific responding	0					no responding	0
tumor specific responding	2		tumor specific responding	0					no responding	0
tumor specific responding	5		tumor specific responding	0					no responding	0
tumor specific responding	9		tumor specific responding	0					no responding	0
tumor specific responding	5		tumor specific responding	0					no responding	0
tumor specific responding	9		tumor specific responding	0					no responding	0
tumor specific responding	10		tumor specific responding	0					no responding	0
tumor specific responding	7		tumor specific responding	0					no responding	0
tumor specific responding	5		tumor specific responding	0					no responding	0
tumor specific responding	1		tumor specific responding	0					no responding	0
tumor specific responding	7		tumor specific responding	0					no responding	0
tumor specific responding	6		tumor specific responding	0					no responding	0
tumor specific responding	2		tumor specific responding	0					no responding	0
tumor specific responding	2		tumor specific responding	0					no responding	0
tumor specific responding	5		tumor specific responding	0					no responding	0
tumor specific responding	2		tumor specific responding	0					no responding	0
tumor specific responding	9		tumor specific responding	0					no responding	0
tumor specific responding	6		tumor specific responding	0					no responding	0
tumor specific responding	4		tumor specific responding	0					no responding	0
tumor specific responding	4		tumor specific responding	0					no responding	0
tumor specific responding	6		tumor specific responding	0					no responding	0
tumor specific responding	2		tumor specific responding	0					no responding	0
tumor specific responding	0		tumor specific responding	0					no responding	0
tumor specific responding	7		tumor specific responding	0					no responding	0
tumor specific responding	3		tumor specific responding	0					no responding	0
tumor specific responding	2		tumor specific responding	0					no responding	0
tumor specific responding	4		tumor specific responding	0					no responding	0
tumor specific responding	1		tumor specific responding	0					no responding	0
tumor specific responding	4		tumor specific responding	0					no responding	0
tumor specific responding	5		tumor specific responding	0					no responding	0
tumor specific responding	49		tumor specific responding	0					no responding	0
tumor specific responding	35		tumor specific responding	0					no responding	0
tumor specific responding	35		tumor specific responding	0					no responding	0
tumor specific responding	1		tumor specific responding	0					no responding	0
tumor specific responding	8		tumor specific responding	0					no responding	0
tumor specific responding	33		tumor specific responding	0					no responding	0
tumor specific responding	8		tumor specific responding	0					no responding	0
tumor specific responding	8		tumor specific responding	0					no responding	0
tumor specific responding	8		tumor specific responding	0					no responding	0
tumor specific responding	8		tumor specific responding	0					no responding	0
tumor specific responding	29		tumor specific responding	0					no responding	0
tumor specific responding	3		tumor specific responding	0					no responding	0
tumor specific responding	23		tumor specific responding	0					no responding	0
tumor specific responding	0		tumor specific responding	0					no responding	0
tumor specific responding	0		tumor specific responding	0					no responding	0
tumor specific responding	3		tumor specific responding	0					no responding	0
tumor specific responding	3		tumor specific responding	0					no responding	0
tumor specific responding	1		tumor specific responding	0					no responding	0
tumor specific responding	1		tumor specific responding	0					no responding	0
tumor specific responding	0		tumor specific responding	0					no responding	0
tumor specific responding	0		tumor specific responding	0					no responding	0
tumor specific responding	4		tumor specific responding	0					no responding	0
tumor specific responding	0		tumor specific responding	0					no responding	0
tumor specific responding	0		tumor specific responding	0					no responding	0
tumor specific responding	2		tumor specific responding	0					no responding	0
tumor specific responding	0		tumor specific responding	0					no responding	0
tumor specific responding	4		tumor specific responding	0					no responding	0
tumor specific responding	0		tumor specific responding	0					no responding	0
tumor specific responding	1		tumor specific responding	0					no responding	0
tumor specific responding	0		tumor specific responding	0					no responding	0
tumor specific responding	15		tumor specific responding	0					no responding	0
tumor specific responding	5		tumor specific responding	0					no responding	0
tumor specific responding	5		tumor specific responding	0					no responding	0
tumor specific responding	4		tumor specific responding	0					no responding	0
tumor specific responding	4		tumor specific responding	0					no responding	0
tumor specific responding	4		tumor specific responding	0					no responding	0
tumor specific responding	2		tumor specific responding	0					no responding	0
tumor specific responding	2		tumor specific responding	0					no responding	0
tumor specific responding	1		tumor specific responding	0					no responding	0
tumor specific responding	0		tumor specific responding	0					no responding	0
tumor specific responding	4								no responding	0
normal specific responding	46								no responding	0
normal specific responding	28								no responding	0
normal specific responding	9								no responding	0
normal specific responding	11								no responding	0
normal specific responding	9								no responding	0
normal specific responding	9								no responding	0
normal specific responding	12								no responding	0
normal specific responding	4								no responding	0
normal specific responding	22								no responding	0
normal specific responding	12								no responding	0
normal specific responding	4								no responding	0
normal specific responding	1								no responding	0
normal specific responding	8								no responding	0
normal specific responding	5								no responding	0
normal specific responding	15								no responding	0
normal specific responding	15								no responding	0
normal specific responding	8								no responding	0
normal specific responding	14								no responding	0
normal specific responding	9								no responding	0
normal specific responding	0								no responding	0
normal specific responding	0								no responding	0
normal specific responding	6								no responding	0
normal specific responding	5								no responding	0
normal specific responding	9								no responding	0
normal specific responding	6
normal specific responding	7
normal specific responding	1
normal specific responding	2
normal specific responding	11
normal specific responding	0
normal specific responding	1
normal specific responding	10
normal specific responding	3
normal specific responding	2
normal specific responding	1
normal specific responding	8
normal specific responding	1
normal specific responding	0
normal specific responding	8
normal specific responding	5
normal specific responding	3
normal specific responding	3
normal specific responding	2
normal specific responding	2
normal specific responding	7
normal specific responding	1
normal specific responding	0
normal specific responding	3
normal specific responding	10
normal specific responding	1
normal specific responding	6
normal specific responding	7
normal specific responding	2
normal specific responding	2
normal specific responding	0
normal specific responding	2
normal specific responding	1
normal specific responding	3
normal specific responding	5
normal specific responding	3
normal specific responding	9
normal specific responding	0
normal specific responding	2
normal specific responding	6
normal specific responding	1
normal specific responding	5
normal specific responding	6
normal specific responding	2
normal specific responding	3
normal specific responding	0
normal specific responding	5
normal specific responding	4
normal specific responding	3
normal specific responding	2
normal specific responding	7
normal specific responding	3
normal specific responding	1
normal specific responding	10
normal specific responding	0
normal specific responding	1
normal specific responding	1
normal specific responding	4
normal specific responding	1
normal specific responding	1
normal specific responding	0
normal specific responding	2
normal specific responding	5
normal specific responding	0
normal specific responding	0
normal specific responding	1
normal specific responding	6
normal specific responding	2
normal specific responding	3
normal specific responding	2
normal specific responding	5
normal specific responding	1
normal specific responding	0
normal specific responding	0
normal specific responding	0
normal specific responding	0
normal specific responding	2
normal specific responding	0
normal specific responding	6
normal specific responding	2
normal specific responding	0
normal specific responding	0
normal specific responding	1
normal specific responding	3
normal specific responding	0
normal specific responding	0
normal specific responding	2
normal specific responding	0
normal specific responding	6
normal specific responding	3
normal specific responding	2
normal specific responding	3
normal specific responding	3
normal specific responding	0
normal specific responding	2
normal specific responding	2
normal specific responding	0
normal specific responding	0
normal specific responding	1
normal specific responding	4
normal specific responding	4
normal specific responding	0
normal specific responding	8
normal specific responding	1
normal specific responding	2
normal specific responding	4
normal specific responding	0
normal specific responding	1
normal specific responding	3
normal specific responding	4
normal specific responding	1
normal specific responding	0
normal specific responding	1
normal specific responding	1
normal specific responding	0
normal specific responding	1
normal specific responding	2
normal specific responding	1
normal specific responding	0
normal specific responding	0
normal specific responding	4
normal specific responding	0
normal specific responding	1
normal specific responding	2
normal specific responding	1
normal specific responding	1
normal specific responding	1
normal specific responding	2
normal specific responding	1
normal specific responding	1
normal specific responding	0
normal specific responding	1
normal specific responding	0
normal specific responding	1
normal specific responding	0
normal specific responding	0
normal specific responding	3
normal specific responding	1
normal specific responding	2
normal specific responding	3
normal specific responding	3
normal specific responding	12
normal specific responding	9
normal specific responding	4
normal specific responding	4
normal specific responding	8
normal specific responding	3
normal specific responding	10
normal specific responding	7
normal specific responding	4
normal specific responding	22
normal specific responding	2
normal specific responding	5
normal specific responding	2
normal specific responding	0
normal specific responding	1
normal specific responding	5
normal specific responding	1
normal specific responding	1
normal specific responding	2
normal specific responding	1
normal specific responding	0
normal specific responding	0
normal specific responding	3
normal specific responding	6
normal specific responding	9
normal specific responding	7
normal specific responding	1
normal specific responding	0
normal specific responding	4
normal specific responding	39
normal specific responding	5
normal specific responding	23
normal specific responding	28
normal specific responding	22
normal specific responding	24
normal specific responding	7
normal specific responding	12
normal specific responding	12
normal specific responding	3
normal specific responding	2
normal specific responding	1
normal specific responding	76
normal specific responding	28
normal specific responding	25
normal specific responding	2
normal specific responding	4
normal specific responding	19
normal specific responding	0
normal specific responding	18
no responding	38
no responding	39
no responding	24
no responding	13
no responding	23
no responding	33
no responding	33
no responding	30
no responding	10
no responding	3
no responding	3
no responding	13
no responding	24
no responding	1
no responding	16
no responding	20
no responding	17
no responding	9
no responding	3
no responding	0
no responding	15
no responding	15
no responding	17
no responding	4
no responding	15
no responding	1
no responding	1
no responding	14
no responding	12
no responding	12
no responding	14
no responding	10
no responding	18
no responding	1
no responding	9
no responding	11
no responding	5
no responding	1
no responding	15
no responding	7
no responding	11
no responding	4
no responding	2
no responding	5
no responding	3
no responding	1
no responding	7
no responding	3
no responding	10
no responding	2
no responding	1
no responding	10
no responding	5
no responding	2
no responding	9
no responding	6
no responding	0
no responding	1
no responding	10
no responding	4
no responding	1
no responding	10
no responding	9
no responding	6
no responding	8
no responding	3
no responding	0
no responding	4
no responding	0
no responding	8
no responding	1
no responding	2
no responding	4
no responding	6
no responding	0
no responding	2
no responding	4
no responding	1
no responding	3
no responding	7
no responding	2
no responding	9
no responding	5
no responding	0
no responding	7
no responding	5
no responding	1
no responding	5
no responding	5
no responding	9
no responding	3
no responding	0
no responding	7
no responding	7
no responding	4
no responding	2
no responding	0
no responding	6
no responding	0
no responding	5
no responding	1
no responding	5
no responding	2
no responding	7
no responding	3
no responding	9
no responding	6
no responding	1
no responding	7
no responding	7
no responding	0
no responding	9
no responding	0
no responding	9
no responding	3
no responding	0
no responding	5
no responding	3
no responding	2
no responding	1
no responding	0
no responding	0
no responding	2
no responding	4
no responding	6
no responding	0
no responding	1
no responding	0
no responding	0
no responding	1
no responding	9
no responding	7
no responding	0
no responding	1
no responding	0
no responding	3
no responding	1
no responding	11
no responding	5
no responding	0
no responding	1
no responding	3
no responding	0
no responding	0
no responding	0
no responding	1
no responding	3
no responding	1
no responding	4
no responding	1
no responding	1
no responding	7
no responding	0
no responding	1
no responding	6
no responding	5
no responding	0
no responding	0
no responding	0
no responding	5
no responding	4
no responding	0
no responding	0
no responding	1
no responding	2
no responding	2
no responding	2
no responding	0
no responding	0
no responding	3
no responding	0
no responding	0
no responding	1
no responding	0
no responding	6
no responding	1
no responding	2
no responding	3
no responding	0
no responding	0
no responding	1
no responding	0
no responding	0
no responding	0
no responding	1
no responding	2
no responding	5
no responding	2
no responding	0
no responding	1
no responding	0
no responding	3
no responding	0
no responding	3
no responding	1
no responding	0
no responding	4
no responding	4
no responding	5
no responding	4
no responding	3
no responding	2
no responding	3
no responding	6
no responding	3
no responding	1
no responding	1
no responding	1
no responding	2
no responding	4
no responding	0
no responding	3
no responding	0
no responding	1
no responding	1
no responding	4
no responding	2
no responding	2
no responding	4
no responding	0
no responding	1
no responding	4
no responding	4
no responding	3
no responding	0
no responding	3
no responding	3
no responding	3
no responding	1
no responding	0
no responding	0
no responding	0
no responding	2
no responding	1
no responding	0
no responding	2
no responding	2
no responding	1
no responding	3
no responding	1
no responding	2
no responding	0
no responding	3
no responding	0
no responding	4
no responding	0
no responding	6
no responding	0
no responding	5
no responding	0
no responding	4
no responding	0
no responding	0
no responding	1
no responding	3
no responding	3
no responding	1
no responding	0
no responding	1
no responding	0
no responding	0
no responding	0
no responding	0
no responding	0
no responding	5
no responding	1
no responding	2
no responding	1
no responding	0
no responding	2
no responding	5
no responding	2
no responding	2
no responding	1
no responding	0
no responding	0
no responding	3
no responding	0
no responding	0
no responding	2
no responding	1
no responding	0
no responding	0
no responding	0
no responding	1
no responding	0
no responding	0
no responding	0
no responding	0
no responding	2
no responding	1
no responding	1
no responding	1
no responding	0
no responding	0
no responding	0
no responding	2
no responding	3
no responding	0
no responding	1
no responding	2
no responding	1
no responding	3
no responding	0
no responding	1
no responding	1
no responding	0
no responding	1
no responding	1
no responding	1
no responding	1
no responding	0
no responding	0
no responding	0
no responding	0
no responding	1
no responding	0
no responding	1
no responding	1
no responding	1
no responding	3
no responding	0
no responding	0
no responding	1
no responding	0
no responding	1
no responding	3
no responding	0
no responding	2
no responding	0
no responding	0
no responding	0
no responding	1
no responding	1
no responding	1
no responding	0
no responding	0
no responding	0
no responding	2
no responding	0
no responding	0
no responding	0
no responding	3
no responding	0
no responding	0
no responding	0
no responding	0
no responding	11
no responding	5
no responding	16
no responding	2
no responding	3
no responding	26
no responding	27
no responding	2
no responding	11
no responding	20
no responding	0
no responding	0
no responding	4
no responding	2
no responding	7
no responding	4
no responding	1
no responding	3
no responding	0
no responding	0
no responding	1
no responding	0
no responding	6
no responding	21
no responding	0
no responding	0
no responding	0
no responding	0
no responding	0
no responding	0
no responding	0
no responding	0
no responding	0
no responding	0
no responding	0
no responding	0
no responding	13
no responding	3
no responding	12
no responding	2
no responding	4
no responding	3
no responding	8
no responding	9
no responding	6
no responding	6
no responding	0
no responding	2
no responding	9
no responding	0
no responding	0
no responding	9
no responding	4
no responding	5
no responding	3
no responding	8
no responding	3
no responding	4
no responding	4
no responding	4
no responding	4
no responding	1
no responding	2
no responding	5
no responding	3
no responding	1
no responding	8
no responding	5
no responding	1
no responding	2
no responding	1
no responding	8
no responding	9
no responding	2
no responding	8
no responding	1
no responding	2
no responding	4
no responding	2
divergent responding	10
divergent responding	37
divergent responding	17
divergent responding	4
divergent responding	55
divergent responding	52
divergent responding	52
divergent responding	38
divergent responding	38
divergent responding	16
divergent responding	3
divergent responding	28
divergent responding	15
divergent responding	21
divergent responding	35
divergent responding	6
divergent responding	44
divergent responding	14
divergent responding	12
divergent responding	30
divergent responding	24
divergent responding	15
divergent responding	34
divergent responding	7
divergent responding	31
divergent responding	26
divergent responding	1
divergent responding	4
divergent responding	15
divergent responding	7
divergent responding	16
divergent responding	9
divergent responding	9
divergent responding	8
divergent responding	25
divergent responding	9
divergent responding	14
divergent responding	8
divergent responding	8
divergent responding	31
divergent responding	22
divergent responding	20
divergent responding	2
divergent responding	4
divergent responding	14
divergent responding	3
divergent responding	9
divergent responding	19
divergent responding	19
divergent responding	11
divergent responding	8
divergent responding	4
divergent responding	8
divergent responding	3
divergent responding	8
divergent responding	9
divergent responding	10
divergent responding	4
divergent responding	14
divergent responding	10
divergent responding	8
divergent responding	8
divergent responding	0
divergent responding	5
divergent responding	6
divergent responding	12
divergent responding	5
divergent responding	9
divergent responding	2
divergent responding	5
divergent responding	9
divergent responding	3
divergent responding	11
divergent responding	2
divergent responding	5
divergent responding	6
divergent responding	3
divergent responding	6
divergent responding	13
divergent responding	5
divergent responding	4
divergent responding	5
divergent responding	5
divergent responding	2
divergent responding	5
divergent responding	2
divergent responding	2
divergent responding	2
divergent responding	7
divergent responding	3
divergent responding	4
divergent responding	5
divergent responding	5
divergent responding	2
divergent responding	4
divergent responding	7
divergent responding	3
divergent responding	0
divergent responding	3
divergent responding	2
divergent responding	12
divergent responding	3
divergent responding	6
divergent responding	10
divergent responding	3
divergent responding	7
divergent responding	2
divergent responding	0
divergent responding	8
divergent responding	2
divergent responding	3
divergent responding	1
divergent responding	8
divergent responding	0
divergent responding	0
divergent responding	0
divergent responding	0
divergent responding	2
divergent responding	2
divergent responding	6
divergent responding	4
divergent responding	4
divergent responding	3
divergent responding	1
divergent responding	0
divergent responding	2
divergent responding	0
divergent responding	3
divergent responding	4
divergent responding	1
divergent responding	4
divergent responding	6
divergent responding	2
divergent responding	1
divergent responding	3
divergent responding	2
divergent responding	1
divergent responding	1
divergent responding	5
divergent responding	4
divergent responding	1
divergent responding	1
divergent responding	0
divergent responding	2
divergent responding	3
divergent responding	2
divergent responding	0
divergent responding	1
divergent responding	2
divergent responding	2
divergent responding	2
divergent responding	0
divergent responding	2
divergent responding	0
divergent responding	2
divergent responding	4
divergent responding	7
divergent responding	0
divergent responding	1
divergent responding	2
divergent responding	0
divergent responding	0
divergent responding	2
divergent responding	1
divergent responding	3
divergent responding	0
divergent responding	1
divergent responding	1
divergent responding	0
divergent responding	1
divergent responding	0
divergent responding	18
divergent responding	20
divergent responding	27
divergent responding	15
divergent responding	11
divergent responding	21
divergent responding	19
divergent responding	21
divergent responding	17
divergent responding	12
divergent responding	3
divergent responding	11
divergent responding	2
divergent responding	3
divergent responding	2
divergent responding	3
divergent responding	3
divergent responding	7
divergent responding	15
divergent responding	23
divergent responding	0
divergent responding	1
divergent responding	0
divergent responding	22
divergent responding	7
divergent responding	1
divergent responding	2
divergent responding	0
divergent responding	0
divergent responding	1
divergent responding	5
divergent responding	0
divergent responding	1
divergent responding	2
divergent responding	2
divergent responding	1
divergent responding	1
divergent responding	1
divergent responding	0
divergent responding	1
divergent responding	0
divergent responding	0
divergent responding	6
divergent responding	0
divergent responding	0
divergent responding	1
divergent responding	6
divergent responding	9
divergent responding	6
divergent responding	4
divergent responding	5
divergent responding	10
divergent responding	0
divergent responding	6
divergent responding	11
divergent responding	3
divergent responding	1
divergent responding	7
divergent responding	3
divergent responding	5
divergent responding	2
divergent responding	8
divergent responding	4
divergent responding	7
divergent responding	10
divergent responding	5
divergent responding	1
divergent responding	5
divergent responding	1
consistent responding	2
consistent responding	10
consistent responding	4
consistent responding	5
consistent responding	2
consistent responding	4
consistent responding	4
consistent responding	2
consistent responding	7
consistent responding	0
consistent responding	0
consistent responding	2
consistent responding	2
consistent responding	0
consistent responding	0
consistent responding	0
consistent responding	3
consistent responding	1
consistent responding	0
consistent responding	2
consistent responding	3
consistent responding	5
consistent responding	2
consistent responding	0
consistent responding	3
consistent responding	1
