# Supplementary material for: Systematic Analysis of Time-Series Gene Expression Data on Tumor Cell-Selective Apoptotic Responses to HDAC Inhibitors
Source: Comput Math Methods Med. 2014 Oct 13;2014:867289. doi: 10.1155/2014/867289 (PMC4211306; doi:10.1155/2014/867289)
Supplement: Supplementary file 1 — Table S1. H-score of all pathways for tumor and normal samples: This table lists the name, category, website and H-score values for all 1307 pathway. Table S2. Illustrative pathways belonging to term "No responding": This table lists the name, category, website and TVPC patterns for "No responding" pathways. Table S3. Illustrative pathways belonging to term "Consistent responding": This table lists the name, category, website and TVPC patterns for "Consistent responding" pathways. Table S4. Illustrative pathways belonging to term "Tumor specific responding": This table lists the name, category, website and TVPC patterns for "Tumor specific responding" pathways. Table S5. Illustrative pathways belonging to term "Normal specific responding": This table lists the name, category, web site and TVPC patterns for "Normal specific responding" pathways. Table S6. Illustrative pathways belonging to term "Divergent responding": This table lists the name, category, website and TVPC patterns for "Divergent responding" pathways. Table S7. Genes within profile #0 for normal samples: This table contains all genes within profile #0 for normal samples, and lists the normalized expression data to the right of gene symbol. Table S8. Genes within profile #2 for normal samples: This table contains all genes within profile #2 for normal samples, and lists the normalized expression data to the right of gene symbol. Table S9. Genes within profile #9 for normal samples: This table contains all genes within profile #9 for normal samples, and lists the normalized expression data to the right of gene symbol. Table S10. Genes within profile #12 for normal samples: This table contains all genes within profile # 12 for normal samples, and lists the normalized expression data to the right of gene symbol. Table S11. Genes within profile #14 for normal samples: This table contains all genes within profile #14 for normal samples, and lists the normalized expression data to the right of gene symbol. Ta [file 867289.f1.zip › 867289.f1/Table S2.xls]

## Sheet: Sheet1
Pathway name	Categories	NO.all	NO.in	Web site	Pattern-tumor	Pattern-normal	Term	OMIC gene counts
GO OXIDOREDUCTASE ACTIVITY	Molecular function	289	269	http://www.broadinstitute.org/gsea/msigdb/cards/OXIDOREDUCTASE_ACTIVITY	1111	1111	no responding	3
GO STRUCTURAL CONSTITUENT OF RIBOSOME	Molecular function	80	75	http://www.broadinstitute.org/gsea/msigdb/cards/STRUCTURAL_CONSTITUENT_OF_RIBOSOME	1111	1111	no responding	2
KEGG SMALL CELL LUNG CANCER	Human Diseases	84	82	http://www.broadinstitute.org/gsea/msigdb/cards/KEGG_SMALL_CELL_LUNG_CANCER	1111	1111	no responding	16
KEGG RIBOSOME	Genetic Information Processing	88	79	http://www.broadinstitute.org/gsea/msigdb/cards/KEGG_RIBOSOME	1111	1111	no responding	3
GO TRANSFERASE ACTIVITY TRANSFERRING PHOSPHORUS CONTAINING GROUPS	Molecular function	424	396	http://www.broadinstitute.org/gsea/msigdb/cards/TRANSFERASE_ACTIVITY_TRANSFERRING_PHOSPHORUS_CONTAINING_GROUPS	1111	0000	no responding	24
GO KINASE ACTIVITY	Molecular function	369	345	http://www.broadinstitute.org/gsea/msigdb/cards/KINASE_ACTIVITY	1111	0000	no responding	23
KEGG CHRONIC MYELOID LEUKEMIA	Human Diseases	73	72	http://www.broadinstitute.org/gsea/msigdb/cards/KEGG_CHRONIC_MYELOID_LEUKEMIA	1111	0000	no responding	26
BIOCARTA MAPK PATHWAY	Cell Signaling	87	85	http://www.broadinstitute.org/gsea/msigdb/cards/BIOCARTA_MAPK_PATHWAY	1111	0000	no responding	13
BIOCARTA HER2 PATHWAY	Cell Signaling	22	22	http://www.broadinstitute.org/gsea/msigdb/cards/BIOCARTA_HER2_PATHWAY	1111	0000	no responding	9
GO NUCLEAR CHROMOSOME PART	Cellular component	34	31	http://www.broadinstitute.org/gsea/msigdb/cards/NUCLEAR_CHROMOSOME_PART	0000	1111	no responding	2
KEGG NUCLEOTIDE EXCISION REPAIR	Genetic Information Processing	44	44	http://www.broadinstitute.org/gsea/msigdb/cards/KEGG_NUCLEOTIDE_EXCISION_REPAIR	0000	1111	no responding	7
KEGG CITRATE CYCLE TCA CYCLE	Metabolism	32	29	http://www.broadinstitute.org/gsea/msigdb/cards/KEGG_CITRATE_CYCLE_TCA_CYCLE	0000	1111	no responding	6
GO RESPONSE TO STRESS	Biological process	508	467	http://www.broadinstitute.org/gsea/msigdb/cards/RESPONSE_TO_STRESS	0000	0000	no responding	38
GO REGULATION OF DEVELOPMENTAL PROCESS	Biological process	440	399	http://www.broadinstitute.org/gsea/msigdb/cards/REGULATION_OF_DEVELOPMENTAL_PROCESS	0000	0000	no responding	39
GO NERVOUS SYSTEM DEVELOPMENT	Biological process	385	358	http://www.broadinstitute.org/gsea/msigdb/cards/NERVOUS_SYSTEM_DEVELOPMENT	0000	0000	no responding	13
GO REGULATION OF PROGRAMMED CELL DEATH	Biological process	342	312	http://www.broadinstitute.org/gsea/msigdb/cards/REGULATION_OF_PROGRAMMED_CELL_DEATH	0000	0000	no responding	33
GO REGULATION OF APOPTOSIS	Biological process	341	311	http://www.broadinstitute.org/gsea/msigdb/cards/REGULATION_OF_APOPTOSIS	0000	0000	no responding	33
GO REGULATION OF MOLECULAR FUNCTION	Biological process	324	294	http://www.broadinstitute.org/gsea/msigdb/cards/REGULATION_OF_MOLECULAR_FUNCTION	0000	0000	no responding	30
GO RESPONSE TO EXTERNAL STIMULUS	Biological process	312	287	http://www.broadinstitute.org/gsea/msigdb/cards/RESPONSE_TO_EXTERNAL_STIMULUS	0000	0000	no responding	10
GO ION TRANSMEMBRANE TRANSPORTER ACTIVITY	Molecular function	278	265	http://www.broadinstitute.org/gsea/msigdb/cards/ION_TRANSMEMBRANE_TRANSPORTER_ACTIVITY	0000	0000	no responding	3
GO ION BINDING	Molecular function	273	254	http://www.broadinstitute.org/gsea/msigdb/cards/ION_BINDING	0000	0000	no responding	13
GO REGULATION OF CATALYTIC ACTIVITY	Biological process	276	252	http://www.broadinstitute.org/gsea/msigdb/cards/REGULATION_OF_CATALYTIC_ACTIVITY	0000	0000	no responding	24
GO CATION TRANSMEMBRANE TRANSPORTER ACTIVITY	Molecular function	213	206	http://www.broadinstitute.org/gsea/msigdb/cards/CATION_TRANSMEMBRANE_TRANSPORTER_ACTIVITY	0000	0000	no responding	1
GO REGULATION OF SIGNAL TRANSDUCTION	Biological process	222	200	http://www.broadinstitute.org/gsea/msigdb/cards/REGULATION_OF_SIGNAL_TRANSDUCTION	0000	0000	no responding	16
GO POSITIVE REGULATION OF DEVELOPMENTAL PROCESS	Biological process	218	197	http://www.broadinstitute.org/gsea/msigdb/cards/POSITIVE_REGULATION_OF_DEVELOPMENTAL_PROCESS	0000	0000	no responding	20
GO NEGATIVE REGULATION OF DEVELOPMENTAL PROCESS	Biological process	197	181	http://www.broadinstitute.org/gsea/msigdb/cards/NEGATIVE_REGULATION_OF_DEVELOPMENTAL_PROCESS	0000	0000	no responding	17
GO VESICLE MEDIATED TRANSPORT	Biological process	194	180	http://www.broadinstitute.org/gsea/msigdb/cards/VESICLE_MEDIATED_TRANSPORT	0000	0000	no responding	9
GO ION TRANSPORT	Biological process	185	175	http://www.broadinstitute.org/gsea/msigdb/cards/ION_TRANSPORT	0000	0000	no responding	3
GO SECRETION	Biological process	178	161	http://www.broadinstitute.org/gsea/msigdb/cards/SECRETION	0000	0000	no responding	0
GO REGULATION OF TRANSFERASE ACTIVITY	Biological process	161	149	http://www.broadinstitute.org/gsea/msigdb/cards/REGULATION_OF_TRANSFERASE_ACTIVITY	0000	0000	no responding	15
GO REGULATION OF KINASE ACTIVITY	Biological process	157	146	http://www.broadinstitute.org/gsea/msigdb/cards/REGULATION_OF_KINASE_ACTIVITY	0000	0000	no responding	15
GO NEGATIVE REGULATION OF CELL PROLIFERATION	Biological process	156	146	http://www.broadinstitute.org/gsea/msigdb/cards/NEGATIVE_REGULATION_OF_CELL_PROLIFERATION	0000	0000	no responding	17
GO PHOSPHORIC ESTER HYDROLASE ACTIVITY	Molecular function	153	145	http://www.broadinstitute.org/gsea/msigdb/cards/PHOSPHORIC_ESTER_HYDROLASE_ACTIVITY	0000	0000	no responding	4
GO REGULATION OF PROTEIN KINASE ACTIVITY	Biological process	155	144	http://www.broadinstitute.org/gsea/msigdb/cards/REGULATION_OF_PROTEIN_KINASE_ACTIVITY	0000	0000	no responding	15
GO METAL ION TRANSMEMBRANE TRANSPORTER ACTIVITY	Molecular function	147	141	http://www.broadinstitute.org/gsea/msigdb/cards/METAL_ION_TRANSMEMBRANE_TRANSPORTER_ACTIVITY	0000	0000	no responding	1
GO CATION TRANSPORT	Biological process	147	139	http://www.broadinstitute.org/gsea/msigdb/cards/CATION_TRANSPORT	0000	0000	no responding	1
GO REGULATION OF CELLULAR PROTEIN METABOLIC PROCESS	Biological process	162	139	http://www.broadinstitute.org/gsea/msigdb/cards/REGULATION_OF_CELLULAR_PROTEIN_METABOLIC_PROCESS	0000	0000	no responding	14
GO NEGATIVE REGULATION OF PROGRAMMED CELL DEATH	Biological process	151	138	http://www.broadinstitute.org/gsea/msigdb/cards/NEGATIVE_REGULATION_OF_PROGRAMMED_CELL_DEATH	0000	0000	no responding	12
GO NEGATIVE REGULATION OF APOPTOSIS	Biological process	150	137	http://www.broadinstitute.org/gsea/msigdb/cards/NEGATIVE_REGULATION_OF_APOPTOSIS	0000	0000	no responding	12
GO ORGAN MORPHOGENESIS	Biological process	144	134	http://www.broadinstitute.org/gsea/msigdb/cards/ORGAN_MORPHOGENESIS	0000	0000	no responding	14
GO MEMBRANE ORGANIZATION AND BIOGENESIS	Biological process	135	124	http://www.broadinstitute.org/gsea/msigdb/cards/MEMBRANE_ORGANIZATION_AND_BIOGENESIS	0000	0000	no responding	10
GO POSITIVE REGULATION OF TRANSCRIPTION	Biological process	144	119	http://www.broadinstitute.org/gsea/msigdb/cards/POSITIVE_REGULATION_OF_TRANSCRIPTION	0000	0000	no responding	18
GO CATION CHANNEL ACTIVITY	Molecular function	119	114	http://www.broadinstitute.org/gsea/msigdb/cards/CATION_CHANNEL_ACTIVITY	0000	0000	no responding	1
GO POSITIVE REGULATION OF SIGNAL TRANSDUCTION	Biological process	126	113	http://www.broadinstitute.org/gsea/msigdb/cards/POSITIVE_REGULATION_OF_SIGNAL_TRANSDUCTION	0000	0000	no responding	9
GO PROTEIN HOMODIMERIZATION ACTIVITY	Molecular function	121	113	http://www.broadinstitute.org/gsea/msigdb/cards/PROTEIN_HOMODIMERIZATION_ACTIVITY	0000	0000	no responding	11
GO CENTRAL NERVOUS SYSTEM DEVELOPMENT	Biological process	123	112	http://www.broadinstitute.org/gsea/msigdb/cards/CENTRAL_NERVOUS_SYSTEM_DEVELOPMENT	0000	0000	no responding	5
GO METAL ION TRANSPORT	Biological process	117	111	http://www.broadinstitute.org/gsea/msigdb/cards/METAL_ION_TRANSPORT	0000	0000	no responding	1
GO TRANSCRIPTION COACTIVATOR ACTIVITY	Molecular function	123	111	http://www.broadinstitute.org/gsea/msigdb/cards/TRANSCRIPTION_COACTIVATOR_ACTIVITY	0000	0000	no responding	15
GO ANTI APOPTOSIS	Biological process	118	109	http://www.broadinstitute.org/gsea/msigdb/cards/ANTI_APOPTOSIS	0000	0000	no responding	7
GO REGULATION OF CELLULAR COMPONENT ORGANIZATION AND BIOGENESIS	Biological process	125	108	http://www.broadinstitute.org/gsea/msigdb/cards/REGULATION_OF_CELLULAR_COMPONENT_ORGANIZATION_AND_BIOGENESIS	0000	0000	no responding	11
GO CYTOPLASMIC MEMBRANE BOUND VESICLE	Cellular component	115	102	http://www.broadinstitute.org/gsea/msigdb/cards/CYTOPLASMIC_MEMBRANE_BOUND_VESICLE	0000	0000	no responding	4
GO GAMETE GENERATION	Biological process	114	100	http://www.broadinstitute.org/gsea/msigdb/cards/GAMETE_GENERATION	0000	0000	no responding	2
GO CELL PROJECTION	Cellular component	108	98	http://www.broadinstitute.org/gsea/msigdb/cards/CELL_PROJECTION	0000	0000	no responding	5
GO NEUROGENESIS	Biological process	93	90	http://www.broadinstitute.org/gsea/msigdb/cards/NEUROGENESIS	0000	0000	no responding	3
GO MONOVALENT INORGANIC CATION TRANSPORT	Biological process	94	89	http://www.broadinstitute.org/gsea/msigdb/cards/MONOVALENT_INORGANIC_CATION_TRANSPORT	0000	0000	no responding	1
GO LIGASE ACTIVITY	Molecular function	97	89	http://www.broadinstitute.org/gsea/msigdb/cards/LIGASE_ACTIVITY	0000	0000	no responding	7
GO LOCOMOTORY BEHAVIOR	Biological process	95	86	http://www.broadinstitute.org/gsea/msigdb/cards/LOCOMOTORY_BEHAVIOR	0000	0000	no responding	3
GO RESPONSE TO ABIOTIC STIMULUS	Biological process	89	86	http://www.broadinstitute.org/gsea/msigdb/cards/RESPONSE_TO_ABIOTIC_STIMULUS	0000	0000	no responding	10
GO MONOCARBOXYLIC ACID METABOLIC PROCESS	Biological process	88	81	http://www.broadinstitute.org/gsea/msigdb/cards/MONOCARBOXYLIC_ACID_METABOLIC_PROCESS	0000	0000	no responding	2
GO GENERATION OF NEURONS	Biological process	83	80	http://www.broadinstitute.org/gsea/msigdb/cards/GENERATION_OF_NEURONS	0000	0000	no responding	1
GO IMMUNE SYSTEM DEVELOPMENT	Biological process	81	76	http://www.broadinstitute.org/gsea/msigdb/cards/IMMUNE_SYSTEM_DEVELOPMENT	0000	0000	no responding	10
GO REGULATION OF TRANSLATION	Biological process	93	75	http://www.broadinstitute.org/gsea/msigdb/cards/REGULATION_OF_TRANSLATION	0000	0000	no responding	5
GO NEGATIVE REGULATION OF CELL CYCLE	Biological process	79	74	http://www.broadinstitute.org/gsea/msigdb/cards/NEGATIVE_REGULATION_OF_CELL_CYCLE	0000	0000	no responding	9
GO PROTEIN HETERODIMERIZATION ACTIVITY	Molecular function	77	74	http://www.broadinstitute.org/gsea/msigdb/cards/PROTEIN_HETERODIMERIZATION_ACTIVITY	0000	0000	no responding	6
GO NEURON DIFFERENTIATION	Biological process	76	73	http://www.broadinstitute.org/gsea/msigdb/cards/NEURON_DIFFERENTIATION	0000	0000	no responding	0
GO LIPID BINDING	Molecular function	87	73	http://www.broadinstitute.org/gsea/msigdb/cards/LIPID_BINDING	0000	0000	no responding	1
GO HEMOPOIETIC OR LYMPHOID ORGAN DEVELOPMENT	Biological process	77	72	http://www.broadinstitute.org/gsea/msigdb/cards/HEMOPOIETIC_OR_LYMPHOID_ORGAN_DEVELOPMENT	0000	0000	no responding	10
GO CELL ACTIVATION	Biological process	77	71	http://www.broadinstitute.org/gsea/msigdb/cards/CELL_ACTIVATION	0000	0000	no responding	4
GO VOLTAGE GATED CHANNEL ACTIVITY	Molecular function	73	71	http://www.broadinstitute.org/gsea/msigdb/cards/VOLTAGE_GATED_CHANNEL_ACTIVITY	0000	0000	no responding	1
GO HEMOPOIESIS	Biological process	75	70	http://www.broadinstitute.org/gsea/msigdb/cards/HEMOPOIESIS	0000	0000	no responding	10
GO REGULATION OF HYDROLASE ACTIVITY	Biological process	79	69	http://www.broadinstitute.org/gsea/msigdb/cards/REGULATION_OF_HYDROLASE_ACTIVITY	0000	0000	no responding	9
GO NEGATIVE REGULATION OF CATALYTIC ACTIVITY	Biological process	69	68	http://www.broadinstitute.org/gsea/msigdb/cards/NEGATIVE_REGULATION_OF_CATALYTIC_ACTIVITY	0000	0000	no responding	6
GO GROWTH	Biological process	77	67	http://www.broadinstitute.org/gsea/msigdb/cards/GROWTH	0000	0000	no responding	8
GO REGULATION OF IMMUNE SYSTEM PROCESS	Biological process	67	66	http://www.broadinstitute.org/gsea/msigdb/cards/REGULATION_OF_IMMUNE_SYSTEM_PROCESS	0000	0000	no responding	3
GO STEROID METABOLIC PROCESS	Biological process	71	65	http://www.broadinstitute.org/gsea/msigdb/cards/STEROID_METABOLIC_PROCESS	0000	0000	no responding	0
GO LEUKOCYTE ACTIVATION	Biological process	69	65	http://www.broadinstitute.org/gsea/msigdb/cards/LEUKOCYTE_ACTIVATION	0000	0000	no responding	4
GO CARBOHYDRATE BINDING	Molecular function	72	65	http://www.broadinstitute.org/gsea/msigdb/cards/CARBOHYDRATE_BINDING	0000	0000	no responding	0
GO KINASE BINDING	Molecular function	70	65	http://www.broadinstitute.org/gsea/msigdb/cards/KINASE_BINDING	0000	0000	no responding	8
GO VOLTAGE GATED CATION CHANNEL ACTIVITY	Molecular function	66	65	http://www.broadinstitute.org/gsea/msigdb/cards/VOLTAGE_GATED_CATION_CHANNEL_ACTIVITY	0000	0000	no responding	1
GO VACUOLE	Cellular component	69	63	http://www.broadinstitute.org/gsea/msigdb/cards/VACUOLE	0000	0000	no responding	2
GO REGULATION OF MAP KINASE ACTIVITY	Biological process	67	63	http://www.broadinstitute.org/gsea/msigdb/cards/REGULATION_OF_MAP_KINASE_ACTIVITY	0000	0000	no responding	4
GO INTERPHASE	Biological process	68	62	http://www.broadinstitute.org/gsea/msigdb/cards/INTERPHASE	0000	0000	no responding	6
GO NEURON DEVELOPMENT	Biological process	61	60	http://www.broadinstitute.org/gsea/msigdb/cards/NEURON_DEVELOPMENT	0000	0000	no responding	0
GO FATTY ACID METABOLIC PROCESS	Biological process	63	58	http://www.broadinstitute.org/gsea/msigdb/cards/FATTY_ACID_METABOLIC_PROCESS	0000	0000	no responding	2
GO LYMPHOCYTE ACTIVATION	Biological process	61	58	http://www.broadinstitute.org/gsea/msigdb/cards/LYMPHOCYTE_ACTIVATION	0000	0000	no responding	4
GO POTASSIUM ION TRANSPORT	Biological process	58	58	http://www.broadinstitute.org/gsea/msigdb/cards/POTASSIUM_ION_TRANSPORT	0000	0000	no responding	1
GO PROTEIN BINDING BRIDGING	Molecular function	59	58	http://www.broadinstitute.org/gsea/msigdb/cards/PROTEIN_BINDING_BRIDGING	0000	0000	no responding	3
GO PROTEIN KINASE BINDING	Molecular function	62	58	http://www.broadinstitute.org/gsea/msigdb/cards/PROTEIN_KINASE_BINDING	0000	0000	no responding	7
GO REGULATION OF RESPONSE TO STIMULUS	Biological process	59	57	http://www.broadinstitute.org/gsea/msigdb/cards/REGULATION_OF_RESPONSE_TO_STIMULUS	0000	0000	no responding	2
GO RESPONSE TO RADIATION	Biological process	60	57	http://www.broadinstitute.org/gsea/msigdb/cards/RESPONSE_TO_RADIATION	0000	0000	no responding	9
GO INTERPHASE OF MITOTIC CELL CYCLE	Biological process	62	57	http://www.broadinstitute.org/gsea/msigdb/cards/INTERPHASE_OF_MITOTIC_CELL_CYCLE	0000	0000	no responding	5
GO INORGANIC CATION TRANSMEMBRANE TRANSPORTER ACTIVITY	Molecular function	58	56	http://www.broadinstitute.org/gsea/msigdb/cards/INORGANIC_CATION_TRANSMEMBRANE_TRANSPORTER_ACTIVITY	0000	0000	no responding	0
GO PROTEIN IMPORT	Biological process	62	55	http://www.broadinstitute.org/gsea/msigdb/cards/PROTEIN_IMPORT	0000	0000	no responding	7
GO APOPTOTIC PROGRAM	Biological process	60	55	http://www.broadinstitute.org/gsea/msigdb/cards/APOPTOTIC_PROGRAM	0000	0000	no responding	5
GO ANION TRANSMEMBRANE TRANSPORTER ACTIVITY	Molecular function	59	55	http://www.broadinstitute.org/gsea/msigdb/cards/ANION_TRANSMEMBRANE_TRANSPORTER_ACTIVITY	0000	0000	no responding	1
GO DNA DIRECTED RNA POLYMERASEII HOLOENZYME	Cellular component	67	54	http://www.broadinstitute.org/gsea/msigdb/cards/DNA_DIRECTED_RNA_POLYMERASEII_HOLOENZYME	0000	0000	no responding	5
GO RECEPTOR COMPLEX	Cellular component	56	54	http://www.broadinstitute.org/gsea/msigdb/cards/RECEPTOR_COMPLEX	0000	0000	no responding	5
GO CELL CYCLE ARREST GO 0007050	Biological process	57	54	http://www.broadinstitute.org/gsea/msigdb/cards/CELL_CYCLE_ARREST_GO_0007050	0000	0000	no responding	9
GO STRUCTURAL CONSTITUENT OF CYTOSKELETON	Molecular function	57	54	http://www.broadinstitute.org/gsea/msigdb/cards/STRUCTURAL_CONSTITUENT_OF_CYTOSKELETON	0000	0000	no responding	3
GO NEURITE DEVELOPMENT	Biological process	53	53	http://www.broadinstitute.org/gsea/msigdb/cards/NEURITE_DEVELOPMENT	0000	0000	no responding	0
GO PROTEIN COMPLEX BINDING	Molecular function	54	53	http://www.broadinstitute.org/gsea/msigdb/cards/PROTEIN_COMPLEX_BINDING	0000	0000	no responding	7
GO REGULATION OF GROWTH	Biological process	58	52	http://www.broadinstitute.org/gsea/msigdb/cards/REGULATION_OF_GROWTH	0000	0000	no responding	7
GO EMBRYONIC DEVELOPMENT	Biological process	58	52	http://www.broadinstitute.org/gsea/msigdb/cards/EMBRYONIC_DEVELOPMENT	0000	0000	no responding	4
GO CELLULAR DEFENSE RESPONSE	Biological process	58	51	http://www.broadinstitute.org/gsea/msigdb/cards/CELLULAR_DEFENSE_RESPONSE	0000	0000	no responding	2
GO G PROTEIN COUPLED RECEPTOR BINDING	Molecular function	54	51	http://www.broadinstitute.org/gsea/msigdb/cards/G_PROTEIN_COUPLED_RECEPTOR_BINDING	0000	0000	no responding	0
GO ANATOMICAL STRUCTURE FORMATION	Biological process	56	50	http://www.broadinstitute.org/gsea/msigdb/cards/ANATOMICAL_STRUCTURE_FORMATION	0000	0000	no responding	6
GO CELLULAR MORPHOGENESIS DURING DIFFERENTIATION	Biological process	49	49	http://www.broadinstitute.org/gsea/msigdb/cards/CELLULAR_MORPHOGENESIS_DURING_DIFFERENTIATION	0000	0000	no responding	0
GO VASCULATURE DEVELOPMENT	Biological process	55	49	http://www.broadinstitute.org/gsea/msigdb/cards/VASCULATURE_DEVELOPMENT	0000	0000	no responding	5
GO POTASSIUM CHANNEL ACTIVITY	Molecular function	50	49	http://www.broadinstitute.org/gsea/msigdb/cards/POTASSIUM_CHANNEL_ACTIVITY	0000	0000	no responding	1
GO TRANSFERASE ACTIVITY TRANSFERRING ACYL GROUPS	Molecular function	59	48	http://www.broadinstitute.org/gsea/msigdb/cards/TRANSFERASE_ACTIVITY_TRANSFERRING_ACYL_GROUPS	0000	0000	no responding	5
GO MOLECULAR ADAPTOR ACTIVITY	Molecular function	49	48	http://www.broadinstitute.org/gsea/msigdb/cards/MOLECULAR_ADAPTOR_ACTIVITY	0000	0000	no responding	2
GO POSITIVE REGULATION OF HYDROLASE ACTIVITY	Biological process	55	47	http://www.broadinstitute.org/gsea/msigdb/cards/POSITIVE_REGULATION_OF_HYDROLASE_ACTIVITY	0000	0000	no responding	7
GO HEMOSTASIS	Biological process	48	46	http://www.broadinstitute.org/gsea/msigdb/cards/HEMOSTASIS	0000	0000	no responding	3
GO UBIQUITIN CYCLE	Biological process	48	46	http://www.broadinstitute.org/gsea/msigdb/cards/UBIQUITIN_CYCLE	0000	0000	no responding	9
GO SMALL PROTEIN CONJUGATING ENZYME ACTIVITY	Molecular function	52	46	http://www.broadinstitute.org/gsea/msigdb/cards/SMALL_PROTEIN_CONJUGATING_ENZYME_ACTIVITY	0000	0000	no responding	6
GO GOLGI VESICLE TRANSPORT	Biological process	48	45	http://www.broadinstitute.org/gsea/msigdb/cards/GOLGI_VESICLE_TRANSPORT	0000	0000	no responding	1
GO RESPONSE TO LIGHT STIMULUS	Biological process	46	44	http://www.broadinstitute.org/gsea/msigdb/cards/RESPONSE_TO_LIGHT_STIMULUS	0000	0000	no responding	7
GO NEGATIVE REGULATION OF PROTEIN METABOLIC PROCESS	Biological process	48	44	http://www.broadinstitute.org/gsea/msigdb/cards/NEGATIVE_REGULATION_OF_PROTEIN_METABOLIC_PROCESS	0000	0000	no responding	7
GO METALLOPEPTIDASE ACTIVITY	Molecular function	50	44	http://www.broadinstitute.org/gsea/msigdb/cards/METALLOPEPTIDASE_ACTIVITY	0000	0000	no responding	0
GO KINASE REGULATOR ACTIVITY	Molecular function	46	44	http://www.broadinstitute.org/gsea/msigdb/cards/KINASE_REGULATOR_ACTIVITY	0000	0000	no responding	9
GO AXONOGENESIS	Biological process	43	43	http://www.broadinstitute.org/gsea/msigdb/cards/AXONOGENESIS	0000	0000	no responding	0
GO REGULATION OF PHOSPHORYLATION	Biological process	49	43	http://www.broadinstitute.org/gsea/msigdb/cards/REGULATION_OF_PHOSPHORYLATION	0000	0000	no responding	9
GO POSITIVE REGULATION OF MAP KINASE ACTIVITY	Biological process	47	43	http://www.broadinstitute.org/gsea/msigdb/cards/POSITIVE_REGULATION_OF_MAP_KINASE_ACTIVITY	0000	0000	no responding	3
GO ORGANIC ACID TRANSPORT	Biological process	42	42	http://www.broadinstitute.org/gsea/msigdb/cards/ORGANIC_ACID_TRANSPORT	0000	0000	no responding	0
GO ANGIOGENESIS	Biological process	48	42	http://www.broadinstitute.org/gsea/msigdb/cards/ANGIOGENESIS	0000	0000	no responding	5
GO T CELL ACTIVATION	Biological process	44	42	http://www.broadinstitute.org/gsea/msigdb/cards/T_CELL_ACTIVATION	0000	0000	no responding	3
GO COAGULATION	Biological process	44	42	http://www.broadinstitute.org/gsea/msigdb/cards/COAGULATION	0000	0000	no responding	2
GO SERINE HYDROLASE ACTIVITY	Molecular function	46	42	http://www.broadinstitute.org/gsea/msigdb/cards/SERINE_HYDROLASE_ACTIVITY	0000	0000	no responding	1
GO HORMONE ACTIVITY	Molecular function	44	42	http://www.broadinstitute.org/gsea/msigdb/cards/HORMONE_ACTIVITY	0000	0000	no responding	0
GO VESICULAR FRACTION	Cellular component	44	41	http://www.broadinstitute.org/gsea/msigdb/cards/VESICULAR_FRACTION	0000	0000	no responding	0
GO COATED VESICLE	Cellular component	47	41	http://www.broadinstitute.org/gsea/msigdb/cards/COATED_VESICLE	0000	0000	no responding	2
GO LEADING EDGE	Cellular component	47	41	http://www.broadinstitute.org/gsea/msigdb/cards/LEADING_EDGE	0000	0000	no responding	4
GO NEGATIVE REGULATION OF CELLULAR PROTEIN METABOLIC PROCESS	Biological process	45	41	http://www.broadinstitute.org/gsea/msigdb/cards/NEGATIVE_REGULATION_OF_CELLULAR_PROTEIN_METABOLIC_PROCESS	0000	0000	no responding	6
GO DIGESTION	Biological process	44	41	http://www.broadinstitute.org/gsea/msigdb/cards/DIGESTION	0000	0000	no responding	0
GO SERINE TYPE PEPTIDASE ACTIVITY	Molecular function	45	41	http://www.broadinstitute.org/gsea/msigdb/cards/SERINE_TYPE_PEPTIDASE_ACTIVITY	0000	0000	no responding	1
GO CHEMOKINE RECEPTOR BINDING	Molecular function	43	41	http://www.broadinstitute.org/gsea/msigdb/cards/CHEMOKINE_RECEPTOR_BINDING	0000	0000	no responding	0
GO GUANYL NUCLEOTIDE EXCHANGE FACTOR ACTIVITY	Molecular function	46	41	http://www.broadinstitute.org/gsea/msigdb/cards/GUANYL_NUCLEOTIDE_EXCHANGE_FACTOR_ACTIVITY	0000	0000	no responding	0
GO VOLTAGE GATED POTASSIUM CHANNEL COMPLEX	Cellular component	40	40	http://www.broadinstitute.org/gsea/msigdb/cards/VOLTAGE_GATED_POTASSIUM_CHANNEL_COMPLEX	0000	0000	no responding	1
GO PROTEIN MODIFICATION BY SMALL PROTEIN CONJUGATION	Biological process	43	40	http://www.broadinstitute.org/gsea/msigdb/cards/PROTEIN_MODIFICATION_BY_SMALL_PROTEIN_CONJUGATION	0000	0000	no responding	9
GO REGULATION OF CELL GROWTH	Biological process	46	40	http://www.broadinstitute.org/gsea/msigdb/cards/REGULATION_OF_CELL_GROWTH	0000	0000	no responding	7
GO CHEMOKINE ACTIVITY	Molecular function	42	40	http://www.broadinstitute.org/gsea/msigdb/cards/CHEMOKINE_ACTIVITY	0000	0000	no responding	0
GO PHOSPHOLIPID BINDING	Molecular function	47	39	http://www.broadinstitute.org/gsea/msigdb/cards/PHOSPHOLIPID_BINDING	0000	0000	no responding	1
GO PHOSPHOLIPASE ACTIVITY	Molecular function	42	39	http://www.broadinstitute.org/gsea/msigdb/cards/PHOSPHOLIPASE_ACTIVITY	0000	0000	no responding	0
GO CYTOKINE BIOSYNTHETIC PROCESS	Biological process	41	38	http://www.broadinstitute.org/gsea/msigdb/cards/CYTOKINE_BIOSYNTHETIC_PROCESS	0000	0000	no responding	3
GO NUCLEOTIDE METABOLIC PROCESS	Biological process	42	38	http://www.broadinstitute.org/gsea/msigdb/cards/NUCLEOTIDE_METABOLIC_PROCESS	0000	0000	no responding	1
GO PROTEIN N TERMINUS BINDING	Molecular function	38	38	http://www.broadinstitute.org/gsea/msigdb/cards/PROTEIN_N_TERMINUS_BINDING	0000	0000	no responding	11
GO PROTEIN KINASE REGULATOR ACTIVITY	Molecular function	39	38	http://www.broadinstitute.org/gsea/msigdb/cards/PROTEIN_KINASE_REGULATOR_ACTIVITY	0000	0000	no responding	5
GO ATPASE ACTIVITY COUPLED TO MOVEMENT OF SUBSTANCES	Molecular function	40	38	http://www.broadinstitute.org/gsea/msigdb/cards/ATPASE_ACTIVITY_COUPLED_TO_MOVEMENT_OF_SUBSTANCES	0000	0000	no responding	0
GO ACTIVATION OF MAPK ACTIVITY	Biological process	41	37	http://www.broadinstitute.org/gsea/msigdb/cards/ACTIVATION_OF_MAPK_ACTIVITY	0000	0000	no responding	1
GO ENERGY DERIVATION BY OXIDATION OF ORGANIC COMPOUNDS	Biological process	37	37	http://www.broadinstitute.org/gsea/msigdb/cards/ENERGY_DERIVATION_BY_OXIDATION_OF_ORGANIC_COMPOUNDS	0000	0000	no responding	3
GO HYDROLASE ACTIVITY ACTING ON ACID ANHYDRIDESCATALYZING TRANSMEMBRANE MOVEMENT OF SUBSTANCES	Molecular function	39	37	http://www.broadinstitute.org/gsea/msigdb/cards/HYDROLASE_ACTIVITY_ACTING_ON_ACID_ANHYDRIDESCATALYZING_TRANSMEMBRANE_MOVEMENT_OF_SUBSTANCES	0000	0000	no responding	0
GO PHOSPHORIC DIESTER HYDROLASE ACTIVITY	Molecular function	40	37	http://www.broadinstitute.org/gsea/msigdb/cards/PHOSPHORIC_DIESTER_HYDROLASE_ACTIVITY	0000	0000	no responding	0
GO PATTERN BINDING	Molecular function	45	37	http://www.broadinstitute.org/gsea/msigdb/cards/PATTERN_BINDING	0000	0000	no responding	0
GO SERINE TYPE ENDOPEPTIDASE ACTIVITY	Molecular function	41	37	http://www.broadinstitute.org/gsea/msigdb/cards/SERINE_TYPE_ENDOPEPTIDASE_ACTIVITY	0000	0000	no responding	1
GO REGULATION OF CYTOKINE BIOSYNTHETIC PROCESS	Biological process	38	36	http://www.broadinstitute.org/gsea/msigdb/cards/REGULATION_OF_CYTOKINE_BIOSYNTHETIC_PROCESS	0000	0000	no responding	3
GO VOLTAGE GATED POTASSIUM CHANNEL ACTIVITY	Molecular function	36	36	http://www.broadinstitute.org/gsea/msigdb/cards/VOLTAGE_GATED_POTASSIUM_CHANNEL_ACTIVITY	0000	0000	no responding	1
GO PROTEIN OLIGOMERIZATION	Biological process	40	35	http://www.broadinstitute.org/gsea/msigdb/cards/PROTEIN_OLIGOMERIZATION	0000	0000	no responding	4
GO TRANSFORMING GROWTH FACTOR BETA RECEPTOR SIGNALING PATHWAY	Biological process	36	35	http://www.broadinstitute.org/gsea/msigdb/cards/TRANSFORMING_GROWTH_FACTOR_BETA_RECEPTOR_SIGNALING_PATHWAY	0000	0000	no responding	1
GO REGULATION OF LYMPHOCYTE ACTIVATION	Biological process	35	35	http://www.broadinstitute.org/gsea/msigdb/cards/REGULATION_OF_LYMPHOCYTE_ACTIVATION	0000	0000	no responding	1
GO TRANSFERASE ACTIVITY TRANSFERRING ONE CARBON GROUPS	Molecular function	37	35	http://www.broadinstitute.org/gsea/msigdb/cards/TRANSFERASE_ACTIVITY_TRANSFERRING_ONE_CARBON_GROUPS	0000	0000	no responding	7
GO LIPID CATABOLIC PROCESS	Biological process	38	34	http://www.broadinstitute.org/gsea/msigdb/cards/LIPID_CATABOLIC_PROCESS	0000	0000	no responding	0
GO SULFUR METABOLIC PROCESS	Biological process	37	34	http://www.broadinstitute.org/gsea/msigdb/cards/SULFUR_METABOLIC_PROCESS	0000	0000	no responding	1
GO REGULATION OF CELL ADHESION	Biological process	37	34	http://www.broadinstitute.org/gsea/msigdb/cards/REGULATION_OF_CELL_ADHESION	0000	0000	no responding	6
GO NEGATIVE REGULATION OF TRANSFERASE ACTIVITY	Biological process	35	34	http://www.broadinstitute.org/gsea/msigdb/cards/NEGATIVE_REGULATION_OF_TRANSFERASE_ACTIVITY	0000	0000	no responding	5
GO OXIDOREDUCTASE ACTIVITY GO 0016705	Molecular function	38	34	http://www.broadinstitute.org/gsea/msigdb/cards/OXIDOREDUCTASE_ACTIVITY_GO_0016705	0000	0000	no responding	0
GO APICAL JUNCTION COMPLEX	Cellular component	34	33	http://www.broadinstitute.org/gsea/msigdb/cards/APICAL_JUNCTION_COMPLEX	0000	0000	no responding	0
GO APICOLATERAL PLASMA MEMBRANE	Cellular component	34	33	http://www.broadinstitute.org/gsea/msigdb/cards/APICOLATERAL_PLASMA_MEMBRANE	0000	0000	no responding	0
GO CELLULAR COMPONENT DISASSEMBLY	Biological process	33	32	http://www.broadinstitute.org/gsea/msigdb/cards/CELLULAR_COMPONENT_DISASSEMBLY	0000	0000	no responding	5
GO RESPONSE TO HORMONE STIMULUS	Biological process	33	32	http://www.broadinstitute.org/gsea/msigdb/cards/RESPONSE_TO_HORMONE_STIMULUS	0000	0000	no responding	4
GO SUGAR BINDING	Molecular function	34	32	http://www.broadinstitute.org/gsea/msigdb/cards/SUGAR_BINDING	0000	0000	no responding	0
GO CALCIUM CHANNEL ACTIVITY	Molecular function	33	32	http://www.broadinstitute.org/gsea/msigdb/cards/CALCIUM_CHANNEL_ACTIVITY	0000	0000	no responding	0
GO GTPASE BINDING	Molecular function	34	32	http://www.broadinstitute.org/gsea/msigdb/cards/GTPASE_BINDING	0000	0000	no responding	1
GO CLATHRIN COATED VESICLE	Cellular component	37	31	http://www.broadinstitute.org/gsea/msigdb/cards/CLATHRIN_COATED_VESICLE	0000	0000	no responding	2
GO RESPONSE TO EXTRACELLULAR STIMULUS	Biological process	33	31	http://www.broadinstitute.org/gsea/msigdb/cards/RESPONSE_TO_EXTRACELLULAR_STIMULUS	0000	0000	no responding	2
GO CELLULAR PROTEIN COMPLEX ASSEMBLY	Biological process	33	31	http://www.broadinstitute.org/gsea/msigdb/cards/CELLULAR_PROTEIN_COMPLEX_ASSEMBLY	0000	0000	no responding	0
GO CELLULAR LIPID CATABOLIC PROCESS	Biological process	35	31	http://www.broadinstitute.org/gsea/msigdb/cards/CELLULAR_LIPID_CATABOLIC_PROCESS	0000	0000	no responding	0
GO SKELETAL MUSCLE DEVELOPMENT	Biological process	31	31	http://www.broadinstitute.org/gsea/msigdb/cards/SKELETAL_MUSCLE_DEVELOPMENT	0000	0000	no responding	3
GO SYMPORTER ACTIVITY	Molecular function	31	31	http://www.broadinstitute.org/gsea/msigdb/cards/SYMPORTER_ACTIVITY	0000	0000	no responding	0
GO POLYSACCHARIDE BINDING	Molecular function	36	31	http://www.broadinstitute.org/gsea/msigdb/cards/POLYSACCHARIDE_BINDING	0000	0000	no responding	0
GO SMALL GTPASE BINDING	Molecular function	33	31	http://www.broadinstitute.org/gsea/msigdb/cards/SMALL_GTPASE_BINDING	0000	0000	no responding	1
GO TIGHT JUNCTION	Cellular component	31	30	http://www.broadinstitute.org/gsea/msigdb/cards/TIGHT_JUNCTION	0000	0000	no responding	0
GO DNA DAMAGE RESPONSESIGNAL TRANSDUCTION	Biological process	35	30	http://www.broadinstitute.org/gsea/msigdb/cards/DNA_DAMAGE_RESPONSESIGNAL_TRANSDUCTION	0000	0000	no responding	6
GO INTEGRIN BINDING	Molecular function	30	30	http://www.broadinstitute.org/gsea/msigdb/cards/INTEGRIN_BINDING	0000	0000	no responding	1
GO TISSUE REMODELING	Biological process	30	29	http://www.broadinstitute.org/gsea/msigdb/cards/TISSUE_REMODELING	0000	0000	no responding	2
GO HUMORAL IMMUNE RESPONSE	Biological process	32	29	http://www.broadinstitute.org/gsea/msigdb/cards/HUMORAL_IMMUNE_RESPONSE	0000	0000	no responding	3
GO HORMONE METABOLIC PROCESS	Biological process	32	29	http://www.broadinstitute.org/gsea/msigdb/cards/HORMONE_METABOLIC_PROCESS	0000	0000	no responding	0
GO AMINO ACID TRANSMEMBRANE TRANSPORTER ACTIVITY	Molecular function	29	29	http://www.broadinstitute.org/gsea/msigdb/cards/AMINO_ACID_TRANSMEMBRANE_TRANSPORTER_ACTIVITY	0000	0000	no responding	0
GO TRANSLATION FACTOR ACTIVITY NUCLEIC ACID BINDING	Molecular function	39	29	http://www.broadinstitute.org/gsea/msigdb/cards/TRANSLATION_FACTOR_ACTIVITY_NUCLEIC_ACID_BINDING	0000	0000	no responding	1
GO TRANSFERASE ACTIVITY TRANSFERRING SULFUR CONTAINING GROUPS	Molecular function	32	29	http://www.broadinstitute.org/gsea/msigdb/cards/TRANSFERASE_ACTIVITY_TRANSFERRING_SULFUR_CONTAINING_GROUPS	0000	0000	no responding	0
GO GLYCOSAMINOGLYCAN BINDING	Molecular function	34	29	http://www.broadinstitute.org/gsea/msigdb/cards/GLYCOSAMINOGLYCAN_BINDING	0000	0000	no responding	0
GO LIPID TRANSPORT	Biological process	28	28	http://www.broadinstitute.org/gsea/msigdb/cards/LIPID_TRANSPORT	0000	0000	no responding	0
GO REGULATION OF T CELL ACTIVATION	Biological process	28	28	http://www.broadinstitute.org/gsea/msigdb/cards/REGULATION_OF_T_CELL_ACTIVATION	0000	0000	no responding	1
GO BONE REMODELING	Biological process	29	28	http://www.broadinstitute.org/gsea/msigdb/cards/BONE_REMODELING	0000	0000	no responding	2
GO PEPTIDYL TYROSINE MODIFICATION	Biological process	29	28	http://www.broadinstitute.org/gsea/msigdb/cards/PEPTIDYL_TYROSINE_MODIFICATION	0000	0000	no responding	5
GO RESPONSE TO ORGANIC SUBSTANCE	Biological process	30	28	http://www.broadinstitute.org/gsea/msigdb/cards/RESPONSE_TO_ORGANIC_SUBSTANCE	0000	0000	no responding	2
GO GLUCOSE METABOLIC PROCESS	Biological process	28	27	http://www.broadinstitute.org/gsea/msigdb/cards/GLUCOSE_METABOLIC_PROCESS	0000	0000	no responding	0
GO INDUCTION OF APOPTOSIS BY EXTRACELLULAR SIGNALS	Biological process	27	27	http://www.broadinstitute.org/gsea/msigdb/cards/INDUCTION_OF_APOPTOSIS_BY_EXTRACELLULAR_SIGNALS	0000	0000	no responding	1
GO GENERATION OF A SIGNAL INVOLVED IN CELL CELL SIGNALING	Biological process	29	27	http://www.broadinstitute.org/gsea/msigdb/cards/GENERATION_OF_A_SIGNAL_INVOLVED_IN_CELL_CELL_SIGNALING	0000	0000	no responding	0
GO G1 S TRANSITION OF MITOTIC CELL CYCLE	Biological process	27	27	http://www.broadinstitute.org/gsea/msigdb/cards/G1_S_TRANSITION_OF_MITOTIC_CELL_CYCLE	0000	0000	no responding	3
GO LIPID TRANSPORTER ACTIVITY	Molecular function	28	27	http://www.broadinstitute.org/gsea/msigdb/cards/LIPID_TRANSPORTER_ACTIVITY	0000	0000	no responding	0
GO RUFFLE	Cellular component	31	26	http://www.broadinstitute.org/gsea/msigdb/cards/RUFFLE	0000	0000	no responding	3
GO VESICLE MEMBRANE	Cellular component	30	26	http://www.broadinstitute.org/gsea/msigdb/cards/VESICLE_MEMBRANE	0000	0000	no responding	1
GO AMINO ACID TRANSPORT	Biological process	26	26	http://www.broadinstitute.org/gsea/msigdb/cards/AMINO_ACID_TRANSPORT	0000	0000	no responding	0
GO REGULATION OF CELL MIGRATION	Biological process	28	26	http://www.broadinstitute.org/gsea/msigdb/cards/REGULATION_OF_CELL_MIGRATION	0000	0000	no responding	4
GO NUCLEAR ORGANIZATION AND BIOGENESIS	Biological process	30	26	http://www.broadinstitute.org/gsea/msigdb/cards/NUCLEAR_ORGANIZATION_AND_BIOGENESIS	0000	0000	no responding	4
GO POSITIVE REGULATION OF CASPASE ACTIVITY	Biological process	30	26	http://www.broadinstitute.org/gsea/msigdb/cards/POSITIVE_REGULATION_OF_CASPASE_ACTIVITY	0000	0000	no responding	5
GO NEGATIVE REGULATION OF CELLULAR COMPONENT ORGANIZATION AND BIOGENESIS	Biological process	29	26	http://www.broadinstitute.org/gsea/msigdb/cards/NEGATIVE_REGULATION_OF_CELLULAR_COMPONENT_ORGANIZATION_AND_BIOGENESIS	0000	0000	no responding	4
GO NEGATIVE REGULATION OF BIOSYNTHETIC PROCESS	Biological process	30	26	http://www.broadinstitute.org/gsea/msigdb/cards/NEGATIVE_REGULATION_OF_BIOSYNTHETIC_PROCESS	0000	0000	no responding	3
GO PHOSPHATASE REGULATOR ACTIVITY	Molecular function	26	26	http://www.broadinstitute.org/gsea/msigdb/cards/PHOSPHATASE_REGULATOR_ACTIVITY	0000	0000	no responding	2
GO NEGATIVE REGULATION OF CELLULAR BIOSYNTHETIC PROCESS	Biological process	29	25	http://www.broadinstitute.org/gsea/msigdb/cards/NEGATIVE_REGULATION_OF_CELLULAR_BIOSYNTHETIC_PROCESS	0000	0000	no responding	3
GO REGULATION OF PROTEIN AMINO ACID PHOSPHORYLATION	Biological process	30	25	http://www.broadinstitute.org/gsea/msigdb/cards/REGULATION_OF_PROTEIN_AMINO_ACID_PHOSPHORYLATION	0000	0000	no responding	6
GO LYMPHOCYTE DIFFERENTIATION	Biological process	26	25	http://www.broadinstitute.org/gsea/msigdb/cards/LYMPHOCYTE_DIFFERENTIATION	0000	0000	no responding	3
GO SECONDARY METABOLIC PROCESS	Biological process	26	25	http://www.broadinstitute.org/gsea/msigdb/cards/SECONDARY_METABOLIC_PROCESS	0000	0000	no responding	1
GO G PROTEIN SIGNALING ADENYLATE CYCLASE ACTIVATING PATHWAY	Biological process	25	25	http://www.broadinstitute.org/gsea/msigdb/cards/G_PROTEIN_SIGNALING_ADENYLATE_CYCLASE_ACTIVATING_PATHWAY	0000	0000	no responding	1
GO HETEROCYCLE METABOLIC PROCESS	Biological process	27	25	http://www.broadinstitute.org/gsea/msigdb/cards/HETEROCYCLE_METABOLIC_PROCESS	0000	0000	no responding	1
GO NITROGEN COMPOUND BIOSYNTHETIC PROCESS	Biological process	26	25	http://www.broadinstitute.org/gsea/msigdb/cards/NITROGEN_COMPOUND_BIOSYNTHETIC_PROCESS	0000	0000	no responding	2
GO RESPONSE TO HYPOXIA	Biological process	28	25	http://www.broadinstitute.org/gsea/msigdb/cards/RESPONSE_TO_HYPOXIA	0000	0000	no responding	4
GO SULFOTRANSFERASE ACTIVITY	Molecular function	28	25	http://www.broadinstitute.org/gsea/msigdb/cards/SULFOTRANSFERASE_ACTIVITY	0000	0000	no responding	0
GO KINASE INHIBITOR ACTIVITY	Molecular function	25	25	http://www.broadinstitute.org/gsea/msigdb/cards/KINASE_INHIBITOR_ACTIVITY	0000	0000	no responding	3
GO SERINE TYPE ENDOPEPTIDASE INHIBITOR ACTIVITY	Molecular function	25	25	http://www.broadinstitute.org/gsea/msigdb/cards/SERINE_TYPE_ENDOPEPTIDASE_INHIBITOR_ACTIVITY	0000	0000	no responding	0
GO CYTOPLASMIC VESICLE MEMBRANE	Cellular component	28	24	http://www.broadinstitute.org/gsea/msigdb/cards/CYTOPLASMIC_VESICLE_MEMBRANE	0000	0000	no responding	1
GO CYTOPLASMIC VESICLE PART	Cellular component	28	24	http://www.broadinstitute.org/gsea/msigdb/cards/CYTOPLASMIC_VESICLE_PART	0000	0000	no responding	1
GO POSITIVE REGULATION OF BINDING	Biological process	28	24	http://www.broadinstitute.org/gsea/msigdb/cards/POSITIVE_REGULATION_OF_BINDING	0000	0000	no responding	4
GO POSITIVE REGULATION OF CYTOKINE BIOSYNTHETIC PROCESS	Biological process	25	24	http://www.broadinstitute.org/gsea/msigdb/cards/POSITIVE_REGULATION_OF_CYTOKINE_BIOSYNTHETIC_PROCESS	0000	0000	no responding	2
GO TRANSCRIPTION INITIATION	Biological process	35	24	http://www.broadinstitute.org/gsea/msigdb/cards/TRANSCRIPTION_INITIATION	0000	0000	no responding	2
GO REGULATION OF ANGIOGENESIS	Biological process	26	24	http://www.broadinstitute.org/gsea/msigdb/cards/REGULATION_OF_ANGIOGENESIS	0000	0000	no responding	4
GO REGULATION OF HEART CONTRACTION	Biological process	25	24	http://www.broadinstitute.org/gsea/msigdb/cards/REGULATION_OF_HEART_CONTRACTION	0000	0000	no responding	0
GO POSITIVE REGULATION OF LYMPHOCYTE ACTIVATION	Biological process	24	24	http://www.broadinstitute.org/gsea/msigdb/cards/POSITIVE_REGULATION_OF_LYMPHOCYTE_ACTIVATION	0000	0000	no responding	1
GO POSITIVE REGULATION OF DNA BINDING	Biological process	26	24	http://www.broadinstitute.org/gsea/msigdb/cards/POSITIVE_REGULATION_OF_DNA_BINDING	0000	0000	no responding	4
GO CASPASE ACTIVATION	Biological process	26	24	http://www.broadinstitute.org/gsea/msigdb/cards/CASPASE_ACTIVATION	0000	0000	no responding	4
GO PROTEIN KINASE INHIBITOR ACTIVITY	Molecular function	24	24	http://www.broadinstitute.org/gsea/msigdb/cards/PROTEIN_KINASE_INHIBITOR_ACTIVITY	0000	0000	no responding	3
GO AUXILIARY TRANSPORT PROTEIN ACTIVITY	Molecular function	26	24	http://www.broadinstitute.org/gsea/msigdb/cards/AUXILIARY_TRANSPORT_PROTEIN_ACTIVITY	0000	0000	no responding	0
GO GENERAL RNA POLYMERASE II TRANSCRIPTION FACTOR ACTIVITY	Molecular function	32	24	http://www.broadinstitute.org/gsea/msigdb/cards/GENERAL_RNA_POLYMERASE_II_TRANSCRIPTION_FACTOR_ACTIVITY	0000	0000	no responding	3
GO CYTOSOLIC PART	Cellular component	23	23	http://www.broadinstitute.org/gsea/msigdb/cards/CYTOSOLIC_PART	0000	0000	no responding	3
GO CELL CORTEX PART	Cellular component	24	23	http://www.broadinstitute.org/gsea/msigdb/cards/CELL_CORTEX_PART	0000	0000	no responding	3
GO GOLGI ASSOCIATED VESICLE	Cellular component	29	23	http://www.broadinstitute.org/gsea/msigdb/cards/GOLGI_ASSOCIATED_VESICLE	0000	0000	no responding	1
GO REGULATION OF G PROTEIN COUPLED RECEPTOR PROTEIN SIGNALING PATHWAY	Biological process	23	23	http://www.broadinstitute.org/gsea/msigdb/cards/REGULATION_OF_G_PROTEIN_COUPLED_RECEPTOR_PROTEIN_SIGNALING_PATHWAY	0000	0000	no responding	0
GO AMINO ACID DERIVATIVE METABOLIC PROCESS	Biological process	24	23	http://www.broadinstitute.org/gsea/msigdb/cards/AMINO_ACID_DERIVATIVE_METABOLIC_PROCESS	0000	0000	no responding	0
GO PROTEIN SECRETION	Biological process	32	23	http://www.broadinstitute.org/gsea/msigdb/cards/PROTEIN_SECRETION	0000	0000	no responding	0
GO ORGANELLE LOCALIZATION	Biological process	25	23	http://www.broadinstitute.org/gsea/msigdb/cards/ORGANELLE_LOCALIZATION	0000	0000	no responding	2
GO RAS GTPASE BINDING	Molecular function	25	23	http://www.broadinstitute.org/gsea/msigdb/cards/RAS_GTPASE_BINDING	0000	0000	no responding	1
GO NEUROPEPTIDE BINDING	Molecular function	23	23	http://www.broadinstitute.org/gsea/msigdb/cards/NEUROPEPTIDE_BINDING	0000	0000	no responding	0
GO ANTIGEN BINDING	Molecular function	28	23	http://www.broadinstitute.org/gsea/msigdb/cards/ANTIGEN_BINDING	0000	0000	no responding	2
GO PROTEIN SERINE THREONINE PHOSPHATASE ACTIVITY	Molecular function	24	23	http://www.broadinstitute.org/gsea/msigdb/cards/PROTEIN_SERINE_THREONINE_PHOSPHATASE_ACTIVITY	0000	0000	no responding	2
GO OXIDOREDUCTASE ACTIVITY ACTING ON THE CH CH GROUP OF DONORS	Molecular function	23	23	http://www.broadinstitute.org/gsea/msigdb/cards/OXIDOREDUCTASE_ACTIVITY_ACTING_ON_THE_CH_CH_GROUP_OF_DONORS	0000	0000	no responding	1
GO ACTIN FILAMENT BINDING	Molecular function	25	23	http://www.broadinstitute.org/gsea/msigdb/cards/ACTIN_FILAMENT_BINDING	0000	0000	no responding	3
GO LAMELLIPODIUM	Cellular component	25	22	http://www.broadinstitute.org/gsea/msigdb/cards/LAMELLIPODIUM	0000	0000	no responding	1
GO EXTRINSIC TO MEMBRANE	Cellular component	25	22	http://www.broadinstitute.org/gsea/msigdb/cards/EXTRINSIC_TO_MEMBRANE	0000	0000	no responding	2
GO AXON GUIDANCE	Biological process	22	22	http://www.broadinstitute.org/gsea/msigdb/cards/AXON_GUIDANCE	0000	0000	no responding	0
GO MESODERM DEVELOPMENT	Biological process	22	22	http://www.broadinstitute.org/gsea/msigdb/cards/MESODERM_DEVELOPMENT	0000	0000	no responding	3
GO REGULATION OF NEUROTRANSMITTER LEVELS	Biological process	24	22	http://www.broadinstitute.org/gsea/msigdb/cards/REGULATION_OF_NEUROTRANSMITTER_LEVELS	0000	0000	no responding	0
GO POSITIVE REGULATION OF TRANSCRIPTION FACTOR ACTIVITY	Biological process	24	22	http://www.broadinstitute.org/gsea/msigdb/cards/POSITIVE_REGULATION_OF_TRANSCRIPTION_FACTOR_ACTIVITY	0000	0000	no responding	4
GO RNA CATABOLIC PROCESS	Biological process	23	22	http://www.broadinstitute.org/gsea/msigdb/cards/RNA_CATABOLIC_PROCESS	0000	0000	no responding	0
GO INDUCTION OF APOPTOSIS BY INTRACELLULAR SIGNALS	Biological process	24	22	http://www.broadinstitute.org/gsea/msigdb/cards/INDUCTION_OF_APOPTOSIS_BY_INTRACELLULAR_SIGNALS	0000	0000	no responding	6
GO DI TRI VALENT INORGANIC CATION TRANSMEMBRANE TRANSPORTER ACTIVITY	Molecular function	22	22	http://www.broadinstitute.org/gsea/msigdb/cards/DI___TRI_VALENT_INORGANIC_CATION_TRANSMEMBRANE_TRANSPORTER_ACTIVITY	0000	0000	no responding	0
GO DNA HELICASE ACTIVITY	Molecular function	25	22	http://www.broadinstitute.org/gsea/msigdb/cards/DNA_HELICASE_ACTIVITY	0000	0000	no responding	5
GO ATP DEPENDENT HELICASE ACTIVITY	Molecular function	27	22	http://www.broadinstitute.org/gsea/msigdb/cards/ATP_DEPENDENT_HELICASE_ACTIVITY	0000	0000	no responding	0
GO S ADENOSYLMETHIONINE DEPENDENT METHYLTRANSFERASE ACTIVITY	Molecular function	23	22	http://www.broadinstitute.org/gsea/msigdb/cards/S_ADENOSYLMETHIONINE_DEPENDENT_METHYLTRANSFERASE_ACTIVITY	0000	0000	no responding	4
GO ATPASE ACTIVITY COUPLED TO TRANSMEMBRANE MOVEMENT OF IONS	Molecular function	24	22	http://www.broadinstitute.org/gsea/msigdb/cards/ATPASE_ACTIVITY_COUPLED_TO_TRANSMEMBRANE_MOVEMENT_OF_IONS	0000	0000	no responding	0
GO CHANNEL REGULATOR ACTIVITY	Molecular function	24	22	http://www.broadinstitute.org/gsea/msigdb/cards/CHANNEL_REGULATOR_ACTIVITY	0000	0000	no responding	0
GO ADHERENS JUNCTION	Cellular component	23	21	http://www.broadinstitute.org/gsea/msigdb/cards/ADHERENS_JUNCTION	0000	0000	no responding	1
GO POSITIVE REGULATION OF CELL DIFFERENTIATION	Biological process	25	21	http://www.broadinstitute.org/gsea/msigdb/cards/POSITIVE_REGULATION_OF_CELL_DIFFERENTIATION	0000	0000	no responding	3
GO POSITIVE REGULATION OF TRANSPORT	Biological process	23	21	http://www.broadinstitute.org/gsea/msigdb/cards/POSITIVE_REGULATION_OF_TRANSPORT	0000	0000	no responding	3
GO ACTIN POLYMERIZATION AND OR DEPOLYMERIZATION	Biological process	23	21	http://www.broadinstitute.org/gsea/msigdb/cards/ACTIN_POLYMERIZATION_AND_OR_DEPOLYMERIZATION	0000	0000	no responding	1
GO CALCIUM INDEPENDENT CELL CELL ADHESION	Biological process	22	21	http://www.broadinstitute.org/gsea/msigdb/cards/CALCIUM_INDEPENDENT_CELL_CELL_ADHESION	0000	0000	no responding	0
GO POSITIVE REGULATION OF T CELL ACTIVATION	Biological process	21	21	http://www.broadinstitute.org/gsea/msigdb/cards/POSITIVE_REGULATION_OF_T_CELL_ACTIVATION	0000	0000	no responding	1
GO REGULATION OF BLOOD PRESSURE	Biological process	22	21	http://www.broadinstitute.org/gsea/msigdb/cards/REGULATION_OF_BLOOD_PRESSURE	0000	0000	no responding	0
GO COFACTOR BIOSYNTHETIC PROCESS	Biological process	21	21	http://www.broadinstitute.org/gsea/msigdb/cards/COFACTOR_BIOSYNTHETIC_PROCESS	0000	0000	no responding	0
GO MRNA BINDING	Molecular function	23	21	http://www.broadinstitute.org/gsea/msigdb/cards/MRNA_BINDING	0000	0000	no responding	0
GO HEPARIN BINDING	Molecular function	23	21	http://www.broadinstitute.org/gsea/msigdb/cards/HEPARIN_BINDING	0000	0000	no responding	0
GO COFACTOR BINDING	Molecular function	22	21	http://www.broadinstitute.org/gsea/msigdb/cards/COFACTOR_BINDING	0000	0000	no responding	0
GO HORMONE RECEPTOR BINDING	Molecular function	29	21	http://www.broadinstitute.org/gsea/msigdb/cards/HORMONE_RECEPTOR_BINDING	0000	0000	no responding	5
GO MAINTENANCE OF LOCALIZATION	Biological process	22	20	http://www.broadinstitute.org/gsea/msigdb/cards/MAINTENANCE_OF_LOCALIZATION	0000	0000	no responding	1
GO PROTEIN HOMOOLIGOMERIZATION	Biological process	22	20	http://www.broadinstitute.org/gsea/msigdb/cards/PROTEIN_HOMOOLIGOMERIZATION	0000	0000	no responding	2
GO REGULATION OF JNK ACTIVITY	Biological process	20	20	http://www.broadinstitute.org/gsea/msigdb/cards/REGULATION_OF_JNK_ACTIVITY	0000	0000	no responding	1
GO DETECTION OF EXTERNAL STIMULUS	Biological process	23	20	http://www.broadinstitute.org/gsea/msigdb/cards/DETECTION_OF_EXTERNAL_STIMULUS	0000	0000	no responding	0
GO RESPONSE TO DRUG	Biological process	22	20	http://www.broadinstitute.org/gsea/msigdb/cards/RESPONSE_TO_DRUG	0000	0000	no responding	2
GO NUCLEAR HORMONE RECEPTOR BINDING	Molecular function	28	20	http://www.broadinstitute.org/gsea/msigdb/cards/NUCLEAR_HORMONE_RECEPTOR_BINDING	0000	0000	no responding	5
GO MICROTUBULE ORGANIZING CENTER PART	Cellular component	19	19	http://www.broadinstitute.org/gsea/msigdb/cards/MICROTUBULE_ORGANIZING_CENTER_PART	0000	0000	no responding	2
GO CORTICAL CYTOSKELETON	Cellular component	20	19	http://www.broadinstitute.org/gsea/msigdb/cards/CORTICAL_CYTOSKELETON	0000	0000	no responding	2
GO NEURON PROJECTION	Cellular component	21	19	http://www.broadinstitute.org/gsea/msigdb/cards/NEURON_PROJECTION	0000	0000	no responding	1
GO DETECTION OF ABIOTIC STIMULUS	Biological process	19	19	http://www.broadinstitute.org/gsea/msigdb/cards/DETECTION_OF_ABIOTIC_STIMULUS	0000	0000	no responding	0
GO CARBOHYDRATE TRANSPORT	Biological process	19	19	http://www.broadinstitute.org/gsea/msigdb/cards/CARBOHYDRATE_TRANSPORT	0000	0000	no responding	0
GO REGULATION OF NUCLEOCYTOPLASMIC TRANSPORT	Biological process	22	19	http://www.broadinstitute.org/gsea/msigdb/cards/REGULATION_OF_NUCLEOCYTOPLASMIC_TRANSPORT	0000	0000	no responding	3
GO SODIUM ION TRANSPORT	Biological process	22	19	http://www.broadinstitute.org/gsea/msigdb/cards/SODIUM_ION_TRANSPORT	0000	0000	no responding	0
GO ESTABLISHMENT AND OR MAINTENANCE OF CELL POLARITY	Biological process	19	19	http://www.broadinstitute.org/gsea/msigdb/cards/ESTABLISHMENT_AND_OR_MAINTENANCE_OF_CELL_POLARITY	0000	0000	no responding	0
GO NEGATIVE REGULATION OF TRANSLATION	Biological process	23	19	http://www.broadinstitute.org/gsea/msigdb/cards/NEGATIVE_REGULATION_OF_TRANSLATION	0000	0000	no responding	2
GO ADENYLATE CYCLASE ACTIVATION	Biological process	19	19	http://www.broadinstitute.org/gsea/msigdb/cards/ADENYLATE_CYCLASE_ACTIVATION	0000	0000	no responding	1
GO ATPASE ACTIVITY COUPLED TO TRANSMEMBRANE MOVEMENT OF IONS PHOSPHORYLATIVE MECHANISM	Molecular function	20	19	http://www.broadinstitute.org/gsea/msigdb/cards/ATPASE_ACTIVITY_COUPLED_TO_TRANSMEMBRANE_MOVEMENT_OF_IONS_PHOSPHORYLATIVE_MECHANISM	0000	0000	no responding	0
GO HYDROLASE ACTIVITY ACTING ON CARBON NITROGEN NOT PEPTIDEBONDSIN LINEAR AMIDES	Molecular function	21	19	http://www.broadinstitute.org/gsea/msigdb/cards/HYDROLASE_ACTIVITY_ACTING_ON_CARBON_NITROGEN_NOT_PEPTIDEBONDSIN_LINEAR_AMIDES	0000	0000	no responding	0
GO REGULATION OF DEFENSE RESPONSE	Biological process	20	18	http://www.broadinstitute.org/gsea/msigdb/cards/REGULATION_OF_DEFENSE_RESPONSE	0000	0000	no responding	0
GO T CELL PROLIFERATION	Biological process	19	18	http://www.broadinstitute.org/gsea/msigdb/cards/T_CELL_PROLIFERATION	0000	0000	no responding	1
GO FATTY ACID OXIDATION	Biological process	18	18	http://www.broadinstitute.org/gsea/msigdb/cards/FATTY_ACID_OXIDATION	0000	0000	no responding	0
GO TRNA METABOLIC PROCESS	Biological process	19	18	http://www.broadinstitute.org/gsea/msigdb/cards/TRNA_METABOLIC_PROCESS	0000	0000	no responding	0
GO NUCLEOTIDE BIOSYNTHETIC PROCESS	Biological process	20	18	http://www.broadinstitute.org/gsea/msigdb/cards/NUCLEOTIDE_BIOSYNTHETIC_PROCESS	0000	0000	no responding	0
GO PROTEIN AMINO ACID O LINKED GLYCOSYLATION	Biological process	18	18	http://www.broadinstitute.org/gsea/msigdb/cards/PROTEIN_AMINO_ACID_O_LINKED_GLYCOSYLATION	0000	0000	no responding	0
GO TRANSCRIPTION INITIATION FROM RNA POLYMERASE II PROMOTER	Biological process	29	18	http://www.broadinstitute.org/gsea/msigdb/cards/TRANSCRIPTION_INITIATION_FROM_RNA_POLYMERASE_II_PROMOTER	0000	0000	no responding	2
GO POSITIVE REGULATION OF JNK ACTIVITY	Biological process	18	18	http://www.broadinstitute.org/gsea/msigdb/cards/POSITIVE_REGULATION_OF_JNK_ACTIVITY	0000	0000	no responding	1
GO PIGMENT METABOLIC PROCESS	Biological process	18	18	http://www.broadinstitute.org/gsea/msigdb/cards/PIGMENT_METABOLIC_PROCESS	0000	0000	no responding	1
GO INORGANIC ANION TRANSMEMBRANE TRANSPORTER ACTIVITY	Molecular function	19	18	http://www.broadinstitute.org/gsea/msigdb/cards/INORGANIC_ANION_TRANSMEMBRANE_TRANSPORTER_ACTIVITY	0000	0000	no responding	1
GO RAS GUANYL NUCLEOTIDE EXCHANGE FACTOR ACTIVITY	Molecular function	19	18	http://www.broadinstitute.org/gsea/msigdb/cards/RAS_GUANYL_NUCLEOTIDE_EXCHANGE_FACTOR_ACTIVITY	0000	0000	no responding	0
GO VOLTAGE GATED CALCIUM CHANNEL ACTIVITY	Molecular function	18	18	http://www.broadinstitute.org/gsea/msigdb/cards/VOLTAGE_GATED_CALCIUM_CHANNEL_ACTIVITY	0000	0000	no responding	0
GO STEROID BINDING	Molecular function	18	18	http://www.broadinstitute.org/gsea/msigdb/cards/STEROID_BINDING	0000	0000	no responding	0
GO CHROMATIN REMODELING COMPLEX	Cellular component	17	17	http://www.broadinstitute.org/gsea/msigdb/cards/CHROMATIN_REMODELING_COMPLEX	0000	0000	no responding	2
GO INSULIN RECEPTOR SIGNALING PATHWAY	Biological process	19	17	http://www.broadinstitute.org/gsea/msigdb/cards/INSULIN_RECEPTOR_SIGNALING_PATHWAY	0000	0000	no responding	3
GO GLUTAMATE SIGNALING PATHWAY	Biological process	17	17	http://www.broadinstitute.org/gsea/msigdb/cards/GLUTAMATE_SIGNALING_PATHWAY	0000	0000	no responding	0
GO DEVELOPMENTAL MATURATION	Biological process	18	17	http://www.broadinstitute.org/gsea/msigdb/cards/DEVELOPMENTAL_MATURATION	0000	0000	no responding	1
GO MYOBLAST DIFFERENTIATION	Biological process	17	17	http://www.broadinstitute.org/gsea/msigdb/cards/MYOBLAST_DIFFERENTIATION	0000	0000	no responding	2
GO TUBE DEVELOPMENT	Biological process	18	17	http://www.broadinstitute.org/gsea/msigdb/cards/TUBE_DEVELOPMENT	0000	0000	no responding	1
GO NEGATIVE REGULATION OF CELL ADHESION	Biological process	18	17	http://www.broadinstitute.org/gsea/msigdb/cards/NEGATIVE_REGULATION_OF_CELL_ADHESION	0000	0000	no responding	3
GO VITAMIN METABOLIC PROCESS	Biological process	17	17	http://www.broadinstitute.org/gsea/msigdb/cards/VITAMIN_METABOLIC_PROCESS	0000	0000	no responding	0
GO REGULATION OF ACTION POTENTIAL	Biological process	17	17	http://www.broadinstitute.org/gsea/msigdb/cards/REGULATION_OF_ACTION_POTENTIAL	0000	0000	no responding	1
GO CELLULAR RESPONSE TO STIMULUS	Biological process	19	17	http://www.broadinstitute.org/gsea/msigdb/cards/CELLULAR_RESPONSE_TO_STIMULUS	0000	0000	no responding	1
GO INTERACTION WITH HOST	Biological process	17	17	http://www.broadinstitute.org/gsea/msigdb/cards/INTERACTION_WITH_HOST	0000	0000	no responding	0
GO REGULATION OF MITOTIC CELL CYCLE	Biological process	23	17	http://www.broadinstitute.org/gsea/msigdb/cards/REGULATION_OF_MITOTIC_CELL_CYCLE	0000	0000	no responding	1
GO ICOSANOID METABOLIC PROCESS	Biological process	17	17	http://www.broadinstitute.org/gsea/msigdb/cards/ICOSANOID_METABOLIC_PROCESS	0000	0000	no responding	1
GO NEGATIVE REGULATION OF MAP KINASE ACTIVITY	Biological process	17	17	http://www.broadinstitute.org/gsea/msigdb/cards/NEGATIVE_REGULATION_OF_MAP_KINASE_ACTIVITY	0000	0000	no responding	1
GO PIGMENT BIOSYNTHETIC PROCESS	Biological process	17	17	http://www.broadinstitute.org/gsea/msigdb/cards/PIGMENT_BIOSYNTHETIC_PROCESS	0000	0000	no responding	1
GO ANION CHANNEL ACTIVITY	Molecular function	20	17	http://www.broadinstitute.org/gsea/msigdb/cards/ANION_CHANNEL_ACTIVITY	0000	0000	no responding	0
GO CHLORIDE CHANNEL ACTIVITY	Molecular function	19	17	http://www.broadinstitute.org/gsea/msigdb/cards/CHLORIDE_CHANNEL_ACTIVITY	0000	0000	no responding	0
GO HISTONE DEACETYLASE COMPLEX	Cellular component	20	16	http://www.broadinstitute.org/gsea/msigdb/cards/HISTONE_DEACETYLASE_COMPLEX	0000	0000	no responding	0
GO CELL MATRIX JUNCTION	Cellular component	18	16	http://www.broadinstitute.org/gsea/msigdb/cards/CELL_MATRIX_JUNCTION	0000	0000	no responding	0
GO DENDRITE	Cellular component	16	16	http://www.broadinstitute.org/gsea/msigdb/cards/DENDRITE	0000	0000	no responding	1
GO BIOGENIC AMINE METABOLIC PROCESS	Biological process	17	16	http://www.broadinstitute.org/gsea/msigdb/cards/BIOGENIC_AMINE_METABOLIC_PROCESS	0000	0000	no responding	0
GO FEMALE GAMETE GENERATION	Biological process	17	16	http://www.broadinstitute.org/gsea/msigdb/cards/FEMALE_GAMETE_GENERATION	0000	0000	no responding	1
GO ACTIVATION OF JNK ACTIVITY	Biological process	16	16	http://www.broadinstitute.org/gsea/msigdb/cards/ACTIVATION_OF_JNK_ACTIVITY	0000	0000	no responding	1
GO SULFUR COMPOUND BIOSYNTHETIC PROCESS	Biological process	18	16	http://www.broadinstitute.org/gsea/msigdb/cards/SULFUR_COMPOUND_BIOSYNTHETIC_PROCESS	0000	0000	no responding	1
GO ACTIVATION OF NF KAPPAB TRANSCRIPTION FACTOR	Biological process	18	16	http://www.broadinstitute.org/gsea/msigdb/cards/ACTIVATION_OF_NF_KAPPAB_TRANSCRIPTION_FACTOR	0000	0000	no responding	3
GO CELL RECOGNITION	Biological process	19	16	http://www.broadinstitute.org/gsea/msigdb/cards/CELL_RECOGNITION	0000	0000	no responding	0
GO ESTABLISHMENT OF ORGANELLE LOCALIZATION	Biological process	18	16	http://www.broadinstitute.org/gsea/msigdb/cards/ESTABLISHMENT_OF_ORGANELLE_LOCALIZATION	0000	0000	no responding	0
GO RESPONSE TO TEMPERATURE STIMULUS	Biological process	16	16	http://www.broadinstitute.org/gsea/msigdb/cards/RESPONSE_TO_TEMPERATURE_STIMULUS	0000	0000	no responding	1
GO LIPID HOMEOSTASIS	Biological process	16	16	http://www.broadinstitute.org/gsea/msigdb/cards/LIPID_HOMEOSTASIS	0000	0000	no responding	0
GO SENSORY PERCEPTION OF CHEMICAL STIMULUS	Biological process	20	16	http://www.broadinstitute.org/gsea/msigdb/cards/SENSORY_PERCEPTION_OF_CHEMICAL_STIMULUS	0000	0000	no responding	1
GO REGULATION OF ENDOCYTOSIS	Biological process	16	16	http://www.broadinstitute.org/gsea/msigdb/cards/REGULATION_OF_ENDOCYTOSIS	0000	0000	no responding	3
GO REGULATION OF T CELL PROLIFERATION	Biological process	16	16	http://www.broadinstitute.org/gsea/msigdb/cards/REGULATION_OF_T_CELL_PROLIFERATION	0000	0000	no responding	0
GO REGULATION OF PROTEIN STABILITY	Biological process	19	16	http://www.broadinstitute.org/gsea/msigdb/cards/REGULATION_OF_PROTEIN_STABILITY	0000	0000	no responding	2
GO SODIUM CHANNEL ACTIVITY	Molecular function	17	16	http://www.broadinstitute.org/gsea/msigdb/cards/SODIUM_CHANNEL_ACTIVITY	0000	0000	no responding	0
GO ANION CATION SYMPORTER ACTIVITY	Molecular function	16	16	http://www.broadinstitute.org/gsea/msigdb/cards/ANION_CATION_SYMPORTER_ACTIVITY	0000	0000	no responding	0
GO THIOLESTER HYDROLASE ACTIVITY	Molecular function	16	16	http://www.broadinstitute.org/gsea/msigdb/cards/THIOLESTER_HYDROLASE_ACTIVITY	0000	0000	no responding	0
GO HYDROLASE ACTIVITY ACTING ON CARBON NITROGEN NOT PEPTIDEBONDSIN CYCLIC AMIDINES	Molecular function	16	16	http://www.broadinstitute.org/gsea/msigdb/cards/HYDROLASE_ACTIVITY_ACTING_ON_CARBON_NITROGEN_NOT_PEPTIDEBONDSIN_CYCLIC_AMIDINES	0000	0000	no responding	1
GO DOUBLE STRANDED RNA BINDING	Molecular function	17	16	http://www.broadinstitute.org/gsea/msigdb/cards/DOUBLE_STRANDED_RNA_BINDING	0000	0000	no responding	1
GO ACETYLGLUCOSAMINYLTRANSFERASE ACTIVITY	Molecular function	16	16	http://www.broadinstitute.org/gsea/msigdb/cards/ACETYLGLUCOSAMINYLTRANSFERASE_ACTIVITY	0000	0000	no responding	1
GO ACETYLCHOLINE BINDING	Molecular function	17	16	http://www.broadinstitute.org/gsea/msigdb/cards/ACETYLCHOLINE_BINDING	0000	0000	no responding	0
GO MYOSIN COMPLEX	Cellular component	16	15	http://www.broadinstitute.org/gsea/msigdb/cards/MYOSIN_COMPLEX	0000	0000	no responding	0
GO ENERGY RESERVE METABOLIC PROCESS	Biological process	15	15	http://www.broadinstitute.org/gsea/msigdb/cards/ENERGY_RESERVE_METABOLIC_PROCESS	0000	0000	no responding	0
GO T CELL DIFFERENTIATION	Biological process	15	15	http://www.broadinstitute.org/gsea/msigdb/cards/T_CELL_DIFFERENTIATION	0000	0000	no responding	2
GO DETECTION OF CHEMICAL STIMULUS	Biological process	18	15	http://www.broadinstitute.org/gsea/msigdb/cards/DETECTION_OF_CHEMICAL_STIMULUS	0000	0000	no responding	0
GO AMINE BIOSYNTHETIC PROCESS	Biological process	15	15	http://www.broadinstitute.org/gsea/msigdb/cards/AMINE_BIOSYNTHETIC_PROCESS	0000	0000	no responding	0
GO ER TO GOLGI VESICLE MEDIATED TRANSPORT	Biological process	18	15	http://www.broadinstitute.org/gsea/msigdb/cards/ER_TO_GOLGI_VESICLE_MEDIATED_TRANSPORT	0000	0000	no responding	0
GO MACROMOLECULAR COMPLEX DISASSEMBLY	Biological process	15	15	http://www.broadinstitute.org/gsea/msigdb/cards/MACROMOLECULAR_COMPLEX_DISASSEMBLY	0000	0000	no responding	3
GO POLYSACCHARIDE METABOLIC PROCESS	Biological process	18	15	http://www.broadinstitute.org/gsea/msigdb/cards/POLYSACCHARIDE_METABOLIC_PROCESS	0000	0000	no responding	0
GO POSITIVE REGULATION OF SECRETION	Biological process	20	15	http://www.broadinstitute.org/gsea/msigdb/cards/POSITIVE_REGULATION_OF_SECRETION	0000	0000	no responding	0
GO CARBOHYDRATE KINASE ACTIVITY	Molecular function	15	15	http://www.broadinstitute.org/gsea/msigdb/cards/CARBOHYDRATE_KINASE_ACTIVITY	0000	0000	no responding	0
GO COENZYME BINDING	Molecular function	16	15	http://www.broadinstitute.org/gsea/msigdb/cards/COENZYME_BINDING	0000	0000	no responding	0
KEGG APOPTOSIS	Cellular Processes	88	82	http://www.broadinstitute.org/gsea/msigdb/cards/KEGG_APOPTOSIS	0000	0000	no responding	11
KEGG TGF BETA SIGNALING PATHWAY	Environmental Information Processing	86	82	http://www.broadinstitute.org/gsea/msigdb/cards/KEGG_TGF_BETA_SIGNALING_PATHWAY	0000	0000	no responding	5
KEGG HYPERTROPHIC CARDIOMYOPATHY HCM	Human Diseases	85	82	http://www.broadinstitute.org/gsea/msigdb/cards/KEGG_HYPERTROPHIC_CARDIOMYOPATHY_HCM	0000	0000	no responding	2
KEGG MELANOMA	Human Diseases	71	71	http://www.broadinstitute.org/gsea/msigdb/cards/KEGG_MELANOMA	0000	0000	no responding	27
KEGG PPAR SIGNALING PATHWAY	Organismal Systems	69	66	http://www.broadinstitute.org/gsea/msigdb/cards/KEGG_PPAR_SIGNALING_PATHWAY	0000	0000	no responding	2
KEGG LONG TERM DEPRESSION	Organismal Systems	70	66	http://www.broadinstitute.org/gsea/msigdb/cards/KEGG_LONG_TERM_DEPRESSION	0000	0000	no responding	11
KEGG NON SMALL CELL LUNG CANCER	Human Diseases	54	52	http://www.broadinstitute.org/gsea/msigdb/cards/KEGG_NON_SMALL_CELL_LUNG_CANCER	0000	0000	no responding	20
KEGG ARACHIDONIC ACID METABOLISM	Metabolism	58	51	http://www.broadinstitute.org/gsea/msigdb/cards/KEGG_ARACHIDONIC_ACID_METABOLISM	0000	0000	no responding	0
KEGG CYTOSOLIC DNA SENSING PATHWAY	Organismal Systems	56	51	http://www.broadinstitute.org/gsea/msigdb/cards/KEGG_CYTOSOLIC_DNA_SENSING_PATHWAY	0000	0000	no responding	0
KEGG AMYOTROPHIC LATERAL SCLEROSIS ALS	Human Diseases	53	49	http://www.broadinstitute.org/gsea/msigdb/cards/KEGG_AMYOTROPHIC_LATERAL_SCLEROSIS_ALS	0000	0000	no responding	4
KEGG INOSITOL PHOSPHATE METABOLISM	Metabolism	54	46	http://www.broadinstitute.org/gsea/msigdb/cards/KEGG_INOSITOL_PHOSPHATE_METABOLISM	0000	0000	no responding	2
KEGG VASOPRESSIN REGULATED WATER REABSORPTION	Organismal Systems	44	44	http://www.broadinstitute.org/gsea/msigdb/cards/KEGG_VASOPRESSIN_REGULATED_WATER_REABSORPTION	0000	0000	no responding	4
KEGG GLYCEROLIPID METABOLISM	Metabolism	49	43	http://www.broadinstitute.org/gsea/msigdb/cards/KEGG_GLYCEROLIPID_METABOLISM	0000	0000	no responding	1
KEGG PRION DISEASES	Human Diseases	35	35	http://www.broadinstitute.org/gsea/msigdb/cards/KEGG_PRION_DISEASES	0000	0000	no responding	3
KEGG ALANINE ASPARTATE AND GLUTAMATE METABOLISM	Metabolism	32	32	http://www.broadinstitute.org/gsea/msigdb/cards/KEGG_ALANINE_ASPARTATE_AND_GLUTAMATE_METABOLISM	0000	0000	no responding	0
KEGG GLYCINE SERINE AND THREONINE METABOLISM	Metabolism	31	31	http://www.broadinstitute.org/gsea/msigdb/cards/KEGG_GLYCINE_SERINE_AND_THREONINE_METABOLISM	0000	0000	no responding	0
KEGG CYSTEINE AND METHIONINE METABOLISM	Metabolism	34	31	http://www.broadinstitute.org/gsea/msigdb/cards/KEGG_CYSTEINE_AND_METHIONINE_METABOLISM	0000	0000	no responding	1
KEGG PORPHYRIN AND CHLOROPHYLL METABOLISM	Metabolism	41	31	http://www.broadinstitute.org/gsea/msigdb/cards/KEGG_PORPHYRIN_AND_CHLOROPHYLL_METABOLISM	0000	0000	no responding	0
KEGG THYROID CANCER	Human Diseases	29	29	http://www.broadinstitute.org/gsea/msigdb/cards/KEGG_THYROID_CANCER	0000	0000	no responding	21
KEGG GLYCOSPHINGOLIPID BIOSYNTHESIS LACTO AND NEOLACTO SERIES	Metabolism	26	26	http://www.broadinstitute.org/gsea/msigdb/cards/KEGG_GLYCOSPHINGOLIPID_BIOSYNTHESIS_LACTO_AND_NEOLACTO_SERIES	0000	0000	no responding	0
KEGG PROXIMAL TUBULE BICARBONATE RECLAMATION	Organismal Systems	23	23	http://www.broadinstitute.org/gsea/msigdb/cards/KEGG_PROXIMAL_TUBULE_BICARBONATE_RECLAMATION	0000	0000	no responding	0
KEGG PROTEIN EXPORT	Genetic Information Processing	24	20	http://www.broadinstitute.org/gsea/msigdb/cards/KEGG_PROTEIN_EXPORT	0000	0000	no responding	0
KEGG BIOSYNTHESIS OF UNSATURATED FATTY ACIDS	Metabolism	22	19	http://www.broadinstitute.org/gsea/msigdb/cards/KEGG_BIOSYNTHESIS_OF_UNSATURATED_FATTY_ACIDS	0000	0000	no responding	0
KEGG MATURITY ONSET DIABETES OF THE YOUNG	Human Diseases	25	19	http://www.broadinstitute.org/gsea/msigdb/cards/KEGG_MATURITY_ONSET_DIABETES_OF_THE_YOUNG	0000	0000	no responding	0
KEGG PHENYLALANINE METABOLISM	Metabolism	18	18	http://www.broadinstitute.org/gsea/msigdb/cards/KEGG_PHENYLALANINE_METABOLISM	0000	0000	no responding	0
KEGG PRIMARY BILE ACID BIOSYNTHESIS	Metabolism	16	16	http://www.broadinstitute.org/gsea/msigdb/cards/KEGG_PRIMARY_BILE_ACID_BIOSYNTHESIS	0000	0000	no responding	0
KEGG RIBOFLAVIN METABOLISM	Metabolism	16	16	http://www.broadinstitute.org/gsea/msigdb/cards/KEGG_RIBOFLAVIN_METABOLISM	0000	0000	no responding	0
KEGG PANTOTHENATE AND COA BIOSYNTHESIS	Metabolism	16	16	http://www.broadinstitute.org/gsea/msigdb/cards/KEGG_PANTOTHENATE_AND_COA_BIOSYNTHESIS	0000	0000	no responding	0
KEGG RENIN ANGIOTENSIN SYSTEM	Organismal Systems	17	16	http://www.broadinstitute.org/gsea/msigdb/cards/KEGG_RENIN_ANGIOTENSIN_SYSTEM	0000	0000	no responding	0
KEGG GLYCOSAMINOGLYCAN BIOSYNTHESIS KERATAN SULFATE	Metabolism	15	15	http://www.broadinstitute.org/gsea/msigdb/cards/KEGG_GLYCOSAMINOGLYCAN_BIOSYNTHESIS_KERATAN_SULFATE	0000	0000	no responding	0
KEGG TERPENOID BACKBONE BIOSYNTHESIS	Metabolism	15	15	http://www.broadinstitute.org/gsea/msigdb/cards/KEGG_TERPENOID_BACKBONE_BIOSYNTHESIS	0000	0000	no responding	0
BIOCARTA CHREBP2 PATHWAY	Cell Signaling	42	42	http://www.broadinstitute.org/gsea/msigdb/cards/BIOCARTA_CHREBP2_PATHWAY	0000	0000	no responding	3
BIOCARTA IL2RB PATHWAY	Cell Signaling-Cytokines/Chemokines- Immunology	38	38	http://www.broadinstitute.org/gsea/msigdb/cards/BIOCARTA_IL2RB_PATHWAY	0000	0000	no responding	12
BIOCARTA DEATH PATHWAY	Apoptosis	33	32	http://www.broadinstitute.org/gsea/msigdb/cards/BIOCARTA_DEATH_PATHWAY	0000	0000	no responding	2
BIOCARTA FAS PATHWAY	Apoptosis - Cell Signaling – Immunology	30	30	http://www.broadinstitute.org/gsea/msigdb/cards/BIOCARTA_FAS_PATHWAY	0000	0000	no responding	4
BIOCARTA NO1 PATHWAY	Cell Activation	33	29	http://www.broadinstitute.org/gsea/msigdb/cards/BIOCARTA_NO1_PATHWAY	0000	0000	no responding	3
BIOCARTA GSK3 PATHWAY	Cell Signaling – Immunology	27	27	http://www.broadinstitute.org/gsea/msigdb/cards/BIOCARTA_GSK3_PATHWAY	0000	0000	no responding	8
BIOCARTA G1 PATHWAY	Cell Cycle Regulation	28	26	http://www.broadinstitute.org/gsea/msigdb/cards/BIOCARTA_G1_PATHWAY	0000	0000	no responding	9
BIOCARTA BAD PATHWAY	Apoptosis - Cell Signaling	26	26	http://www.broadinstitute.org/gsea/msigdb/cards/BIOCARTA_BAD_PATHWAY	0000	0000	no responding	6
BIOCARTA CSK PATHWAY	Cell Signaling – Immunology	24	23	http://www.broadinstitute.org/gsea/msigdb/cards/BIOCARTA_CSK_PATHWAY	0000	0000	no responding	6
BIOCARTA INTRINSIC PATHWAY	Metabolism	23	23	http://www.broadinstitute.org/gsea/msigdb/cards/BIOCARTA_INTRINSIC_PATHWAY	0000	0000	no responding	0
BIOCARTA CASPASE PATHWAY	Apoptosis	23	22	http://www.broadinstitute.org/gsea/msigdb/cards/BIOCARTA_CASPASE_PATHWAY	0000	0000	no responding	2
BIOCARTA CTCF PATHWAY	Developmental Biology – Expression	23	22	http://www.broadinstitute.org/gsea/msigdb/cards/BIOCARTA_CTCF_PATHWAY	0000	0000	no responding	9
BIOCARTA DC PATHWAY	Cytokines/Chemokines - Hematopoiesis – Immunology	22	22	http://www.broadinstitute.org/gsea/msigdb/cards/BIOCARTA_DC_PATHWAY	0000	0000	no responding	0
BIOCARTA PGC1A PATHWAY	Cell Signaling – Expression	26	22	http://www.broadinstitute.org/gsea/msigdb/cards/BIOCARTA_PGC1A_PATHWAY	0000	0000	no responding	0
BIOCARTA CHEMICAL PATHWAY	Apoptosis	22	21	http://www.broadinstitute.org/gsea/msigdb/cards/BIOCARTA_CHEMICAL_PATHWAY	0000	0000	no responding	4
BIOCARTA IL12 PATHWAY	Cell Signaling – Cytokines/Chemokines – Immunology	23	21	http://www.broadinstitute.org/gsea/msigdb/cards/BIOCARTA_IL12_PATHWAY	0000	0000	no responding	5
BIOCARTA TOB1 PATHWAY	Cell Activation – Immunology	21	20	http://www.broadinstitute.org/gsea/msigdb/cards/BIOCARTA_TOB1_PATHWAY	0000	0000	no responding	3
BIOCARTA CTLA4 PATHWAY	Cell Activation – Cell Signaling – Immunology	21	20	http://www.broadinstitute.org/gsea/msigdb/cards/BIOCARTA_CTLA4_PATHWAY	0000	0000	no responding	8
BIOCARTA AKT PATHWAY	Adhesion – Apoptosis	22	19	http://www.broadinstitute.org/gsea/msigdb/cards/BIOCARTA_AKT_PATHWAY	0000	0000	no responding	3
BIOCARTA SPPA PATHWAY	Cell Activation	22	19	http://www.broadinstitute.org/gsea/msigdb/cards/BIOCARTA_SPPA_PATHWAY	0000	0000	no responding	4
BIOCARTA TID PATHWAY	Cell Signaling	19	19	http://www.broadinstitute.org/gsea/msigdb/cards/BIOCARTA_TID_PATHWAY	0000	0000	no responding	4
BIOCARTA GCR PATHWAY	Cell Signaling	22	19	http://www.broadinstitute.org/gsea/msigdb/cards/BIOCARTA_GCR_PATHWAY	0000	0000	no responding	4
BIOCARTA IGF1MTOR PATHWAY	Cell Signaling	20	19	http://www.broadinstitute.org/gsea/msigdb/cards/BIOCARTA_IGF1MTOR_PATHWAY	0000	0000	no responding	4
BIOCARTA TH1TH2 PATHWAY	Cell Activation – Immunology	19	19	http://www.broadinstitute.org/gsea/msigdb/cards/BIOCARTA_TH1TH2_PATHWAY	0000	0000	no responding	1
BIOCARTA ETS PATHWAY	Developmental Biology-Expression	18	18	http://www.broadinstitute.org/gsea/msigdb/cards/BIOCARTA_ETS_PATHWAY	0000	0000	no responding	2
BIOCARTA NKCELLS PATHWAY	Immunology	20	18	http://www.broadinstitute.org/gsea/msigdb/cards/BIOCARTA_NKCELLS_PATHWAY	0000	0000	no responding	5
BIOCARTA MEF2D PATHWAY	Apoptosis-Cell Signaling-Expression	23	18	http://www.broadinstitute.org/gsea/msigdb/cards/BIOCARTA_MEF2D_PATHWAY	0000	0000	no responding	3
BIOCARTA STATHMIN PATHWAY	Cell Cycle Regulation	19	18	http://www.broadinstitute.org/gsea/msigdb/cards/BIOCARTA_STATHMIN_PATHWAY	0000	0000	no responding	1
BIOCARTA TEL PATHWAY	Cell Cycle Regulation	18	18	http://www.broadinstitute.org/gsea/msigdb/cards/BIOCARTA_TEL_PATHWAY	0000	0000	no responding	8
BIOCARTA TGFB PATHWAY	Cell Signaling-Cytokines/Chemokines	19	18	http://www.broadinstitute.org/gsea/msigdb/cards/BIOCARTA_TGFB_PATHWAY	0000	0000	no responding	5
BIOCARTA CALCINEURIN PATHWAY	Cell Signaling-Developmental Biology	21	17	http://www.broadinstitute.org/gsea/msigdb/cards/BIOCARTA_CALCINEURIN_PATHWAY	0000	0000	no responding	1
BIOCARTA IL10 PATHWAY	Cell Signaling-Cytokines/Chemokines-Immunology	17	17	http://www.broadinstitute.org/gsea/msigdb/cards/BIOCARTA_IL10_PATHWAY	0000	0000	no responding	2
BIOCARTA CK1 PATHWAY	Cell Signaling	17	17	http://www.broadinstitute.org/gsea/msigdb/cards/BIOCARTA_CK1_PATHWAY	0000	0000	no responding	1
BIOCARTA PML PATHWAY	Expression	17	17	http://www.broadinstitute.org/gsea/msigdb/cards/BIOCARTA_PML_PATHWAY	0000	0000	no responding	8
BIOCARTA ARF PATHWAY	Cell Signaling-Expression	17	17	http://www.broadinstitute.org/gsea/msigdb/cards/BIOCARTA_ARF_PATHWAY	0000	0000	no responding	9
BIOCARTA IL17 PATHWAY	Cell Signaling-Cytokines/Chemokines-Hematopoiesis-Immunology	17	16	http://www.broadinstitute.org/gsea/msigdb/cards/BIOCARTA_IL17_PATHWAY	0000	0000	no responding	2
BIOCARTA P53 PATHWAY	Apoptosis-Cell Cycle Regulation-Cell Signaling-Expression	16	16	http://www.broadinstitute.org/gsea/msigdb/cards/BIOCARTA_P53_PATHWAY	0000	0000	no responding	8
BIOCARTA NO2IL12 PATHWAY	Cell Activation-Cell Signaling-Cytokines/Chemokines-Immunology	17	15	http://www.broadinstitute.org/gsea/msigdb/cards/BIOCARTA_NO2IL12_PATHWAY	0000	0000	no responding	1
BIOCARTA CCR5 PATHWAY	Cell Signaling-Hematopoiesis-Immunology	20	15	http://www.broadinstitute.org/gsea/msigdb/cards/BIOCARTA_CCR5_PATHWAY	0000	0000	no responding	2
BIOCARTA ACH PATHWAY	Apoptosis-Cell Activation-Cell Signaling-Neuroscience	16	15	http://www.broadinstitute.org/gsea/msigdb/cards/BIOCARTA_ACH_PATHWAY	0000	0000	no responding	4
BIOCARTA HSP27 PATHWAY	Apoptosis-Cell Activation	15	15	http://www.broadinstitute.org/gsea/msigdb/cards/BIOCARTA_HSP27_PATHWAY	0000	0000	no responding	2

## Sheet: Sheet2
4	0001	1110	divergent responding	1				419.38		182.36
4	0001	1110	divergent responding	1				0.062688		4.9726
4	0001	1110	divergent responding	1				-0.542		7.5362
4	0011	1100	divergent responding	1				-0.3354		40.207
4	0001	1110	divergent responding	1				-0.023519		1.959
4	0001	1110	divergent responding	1				-1.5505		14.875
4	0001	1110	divergent responding	1				-0.066231		1.2612
4	0100	1011	divergent responding	1				-2.9046		201.15
4	0001	1110	divergent responding	1				-0.22528		13.078
4	0010	1101	divergent responding	1				-0.95728		3.9199
3	0100	0011	divergent responding	0				39.099		26.132
3	1001	0010	divergent responding	-1				52.804		59.667
3	1001	0010	divergent responding	-1				-0.012442		2.9921
3	1101	0110	divergent responding	-1				92.093		17.603
3	0001	0110	divergent responding	0				-0.07927		2.9768
3	1011	0110	divergent responding	-1				-0.092464		48.672
3	1110	0011	divergent responding	-1				-12.796		94.46
3	1001	0010	divergent responding	-1				1.8612		17.433
3	1001	0010	divergent responding	-1				111.19		3.1077
3	1001	1110	divergent responding	0				105.67		4.601
3	1011	1100	divergent responding	0				-1.1642		38.738
3	0110	0001	divergent responding	0				16.931		125.6
3	0001	0110	divergent responding	0				21.87		155.22
3	1001	1110	divergent responding	0				9.1806		19.94
3	0001	1010	divergent responding	1				-2.2031		3.6996
3	0110	1011	divergent responding	1				-0.00010739		0.096016
3	0110	0001	divergent responding	0				0.13489		2.4984
3	0001	1100	divergent responding	1				1.906		6.7217
3	0011	1000	divergent responding	1				-13.295		187.24
3	1100	0010	divergent responding	-1				0.46584		0.7995
3	0001	1010	divergent responding	1				6.4298		4.0639
3	0110	1000	divergent responding	1				28.505		26.675
3	1010	0001	divergent responding	-1				-0.1243		0.091855
3	0101	1011	divergent responding	1				-0.072861		0.20984
3	1011	0101	divergent responding	-1				138.43		93.966
3	1010	0100	divergent responding	-1				-0.1164		2.5827
3	1010	0100	divergent responding	-1				5.7037		28.077
3	0001	1100	divergent responding	1				-22.295		3.8699
3	0001	1100	divergent responding	1				1.8118		24.834
3	1000	0011	divergent responding	-1				1.5955		27.512
3	0010	1100	divergent responding	1				0.15792		0.82294
3	0010	1100	divergent responding	1				-1.6377		56.626
3	0101	1000	divergent responding	1				-6.0519		3.4041
3	1000	0011	divergent responding	-1				-0.023603		0.23617
3	0001	0110	divergent responding	0				-4.8053		11.764
3	0001	0110	divergent responding	0				-22.081		1.3197
3	1001	0111	divergent responding	-1				-1.5377		2.3824
3	1001	0010	divergent responding	-1				33.858		32.944
3	1100	0001	divergent responding	-1				-0.35388		0.32667
3	0101	0010	divergent responding	0				89.562		120.71
3	0101	0010	divergent responding	0				-8.8596		108.12
3	0100	0011	divergent responding	0				-0.0077766		3.4203
3	1000	0101	divergent responding	-1				-0.0042748		4.0131
3	0011	1000	divergent responding	1				-0.0082917		0.85374
3	0010	1100	divergent responding	1				0.48434		9.1174
3	1001	0100	divergent responding	-1				-12.372		-0.0012478
2	1001	0011	divergent responding	-1				3.6762		10.233
2	0100	0001	divergent responding	0				0.042542		-1.2255
2	1000	0010	divergent responding	-1				4.0321		6.7369
2	1011	1000	divergent responding	0				0.016255		8.7311
2	0001	1011	divergent responding	1				-0.15053		-0.00029003
2	0001	0010	divergent responding	0				0.0027191		-1.0532
2	1000	0010	divergent responding	-1				0.2682		-1.348
2	1101	0111	divergent responding	-1				18.568		46.8
2	0001	0100	divergent responding	0				-0.16879		53.14
2	1000	0010	divergent responding	-1				55.272		84.013
2	1000	0001	divergent responding	-1				7.3921		0.69832
2	0001	0100	divergent responding	0				0.41286		-0.34906
2	1000	1110	divergent responding	0				-0.66629		25.223
2	1000	0100	divergent responding	-1				59.255		78.37
2	0001	1000	divergent responding	1				-0.63312		2.7044
2	0010	1110	divergent responding	1				-0.51161		0.0046807
2	1110	0010	divergent responding	-1				4.5414		1.7164
2	1000	0100	divergent responding	-1				-0.61141		26.822
2	0001	0010	divergent responding	0				-0.29461		1.5161
2	0010	1110	divergent responding	1				-0.31748		2.4099
2	1000	0001	divergent responding	-1				2.9971		5.9233
2	1000	0001	divergent responding	-1				0.52808		1.9701
2	1000	0100	divergent responding	-1				0.15948		0.00059413
2	1000	0001	divergent responding	-1				60.422		52.372
2	0111	1101	divergent responding	1				0.71949		28.125
2	0010	1110	divergent responding	1				0.22069		10.085
2	1010	0110	divergent responding	-1				-0.68368		21.926
2	1000	1011	divergent responding	0				1.5134		0.19694
2	0001	1000	divergent responding	1				-0.085865		-0.061898
2	1110	0010	divergent responding	-1				-0.25964		9.8936
2	0100	1110	divergent responding	1				1.8089		4.835
2	1000	0001	divergent responding	-1				0.16026		19.99
2	1000	0010	divergent responding	-1				-3.3405		1.6851
2	0010	1110	divergent responding	1				1.8357		18.601
2	0100	0010	divergent responding	0				-0.51354		17.242
2	1000	0100	divergent responding	-1				-0.26385		21.201
2	1000	1110	divergent responding	0				-0.20964		13.75
2	1000	0010	divergent responding	-1				0.8627		4.4952
2	1000	0010	divergent responding	-1				-0.37831		1.8925
2	0001	1101	divergent responding	1				-0.20421		5.2726
2	0010	0100	divergent responding	0				-0.088682		4.1267
2	0010	1110	divergent responding	1				0.70668		10.405
2	0001	0100	divergent responding	0				1.6227		2.9561
2	0010	1110	divergent responding	1				2.0454		-0.26162
2	1000	0010	divergent responding	-1				2.0454		-0.26162
2	1000	0010	divergent responding	-1				0.022493		1.6547
2	1000	0010	divergent responding	-1				0.97177		-0.1849
2	1110	1000	divergent responding	0				-0.51508		2.209
2	1000	0010	divergent responding	-1				-1.4826		-0.67796
2	1000	0100	divergent responding	-1				-1.6565		39.667
2	0001	1000	divergent responding	1				-0.29416		-0.26831
2	0001	1000	divergent responding	1				-0.99199		1.5271
2	0001	0010	divergent responding	0				-2.7542		26.198
2	0010	0001	divergent responding	0				-0.084439		0.92755
2	1010	0110	divergent responding	-1				9.4582		4.9617
2	1011	1110	divergent responding	0				3.0048		18.488
2	1000	0010	divergent responding	-1				-0.03297		0.65128
2	1000	0001	divergent responding	-1				0.16777		0.3121
2	0001	0010	divergent responding	0				0.69249		34.478
2	1000	0100	divergent responding	-1				0.23542		20.245
2	1000	0001	divergent responding	-1				-0.50038		9.7947
2	0100	1110	divergent responding	1				-0.19532		24.135
2	0100	0001	divergent responding	0				0.040053		1.2627
2	0100	0001	divergent responding	0				0.26847		5.8587
2	0100	0001	divergent responding	0				1.8354		3.5633
2	0001	0010	divergent responding	0				-0.074386		0.039062
2	0010	0001	divergent responding	0				0.93882		17.727
2	1000	0001	divergent responding	-1				-0.20773		0.50537
2	0010	1110	divergent responding	1				0.0028893		16.542
2	0100	0111	divergent responding	0				-0.57378		5.6807
2	0010	0100	divergent responding	0				-0.062367		1.0609
2	1000	0010	divergent responding	-1				-0.1934		0.64742
2	0100	0010	divergent responding	0				-0.0030947		0.00054294
2	1000	0010	divergent responding	-1				-0.72339		9.9492
2	1000	0100	divergent responding	-1				4.2475		1.7723
2	0010	0001	divergent responding	0				1.5658		6.4333
2	0010	1000	divergent responding	1				13.137		0.026539
2	1000	0010	divergent responding	-1				0.15015		8.8739
2	1000	0010	divergent responding	-1				2.7108		12.244
2	0010	0100	divergent responding	0				-1.7036		1.243
2	0001	1000	divergent responding	1				-2.9339		3.8516
2	0001	0111	divergent responding	0				7.5242		12.823
2	0100	0111	divergent responding	0				0.65774		1.589
2	0001	0100	divergent responding	0				-0.24335		-0.038512
2	0001	1000	divergent responding	1				-0.21631		1.9168
2	0010	0001	divergent responding	0				-0.32201		6.2639
2	1000	0100	divergent responding	-1				0.70084		0.00046674
2	0001	0010	divergent responding	0				0.073071		0.35476
2	0010	1000	divergent responding	1				-0.23962		0.10387
2	0001	1000	divergent responding	1				1.9055		1.6799
2	1000	0100	divergent responding	-1				-1.3537		16.061
2	1000	0100	divergent responding	-1				36.219		4.8229
2	0001	1000	divergent responding	1				-3.654		3.4698
2	1000	0100	divergent responding	-1				5.3634		2.9336
2	0010	1000	divergent responding	1				-0.26547		10.969
2	1000	0100	divergent responding	-1				4.1834		29.231
2	0111	0010	divergent responding	0				8.4552		5.3456
2	1011	1000	divergent responding	0				0.27581		6.2618
2	0100	1000	divergent responding	1				-0.18642		-0.52287
2	1110	1000	divergent responding	0				-0.52625		35.994
2	0100	0010	divergent responding	0				24.423		3.2153
2	0100	0111	divergent responding	0				6.9802		5.0948
2	1110	0010	divergent responding	-1				5.837		23.543
2	0010	0001	divergent responding	0				-0.34282		0.079713
2	0001	1000	divergent responding	1				-0.023799		-0.99843
2	0001	1000	divergent responding	1				-1.3785		-0.048121
2	0100	1000	divergent responding	1				1.0175		28.378
2	0001	1000	divergent responding	1				-0.50547		33.695
2	0100	0010	divergent responding	0				-0.32011		0.37633
2	0001	1011	divergent responding	1				-0.87353		94.798
2	1000	0010	divergent responding	-1				0.098642		-0.37164
2	0010	0100	divergent responding	0				-0.61181		26.32
2	0010	0100	divergent responding	0				6.8915		6.3079
2	1000	1110	divergent responding	0				0.00022717		6.1633
2	0100	1000	divergent responding	1				4.0687		4.832
2	0001	0100	divergent responding	0				0.040409		0.28307
2	0001	0111	divergent responding	0				-0.33641		33.735
2	0001	0010	divergent responding	0				0.0038717		1.8089
2	0010	1000	divergent responding	1				-0.0045673		9.2328
2	0100	0111	divergent responding	0				0.013455		7.4246
2	1000	0001	divergent responding	-1				0.00054974		2.5375
2	1000	0010	divergent responding	-1				-1.4407		3.5052
2	1000	0100	divergent responding	-1				-0.43702		0.31048
2	1011	0010	divergent responding	-1				0.97724		9.305
2	1011	0010	divergent responding	-1				0.0057998		2.7835
2	1110	0111	divergent responding	-1				-0.60703		0.0015352
2	0010	1000	divergent responding	1				27.433		4.1695
2	1000	0100	divergent responding	-1				0.31379		11.027
2	0010	1000	divergent responding	1				-0.9547		3.5742
2	1011	0111	divergent responding	-1				-0.096327		14.444
2	0001	0100	divergent responding	0				-0.94226		0.01522
1	0101	0111	divergent responding	0				2.7995		10.799
1	1010	0010	divergent responding	-1				0.91614		-0.070955
1	1010	1000	divergent responding	0				1.9804		0.0017994
1	1010	1000	divergent responding	0				0.54398		0.002666
1	1100	1101	divergent responding	0				-0.15667		-0.41395
1	0101	0111	divergent responding	0				0.42953		0.0080253
1	1010	1110	divergent responding	0				-0.05437		-0.53676
1	1000	1010	divergent responding	0				6.9641		0.8268
1	0011	0010	divergent responding	0				1.9843		0.40303
1	0001	0101	divergent responding	0				0.52657		0.056247
1	1001	0001	divergent responding	-1				-1.5139		0.075073
1	1000	1010	divergent responding	0				0.87343		14.908
1	0010	0011	divergent responding	0				-0.54408		4.2187
1	1010	0010	divergent responding	-1				-1.0134		2.4305
1	0101	0111	divergent responding	0				-0.54408		4.2187
1	1010	1000	divergent responding	0				-1.0134		2.4305
1	0011	0010	divergent responding	0				-0.22266		-0.22302
1	0110	0010	divergent responding	0				0.00028395		10.003
1	0110	0100	divergent responding	0				-0.0036789		8.5252
1	1100	1000	divergent responding	0				29.961		11.182
1	0011	0010	divergent responding	0				0.018456		-0.48352
1	0011	0010	divergent responding	0				12.194		2.7308
1	0110	0100	divergent responding	0				-0.89096		17.405
1	0100	0110	divergent responding	0				-0.10245		0.58242
1	0001	0101	divergent responding	0				0.076149		0.035876
1	0011	0001	divergent responding	0				0.52781		-0.061383
1	1000	1010	divergent responding	0				0.066028		18.781
1	0001	0101	divergent responding	0				-0.18787		0.69402
1	1010	1000	divergent responding	0				-0.18787		0.69402
1	0101	0100	divergent responding	0				2.0009		5.7656
1	0101	0001	divergent responding	0				0.00023734		-0.36877
1	0101	0111	divergent responding	0				12.847		5.8351
1	1000	1100	divergent responding	0				5.1406		0.44685
1	1100	1000	divergent responding	0				0.15047		-0.0087969
1	1011	1010	divergent responding	0				6.4336		-0.50231
1	0100	0110	divergent responding	0				-0.76008		-0.048499
1	0101	0111	divergent responding	0				0.9694		3.6291
1	1001	1000	divergent responding	0				-0.32287		8.2391
1	0010	0011	divergent responding	0				-0.015002		8.6782
1	0100	0101	divergent responding	0				-1.6107		-0.10466
1	0101	0001	divergent responding	0				-1.0561		1.0136
1	0100	1100	divergent responding	1				-0.80859		-0.12054
1	1001	1000	divergent responding	0				-1.0591		11.777
1	0011	0010	divergent responding	0				0.0012559		-0.29209
1	0010	1010	divergent responding	1				0.00086599		4.4811
1	0010	1010	divergent responding	1				-0.5949		-0.87425
1	1000	1100	divergent responding	0				0.1307		4.3409
1	1100	1000	divergent responding	0				-0.44127		-0.81231
1	0011	0010	divergent responding	0				-2.7802		-1.4916
1	0001	0011	divergent responding	0				-0.0032851		1.3983
1	1000	1100	divergent responding	0				-0.97068		-0.13085
1	1000	1100	divergent responding	0				0.37173		2.0744
1	1100	0100	divergent responding	-1				0.01415		0.27179
								0.47872		-0.11276
								0.51321		10.977
								0.51321		10.977
								0.13556		2.4385
								0.26885		4.2591
								-0.011373		11.629
								-1.0779		0.75627
								1.2214		3.3087
								-0.23516		17.12
								0.00092351		19.142
								-26.686		330.33
								9.0593		9.5773
								0.0058324		-1.2523
								-2.5637		0.26452
								0.76632		102.81
								-0.42467		-0.14057
								2.4326		1.859
								11.029		3.2942
								-9.5187		839.33
								3.6145		7.9096
								-0.5661		-0.078674
								3.3921		0.30781
								-0.076951		5.7329
								-0.11337		0.029063
								-0.44977		1.2419
								0.56632		0.68212
								-0.41264		0.54449
								3.9204		1.6568
								5.6373		2.9973
								-1.5582		38.838
								-0.10813		0.10715
								0.23327		0.22664
								-0.10592		8.0163
								1.7852		18.445
								-0.067694		0.63082
								16.629		5.1438
								-5.493		39.076
								-0.55168		24.988
								-0.16977		0.2501
								3.5075		28.293
								-0.066774		0.1802
								-1.2324		5.5073
								-0.27327		0.56781
								0.022348		9.8242
								-0.0056576		3.2633
								13.17		2.9328
								-0.64811		19.407
								0.12078		14.133
								0.17657		6.2824
								1.2693		10.628
								0.0022316		0.2121
								1.7319		14.827
								-3.2226		5.2849
								-0.81604		0.010497
								-0.0013323		0.57754
								9.8595		2.5719
								0.56237		0.42271
								0.19367		0.17935
								-0.54649		4.3555
								-1.7165		1.0593
								0.12968		-0.32691
								-0.11185		-0.02274
								-1.8864		2.15
								-1.2355		0.10502
								0.29003		18.963
								0.13127		8.9528
								-0.70779		3.4504
								0.00096841		1.2805
								1.7254		2.9954
								-1.0213		1.1416
								0.97823		0.68825
								0.020436		0.00067742
								-0.017039		2.9511
								-1.6427		1.4425
								-0.18244		4.4291
								-0.29279		0.017574
								-1.4049		1.9899
								-0.0064586		15.394
								0.026997		1.4488
								-0.45503		0.12105
								-0.28831		0.35236
								0.24294		30.261
								-0.48095		-0.013904
								0.039005		6.8942
								-0.44299		6.2259
								-0.01325		1.1136
								0.013495		-0.0038554
								0.0055665		-0.013118
								-0.012236		0.039004
								1.6496		-0.011406
								-0.73586		-0.1197
								-0.85866		10.468
								-1.5494		1.3131
								-1.8654		-1.1327
								0.10783		-0.63013
								-0.52733		0.25758
								-0.52548		0.18292
								-0.067853		-0.27344
								-1.2922		-2.51e-05
								-0.037025		1.2011
								-1.0922		-0.13145
								-0.87206		-0.18022
								0.70193		25.336
								0.017396		-1.6199
								2.4249		-0.50863
								0.43077		22.527
								-0.61784		0.46304
								-0.24919		0.94074
								-0.41175		-0.27159
								-0.18271		0.33526
								-1.6543		7.827
								-0.38387		-0.24534
								-0.48217		28.373
								-0.98793		0.14609
								-0.77318		-0.95299
								0.51741		3.9217
								-1.436		-0.00049215
								-0.34345		1.9553
								16.056		6.8525
								3.1846		0.070868
								314.25		1091
								39.824		621.38
								39.824		621.38
								32.702		17.217
								423.66		1387.7
								572.88		104.79
								136.31		107.37
								21.307		52.733
								21.307		52.733
								375.4		161.97
								142.18		39.543
								276.79		469.6
								113.31		65.299
								93.93		14.912
								116.07		20.348
								56.596		174.4
								77.404		148.9
								65.065		105.03
								112.56		190.59
								100.43		26.368
								75.186		135.72
								42.616		21.079
								144.86		72.879
								144.86		72.879
								6.1203		5.3629
								16.864		14.952
								13.904		0.89789
								11.695		21.607
								10.717		0.68451
								17.996		4.1637
								339.77		963.69
								16.198		15.706
								100.79		115.04
								790.8		1374
								471.44		821.29
								60.632		130.21
								69.918		40.439
								1.8758		21.134
								13.42		106.47
								447.4		62.79
								65.67		21.342
								242.05		94.323
								-0.11518		44.94
								0.023189		0.93345
								4.5807		23.511
								3.5817		-1.3865
								4.3011		32.027
								1.996		28.533
								4.428		85.375
								38.413		8.7371
								0.0056233		-0.0011703
								5.299		68.581
								0.65364		-0.4071
								0.18582		2.5307
								1.7242		44.444
								98.181		18.524
								98.181		18.524
								1.4576		1.9165
								58.458		7.332
								27.168		0.55487
								-0.017153		-0.013386
								6.1334		8.8804
								0.12371		20.269
								11.559		0.55439
								370.2		47.389
								39.824		1.2493
								42.131		0.18806
								-0.54058		8.6092
								-0.46356		27.708
								62.71		0.37987
								0.0055377		1.6905
								99.713		69.405
								2.8044		0.16057
								0.3811		27.822
								-0.48219		13.375
								3.1e-06		8.3551
								3.0708		0.17941
								-0.0018983		9.1352
								0.90106		2.522
								2.4319		13.803
								0.66763		-0.00052724
								2.0839		21.544
								6.9505		47.406
								4.0889		2.57
								3.9964		-0.048378
								-0.077733		-0.16604
								12.96		4.6891
								5.0715		1.0169
								-0.25357		-0.34052
								138.44		0.7448
								4.81		0.033673
								0.80077		-0.13493
								0.015608		0.080381
								-0.22278		-0.29336
								0.17122		1.4477
								1.3174		2.4944
								-0.72453		8.6063
								2.1391		-0.3183
								32.959		0.41986
								9.1568		1.8963
								-0.018536		0.12079
								1.1084		12.805
								-0.028775		2.9878
								0.0029288		-0.016631
								-0.1785		0.30031
								0.39215		3.4698
								0.11476		-0.059553
								-0.22703		1.2643
								2.5359		0.90022
								3.3		29.948
								1.5062		0.10666
								32.257		8.4591
								2.7399		2.8852
								-0.33528		0.013692
								5.3734		0.72349
								9.4688		1.2279
								0.73979		1.038
								-0.28962		0.75509
								39.879		5.703
								11.577		6.8292
								2.0324		4.0134
								1.3767		-0.0087761
								0.0016595		-0.09367
								4.5802		14.744
								33.031		12.958
								-0.90168		0.2242
								0.50359		-1.5445
								102.68		31.077
								0.82172		-0.36674
								16.342		22.818
								-0.33946		-0.22398
								41.524		6.8039
								120.9		25.031
								0.020891		0.03859
								-0.032711		0.40365
								0.33359		10.018
								46.571		10.222
								18.473		2.9572
								29.683		18.105
								3.2073		6.3377
								1.5337		0.68665
								0.22688		-0.7614
								24.026		0.271
								2.7659		-0.10915
								0.019695		-1.0772
								-0.12515		-0.66415
								-1.0158		-0.71984
								14.389		10.863
								-0.010389		0.011189
								0.55994		0.016333
								4.2376		6.3927
								82.367		17.936
								23.241		0.17818
								-0.098531		-0.88476
								-0.35252		0.068067
								-0.19388		-1.1084
								13.021		-0.46564
								2.8638		0.012723
								0.098186		3.7753
								21.864		-0.30947
								0.76435		-0.17668
								-0.014173		-1.6694
								0.11169		0.47936
								0.002098		-0.55598
								18.918		-0.061694
								0.18253		-0.13086
								-0.66598		-0.0080761
								1.8111		0.18488
								-2.5743		0.057571
								1.4059		2.428
								0.31113		6.9546
								1.9512		0.010002
								1.0899		3.3028
								1.3885		2.6054
								0.012843		0.77996
								33.976		0.93453
								8.0771		14.781
								-0.16064		-0.49437
								10.409		-0.67507
								0.23672		7.368
								-0.62223		20.349
								4.7127		-0.2587
								1.8212		0.021384
								-0.053958		-0.083421
								-0.086678		-0.21304
								0.061184		2.5017
								0.12464		-0.0076472
								0.77981		3.9459
								0.91924		0.76191
								0.47667		0.061696
								0.25479		-0.0032272
								1.064		-0.05264
								0.0062359		-1.1049
								-0.55447		-0.40375
								0.014714		0.023493
								-0.96966		-0.13589
								5.944		-0.0046858
								-0.092415		-0.020504
								33.278		7.4484
								-0.092415		-0.020504
								-0.092415		-0.020504
								0.70329		16.02
								0.081343		1.7217
								7.0259		-0.58526
								-0.91435		-0.5607
								5.7607		0.00010495
								17.642		9.1207
								-0.35517		-0.0611
								6.3124		1.7926
								4.197		12.81
								-0.0022212		2.9221
								4.8277		12.437
								-0.32531		-0.30651
								-0.030186		3.4368
								0.28162		-0.0016483
								0.34589		-0.022039
								4.0571		-0.11793
								1.3077		13.981
								1.4702		84.9
								-0.00058874		0.49143
								27.597		21.179
								-0.00013809		1.2518
								2.3331		29.435
								8.4507		5.6499
								25.052		3.8282
								11.265		7.4717
								-0.83587		2.4183
								0.65268		0.0002121
								10.516		5.297
								49.201		1.3468
								18.479		-0.47443
								29.191		23.035
								-1.8877		-0.69092
								1.7576		4.5401
								2.4676		0.24559
								-0.66699		11.726
								-0.82952		135.09
								12.494		52.969
								-0.0091227		4.4224
								11.057		41.253
								0.48568		11.666
								3.7575		18.088
								0.16612		33.373
								0.11909		32.591
								0.46209		23.519
								-0.39518		6.1031
								-0.02967		8.8707
								5.7299		32.706
								-0.089666		10.32
								26.13		140.11
								116.05		23.289
								26.35		160.39
								0.025179		4.8076
								5.3361		68.898
								22.252		1.858
								55.87		-1.0364
								10.767		1.1013
								18.024		71.195
								7.5016		0.12553
								12.334		50.842
								19.225		1.4045
								17.307		1.0594
								0.010709		-1.3805
								-0.066319		51.829
								5.4706		132.07
								-3.09		0.0046165
								0.90333		-1.3695
								-0.032869		-0.23989
								-0.26977		-0.16267
								3.739		1.0015
								24.096		1.1624
								1.2838		2.1381
								5.3462		6.3632
								-13.015		-1.1666
								3.0302		-0.1036
								-0.73163		-0.13426
								-0.79565		-0.48733
								2.1402		0.92129
								-1.4947		2.121
								-0.80382		-0.35821
								-11.468		-1.8047
								-2.7866		-0.55768
								-0.6762		1.478
								2.388		-0.0003032
								1.6412		-0.044699
								1.7271		5.742
								0.50818		0.62299
								93.18		84.057
								-19.313		-2.1159
								20.045		34.439
								-0.15744		0.010311
								0.098121		-0.50647
								-3.7426		-0.92897
								51.09		35.196
								0.055514		-0.42466
								-0.03671		0.33716
								0.050877		-1.3197
								0.015229		2.1279
								0.096481		-0.068847
								0.63366		-0.13059
								-0.22522		-2.3541
								-0.32621		8.6662
								-3.2746		1.1714
								5.0682		-1.1246
								0.74203		14.5
								0.45511		0.16707
								-0.24663		2.0952
								0.21337		-0.02645
								2040.7		1385.1
								-0.88715		0.5887
								6.075		0.040268
								1.0287		0.50698
								17.341		21.293
								-0.59928		0.31128
								-0.049872		2.791
								-4.7371		-1.1645
								-0.71369		0.059355
								0.31273		-0.032393
								-0.82221		-1.2347
								0.0032218		2.4817
								-1.0189		27.007
								-0.98433		1.3573
								-0.14907		0.94906
								-2.983		3.1075
								0.11252		-0.68145
								-4.8145		-2.0824
								4.0377		-0.003204
								0.10604		-1.313
								153.79		30.202
								0.85894		0.0036352
								6.3296		5.3848
								-0.07028		0.14476
								-4.5696		-4.0185
								-0.015029		-1.4485
								0.19136		-0.85864
								-1.871		0.51538
								4.7157		-0.47344
								83.196		27.688
								17.665		3.6055
								-1.2813		-0.48637
								6.4837		-0.87539
								-2.3504		-0.048266
								18.743		83.68
								-0.0011444		18.907
								0.3409		10.671
								0.4328		0.19834
								0.0039863		-0.034608
								-1.1587		0.094342
								0.30834		1.6696
								-0.06379		0.02782
								-5.3354		8.8291
								-1.3283		0.1115
								-1.3127		2.5364
								-0.47578		-0.15282
								-1.3342		4.0835
								-2.7258		-2.8065
								8.2258		6.6733
								-0.14646		-0.90815
								1.8735		1.0206
								0.30141		2.2307
								1.0017		19.834
								-0.63092		4.0352
								6.5567		1.2333
								0.9341		-1.0885
								-0.028665		-0.013689
								-0.00042392		7.1294
								0.57809		10.468
								-0.025652		-0.091621
								-1.7387		1.1646
								-0.47725		-1.4914
								0.31742		2.7642
								-1.5098		2.0931
								-1.1092		0.028905
								-9.23e-05		1.2991
								-2.9993		0.71928
								0.18972		11.495
								0.61131		9.9703
								-0.75806		2.5298
								1.7603		0.075223
								0.046738		-0.043736
								0.50216		-0.0026113
								-2.5841		0.21932
								-1.5259		-0.11623
								-0.029564		0.40203
								-6.4188		-1.8842
								2.3593		18.448
								4.1471		10.899
								-1.6368		-0.11318
								22.989		20.751
								-0.24477		0.093755
								-2.1114		3.0229
								1.3497		0.37601
								0.095703		-0.28412
								0.070499		8.8419
								0.87133		1.2475
								-0.2054		-1.3413
								-0.28008		17.293
								0.69509		1.5324
								0.15917		-0.052857
								-0.061299		2.5544
								-3.3703		0.010514
								-1.626		4.0767
								-3.1501		-2.3681
								0.026872		-1.2419
								0.073305		-0.19201
								-1.9748		1.3282
								8.1963		0.76921
								-0.13768		0.13315
								23.428		21.226
								-0.36821		0.21437
								-0.30867		-0.85985
								-0.45592		3.9931
								0.075038		8.4827
								0.075038		8.4827
								-0.32089		-1.1845
								0.050468		-0.44479
								-4.4248		0.21668
								-0.76936		-0.98076
								-0.99964		1.1375
								-0.25271		0.57584
								13.387		2.7498
								-0.75639		-0.0094
								-0.38785		5.146
								-0.11657		0.40595
								-0.85613		-0.0090106
								0.48091		-0.14194
								-0.089176		1.8593
								-0.77948		0.62752
								0.014406		7.8292
								13.404		0.21834
								-0.031385		6.0967
								0.65168		15.23
								-2.1242		-0.0030146
								0.0034243		-0.0058641
								0.39754		4.8201
								4.6417		15.842
								7.4813		1.9832
								-0.37338		2.688
								-0.025428		0.0193
								-1.8382		0.023747
								2.0892		16.256
								-0.44408		9.712
								-0.067228		0.069529
								5.8581		2.537
								-0.53564		5.96
								-0.79575		0.056114
								16.674		23.349
								-1.1879		1.0017
								2.192		2.1308
								-0.69484		0.67736
								-0.05085		0.12115
								1.4821		4.7363
								0.54236		-0.043127
								0.43018		-0.55605
								2.5035		-0.0020279
								-0.14565		-0.23231
								-0.50981		1.3157
								-0.070713		-0.056691
								-1.2761		3.8959
								-0.021333		-0.42276
								0.064627		0.00020521
								0.72339		2.0869
								0.33054		1.5767
								0.90361		0.38289
								-0.15107		1.3699
								12.227		2.4642
								-0.16593		1.9916
								-0.32979		-0.77918
								-0.37068		0.68273
								-0.37068		0.68273
								-0.20235		2.15e-05
								-2.2767		0.36341
								-1.1736		8.492
								-1.6583		-0.088498
								-0.80521		-1.3218
								-0.037363		2.0076
								-0.20235		2.15e-05
								2.0162		-0.44546
								-0.091491		1.6192
								-0.6932		-0.2181
								-0.85092		0.49004
								1.1803		0.36722
								-1.0915		-0.11855
								-0.087664		1.4879
								2.4758		4.4631
								14.715		0.66835
								-0.4029		0.85444
								2.7679		1.9828
								-1.0604		0.00017143
								-1.8257		0.14589
								0.0057776		-1.074
								-0.51529		23.043
								0.087818		71.317
								0.0031775		0.014125
								-0.29732		-0.77271
								-0.46828		0.24749
								-0.91103		-0.21922
								0.32559		0.19296
								0.45634		0.00060015
								-0.5934		-0.13205
								-1.1341		-0.17196
								16.84		7.6789
								-0.0013537		-1.0171
								-0.42422		0.1445
								0.0056114		17.753
								8.6315		0.55717
								1.3967		3.4566
								-0.0035221		0.0025974
								1.2509		2.8494
								0.11041		1.4733
								-0.28346		1.865
								-0.040416		5.54
								1.0225		2.7356
								0.0025199		1.4375
								-0.61066		0.055715
								-0.12099		5.8682
								-0.19376		0.056761
								-0.70363		0.10154
								-0.63696		0.18167
								70.241		85.15
								-0.34814		-0.090598
								-1.153		-0.0056252
								0.011055		0.37051
								0.26142		1.2338
								0.013243		-0.80482
								55.962		67.47
								-0.12275		3.7349
								-1.6506		-0.51418
								-1.6643		-0.018576
								-0.11243		-0.090908
								-0.044091		0.27653
								-1.2733		0.00016003
								-0.29378		0.46125
								-0.39757		-1.5991
								-0.093354		0.017174
								1.3802		-0.18985
								-0.19083		2.2962
								9.7438		2.4327
								0.035286		0.9867
								-0.036044		-0.061552
								7.7916		12.319
								-0.031501		11.063
								2.4051		2.6457
								-1.3394		-0.017988
								-1.0317		7.3383
								-0.00279		0.64371
								-0.0044116		0.11343
								0.017776		1.1666
								-1.1506		0.0074606
								-0.016676		-0.55229
								-2.1113		0.0022267
								1.4414		1.3212
								-0.23997		-0.1458
								-0.54067		-0.87826
								3.9244		-0.68508
								0.0076278		-0.0020802
								-0.00097324		0.57191
								-1.7421		0.0055689
								-0.34816		0.92178
								-0.63087		-1.1268
								-2.4507		0.149
								-0.12179		-0.085435
								39.232		0.34441
								-0.69218		-0.20057
								1.3553		-1.1018
								-0.018862		-0.037721
								-0.44372		13.138
								-0.44372		13.138
								1.0469		12.753
								0.078		5.0299
								-1.1344		0.19308
								0.73307		-0.016155
								-0.15287		1.7884
								-0.029704		0.003061
								7.2208		12.431
								-1.1777		-0.87048
								0.085611		1.1201
								5.228		1.5124
								-0.030239		-0.82988
								-1.3839		0.00023916
								-0.13529		1.5824
								-0.2143		0.016636
								-0.49695		-0.059929
								-0.55268		-0.064493
								-1.344		2.0502
								-0.014329		0.3106
								-0.80532		-0.21656
								-0.29238		-0.19969
								-1.7085		0.26977
								-0.025376		-0.33772
								-0.013545		0.90541
								1.0894		0.06725
								-1.342		-0.066654
								-0.080893		-0.30776
								-0.00078819		0.13074
								0.3427		0.15177
								6.2259		0.47057
								-0.35169		0.27714
								-0.44268		-0.003842
								-0.10283		5.9475
								0.028262		1.0183
								-0.51846		0.65116
								0.4108		-0.022372
								16.922		9.9652
								24.784		58.48
								1.1847		0.0010211
								2938.8		1969.9
								11.433		14.353
								6.0834		-0.015251
								-0.61765		5.0827
								0.087325		-0.025333
								0.00070064		0.068757
								0.33275		1.5
								0.80914		-0.17558
								0.25442		-0.18057
								17.767		20.003
								24.85		6.2269
								-0.93293		-0.49037
								13.361		0.57563
								0.0026074		5.7567
								-2.0425		0.74143
								-0.6298		34.983
								8.5724		-0.067671
								-0.36659		8.3586
								57.689		176.42
								0.004251		-0.1461
								1.2007		-0.013142
								0.43888		1.0056
								0.013814		0.98984
								0.45791		-0.055867
								-0.14121		-2.654
								0.00014929		-0.46078
								-0.030955		7.7657
								-0.73887		0.20918
								-0.041801		-0.0048885
								-0.64233		4.5395
								4.6384		4.4351
								-0.69957		1.5441
								-0.70152		20.245
								-0.41414		0.67441
								-0.1088		-0.19132
								-0.27616		-0.12101
								3.2509		4.9772
								-0.29046		-0.024619
								0.050259		3.7875
								2.8111		1.8353
								-0.2816		0.11918
								3.1978		-0.17763
								-4.4107		-0.10338
								1.6106		-0.27392
								-0.54997		8.4168
								-1.442		1.2131
								0.5104		7.0578
								-0.26042		0.63502
								0.0013929		-0.74526
								-0.10375		-1.2063
								1.7522		3.2389
								0.53456		0.19855
								-0.87194		-0.35516
								0.70713		-0.35381
								2.1672		-0.49226
								0.016449		-0.073492
								-0.2063		0.092069
								-0.39866		-0.30549
								-0.013037		-0.077853
								0.021345		-1.3581
								-1.452		0.041666
								-0.17806		-0.14807
								-0.32811		-0.015299
								-0.31638		0.37036
								-0.93642		-0.049325
								-0.022825		1.3988
								-0.51654		-1.7357
								15.014		1.1662
								0.66251		4.8563
								1.0905		0.13448
								70.871		-0.21231
								-1.4969		0.017052
								0.1426		0.56885
								0.67765		0.38232
								0.46424		-0.13099
								0.46544		9.891
								44.817		61.15
								13.712		38.371
								0.28908		53.011
								52.28		54.215
								276.82		119.49
								280.18		109.98
								91.313		3.5797
								85.591		3.0851
								0.27085		155.42
								-0.00041198		28.655
								3.0651		2.8147
								6.6904		109.15
								33.17		23.457
								50.709		450.34
								0.9348		40.806
								66.87		18.785
								37.187		81.712
								82.324		52.773
								486.09		164.99
								9.2675		10.318
								13.387		28.87
								32.846		27.191
								0.16992		62.376
								10.826		262.1
								-0.016348		42.673
								0.30421		21.141
								16.956		30.353
								12.073		12.16
								830.91		1011
								0.10368		2.1875
								7.6031		26.578
								5.7157		25.079
								2.1031		4.3722
								118.92		52.732
								4.8419		0.79028
								-0.25045		19.076
								0.21545		4.5649
								9.7722		22.092
								51.698		18.599
								149.19		15.425
								1.9513		108.32
								-2.6807		12.638
								0.20475		24.776
								919.47		198.53
								0.63342		6.8899
								25.287		16.26
								128.18		26.292
								0.0060647		0.99923
								615.58		113.46
								2.5318		0.90718
								8.446		2.8629
								2.3096		0.24668
								-2.0598		4.4671
								8.0189		0.4204
								7.0171		11.22
								864.99		314.14
								32.819		247.37
								0.20481		-0.43466
								51.147		1.7148
								0.076924		43.454
								40.313		21.842
								3.9159		24.446
								202.7		290.1
								-0.53092		0.97317
								384.07		82.727
								-0.48098		13.658
								101.68		131.3
								-0.74477		18.661
								171.15		20.597
								1.9683		11.305
								-1.0014		3.2312
								60.323		16.969
								0.0023695		11.951
								-0.11132		78.615
								68.667		73.677
								1.0592		3.1767
								6.279		1.0161
								0.16599		-0.012192
								185.38		42.21
								-0.0036295		13.532
								2.7616		4.9653
								182.38		35.945
								-0.088762		30.345
								0.39363		28.922
								0.94689		29.62
								-0.48706		5.1315
								2.0124		11.889
								-3.2419		2.1786
								6.7499		1.0477
								21.213		41.865
								-0.46053		11.718
								0.022908		3.1151
								3.2161		4.1356
								2.1928		2.36
								0.34703		1.7555
								2.2651		25.069
								4.7267		8.6976
								-0.60994		5.9958
								4.2594		3.9473
								17.093		23.886
								0.012345		5.7852
								-0.29738		13.958
								0.61582		22.539
								-0.0022402		38.082
								0.17758		2.0676
								0.14453		0.0093669
								-4.254		13.854
								38.047		9.1765
								0.20625		-0.025472
								9.846		31.213
								7.8174		2.2626
								3.5001		34.54
								-0.18747		0.4224
								11.175		167.06
								11.175		167.06
								-0.056323		0.24368
								5.808		0.48422
								-0.008303		6.9373
								12.871		0.97082
								2.3468		2.4466
								6.4479		0.13614
								26.156		16.264
								108.09		0.36177
								17.389		1.1509
								18.485		5.9758
								-0.011716		10.344
								-0.58221		0.62885
								2.3234		1.7462
								0.042412		11.525
								-0.50729		-0.43817
								2.3247		8.0398
								3.5145		5.0647
								1.9189		-0.88805
								2.0968		0.047032
								0.12928		0.00045812
								5.8314		0.36489
								65.819		11.056
								-0.057548		1.2944
								7.6135		3.6661
								-0.78365		0.0040598
								0.28044		3.2457
								1.3372		8.1888
								2.5644		4.4868
								-0.78038		8.2035
								-0.11566		-0.03649
								42.437		23.305
								0.049393		1.634
								0.32743		8.7575
								0.0066725		0.012416
								2.7522		11.521
								-0.51231		11.915
								0.75958		9.3624
								49.534		39.049
								4.1722		0.52001
								0.060865		-0.69668
								0.054314		0.63832
								13.369		13.501
								11.044		1.5688
								9.1256		0.011878
								0.63034		2.1238
								0.013242		3.0929
								0.70224		0.63155
								14.792		3.1912
								0.77116		-0.13646
								4.1791		2.5146
								0.10977		-0.2676
								0.52255		0.053289
								48.963		53.699
								1.8428		-0.13813
								-0.089025		2.6701
								2.7386		196.52
								10.923		331.09
								0.0087099		9.7918
								1.2789		0.26165
								1.1916		43.821
								1.0087		39.446
								321.68		69.084
								-0.025928		0.45739
								-0.15724		0.63204
								0.054583		0.39786
								4.0117		2.0045
								10.232		40.639
								105.65		167.09
								6.2903		-0.009519
								2.2235		0.16952
								39.635		419.23
								47.009		15.838
								0.045208		0.23132
								18.67		0.43329
								0.2155		1.9703
								-0.70852		4.2147
								0.51083		20.462
								-0.059297		20.628
								-0.08594		2.9592
								0.37908		2.1366
								0.46884		27.985
								6.5412		55.157
								0.12995		9.8273
								-0.33156		2.4711
								81.908		158.74
								15.195		4.4839
								1.6191		1.9628
								0.54259		0.010969
								-0.010029		1.8447
								-0.84221		8.7928
								100.37		41.921
								15.735		118.84
								6.6504		32.558
								-0.092344		3.1593
								2.3878		0.20418
								2.074		21.468
								-0.0034647		2.7739
								-0.17857		-1.1509
								7.6024		1.1718
								34.373		15.178
								-0.053607		0.0042321
								0.21409		0.33448
								0.78705		2.1324
								1.5159		3.4316
								3.6575		4.0579
								-0.83104		8.0795
								-1.1142		3.0525
								9.9097		5.0607
								-0.25535		0.23669
								60.782		0.85536
								-0.20274		-0.00039396
								9.5553		69.692
								0.028608		-0.04967
								-0.051721		5.4678
								10.445		0.77213
								0.0024304		-0.19737
								7.8708		2.782
								4.5782		-0.33071
								0.18614		0.055309
								13.932		0.98356
								9.8128		3.6227
								-0.16227		0.5134
								0.39017		-0.099965
								0.027359		1.9571
								9.4901		0.47358
								0.015831		26.249
								12.051		212.55
								0.95419		1.5589
								13.223		6.9313
								-0.73411		5.6133
								-0.11173		4.6754
								13.011		23.681
								1.5213		-0.63538
								0.69796		23.526
								98.825		134.8
								-0.46109		0.43503
								4.3819		3.6012
								78.634		53.09
								78.634		53.09
								0.87809		-0.087882
								0.010585		4.8296
								1.1154		72.693
								2.5551		6.0358
								-0.82624		0.7831
								-0.72753		0.15086
								-0.059319		0.10799
								1.7526		0.53512
								-0.31116		5.6353
								-0.58458		-0.64748
								0.12909		2925.9

## Sheet: Sheet3
terms	OMIC gene counts		tumor specific responding	61		normal specific responding	76		no responding	39		consistent responding	10		divergent responding	55
tumor specific responding	61		tumor specific responding	49		normal specific responding	46		no responding	38		consistent responding	7		divergent responding	52
tumor specific responding	24		tumor specific responding	35		normal specific responding	39		no responding	33		consistent responding	5		divergent responding	52
tumor specific responding	3		tumor specific responding	35		normal specific responding	28		no responding	33		consistent responding	5		divergent responding	44
tumor specific responding	4		tumor specific responding	33		normal specific responding	28		no responding	30		consistent responding	4		divergent responding	38
tumor specific responding	22		tumor specific responding	33		normal specific responding	28		no responding	27		consistent responding	4		divergent responding	38
tumor specific responding	3		tumor specific responding	32		normal specific responding	25		no responding	26		consistent responding	4		divergent responding	37
tumor specific responding	19		tumor specific responding	29		normal specific responding	24		no responding	24		consistent responding	3		divergent responding	35
tumor specific responding	6		tumor specific responding	27		normal specific responding	23		no responding	24		consistent responding	3		divergent responding	34
tumor specific responding	18		tumor specific responding	27		normal specific responding	22		no responding	23		consistent responding	3		divergent responding	31
tumor specific responding	16		tumor specific responding	27		normal specific responding	22		no responding	21		consistent responding	2		divergent responding	31
tumor specific responding	5		tumor specific responding	26		normal specific responding	22		no responding	20		consistent responding	2		divergent responding	30
tumor specific responding	26		tumor specific responding	26		normal specific responding	19		no responding	20		consistent responding	2		divergent responding	28
tumor specific responding	19		tumor specific responding	24		normal specific responding	18		no responding	18		consistent responding	2		divergent responding	27
tumor specific responding	33		tumor specific responding	23		normal specific responding	15		no responding	17		consistent responding	2		divergent responding	26
tumor specific responding	19		tumor specific responding	23		normal specific responding	15		no responding	17		consistent responding	2		divergent responding	25
tumor specific responding	27		tumor specific responding	23		normal specific responding	14		no responding	16		consistent responding	2		divergent responding	24
tumor specific responding	7		tumor specific responding	23		normal specific responding	12		no responding	16		consistent responding	1		divergent responding	23
tumor specific responding	6		tumor specific responding	23		normal specific responding	12		no responding	15		consistent responding	1		divergent responding	22
tumor specific responding	27		tumor specific responding	22		normal specific responding	12		no responding	15		consistent responding	0		divergent responding	22
tumor specific responding	27		tumor specific responding	21		normal specific responding	12		no responding	15		consistent responding	0		divergent responding	21
tumor specific responding	17		tumor specific responding	21		normal specific responding	12		no responding	15		consistent responding	0		divergent responding	21
tumor specific responding	23		tumor specific responding	21		normal specific responding	11		no responding	14		consistent responding	0		divergent responding	21
tumor specific responding	23		tumor specific responding	19		normal specific responding	11		no responding	14		consistent responding	0		divergent responding	20
tumor specific responding	12		tumor specific responding	19		normal specific responding	10		no responding	13		consistent responding	0		divergent responding	20
tumor specific responding	10		tumor specific responding	19		normal specific responding	10		no responding	13		consistent responding	0		divergent responding	19
tumor specific responding	14		tumor specific responding	18		normal specific responding	10		no responding	13					divergent responding	19
tumor specific responding	8		tumor specific responding	18		normal specific responding	10		no responding	12					divergent responding	19
tumor specific responding	2		tumor specific responding	18		normal specific responding	9		no responding	12					divergent responding	18
tumor specific responding	3		tumor specific responding	18		normal specific responding	9		no responding	12					divergent responding	17
tumor specific responding	15		tumor specific responding	17		normal specific responding	9		no responding	11					divergent responding	17
tumor specific responding	1		tumor specific responding	16		normal specific responding	9		no responding	11					divergent responding	16
tumor specific responding	16		tumor specific responding	16		normal specific responding	9		no responding	11					divergent responding	16
tumor specific responding	16		tumor specific responding	16		normal specific responding	9		no responding	11					divergent responding	15
tumor specific responding	3		tumor specific responding	16		normal specific responding	9		no responding	11					divergent responding	15
tumor specific responding	26		tumor specific responding	16		normal specific responding	9		no responding	10					divergent responding	15
tumor specific responding	16		tumor specific responding	15		normal specific responding	8		no responding	10					divergent responding	15
tumor specific responding	7		tumor specific responding	15		normal specific responding	8		no responding	10					divergent responding	15
tumor specific responding	1		tumor specific responding	14		normal specific responding	8		no responding	10					divergent responding	14
tumor specific responding	4		tumor specific responding	14		normal specific responding	8		no responding	10					divergent responding	14
tumor specific responding	4		tumor specific responding	14		normal specific responding	8		no responding	10					divergent responding	14
tumor specific responding	18		tumor specific responding	14		normal specific responding	8		no responding	9					divergent responding	14
tumor specific responding	5		tumor specific responding	14		normal specific responding	7		no responding	9					divergent responding	13
tumor specific responding	5		tumor specific responding	13		normal specific responding	7		no responding	9					divergent responding	12
tumor specific responding	11		tumor specific responding	13		normal specific responding	7		no responding	9					divergent responding	12
tumor specific responding	4		tumor specific responding	12		normal specific responding	7		no responding	9					divergent responding	12
tumor specific responding	1		tumor specific responding	12		normal specific responding	7		no responding	9					divergent responding	12
tumor specific responding	4		tumor specific responding	12		normal specific responding	7		no responding	9					divergent responding	11
tumor specific responding	9		tumor specific responding	11		normal specific responding	7		no responding	9					divergent responding	11
tumor specific responding	10		tumor specific responding	11		normal specific responding	6		no responding	9					divergent responding	11
tumor specific responding	18		tumor specific responding	11		normal specific responding	6		no responding	9					divergent responding	11
tumor specific responding	3		tumor specific responding	11		normal specific responding	6		no responding	9					divergent responding	11
tumor specific responding	2		tumor specific responding	11		normal specific responding	6		no responding	9					divergent responding	10
tumor specific responding	3		tumor specific responding	10		normal specific responding	6		no responding	9					divergent responding	10
tumor specific responding	4		tumor specific responding	10		normal specific responding	6		no responding	9					divergent responding	10
tumor specific responding	1		tumor specific responding	10		normal specific responding	6		no responding	8					divergent responding	10
tumor specific responding	1		tumor specific responding	10		normal specific responding	6		no responding	8					divergent responding	10
tumor specific responding	5		tumor specific responding	10		normal specific responding	6		no responding	8					divergent responding	10
tumor specific responding	4		tumor specific responding	10		normal specific responding	5		no responding	8					divergent responding	9
tumor specific responding	8		tumor specific responding	10		normal specific responding	5		no responding	8					divergent responding	9
tumor specific responding	4		tumor specific responding	9		normal specific responding	5		no responding	8					divergent responding	9
tumor specific responding	2		tumor specific responding	9		normal specific responding	5		no responding	8					divergent responding	9
tumor specific responding	4		tumor specific responding	9		normal specific responding	5		no responding	7					divergent responding	9
tumor specific responding	4		tumor specific responding	9		normal specific responding	5		no responding	7					divergent responding	9
tumor specific responding	8		tumor specific responding	9		normal specific responding	5		no responding	7					divergent responding	9
tumor specific responding	3		tumor specific responding	9		normal specific responding	5		no responding	7					divergent responding	9
tumor specific responding	14		tumor specific responding	9		normal specific responding	5		no responding	7					divergent responding	8
tumor specific responding	4		tumor specific responding	9		normal specific responding	5		no responding	7					divergent responding	8
tumor specific responding	0		tumor specific responding	9		normal specific responding	5		no responding	7					divergent responding	8
tumor specific responding	3		tumor specific responding	8		normal specific responding	4		no responding	7					divergent responding	8
tumor specific responding	14		tumor specific responding	8		normal specific responding	4		no responding	7					divergent responding	8
tumor specific responding	3		tumor specific responding	8		normal specific responding	4		no responding	7					divergent responding	8
tumor specific responding	8		tumor specific responding	8		normal specific responding	4		no responding	7					divergent responding	8
tumor specific responding	8		tumor specific responding	8		normal specific responding	4		no responding	7					divergent responding	8
tumor specific responding	3		tumor specific responding	8		normal specific responding	4		no responding	6					divergent responding	8
tumor specific responding	6		tumor specific responding	8		normal specific responding	4		no responding	6					divergent responding	8
tumor specific responding	0		tumor specific responding	8		normal specific responding	4		no responding	6					divergent responding	8
tumor specific responding	2		tumor specific responding	8		normal specific responding	4		no responding	6					divergent responding	7
tumor specific responding	2		tumor specific responding	8		normal specific responding	4		no responding	6					divergent responding	7
tumor specific responding	1		tumor specific responding	8		normal specific responding	4		no responding	6					divergent responding	7
tumor specific responding	7		tumor specific responding	8		normal specific responding	4		no responding	6					divergent responding	7
tumor specific responding	6		tumor specific responding	8		normal specific responding	4		no responding	6					divergent responding	7
tumor specific responding	5		tumor specific responding	8		normal specific responding	4		no responding	6					divergent responding	7
tumor specific responding	6		tumor specific responding	8		normal specific responding	3		no responding	6					divergent responding	7
tumor specific responding	0		tumor specific responding	8		normal specific responding	3		no responding	6					divergent responding	7
tumor specific responding	8		tumor specific responding	8		normal specific responding	3		no responding	6					divergent responding	7
tumor specific responding	3		tumor specific responding	8		normal specific responding	3		no responding	6					divergent responding	7
tumor specific responding	11		tumor specific responding	8		normal specific responding	3		no responding	5					divergent responding	6
tumor specific responding	3		tumor specific responding	8		normal specific responding	3		no responding	5					divergent responding	6
tumor specific responding	7		tumor specific responding	7		normal specific responding	3		no responding	5					divergent responding	6
tumor specific responding	6		tumor specific responding	7		normal specific responding	3		no responding	5					divergent responding	6
tumor specific responding	2		tumor specific responding	7		normal specific responding	3		no responding	5					divergent responding	6
tumor specific responding	2		tumor specific responding	7		normal specific responding	3		no responding	5					divergent responding	6
tumor specific responding	4		tumor specific responding	7		normal specific responding	3		no responding	5					divergent responding	6
tumor specific responding	2		tumor specific responding	7		normal specific responding	3		no responding	5					divergent responding	6
tumor specific responding	7		tumor specific responding	7		normal specific responding	3		no responding	5					divergent responding	6
tumor specific responding	6		tumor specific responding	7		normal specific responding	3		no responding	5					divergent responding	6
tumor specific responding	7		tumor specific responding	7		normal specific responding	3		no responding	5					divergent responding	6
tumor specific responding	14		tumor specific responding	7		normal specific responding	3		no responding	5					divergent responding	5
tumor specific responding	3		tumor specific responding	7		normal specific responding	3		no responding	5					divergent responding	5
tumor specific responding	2		tumor specific responding	7		normal specific responding	3		no responding	5					divergent responding	5
tumor specific responding	2		tumor specific responding	7		normal specific responding	3		no responding	5					divergent responding	5
tumor specific responding	3		tumor specific responding	7		normal specific responding	3		no responding	5					divergent responding	5
tumor specific responding	5		tumor specific responding	7		normal specific responding	3		no responding	5					divergent responding	5
tumor specific responding	9		tumor specific responding	7		normal specific responding	2		no responding	5					divergent responding	5
tumor specific responding	1		tumor specific responding	7		normal specific responding	2		no responding	5					divergent responding	5
tumor specific responding	0		tumor specific responding	6		normal specific responding	2		no responding	5					divergent responding	5
tumor specific responding	5		tumor specific responding	6		normal specific responding	2		no responding	5					divergent responding	5
tumor specific responding	1		tumor specific responding	6		normal specific responding	2		no responding	5					divergent responding	5
tumor specific responding	0		tumor specific responding	6		normal specific responding	2		no responding	4					divergent responding	5
tumor specific responding	1		tumor specific responding	6		normal specific responding	2		no responding	4					divergent responding	5
tumor specific responding	6		tumor specific responding	6		normal specific responding	2		no responding	4					divergent responding	5
tumor specific responding	5		tumor specific responding	6		normal specific responding	2		no responding	4					divergent responding	5
tumor specific responding	0		tumor specific responding	6		normal specific responding	2		no responding	4					divergent responding	5
tumor specific responding	0		tumor specific responding	6		normal specific responding	2		no responding	4					divergent responding	4
tumor specific responding	4		tumor specific responding	6		normal specific responding	2		no responding	4					divergent responding	4
tumor specific responding	0		tumor specific responding	6		normal specific responding	2		no responding	4					divergent responding	4
tumor specific responding	6		tumor specific responding	6		normal specific responding	2		no responding	4					divergent responding	4
tumor specific responding	1		tumor specific responding	6		normal specific responding	2		no responding	4					divergent responding	4
tumor specific responding	2		tumor specific responding	6		normal specific responding	2		no responding	4					divergent responding	4
tumor specific responding	3		tumor specific responding	6		normal specific responding	2		no responding	4					divergent responding	4
tumor specific responding	2		tumor specific responding	6		normal specific responding	2		no responding	4					divergent responding	4
tumor specific responding	2		tumor specific responding	5		normal specific responding	2		no responding	4					divergent responding	4
tumor specific responding	0		tumor specific responding	5		normal specific responding	2		no responding	4					divergent responding	4
tumor specific responding	7		tumor specific responding	5		normal specific responding	2		no responding	4					divergent responding	4
tumor specific responding	10		tumor specific responding	5		normal specific responding	2		no responding	4					divergent responding	4
tumor specific responding	6		tumor specific responding	5		normal specific responding	2		no responding	4					divergent responding	4
tumor specific responding	2		tumor specific responding	5		normal specific responding	2		no responding	4					divergent responding	4
tumor specific responding	7		tumor specific responding	5		normal specific responding	2		no responding	4					divergent responding	4
tumor specific responding	0		tumor specific responding	5		normal specific responding	2		no responding	4					divergent responding	4
tumor specific responding	2		tumor specific responding	5		normal specific responding	2		no responding	4					divergent responding	3
tumor specific responding	0		tumor specific responding	5		normal specific responding	2		no responding	4					divergent responding	3
tumor specific responding	0		tumor specific responding	5		normal specific responding	2		no responding	4					divergent responding	3
tumor specific responding	2		tumor specific responding	5		normal specific responding	1		no responding	4					divergent responding	3
tumor specific responding	0		tumor specific responding	5		normal specific responding	1		no responding	4					divergent responding	3
tumor specific responding	3		tumor specific responding	5		normal specific responding	1		no responding	4					divergent responding	3
tumor specific responding	10		tumor specific responding	5		normal specific responding	1		no responding	4					divergent responding	3
tumor specific responding	3		tumor specific responding	5		normal specific responding	1		no responding	4					divergent responding	3
tumor specific responding	2		tumor specific responding	5		normal specific responding	1		no responding	3					divergent responding	3
tumor specific responding	0		tumor specific responding	5		normal specific responding	1		no responding	3					divergent responding	3
tumor specific responding	1		tumor specific responding	5		normal specific responding	1		no responding	3					divergent responding	3
tumor specific responding	4		tumor specific responding	5		normal specific responding	1		no responding	3					divergent responding	3
tumor specific responding	4		tumor specific responding	5		normal specific responding	1		no responding	3					divergent responding	3
tumor specific responding	5		tumor specific responding	5		normal specific responding	1		no responding	3					divergent responding	3
tumor specific responding	3		tumor specific responding	5		normal specific responding	1		no responding	3					divergent responding	3
tumor specific responding	5		tumor specific responding	5		normal specific responding	1		no responding	3					divergent responding	3
tumor specific responding	6		tumor specific responding	4		normal specific responding	1		no responding	3					divergent responding	3
tumor specific responding	0		tumor specific responding	4		normal specific responding	1		no responding	3					divergent responding	3
tumor specific responding	2		tumor specific responding	4		normal specific responding	1		no responding	3					divergent responding	3
tumor specific responding	0		tumor specific responding	4		normal specific responding	1		no responding	3					divergent responding	3
tumor specific responding	0		tumor specific responding	4		normal specific responding	1		no responding	3					divergent responding	3
tumor specific responding	3		tumor specific responding	4		normal specific responding	1		no responding	3					divergent responding	3
tumor specific responding	3		tumor specific responding	4		normal specific responding	1		no responding	3					divergent responding	2
tumor specific responding	0		tumor specific responding	4		normal specific responding	1		no responding	3					divergent responding	2
tumor specific responding	0		tumor specific responding	4		normal specific responding	1		no responding	3					divergent responding	2
tumor specific responding	7		tumor specific responding	4		normal specific responding	1		no responding	3					divergent responding	2
tumor specific responding	2		tumor specific responding	4		normal specific responding	1		no responding	3					divergent responding	2
tumor specific responding	2		tumor specific responding	4		normal specific responding	1		no responding	3					divergent responding	2
tumor specific responding	1		tumor specific responding	4		normal specific responding	1		no responding	3					divergent responding	2
tumor specific responding	7		tumor specific responding	4		normal specific responding	1		no responding	3					divergent responding	2
tumor specific responding	0		tumor specific responding	4		normal specific responding	1		no responding	3					divergent responding	2
tumor specific responding	2		tumor specific responding	4		normal specific responding	1		no responding	3					divergent responding	2
tumor specific responding	0		tumor specific responding	4		normal specific responding	1		no responding	3					divergent responding	2
tumor specific responding	3		tumor specific responding	4		normal specific responding	1		no responding	3					divergent responding	2
tumor specific responding	2		tumor specific responding	4		normal specific responding	1		no responding	3					divergent responding	2
tumor specific responding	3		tumor specific responding	4		normal specific responding	1		no responding	3					divergent responding	2
tumor specific responding	1		tumor specific responding	4		normal specific responding	1		no responding	3					divergent responding	2
tumor specific responding	0		tumor specific responding	4		normal specific responding	1		no responding	3					divergent responding	2
tumor specific responding	0		tumor specific responding	4		normal specific responding	1		no responding	3					divergent responding	2
tumor specific responding	0		tumor specific responding	4		normal specific responding	1		no responding	3					divergent responding	2
tumor specific responding	1		tumor specific responding	4		normal specific responding	1		no responding	3					divergent responding	2
tumor specific responding	0		tumor specific responding	4		normal specific responding	1		no responding	3					divergent responding	2
tumor specific responding	1		tumor specific responding	4		normal specific responding	1		no responding	3					divergent responding	2
tumor specific responding	1		tumor specific responding	4		normal specific responding	0		no responding	3					divergent responding	2
tumor specific responding	2		tumor specific responding	4		normal specific responding	0		no responding	3					divergent responding	2
tumor specific responding	5		tumor specific responding	4		normal specific responding	0		no responding	3					divergent responding	2
tumor specific responding	2		tumor specific responding	3		normal specific responding	0		no responding	3					divergent responding	2
tumor specific responding	0		tumor specific responding	3		normal specific responding	0		no responding	3					divergent responding	2
tumor specific responding	5		tumor specific responding	3		normal specific responding	0		no responding	3					divergent responding	2
tumor specific responding	0		tumor specific responding	3		normal specific responding	0		no responding	3					divergent responding	2
tumor specific responding	0		tumor specific responding	3		normal specific responding	0		no responding	3					divergent responding	2
tumor specific responding	2		tumor specific responding	3		normal specific responding	0		no responding	2					divergent responding	2
tumor specific responding	3		tumor specific responding	3		normal specific responding	0		no responding	2					divergent responding	2
tumor specific responding	2		tumor specific responding	3		normal specific responding	0		no responding	2					divergent responding	1
tumor specific responding	2		tumor specific responding	3		normal specific responding	0		no responding	2					divergent responding	1
tumor specific responding	5		tumor specific responding	3		normal specific responding	0		no responding	2					divergent responding	1
tumor specific responding	0		tumor specific responding	3		normal specific responding	0		no responding	2					divergent responding	1
tumor specific responding	2		tumor specific responding	3		normal specific responding	0		no responding	2					divergent responding	1
tumor specific responding	0		tumor specific responding	3		normal specific responding	0		no responding	2					divergent responding	1
tumor specific responding	1		tumor specific responding	3		normal specific responding	0		no responding	2					divergent responding	1
tumor specific responding	1		tumor specific responding	3		normal specific responding	0		no responding	2					divergent responding	1
tumor specific responding	0		tumor specific responding	3		normal specific responding	0		no responding	2					divergent responding	1
tumor specific responding	0		tumor specific responding	3		normal specific responding	0		no responding	2					divergent responding	1
tumor specific responding	2		tumor specific responding	3		normal specific responding	0		no responding	2					divergent responding	1
tumor specific responding	3		tumor specific responding	3		normal specific responding	0		no responding	2					divergent responding	1
tumor specific responding	0		tumor specific responding	3		normal specific responding	0		no responding	2					divergent responding	1
tumor specific responding	1		tumor specific responding	3		normal specific responding	0		no responding	2					divergent responding	1
tumor specific responding	0		tumor specific responding	3		normal specific responding	0		no responding	2					divergent responding	1
tumor specific responding	0		tumor specific responding	3		normal specific responding	0		no responding	2					divergent responding	1
tumor specific responding	0		tumor specific responding	3		normal specific responding	0		no responding	2					divergent responding	1
tumor specific responding	1		tumor specific responding	3		normal specific responding	0		no responding	2					divergent responding	1
tumor specific responding	0		tumor specific responding	3		normal specific responding	0		no responding	2					divergent responding	1
tumor specific responding	1		tumor specific responding	3		normal specific responding	0		no responding	2					divergent responding	1
tumor specific responding	0		tumor specific responding	3		normal specific responding	0		no responding	2					divergent responding	1
tumor specific responding	4		tumor specific responding	3		normal specific responding	0		no responding	2					divergent responding	1
tumor specific responding	1		tumor specific responding	3		normal specific responding	0		no responding	2					divergent responding	1
tumor specific responding	0		tumor specific responding	3		normal specific responding	0		no responding	2					divergent responding	1
tumor specific responding	2		tumor specific responding	3		normal specific responding	0		no responding	2					divergent responding	1
tumor specific responding	4		tumor specific responding	3		normal specific responding	0		no responding	2					divergent responding	1
tumor specific responding	0		tumor specific responding	3		normal specific responding	0		no responding	2					divergent responding	1
tumor specific responding	0		tumor specific responding	3		normal specific responding	0		no responding	2					divergent responding	0
tumor specific responding	2		tumor specific responding	3		normal specific responding	0		no responding	2					divergent responding	0
tumor specific responding	2		tumor specific responding	3		normal specific responding	0		no responding	2					divergent responding	0
tumor specific responding	1		tumor specific responding	3		normal specific responding	0		no responding	2					divergent responding	0
tumor specific responding	3		tumor specific responding	2					no responding	2					divergent responding	0
tumor specific responding	0		tumor specific responding	2					no responding	2					divergent responding	0
tumor specific responding	0		tumor specific responding	2					no responding	2					divergent responding	0
tumor specific responding	2		tumor specific responding	2					no responding	2					divergent responding	0
tumor specific responding	0		tumor specific responding	2					no responding	2					divergent responding	0
tumor specific responding	0		tumor specific responding	2					no responding	2					divergent responding	0
tumor specific responding	0		tumor specific responding	2					no responding	2					divergent responding	0
tumor specific responding	2		tumor specific responding	2					no responding	2					divergent responding	0
tumor specific responding	1		tumor specific responding	2					no responding	2					divergent responding	0
tumor specific responding	2		tumor specific responding	2					no responding	2					divergent responding	0
tumor specific responding	1		tumor specific responding	2					no responding	2					divergent responding	0
tumor specific responding	1		tumor specific responding	2					no responding	1					divergent responding	0
tumor specific responding	0		tumor specific responding	2					no responding	1					divergent responding	0
tumor specific responding	1		tumor specific responding	2					no responding	1					divergent responding	0
tumor specific responding	1		tumor specific responding	2					no responding	1					divergent responding	0
tumor specific responding	2		tumor specific responding	2					no responding	1					divergent responding	0
tumor specific responding	3		tumor specific responding	2					no responding	1					divergent responding	0
tumor specific responding	4		tumor specific responding	2					no responding	1					divergent responding	0
tumor specific responding	2		tumor specific responding	2					no responding	1					divergent responding	0
tumor specific responding	1		tumor specific responding	2					no responding	1					divergent responding	0
tumor specific responding	0		tumor specific responding	2					no responding	1					divergent responding	0
tumor specific responding	0		tumor specific responding	2					no responding	1					divergent responding	0
tumor specific responding	0		tumor specific responding	2					no responding	1					divergent responding	0
tumor specific responding	1		tumor specific responding	2					no responding	1					divergent responding	0
tumor specific responding	2		tumor specific responding	2					no responding	1					divergent responding	0
tumor specific responding	0		tumor specific responding	2					no responding	1					divergent responding	0
tumor specific responding	0		tumor specific responding	2					no responding	1
tumor specific responding	0		tumor specific responding	2					no responding	1
tumor specific responding	1		tumor specific responding	2					no responding	1
tumor specific responding	1		tumor specific responding	2					no responding	1
tumor specific responding	1		tumor specific responding	2					no responding	1
tumor specific responding	0		tumor specific responding	2					no responding	1
tumor specific responding	2		tumor specific responding	2					no responding	1
tumor specific responding	1		tumor specific responding	2					no responding	1
tumor specific responding	0		tumor specific responding	2					no responding	1
tumor specific responding	0		tumor specific responding	2					no responding	1
tumor specific responding	0		tumor specific responding	2					no responding	1
tumor specific responding	2		tumor specific responding	2					no responding	1
tumor specific responding	23		tumor specific responding	2					no responding	1
tumor specific responding	16		tumor specific responding	2					no responding	1
tumor specific responding	7		tumor specific responding	2					no responding	1
tumor specific responding	18		tumor specific responding	2					no responding	1
tumor specific responding	14		tumor specific responding	2					no responding	1
tumor specific responding	8		tumor specific responding	2					no responding	1
tumor specific responding	3		tumor specific responding	2					no responding	1
tumor specific responding	0		tumor specific responding	2					no responding	1
tumor specific responding	9		tumor specific responding	2					no responding	1
tumor specific responding	10		tumor specific responding	2					no responding	1
tumor specific responding	32		tumor specific responding	2					no responding	1
tumor specific responding	21		tumor specific responding	2					no responding	1
tumor specific responding	13		tumor specific responding	2					no responding	1
tumor specific responding	13		tumor specific responding	2					no responding	1
tumor specific responding	12		tumor specific responding	2					no responding	1
tumor specific responding	12		tumor specific responding	2					no responding	1
tumor specific responding	21		tumor specific responding	1					no responding	1
tumor specific responding	21		tumor specific responding	1					no responding	1
tumor specific responding	0		tumor specific responding	1					no responding	1
tumor specific responding	1		tumor specific responding	1					no responding	1
tumor specific responding	0		tumor specific responding	1					no responding	1
tumor specific responding	6		tumor specific responding	1					no responding	1
tumor specific responding	2		tumor specific responding	1					no responding	1
tumor specific responding	23		tumor specific responding	1					no responding	1
tumor specific responding	1		tumor specific responding	1					no responding	1
tumor specific responding	0		tumor specific responding	1					no responding	1
tumor specific responding	3		tumor specific responding	1					no responding	1
tumor specific responding	8		tumor specific responding	1					no responding	1
tumor specific responding	0		tumor specific responding	1					no responding	1
tumor specific responding	2		tumor specific responding	1					no responding	1
tumor specific responding	1		tumor specific responding	1					no responding	1
tumor specific responding	3		tumor specific responding	1					no responding	1
tumor specific responding	5		tumor specific responding	1					no responding	1
tumor specific responding	2		tumor specific responding	1					no responding	1
tumor specific responding	3		tumor specific responding	1					no responding	1
tumor specific responding	0		tumor specific responding	1					no responding	1
tumor specific responding	0		tumor specific responding	1					no responding	1
tumor specific responding	0		tumor specific responding	1					no responding	1
tumor specific responding	1		tumor specific responding	1					no responding	1
tumor specific responding	0		tumor specific responding	1					no responding	1
tumor specific responding	0		tumor specific responding	1					no responding	1
tumor specific responding	0		tumor specific responding	1					no responding	1
tumor specific responding	0		tumor specific responding	1					no responding	1
tumor specific responding	2		tumor specific responding	1					no responding	1
tumor specific responding	0		tumor specific responding	1					no responding	1
tumor specific responding	1		tumor specific responding	1					no responding	1
tumor specific responding	0		tumor specific responding	1					no responding	1
tumor specific responding	0		tumor specific responding	1					no responding	1
tumor specific responding	1		tumor specific responding	1					no responding	1
tumor specific responding	0		tumor specific responding	1					no responding	1
tumor specific responding	9		tumor specific responding	1					no responding	0
tumor specific responding	8		tumor specific responding	1					no responding	0
tumor specific responding	11		tumor specific responding	1					no responding	0
tumor specific responding	7		tumor specific responding	1					no responding	0
tumor specific responding	8		tumor specific responding	1					no responding	0
tumor specific responding	8		tumor specific responding	1					no responding	0
tumor specific responding	11		tumor specific responding	1					no responding	0
tumor specific responding	3		tumor specific responding	1					no responding	0
tumor specific responding	4		tumor specific responding	1					no responding	0
tumor specific responding	5		tumor specific responding	1					no responding	0
tumor specific responding	3		tumor specific responding	1					no responding	0
tumor specific responding	8		tumor specific responding	1					no responding	0
tumor specific responding	8		tumor specific responding	1					no responding	0
tumor specific responding	9		tumor specific responding	1					no responding	0
tumor specific responding	2		tumor specific responding	1					no responding	0
tumor specific responding	10		tumor specific responding	0					no responding	0
tumor specific responding	1		tumor specific responding	0					no responding	0
tumor specific responding	3		tumor specific responding	0					no responding	0
tumor specific responding	3		tumor specific responding	0					no responding	0
tumor specific responding	9		tumor specific responding	0					no responding	0
tumor specific responding	1		tumor specific responding	0					no responding	0
tumor specific responding	7		tumor specific responding	0					no responding	0
tumor specific responding	8		tumor specific responding	0					no responding	0
tumor specific responding	8		tumor specific responding	0					no responding	0
tumor specific responding	5		tumor specific responding	0					no responding	0
tumor specific responding	6		tumor specific responding	0					no responding	0
tumor specific responding	5		tumor specific responding	0					no responding	0
tumor specific responding	11		tumor specific responding	0					no responding	0
tumor specific responding	4		tumor specific responding	0					no responding	0
tumor specific responding	7		tumor specific responding	0					no responding	0
tumor specific responding	2		tumor specific responding	0					no responding	0
tumor specific responding	5		tumor specific responding	0					no responding	0
tumor specific responding	9		tumor specific responding	0					no responding	0
tumor specific responding	5		tumor specific responding	0					no responding	0
tumor specific responding	9		tumor specific responding	0					no responding	0
tumor specific responding	10		tumor specific responding	0					no responding	0
tumor specific responding	7		tumor specific responding	0					no responding	0
tumor specific responding	5		tumor specific responding	0					no responding	0
tumor specific responding	1		tumor specific responding	0					no responding	0
tumor specific responding	7		tumor specific responding	0					no responding	0
tumor specific responding	6		tumor specific responding	0					no responding	0
tumor specific responding	2		tumor specific responding	0					no responding	0
tumor specific responding	2		tumor specific responding	0					no responding	0
tumor specific responding	5		tumor specific responding	0					no responding	0
tumor specific responding	2		tumor specific responding	0					no responding	0
tumor specific responding	9		tumor specific responding	0					no responding	0
tumor specific responding	6		tumor specific responding	0					no responding	0
tumor specific responding	4		tumor specific responding	0					no responding	0
tumor specific responding	4		tumor specific responding	0					no responding	0
tumor specific responding	6		tumor specific responding	0					no responding	0
tumor specific responding	2		tumor specific responding	0					no responding	0
tumor specific responding	0		tumor specific responding	0					no responding	0
tumor specific responding	7		tumor specific responding	0					no responding	0
tumor specific responding	3		tumor specific responding	0					no responding	0
tumor specific responding	2		tumor specific responding	0					no responding	0
tumor specific responding	4		tumor specific responding	0					no responding	0
tumor specific responding	1		tumor specific responding	0					no responding	0
tumor specific responding	4		tumor specific responding	0					no responding	0
tumor specific responding	5		tumor specific responding	0					no responding	0
tumor specific responding	49		tumor specific responding	0					no responding	0
tumor specific responding	35		tumor specific responding	0					no responding	0
tumor specific responding	35		tumor specific responding	0					no responding	0
tumor specific responding	1		tumor specific responding	0					no responding	0
tumor specific responding	8		tumor specific responding	0					no responding	0
tumor specific responding	33		tumor specific responding	0					no responding	0
tumor specific responding	8		tumor specific responding	0					no responding	0
tumor specific responding	8		tumor specific responding	0					no responding	0
tumor specific responding	8		tumor specific responding	0					no responding	0
tumor specific responding	8		tumor specific responding	0					no responding	0
tumor specific responding	29		tumor specific responding	0					no responding	0
tumor specific responding	3		tumor specific responding	0					no responding	0
tumor specific responding	23		tumor specific responding	0					no responding	0
tumor specific responding	0		tumor specific responding	0					no responding	0
tumor specific responding	0		tumor specific responding	0					no responding	0
tumor specific responding	3		tumor specific responding	0					no responding	0
tumor specific responding	3		tumor specific responding	0					no responding	0
tumor specific responding	1		tumor specific responding	0					no responding	0
tumor specific responding	1		tumor specific responding	0					no responding	0
tumor specific responding	0		tumor specific responding	0					no responding	0
tumor specific responding	0		tumor specific responding	0					no responding	0
tumor specific responding	4		tumor specific responding	0					no responding	0
tumor specific responding	0		tumor specific responding	0					no responding	0
tumor specific responding	0		tumor specific responding	0					no responding	0
tumor specific responding	2		tumor specific responding	0					no responding	0
tumor specific responding	0		tumor specific responding	0					no responding	0
tumor specific responding	4		tumor specific responding	0					no responding	0
tumor specific responding	0		tumor specific responding	0					no responding	0
tumor specific responding	1		tumor specific responding	0					no responding	0
tumor specific responding	0		tumor specific responding	0					no responding	0
tumor specific responding	15		tumor specific responding	0					no responding	0
tumor specific responding	5		tumor specific responding	0					no responding	0
tumor specific responding	5		tumor specific responding	0					no responding	0
tumor specific responding	4		tumor specific responding	0					no responding	0
tumor specific responding	4		tumor specific responding	0					no responding	0
tumor specific responding	4		tumor specific responding	0					no responding	0
tumor specific responding	2		tumor specific responding	0					no responding	0
tumor specific responding	2		tumor specific responding	0					no responding	0
tumor specific responding	1		tumor specific responding	0					no responding	0
tumor specific responding	0		tumor specific responding	0					no responding	0
tumor specific responding	4								no responding	0
normal specific responding	46								no responding	0
normal specific responding	28								no responding	0
normal specific responding	9								no responding	0
normal specific responding	11								no responding	0
normal specific responding	9								no responding	0
normal specific responding	9								no responding	0
normal specific responding	12								no responding	0
normal specific responding	4								no responding	0
normal specific responding	22								no responding	0
normal specific responding	12								no responding	0
normal specific responding	4								no responding	0
normal specific responding	1								no responding	0
normal specific responding	8								no responding	0
normal specific responding	5								no responding	0
normal specific responding	15								no responding	0
normal specific responding	15								no responding	0
normal specific responding	8								no responding	0
normal specific responding	14								no responding	0
normal specific responding	9								no responding	0
normal specific responding	0								no responding	0
normal specific responding	0								no responding	0
normal specific responding	6								no responding	0
normal specific responding	5								no responding	0
normal specific responding	9								no responding	0
normal specific responding	6
normal specific responding	7
normal specific responding	1
normal specific responding	2
normal specific responding	11
normal specific responding	0
normal specific responding	1
normal specific responding	10
normal specific responding	3
normal specific responding	2
normal specific responding	1
normal specific responding	8
normal specific responding	1
normal specific responding	0
normal specific responding	8
normal specific responding	5
normal specific responding	3
normal specific responding	3
normal specific responding	2
normal specific responding	2
normal specific responding	7
normal specific responding	1
normal specific responding	0
normal specific responding	3
normal specific responding	10
normal specific responding	1
normal specific responding	6
normal specific responding	7
normal specific responding	2
normal specific responding	2
normal specific responding	0
normal specific responding	2
normal specific responding	1
normal specific responding	3
normal specific responding	5
normal specific responding	3
normal specific responding	9
normal specific responding	0
normal specific responding	2
normal specific responding	6
normal specific responding	1
normal specific responding	5
normal specific responding	6
normal specific responding	2
normal specific responding	3
normal specific responding	0
normal specific responding	5
normal specific responding	4
normal specific responding	3
normal specific responding	2
normal specific responding	7
normal specific responding	3
normal specific responding	1
normal specific responding	10
normal specific responding	0
normal specific responding	1
normal specific responding	1
normal specific responding	4
normal specific responding	1
normal specific responding	1
normal specific responding	0
normal specific responding	2
normal specific responding	5
normal specific responding	0
normal specific responding	0
normal specific responding	1
normal specific responding	6
normal specific responding	2
normal specific responding	3
normal specific responding	2
normal specific responding	5
normal specific responding	1
normal specific responding	0
normal specific responding	0
normal specific responding	0
normal specific responding	0
normal specific responding	2
normal specific responding	0
normal specific responding	6
normal specific responding	2
normal specific responding	0
normal specific responding	0
normal specific responding	1
normal specific responding	3
normal specific responding	0
normal specific responding	0
normal specific responding	2
normal specific responding	0
normal specific responding	6
normal specific responding	3
normal specific responding	2
normal specific responding	3
normal specific responding	3
normal specific responding	0
normal specific responding	2
normal specific responding	2
normal specific responding	0
normal specific responding	0
normal specific responding	1
normal specific responding	4
normal specific responding	4
normal specific responding	0
normal specific responding	8
normal specific responding	1
normal specific responding	2
normal specific responding	4
normal specific responding	0
normal specific responding	1
normal specific responding	3
normal specific responding	4
normal specific responding	1
normal specific responding	0
normal specific responding	1
normal specific responding	1
normal specific responding	0
normal specific responding	1
normal specific responding	2
normal specific responding	1
normal specific responding	0
normal specific responding	0
normal specific responding	4
normal specific responding	0
normal specific responding	1
normal specific responding	2
normal specific responding	1
normal specific responding	1
normal specific responding	1
normal specific responding	2
normal specific responding	1
normal specific responding	1
normal specific responding	0
normal specific responding	1
normal specific responding	0
normal specific responding	1
normal specific responding	0
normal specific responding	0
normal specific responding	3
normal specific responding	1
normal specific responding	2
normal specific responding	3
normal specific responding	3
normal specific responding	12
normal specific responding	9
normal specific responding	4
normal specific responding	4
normal specific responding	8
normal specific responding	3
normal specific responding	10
normal specific responding	7
normal specific responding	4
normal specific responding	22
normal specific responding	2
normal specific responding	5
normal specific responding	2
normal specific responding	0
normal specific responding	1
normal specific responding	5
normal specific responding	1
normal specific responding	1
normal specific responding	2
normal specific responding	1
normal specific responding	0
normal specific responding	0
normal specific responding	3
normal specific responding	6
normal specific responding	9
normal specific responding	7
normal specific responding	1
normal specific responding	0
normal specific responding	4
normal specific responding	39
normal specific responding	5
normal specific responding	23
normal specific responding	28
normal specific responding	22
normal specific responding	24
normal specific responding	7
normal specific responding	12
normal specific responding	12
normal specific responding	3
normal specific responding	2
normal specific responding	1
normal specific responding	76
normal specific responding	28
normal specific responding	25
normal specific responding	2
normal specific responding	4
normal specific responding	19
normal specific responding	0
normal specific responding	18
no responding	38
no responding	39
no responding	24
no responding	13
no responding	23
no responding	33
no responding	33
no responding	30
no responding	10
no responding	3
no responding	3
no responding	13
no responding	24
no responding	1
no responding	16
no responding	20
no responding	17
no responding	9
no responding	3
no responding	0
no responding	15
no responding	15
no responding	17
no responding	4
no responding	15
no responding	1
no responding	1
no responding	14
no responding	12
no responding	12
no responding	14
no responding	10
no responding	18
no responding	1
no responding	9
no responding	11
no responding	5
no responding	1
no responding	15
no responding	7
no responding	11
no responding	4
no responding	2
no responding	5
no responding	3
no responding	1
no responding	7
no responding	3
no responding	10
no responding	2
no responding	1
no responding	10
no responding	5
no responding	2
no responding	9
no responding	6
no responding	0
no responding	1
no responding	10
no responding	4
no responding	1
no responding	10
no responding	9
no responding	6
no responding	8
no responding	3
no responding	0
no responding	4
no responding	0
no responding	8
no responding	1
no responding	2
no responding	4
no responding	6
no responding	0
no responding	2
no responding	4
no responding	1
no responding	3
no responding	7
no responding	2
no responding	9
no responding	5
no responding	0
no responding	7
no responding	5
no responding	1
no responding	5
no responding	5
no responding	9
no responding	3
no responding	0
no responding	7
no responding	7
no responding	4
no responding	2
no responding	0
no responding	6
no responding	0
no responding	5
no responding	1
no responding	5
no responding	2
no responding	7
no responding	3
no responding	9
no responding	6
no responding	1
no responding	7
no responding	7
no responding	0
no responding	9
no responding	0
no responding	9
no responding	3
no responding	0
no responding	5
no responding	3
no responding	2
no responding	1
no responding	0
no responding	0
no responding	2
no responding	4
no responding	6
no responding	0
no responding	1
no responding	0
no responding	0
no responding	1
no responding	9
no responding	7
no responding	0
no responding	1
no responding	0
no responding	3
no responding	1
no responding	11
no responding	5
no responding	0
no responding	1
no responding	3
no responding	0
no responding	0
no responding	0
no responding	1
no responding	3
no responding	1
no responding	4
no responding	1
no responding	1
no responding	7
no responding	0
no responding	1
no responding	6
no responding	5
no responding	0
no responding	0
no responding	0
no responding	5
no responding	4
no responding	0
no responding	0
no responding	1
no responding	2
no responding	2
no responding	2
no responding	0
no responding	0
no responding	3
no responding	0
no responding	0
no responding	1
no responding	0
no responding	6
no responding	1
no responding	2
no responding	3
no responding	0
no responding	0
no responding	1
no responding	0
no responding	0
no responding	0
no responding	1
no responding	2
no responding	5
no responding	2
no responding	0
no responding	1
no responding	0
no responding	3
no responding	0
no responding	3
no responding	1
no responding	0
no responding	4
no responding	4
no responding	5
no responding	4
no responding	3
no responding	2
no responding	3
no responding	6
no responding	3
no responding	1
no responding	1
no responding	1
no responding	2
no responding	4
no responding	0
no responding	3
no responding	0
no responding	1
no responding	1
no responding	4
no responding	2
no responding	2
no responding	4
no responding	0
no responding	1
no responding	4
no responding	4
no responding	3
no responding	0
no responding	3
no responding	3
no responding	3
no responding	1
no responding	0
no responding	0
no responding	0
no responding	2
no responding	1
no responding	0
no responding	2
no responding	2
no responding	1
no responding	3
no responding	1
no responding	2
no responding	0
no responding	3
no responding	0
no responding	4
no responding	0
no responding	6
no responding	0
no responding	5
no responding	0
no responding	4
no responding	0
no responding	0
no responding	1
no responding	3
no responding	3
no responding	1
no responding	0
no responding	1
no responding	0
no responding	0
no responding	0
no responding	0
no responding	0
no responding	5
no responding	1
no responding	2
no responding	1
no responding	0
no responding	2
no responding	5
no responding	2
no responding	2
no responding	1
no responding	0
no responding	0
no responding	3
no responding	0
no responding	0
no responding	2
no responding	1
no responding	0
no responding	0
no responding	0
no responding	1
no responding	0
no responding	0
no responding	0
no responding	0
no responding	2
no responding	1
no responding	1
no responding	1
no responding	0
no responding	0
no responding	0
no responding	2
no responding	3
no responding	0
no responding	1
no responding	2
no responding	1
no responding	3
no responding	0
no responding	1
no responding	1
no responding	0
no responding	1
no responding	1
no responding	1
no responding	1
no responding	0
no responding	0
no responding	0
no responding	0
no responding	1
no responding	0
no responding	1
no responding	1
no responding	1
no responding	3
no responding	0
no responding	0
no responding	1
no responding	0
no responding	1
no responding	3
no responding	0
no responding	2
no responding	0
no responding	0
no responding	0
no responding	1
no responding	1
no responding	1
no responding	0
no responding	0
no responding	0
no responding	2
no responding	0
no responding	0
no responding	0
no responding	3
no responding	0
no responding	0
no responding	0
no responding	0
no responding	11
no responding	5
no responding	16
no responding	2
no responding	3
no responding	26
no responding	27
no responding	2
no responding	11
no responding	20
no responding	0
no responding	0
no responding	4
no responding	2
no responding	7
no responding	4
no responding	1
no responding	3
no responding	0
no responding	0
no responding	1
no responding	0
no responding	6
no responding	21
no responding	0
no responding	0
no responding	0
no responding	0
no responding	0
no responding	0
no responding	0
no responding	0
no responding	0
no responding	0
no responding	0
no responding	0
no responding	13
no responding	3
no responding	12
no responding	2
no responding	4
no responding	3
no responding	8
no responding	9
no responding	6
no responding	6
no responding	0
no responding	2
no responding	9
no responding	0
no responding	0
no responding	9
no responding	4
no responding	5
no responding	3
no responding	8
no responding	3
no responding	4
no responding	4
no responding	4
no responding	4
no responding	1
no responding	2
no responding	5
no responding	3
no responding	1
no responding	8
no responding	5
no responding	1
no responding	2
no responding	1
no responding	8
no responding	9
no responding	2
no responding	8
no responding	1
no responding	2
no responding	4
no responding	2
divergent responding	10
divergent responding	37
divergent responding	17
divergent responding	4
divergent responding	55
divergent responding	52
divergent responding	52
divergent responding	38
divergent responding	38
divergent responding	16
divergent responding	3
divergent responding	28
divergent responding	15
divergent responding	21
divergent responding	35
divergent responding	6
divergent responding	44
divergent responding	14
divergent responding	12
divergent responding	30
divergent responding	24
divergent responding	15
divergent responding	34
divergent responding	7
divergent responding	31
divergent responding	26
divergent responding	1
divergent responding	4
divergent responding	15
divergent responding	7
divergent responding	16
divergent responding	9
divergent responding	9
divergent responding	8
divergent responding	25
divergent responding	9
divergent responding	14
divergent responding	8
divergent responding	8
divergent responding	31
divergent responding	22
divergent responding	20
divergent responding	2
divergent responding	4
divergent responding	14
divergent responding	3
divergent responding	9
divergent responding	19
divergent responding	19
divergent responding	11
divergent responding	8
divergent responding	4
divergent responding	8
divergent responding	3
divergent responding	8
divergent responding	9
divergent responding	10
divergent responding	4
divergent responding	14
divergent responding	10
divergent responding	8
divergent responding	8
divergent responding	0
divergent responding	5
divergent responding	6
divergent responding	12
divergent responding	5
divergent responding	9
divergent responding	2
divergent responding	5
divergent responding	9
divergent responding	3
divergent responding	11
divergent responding	2
divergent responding	5
divergent responding	6
divergent responding	3
divergent responding	6
divergent responding	13
divergent responding	5
divergent responding	4
divergent responding	5
divergent responding	5
divergent responding	2
divergent responding	5
divergent responding	2
divergent responding	2
divergent responding	2
divergent responding	7
divergent responding	3
divergent responding	4
divergent responding	5
divergent responding	5
divergent responding	2
divergent responding	4
divergent responding	7
divergent responding	3
divergent responding	0
divergent responding	3
divergent responding	2
divergent responding	12
divergent responding	3
divergent responding	6
divergent responding	10
divergent responding	3
divergent responding	7
divergent responding	2
divergent responding	0
divergent responding	8
divergent responding	2
divergent responding	3
divergent responding	1
divergent responding	8
divergent responding	0
divergent responding	0
divergent responding	0
divergent responding	0
divergent responding	2
divergent responding	2
divergent responding	6
divergent responding	4
divergent responding	4
divergent responding	3
divergent responding	1
divergent responding	0
divergent responding	2
divergent responding	0
divergent responding	3
divergent responding	4
divergent responding	1
divergent responding	4
divergent responding	6
divergent responding	2
divergent responding	1
divergent responding	3
divergent responding	2
divergent responding	1
divergent responding	1
divergent responding	5
divergent responding	4
divergent responding	1
divergent responding	1
divergent responding	0
divergent responding	2
divergent responding	3
divergent responding	2
divergent responding	0
divergent responding	1
divergent responding	2
divergent responding	2
divergent responding	2
divergent responding	0
divergent responding	2
divergent responding	0
divergent responding	2
divergent responding	4
divergent responding	7
divergent responding	0
divergent responding	1
divergent responding	2
divergent responding	0
divergent responding	0
divergent responding	2
divergent responding	1
divergent responding	3
divergent responding	0
divergent responding	1
divergent responding	1
divergent responding	0
divergent responding	1
divergent responding	0
divergent responding	18
divergent responding	20
divergent responding	27
divergent responding	15
divergent responding	11
divergent responding	21
divergent responding	19
divergent responding	21
divergent responding	17
divergent responding	12
divergent responding	3
divergent responding	11
divergent responding	2
divergent responding	3
divergent responding	2
divergent responding	3
divergent responding	3
divergent responding	7
divergent responding	15
divergent responding	23
divergent responding	0
divergent responding	1
divergent responding	0
divergent responding	22
divergent responding	7
divergent responding	1
divergent responding	2
divergent responding	0
divergent responding	0
divergent responding	1
divergent responding	5
divergent responding	0
divergent responding	1
divergent responding	2
divergent responding	2
divergent responding	1
divergent responding	1
divergent responding	1
divergent responding	0
divergent responding	1
divergent responding	0
divergent responding	0
divergent responding	6
divergent responding	0
divergent responding	0
divergent responding	1
divergent responding	6
divergent responding	9
divergent responding	6
divergent responding	4
divergent responding	5
divergent responding	10
divergent responding	0
divergent responding	6
divergent responding	11
divergent responding	3
divergent responding	1
divergent responding	7
divergent responding	3
divergent responding	5
divergent responding	2
divergent responding	8
divergent responding	4
divergent responding	7
divergent responding	10
divergent responding	5
divergent responding	1
divergent responding	5
divergent responding	1
consistent responding	2
consistent responding	10
consistent responding	4
consistent responding	5
consistent responding	2
consistent responding	4
consistent responding	4
consistent responding	2
consistent responding	7
consistent responding	0
consistent responding	0
consistent responding	2
consistent responding	2
consistent responding	0
consistent responding	0
consistent responding	0
consistent responding	3
consistent responding	1
consistent responding	0
consistent responding	2
consistent responding	3
consistent responding	5
consistent responding	2
consistent responding	0
consistent responding	3
consistent responding	1
