# Supplementary material for: Systematic Analysis of Time-Series Gene Expression Data on Tumor Cell-Selective Apoptotic Responses to HDAC Inhibitors
Source: Comput Math Methods Med. 2014 Oct 13;2014:867289. doi: 10.1155/2014/867289 (PMC4211306; doi:10.1155/2014/867289)
Supplement: Supplementary file 1 — Table S1. H-score of all pathways for tumor and normal samples: This table lists the name, category, website and H-score values for all 1307 pathway. Table S2. Illustrative pathways belonging to term "No responding": This table lists the name, category, website and TVPC patterns for "No responding" pathways. Table S3. Illustrative pathways belonging to term "Consistent responding": This table lists the name, category, website and TVPC patterns for "Consistent responding" pathways. Table S4. Illustrative pathways belonging to term "Tumor specific responding": This table lists the name, category, website and TVPC patterns for "Tumor specific responding" pathways. Table S5. Illustrative pathways belonging to term "Normal specific responding": This table lists the name, category, web site and TVPC patterns for "Normal specific responding" pathways. Table S6. Illustrative pathways belonging to term "Divergent responding": This table lists the name, category, website and TVPC patterns for "Divergent responding" pathways. Table S7. Genes within profile #0 for normal samples: This table contains all genes within profile #0 for normal samples, and lists the normalized expression data to the right of gene symbol. Table S8. Genes within profile #2 for normal samples: This table contains all genes within profile #2 for normal samples, and lists the normalized expression data to the right of gene symbol. Table S9. Genes within profile #9 for normal samples: This table contains all genes within profile #9 for normal samples, and lists the normalized expression data to the right of gene symbol. Table S10. Genes within profile #12 for normal samples: This table contains all genes within profile # 12 for normal samples, and lists the normalized expression data to the right of gene symbol. Table S11. Genes within profile #14 for normal samples: This table contains all genes within profile #14 for normal samples, and lists the normalized expression data to the right of gene symbol. Ta [file 867289.f1.zip › 867289.f1/Table S3.xls]

## Sheet: Sheet1
Pathway name	Categories	NO.all	NO.in	Web site	Pattern-tumor	Pattern-normal	Term	OMIC gene counts
GO GTPASE ACTIVITY	Molecular function	99	88	http://www.broadinstitute.org/gsea/msigdb/cards/GTPASE_ACTIVITY	0111	0111	consistent responding	4
GO RIBOSOME	Cellular component	39	39	http://www.broadinstitute.org/gsea/msigdb/cards/RIBOSOME	0111	0111	consistent responding	0
GO ORGANELLAR RIBOSOME	Cellular component	22	22	http://www.broadinstitute.org/gsea/msigdb/cards/ORGANELLAR_RIBOSOME	0111	0111	consistent responding	0
GO MITOCHONDRIAL RIBOSOME	Cellular component	22	22	http://www.broadinstitute.org/gsea/msigdb/cards/MITOCHONDRIAL_RIBOSOME	0111	0111	consistent responding	0
GO ALCOHOL METABOLIC PROCESS	Biological process	88	84	http://www.broadinstitute.org/gsea/msigdb/cards/ALCOHOL_METABOLIC_PROCESS	1110	1110	consistent responding	2
BIOCARTA TALL1 PATHWAY	Cell Activation-Immunology	15	15	http://www.broadinstitute.org/gsea/msigdb/cards/BIOCARTA_TALL1_PATHWAY	1100	1100	consistent responding	1
GO PHOSPHOLIPID METABOLIC PROCESS	Biological process	74	63	http://www.broadinstitute.org/gsea/msigdb/cards/PHOSPHOLIPID_METABOLIC_PROCESS	1000	1000	consistent responding	2
GO PROTEIN AMINO ACID N LINKED GLYCOSYLATION	Biological process	30	28	http://www.broadinstitute.org/gsea/msigdb/cards/PROTEIN_AMINO_ACID_N_LINKED_GLYCOSYLATION	1000	1000	consistent responding	2
GO POSITIVE REGULATION OF PROTEIN AMINO ACID PHOSPHORYLATION	Biological process	20	18	http://www.broadinstitute.org/gsea/msigdb/cards/POSITIVE_REGULATION_OF_PROTEIN_AMINO_ACID_PHOSPHORYLATION	1000	1000	consistent responding	3
KEGG N GLYCAN BIOSYNTHESIS	Metabolism	46	42	http://www.broadinstitute.org/gsea/msigdb/cards/KEGG_N_GLYCAN_BIOSYNTHESIS	1000	1000	consistent responding	1
KEGG NITROGEN METABOLISM	Metabolism	23	23	http://www.broadinstitute.org/gsea/msigdb/cards/KEGG_NITROGEN_METABOLISM	1000	1000	consistent responding	0
BIOCARTA MYOSIN PATHWAY	Cell Signaling	31	30	http://www.broadinstitute.org/gsea/msigdb/cards/BIOCARTA_MYOSIN_PATHWAY	1000	1000	consistent responding	2
BIOCARTA STRESS PATHWAY	Cell Signaling – Cytokines/Chemokines	25	24	http://www.broadinstitute.org/gsea/msigdb/cards/BIOCARTA_STRESS_PATHWAY	1000	1000	consistent responding	3
BIOCARTA 41BB PATHWAY	Cell Activation-Cell Signaling-immunology	17	17	http://www.broadinstitute.org/gsea/msigdb/cards/BIOCARTA_41BB_PATHWAY	1000	1000	consistent responding	2
BIOCARTA GATA3 PATHWAY	Cytokines/Chemokines-Expression-Immunology	16	15	http://www.broadinstitute.org/gsea/msigdb/cards/BIOCARTA_GATA3_PATHWAY	1000	1000	consistent responding	3
GO PROTEIN AMINO ACID AUTOPHOSPHORYLATION	Biological process	31	27	http://www.broadinstitute.org/gsea/msigdb/cards/PROTEIN_AMINO_ACID_AUTOPHOSPHORYLATION	0110	0110	consistent responding	2
GO AMINE TRANSMEMBRANE TRANSPORTER ACTIVITY	Molecular function	41	41	http://www.broadinstitute.org/gsea/msigdb/cards/AMINE_TRANSMEMBRANE_TRANSPORTER_ACTIVITY	0100	0100	consistent responding	0
GO AMINE METABOLIC PROCESS	Biological process	141	135	http://www.broadinstitute.org/gsea/msigdb/cards/AMINE_METABOLIC_PROCESS	0010	0010	consistent responding	2
GO TISSUE DEVELOPMENT	Biological process	138	131	http://www.broadinstitute.org/gsea/msigdb/cards/TISSUE_DEVELOPMENT	0010	0010	consistent responding	10
GO GOLGI APPARATUS PART	Cellular component	100	85	http://www.broadinstitute.org/gsea/msigdb/cards/GOLGI_APPARATUS_PART	0010	0010	consistent responding	5
GO ECTODERM DEVELOPMENT	Biological process	80	76	http://www.broadinstitute.org/gsea/msigdb/cards/ECTODERM_DEVELOPMENT	0010	0010	consistent responding	4
GO EPIDERMIS DEVELOPMENT	Biological process	71	68	http://www.broadinstitute.org/gsea/msigdb/cards/EPIDERMIS_DEVELOPMENT	0010	0010	consistent responding	4
GO REGULATION OF BINDING	Biological process	58	51	http://www.broadinstitute.org/gsea/msigdb/cards/REGULATION_OF_BINDING	0010	0010	consistent responding	7
GO AMINO SUGAR METABOLIC PROCESS	Biological process	19	18	http://www.broadinstitute.org/gsea/msigdb/cards/AMINO_SUGAR_METABOLIC_PROCESS	0010	0010	consistent responding	0
BIOCARTA EPO PATHWAY	Cell Signaling – Cytokines/Chemokines - Hematopoiesis – Immunology	19	19	http://www.broadinstitute.org/gsea/msigdb/cards/BIOCARTA_EPO_PATHWAY	0010	0010	consistent responding	5
BIOCARTA LAIR PATHWAY	Immunology	17	16	http://www.broadinstitute.org/gsea/msigdb/cards/BIOCARTA_LAIR_PATHWAY	0001	0001	consistent responding	0

## Sheet: Sheet2
4	0001	1110	divergent responding	1				419.38		182.36
4	0001	1110	divergent responding	1				0.062688		4.9726
4	0001	1110	divergent responding	1				-0.542		7.5362
4	0011	1100	divergent responding	1				-0.3354		40.207
4	0001	1110	divergent responding	1				-0.023519		1.959
4	0001	1110	divergent responding	1				-1.5505		14.875
4	0001	1110	divergent responding	1				-0.066231		1.2612
4	0100	1011	divergent responding	1				-2.9046		201.15
4	0001	1110	divergent responding	1				-0.22528		13.078
4	0010	1101	divergent responding	1				-0.95728		3.9199
3	0100	0011	divergent responding	0				39.099		26.132
3	1001	0010	divergent responding	-1				52.804		59.667
3	1001	0010	divergent responding	-1				-0.012442		2.9921
3	1101	0110	divergent responding	-1				92.093		17.603
3	0001	0110	divergent responding	0				-0.07927		2.9768
3	1011	0110	divergent responding	-1				-0.092464		48.672
3	1110	0011	divergent responding	-1				-12.796		94.46
3	1001	0010	divergent responding	-1				1.8612		17.433
3	1001	0010	divergent responding	-1				111.19		3.1077
3	1001	1110	divergent responding	0				105.67		4.601
3	1011	1100	divergent responding	0				-1.1642		38.738
3	0110	0001	divergent responding	0				16.931		125.6
3	0001	0110	divergent responding	0				21.87		155.22
3	1001	1110	divergent responding	0				9.1806		19.94
3	0001	1010	divergent responding	1				-2.2031		3.6996
3	0110	1011	divergent responding	1				-0.00010739		0.096016
3	0110	0001	divergent responding	0				0.13489		2.4984
3	0001	1100	divergent responding	1				1.906		6.7217
3	0011	1000	divergent responding	1				-13.295		187.24
3	1100	0010	divergent responding	-1				0.46584		0.7995
3	0001	1010	divergent responding	1				6.4298		4.0639
3	0110	1000	divergent responding	1				28.505		26.675
3	1010	0001	divergent responding	-1				-0.1243		0.091855
3	0101	1011	divergent responding	1				-0.072861		0.20984
3	1011	0101	divergent responding	-1				138.43		93.966
3	1010	0100	divergent responding	-1				-0.1164		2.5827
3	1010	0100	divergent responding	-1				5.7037		28.077
3	0001	1100	divergent responding	1				-22.295		3.8699
3	0001	1100	divergent responding	1				1.8118		24.834
3	1000	0011	divergent responding	-1				1.5955		27.512
3	0010	1100	divergent responding	1				0.15792		0.82294
3	0010	1100	divergent responding	1				-1.6377		56.626
3	0101	1000	divergent responding	1				-6.0519		3.4041
3	1000	0011	divergent responding	-1				-0.023603		0.23617
3	0001	0110	divergent responding	0				-4.8053		11.764
3	0001	0110	divergent responding	0				-22.081		1.3197
3	1001	0111	divergent responding	-1				-1.5377		2.3824
3	1001	0010	divergent responding	-1				33.858		32.944
3	1100	0001	divergent responding	-1				-0.35388		0.32667
3	0101	0010	divergent responding	0				89.562		120.71
3	0101	0010	divergent responding	0				-8.8596		108.12
3	0100	0011	divergent responding	0				-0.0077766		3.4203
3	1000	0101	divergent responding	-1				-0.0042748		4.0131
3	0011	1000	divergent responding	1				-0.0082917		0.85374
3	0010	1100	divergent responding	1				0.48434		9.1174
3	1001	0100	divergent responding	-1				-12.372		-0.0012478
2	1001	0011	divergent responding	-1				3.6762		10.233
2	0100	0001	divergent responding	0				0.042542		-1.2255
2	1000	0010	divergent responding	-1				4.0321		6.7369
2	1011	1000	divergent responding	0				0.016255		8.7311
2	0001	1011	divergent responding	1				-0.15053		-0.00029003
2	0001	0010	divergent responding	0				0.0027191		-1.0532
2	1000	0010	divergent responding	-1				0.2682		-1.348
2	1101	0111	divergent responding	-1				18.568		46.8
2	0001	0100	divergent responding	0				-0.16879		53.14
2	1000	0010	divergent responding	-1				55.272		84.013
2	1000	0001	divergent responding	-1				7.3921		0.69832
2	0001	0100	divergent responding	0				0.41286		-0.34906
2	1000	1110	divergent responding	0				-0.66629		25.223
2	1000	0100	divergent responding	-1				59.255		78.37
2	0001	1000	divergent responding	1				-0.63312		2.7044
2	0010	1110	divergent responding	1				-0.51161		0.0046807
2	1110	0010	divergent responding	-1				4.5414		1.7164
2	1000	0100	divergent responding	-1				-0.61141		26.822
2	0001	0010	divergent responding	0				-0.29461		1.5161
2	0010	1110	divergent responding	1				-0.31748		2.4099
2	1000	0001	divergent responding	-1				2.9971		5.9233
2	1000	0001	divergent responding	-1				0.52808		1.9701
2	1000	0100	divergent responding	-1				0.15948		0.00059413
2	1000	0001	divergent responding	-1				60.422		52.372
2	0111	1101	divergent responding	1				0.71949		28.125
2	0010	1110	divergent responding	1				0.22069		10.085
2	1010	0110	divergent responding	-1				-0.68368		21.926
2	1000	1011	divergent responding	0				1.5134		0.19694
2	0001	1000	divergent responding	1				-0.085865		-0.061898
2	1110	0010	divergent responding	-1				-0.25964		9.8936
2	0100	1110	divergent responding	1				1.8089		4.835
2	1000	0001	divergent responding	-1				0.16026		19.99
2	1000	0010	divergent responding	-1				-3.3405		1.6851
2	0010	1110	divergent responding	1				1.8357		18.601
2	0100	0010	divergent responding	0				-0.51354		17.242
2	1000	0100	divergent responding	-1				-0.26385		21.201
2	1000	1110	divergent responding	0				-0.20964		13.75
2	1000	0010	divergent responding	-1				0.8627		4.4952
2	1000	0010	divergent responding	-1				-0.37831		1.8925
2	0001	1101	divergent responding	1				-0.20421		5.2726
2	0010	0100	divergent responding	0				-0.088682		4.1267
2	0010	1110	divergent responding	1				0.70668		10.405
2	0001	0100	divergent responding	0				1.6227		2.9561
2	0010	1110	divergent responding	1				2.0454		-0.26162
2	1000	0010	divergent responding	-1				2.0454		-0.26162
2	1000	0010	divergent responding	-1				0.022493		1.6547
2	1000	0010	divergent responding	-1				0.97177		-0.1849
2	1110	1000	divergent responding	0				-0.51508		2.209
2	1000	0010	divergent responding	-1				-1.4826		-0.67796
2	1000	0100	divergent responding	-1				-1.6565		39.667
2	0001	1000	divergent responding	1				-0.29416		-0.26831
2	0001	1000	divergent responding	1				-0.99199		1.5271
2	0001	0010	divergent responding	0				-2.7542		26.198
2	0010	0001	divergent responding	0				-0.084439		0.92755
2	1010	0110	divergent responding	-1				9.4582		4.9617
2	1011	1110	divergent responding	0				3.0048		18.488
2	1000	0010	divergent responding	-1				-0.03297		0.65128
2	1000	0001	divergent responding	-1				0.16777		0.3121
2	0001	0010	divergent responding	0				0.69249		34.478
2	1000	0100	divergent responding	-1				0.23542		20.245
2	1000	0001	divergent responding	-1				-0.50038		9.7947
2	0100	1110	divergent responding	1				-0.19532		24.135
2	0100	0001	divergent responding	0				0.040053		1.2627
2	0100	0001	divergent responding	0				0.26847		5.8587
2	0100	0001	divergent responding	0				1.8354		3.5633
2	0001	0010	divergent responding	0				-0.074386		0.039062
2	0010	0001	divergent responding	0				0.93882		17.727
2	1000	0001	divergent responding	-1				-0.20773		0.50537
2	0010	1110	divergent responding	1				0.0028893		16.542
2	0100	0111	divergent responding	0				-0.57378		5.6807
2	0010	0100	divergent responding	0				-0.062367		1.0609
2	1000	0010	divergent responding	-1				-0.1934		0.64742
2	0100	0010	divergent responding	0				-0.0030947		0.00054294
2	1000	0010	divergent responding	-1				-0.72339		9.9492
2	1000	0100	divergent responding	-1				4.2475		1.7723
2	0010	0001	divergent responding	0				1.5658		6.4333
2	0010	1000	divergent responding	1				13.137		0.026539
2	1000	0010	divergent responding	-1				0.15015		8.8739
2	1000	0010	divergent responding	-1				2.7108		12.244
2	0010	0100	divergent responding	0				-1.7036		1.243
2	0001	1000	divergent responding	1				-2.9339		3.8516
2	0001	0111	divergent responding	0				7.5242		12.823
2	0100	0111	divergent responding	0				0.65774		1.589
2	0001	0100	divergent responding	0				-0.24335		-0.038512
2	0001	1000	divergent responding	1				-0.21631		1.9168
2	0010	0001	divergent responding	0				-0.32201		6.2639
2	1000	0100	divergent responding	-1				0.70084		0.00046674
2	0001	0010	divergent responding	0				0.073071		0.35476
2	0010	1000	divergent responding	1				-0.23962		0.10387
2	0001	1000	divergent responding	1				1.9055		1.6799
2	1000	0100	divergent responding	-1				-1.3537		16.061
2	1000	0100	divergent responding	-1				36.219		4.8229
2	0001	1000	divergent responding	1				-3.654		3.4698
2	1000	0100	divergent responding	-1				5.3634		2.9336
2	0010	1000	divergent responding	1				-0.26547		10.969
2	1000	0100	divergent responding	-1				4.1834		29.231
2	0111	0010	divergent responding	0				8.4552		5.3456
2	1011	1000	divergent responding	0				0.27581		6.2618
2	0100	1000	divergent responding	1				-0.18642		-0.52287
2	1110	1000	divergent responding	0				-0.52625		35.994
2	0100	0010	divergent responding	0				24.423		3.2153
2	0100	0111	divergent responding	0				6.9802		5.0948
2	1110	0010	divergent responding	-1				5.837		23.543
2	0010	0001	divergent responding	0				-0.34282		0.079713
2	0001	1000	divergent responding	1				-0.023799		-0.99843
2	0001	1000	divergent responding	1				-1.3785		-0.048121
2	0100	1000	divergent responding	1				1.0175		28.378
2	0001	1000	divergent responding	1				-0.50547		33.695
2	0100	0010	divergent responding	0				-0.32011		0.37633
2	0001	1011	divergent responding	1				-0.87353		94.798
2	1000	0010	divergent responding	-1				0.098642		-0.37164
2	0010	0100	divergent responding	0				-0.61181		26.32
2	0010	0100	divergent responding	0				6.8915		6.3079
2	1000	1110	divergent responding	0				0.00022717		6.1633
2	0100	1000	divergent responding	1				4.0687		4.832
2	0001	0100	divergent responding	0				0.040409		0.28307
2	0001	0111	divergent responding	0				-0.33641		33.735
2	0001	0010	divergent responding	0				0.0038717		1.8089
2	0010	1000	divergent responding	1				-0.0045673		9.2328
2	0100	0111	divergent responding	0				0.013455		7.4246
2	1000	0001	divergent responding	-1				0.00054974		2.5375
2	1000	0010	divergent responding	-1				-1.4407		3.5052
2	1000	0100	divergent responding	-1				-0.43702		0.31048
2	1011	0010	divergent responding	-1				0.97724		9.305
2	1011	0010	divergent responding	-1				0.0057998		2.7835
2	1110	0111	divergent responding	-1				-0.60703		0.0015352
2	0010	1000	divergent responding	1				27.433		4.1695
2	1000	0100	divergent responding	-1				0.31379		11.027
2	0010	1000	divergent responding	1				-0.9547		3.5742
2	1011	0111	divergent responding	-1				-0.096327		14.444
2	0001	0100	divergent responding	0				-0.94226		0.01522
1	0101	0111	divergent responding	0				2.7995		10.799
1	1010	0010	divergent responding	-1				0.91614		-0.070955
1	1010	1000	divergent responding	0				1.9804		0.0017994
1	1010	1000	divergent responding	0				0.54398		0.002666
1	1100	1101	divergent responding	0				-0.15667		-0.41395
1	0101	0111	divergent responding	0				0.42953		0.0080253
1	1010	1110	divergent responding	0				-0.05437		-0.53676
1	1000	1010	divergent responding	0				6.9641		0.8268
1	0011	0010	divergent responding	0				1.9843		0.40303
1	0001	0101	divergent responding	0				0.52657		0.056247
1	1001	0001	divergent responding	-1				-1.5139		0.075073
1	1000	1010	divergent responding	0				0.87343		14.908
1	0010	0011	divergent responding	0				-0.54408		4.2187
1	1010	0010	divergent responding	-1				-1.0134		2.4305
1	0101	0111	divergent responding	0				-0.54408		4.2187
1	1010	1000	divergent responding	0				-1.0134		2.4305
1	0011	0010	divergent responding	0				-0.22266		-0.22302
1	0110	0010	divergent responding	0				0.00028395		10.003
1	0110	0100	divergent responding	0				-0.0036789		8.5252
1	1100	1000	divergent responding	0				29.961		11.182
1	0011	0010	divergent responding	0				0.018456		-0.48352
1	0011	0010	divergent responding	0				12.194		2.7308
1	0110	0100	divergent responding	0				-0.89096		17.405
1	0100	0110	divergent responding	0				-0.10245		0.58242
1	0001	0101	divergent responding	0				0.076149		0.035876
1	0011	0001	divergent responding	0				0.52781		-0.061383
1	1000	1010	divergent responding	0				0.066028		18.781
1	0001	0101	divergent responding	0				-0.18787		0.69402
1	1010	1000	divergent responding	0				-0.18787		0.69402
1	0101	0100	divergent responding	0				2.0009		5.7656
1	0101	0001	divergent responding	0				0.00023734		-0.36877
1	0101	0111	divergent responding	0				12.847		5.8351
1	1000	1100	divergent responding	0				5.1406		0.44685
1	1100	1000	divergent responding	0				0.15047		-0.0087969
1	1011	1010	divergent responding	0				6.4336		-0.50231
1	0100	0110	divergent responding	0				-0.76008		-0.048499
1	0101	0111	divergent responding	0				0.9694		3.6291
1	1001	1000	divergent responding	0				-0.32287		8.2391
1	0010	0011	divergent responding	0				-0.015002		8.6782
1	0100	0101	divergent responding	0				-1.6107		-0.10466
1	0101	0001	divergent responding	0				-1.0561		1.0136
1	0100	1100	divergent responding	1				-0.80859		-0.12054
1	1001	1000	divergent responding	0				-1.0591		11.777
1	0011	0010	divergent responding	0				0.0012559		-0.29209
1	0010	1010	divergent responding	1				0.00086599		4.4811
1	0010	1010	divergent responding	1				-0.5949		-0.87425
1	1000	1100	divergent responding	0				0.1307		4.3409
1	1100	1000	divergent responding	0				-0.44127		-0.81231
1	0011	0010	divergent responding	0				-2.7802		-1.4916
1	0001	0011	divergent responding	0				-0.0032851		1.3983
1	1000	1100	divergent responding	0				-0.97068		-0.13085
1	1000	1100	divergent responding	0				0.37173		2.0744
1	1100	0100	divergent responding	-1				0.01415		0.27179
								0.47872		-0.11276
								0.51321		10.977
								0.51321		10.977
								0.13556		2.4385
								0.26885		4.2591
								-0.011373		11.629
								-1.0779		0.75627
								1.2214		3.3087
								-0.23516		17.12
								0.00092351		19.142
								-26.686		330.33
								9.0593		9.5773
								0.0058324		-1.2523
								-2.5637		0.26452
								0.76632		102.81
								-0.42467		-0.14057
								2.4326		1.859
								11.029		3.2942
								-9.5187		839.33
								3.6145		7.9096
								-0.5661		-0.078674
								3.3921		0.30781
								-0.076951		5.7329
								-0.11337		0.029063
								-0.44977		1.2419
								0.56632		0.68212
								-0.41264		0.54449
								3.9204		1.6568
								5.6373		2.9973
								-1.5582		38.838
								-0.10813		0.10715
								0.23327		0.22664
								-0.10592		8.0163
								1.7852		18.445
								-0.067694		0.63082
								16.629		5.1438
								-5.493		39.076
								-0.55168		24.988
								-0.16977		0.2501
								3.5075		28.293
								-0.066774		0.1802
								-1.2324		5.5073
								-0.27327		0.56781
								0.022348		9.8242
								-0.0056576		3.2633
								13.17		2.9328
								-0.64811		19.407
								0.12078		14.133
								0.17657		6.2824
								1.2693		10.628
								0.0022316		0.2121
								1.7319		14.827
								-3.2226		5.2849
								-0.81604		0.010497
								-0.0013323		0.57754
								9.8595		2.5719
								0.56237		0.42271
								0.19367		0.17935
								-0.54649		4.3555
								-1.7165		1.0593
								0.12968		-0.32691
								-0.11185		-0.02274
								-1.8864		2.15
								-1.2355		0.10502
								0.29003		18.963
								0.13127		8.9528
								-0.70779		3.4504
								0.00096841		1.2805
								1.7254		2.9954
								-1.0213		1.1416
								0.97823		0.68825
								0.020436		0.00067742
								-0.017039		2.9511
								-1.6427		1.4425
								-0.18244		4.4291
								-0.29279		0.017574
								-1.4049		1.9899
								-0.0064586		15.394
								0.026997		1.4488
								-0.45503		0.12105
								-0.28831		0.35236
								0.24294		30.261
								-0.48095		-0.013904
								0.039005		6.8942
								-0.44299		6.2259
								-0.01325		1.1136
								0.013495		-0.0038554
								0.0055665		-0.013118
								-0.012236		0.039004
								1.6496		-0.011406
								-0.73586		-0.1197
								-0.85866		10.468
								-1.5494		1.3131
								-1.8654		-1.1327
								0.10783		-0.63013
								-0.52733		0.25758
								-0.52548		0.18292
								-0.067853		-0.27344
								-1.2922		-2.51e-05
								-0.037025		1.2011
								-1.0922		-0.13145
								-0.87206		-0.18022
								0.70193		25.336
								0.017396		-1.6199
								2.4249		-0.50863
								0.43077		22.527
								-0.61784		0.46304
								-0.24919		0.94074
								-0.41175		-0.27159
								-0.18271		0.33526
								-1.6543		7.827
								-0.38387		-0.24534
								-0.48217		28.373
								-0.98793		0.14609
								-0.77318		-0.95299
								0.51741		3.9217
								-1.436		-0.00049215
								-0.34345		1.9553
								16.056		6.8525
								3.1846		0.070868
								314.25		1091
								39.824		621.38
								39.824		621.38
								32.702		17.217
								423.66		1387.7
								572.88		104.79
								136.31		107.37
								21.307		52.733
								21.307		52.733
								375.4		161.97
								142.18		39.543
								276.79		469.6
								113.31		65.299
								93.93		14.912
								116.07		20.348
								56.596		174.4
								77.404		148.9
								65.065		105.03
								112.56		190.59
								100.43		26.368
								75.186		135.72
								42.616		21.079
								144.86		72.879
								144.86		72.879
								6.1203		5.3629
								16.864		14.952
								13.904		0.89789
								11.695		21.607
								10.717		0.68451
								17.996		4.1637
								339.77		963.69
								16.198		15.706
								100.79		115.04
								790.8		1374
								471.44		821.29
								60.632		130.21
								69.918		40.439
								1.8758		21.134
								13.42		106.47
								447.4		62.79
								65.67		21.342
								242.05		94.323
								-0.11518		44.94
								0.023189		0.93345
								4.5807		23.511
								3.5817		-1.3865
								4.3011		32.027
								1.996		28.533
								4.428		85.375
								38.413		8.7371
								0.0056233		-0.0011703
								5.299		68.581
								0.65364		-0.4071
								0.18582		2.5307
								1.7242		44.444
								98.181		18.524
								98.181		18.524
								1.4576		1.9165
								58.458		7.332
								27.168		0.55487
								-0.017153		-0.013386
								6.1334		8.8804
								0.12371		20.269
								11.559		0.55439
								370.2		47.389
								39.824		1.2493
								42.131		0.18806
								-0.54058		8.6092
								-0.46356		27.708
								62.71		0.37987
								0.0055377		1.6905
								99.713		69.405
								2.8044		0.16057
								0.3811		27.822
								-0.48219		13.375
								3.1e-06		8.3551
								3.0708		0.17941
								-0.0018983		9.1352
								0.90106		2.522
								2.4319		13.803
								0.66763		-0.00052724
								2.0839		21.544
								6.9505		47.406
								4.0889		2.57
								3.9964		-0.048378
								-0.077733		-0.16604
								12.96		4.6891
								5.0715		1.0169
								-0.25357		-0.34052
								138.44		0.7448
								4.81		0.033673
								0.80077		-0.13493
								0.015608		0.080381
								-0.22278		-0.29336
								0.17122		1.4477
								1.3174		2.4944
								-0.72453		8.6063
								2.1391		-0.3183
								32.959		0.41986
								9.1568		1.8963
								-0.018536		0.12079
								1.1084		12.805
								-0.028775		2.9878
								0.0029288		-0.016631
								-0.1785		0.30031
								0.39215		3.4698
								0.11476		-0.059553
								-0.22703		1.2643
								2.5359		0.90022
								3.3		29.948
								1.5062		0.10666
								32.257		8.4591
								2.7399		2.8852
								-0.33528		0.013692
								5.3734		0.72349
								9.4688		1.2279
								0.73979		1.038
								-0.28962		0.75509
								39.879		5.703
								11.577		6.8292
								2.0324		4.0134
								1.3767		-0.0087761
								0.0016595		-0.09367
								4.5802		14.744
								33.031		12.958
								-0.90168		0.2242
								0.50359		-1.5445
								102.68		31.077
								0.82172		-0.36674
								16.342		22.818
								-0.33946		-0.22398
								41.524		6.8039
								120.9		25.031
								0.020891		0.03859
								-0.032711		0.40365
								0.33359		10.018
								46.571		10.222
								18.473		2.9572
								29.683		18.105
								3.2073		6.3377
								1.5337		0.68665
								0.22688		-0.7614
								24.026		0.271
								2.7659		-0.10915
								0.019695		-1.0772
								-0.12515		-0.66415
								-1.0158		-0.71984
								14.389		10.863
								-0.010389		0.011189
								0.55994		0.016333
								4.2376		6.3927
								82.367		17.936
								23.241		0.17818
								-0.098531		-0.88476
								-0.35252		0.068067
								-0.19388		-1.1084
								13.021		-0.46564
								2.8638		0.012723
								0.098186		3.7753
								21.864		-0.30947
								0.76435		-0.17668
								-0.014173		-1.6694
								0.11169		0.47936
								0.002098		-0.55598
								18.918		-0.061694
								0.18253		-0.13086
								-0.66598		-0.0080761
								1.8111		0.18488
								-2.5743		0.057571
								1.4059		2.428
								0.31113		6.9546
								1.9512		0.010002
								1.0899		3.3028
								1.3885		2.6054
								0.012843		0.77996
								33.976		0.93453
								8.0771		14.781
								-0.16064		-0.49437
								10.409		-0.67507
								0.23672		7.368
								-0.62223		20.349
								4.7127		-0.2587
								1.8212		0.021384
								-0.053958		-0.083421
								-0.086678		-0.21304
								0.061184		2.5017
								0.12464		-0.0076472
								0.77981		3.9459
								0.91924		0.76191
								0.47667		0.061696
								0.25479		-0.0032272
								1.064		-0.05264
								0.0062359		-1.1049
								-0.55447		-0.40375
								0.014714		0.023493
								-0.96966		-0.13589
								5.944		-0.0046858
								-0.092415		-0.020504
								33.278		7.4484
								-0.092415		-0.020504
								-0.092415		-0.020504
								0.70329		16.02
								0.081343		1.7217
								7.0259		-0.58526
								-0.91435		-0.5607
								5.7607		0.00010495
								17.642		9.1207
								-0.35517		-0.0611
								6.3124		1.7926
								4.197		12.81
								-0.0022212		2.9221
								4.8277		12.437
								-0.32531		-0.30651
								-0.030186		3.4368
								0.28162		-0.0016483
								0.34589		-0.022039
								4.0571		-0.11793
								1.3077		13.981
								1.4702		84.9
								-0.00058874		0.49143
								27.597		21.179
								-0.00013809		1.2518
								2.3331		29.435
								8.4507		5.6499
								25.052		3.8282
								11.265		7.4717
								-0.83587		2.4183
								0.65268		0.0002121
								10.516		5.297
								49.201		1.3468
								18.479		-0.47443
								29.191		23.035
								-1.8877		-0.69092
								1.7576		4.5401
								2.4676		0.24559
								-0.66699		11.726
								-0.82952		135.09
								12.494		52.969
								-0.0091227		4.4224
								11.057		41.253
								0.48568		11.666
								3.7575		18.088
								0.16612		33.373
								0.11909		32.591
								0.46209		23.519
								-0.39518		6.1031
								-0.02967		8.8707
								5.7299		32.706
								-0.089666		10.32
								26.13		140.11
								116.05		23.289
								26.35		160.39
								0.025179		4.8076
								5.3361		68.898
								22.252		1.858
								55.87		-1.0364
								10.767		1.1013
								18.024		71.195
								7.5016		0.12553
								12.334		50.842
								19.225		1.4045
								17.307		1.0594
								0.010709		-1.3805
								-0.066319		51.829
								5.4706		132.07
								-3.09		0.0046165
								0.90333		-1.3695
								-0.032869		-0.23989
								-0.26977		-0.16267
								3.739		1.0015
								24.096		1.1624
								1.2838		2.1381
								5.3462		6.3632
								-13.015		-1.1666
								3.0302		-0.1036
								-0.73163		-0.13426
								-0.79565		-0.48733
								2.1402		0.92129
								-1.4947		2.121
								-0.80382		-0.35821
								-11.468		-1.8047
								-2.7866		-0.55768
								-0.6762		1.478
								2.388		-0.0003032
								1.6412		-0.044699
								1.7271		5.742
								0.50818		0.62299
								93.18		84.057
								-19.313		-2.1159
								20.045		34.439
								-0.15744		0.010311
								0.098121		-0.50647
								-3.7426		-0.92897
								51.09		35.196
								0.055514		-0.42466
								-0.03671		0.33716
								0.050877		-1.3197
								0.015229		2.1279
								0.096481		-0.068847
								0.63366		-0.13059
								-0.22522		-2.3541
								-0.32621		8.6662
								-3.2746		1.1714
								5.0682		-1.1246
								0.74203		14.5
								0.45511		0.16707
								-0.24663		2.0952
								0.21337		-0.02645
								2040.7		1385.1
								-0.88715		0.5887
								6.075		0.040268
								1.0287		0.50698
								17.341		21.293
								-0.59928		0.31128
								-0.049872		2.791
								-4.7371		-1.1645
								-0.71369		0.059355
								0.31273		-0.032393
								-0.82221		-1.2347
								0.0032218		2.4817
								-1.0189		27.007
								-0.98433		1.3573
								-0.14907		0.94906
								-2.983		3.1075
								0.11252		-0.68145
								-4.8145		-2.0824
								4.0377		-0.003204
								0.10604		-1.313
								153.79		30.202
								0.85894		0.0036352
								6.3296		5.3848
								-0.07028		0.14476
								-4.5696		-4.0185
								-0.015029		-1.4485
								0.19136		-0.85864
								-1.871		0.51538
								4.7157		-0.47344
								83.196		27.688
								17.665		3.6055
								-1.2813		-0.48637
								6.4837		-0.87539
								-2.3504		-0.048266
								18.743		83.68
								-0.0011444		18.907
								0.3409		10.671
								0.4328		0.19834
								0.0039863		-0.034608
								-1.1587		0.094342
								0.30834		1.6696
								-0.06379		0.02782
								-5.3354		8.8291
								-1.3283		0.1115
								-1.3127		2.5364
								-0.47578		-0.15282
								-1.3342		4.0835
								-2.7258		-2.8065
								8.2258		6.6733
								-0.14646		-0.90815
								1.8735		1.0206
								0.30141		2.2307
								1.0017		19.834
								-0.63092		4.0352
								6.5567		1.2333
								0.9341		-1.0885
								-0.028665		-0.013689
								-0.00042392		7.1294
								0.57809		10.468
								-0.025652		-0.091621
								-1.7387		1.1646
								-0.47725		-1.4914
								0.31742		2.7642
								-1.5098		2.0931
								-1.1092		0.028905
								-9.23e-05		1.2991
								-2.9993		0.71928
								0.18972		11.495
								0.61131		9.9703
								-0.75806		2.5298
								1.7603		0.075223
								0.046738		-0.043736
								0.50216		-0.0026113
								-2.5841		0.21932
								-1.5259		-0.11623
								-0.029564		0.40203
								-6.4188		-1.8842
								2.3593		18.448
								4.1471		10.899
								-1.6368		-0.11318
								22.989		20.751
								-0.24477		0.093755
								-2.1114		3.0229
								1.3497		0.37601
								0.095703		-0.28412
								0.070499		8.8419
								0.87133		1.2475
								-0.2054		-1.3413
								-0.28008		17.293
								0.69509		1.5324
								0.15917		-0.052857
								-0.061299		2.5544
								-3.3703		0.010514
								-1.626		4.0767
								-3.1501		-2.3681
								0.026872		-1.2419
								0.073305		-0.19201
								-1.9748		1.3282
								8.1963		0.76921
								-0.13768		0.13315
								23.428		21.226
								-0.36821		0.21437
								-0.30867		-0.85985
								-0.45592		3.9931
								0.075038		8.4827
								0.075038		8.4827
								-0.32089		-1.1845
								0.050468		-0.44479
								-4.4248		0.21668
								-0.76936		-0.98076
								-0.99964		1.1375
								-0.25271		0.57584
								13.387		2.7498
								-0.75639		-0.0094
								-0.38785		5.146
								-0.11657		0.40595
								-0.85613		-0.0090106
								0.48091		-0.14194
								-0.089176		1.8593
								-0.77948		0.62752
								0.014406		7.8292
								13.404		0.21834
								-0.031385		6.0967
								0.65168		15.23
								-2.1242		-0.0030146
								0.0034243		-0.0058641
								0.39754		4.8201
								4.6417		15.842
								7.4813		1.9832
								-0.37338		2.688
								-0.025428		0.0193
								-1.8382		0.023747
								2.0892		16.256
								-0.44408		9.712
								-0.067228		0.069529
								5.8581		2.537
								-0.53564		5.96
								-0.79575		0.056114
								16.674		23.349
								-1.1879		1.0017
								2.192		2.1308
								-0.69484		0.67736
								-0.05085		0.12115
								1.4821		4.7363
								0.54236		-0.043127
								0.43018		-0.55605
								2.5035		-0.0020279
								-0.14565		-0.23231
								-0.50981		1.3157
								-0.070713		-0.056691
								-1.2761		3.8959
								-0.021333		-0.42276
								0.064627		0.00020521
								0.72339		2.0869
								0.33054		1.5767
								0.90361		0.38289
								-0.15107		1.3699
								12.227		2.4642
								-0.16593		1.9916
								-0.32979		-0.77918
								-0.37068		0.68273
								-0.37068		0.68273
								-0.20235		2.15e-05
								-2.2767		0.36341
								-1.1736		8.492
								-1.6583		-0.088498
								-0.80521		-1.3218
								-0.037363		2.0076
								-0.20235		2.15e-05
								2.0162		-0.44546
								-0.091491		1.6192
								-0.6932		-0.2181
								-0.85092		0.49004
								1.1803		0.36722
								-1.0915		-0.11855
								-0.087664		1.4879
								2.4758		4.4631
								14.715		0.66835
								-0.4029		0.85444
								2.7679		1.9828
								-1.0604		0.00017143
								-1.8257		0.14589
								0.0057776		-1.074
								-0.51529		23.043
								0.087818		71.317
								0.0031775		0.014125
								-0.29732		-0.77271
								-0.46828		0.24749
								-0.91103		-0.21922
								0.32559		0.19296
								0.45634		0.00060015
								-0.5934		-0.13205
								-1.1341		-0.17196
								16.84		7.6789
								-0.0013537		-1.0171
								-0.42422		0.1445
								0.0056114		17.753
								8.6315		0.55717
								1.3967		3.4566
								-0.0035221		0.0025974
								1.2509		2.8494
								0.11041		1.4733
								-0.28346		1.865
								-0.040416		5.54
								1.0225		2.7356
								0.0025199		1.4375
								-0.61066		0.055715
								-0.12099		5.8682
								-0.19376		0.056761
								-0.70363		0.10154
								-0.63696		0.18167
								70.241		85.15
								-0.34814		-0.090598
								-1.153		-0.0056252
								0.011055		0.37051
								0.26142		1.2338
								0.013243		-0.80482
								55.962		67.47
								-0.12275		3.7349
								-1.6506		-0.51418
								-1.6643		-0.018576
								-0.11243		-0.090908
								-0.044091		0.27653
								-1.2733		0.00016003
								-0.29378		0.46125
								-0.39757		-1.5991
								-0.093354		0.017174
								1.3802		-0.18985
								-0.19083		2.2962
								9.7438		2.4327
								0.035286		0.9867
								-0.036044		-0.061552
								7.7916		12.319
								-0.031501		11.063
								2.4051		2.6457
								-1.3394		-0.017988
								-1.0317		7.3383
								-0.00279		0.64371
								-0.0044116		0.11343
								0.017776		1.1666
								-1.1506		0.0074606
								-0.016676		-0.55229
								-2.1113		0.0022267
								1.4414		1.3212
								-0.23997		-0.1458
								-0.54067		-0.87826
								3.9244		-0.68508
								0.0076278		-0.0020802
								-0.00097324		0.57191
								-1.7421		0.0055689
								-0.34816		0.92178
								-0.63087		-1.1268
								-2.4507		0.149
								-0.12179		-0.085435
								39.232		0.34441
								-0.69218		-0.20057
								1.3553		-1.1018
								-0.018862		-0.037721
								-0.44372		13.138
								-0.44372		13.138
								1.0469		12.753
								0.078		5.0299
								-1.1344		0.19308
								0.73307		-0.016155
								-0.15287		1.7884
								-0.029704		0.003061
								7.2208		12.431
								-1.1777		-0.87048
								0.085611		1.1201
								5.228		1.5124
								-0.030239		-0.82988
								-1.3839		0.00023916
								-0.13529		1.5824
								-0.2143		0.016636
								-0.49695		-0.059929
								-0.55268		-0.064493
								-1.344		2.0502
								-0.014329		0.3106
								-0.80532		-0.21656
								-0.29238		-0.19969
								-1.7085		0.26977
								-0.025376		-0.33772
								-0.013545		0.90541
								1.0894		0.06725
								-1.342		-0.066654
								-0.080893		-0.30776
								-0.00078819		0.13074
								0.3427		0.15177
								6.2259		0.47057
								-0.35169		0.27714
								-0.44268		-0.003842
								-0.10283		5.9475
								0.028262		1.0183
								-0.51846		0.65116
								0.4108		-0.022372
								16.922		9.9652
								24.784		58.48
								1.1847		0.0010211
								2938.8		1969.9
								11.433		14.353
								6.0834		-0.015251
								-0.61765		5.0827
								0.087325		-0.025333
								0.00070064		0.068757
								0.33275		1.5
								0.80914		-0.17558
								0.25442		-0.18057
								17.767		20.003
								24.85		6.2269
								-0.93293		-0.49037
								13.361		0.57563
								0.0026074		5.7567
								-2.0425		0.74143
								-0.6298		34.983
								8.5724		-0.067671
								-0.36659		8.3586
								57.689		176.42
								0.004251		-0.1461
								1.2007		-0.013142
								0.43888		1.0056
								0.013814		0.98984
								0.45791		-0.055867
								-0.14121		-2.654
								0.00014929		-0.46078
								-0.030955		7.7657
								-0.73887		0.20918
								-0.041801		-0.0048885
								-0.64233		4.5395
								4.6384		4.4351
								-0.69957		1.5441
								-0.70152		20.245
								-0.41414		0.67441
								-0.1088		-0.19132
								-0.27616		-0.12101
								3.2509		4.9772
								-0.29046		-0.024619
								0.050259		3.7875
								2.8111		1.8353
								-0.2816		0.11918
								3.1978		-0.17763
								-4.4107		-0.10338
								1.6106		-0.27392
								-0.54997		8.4168
								-1.442		1.2131
								0.5104		7.0578
								-0.26042		0.63502
								0.0013929		-0.74526
								-0.10375		-1.2063
								1.7522		3.2389
								0.53456		0.19855
								-0.87194		-0.35516
								0.70713		-0.35381
								2.1672		-0.49226
								0.016449		-0.073492
								-0.2063		0.092069
								-0.39866		-0.30549
								-0.013037		-0.077853
								0.021345		-1.3581
								-1.452		0.041666
								-0.17806		-0.14807
								-0.32811		-0.015299
								-0.31638		0.37036
								-0.93642		-0.049325
								-0.022825		1.3988
								-0.51654		-1.7357
								15.014		1.1662
								0.66251		4.8563
								1.0905		0.13448
								70.871		-0.21231
								-1.4969		0.017052
								0.1426		0.56885
								0.67765		0.38232
								0.46424		-0.13099
								0.46544		9.891
								44.817		61.15
								13.712		38.371
								0.28908		53.011
								52.28		54.215
								276.82		119.49
								280.18		109.98
								91.313		3.5797
								85.591		3.0851
								0.27085		155.42
								-0.00041198		28.655
								3.0651		2.8147
								6.6904		109.15
								33.17		23.457
								50.709		450.34
								0.9348		40.806
								66.87		18.785
								37.187		81.712
								82.324		52.773
								486.09		164.99
								9.2675		10.318
								13.387		28.87
								32.846		27.191
								0.16992		62.376
								10.826		262.1
								-0.016348		42.673
								0.30421		21.141
								16.956		30.353
								12.073		12.16
								830.91		1011
								0.10368		2.1875
								7.6031		26.578
								5.7157		25.079
								2.1031		4.3722
								118.92		52.732
								4.8419		0.79028
								-0.25045		19.076
								0.21545		4.5649
								9.7722		22.092
								51.698		18.599
								149.19		15.425
								1.9513		108.32
								-2.6807		12.638
								0.20475		24.776
								919.47		198.53
								0.63342		6.8899
								25.287		16.26
								128.18		26.292
								0.0060647		0.99923
								615.58		113.46
								2.5318		0.90718
								8.446		2.8629
								2.3096		0.24668
								-2.0598		4.4671
								8.0189		0.4204
								7.0171		11.22
								864.99		314.14
								32.819		247.37
								0.20481		-0.43466
								51.147		1.7148
								0.076924		43.454
								40.313		21.842
								3.9159		24.446
								202.7		290.1
								-0.53092		0.97317
								384.07		82.727
								-0.48098		13.658
								101.68		131.3
								-0.74477		18.661
								171.15		20.597
								1.9683		11.305
								-1.0014		3.2312
								60.323		16.969
								0.0023695		11.951
								-0.11132		78.615
								68.667		73.677
								1.0592		3.1767
								6.279		1.0161
								0.16599		-0.012192
								185.38		42.21
								-0.0036295		13.532
								2.7616		4.9653
								182.38		35.945
								-0.088762		30.345
								0.39363		28.922
								0.94689		29.62
								-0.48706		5.1315
								2.0124		11.889
								-3.2419		2.1786
								6.7499		1.0477
								21.213		41.865
								-0.46053		11.718
								0.022908		3.1151
								3.2161		4.1356
								2.1928		2.36
								0.34703		1.7555
								2.2651		25.069
								4.7267		8.6976
								-0.60994		5.9958
								4.2594		3.9473
								17.093		23.886
								0.012345		5.7852
								-0.29738		13.958
								0.61582		22.539
								-0.0022402		38.082
								0.17758		2.0676
								0.14453		0.0093669
								-4.254		13.854
								38.047		9.1765
								0.20625		-0.025472
								9.846		31.213
								7.8174		2.2626
								3.5001		34.54
								-0.18747		0.4224
								11.175		167.06
								11.175		167.06
								-0.056323		0.24368
								5.808		0.48422
								-0.008303		6.9373
								12.871		0.97082
								2.3468		2.4466
								6.4479		0.13614
								26.156		16.264
								108.09		0.36177
								17.389		1.1509
								18.485		5.9758
								-0.011716		10.344
								-0.58221		0.62885
								2.3234		1.7462
								0.042412		11.525
								-0.50729		-0.43817
								2.3247		8.0398
								3.5145		5.0647
								1.9189		-0.88805
								2.0968		0.047032
								0.12928		0.00045812
								5.8314		0.36489
								65.819		11.056
								-0.057548		1.2944
								7.6135		3.6661
								-0.78365		0.0040598
								0.28044		3.2457
								1.3372		8.1888
								2.5644		4.4868
								-0.78038		8.2035
								-0.11566		-0.03649
								42.437		23.305
								0.049393		1.634
								0.32743		8.7575
								0.0066725		0.012416
								2.7522		11.521
								-0.51231		11.915
								0.75958		9.3624
								49.534		39.049
								4.1722		0.52001
								0.060865		-0.69668
								0.054314		0.63832
								13.369		13.501
								11.044		1.5688
								9.1256		0.011878
								0.63034		2.1238
								0.013242		3.0929
								0.70224		0.63155
								14.792		3.1912
								0.77116		-0.13646
								4.1791		2.5146
								0.10977		-0.2676
								0.52255		0.053289
								48.963		53.699
								1.8428		-0.13813
								-0.089025		2.6701
								2.7386		196.52
								10.923		331.09
								0.0087099		9.7918
								1.2789		0.26165
								1.1916		43.821
								1.0087		39.446
								321.68		69.084
								-0.025928		0.45739
								-0.15724		0.63204
								0.054583		0.39786
								4.0117		2.0045
								10.232		40.639
								105.65		167.09
								6.2903		-0.009519
								2.2235		0.16952
								39.635		419.23
								47.009		15.838
								0.045208		0.23132
								18.67		0.43329
								0.2155		1.9703
								-0.70852		4.2147
								0.51083		20.462
								-0.059297		20.628
								-0.08594		2.9592
								0.37908		2.1366
								0.46884		27.985
								6.5412		55.157
								0.12995		9.8273
								-0.33156		2.4711
								81.908		158.74
								15.195		4.4839
								1.6191		1.9628
								0.54259		0.010969
								-0.010029		1.8447
								-0.84221		8.7928
								100.37		41.921
								15.735		118.84
								6.6504		32.558
								-0.092344		3.1593
								2.3878		0.20418
								2.074		21.468
								-0.0034647		2.7739
								-0.17857		-1.1509
								7.6024		1.1718
								34.373		15.178
								-0.053607		0.0042321
								0.21409		0.33448
								0.78705		2.1324
								1.5159		3.4316
								3.6575		4.0579
								-0.83104		8.0795
								-1.1142		3.0525
								9.9097		5.0607
								-0.25535		0.23669
								60.782		0.85536
								-0.20274		-0.00039396
								9.5553		69.692
								0.028608		-0.04967
								-0.051721		5.4678
								10.445		0.77213
								0.0024304		-0.19737
								7.8708		2.782
								4.5782		-0.33071
								0.18614		0.055309
								13.932		0.98356
								9.8128		3.6227
								-0.16227		0.5134
								0.39017		-0.099965
								0.027359		1.9571
								9.4901		0.47358
								0.015831		26.249
								12.051		212.55
								0.95419		1.5589
								13.223		6.9313
								-0.73411		5.6133
								-0.11173		4.6754
								13.011		23.681
								1.5213		-0.63538
								0.69796		23.526
								98.825		134.8
								-0.46109		0.43503
								4.3819		3.6012
								78.634		53.09
								78.634		53.09
								0.87809		-0.087882
								0.010585		4.8296
								1.1154		72.693
								2.5551		6.0358
								-0.82624		0.7831
								-0.72753		0.15086
								-0.059319		0.10799
								1.7526		0.53512
								-0.31116		5.6353
								-0.58458		-0.64748
								0.12909		2925.9

## Sheet: Sheet3
terms	OMIC gene counts		tumor specific responding	61		normal specific responding	76		no responding	39		consistent responding	10		divergent responding	55
tumor specific responding	61		tumor specific responding	49		normal specific responding	46		no responding	38		consistent responding	7		divergent responding	52
tumor specific responding	24		tumor specific responding	35		normal specific responding	39		no responding	33		consistent responding	5		divergent responding	52
tumor specific responding	3		tumor specific responding	35		normal specific responding	28		no responding	33		consistent responding	5		divergent responding	44
tumor specific responding	4		tumor specific responding	33		normal specific responding	28		no responding	30		consistent responding	4		divergent responding	38
tumor specific responding	22		tumor specific responding	33		normal specific responding	28		no responding	27		consistent responding	4		divergent responding	38
tumor specific responding	3		tumor specific responding	32		normal specific responding	25		no responding	26		consistent responding	4		divergent responding	37
tumor specific responding	19		tumor specific responding	29		normal specific responding	24		no responding	24		consistent responding	3		divergent responding	35
tumor specific responding	6		tumor specific responding	27		normal specific responding	23		no responding	24		consistent responding	3		divergent responding	34
tumor specific responding	18		tumor specific responding	27		normal specific responding	22		no responding	23		consistent responding	3		divergent responding	31
tumor specific responding	16		tumor specific responding	27		normal specific responding	22		no responding	21		consistent responding	2		divergent responding	31
tumor specific responding	5		tumor specific responding	26		normal specific responding	22		no responding	20		consistent responding	2		divergent responding	30
tumor specific responding	26		tumor specific responding	26		normal specific responding	19		no responding	20		consistent responding	2		divergent responding	28
tumor specific responding	19		tumor specific responding	24		normal specific responding	18		no responding	18		consistent responding	2		divergent responding	27
tumor specific responding	33		tumor specific responding	23		normal specific responding	15		no responding	17		consistent responding	2		divergent responding	26
tumor specific responding	19		tumor specific responding	23		normal specific responding	15		no responding	17		consistent responding	2		divergent responding	25
tumor specific responding	27		tumor specific responding	23		normal specific responding	14		no responding	16		consistent responding	2		divergent responding	24
tumor specific responding	7		tumor specific responding	23		normal specific responding	12		no responding	16		consistent responding	1		divergent responding	23
tumor specific responding	6		tumor specific responding	23		normal specific responding	12		no responding	15		consistent responding	1		divergent responding	22
tumor specific responding	27		tumor specific responding	22		normal specific responding	12		no responding	15		consistent responding	0		divergent responding	22
tumor specific responding	27		tumor specific responding	21		normal specific responding	12		no responding	15		consistent responding	0		divergent responding	21
tumor specific responding	17		tumor specific responding	21		normal specific responding	12		no responding	15		consistent responding	0		divergent responding	21
tumor specific responding	23		tumor specific responding	21		normal specific responding	11		no responding	14		consistent responding	0		divergent responding	21
tumor specific responding	23		tumor specific responding	19		normal specific responding	11		no responding	14		consistent responding	0		divergent responding	20
tumor specific responding	12		tumor specific responding	19		normal specific responding	10		no responding	13		consistent responding	0		divergent responding	20
tumor specific responding	10		tumor specific responding	19		normal specific responding	10		no responding	13		consistent responding	0		divergent responding	19
tumor specific responding	14		tumor specific responding	18		normal specific responding	10		no responding	13					divergent responding	19
tumor specific responding	8		tumor specific responding	18		normal specific responding	10		no responding	12					divergent responding	19
tumor specific responding	2		tumor specific responding	18		normal specific responding	9		no responding	12					divergent responding	18
tumor specific responding	3		tumor specific responding	18		normal specific responding	9		no responding	12					divergent responding	17
tumor specific responding	15		tumor specific responding	17		normal specific responding	9		no responding	11					divergent responding	17
tumor specific responding	1		tumor specific responding	16		normal specific responding	9		no responding	11					divergent responding	16
tumor specific responding	16		tumor specific responding	16		normal specific responding	9		no responding	11					divergent responding	16
tumor specific responding	16		tumor specific responding	16		normal specific responding	9		no responding	11					divergent responding	15
tumor specific responding	3		tumor specific responding	16		normal specific responding	9		no responding	11					divergent responding	15
tumor specific responding	26		tumor specific responding	16		normal specific responding	9		no responding	10					divergent responding	15
tumor specific responding	16		tumor specific responding	15		normal specific responding	8		no responding	10					divergent responding	15
tumor specific responding	7		tumor specific responding	15		normal specific responding	8		no responding	10					divergent responding	15
tumor specific responding	1		tumor specific responding	14		normal specific responding	8		no responding	10					divergent responding	14
tumor specific responding	4		tumor specific responding	14		normal specific responding	8		no responding	10					divergent responding	14
tumor specific responding	4		tumor specific responding	14		normal specific responding	8		no responding	10					divergent responding	14
tumor specific responding	18		tumor specific responding	14		normal specific responding	8		no responding	9					divergent responding	14
tumor specific responding	5		tumor specific responding	14		normal specific responding	7		no responding	9					divergent responding	13
tumor specific responding	5		tumor specific responding	13		normal specific responding	7		no responding	9					divergent responding	12
tumor specific responding	11		tumor specific responding	13		normal specific responding	7		no responding	9					divergent responding	12
tumor specific responding	4		tumor specific responding	12		normal specific responding	7		no responding	9					divergent responding	12
tumor specific responding	1		tumor specific responding	12		normal specific responding	7		no responding	9					divergent responding	12
tumor specific responding	4		tumor specific responding	12		normal specific responding	7		no responding	9					divergent responding	11
tumor specific responding	9		tumor specific responding	11		normal specific responding	7		no responding	9					divergent responding	11
tumor specific responding	10		tumor specific responding	11		normal specific responding	6		no responding	9					divergent responding	11
tumor specific responding	18		tumor specific responding	11		normal specific responding	6		no responding	9					divergent responding	11
tumor specific responding	3		tumor specific responding	11		normal specific responding	6		no responding	9					divergent responding	11
tumor specific responding	2		tumor specific responding	11		normal specific responding	6		no responding	9					divergent responding	10
tumor specific responding	3		tumor specific responding	10		normal specific responding	6		no responding	9					divergent responding	10
tumor specific responding	4		tumor specific responding	10		normal specific responding	6		no responding	9					divergent responding	10
tumor specific responding	1		tumor specific responding	10		normal specific responding	6		no responding	8					divergent responding	10
tumor specific responding	1		tumor specific responding	10		normal specific responding	6		no responding	8					divergent responding	10
tumor specific responding	5		tumor specific responding	10		normal specific responding	6		no responding	8					divergent responding	10
tumor specific responding	4		tumor specific responding	10		normal specific responding	5		no responding	8					divergent responding	9
tumor specific responding	8		tumor specific responding	10		normal specific responding	5		no responding	8					divergent responding	9
tumor specific responding	4		tumor specific responding	9		normal specific responding	5		no responding	8					divergent responding	9
tumor specific responding	2		tumor specific responding	9		normal specific responding	5		no responding	8					divergent responding	9
tumor specific responding	4		tumor specific responding	9		normal specific responding	5		no responding	7					divergent responding	9
tumor specific responding	4		tumor specific responding	9		normal specific responding	5		no responding	7					divergent responding	9
tumor specific responding	8		tumor specific responding	9		normal specific responding	5		no responding	7					divergent responding	9
tumor specific responding	3		tumor specific responding	9		normal specific responding	5		no responding	7					divergent responding	9
tumor specific responding	14		tumor specific responding	9		normal specific responding	5		no responding	7					divergent responding	8
tumor specific responding	4		tumor specific responding	9		normal specific responding	5		no responding	7					divergent responding	8
tumor specific responding	0		tumor specific responding	9		normal specific responding	5		no responding	7					divergent responding	8
tumor specific responding	3		tumor specific responding	8		normal specific responding	4		no responding	7					divergent responding	8
tumor specific responding	14		tumor specific responding	8		normal specific responding	4		no responding	7					divergent responding	8
tumor specific responding	3		tumor specific responding	8		normal specific responding	4		no responding	7					divergent responding	8
tumor specific responding	8		tumor specific responding	8		normal specific responding	4		no responding	7					divergent responding	8
tumor specific responding	8		tumor specific responding	8		normal specific responding	4		no responding	7					divergent responding	8
tumor specific responding	3		tumor specific responding	8		normal specific responding	4		no responding	6					divergent responding	8
tumor specific responding	6		tumor specific responding	8		normal specific responding	4		no responding	6					divergent responding	8
tumor specific responding	0		tumor specific responding	8		normal specific responding	4		no responding	6					divergent responding	8
tumor specific responding	2		tumor specific responding	8		normal specific responding	4		no responding	6					divergent responding	7
tumor specific responding	2		tumor specific responding	8		normal specific responding	4		no responding	6					divergent responding	7
tumor specific responding	1		tumor specific responding	8		normal specific responding	4		no responding	6					divergent responding	7
tumor specific responding	7		tumor specific responding	8		normal specific responding	4		no responding	6					divergent responding	7
tumor specific responding	6		tumor specific responding	8		normal specific responding	4		no responding	6					divergent responding	7
tumor specific responding	5		tumor specific responding	8		normal specific responding	4		no responding	6					divergent responding	7
tumor specific responding	6		tumor specific responding	8		normal specific responding	3		no responding	6					divergent responding	7
tumor specific responding	0		tumor specific responding	8		normal specific responding	3		no responding	6					divergent responding	7
tumor specific responding	8		tumor specific responding	8		normal specific responding	3		no responding	6					divergent responding	7
tumor specific responding	3		tumor specific responding	8		normal specific responding	3		no responding	6					divergent responding	7
tumor specific responding	11		tumor specific responding	8		normal specific responding	3		no responding	5					divergent responding	6
tumor specific responding	3		tumor specific responding	8		normal specific responding	3		no responding	5					divergent responding	6
tumor specific responding	7		tumor specific responding	7		normal specific responding	3		no responding	5					divergent responding	6
tumor specific responding	6		tumor specific responding	7		normal specific responding	3		no responding	5					divergent responding	6
tumor specific responding	2		tumor specific responding	7		normal specific responding	3		no responding	5					divergent responding	6
tumor specific responding	2		tumor specific responding	7		normal specific responding	3		no responding	5					divergent responding	6
tumor specific responding	4		tumor specific responding	7		normal specific responding	3		no responding	5					divergent responding	6
tumor specific responding	2		tumor specific responding	7		normal specific responding	3		no responding	5					divergent responding	6
tumor specific responding	7		tumor specific responding	7		normal specific responding	3		no responding	5					divergent responding	6
tumor specific responding	6		tumor specific responding	7		normal specific responding	3		no responding	5					divergent responding	6
tumor specific responding	7		tumor specific responding	7		normal specific responding	3		no responding	5					divergent responding	6
tumor specific responding	14		tumor specific responding	7		normal specific responding	3		no responding	5					divergent responding	5
tumor specific responding	3		tumor specific responding	7		normal specific responding	3		no responding	5					divergent responding	5
tumor specific responding	2		tumor specific responding	7		normal specific responding	3		no responding	5					divergent responding	5
tumor specific responding	2		tumor specific responding	7		normal specific responding	3		no responding	5					divergent responding	5
tumor specific responding	3		tumor specific responding	7		normal specific responding	3		no responding	5					divergent responding	5
tumor specific responding	5		tumor specific responding	7		normal specific responding	3		no responding	5					divergent responding	5
tumor specific responding	9		tumor specific responding	7		normal specific responding	2		no responding	5					divergent responding	5
tumor specific responding	1		tumor specific responding	7		normal specific responding	2		no responding	5					divergent responding	5
tumor specific responding	0		tumor specific responding	6		normal specific responding	2		no responding	5					divergent responding	5
tumor specific responding	5		tumor specific responding	6		normal specific responding	2		no responding	5					divergent responding	5
tumor specific responding	1		tumor specific responding	6		normal specific responding	2		no responding	5					divergent responding	5
tumor specific responding	0		tumor specific responding	6		normal specific responding	2		no responding	4					divergent responding	5
tumor specific responding	1		tumor specific responding	6		normal specific responding	2		no responding	4					divergent responding	5
tumor specific responding	6		tumor specific responding	6		normal specific responding	2		no responding	4					divergent responding	5
tumor specific responding	5		tumor specific responding	6		normal specific responding	2		no responding	4					divergent responding	5
tumor specific responding	0		tumor specific responding	6		normal specific responding	2		no responding	4					divergent responding	5
tumor specific responding	0		tumor specific responding	6		normal specific responding	2		no responding	4					divergent responding	4
tumor specific responding	4		tumor specific responding	6		normal specific responding	2		no responding	4					divergent responding	4
tumor specific responding	0		tumor specific responding	6		normal specific responding	2		no responding	4					divergent responding	4
tumor specific responding	6		tumor specific responding	6		normal specific responding	2		no responding	4					divergent responding	4
tumor specific responding	1		tumor specific responding	6		normal specific responding	2		no responding	4					divergent responding	4
tumor specific responding	2		tumor specific responding	6		normal specific responding	2		no responding	4					divergent responding	4
tumor specific responding	3		tumor specific responding	6		normal specific responding	2		no responding	4					divergent responding	4
tumor specific responding	2		tumor specific responding	6		normal specific responding	2		no responding	4					divergent responding	4
tumor specific responding	2		tumor specific responding	5		normal specific responding	2		no responding	4					divergent responding	4
tumor specific responding	0		tumor specific responding	5		normal specific responding	2		no responding	4					divergent responding	4
tumor specific responding	7		tumor specific responding	5		normal specific responding	2		no responding	4					divergent responding	4
tumor specific responding	10		tumor specific responding	5		normal specific responding	2		no responding	4					divergent responding	4
tumor specific responding	6		tumor specific responding	5		normal specific responding	2		no responding	4					divergent responding	4
tumor specific responding	2		tumor specific responding	5		normal specific responding	2		no responding	4					divergent responding	4
tumor specific responding	7		tumor specific responding	5		normal specific responding	2		no responding	4					divergent responding	4
tumor specific responding	0		tumor specific responding	5		normal specific responding	2		no responding	4					divergent responding	4
tumor specific responding	2		tumor specific responding	5		normal specific responding	2		no responding	4					divergent responding	3
tumor specific responding	0		tumor specific responding	5		normal specific responding	2		no responding	4					divergent responding	3
tumor specific responding	0		tumor specific responding	5		normal specific responding	2		no responding	4					divergent responding	3
tumor specific responding	2		tumor specific responding	5		normal specific responding	1		no responding	4					divergent responding	3
tumor specific responding	0		tumor specific responding	5		normal specific responding	1		no responding	4					divergent responding	3
tumor specific responding	3		tumor specific responding	5		normal specific responding	1		no responding	4					divergent responding	3
tumor specific responding	10		tumor specific responding	5		normal specific responding	1		no responding	4					divergent responding	3
tumor specific responding	3		tumor specific responding	5		normal specific responding	1		no responding	4					divergent responding	3
tumor specific responding	2		tumor specific responding	5		normal specific responding	1		no responding	3					divergent responding	3
tumor specific responding	0		tumor specific responding	5		normal specific responding	1		no responding	3					divergent responding	3
tumor specific responding	1		tumor specific responding	5		normal specific responding	1		no responding	3					divergent responding	3
tumor specific responding	4		tumor specific responding	5		normal specific responding	1		no responding	3					divergent responding	3
tumor specific responding	4		tumor specific responding	5		normal specific responding	1		no responding	3					divergent responding	3
tumor specific responding	5		tumor specific responding	5		normal specific responding	1		no responding	3					divergent responding	3
tumor specific responding	3		tumor specific responding	5		normal specific responding	1		no responding	3					divergent responding	3
tumor specific responding	5		tumor specific responding	5		normal specific responding	1		no responding	3					divergent responding	3
tumor specific responding	6		tumor specific responding	4		normal specific responding	1		no responding	3					divergent responding	3
tumor specific responding	0		tumor specific responding	4		normal specific responding	1		no responding	3					divergent responding	3
tumor specific responding	2		tumor specific responding	4		normal specific responding	1		no responding	3					divergent responding	3
tumor specific responding	0		tumor specific responding	4		normal specific responding	1		no responding	3					divergent responding	3
tumor specific responding	0		tumor specific responding	4		normal specific responding	1		no responding	3					divergent responding	3
tumor specific responding	3		tumor specific responding	4		normal specific responding	1		no responding	3					divergent responding	3
tumor specific responding	3		tumor specific responding	4		normal specific responding	1		no responding	3					divergent responding	2
tumor specific responding	0		tumor specific responding	4		normal specific responding	1		no responding	3					divergent responding	2
tumor specific responding	0		tumor specific responding	4		normal specific responding	1		no responding	3					divergent responding	2
tumor specific responding	7		tumor specific responding	4		normal specific responding	1		no responding	3					divergent responding	2
tumor specific responding	2		tumor specific responding	4		normal specific responding	1		no responding	3					divergent responding	2
tumor specific responding	2		tumor specific responding	4		normal specific responding	1		no responding	3					divergent responding	2
tumor specific responding	1		tumor specific responding	4		normal specific responding	1		no responding	3					divergent responding	2
tumor specific responding	7		tumor specific responding	4		normal specific responding	1		no responding	3					divergent responding	2
tumor specific responding	0		tumor specific responding	4		normal specific responding	1		no responding	3					divergent responding	2
tumor specific responding	2		tumor specific responding	4		normal specific responding	1		no responding	3					divergent responding	2
tumor specific responding	0		tumor specific responding	4		normal specific responding	1		no responding	3					divergent responding	2
tumor specific responding	3		tumor specific responding	4		normal specific responding	1		no responding	3					divergent responding	2
tumor specific responding	2		tumor specific responding	4		normal specific responding	1		no responding	3					divergent responding	2
tumor specific responding	3		tumor specific responding	4		normal specific responding	1		no responding	3					divergent responding	2
tumor specific responding	1		tumor specific responding	4		normal specific responding	1		no responding	3					divergent responding	2
tumor specific responding	0		tumor specific responding	4		normal specific responding	1		no responding	3					divergent responding	2
tumor specific responding	0		tumor specific responding	4		normal specific responding	1		no responding	3					divergent responding	2
tumor specific responding	0		tumor specific responding	4		normal specific responding	1		no responding	3					divergent responding	2
tumor specific responding	1		tumor specific responding	4		normal specific responding	1		no responding	3					divergent responding	2
tumor specific responding	0		tumor specific responding	4		normal specific responding	1		no responding	3					divergent responding	2
tumor specific responding	1		tumor specific responding	4		normal specific responding	1		no responding	3					divergent responding	2
tumor specific responding	1		tumor specific responding	4		normal specific responding	0		no responding	3					divergent responding	2
tumor specific responding	2		tumor specific responding	4		normal specific responding	0		no responding	3					divergent responding	2
tumor specific responding	5		tumor specific responding	4		normal specific responding	0		no responding	3					divergent responding	2
tumor specific responding	2		tumor specific responding	3		normal specific responding	0		no responding	3					divergent responding	2
tumor specific responding	0		tumor specific responding	3		normal specific responding	0		no responding	3					divergent responding	2
tumor specific responding	5		tumor specific responding	3		normal specific responding	0		no responding	3					divergent responding	2
tumor specific responding	0		tumor specific responding	3		normal specific responding	0		no responding	3					divergent responding	2
tumor specific responding	0		tumor specific responding	3		normal specific responding	0		no responding	3					divergent responding	2
tumor specific responding	2		tumor specific responding	3		normal specific responding	0		no responding	2					divergent responding	2
tumor specific responding	3		tumor specific responding	3		normal specific responding	0		no responding	2					divergent responding	2
tumor specific responding	2		tumor specific responding	3		normal specific responding	0		no responding	2					divergent responding	1
tumor specific responding	2		tumor specific responding	3		normal specific responding	0		no responding	2					divergent responding	1
tumor specific responding	5		tumor specific responding	3		normal specific responding	0		no responding	2					divergent responding	1
tumor specific responding	0		tumor specific responding	3		normal specific responding	0		no responding	2					divergent responding	1
tumor specific responding	2		tumor specific responding	3		normal specific responding	0		no responding	2					divergent responding	1
tumor specific responding	0		tumor specific responding	3		normal specific responding	0		no responding	2					divergent responding	1
tumor specific responding	1		tumor specific responding	3		normal specific responding	0		no responding	2					divergent responding	1
tumor specific responding	1		tumor specific responding	3		normal specific responding	0		no responding	2					divergent responding	1
tumor specific responding	0		tumor specific responding	3		normal specific responding	0		no responding	2					divergent responding	1
tumor specific responding	0		tumor specific responding	3		normal specific responding	0		no responding	2					divergent responding	1
tumor specific responding	2		tumor specific responding	3		normal specific responding	0		no responding	2					divergent responding	1
tumor specific responding	3		tumor specific responding	3		normal specific responding	0		no responding	2					divergent responding	1
tumor specific responding	0		tumor specific responding	3		normal specific responding	0		no responding	2					divergent responding	1
tumor specific responding	1		tumor specific responding	3		normal specific responding	0		no responding	2					divergent responding	1
tumor specific responding	0		tumor specific responding	3		normal specific responding	0		no responding	2					divergent responding	1
tumor specific responding	0		tumor specific responding	3		normal specific responding	0		no responding	2					divergent responding	1
tumor specific responding	0		tumor specific responding	3		normal specific responding	0		no responding	2					divergent responding	1
tumor specific responding	1		tumor specific responding	3		normal specific responding	0		no responding	2					divergent responding	1
tumor specific responding	0		tumor specific responding	3		normal specific responding	0		no responding	2					divergent responding	1
tumor specific responding	1		tumor specific responding	3		normal specific responding	0		no responding	2					divergent responding	1
tumor specific responding	0		tumor specific responding	3		normal specific responding	0		no responding	2					divergent responding	1
tumor specific responding	4		tumor specific responding	3		normal specific responding	0		no responding	2					divergent responding	1
tumor specific responding	1		tumor specific responding	3		normal specific responding	0		no responding	2					divergent responding	1
tumor specific responding	0		tumor specific responding	3		normal specific responding	0		no responding	2					divergent responding	1
tumor specific responding	2		tumor specific responding	3		normal specific responding	0		no responding	2					divergent responding	1
tumor specific responding	4		tumor specific responding	3		normal specific responding	0		no responding	2					divergent responding	1
tumor specific responding	0		tumor specific responding	3		normal specific responding	0		no responding	2					divergent responding	1
tumor specific responding	0		tumor specific responding	3		normal specific responding	0		no responding	2					divergent responding	0
tumor specific responding	2		tumor specific responding	3		normal specific responding	0		no responding	2					divergent responding	0
tumor specific responding	2		tumor specific responding	3		normal specific responding	0		no responding	2					divergent responding	0
tumor specific responding	1		tumor specific responding	3		normal specific responding	0		no responding	2					divergent responding	0
tumor specific responding	3		tumor specific responding	2					no responding	2					divergent responding	0
tumor specific responding	0		tumor specific responding	2					no responding	2					divergent responding	0
tumor specific responding	0		tumor specific responding	2					no responding	2					divergent responding	0
tumor specific responding	2		tumor specific responding	2					no responding	2					divergent responding	0
tumor specific responding	0		tumor specific responding	2					no responding	2					divergent responding	0
tumor specific responding	0		tumor specific responding	2					no responding	2					divergent responding	0
tumor specific responding	0		tumor specific responding	2					no responding	2					divergent responding	0
tumor specific responding	2		tumor specific responding	2					no responding	2					divergent responding	0
tumor specific responding	1		tumor specific responding	2					no responding	2					divergent responding	0
tumor specific responding	2		tumor specific responding	2					no responding	2					divergent responding	0
tumor specific responding	1		tumor specific responding	2					no responding	2					divergent responding	0
tumor specific responding	1		tumor specific responding	2					no responding	1					divergent responding	0
tumor specific responding	0		tumor specific responding	2					no responding	1					divergent responding	0
tumor specific responding	1		tumor specific responding	2					no responding	1					divergent responding	0
tumor specific responding	1		tumor specific responding	2					no responding	1					divergent responding	0
tumor specific responding	2		tumor specific responding	2					no responding	1					divergent responding	0
tumor specific responding	3		tumor specific responding	2					no responding	1					divergent responding	0
tumor specific responding	4		tumor specific responding	2					no responding	1					divergent responding	0
tumor specific responding	2		tumor specific responding	2					no responding	1					divergent responding	0
tumor specific responding	1		tumor specific responding	2					no responding	1					divergent responding	0
tumor specific responding	0		tumor specific responding	2					no responding	1					divergent responding	0
tumor specific responding	0		tumor specific responding	2					no responding	1					divergent responding	0
tumor specific responding	0		tumor specific responding	2					no responding	1					divergent responding	0
tumor specific responding	1		tumor specific responding	2					no responding	1					divergent responding	0
tumor specific responding	2		tumor specific responding	2					no responding	1					divergent responding	0
tumor specific responding	0		tumor specific responding	2					no responding	1					divergent responding	0
tumor specific responding	0		tumor specific responding	2					no responding	1
tumor specific responding	0		tumor specific responding	2					no responding	1
tumor specific responding	1		tumor specific responding	2					no responding	1
tumor specific responding	1		tumor specific responding	2					no responding	1
tumor specific responding	1		tumor specific responding	2					no responding	1
tumor specific responding	0		tumor specific responding	2					no responding	1
tumor specific responding	2		tumor specific responding	2					no responding	1
tumor specific responding	1		tumor specific responding	2					no responding	1
tumor specific responding	0		tumor specific responding	2					no responding	1
tumor specific responding	0		tumor specific responding	2					no responding	1
tumor specific responding	0		tumor specific responding	2					no responding	1
tumor specific responding	2		tumor specific responding	2					no responding	1
tumor specific responding	23		tumor specific responding	2					no responding	1
tumor specific responding	16		tumor specific responding	2					no responding	1
tumor specific responding	7		tumor specific responding	2					no responding	1
tumor specific responding	18		tumor specific responding	2					no responding	1
tumor specific responding	14		tumor specific responding	2					no responding	1
tumor specific responding	8		tumor specific responding	2					no responding	1
tumor specific responding	3		tumor specific responding	2					no responding	1
tumor specific responding	0		tumor specific responding	2					no responding	1
tumor specific responding	9		tumor specific responding	2					no responding	1
tumor specific responding	10		tumor specific responding	2					no responding	1
tumor specific responding	32		tumor specific responding	2					no responding	1
tumor specific responding	21		tumor specific responding	2					no responding	1
tumor specific responding	13		tumor specific responding	2					no responding	1
tumor specific responding	13		tumor specific responding	2					no responding	1
tumor specific responding	12		tumor specific responding	2					no responding	1
tumor specific responding	12		tumor specific responding	2					no responding	1
tumor specific responding	21		tumor specific responding	1					no responding	1
tumor specific responding	21		tumor specific responding	1					no responding	1
tumor specific responding	0		tumor specific responding	1					no responding	1
tumor specific responding	1		tumor specific responding	1					no responding	1
tumor specific responding	0		tumor specific responding	1					no responding	1
tumor specific responding	6		tumor specific responding	1					no responding	1
tumor specific responding	2		tumor specific responding	1					no responding	1
tumor specific responding	23		tumor specific responding	1					no responding	1
tumor specific responding	1		tumor specific responding	1					no responding	1
tumor specific responding	0		tumor specific responding	1					no responding	1
tumor specific responding	3		tumor specific responding	1					no responding	1
tumor specific responding	8		tumor specific responding	1					no responding	1
tumor specific responding	0		tumor specific responding	1					no responding	1
tumor specific responding	2		tumor specific responding	1					no responding	1
tumor specific responding	1		tumor specific responding	1					no responding	1
tumor specific responding	3		tumor specific responding	1					no responding	1
tumor specific responding	5		tumor specific responding	1					no responding	1
tumor specific responding	2		tumor specific responding	1					no responding	1
tumor specific responding	3		tumor specific responding	1					no responding	1
tumor specific responding	0		tumor specific responding	1					no responding	1
tumor specific responding	0		tumor specific responding	1					no responding	1
tumor specific responding	0		tumor specific responding	1					no responding	1
tumor specific responding	1		tumor specific responding	1					no responding	1
tumor specific responding	0		tumor specific responding	1					no responding	1
tumor specific responding	0		tumor specific responding	1					no responding	1
tumor specific responding	0		tumor specific responding	1					no responding	1
tumor specific responding	0		tumor specific responding	1					no responding	1
tumor specific responding	2		tumor specific responding	1					no responding	1
tumor specific responding	0		tumor specific responding	1					no responding	1
tumor specific responding	1		tumor specific responding	1					no responding	1
tumor specific responding	0		tumor specific responding	1					no responding	1
tumor specific responding	0		tumor specific responding	1					no responding	1
tumor specific responding	1		tumor specific responding	1					no responding	1
tumor specific responding	0		tumor specific responding	1					no responding	1
tumor specific responding	9		tumor specific responding	1					no responding	0
tumor specific responding	8		tumor specific responding	1					no responding	0
tumor specific responding	11		tumor specific responding	1					no responding	0
tumor specific responding	7		tumor specific responding	1					no responding	0
tumor specific responding	8		tumor specific responding	1					no responding	0
tumor specific responding	8		tumor specific responding	1					no responding	0
tumor specific responding	11		tumor specific responding	1					no responding	0
tumor specific responding	3		tumor specific responding	1					no responding	0
tumor specific responding	4		tumor specific responding	1					no responding	0
tumor specific responding	5		tumor specific responding	1					no responding	0
tumor specific responding	3		tumor specific responding	1					no responding	0
tumor specific responding	8		tumor specific responding	1					no responding	0
tumor specific responding	8		tumor specific responding	1					no responding	0
tumor specific responding	9		tumor specific responding	1					no responding	0
tumor specific responding	2		tumor specific responding	1					no responding	0
tumor specific responding	10		tumor specific responding	0					no responding	0
tumor specific responding	1		tumor specific responding	0					no responding	0
tumor specific responding	3		tumor specific responding	0					no responding	0
tumor specific responding	3		tumor specific responding	0					no responding	0
tumor specific responding	9		tumor specific responding	0					no responding	0
tumor specific responding	1		tumor specific responding	0					no responding	0
tumor specific responding	7		tumor specific responding	0					no responding	0
tumor specific responding	8		tumor specific responding	0					no responding	0
tumor specific responding	8		tumor specific responding	0					no responding	0
tumor specific responding	5		tumor specific responding	0					no responding	0
tumor specific responding	6		tumor specific responding	0					no responding	0
tumor specific responding	5		tumor specific responding	0					no responding	0
tumor specific responding	11		tumor specific responding	0					no responding	0
tumor specific responding	4		tumor specific responding	0					no responding	0
tumor specific responding	7		tumor specific responding	0					no responding	0
tumor specific responding	2		tumor specific responding	0					no responding	0
tumor specific responding	5		tumor specific responding	0					no responding	0
tumor specific responding	9		tumor specific responding	0					no responding	0
tumor specific responding	5		tumor specific responding	0					no responding	0
tumor specific responding	9		tumor specific responding	0					no responding	0
tumor specific responding	10		tumor specific responding	0					no responding	0
tumor specific responding	7		tumor specific responding	0					no responding	0
tumor specific responding	5		tumor specific responding	0					no responding	0
tumor specific responding	1		tumor specific responding	0					no responding	0
tumor specific responding	7		tumor specific responding	0					no responding	0
tumor specific responding	6		tumor specific responding	0					no responding	0
tumor specific responding	2		tumor specific responding	0					no responding	0
tumor specific responding	2		tumor specific responding	0					no responding	0
tumor specific responding	5		tumor specific responding	0					no responding	0
tumor specific responding	2		tumor specific responding	0					no responding	0
tumor specific responding	9		tumor specific responding	0					no responding	0
tumor specific responding	6		tumor specific responding	0					no responding	0
tumor specific responding	4		tumor specific responding	0					no responding	0
tumor specific responding	4		tumor specific responding	0					no responding	0
tumor specific responding	6		tumor specific responding	0					no responding	0
tumor specific responding	2		tumor specific responding	0					no responding	0
tumor specific responding	0		tumor specific responding	0					no responding	0
tumor specific responding	7		tumor specific responding	0					no responding	0
tumor specific responding	3		tumor specific responding	0					no responding	0
tumor specific responding	2		tumor specific responding	0					no responding	0
tumor specific responding	4		tumor specific responding	0					no responding	0
tumor specific responding	1		tumor specific responding	0					no responding	0
tumor specific responding	4		tumor specific responding	0					no responding	0
tumor specific responding	5		tumor specific responding	0					no responding	0
tumor specific responding	49		tumor specific responding	0					no responding	0
tumor specific responding	35		tumor specific responding	0					no responding	0
tumor specific responding	35		tumor specific responding	0					no responding	0
tumor specific responding	1		tumor specific responding	0					no responding	0
tumor specific responding	8		tumor specific responding	0					no responding	0
tumor specific responding	33		tumor specific responding	0					no responding	0
tumor specific responding	8		tumor specific responding	0					no responding	0
tumor specific responding	8		tumor specific responding	0					no responding	0
tumor specific responding	8		tumor specific responding	0					no responding	0
tumor specific responding	8		tumor specific responding	0					no responding	0
tumor specific responding	29		tumor specific responding	0					no responding	0
tumor specific responding	3		tumor specific responding	0					no responding	0
tumor specific responding	23		tumor specific responding	0					no responding	0
tumor specific responding	0		tumor specific responding	0					no responding	0
tumor specific responding	0		tumor specific responding	0					no responding	0
tumor specific responding	3		tumor specific responding	0					no responding	0
tumor specific responding	3		tumor specific responding	0					no responding	0
tumor specific responding	1		tumor specific responding	0					no responding	0
tumor specific responding	1		tumor specific responding	0					no responding	0
tumor specific responding	0		tumor specific responding	0					no responding	0
tumor specific responding	0		tumor specific responding	0					no responding	0
tumor specific responding	4		tumor specific responding	0					no responding	0
tumor specific responding	0		tumor specific responding	0					no responding	0
tumor specific responding	0		tumor specific responding	0					no responding	0
tumor specific responding	2		tumor specific responding	0					no responding	0
tumor specific responding	0		tumor specific responding	0					no responding	0
tumor specific responding	4		tumor specific responding	0					no responding	0
tumor specific responding	0		tumor specific responding	0					no responding	0
tumor specific responding	1		tumor specific responding	0					no responding	0
tumor specific responding	0		tumor specific responding	0					no responding	0
tumor specific responding	15		tumor specific responding	0					no responding	0
tumor specific responding	5		tumor specific responding	0					no responding	0
tumor specific responding	5		tumor specific responding	0					no responding	0
tumor specific responding	4		tumor specific responding	0					no responding	0
tumor specific responding	4		tumor specific responding	0					no responding	0
tumor specific responding	4		tumor specific responding	0					no responding	0
tumor specific responding	2		tumor specific responding	0					no responding	0
tumor specific responding	2		tumor specific responding	0					no responding	0
tumor specific responding	1		tumor specific responding	0					no responding	0
tumor specific responding	0		tumor specific responding	0					no responding	0
tumor specific responding	4								no responding	0
normal specific responding	46								no responding	0
normal specific responding	28								no responding	0
normal specific responding	9								no responding	0
normal specific responding	11								no responding	0
normal specific responding	9								no responding	0
normal specific responding	9								no responding	0
normal specific responding	12								no responding	0
normal specific responding	4								no responding	0
normal specific responding	22								no responding	0
normal specific responding	12								no responding	0
normal specific responding	4								no responding	0
normal specific responding	1								no responding	0
normal specific responding	8								no responding	0
normal specific responding	5								no responding	0
normal specific responding	15								no responding	0
normal specific responding	15								no responding	0
normal specific responding	8								no responding	0
normal specific responding	14								no responding	0
normal specific responding	9								no responding	0
normal specific responding	0								no responding	0
normal specific responding	0								no responding	0
normal specific responding	6								no responding	0
normal specific responding	5								no responding	0
normal specific responding	9								no responding	0
normal specific responding	6
normal specific responding	7
normal specific responding	1
normal specific responding	2
normal specific responding	11
normal specific responding	0
normal specific responding	1
normal specific responding	10
normal specific responding	3
normal specific responding	2
normal specific responding	1
normal specific responding	8
normal specific responding	1
normal specific responding	0
normal specific responding	8
normal specific responding	5
normal specific responding	3
normal specific responding	3
normal specific responding	2
normal specific responding	2
normal specific responding	7
normal specific responding	1
normal specific responding	0
normal specific responding	3
normal specific responding	10
normal specific responding	1
normal specific responding	6
normal specific responding	7
normal specific responding	2
normal specific responding	2
normal specific responding	0
normal specific responding	2
normal specific responding	1
normal specific responding	3
normal specific responding	5
normal specific responding	3
normal specific responding	9
normal specific responding	0
normal specific responding	2
normal specific responding	6
normal specific responding	1
normal specific responding	5
normal specific responding	6
normal specific responding	2
normal specific responding	3
normal specific responding	0
normal specific responding	5
normal specific responding	4
normal specific responding	3
normal specific responding	2
normal specific responding	7
normal specific responding	3
normal specific responding	1
normal specific responding	10
normal specific responding	0
normal specific responding	1
normal specific responding	1
normal specific responding	4
normal specific responding	1
normal specific responding	1
normal specific responding	0
normal specific responding	2
normal specific responding	5
normal specific responding	0
normal specific responding	0
normal specific responding	1
normal specific responding	6
normal specific responding	2
normal specific responding	3
normal specific responding	2
normal specific responding	5
normal specific responding	1
normal specific responding	0
normal specific responding	0
normal specific responding	0
normal specific responding	0
normal specific responding	2
normal specific responding	0
normal specific responding	6
normal specific responding	2
normal specific responding	0
normal specific responding	0
normal specific responding	1
normal specific responding	3
normal specific responding	0
normal specific responding	0
normal specific responding	2
normal specific responding	0
normal specific responding	6
normal specific responding	3
normal specific responding	2
normal specific responding	3
normal specific responding	3
normal specific responding	0
normal specific responding	2
normal specific responding	2
normal specific responding	0
normal specific responding	0
normal specific responding	1
normal specific responding	4
normal specific responding	4
normal specific responding	0
normal specific responding	8
normal specific responding	1
normal specific responding	2
normal specific responding	4
normal specific responding	0
normal specific responding	1
normal specific responding	3
normal specific responding	4
normal specific responding	1
normal specific responding	0
normal specific responding	1
normal specific responding	1
normal specific responding	0
normal specific responding	1
normal specific responding	2
normal specific responding	1
normal specific responding	0
normal specific responding	0
normal specific responding	4
normal specific responding	0
normal specific responding	1
normal specific responding	2
normal specific responding	1
normal specific responding	1
normal specific responding	1
normal specific responding	2
normal specific responding	1
normal specific responding	1
normal specific responding	0
normal specific responding	1
normal specific responding	0
normal specific responding	1
normal specific responding	0
normal specific responding	0
normal specific responding	3
normal specific responding	1
normal specific responding	2
normal specific responding	3
normal specific responding	3
normal specific responding	12
normal specific responding	9
normal specific responding	4
normal specific responding	4
normal specific responding	8
normal specific responding	3
normal specific responding	10
normal specific responding	7
normal specific responding	4
normal specific responding	22
normal specific responding	2
normal specific responding	5
normal specific responding	2
normal specific responding	0
normal specific responding	1
normal specific responding	5
normal specific responding	1
normal specific responding	1
normal specific responding	2
normal specific responding	1
normal specific responding	0
normal specific responding	0
normal specific responding	3
normal specific responding	6
normal specific responding	9
normal specific responding	7
normal specific responding	1
normal specific responding	0
normal specific responding	4
normal specific responding	39
normal specific responding	5
normal specific responding	23
normal specific responding	28
normal specific responding	22
normal specific responding	24
normal specific responding	7
normal specific responding	12
normal specific responding	12
normal specific responding	3
normal specific responding	2
normal specific responding	1
normal specific responding	76
normal specific responding	28
normal specific responding	25
normal specific responding	2
normal specific responding	4
normal specific responding	19
normal specific responding	0
normal specific responding	18
no responding	38
no responding	39
no responding	24
no responding	13
no responding	23
no responding	33
no responding	33
no responding	30
no responding	10
no responding	3
no responding	3
no responding	13
no responding	24
no responding	1
no responding	16
no responding	20
no responding	17
no responding	9
no responding	3
no responding	0
no responding	15
no responding	15
no responding	17
no responding	4
no responding	15
no responding	1
no responding	1
no responding	14
no responding	12
no responding	12
no responding	14
no responding	10
no responding	18
no responding	1
no responding	9
no responding	11
no responding	5
no responding	1
no responding	15
no responding	7
no responding	11
no responding	4
no responding	2
no responding	5
no responding	3
no responding	1
no responding	7
no responding	3
no responding	10
no responding	2
no responding	1
no responding	10
no responding	5
no responding	2
no responding	9
no responding	6
no responding	0
no responding	1
no responding	10
no responding	4
no responding	1
no responding	10
no responding	9
no responding	6
no responding	8
no responding	3
no responding	0
no responding	4
no responding	0
no responding	8
no responding	1
no responding	2
no responding	4
no responding	6
no responding	0
no responding	2
no responding	4
no responding	1
no responding	3
no responding	7
no responding	2
no responding	9
no responding	5
no responding	0
no responding	7
no responding	5
no responding	1
no responding	5
no responding	5
no responding	9
no responding	3
no responding	0
no responding	7
no responding	7
no responding	4
no responding	2
no responding	0
no responding	6
no responding	0
no responding	5
no responding	1
no responding	5
no responding	2
no responding	7
no responding	3
no responding	9
no responding	6
no responding	1
no responding	7
no responding	7
no responding	0
no responding	9
no responding	0
no responding	9
no responding	3
no responding	0
no responding	5
no responding	3
no responding	2
no responding	1
no responding	0
no responding	0
no responding	2
no responding	4
no responding	6
no responding	0
no responding	1
no responding	0
no responding	0
no responding	1
no responding	9
no responding	7
no responding	0
no responding	1
no responding	0
no responding	3
no responding	1
no responding	11
no responding	5
no responding	0
no responding	1
no responding	3
no responding	0
no responding	0
no responding	0
no responding	1
no responding	3
no responding	1
no responding	4
no responding	1
no responding	1
no responding	7
no responding	0
no responding	1
no responding	6
no responding	5
no responding	0
no responding	0
no responding	0
no responding	5
no responding	4
no responding	0
no responding	0
no responding	1
no responding	2
no responding	2
no responding	2
no responding	0
no responding	0
no responding	3
no responding	0
no responding	0
no responding	1
no responding	0
no responding	6
no responding	1
no responding	2
no responding	3
no responding	0
no responding	0
no responding	1
no responding	0
no responding	0
no responding	0
no responding	1
no responding	2
no responding	5
no responding	2
no responding	0
no responding	1
no responding	0
no responding	3
no responding	0
no responding	3
no responding	1
no responding	0
no responding	4
no responding	4
no responding	5
no responding	4
no responding	3
no responding	2
no responding	3
no responding	6
no responding	3
no responding	1
no responding	1
no responding	1
no responding	2
no responding	4
no responding	0
no responding	3
no responding	0
no responding	1
no responding	1
no responding	4
no responding	2
no responding	2
no responding	4
no responding	0
no responding	1
no responding	4
no responding	4
no responding	3
no responding	0
no responding	3
no responding	3
no responding	3
no responding	1
no responding	0
no responding	0
no responding	0
no responding	2
no responding	1
no responding	0
no responding	2
no responding	2
no responding	1
no responding	3
no responding	1
no responding	2
no responding	0
no responding	3
no responding	0
no responding	4
no responding	0
no responding	6
no responding	0
no responding	5
no responding	0
no responding	4
no responding	0
no responding	0
no responding	1
no responding	3
no responding	3
no responding	1
no responding	0
no responding	1
no responding	0
no responding	0
no responding	0
no responding	0
no responding	0
no responding	5
no responding	1
no responding	2
no responding	1
no responding	0
no responding	2
no responding	5
no responding	2
no responding	2
no responding	1
no responding	0
no responding	0
no responding	3
no responding	0
no responding	0
no responding	2
no responding	1
no responding	0
no responding	0
no responding	0
no responding	1
no responding	0
no responding	0
no responding	0
no responding	0
no responding	2
no responding	1
no responding	1
no responding	1
no responding	0
no responding	0
no responding	0
no responding	2
no responding	3
no responding	0
no responding	1
no responding	2
no responding	1
no responding	3
no responding	0
no responding	1
no responding	1
no responding	0
no responding	1
no responding	1
no responding	1
no responding	1
no responding	0
no responding	0
no responding	0
no responding	0
no responding	1
no responding	0
no responding	1
no responding	1
no responding	1
no responding	3
no responding	0
no responding	0
no responding	1
no responding	0
no responding	1
no responding	3
no responding	0
no responding	2
no responding	0
no responding	0
no responding	0
no responding	1
no responding	1
no responding	1
no responding	0
no responding	0
no responding	0
no responding	2
no responding	0
no responding	0
no responding	0
no responding	3
no responding	0
no responding	0
no responding	0
no responding	0
no responding	11
no responding	5
no responding	16
no responding	2
no responding	3
no responding	26
no responding	27
no responding	2
no responding	11
no responding	20
no responding	0
no responding	0
no responding	4
no responding	2
no responding	7
no responding	4
no responding	1
no responding	3
no responding	0
no responding	0
no responding	1
no responding	0
no responding	6
no responding	21
no responding	0
no responding	0
no responding	0
no responding	0
no responding	0
no responding	0
no responding	0
no responding	0
no responding	0
no responding	0
no responding	0
no responding	0
no responding	13
no responding	3
no responding	12
no responding	2
no responding	4
no responding	3
no responding	8
no responding	9
no responding	6
no responding	6
no responding	0
no responding	2
no responding	9
no responding	0
no responding	0
no responding	9
no responding	4
no responding	5
no responding	3
no responding	8
no responding	3
no responding	4
no responding	4
no responding	4
no responding	4
no responding	1
no responding	2
no responding	5
no responding	3
no responding	1
no responding	8
no responding	5
no responding	1
no responding	2
no responding	1
no responding	8
no responding	9
no responding	2
no responding	8
no responding	1
no responding	2
no responding	4
no responding	2
divergent responding	10
divergent responding	37
divergent responding	17
divergent responding	4
divergent responding	55
divergent responding	52
divergent responding	52
divergent responding	38
divergent responding	38
divergent responding	16
divergent responding	3
divergent responding	28
divergent responding	15
divergent responding	21
divergent responding	35
divergent responding	6
divergent responding	44
divergent responding	14
divergent responding	12
divergent responding	30
divergent responding	24
divergent responding	15
divergent responding	34
divergent responding	7
divergent responding	31
divergent responding	26
divergent responding	1
divergent responding	4
divergent responding	15
divergent responding	7
divergent responding	16
divergent responding	9
divergent responding	9
divergent responding	8
divergent responding	25
divergent responding	9
divergent responding	14
divergent responding	8
divergent responding	8
divergent responding	31
divergent responding	22
divergent responding	20
divergent responding	2
divergent responding	4
divergent responding	14
divergent responding	3
divergent responding	9
divergent responding	19
divergent responding	19
divergent responding	11
divergent responding	8
divergent responding	4
divergent responding	8
divergent responding	3
divergent responding	8
divergent responding	9
divergent responding	10
divergent responding	4
divergent responding	14
divergent responding	10
divergent responding	8
divergent responding	8
divergent responding	0
divergent responding	5
divergent responding	6
divergent responding	12
divergent responding	5
divergent responding	9
divergent responding	2
divergent responding	5
divergent responding	9
divergent responding	3
divergent responding	11
divergent responding	2
divergent responding	5
divergent responding	6
divergent responding	3
divergent responding	6
divergent responding	13
divergent responding	5
divergent responding	4
divergent responding	5
divergent responding	5
divergent responding	2
divergent responding	5
divergent responding	2
divergent responding	2
divergent responding	2
divergent responding	7
divergent responding	3
divergent responding	4
divergent responding	5
divergent responding	5
divergent responding	2
divergent responding	4
divergent responding	7
divergent responding	3
divergent responding	0
divergent responding	3
divergent responding	2
divergent responding	12
divergent responding	3
divergent responding	6
divergent responding	10
divergent responding	3
divergent responding	7
divergent responding	2
divergent responding	0
divergent responding	8
divergent responding	2
divergent responding	3
divergent responding	1
divergent responding	8
divergent responding	0
divergent responding	0
divergent responding	0
divergent responding	0
divergent responding	2
divergent responding	2
divergent responding	6
divergent responding	4
divergent responding	4
divergent responding	3
divergent responding	1
divergent responding	0
divergent responding	2
divergent responding	0
divergent responding	3
divergent responding	4
divergent responding	1
divergent responding	4
divergent responding	6
divergent responding	2
divergent responding	1
divergent responding	3
divergent responding	2
divergent responding	1
divergent responding	1
divergent responding	5
divergent responding	4
divergent responding	1
divergent responding	1
divergent responding	0
divergent responding	2
divergent responding	3
divergent responding	2
divergent responding	0
divergent responding	1
divergent responding	2
divergent responding	2
divergent responding	2
divergent responding	0
divergent responding	2
divergent responding	0
divergent responding	2
divergent responding	4
divergent responding	7
divergent responding	0
divergent responding	1
divergent responding	2
divergent responding	0
divergent responding	0
divergent responding	2
divergent responding	1
divergent responding	3
divergent responding	0
divergent responding	1
divergent responding	1
divergent responding	0
divergent responding	1
divergent responding	0
divergent responding	18
divergent responding	20
divergent responding	27
divergent responding	15
divergent responding	11
divergent responding	21
divergent responding	19
divergent responding	21
divergent responding	17
divergent responding	12
divergent responding	3
divergent responding	11
divergent responding	2
divergent responding	3
divergent responding	2
divergent responding	3
divergent responding	3
divergent responding	7
divergent responding	15
divergent responding	23
divergent responding	0
divergent responding	1
divergent responding	0
divergent responding	22
divergent responding	7
divergent responding	1
divergent responding	2
divergent responding	0
divergent responding	0
divergent responding	1
divergent responding	5
divergent responding	0
divergent responding	1
divergent responding	2
divergent responding	2
divergent responding	1
divergent responding	1
divergent responding	1
divergent responding	0
divergent responding	1
divergent responding	0
divergent responding	0
divergent responding	6
divergent responding	0
divergent responding	0
divergent responding	1
divergent responding	6
divergent responding	9
divergent responding	6
divergent responding	4
divergent responding	5
divergent responding	10
divergent responding	0
divergent responding	6
divergent responding	11
divergent responding	3
divergent responding	1
divergent responding	7
divergent responding	3
divergent responding	5
divergent responding	2
divergent responding	8
divergent responding	4
divergent responding	7
divergent responding	10
divergent responding	5
divergent responding	1
divergent responding	5
divergent responding	1
consistent responding	2
consistent responding	10
consistent responding	4
consistent responding	5
consistent responding	2
consistent responding	4
consistent responding	4
consistent responding	2
consistent responding	7
consistent responding	0
consistent responding	0
consistent responding	2
consistent responding	2
consistent responding	0
consistent responding	0
consistent responding	0
consistent responding	3
consistent responding	1
consistent responding	0
consistent responding	2
consistent responding	3
consistent responding	5
consistent responding	2
consistent responding	0
consistent responding	3
consistent responding	1
