# Supplementary material for: Systematic Analysis of Time-Series Gene Expression Data on Tumor Cell-Selective Apoptotic Responses to HDAC Inhibitors
Source: Comput Math Methods Med. 2014 Oct 13;2014:867289. doi: 10.1155/2014/867289 (PMC4211306; doi:10.1155/2014/867289)
Supplement: Supplementary file 1 — Table S1. H-score of all pathways for tumor and normal samples: This table lists the name, category, website and H-score values for all 1307 pathway. Table S2. Illustrative pathways belonging to term "No responding": This table lists the name, category, website and TVPC patterns for "No responding" pathways. Table S3. Illustrative pathways belonging to term "Consistent responding": This table lists the name, category, website and TVPC patterns for "Consistent responding" pathways. Table S4. Illustrative pathways belonging to term "Tumor specific responding": This table lists the name, category, website and TVPC patterns for "Tumor specific responding" pathways. Table S5. Illustrative pathways belonging to term "Normal specific responding": This table lists the name, category, web site and TVPC patterns for "Normal specific responding" pathways. Table S6. Illustrative pathways belonging to term "Divergent responding": This table lists the name, category, website and TVPC patterns for "Divergent responding" pathways. Table S7. Genes within profile #0 for normal samples: This table contains all genes within profile #0 for normal samples, and lists the normalized expression data to the right of gene symbol. Table S8. Genes within profile #2 for normal samples: This table contains all genes within profile #2 for normal samples, and lists the normalized expression data to the right of gene symbol. Table S9. Genes within profile #9 for normal samples: This table contains all genes within profile #9 for normal samples, and lists the normalized expression data to the right of gene symbol. Table S10. Genes within profile #12 for normal samples: This table contains all genes within profile # 12 for normal samples, and lists the normalized expression data to the right of gene symbol. Table S11. Genes within profile #14 for normal samples: This table contains all genes within profile #14 for normal samples, and lists the normalized expression data to the right of gene symbol. Ta [file 867289.f1.zip › 867289.f1/Table S4.xls]

## Sheet: Sheet1
Pathway name	Categories	NO.all	NO.in	Web site	Pattern-tumor	Pattern-normal	Term	OMIC gene counts
GO MITOCHONDRIAL MATRIX	Cellular component	46	46	http://www.broadinstitute.org/gsea/msigdb/cards/MITOCHONDRIAL_MATRIX	0111	1111	tumor specific responding	0
GO MITOCHONDRIAL LUMEN	Cellular component	46	46	http://www.broadinstitute.org/gsea/msigdb/cards/MITOCHONDRIAL_LUMEN	0111	1111	tumor specific responding	0
KEGG OXIDATIVE PHOSPHORYLATION	Metabolism	135	110	http://www.broadinstitute.org/gsea/msigdb/cards/KEGG_OXIDATIVE_PHOSPHORYLATION	0111	1111	tumor specific responding	4
KEGG PARKINSONS DISEASE	Human Diseases	133	106	http://www.broadinstitute.org/gsea/msigdb/cards/KEGG_PARKINSONS_DISEASE	0111	1111	tumor specific responding	4
GO INTRACELLULAR TRANSPORT	Biological process	280	255	http://www.broadinstitute.org/gsea/msigdb/cards/INTRACELLULAR_TRANSPORT	0111	0000	tumor specific responding	19
GO CYTOSKELETON ORGANIZATION AND BIOGENESIS	Biological process	208	195	http://www.broadinstitute.org/gsea/msigdb/cards/CYTOSKELETON_ORGANIZATION_AND_BIOGENESIS	0111	0000	tumor specific responding	12
GO CYTOSKELETAL PROTEIN BINDING	Molecular function	159	148	http://www.broadinstitute.org/gsea/msigdb/cards/CYTOSKELETAL_PROTEIN_BINDING	0111	0000	tumor specific responding	7
GO ACTIN BINDING	Molecular function	76	69	http://www.broadinstitute.org/gsea/msigdb/cards/ACTIN_BINDING	0111	0000	tumor specific responding	3
GO PROTEIN IMPORT INTO NUCLEUS	Biological process	48	42	http://www.broadinstitute.org/gsea/msigdb/cards/PROTEIN_IMPORT_INTO_NUCLEUS	0111	0000	tumor specific responding	7
GO CELL CORTEX	Cellular component	39	37	http://www.broadinstitute.org/gsea/msigdb/cards/CELL_CORTEX	0111	0000	tumor specific responding	4
GO EXOPEPTIDASE ACTIVITY	Molecular function	32	28	http://www.broadinstitute.org/gsea/msigdb/cards/EXOPEPTIDASE_ACTIVITY	0111	0000	tumor specific responding	0
KEGG REGULATION OF ACTIN CYTOSKELETON	Cellular Processes	216	196	http://www.broadinstitute.org/gsea/msigdb/cards/KEGG_REGULATION_OF_ACTIN_CYTOSKELETON	0111	0000	tumor specific responding	23
KEGG AXON GUIDANCE	Organismal Systems	129	127	http://www.broadinstitute.org/gsea/msigdb/cards/KEGG_AXON_GUIDANCE	0111	0000	tumor specific responding	8
KEGG VEGF SIGNALING PATHWAY	Environmental Information Processing	76	71	http://www.broadinstitute.org/gsea/msigdb/cards/KEGG_VEGF_SIGNALING_PATHWAY	0111	0000	tumor specific responding	12
BIOCARTA TCR PATHWAY	Cell Activation-Cell Signaling -Immunology	49	44	http://www.broadinstitute.org/gsea/msigdb/cards/BIOCARTA_TCR_PATHWAY	0111	0000	tumor specific responding	11
BIOCARTA FMLP PATHWAY	Cell Signaling-Cytokines/Chemokines- Immunology	39	34	http://www.broadinstitute.org/gsea/msigdb/cards/BIOCARTA_FMLP_PATHWAY	0111	0000	tumor specific responding	5
BIOCARTA BCR PATHWAY	Cell Signaling – Immunology	37	33	http://www.broadinstitute.org/gsea/msigdb/cards/BIOCARTA_BCR_PATHWAY	0111	0000	tumor specific responding	8
BIOCARTA UCALPAIN PATHWAY	Adhesion	18	16	http://www.broadinstitute.org/gsea/msigdb/cards/BIOCARTA_UCALPAIN_PATHWAY	0111	0000	tumor specific responding	2
KEGG NOTCH SIGNALING PATHWAY	Environmental Information Processing	47	41	http://www.broadinstitute.org/gsea/msigdb/cards/KEGG_NOTCH_SIGNALING_PATHWAY	1110	0000	tumor specific responding	5
BIOCARTA IL6 PATHWAY	Cell Signaling – Cytokines/Chemokines – Immunology	22	22	http://www.broadinstitute.org/gsea/msigdb/cards/BIOCARTA_IL6_PATHWAY	1110	0000	tumor specific responding	10
GO NEUROLOGICAL SYSTEM PROCESS	Biological process	379	359	http://www.broadinstitute.org/gsea/msigdb/cards/NEUROLOGICAL_SYSTEM_PROCESS	1101	0000	tumor specific responding	4
GO SEQUENCE SPECIFIC DNA BINDING	Molecular function	58	48	http://www.broadinstitute.org/gsea/msigdb/cards/SEQUENCE_SPECIFIC_DNA_BINDING	1101	0000	tumor specific responding	6
GO RECEPTOR SIGNALING PROTEIN SERINE THREONINE KINASE ACTIVITY	Molecular function	34	34	http://www.broadinstitute.org/gsea/msigdb/cards/RECEPTOR_SIGNALING_PROTEIN_SERINE_THREONINE_KINASE_ACTIVITY	1101	0000	tumor specific responding	0
BIOCARTA CARDIACEGF PATHWAY	Cell Signaling	18	17	http://www.broadinstitute.org/gsea/msigdb/cards/BIOCARTA_CARDIACEGF_PATHWAY	1101	0000	tumor specific responding	4
GO MAPKKK CASCADE GO 0000165	Biological process	104	98	http://www.broadinstitute.org/gsea/msigdb/cards/MAPKKK_CASCADE_GO_0000165	1100	0000	tumor specific responding	6
GO POSITIVE REGULATION OF TRANSFERASE ACTIVITY	Biological process	86	76	http://www.broadinstitute.org/gsea/msigdb/cards/POSITIVE_REGULATION_OF_TRANSFERASE_ACTIVITY	1100	0000	tumor specific responding	8
GO PROTEIN AMINO ACID DEPHOSPHORYLATION	Biological process	63	63	http://www.broadinstitute.org/gsea/msigdb/cards/PROTEIN_AMINO_ACID_DEPHOSPHORYLATION	1100	0000	tumor specific responding	2
GO CARBOHYDRATE BIOSYNTHETIC PROCESS	Biological process	49	44	http://www.broadinstitute.org/gsea/msigdb/cards/CARBOHYDRATE_BIOSYNTHETIC_PROCESS	1100	0000	tumor specific responding	2
GO DOUBLE STRANDED DNA BINDING	Molecular function	32	31	http://www.broadinstitute.org/gsea/msigdb/cards/DOUBLE_STRANDED_DNA_BINDING	1100	0000	tumor specific responding	7
GO CARBOHYDRATE TRANSMEMBRANE TRANSPORTER ACTIVITY	Molecular function	16	16	http://www.broadinstitute.org/gsea/msigdb/cards/CARBOHYDRATE_TRANSMEMBRANE_TRANSPORTER_ACTIVITY	1100	0000	tumor specific responding	0
KEGG TOLL LIKE RECEPTOR SIGNALING PATHWAY	Organismal Systems	102	98	http://www.broadinstitute.org/gsea/msigdb/cards/KEGG_TOLL_LIKE_RECEPTOR_SIGNALING_PATHWAY	1100	0000	tumor specific responding	10
GO NUCLEAR PART	Cellular component	579	487	http://www.broadinstitute.org/gsea/msigdb/cards/NUCLEAR_PART	1011	1111	tumor specific responding	49
GO RESPONSE TO OXIDATIVE STRESS	Biological process	46	43	http://www.broadinstitute.org/gsea/msigdb/cards/RESPONSE_TO_OXIDATIVE_STRESS	1011	1111	tumor specific responding	2
KEGG GLUTATHIONE METABOLISM	Metabolism	50	45	http://www.broadinstitute.org/gsea/msigdb/cards/KEGG_GLUTATHIONE_METABOLISM	1011	1111	tumor specific responding	2
GO CELLULAR COMPONENT ASSEMBLY	Biological process	298	253	http://www.broadinstitute.org/gsea/msigdb/cards/CELLULAR_COMPONENT_ASSEMBLY	1011	0000	tumor specific responding	27
GO TRANSMISSION OF NERVE IMPULSE	Biological process	189	181	http://www.broadinstitute.org/gsea/msigdb/cards/TRANSMISSION_OF_NERVE_IMPULSE	1011	0000	tumor specific responding	2
GO SYNAPTIC TRANSMISSION	Biological process	174	166	http://www.broadinstitute.org/gsea/msigdb/cards/SYNAPTIC_TRANSMISSION	1011	0000	tumor specific responding	1
KEGG INSULIN SIGNALING PATHWAY	Organismal Systems	137	131	http://www.broadinstitute.org/gsea/msigdb/cards/KEGG_INSULIN_SIGNALING_PATHWAY	1011	0000	tumor specific responding	18
KEGG ERBB SIGNALING PATHWAY	Environmental Information Processing	87	85	http://www.broadinstitute.org/gsea/msigdb/cards/KEGG_ERBB_SIGNALING_PATHWAY	1011	0000	tumor specific responding	21
KEGG PANCREATIC CANCER	Human Diseases	70	69	http://www.broadinstitute.org/gsea/msigdb/cards/KEGG_PANCREATIC_CANCER	1011	0000	tumor specific responding	21
KEGG NOD LIKE RECEPTOR SIGNALING PATHWAY	Organismal Systems	62	51	http://www.broadinstitute.org/gsea/msigdb/cards/KEGG_NOD_LIKE_RECEPTOR_SIGNALING_PATHWAY	1011	0000	tumor specific responding	2
BIOCARTA NFAT PATHWAY	Expression-Cell Signaling	56	53	http://www.broadinstitute.org/gsea/msigdb/cards/BIOCARTA_NFAT_PATHWAY	1011	0000	tumor specific responding	8
BIOCARTA AT1R PATHWAY	Cell Signaling -Hematopoiesis	36	31	http://www.broadinstitute.org/gsea/msigdb/cards/BIOCARTA_AT1R_PATHWAY	1011	0000	tumor specific responding	9
BIOCARTA PYK2 PATHWAY	Cell Signaling	31	26	http://www.broadinstitute.org/gsea/msigdb/cards/BIOCARTA_PYK2_PATHWAY	1011	0000	tumor specific responding	8
BIOCARTA CREB PATHWAY	Cell Signaling – Expression – Neuroscience	27	26	http://www.broadinstitute.org/gsea/msigdb/cards/BIOCARTA_CREB_PATHWAY	1011	0000	tumor specific responding	8
GO RESPONSE TO CHEMICAL STIMULUS	Biological process	314	289	http://www.broadinstitute.org/gsea/msigdb/cards/RESPONSE_TO_CHEMICAL_STIMULUS	1010	0000	tumor specific responding	16
GO POSITIVE REGULATION OF CELLULAR PROTEIN METABOLIC PROCESS	Biological process	73	68	http://www.broadinstitute.org/gsea/msigdb/cards/POSITIVE_REGULATION_OF_CELLULAR_PROTEIN_METABOLIC_PROCESS	1010	0000	tumor specific responding	7
GO MAGNESIUM ION BINDING	Molecular function	62	54	http://www.broadinstitute.org/gsea/msigdb/cards/MAGNESIUM_ION_BINDING	1010	0000	tumor specific responding	5
GO PROTEIN RNA COMPLEX ASSEMBLY	Biological process	67	44	http://www.broadinstitute.org/gsea/msigdb/cards/PROTEIN_RNA_COMPLEX_ASSEMBLY	1010	0000	tumor specific responding	3
GO VIRAL REPRODUCTION	Biological process	41	40	http://www.broadinstitute.org/gsea/msigdb/cards/VIRAL_REPRODUCTION	1010	0000	tumor specific responding	2
GO VIRAL REPRODUCTIVE PROCESS	Biological process	36	35	http://www.broadinstitute.org/gsea/msigdb/cards/VIRAL_REPRODUCTIVE_PROCESS	1010	0000	tumor specific responding	2
GO VIRAL INFECTIOUS CYCLE	Biological process	32	31	http://www.broadinstitute.org/gsea/msigdb/cards/VIRAL_INFECTIOUS_CYCLE	1010	0000	tumor specific responding	2
GO DNA PACKAGING	Biological process	35	31	http://www.broadinstitute.org/gsea/msigdb/cards/DNA_PACKAGING	1010	0000	tumor specific responding	1
GO NEURON APOPTOSIS	Biological process	17	16	http://www.broadinstitute.org/gsea/msigdb/cards/NEURON_APOPTOSIS	1010	0000	tumor specific responding	2
GO DRUG BINDING	Molecular function	16	15	http://www.broadinstitute.org/gsea/msigdb/cards/DRUG_BINDING	1010	0000	tumor specific responding	0
KEGG CHEMOKINE SIGNALING PATHWAY	Organismal Systems	190	173	http://www.broadinstitute.org/gsea/msigdb/cards/KEGG_CHEMOKINE_SIGNALING_PATHWAY	1010	0000	tumor specific responding	16
KEGG CELL ADHESION MOLECULES CAMS	Environmental Information Processing	134	125	http://www.broadinstitute.org/gsea/msigdb/cards/KEGG_CELL_ADHESION_MOLECULES_CAMS	1010	0000	tumor specific responding	3
BIOCARTA FCER1 PATHWAY	Cell Signaling – Immunology	41	37	http://www.broadinstitute.org/gsea/msigdb/cards/BIOCARTA_FCER1_PATHWAY	1010	0000	tumor specific responding	8
BIOCARTA BARRESTIN SRC PATHWAY	Cell Signaling	15	15	http://www.broadinstitute.org/gsea/msigdb/cards/BIOCARTA_BARRESTIN_SRC_PATHWAY	1010	0000	tumor specific responding	5
GO ORGANELLE LUMEN	Cellular component	458	391	http://www.broadinstitute.org/gsea/msigdb/cards/ORGANELLE_LUMEN	1001	1111	tumor specific responding	35
GO MEMBRANE ENCLOSED LUMEN	Cellular component	458	391	http://www.broadinstitute.org/gsea/msigdb/cards/MEMBRANE_ENCLOSED_LUMEN	1001	1111	tumor specific responding	35
GO PROTEIN KINASE CASCADE	Biological process	293	273	http://www.broadinstitute.org/gsea/msigdb/cards/PROTEIN_KINASE_CASCADE	1001	0000	tumor specific responding	19
GO G PROTEIN COUPLED RECEPTOR ACTIVITY	Molecular function	191	177	http://www.broadinstitute.org/gsea/msigdb/cards/G_PROTEIN_COUPLED_RECEPTOR_ACTIVITY	1001	0000	tumor specific responding	3
GO ENZYME BINDING	Molecular function	178	163	http://www.broadinstitute.org/gsea/msigdb/cards/ENZYME_BINDING	1001	0000	tumor specific responding	16
GO RHODOPSIN LIKE RECEPTOR ACTIVITY	Molecular function	134	125	http://www.broadinstitute.org/gsea/msigdb/cards/RHODOPSIN_LIKE_RECEPTOR_ACTIVITY	1001	0000	tumor specific responding	3
GO CYTOKINE ACTIVITY	Molecular function	113	104	http://www.broadinstitute.org/gsea/msigdb/cards/CYTOKINE_ACTIVITY	1001	0000	tumor specific responding	3
GO LIPID BIOSYNTHETIC PROCESS	Biological process	97	87	http://www.broadinstitute.org/gsea/msigdb/cards/LIPID_BIOSYNTHETIC_PROCESS	1001	0000	tumor specific responding	2
GO INTRINSIC TO ORGANELLE MEMBRANE	Cellular component	52	44	http://www.broadinstitute.org/gsea/msigdb/cards/INTRINSIC_TO_ORGANELLE_MEMBRANE	1001	0000	tumor specific responding	2
GO INTEGRAL TO ORGANELLE MEMBRANE	Cellular component	50	42	http://www.broadinstitute.org/gsea/msigdb/cards/INTEGRAL_TO_ORGANELLE_MEMBRANE	1001	0000	tumor specific responding	2
GO MEMBRANE LIPID BIOSYNTHETIC PROCESS	Biological process	49	40	http://www.broadinstitute.org/gsea/msigdb/cards/MEMBRANE_LIPID_BIOSYNTHETIC_PROCESS	1001	0000	tumor specific responding	0
GO REGULATION OF ORGANELLE ORGANIZATION AND BIOGENESIS	Biological process	40	37	http://www.broadinstitute.org/gsea/msigdb/cards/REGULATION_OF_ORGANELLE_ORGANIZATION_AND_BIOGENESIS	1001	0000	tumor specific responding	5
GO PHOSPHOLIPID BIOSYNTHETIC PROCESS	Biological process	39	32	http://www.broadinstitute.org/gsea/msigdb/cards/PHOSPHOLIPID_BIOSYNTHETIC_PROCESS	1001	0000	tumor specific responding	0
GO GLYCEROPHOSPHOLIPID BIOSYNTHETIC PROCESS	Biological process	30	26	http://www.broadinstitute.org/gsea/msigdb/cards/GLYCEROPHOSPHOLIPID_BIOSYNTHETIC_PROCESS	1001	0000	tumor specific responding	0
GO INTRINSIC TO ENDOPLASMIC RETICULUM MEMBRANE	Cellular component	24	21	http://www.broadinstitute.org/gsea/msigdb/cards/INTRINSIC_TO_ENDOPLASMIC_RETICULUM_MEMBRANE	1001	0000	tumor specific responding	1
GO INTEGRAL TO ENDOPLASMIC RETICULUM MEMBRANE	Cellular component	24	21	http://www.broadinstitute.org/gsea/msigdb/cards/INTEGRAL_TO_ENDOPLASMIC_RETICULUM_MEMBRANE	1001	0000	tumor specific responding	1
GO PROTEIN POLYMERIZATION	Biological process	19	18	http://www.broadinstitute.org/gsea/msigdb/cards/PROTEIN_POLYMERIZATION	1001	0000	tumor specific responding	1
GO SULFURIC ESTER HYDROLASE ACTIVITY	Molecular function	16	15	http://www.broadinstitute.org/gsea/msigdb/cards/SULFURIC_ESTER_HYDROLASE_ACTIVITY	1001	0000	tumor specific responding	0
KEGG FRUCTOSE AND MANNOSE METABOLISM	Metabolism	34	34	http://www.broadinstitute.org/gsea/msigdb/cards/KEGG_FRUCTOSE_AND_MANNOSE_METABOLISM	1001	0000	tumor specific responding	0
BIOCARTA AGR PATHWAY	Cell Signaling-Developmental Biology	36	35	http://www.broadinstitute.org/gsea/msigdb/cards/BIOCARTA_AGR_PATHWAY	1001	0000	tumor specific responding	3
GO DNA METABOLIC PROCESS	Biological process	257	232	http://www.broadinstitute.org/gsea/msigdb/cards/DNA_METABOLIC_PROCESS	1000	1111	tumor specific responding	33
GO RESPONSE TO DNA DAMAGE STIMULUS	Biological process	162	148	http://www.broadinstitute.org/gsea/msigdb/cards/RESPONSE_TO_DNA_DAMAGE_STIMULUS	1000	1111	tumor specific responding	29
GO DNA REPAIR	Biological process	125	117	http://www.broadinstitute.org/gsea/msigdb/cards/DNA_REPAIR	1000	1111	tumor specific responding	23
GO ONE CARBON COMPOUND METABOLIC PROCESS	Biological process	26	26	http://www.broadinstitute.org/gsea/msigdb/cards/ONE_CARBON_COMPOUND_METABOLIC_PROCESS	1000	1111	tumor specific responding	4
KEGG DNA REPLICATION	Genetic Information Processing	36	34	http://www.broadinstitute.org/gsea/msigdb/cards/KEGG_DNA_REPLICATION	1000	1111	tumor specific responding	0
KEGG MISMATCH REPAIR	Genetic Information Processing	23	22	http://www.broadinstitute.org/gsea/msigdb/cards/KEGG_MISMATCH_REPAIR	1000	1111	tumor specific responding	4
GO REGULATION OF TRANSCRIPTION	Biological process	566	497	http://www.broadinstitute.org/gsea/msigdb/cards/REGULATION_OF_TRANSCRIPTION	1000	0000	tumor specific responding	61
GO REGULATION OF BIOLOGICAL QUALITY	Biological process	419	383	http://www.broadinstitute.org/gsea/msigdb/cards/REGULATION_OF_BIOLOGICAL_QUALITY	1000	0000	tumor specific responding	24
GO LIPID METABOLIC PROCESS	Biological process	325	287	http://www.broadinstitute.org/gsea/msigdb/cards/LIPID_METABOLIC_PROCESS	1000	0000	tumor specific responding	5
GO REGULATION OF CELL PROLIFERATION	Biological process	308	280	http://www.broadinstitute.org/gsea/msigdb/cards/REGULATION_OF_CELL_PROLIFERATION	1000	0000	tumor specific responding	26
GO NEGATIVE REGULATION OF METABOLIC PROCESS	Biological process	262	230	http://www.broadinstitute.org/gsea/msigdb/cards/NEGATIVE_REGULATION_OF_METABOLIC_PROCESS	1000	0000	tumor specific responding	27
GO NEGATIVE REGULATION OF CELLULAR METABOLIC PROCESS	Biological process	259	227	http://www.broadinstitute.org/gsea/msigdb/cards/NEGATIVE_REGULATION_OF_CELLULAR_METABOLIC_PROCESS	1000	0000	tumor specific responding	27
GO POSITIVE REGULATION OF METABOLIC PROCESS	Biological process	236	204	http://www.broadinstitute.org/gsea/msigdb/cards/POSITIVE_REGULATION_OF_METABOLIC_PROCESS	1000	0000	tumor specific responding	23
GO POSITIVE REGULATION OF CELLULAR METABOLIC PROCESS	Biological process	229	197	http://www.broadinstitute.org/gsea/msigdb/cards/POSITIVE_REGULATION_OF_CELLULAR_METABOLIC_PROCESS	1000	0000	tumor specific responding	23
GO HOMEOSTATIC PROCESS	Biological process	207	191	http://www.broadinstitute.org/gsea/msigdb/cards/HOMEOSTATIC_PROCESS	1000	0000	tumor specific responding	10
GO PURINE RIBONUCLEOTIDE BINDING	Molecular function	205	187	http://www.broadinstitute.org/gsea/msigdb/cards/PURINE_RIBONUCLEOTIDE_BINDING	1000	0000	tumor specific responding	8
GO PROTEIN DIMERIZATION ACTIVITY	Molecular function	182	171	http://www.broadinstitute.org/gsea/msigdb/cards/PROTEIN_DIMERIZATION_ACTIVITY	1000	0000	tumor specific responding	15
GO RNA POLYMERASE II TRANSCRIPTION FACTOR ACTIVITY	Molecular function	182	166	http://www.broadinstitute.org/gsea/msigdb/cards/RNA_POLYMERASE_II_TRANSCRIPTION_FACTOR_ACTIVITY	1000	0000	tumor specific responding	16
GO TRANSCRIPTION ACTIVATOR ACTIVITY	Molecular function	173	151	http://www.broadinstitute.org/gsea/msigdb/cards/TRANSCRIPTION_ACTIVATOR_ACTIVITY	1000	0000	tumor specific responding	26
GO REGULATION OF PROTEIN METABOLIC PROCESS	Biological process	173	150	http://www.broadinstitute.org/gsea/msigdb/cards/REGULATION_OF_PROTEIN_METABOLIC_PROCESS	1000	0000	tumor specific responding	16
GO CELLULAR HOMEOSTASIS	Biological process	147	133	http://www.broadinstitute.org/gsea/msigdb/cards/CELLULAR_HOMEOSTASIS	1000	0000	tumor specific responding	4
GO POSITIVE REGULATION OF CELL PROLIFERATION	Biological process	149	132	http://www.broadinstitute.org/gsea/msigdb/cards/POSITIVE_REGULATION_OF_CELL_PROLIFERATION	1000	0000	tumor specific responding	9
GO POSITIVE REGULATION OF NUCLEOBASENUCLEOSIDENUCLEOTIDE AND NUCLEIC ACID METABOLIC PROCESS	Biological process	154	129	http://www.broadinstitute.org/gsea/msigdb/cards/POSITIVE_REGULATION_OF_NUCLEOBASENUCLEOSIDENUCLEOTIDE_AND_NUCLEIC_ACID_METABOLIC_PROCESS	1000	0000	tumor specific responding	18
GO ION HOMEOSTASIS	Biological process	129	117	http://www.broadinstitute.org/gsea/msigdb/cards/ION_HOMEOSTASIS	1000	0000	tumor specific responding	3
GO ENZYME INHIBITOR ACTIVITY	Molecular function	119	116	http://www.broadinstitute.org/gsea/msigdb/cards/ENZYME_INHIBITOR_ACTIVITY	1000	0000	tumor specific responding	4
GO RESPONSE TO BIOTIC STIMULUS	Biological process	120	110	http://www.broadinstitute.org/gsea/msigdb/cards/RESPONSE_TO_BIOTIC_STIMULUS	1000	0000	tumor specific responding	5
GO VESICLE	Cellular component	124	109	http://www.broadinstitute.org/gsea/msigdb/cards/VESICLE	1000	0000	tumor specific responding	4
GO PHOSPHORIC MONOESTER HYDROLASE ACTIVITY	Molecular function	112	107	http://www.broadinstitute.org/gsea/msigdb/cards/PHOSPHORIC_MONOESTER_HYDROLASE_ACTIVITY	1000	0000	tumor specific responding	4
GO CYTOPLASMIC VESICLE	Cellular component	119	105	http://www.broadinstitute.org/gsea/msigdb/cards/CYTOPLASMIC_VESICLE	1000	0000	tumor specific responding	4
GO MEMBRANE BOUND VESICLE	Cellular component	117	104	http://www.broadinstitute.org/gsea/msigdb/cards/MEMBRANE_BOUND_VESICLE	1000	0000	tumor specific responding	4
GO SECRETION BY CELL	Biological process	116	100	http://www.broadinstitute.org/gsea/msigdb/cards/SECRETION_BY_CELL	1000	0000	tumor specific responding	0
GO CATION HOMEOSTASIS	Biological process	109	99	http://www.broadinstitute.org/gsea/msigdb/cards/CATION_HOMEOSTASIS	1000	0000	tumor specific responding	3
GO MEMBRANE LIPID METABOLIC PROCESS	Biological process	101	87	http://www.broadinstitute.org/gsea/msigdb/cards/MEMBRANE_LIPID_METABOLIC_PROCESS	1000	0000	tumor specific responding	2
GO NUCLEAR ENVELOPE ENDOPLASMIC RETICULUM NETWORK	Cellular component	94	83	http://www.broadinstitute.org/gsea/msigdb/cards/NUCLEAR_ENVELOPE_ENDOPLASMIC_RETICULUM_NETWORK	1000	0000	tumor specific responding	6
GO SECRETORY PATHWAY	Biological process	84	77	http://www.broadinstitute.org/gsea/msigdb/cards/SECRETORY_PATHWAY	1000	0000	tumor specific responding	0
GO REGULATION OF TRANSPORT	Biological process	67	62	http://www.broadinstitute.org/gsea/msigdb/cards/REGULATION_OF_TRANSPORT	1000	0000	tumor specific responding	6
GO LYTIC VACUOLE	Cellular component	61	55	http://www.broadinstitute.org/gsea/msigdb/cards/LYTIC_VACUOLE	1000	0000	tumor specific responding	2
GO LYSOSOME	Cellular component	61	55	http://www.broadinstitute.org/gsea/msigdb/cards/LYSOSOME	1000	0000	tumor specific responding	2
GO REGULATION OF BODY FLUID LEVELS	Biological process	57	55	http://www.broadinstitute.org/gsea/msigdb/cards/REGULATION_OF_BODY_FLUID_LEVELS	1000	0000	tumor specific responding	3
GO CYTOKINE BINDING	Molecular function	48	46	http://www.broadinstitute.org/gsea/msigdb/cards/CYTOKINE_BINDING	1000	0000	tumor specific responding	4
GO PROTEASE INHIBITOR ACTIVITY	Molecular function	41	41	http://www.broadinstitute.org/gsea/msigdb/cards/PROTEASE_INHIBITOR_ACTIVITY	1000	0000	tumor specific responding	0
GO MICROSOME	Cellular component	42	39	http://www.broadinstitute.org/gsea/msigdb/cards/MICROSOME	1000	0000	tumor specific responding	0
GO REGULATION OF PROTEIN MODIFICATION PROCESS	Biological process	44	39	http://www.broadinstitute.org/gsea/msigdb/cards/REGULATION_OF_PROTEIN_MODIFICATION_PROCESS	1000	0000	tumor specific responding	10
GO GLYCEROPHOSPHOLIPID METABOLIC PROCESS	Biological process	46	39	http://www.broadinstitute.org/gsea/msigdb/cards/GLYCEROPHOSPHOLIPID_METABOLIC_PROCESS	1000	0000	tumor specific responding	2
GO LIPOPROTEIN METABOLIC PROCESS	Biological process	33	32	http://www.broadinstitute.org/gsea/msigdb/cards/LIPOPROTEIN_METABOLIC_PROCESS	1000	0000	tumor specific responding	0
GO EXTRACELLULAR STRUCTURE ORGANIZATION AND BIOGENESIS	Biological process	32	30	http://www.broadinstitute.org/gsea/msigdb/cards/EXTRACELLULAR_STRUCTURE_ORGANIZATION_AND_BIOGENESIS	1000	0000	tumor specific responding	2
GO MEMBRANE FUSION	Biological process	28	27	http://www.broadinstitute.org/gsea/msigdb/cards/MEMBRANE_FUSION	1000	0000	tumor specific responding	0
GO POSITIVE REGULATION OF PHOSPHATE METABOLIC PROCESS	Biological process	28	25	http://www.broadinstitute.org/gsea/msigdb/cards/POSITIVE_REGULATION_OF_PHOSPHATE_METABOLIC_PROCESS	1000	0000	tumor specific responding	5
GO LIPOPROTEIN BIOSYNTHETIC PROCESS	Biological process	26	25	http://www.broadinstitute.org/gsea/msigdb/cards/LIPOPROTEIN_BIOSYNTHETIC_PROCESS	1000	0000	tumor specific responding	0
GO PHOSPHOINOSITIDE METABOLIC PROCESS	Biological process	31	24	http://www.broadinstitute.org/gsea/msigdb/cards/PHOSPHOINOSITIDE_METABOLIC_PROCESS	1000	0000	tumor specific responding	2
GO POSITIVE REGULATION OF PHOSPHORYLATION	Biological process	26	23	http://www.broadinstitute.org/gsea/msigdb/cards/POSITIVE_REGULATION_OF_PHOSPHORYLATION	1000	0000	tumor specific responding	5
GO PROTEIN AMINO ACID LIPIDATION	Biological process	24	23	http://www.broadinstitute.org/gsea/msigdb/cards/PROTEIN_AMINO_ACID_LIPIDATION	1000	0000	tumor specific responding	0
GO SYNAPSE ORGANIZATION AND BIOGENESIS	Biological process	23	22	http://www.broadinstitute.org/gsea/msigdb/cards/SYNAPSE_ORGANIZATION_AND_BIOGENESIS	1000	0000	tumor specific responding	0
GO PHOSPHOINOSITIDE BIOSYNTHETIC PROCESS	Biological process	24	20	http://www.broadinstitute.org/gsea/msigdb/cards/PHOSPHOINOSITIDE_BIOSYNTHETIC_PROCESS	1000	0000	tumor specific responding	0
GO CELL PROJECTION PART	Cellular component	19	18	http://www.broadinstitute.org/gsea/msigdb/cards/CELL_PROJECTION_PART	1000	0000	tumor specific responding	0
GO SYNAPTOGENESIS	Biological process	18	18	http://www.broadinstitute.org/gsea/msigdb/cards/SYNAPTOGENESIS	1000	0000	tumor specific responding	0
GO NEGATIVE REGULATION OF TRANSPORT	Biological process	20	18	http://www.broadinstitute.org/gsea/msigdb/cards/NEGATIVE_REGULATION_OF_TRANSPORT	1000	0000	tumor specific responding	2
GO REGULATION OF DNA REPLICATION	Biological process	20	18	http://www.broadinstitute.org/gsea/msigdb/cards/REGULATION_OF_DNA_REPLICATION	1000	0000	tumor specific responding	1
GO APOPTOTIC NUCLEAR CHANGES	Biological process	19	18	http://www.broadinstitute.org/gsea/msigdb/cards/APOPTOTIC_NUCLEAR_CHANGES	1000	0000	tumor specific responding	2
GO CELL STRUCTURE DISASSEMBLY DURING APOPTOSIS	Biological process	18	17	http://www.broadinstitute.org/gsea/msigdb/cards/CELL_STRUCTURE_DISASSEMBLY_DURING_APOPTOSIS	1000	0000	tumor specific responding	2
GO REGULATION OF PEPTIDYL TYROSINE PHOSPHORYLATION	Biological process	18	17	http://www.broadinstitute.org/gsea/msigdb/cards/REGULATION_OF_PEPTIDYL_TYROSINE_PHOSPHORYLATION	1000	0000	tumor specific responding	3
KEGG FC EPSILON RI SIGNALING PATHWAY	Organismal Systems	79	75	http://www.broadinstitute.org/gsea/msigdb/cards/KEGG_FC_EPSILON_RI_SIGNALING_PATHWAY	1000	0000	tumor specific responding	13
KEGG COMPLEMENT AND COAGULATION CASCADES	Organismal Systems	69	66	http://www.broadinstitute.org/gsea/msigdb/cards/KEGG_COMPLEMENT_AND_COAGULATION_CASCADES	1000	0000	tumor specific responding	0
KEGG RIG I LIKE RECEPTOR SIGNALING PATHWAY	Organismal Systems	71	65	http://www.broadinstitute.org/gsea/msigdb/cards/KEGG_RIG_I_LIKE_RECEPTOR_SIGNALING_PATHWAY	1000	0000	tumor specific responding	1
KEGG TYPE II DIABETES MELLITUS	Human Diseases	47	44	http://www.broadinstitute.org/gsea/msigdb/cards/KEGG_TYPE_II_DIABETES_MELLITUS	1000	0000	tumor specific responding	3
KEGG ALDOSTERONE REGULATED SODIUM REABSORPTION	Organismal Systems	42	40	http://www.broadinstitute.org/gsea/msigdb/cards/KEGG_ALDOSTERONE_REGULATED_SODIUM_REABSORPTION	1000	0000	tumor specific responding	3
KEGG GLYCOSYLPHOSPHATIDYLINOSITOL GPI ANCHOR BIOSYNTHESIS	Metabolism	25	24	http://www.broadinstitute.org/gsea/msigdb/cards/KEGG_GLYCOSYLPHOSPHATIDYLINOSITOL_GPI_ANCHOR_BIOSYNTHESIS	1000	0000	tumor specific responding	0
KEGG NICOTINATE AND NICOTINAMIDE METABOLISM	Metabolism	24	21	http://www.broadinstitute.org/gsea/msigdb/cards/KEGG_NICOTINATE_AND_NICOTINAMIDE_METABOLISM	1000	0000	tumor specific responding	1
BIOCARTA PPARA PATHWAY	Cell Signaling-Developmental Biology	58	53	http://www.broadinstitute.org/gsea/msigdb/cards/BIOCARTA_PPARA_PATHWAY	1000	0000	tumor specific responding	9
BIOCARTA PAR1 PATHWAY	Cell Signaling	37	35	http://www.broadinstitute.org/gsea/msigdb/cards/BIOCARTA_PAR1_PATHWAY	1000	0000	tumor specific responding	4
BIOCARTA GPCR PATHWAY	Cell Signaling-Cytokines/Chemokines	37	33	http://www.broadinstitute.org/gsea/msigdb/cards/BIOCARTA_GPCR_PATHWAY	1000	0000	tumor specific responding	8
BIOCARTA IL1R PATHWAY	Cell Signaling-Cytokines/Chemokines – Immunology	33	31	http://www.broadinstitute.org/gsea/msigdb/cards/BIOCARTA_IL1R_PATHWAY	1000	0000	tumor specific responding	2
BIOCARTA TNFR1 PATHWAY	Apoptosis - Cell Signaling-Cytokines/Chemokines	29	29	http://www.broadinstitute.org/gsea/msigdb/cards/BIOCARTA_TNFR1_PATHWAY	1000	0000	tumor specific responding	3
BIOCARTA ACTINY PATHWAY	Cell Activation – Cell Signaling	20	19	http://www.broadinstitute.org/gsea/msigdb/cards/BIOCARTA_ACTINY_PATHWAY	1000	0000	tumor specific responding	2
BIOCARTA NDKDYNAMIN PATHWAY	Neuroscience	21	17	http://www.broadinstitute.org/gsea/msigdb/cards/BIOCARTA_NDKDYNAMIN_PATHWAY	1000	0000	tumor specific responding	2
BIOCARTA IL7 PATHWAY	Cell Signaling-Cytokines/Chemokines	17	17	http://www.broadinstitute.org/gsea/msigdb/cards/BIOCARTA_IL7_PATHWAY	1000	0000	tumor specific responding	9
BIOCARTA HCMV PATHWAY	Cell Signaling-Immunology	17	16	http://www.broadinstitute.org/gsea/msigdb/cards/BIOCARTA_HCMV_PATHWAY	1000	0000	tumor specific responding	7
BIOCARTA SHH PATHWAY	Cell Signaling-Developmetal Biology	16	16	http://www.broadinstitute.org/gsea/msigdb/cards/BIOCARTA_SHH_PATHWAY	1000	0000	tumor specific responding	3
GO BASEMENT MEMBRANE	Cellular component	37	34	http://www.broadinstitute.org/gsea/msigdb/cards/BASEMENT_MEMBRANE	0110	1111	tumor specific responding	0
GO PEPTIDASE ACTIVITY	Molecular function	176	159	http://www.broadinstitute.org/gsea/msigdb/cards/PEPTIDASE_ACTIVITY	0110	0000	tumor specific responding	3
GO ATPASE ACTIVITY	Molecular function	112	101	http://www.broadinstitute.org/gsea/msigdb/cards/ATPASE_ACTIVITY	0110	0000	tumor specific responding	4
GO ATPASE ACTIVITY COUPLED	Molecular function	93	85	http://www.broadinstitute.org/gsea/msigdb/cards/ATPASE_ACTIVITY_COUPLED	0110	0000	tumor specific responding	1
GO PROTEIN TYROSINE KINASE ACTIVITY	Molecular function	63	62	http://www.broadinstitute.org/gsea/msigdb/cards/PROTEIN_TYROSINE_KINASE_ACTIVITY	0110	0000	tumor specific responding	14
GO PEPTIDYL AMINO ACID MODIFICATION	Biological process	63	53	http://www.broadinstitute.org/gsea/msigdb/cards/PEPTIDYL_AMINO_ACID_MODIFICATION	0110	0000	tumor specific responding	9
GO PROTEIN PROCESSING	Biological process	49	44	http://www.broadinstitute.org/gsea/msigdb/cards/PROTEIN_PROCESSING	0110	0000	tumor specific responding	2
GO TRANSMEMBRANE RECEPTOR PROTEIN TYROSINE KINASE ACTIVITY	Molecular function	43	43	http://www.broadinstitute.org/gsea/msigdb/cards/TRANSMEMBRANE_RECEPTOR_PROTEIN_TYROSINE_KINASE_ACTIVITY	0110	0000	tumor specific responding	10
BIOCARTA MCALPAIN PATHWAY	Adhesion - Cell Signaling	25	23	http://www.broadinstitute.org/gsea/msigdb/cards/BIOCARTA_MCALPAIN_PATHWAY	0110	0000	tumor specific responding	4
BIOCARTA SPRY PATHWAY	Cell Signaling	18	18	http://www.broadinstitute.org/gsea/msigdb/cards/BIOCARTA_SPRY_PATHWAY	0110	0000	tumor specific responding	5
GO MITOCHONDRION	Cellular component	343	311	http://www.broadinstitute.org/gsea/msigdb/cards/MITOCHONDRION	0101	1111	tumor specific responding	8
GO TRANSLATION	Biological process	180	154	http://www.broadinstitute.org/gsea/msigdb/cards/TRANSLATION	0101	1111	tumor specific responding	8
GO MITOCHONDRIAL PART	Cellular component	142	137	http://www.broadinstitute.org/gsea/msigdb/cards/MITOCHONDRIAL_PART	0101	1111	tumor specific responding	3
GO PROTEINACEOUS EXTRACELLULAR MATRIX	Cellular component	98	92	http://www.broadinstitute.org/gsea/msigdb/cards/PROTEINACEOUS_EXTRACELLULAR_MATRIX	0101	1111	tumor specific responding	0
KEGG HUNTINGTONS DISEASE	Human Diseases	185	164	http://www.broadinstitute.org/gsea/msigdb/cards/KEGG_HUNTINGTONS_DISEASE	0101	1111	tumor specific responding	15
KEGG ALZHEIMERS DISEASE	Human Diseases	169	149	http://www.broadinstitute.org/gsea/msigdb/cards/KEGG_ALZHEIMERS_DISEASE	0101	1111	tumor specific responding	5
KEGG SPLICEOSOME	Genetic Information Processing	128	96	http://www.broadinstitute.org/gsea/msigdb/cards/KEGG_SPLICEOSOME	0101	1111	tumor specific responding	4
GO G PROTEIN COUPLED RECEPTOR PROTEIN SIGNALING PATHWAY	Biological process	342	308	http://www.broadinstitute.org/gsea/msigdb/cards/G_PROTEIN_COUPLED_RECEPTOR_PROTEIN_SIGNALING_PATHWAY	0101	0000	tumor specific responding	6
GO ACTIN FILAMENT BASED PROCESS	Biological process	115	108	http://www.broadinstitute.org/gsea/msigdb/cards/ACTIN_FILAMENT_BASED_PROCESS	0101	0000	tumor specific responding	8
GO CYCLIC NUCLEOTIDE MEDIATED SIGNALING	Biological process	102	100	http://www.broadinstitute.org/gsea/msigdb/cards/CYCLIC_NUCLEOTIDE_MEDIATED_SIGNALING	0101	0000	tumor specific responding	3
GO ACTIN CYTOSKELETON ORGANIZATION AND BIOGENESIS	Biological process	105	98	http://www.broadinstitute.org/gsea/msigdb/cards/ACTIN_CYTOSKELETON_ORGANIZATION_AND_BIOGENESIS	0101	0000	tumor specific responding	8
GO ELECTRON TRANSPORT GO 0006118	Biological process	51	50	http://www.broadinstitute.org/gsea/msigdb/cards/ELECTRON_TRANSPORT_GO_0006118	0101	0000	tumor specific responding	1
GO STEROID BIOSYNTHETIC PROCESS	Biological process	23	23	http://www.broadinstitute.org/gsea/msigdb/cards/STEROID_BIOSYNTHETIC_PROCESS	0101	0000	tumor specific responding	0
GO RNA DEPENDENT ATPASE ACTIVITY	Molecular function	18	15	http://www.broadinstitute.org/gsea/msigdb/cards/RNA_DEPENDENT_ATPASE_ACTIVITY	0101	0000	tumor specific responding	0
KEGG ASCORBATE AND ALDARATE METABOLISM	Metabolism	25	16	http://www.broadinstitute.org/gsea/msigdb/cards/KEGG_ASCORBATE_AND_ALDARATE_METABOLISM	0101	0000	tumor specific responding	1
BIOCARTA PTDINS PATHWAY	Cell Signaling	23	23	http://www.broadinstitute.org/gsea/msigdb/cards/BIOCARTA_PTDINS_PATHWAY	0101	0000	tumor specific responding	2
GO EXTRACELLULAR REGION PART	Cellular component	338	316	http://www.broadinstitute.org/gsea/msigdb/cards/EXTRACELLULAR_REGION_PART	0100	1111	tumor specific responding	1
GO EXTRACELLULAR MATRIX	Cellular component	100	94	http://www.broadinstitute.org/gsea/msigdb/cards/EXTRACELLULAR_MATRIX	0100	1111	tumor specific responding	0
GO EXTRACELLULAR MATRIX PART	Cellular component	57	54	http://www.broadinstitute.org/gsea/msigdb/cards/EXTRACELLULAR_MATRIX_PART	0100	1111	tumor specific responding	0
GO NUCLEAR CHROMOSOME	Cellular component	54	50	http://www.broadinstitute.org/gsea/msigdb/cards/NUCLEAR_CHROMOSOME	0100	1111	tumor specific responding	4
GO OXIDOREDUCTASE ACTIVITY ACTING ON THE ALDEHYDE OR OXO GROUP OF DONORS	Molecular function	22	22	http://www.broadinstitute.org/gsea/msigdb/cards/OXIDOREDUCTASE_ACTIVITY_ACTING_ON_THE_ALDEHYDE_OR_OXO_GROUP_OF_DONORS	0100	1111	tumor specific responding	1
KEGG PYRUVATE METABOLISM	Metabolism	40	40	http://www.broadinstitute.org/gsea/msigdb/cards/KEGG_PYRUVATE_METABOLISM	0100	1111	tumor specific responding	1
GO SUBSTRATE SPECIFIC TRANSPORTER ACTIVITY	Molecular function	392	378	http://www.broadinstitute.org/gsea/msigdb/cards/SUBSTRATE_SPECIFIC_TRANSPORTER_ACTIVITY	0100	0000	tumor specific responding	3
GO SUBSTRATE SPECIFIC TRANSMEMBRANE TRANSPORTER ACTIVITY	Molecular function	344	331	http://www.broadinstitute.org/gsea/msigdb/cards/SUBSTRATE_SPECIFIC_TRANSMEMBRANE_TRANSPORTER_ACTIVITY	0100	0000	tumor specific responding	3
GO IMMUNE RESPONSE	Biological process	235	221	http://www.broadinstitute.org/gsea/msigdb/cards/IMMUNE_RESPONSE	0100	0000	tumor specific responding	17
GO POSITIVE REGULATION OF CATALYTIC ACTIVITY	Biological process	165	146	http://www.broadinstitute.org/gsea/msigdb/cards/POSITIVE_REGULATION_OF_CATALYTIC_ACTIVITY	0100	0000	tumor specific responding	18
GO SECONDARY ACTIVE TRANSMEMBRANE TRANSPORTER ACTIVITY	Molecular function	47	47	http://www.broadinstitute.org/gsea/msigdb/cards/SECONDARY_ACTIVE_TRANSMEMBRANE_TRANSPORTER_ACTIVITY	0100	0000	tumor specific responding	0
GO ORGANIC ACID TRANSMEMBRANE TRANSPORTER ACTIVITY	Molecular function	45	45	http://www.broadinstitute.org/gsea/msigdb/cards/ORGANIC_ACID_TRANSMEMBRANE_TRANSPORTER_ACTIVITY	0100	0000	tumor specific responding	0
GO CARBOXYLIC ACID TRANSMEMBRANE TRANSPORTER ACTIVITY	Molecular function	44	44	http://www.broadinstitute.org/gsea/msigdb/cards/CARBOXYLIC_ACID_TRANSMEMBRANE_TRANSPORTER_ACTIVITY	0100	0000	tumor specific responding	0
GO PRIMARY ACTIVE TRANSMEMBRANE TRANSPORTER ACTIVITY	Molecular function	40	38	http://www.broadinstitute.org/gsea/msigdb/cards/PRIMARY_ACTIVE_TRANSMEMBRANE_TRANSPORTER_ACTIVITY	0100	0000	tumor specific responding	0
GO PEPTIDYL TYROSINE PHOSPHORYLATION	Biological process	27	26	http://www.broadinstitute.org/gsea/msigdb/cards/PEPTIDYL_TYROSINE_PHOSPHORYLATION	0100	0000	tumor specific responding	5
GO ENDOSOME TRANSPORT	Biological process	23	23	http://www.broadinstitute.org/gsea/msigdb/cards/ENDOSOME_TRANSPORT	0100	0000	tumor specific responding	1
GO ACTIVATION OF PROTEIN KINASE ACTIVITY	Biological process	28	23	http://www.broadinstitute.org/gsea/msigdb/cards/ACTIVATION_OF_PROTEIN_KINASE_ACTIVITY	0100	0000	tumor specific responding	2
GO ACTIN FILAMENT ORGANIZATION	Biological process	24	22	http://www.broadinstitute.org/gsea/msigdb/cards/ACTIN_FILAMENT_ORGANIZATION	0100	0000	tumor specific responding	3
GO CYTOKINE AND CHEMOKINE MEDIATED SIGNALING PATHWAY	Biological process	23	22	http://www.broadinstitute.org/gsea/msigdb/cards/CYTOKINE_AND_CHEMOKINE_MEDIATED_SIGNALING_PATHWAY	0100	0000	tumor specific responding	1
GO BASAL LAMINA	Cellular component	21	18	http://www.broadinstitute.org/gsea/msigdb/cards/BASAL_LAMINA	0100	0000	tumor specific responding	0
GO PROTEOGLYCAN METABOLIC PROCESS	Biological process	21	18	http://www.broadinstitute.org/gsea/msigdb/cards/PROTEOGLYCAN_METABOLIC_PROCESS	0100	0000	tumor specific responding	1
GO TRANS GOLGI NETWORK	Cellular component	21	17	http://www.broadinstitute.org/gsea/msigdb/cards/TRANS_GOLGI_NETWORK	0100	0000	tumor specific responding	1
KEGG CALCIUM SIGNALING PATHWAY	Environmental Information Processing	178	171	http://www.broadinstitute.org/gsea/msigdb/cards/KEGG_CALCIUM_SIGNALING_PATHWAY	0100	0000	tumor specific responding	7
KEGG LEUKOCYTE TRANSENDOTHELIAL MIGRATION	Organismal Systems	118	107	http://www.broadinstitute.org/gsea/msigdb/cards/KEGG_LEUKOCYTE_TRANSENDOTHELIAL_MIGRATION	0100	0000	tumor specific responding	9
KEGG GAP JUNCTION	Cellular Processes	90	75	http://www.broadinstitute.org/gsea/msigdb/cards/KEGG_GAP_JUNCTION	0100	0000	tumor specific responding	13
KEGG GLYCEROPHOSPHOLIPID METABOLISM	Metabolism	77	64	http://www.broadinstitute.org/gsea/msigdb/cards/KEGG_GLYCEROPHOSPHOLIPID_METABOLISM	0100	0000	tumor specific responding	0
KEGG INTESTINAL IMMUNE NETWORK FOR IGA PRODUCTION	Organismal Systems	48	45	http://www.broadinstitute.org/gsea/msigdb/cards/KEGG_INTESTINAL_IMMUNE_NETWORK_FOR_IGA_PRODUCTION	0100	0000	tumor specific responding	2
KEGG BASAL TRANSCRIPTION FACTORS	Genetic Information Processing	36	33	http://www.broadinstitute.org/gsea/msigdb/cards/KEGG_BASAL_TRANSCRIPTION_FACTORS	0100	0000	tumor specific responding	0
KEGG SPHINGOLIPID METABOLISM	Metabolism	40	30	http://www.broadinstitute.org/gsea/msigdb/cards/KEGG_SPHINGOLIPID_METABOLISM	0100	0000	tumor specific responding	0
KEGG GLYCOSAMINOGLYCAN BIOSYNTHESIS HEPARAN SULFATE	Metabolism	26	25	http://www.broadinstitute.org/gsea/msigdb/cards/KEGG_GLYCOSAMINOGLYCAN_BIOSYNTHESIS_HEPARAN_SULFATE	0100	0000	tumor specific responding	2
BIOCARTA MITOCHONDRIA PATHWAY	Apoptosis	21	18	http://www.broadinstitute.org/gsea/msigdb/cards/BIOCARTA_MITOCHONDRIA_PATHWAY	0100	0000	tumor specific responding	2
BIOCARTA RELA PATHWAY	Cell Signaling-Expression	16	16	http://www.broadinstitute.org/gsea/msigdb/cards/BIOCARTA_RELA_PATHWAY	0100	0000	tumor specific responding	2
GO CELLULAR LOCALIZATION	Biological process	371	334	http://www.broadinstitute.org/gsea/msigdb/cards/CELLULAR_LOCALIZATION	0011	0000	tumor specific responding	22
GO ESTABLISHMENT OF CELLULAR LOCALIZATION	Biological process	353	317	http://www.broadinstitute.org/gsea/msigdb/cards/ESTABLISHMENT_OF_CELLULAR_LOCALIZATION	0011	0000	tumor specific responding	19
GO SMALL GTPASE MEDIATED SIGNAL TRANSDUCTION	Biological process	89	82	http://www.broadinstitute.org/gsea/msigdb/cards/SMALL_GTPASE_MEDIATED_SIGNAL_TRANSDUCTION	0011	0000	tumor specific responding	5
GO GROWTH FACTOR ACTIVITY	Molecular function	55	49	http://www.broadinstitute.org/gsea/msigdb/cards/GROWTH_FACTOR_ACTIVITY	0011	0000	tumor specific responding	1
GO ADAPTIVE IMMUNE RESPONSE GO 0002460	Biological process	24	23	http://www.broadinstitute.org/gsea/msigdb/cards/ADAPTIVE_IMMUNE_RESPONSE_GO_0002460	0011	0000	tumor specific responding	2
GO ANTIOXIDANT ACTIVITY	Molecular function	18	17	http://www.broadinstitute.org/gsea/msigdb/cards/ANTIOXIDANT_ACTIVITY	0011	0000	tumor specific responding	0
KEGG ADHERENS JUNCTION	Cellular Processes	75	73	http://www.broadinstitute.org/gsea/msigdb/cards/KEGG_ADHERENS_JUNCTION	0011	0000	tumor specific responding	12
KEGG AUTOIMMUNE THYROID DISEASE	Human Diseases	53	49	http://www.broadinstitute.org/gsea/msigdb/cards/KEGG_AUTOIMMUNE_THYROID_DISEASE	0011	0000	tumor specific responding	3
KEGG LINOLEIC ACID METABOLISM	Metabolism	29	27	http://www.broadinstitute.org/gsea/msigdb/cards/KEGG_LINOLEIC_ACID_METABOLISM	0011	0000	tumor specific responding	0
BIOCARTA BIOPEPTIDES PATHWAY	Cell Signaling	45	41	http://www.broadinstitute.org/gsea/msigdb/cards/BIOCARTA_BIOPEPTIDES_PATHWAY	0011	0000	tumor specific responding	7
BIOCARTA P38MAPK PATHWAY	Cell Signaling	40	39	http://www.broadinstitute.org/gsea/msigdb/cards/BIOCARTA_P38MAPK_PATHWAY	0011	0000	tumor specific responding	8
BIOCARTA MET PATHWAY	Cell Signaling	37	36	http://www.broadinstitute.org/gsea/msigdb/cards/BIOCARTA_MET_PATHWAY	0011	0000	tumor specific responding	11
BIOCARTA EGF PATHWAY	Cell Signaling	31	30	http://www.broadinstitute.org/gsea/msigdb/cards/BIOCARTA_EGF_PATHWAY	0011	0000	tumor specific responding	10
BIOCARTA ERK PATHWAY	Adhesion - Cell Signaling	28	27	http://www.broadinstitute.org/gsea/msigdb/cards/BIOCARTA_ERK_PATHWAY	0011	0000	tumor specific responding	9
BIOCARTA CXCR4 PATHWAY	Cell Signaling – Cytokines/Chemokines – Immunology	24	23	http://www.broadinstitute.org/gsea/msigdb/cards/BIOCARTA_CXCR4_PATHWAY	0011	0000	tumor specific responding	6
BIOCARTA EIF4 PATHWAY	Cell Signaling – Expression	24	22	http://www.broadinstitute.org/gsea/msigdb/cards/BIOCARTA_EIF4_PATHWAY	0011	0000	tumor specific responding	5
BIOCARTA ERK5 PATHWAY	Cell Signaling-Neuroscience	18	17	http://www.broadinstitute.org/gsea/msigdb/cards/BIOCARTA_ERK5_PATHWAY	0011	0000	tumor specific responding	6
GO REGULATION OF TRANSCRIPTION FROM RNA POLYMERASE II PROMOTER	Biological process	289	259	http://www.broadinstitute.org/gsea/msigdb/cards/REGULATION_OF_TRANSCRIPTION_FROM_RNA_POLYMERASE_II_PROMOTER	0010	0000	tumor specific responding	33
GO PROTEIN LOCALIZATION	Biological process	214	189	http://www.broadinstitute.org/gsea/msigdb/cards/PROTEIN_LOCALIZATION	0010	0000	tumor specific responding	14
GO PROTEIN TRANSPORT	Biological process	157	141	http://www.broadinstitute.org/gsea/msigdb/cards/PROTEIN_TRANSPORT	0010	0000	tumor specific responding	11
GO INTRACELLULAR PROTEIN TRANSPORT	Biological process	145	129	http://www.broadinstitute.org/gsea/msigdb/cards/INTRACELLULAR_PROTEIN_TRANSPORT	0010	0000	tumor specific responding	10
GO ENDOPEPTIDASE ACTIVITY	Molecular function	117	107	http://www.broadinstitute.org/gsea/msigdb/cards/ENDOPEPTIDASE_ACTIVITY	0010	0000	tumor specific responding	2
GO PROTEIN TARGETING	Biological process	109	98	http://www.broadinstitute.org/gsea/msigdb/cards/PROTEIN_TARGETING	0010	0000	tumor specific responding	8
GO CELLULAR MACROMOLECULE CATABOLIC PROCESS	Biological process	104	97	http://www.broadinstitute.org/gsea/msigdb/cards/CELLULAR_MACROMOLECULE_CATABOLIC_PROCESS	0010	0000	tumor specific responding	0
GO CELL CELL ADHESION	Biological process	86	79	http://www.broadinstitute.org/gsea/msigdb/cards/CELL_CELL_ADHESION	0010	0000	tumor specific responding	6
GO PROTEIN C TERMINUS BINDING	Molecular function	73	71	http://www.broadinstitute.org/gsea/msigdb/cards/PROTEIN_C_TERMINUS_BINDING	0010	0000	tumor specific responding	11
GO NUCLEAR ENVELOPE	Cellular component	73	67	http://www.broadinstitute.org/gsea/msigdb/cards/NUCLEAR_ENVELOPE	0010	0000	tumor specific responding	6
GO PROTEIN DOMAIN SPECIFIC BINDING	Molecular function	72	63	http://www.broadinstitute.org/gsea/msigdb/cards/PROTEIN_DOMAIN_SPECIFIC_BINDING	0010	0000	tumor specific responding	7
GO CYSTEINE TYPE PEPTIDASE ACTIVITY	Molecular function	54	52	http://www.broadinstitute.org/gsea/msigdb/cards/CYSTEINE_TYPE_PEPTIDASE_ACTIVITY	0010	0000	tumor specific responding	1
GO NUCLEAR MEMBRANE	Cellular component	50	47	http://www.broadinstitute.org/gsea/msigdb/cards/NUCLEAR_MEMBRANE	0010	0000	tumor specific responding	5
GO SMALL CONJUGATING PROTEIN LIGASE ACTIVITY	Molecular function	51	45	http://www.broadinstitute.org/gsea/msigdb/cards/SMALL_CONJUGATING_PROTEIN_LIGASE_ACTIVITY	0010	0000	tumor specific responding	6
GO NUCLEAR IMPORT	Biological process	50	43	http://www.broadinstitute.org/gsea/msigdb/cards/NUCLEAR_IMPORT	0010	0000	tumor specific responding	7
GO UBIQUITIN PROTEIN LIGASE ACTIVITY	Molecular function	49	43	http://www.broadinstitute.org/gsea/msigdb/cards/UBIQUITIN_PROTEIN_LIGASE_ACTIVITY	0010	0000	tumor specific responding	6
GO POSITIVE REGULATION OF RESPONSE TO STIMULUS	Biological process	41	40	http://www.broadinstitute.org/gsea/msigdb/cards/POSITIVE_REGULATION_OF_RESPONSE_TO_STIMULUS	0010	0000	tumor specific responding	2
GO NUCLEAR MEMBRANE PART	Cellular component	42	39	http://www.broadinstitute.org/gsea/msigdb/cards/NUCLEAR_MEMBRANE_PART	0010	0000	tumor specific responding	3
GO CYSTEINE TYPE ENDOPEPTIDASE ACTIVITY	Molecular function	40	38	http://www.broadinstitute.org/gsea/msigdb/cards/CYSTEINE_TYPE_ENDOPEPTIDASE_ACTIVITY	0010	0000	tumor specific responding	1
GO LEUKOCYTE DIFFERENTIATION	Biological process	38	37	http://www.broadinstitute.org/gsea/msigdb/cards/LEUKOCYTE_DIFFERENTIATION	0010	0000	tumor specific responding	5
GO PORE COMPLEX	Cellular component	36	32	http://www.broadinstitute.org/gsea/msigdb/cards/PORE_COMPLEX	0010	0000	tumor specific responding	3
GO NEGATIVE REGULATION OF SIGNAL TRANSDUCTION	Biological process	37	32	http://www.broadinstitute.org/gsea/msigdb/cards/NEGATIVE_REGULATION_OF_SIGNAL_TRANSDUCTION	0010	0000	tumor specific responding	7
GO NUCLEAR PORE	Cellular component	31	28	http://www.broadinstitute.org/gsea/msigdb/cards/NUCLEAR_PORE	0010	0000	tumor specific responding	3
GO TRANSLATIONAL INITIATION	Biological process	39	26	http://www.broadinstitute.org/gsea/msigdb/cards/TRANSLATIONAL_INITIATION	0010	0000	tumor specific responding	1
GO METALLOENDOPEPTIDASE ACTIVITY	Molecular function	27	26	http://www.broadinstitute.org/gsea/msigdb/cards/METALLOENDOPEPTIDASE_ACTIVITY	0010	0000	tumor specific responding	0
GO CARBOHYDRATE CATABOLIC PROCESS	Biological process	24	23	http://www.broadinstitute.org/gsea/msigdb/cards/CARBOHYDRATE_CATABOLIC_PROCESS	0010	0000	tumor specific responding	0
GO CELLULAR CARBOHYDRATE CATABOLIC PROCESS	Biological process	23	22	http://www.broadinstitute.org/gsea/msigdb/cards/CELLULAR_CARBOHYDRATE_CATABOLIC_PROCESS	0010	0000	tumor specific responding	0
GO REGULATION OF SMALL GTPASE MEDIATED SIGNAL TRANSDUCTION	Biological process	23	21	http://www.broadinstitute.org/gsea/msigdb/cards/REGULATION_OF_SMALL_GTPASE_MEDIATED_SIGNAL_TRANSDUCTION	0010	0000	tumor specific responding	4
GO VIRAL GENOME REPLICATION	Biological process	21	20	http://www.broadinstitute.org/gsea/msigdb/cards/VIRAL_GENOME_REPLICATION	0010	0000	tumor specific responding	2
GO COVALENT CHROMATIN MODIFICATION	Biological process	25	20	http://www.broadinstitute.org/gsea/msigdb/cards/COVALENT_CHROMATIN_MODIFICATION	0010	0000	tumor specific responding	4
GO REGULATION OF MAPKKK CASCADE	Biological process	20	19	http://www.broadinstitute.org/gsea/msigdb/cards/REGULATION_OF_MAPKKK_CASCADE	0010	0000	tumor specific responding	2
GO B CELL ACTIVATION	Biological process	20	19	http://www.broadinstitute.org/gsea/msigdb/cards/B_CELL_ACTIVATION	0010	0000	tumor specific responding	1
GO EARLY ENDOSOME	Cellular component	18	17	http://www.broadinstitute.org/gsea/msigdb/cards/EARLY_ENDOSOME	0010	0000	tumor specific responding	1
GO REGULATION OF RAS PROTEIN SIGNAL TRANSDUCTION	Biological process	19	17	http://www.broadinstitute.org/gsea/msigdb/cards/REGULATION_OF_RAS_PROTEIN_SIGNAL_TRANSDUCTION	0010	0000	tumor specific responding	4
GO ACTIVATION OF IMMUNE RESPONSE	Biological process	17	17	http://www.broadinstitute.org/gsea/msigdb/cards/ACTIVATION_OF_IMMUNE_RESPONSE	0010	0000	tumor specific responding	2
GO GLYCOLIPID METABOLIC PROCESS	Biological process	16	16	http://www.broadinstitute.org/gsea/msigdb/cards/GLYCOLIPID_METABOLIC_PROCESS	0010	0000	tumor specific responding	0
GO RESPONSE TO NUTRIENT	Biological process	17	16	http://www.broadinstitute.org/gsea/msigdb/cards/RESPONSE_TO_NUTRIENT	0010	0000	tumor specific responding	1
GO GALACTOSYLTRANSFERASE ACTIVITY	Molecular function	16	16	http://www.broadinstitute.org/gsea/msigdb/cards/GALACTOSYLTRANSFERASE_ACTIVITY	0010	0000	tumor specific responding	0
GO TUBE MORPHOGENESIS	Biological process	15	15	http://www.broadinstitute.org/gsea/msigdb/cards/TUBE_MORPHOGENESIS	0010	0000	tumor specific responding	1
GO PEROXISOME ORGANIZATION AND BIOGENESIS	Biological process	16	15	http://www.broadinstitute.org/gsea/msigdb/cards/PEROXISOME_ORGANIZATION_AND_BIOGENESIS	0010	0000	tumor specific responding	0
GO MYELOID LEUKOCYTE DIFFERENTIATION	Biological process	15	15	http://www.broadinstitute.org/gsea/msigdb/cards/MYELOID_LEUKOCYTE_DIFFERENTIATION	0010	0000	tumor specific responding	2
KEGG NATURAL KILLER CELL MEDIATED CYTOTOXICITY	Organismal Systems	137	129	http://www.broadinstitute.org/gsea/msigdb/cards/KEGG_NATURAL_KILLER_CELL_MEDIATED_CYTOTOXICITY	0010	0000	tumor specific responding	14
KEGG MTOR SIGNALING PATHWAY	Environmental Information Processing	52	46	http://www.broadinstitute.org/gsea/msigdb/cards/KEGG_MTOR_SIGNALING_PATHWAY	0010	0000	tumor specific responding	8
KEGG TYPE I DIABETES MELLITUS	Human Diseases	44	40	http://www.broadinstitute.org/gsea/msigdb/cards/KEGG_TYPE_I_DIABETES_MELLITUS	0010	0000	tumor specific responding	2
KEGG AMINOACYL TRNA BIOSYNTHESIS	Genetic Information Processing	41	32	http://www.broadinstitute.org/gsea/msigdb/cards/KEGG_AMINOACYL_TRNA_BIOSYNTHESIS	0010	0000	tumor specific responding	1
KEGG ASTHMA	Human Diseases	30	27	http://www.broadinstitute.org/gsea/msigdb/cards/KEGG_ASTHMA	0010	0000	tumor specific responding	0
BIOCARTA HDAC PATHWAY	Cell Signaling-Developmental Biology	32	28	http://www.broadinstitute.org/gsea/msigdb/cards/BIOCARTA_HDAC_PATHWAY	0010	0000	tumor specific responding	3
BIOCARTA GH PATHWAY	Cell Signaling	28	26	http://www.broadinstitute.org/gsea/msigdb/cards/BIOCARTA_GH_PATHWAY	0010	0000	tumor specific responding	7
BIOCARTA ECM PATHWAY	Adhesion - Cell Signaling	24	23	http://www.broadinstitute.org/gsea/msigdb/cards/BIOCARTA_ECM_PATHWAY	0010	0000	tumor specific responding	5
BIOCARTA GLEEVEC PATHWAY	Adhesion - Cell Signaling	23	23	http://www.broadinstitute.org/gsea/msigdb/cards/BIOCARTA_GLEEVEC_PATHWAY	0010	0000	tumor specific responding	11
BIOCARTA IGF1R PATHWAY	Apoptosis - Cell Signaling	23	23	http://www.broadinstitute.org/gsea/msigdb/cards/BIOCARTA_IGF1R_PATHWAY	0010	0000	tumor specific responding	7
BIOCARTA TPO PATHWAY	Cell Signaling – Cytokines/Chemokines	24	23	http://www.broadinstitute.org/gsea/msigdb/cards/BIOCARTA_TPO_PATHWAY	0010	0000	tumor specific responding	9
BIOCARTA IL2 PATHWAY	Cell Signaling – Cytokines/Chemokines – Immunology	22	22	http://www.broadinstitute.org/gsea/msigdb/cards/BIOCARTA_IL2_PATHWAY	0010	0000	tumor specific responding	9
BIOCARTA INSULIN PATHWAY	Cell Signaling – Cytokines/Chemokines	22	22	http://www.broadinstitute.org/gsea/msigdb/cards/BIOCARTA_INSULIN_PATHWAY	0010	0000	tumor specific responding	7
BIOCARTA TFF PATHWAY	Adhesion - Apoptosis - Cell Signaling	21	21	http://www.broadinstitute.org/gsea/msigdb/cards/BIOCARTA_TFF_PATHWAY	0010	0000	tumor specific responding	6
BIOCARTA NGF PATHWAY	Cell Activation-Cell Signaling-Cytokines/Chemokines-Neuroscience	18	17	http://www.broadinstitute.org/gsea/msigdb/cards/BIOCARTA_NGF_PATHWAY	0010	0000	tumor specific responding	6
BIOCARTA PTEN PATHWAY	Apoptosis-Cell Cycle Regulation-Cell Signaling	18	17	http://www.broadinstitute.org/gsea/msigdb/cards/BIOCARTA_PTEN_PATHWAY	0010	0000	tumor specific responding	4
BIOCARTA IL3 PATHWAY	Cell Signaling-Cytokines/Chemokines-Immunology	15	15	http://www.broadinstitute.org/gsea/msigdb/cards/BIOCARTA_IL3_PATHWAY	0010	0000	tumor specific responding	4
GO STRUCTURAL MOLECULE ACTIVITY	Molecular function	244	226	http://www.broadinstitute.org/gsea/msigdb/cards/STRUCTURAL_MOLECULE_ACTIVITY	0001	1111	tumor specific responding	8
GO ENVELOPE	Cellular component	169	158	http://www.broadinstitute.org/gsea/msigdb/cards/ENVELOPE	0001	1111	tumor specific responding	8
GO ORGANELLE ENVELOPE	Cellular component	169	158	http://www.broadinstitute.org/gsea/msigdb/cards/ORGANELLE_ENVELOPE	0001	1111	tumor specific responding	8
GO MITOCHONDRIAL ENVELOPE	Cellular component	97	92	http://www.broadinstitute.org/gsea/msigdb/cards/MITOCHONDRIAL_ENVELOPE	0001	1111	tumor specific responding	3
GO MITOCHONDRIAL MEMBRANE	Cellular component	86	82	http://www.broadinstitute.org/gsea/msigdb/cards/MITOCHONDRIAL_MEMBRANE	0001	1111	tumor specific responding	3
GO ORGANELLE INNER MEMBRANE	Cellular component	75	72	http://www.broadinstitute.org/gsea/msigdb/cards/ORGANELLE_INNER_MEMBRANE	0001	1111	tumor specific responding	1
GO MITOCHONDRIAL INNER MEMBRANE	Cellular component	67	64	http://www.broadinstitute.org/gsea/msigdb/cards/MITOCHONDRIAL_INNER_MEMBRANE	0001	1111	tumor specific responding	1
GO MITOCHONDRIAL MEMBRANE PART	Cellular component	53	51	http://www.broadinstitute.org/gsea/msigdb/cards/MITOCHONDRIAL_MEMBRANE_PART	0001	1111	tumor specific responding	0
GO MITOCHONDRIAL RESPIRATORY CHAIN	Cellular component	24	23	http://www.broadinstitute.org/gsea/msigdb/cards/MITOCHONDRIAL_RESPIRATORY_CHAIN	0001	1111	tumor specific responding	0
GO SMALL NUCLEAR RIBONUCLEOPROTEIN COMPLEX	Cellular component	22	19	http://www.broadinstitute.org/gsea/msigdb/cards/SMALL_NUCLEAR_RIBONUCLEOPROTEIN_COMPLEX	0001	1111	tumor specific responding	0
KEGG PURINE METABOLISM	Metabolism	159	149	http://www.broadinstitute.org/gsea/msigdb/cards/KEGG_PURINE_METABOLISM	0001	1111	tumor specific responding	5
KEGG PYRIMIDINE METABOLISM	Metabolism	98	88	http://www.broadinstitute.org/gsea/msigdb/cards/KEGG_PYRIMIDINE_METABOLISM	0001	1111	tumor specific responding	2
GO ENZYME REGULATOR ACTIVITY	Molecular function	323	303	http://www.broadinstitute.org/gsea/msigdb/cards/ENZYME_REGULATOR_ACTIVITY	0001	0000	tumor specific responding	18
GO DEFENSE RESPONSE	Biological process	270	242	http://www.broadinstitute.org/gsea/msigdb/cards/DEFENSE_RESPONSE	0001	0000	tumor specific responding	7
GO REPRODUCTION	Biological process	265	235	http://www.broadinstitute.org/gsea/msigdb/cards/REPRODUCTION	0001	0000	tumor specific responding	6
GO SUBSTRATE SPECIFIC CHANNEL ACTIVITY	Molecular function	156	147	http://www.broadinstitute.org/gsea/msigdb/cards/SUBSTRATE_SPECIFIC_CHANNEL_ACTIVITY	0001	0000	tumor specific responding	1
GO MULTI ORGANISM PROCESS	Biological process	165	146	http://www.broadinstitute.org/gsea/msigdb/cards/MULTI_ORGANISM_PROCESS	0001	0000	tumor specific responding	4
GO REPRODUCTIVE PROCESS	Biological process	162	146	http://www.broadinstitute.org/gsea/msigdb/cards/REPRODUCTIVE_PROCESS	0001	0000	tumor specific responding	4
GO SECOND MESSENGER MEDIATED SIGNALING	Biological process	153	145	http://www.broadinstitute.org/gsea/msigdb/cards/SECOND_MESSENGER_MEDIATED_SIGNALING	0001	0000	tumor specific responding	5
GO REGULATION OF MULTICELLULAR ORGANISMAL PROCESS	Biological process	151	143	http://www.broadinstitute.org/gsea/msigdb/cards/REGULATION_OF_MULTICELLULAR_ORGANISMAL_PROCESS	0001	0000	tumor specific responding	5
GO BEHAVIOR	Biological process	153	140	http://www.broadinstitute.org/gsea/msigdb/cards/BEHAVIOR	0001	0000	tumor specific responding	4
GO ION CHANNEL ACTIVITY	Molecular function	149	140	http://www.broadinstitute.org/gsea/msigdb/cards/ION_CHANNEL_ACTIVITY	0001	0000	tumor specific responding	1
GO SEXUAL REPRODUCTION	Biological process	139	121	http://www.broadinstitute.org/gsea/msigdb/cards/SEXUAL_REPRODUCTION	0001	0000	tumor specific responding	2
GO INFLAMMATORY RESPONSE	Biological process	129	115	http://www.broadinstitute.org/gsea/msigdb/cards/INFLAMMATORY_RESPONSE	0001	0000	tumor specific responding	1
GO GATED CHANNEL ACTIVITY	Molecular function	122	115	http://www.broadinstitute.org/gsea/msigdb/cards/GATED_CHANNEL_ACTIVITY	0001	0000	tumor specific responding	1
GO I KAPPAB KINASE NF KAPPAB CASCADE	Biological process	114	104	http://www.broadinstitute.org/gsea/msigdb/cards/I_KAPPAB_KINASE_NF_KAPPAB_CASCADE	0001	0000	tumor specific responding	8
GO POSITIVE REGULATION OF RNA METABOLIC PROCESS	Biological process	120	101	http://www.broadinstitute.org/gsea/msigdb/cards/POSITIVE_REGULATION_OF_RNA_METABOLIC_PROCESS	0001	0000	tumor specific responding	14
GO POSITIVE REGULATION OF TRANSCRIPTIONDNA DEPENDENT	Biological process	118	99	http://www.broadinstitute.org/gsea/msigdb/cards/POSITIVE_REGULATION_OF_TRANSCRIPTIONDNA_DEPENDENT	0001	0000	tumor specific responding	14
GO G PROTEIN SIGNALING COUPLED TO CYCLIC NUCLEOTIDE SECOND MESSENGER	Biological process	100	98	http://www.broadinstitute.org/gsea/msigdb/cards/G_PROTEIN_SIGNALING_COUPLED_TO_CYCLIC_NUCLEOTIDE_SECOND_MESSENGER	0001	0000	tumor specific responding	3
GO REGULATION OF I KAPPAB KINASE NF KAPPAB CASCADE	Biological process	93	84	http://www.broadinstitute.org/gsea/msigdb/cards/REGULATION_OF_I_KAPPAB_KINASE_NF_KAPPAB_CASCADE	0001	0000	tumor specific responding	7
GO RESPONSE TO OTHER ORGANISM	Biological process	83	75	http://www.broadinstitute.org/gsea/msigdb/cards/RESPONSE_TO_OTHER_ORGANISM	0001	0000	tumor specific responding	3
GO CAMP MEDIATED SIGNALING	Biological process	65	65	http://www.broadinstitute.org/gsea/msigdb/cards/CAMP_MEDIATED_SIGNALING	0001	0000	tumor specific responding	2
GO G PROTEIN SIGNALING COUPLED TO CAMP NUCLEOTIDE SECOND MESSENGER	Biological process	64	64	http://www.broadinstitute.org/gsea/msigdb/cards/G_PROTEIN_SIGNALING_COUPLED_TO_CAMP_NUCLEOTIDE_SECOND_MESSENGER	0001	0000	tumor specific responding	2
GO POSITIVE REGULATION OF MULTICELLULAR ORGANISMAL PROCESS	Biological process	66	63	http://www.broadinstitute.org/gsea/msigdb/cards/POSITIVE_REGULATION_OF_MULTICELLULAR_ORGANISMAL_PROCESS	0001	0000	tumor specific responding	4
GO LIGASE ACTIVITY FORMING CARBON NITROGEN BONDS	Molecular function	68	62	http://www.broadinstitute.org/gsea/msigdb/cards/LIGASE_ACTIVITY_FORMING_CARBON_NITROGEN_BONDS	0001	0000	tumor specific responding	7
GO SMALL GTPASE REGULATOR ACTIVITY	Molecular function	67	57	http://www.broadinstitute.org/gsea/msigdb/cards/SMALL_GTPASE_REGULATOR_ACTIVITY	0001	0000	tumor specific responding	3
GO NEUROTRANSMITTER BINDING	Molecular function	53	52	http://www.broadinstitute.org/gsea/msigdb/cards/NEUROTRANSMITTER_BINDING	0001	0000	tumor specific responding	0
GO PERINUCLEAR REGION OF CYTOPLASM	Cellular component	54	50	http://www.broadinstitute.org/gsea/msigdb/cards/PERINUCLEAR_REGION_OF_CYTOPLASM	0001	0000	tumor specific responding	5
GO NEUROTRANSMITTER RECEPTOR ACTIVITY	Molecular function	50	49	http://www.broadinstitute.org/gsea/msigdb/cards/NEUROTRANSMITTER_RECEPTOR_ACTIVITY	0001	0000	tumor specific responding	0
GO LIPASE ACTIVITY	Molecular function	50	47	http://www.broadinstitute.org/gsea/msigdb/cards/LIPASE_ACTIVITY	0001	0000	tumor specific responding	0
GO MICROTUBULE ASSOCIATED COMPLEX	Cellular component	47	44	http://www.broadinstitute.org/gsea/msigdb/cards/MICROTUBULE_ASSOCIATED_COMPLEX	0001	0000	tumor specific responding	1
GO DETECTION OF STIMULUS	Biological process	47	40	http://www.broadinstitute.org/gsea/msigdb/cards/DETECTION_OF_STIMULUS	0001	0000	tumor specific responding	0
GO CYTOKINE METABOLIC PROCESS	Biological process	42	39	http://www.broadinstitute.org/gsea/msigdb/cards/CYTOKINE_METABOLIC_PROCESS	0001	0000	tumor specific responding	3
GO PROTEIN DNA COMPLEX ASSEMBLY	Biological process	49	37	http://www.broadinstitute.org/gsea/msigdb/cards/PROTEIN_DNA_COMPLEX_ASSEMBLY	0001	0000	tumor specific responding	4
GO IMMUNE EFFECTOR PROCESS	Biological process	38	37	http://www.broadinstitute.org/gsea/msigdb/cards/IMMUNE_EFFECTOR_PROCESS	0001	0000	tumor specific responding	3
GO NEGATIVE REGULATION OF GROWTH	Biological process	40	36	http://www.broadinstitute.org/gsea/msigdb/cards/NEGATIVE_REGULATION_OF_GROWTH	0001	0000	tumor specific responding	6
GO LIGAND GATED CHANNEL ACTIVITY	Molecular function	40	36	http://www.broadinstitute.org/gsea/msigdb/cards/LIGAND_GATED_CHANNEL_ACTIVITY	0001	0000	tumor specific responding	0
GO AMINE RECEPTOR ACTIVITY	Molecular function	34	34	http://www.broadinstitute.org/gsea/msigdb/cards/AMINE_RECEPTOR_ACTIVITY	0001	0000	tumor specific responding	0
GO POSITIVE REGULATION OF TRANSLATION	Biological process	35	33	http://www.broadinstitute.org/gsea/msigdb/cards/POSITIVE_REGULATION_OF_TRANSLATION	0001	0000	tumor specific responding	3
GO REGULATION OF IMMUNE RESPONSE	Biological process	33	32	http://www.broadinstitute.org/gsea/msigdb/cards/REGULATION_OF_IMMUNE_RESPONSE	0001	0000	tumor specific responding	2
GO DI TRI VALENT INORGANIC CATION TRANSPORT	Biological process	32	30	http://www.broadinstitute.org/gsea/msigdb/cards/DI___TRI_VALENT_INORGANIC_CATION_TRANSPORT	0001	0000	tumor specific responding	0
GO NEGATIVE REGULATION OF MULTICELLULAR ORGANISMAL PROCESS	Biological process	32	29	http://www.broadinstitute.org/gsea/msigdb/cards/NEGATIVE_REGULATION_OF_MULTICELLULAR_ORGANISMAL_PROCESS	0001	0000	tumor specific responding	0
GO POSITIVE REGULATION OF IMMUNE RESPONSE	Biological process	29	28	http://www.broadinstitute.org/gsea/msigdb/cards/POSITIVE_REGULATION_OF_IMMUNE_RESPONSE	0001	0000	tumor specific responding	2
GO REGULATION OF CYTOSKELETON ORGANIZATION AND BIOGENESIS	Biological process	30	28	http://www.broadinstitute.org/gsea/msigdb/cards/REGULATION_OF_CYTOSKELETON_ORGANIZATION_AND_BIOGENESIS	0001	0000	tumor specific responding	3
GO HEMATOPOIETIN INTERFERON CLASSD200 DOMAIN CYTOKINE RECEPTOR BINDING	Molecular function	29	28	http://www.broadinstitute.org/gsea/msigdb/cards/HEMATOPOIETIN_INTERFERON_CLASSD200_DOMAIN_CYTOKINE_RECEPTOR_BINDING	0001	0000	tumor specific responding	1
GO MONOOXYGENASE ACTIVITY	Molecular function	31	28	http://www.broadinstitute.org/gsea/msigdb/cards/MONOOXYGENASE_ACTIVITY	0001	0000	tumor specific responding	0
GO TRANSPORT VESICLE	Cellular component	33	26	http://www.broadinstitute.org/gsea/msigdb/cards/TRANSPORT_VESICLE	0001	0000	tumor specific responding	1
GO RESPONSE TO BACTERIUM	Biological process	31	26	http://www.broadinstitute.org/gsea/msigdb/cards/RESPONSE_TO_BACTERIUM	0001	0000	tumor specific responding	1
GO DEVELOPMENT OF PRIMARY SEXUAL CHARACTERISTICS	Biological process	26	26	http://www.broadinstitute.org/gsea/msigdb/cards/DEVELOPMENT_OF_PRIMARY_SEXUAL_CHARACTERISTICS	0001	0000	tumor specific responding	2
GO CYTOSKELETON DEPENDENT INTRACELLULAR TRANSPORT	Biological process	26	26	http://www.broadinstitute.org/gsea/msigdb/cards/CYTOSKELETON_DEPENDENT_INTRACELLULAR_TRANSPORT	0001	0000	tumor specific responding	2
GO CALCIUM ION TRANSPORT	Biological process	27	25	http://www.broadinstitute.org/gsea/msigdb/cards/CALCIUM_ION_TRANSPORT	0001	0000	tumor specific responding	0
GO RHYTHMIC PROCESS	Biological process	29	24	http://www.broadinstitute.org/gsea/msigdb/cards/RHYTHMIC_PROCESS	0001	0000	tumor specific responding	2
GO ADAPTIVE IMMUNE RESPONSE	Biological process	25	24	http://www.broadinstitute.org/gsea/msigdb/cards/ADAPTIVE_IMMUNE_RESPONSE	0001	0000	tumor specific responding	3
GO INTERLEUKIN BINDING	Molecular function	25	24	http://www.broadinstitute.org/gsea/msigdb/cards/INTERLEUKIN_BINDING	0001	0000	tumor specific responding	2
GO FEEDING BEHAVIOR	Biological process	24	23	http://www.broadinstitute.org/gsea/msigdb/cards/FEEDING_BEHAVIOR	0001	0000	tumor specific responding	0
GO CELL PROJECTION BIOGENESIS	Biological process	25	23	http://www.broadinstitute.org/gsea/msigdb/cards/CELL_PROJECTION_BIOGENESIS	0001	0000	tumor specific responding	1
GO NEUROPEPTIDE RECEPTOR ACTIVITY	Molecular function	22	22	http://www.broadinstitute.org/gsea/msigdb/cards/NEUROPEPTIDE_RECEPTOR_ACTIVITY	0001	0000	tumor specific responding	0
GO AMINE BINDING	Molecular function	23	22	http://www.broadinstitute.org/gsea/msigdb/cards/AMINE_BINDING	0001	0000	tumor specific responding	0
GO INTERMEDIATE FILAMENT CYTOSKELETON	Cellular component	24	21	http://www.broadinstitute.org/gsea/msigdb/cards/INTERMEDIATE_FILAMENT_CYTOSKELETON	0001	0000	tumor specific responding	0
GO INTERMEDIATE FILAMENT	Cellular component	24	21	http://www.broadinstitute.org/gsea/msigdb/cards/INTERMEDIATE_FILAMENT	0001	0000	tumor specific responding	0
GO INNATE IMMUNE RESPONSE	Biological process	23	21	http://www.broadinstitute.org/gsea/msigdb/cards/INNATE_IMMUNE_RESPONSE	0001	0000	tumor specific responding	1
GO OXYGEN BINDING	Molecular function	22	21	http://www.broadinstitute.org/gsea/msigdb/cards/OXYGEN_BINDING	0001	0000	tumor specific responding	0
GO DEFENSE RESPONSE TO BACTERIUM	Biological process	25	20	http://www.broadinstitute.org/gsea/msigdb/cards/DEFENSE_RESPONSE_TO_BACTERIUM	0001	0000	tumor specific responding	0
GO MYOFIBRIL	Cellular component	19	19	http://www.broadinstitute.org/gsea/msigdb/cards/MYOFIBRIL	0001	0000	tumor specific responding	2
GO CELLULAR RESPIRATION	Biological process	19	19	http://www.broadinstitute.org/gsea/msigdb/cards/CELLULAR_RESPIRATION	0001	0000	tumor specific responding	3
GO EXCITATORY EXTRACELLULAR LIGAND GATED ION CHANNEL ACTIVITY	Molecular function	21	19	http://www.broadinstitute.org/gsea/msigdb/cards/EXCITATORY_EXTRACELLULAR_LIGAND_GATED_ION_CHANNEL_ACTIVITY	0001	0000	tumor specific responding	0
GO EXTRACELLULAR LIGAND GATED ION CHANNEL ACTIVITY	Molecular function	22	19	http://www.broadinstitute.org/gsea/msigdb/cards/EXTRACELLULAR_LIGAND_GATED_ION_CHANNEL_ACTIVITY	0001	0000	tumor specific responding	0
GO INTERLEUKIN RECEPTOR ACTIVITY	Molecular function	20	19	http://www.broadinstitute.org/gsea/msigdb/cards/INTERLEUKIN_RECEPTOR_ACTIVITY	0001	0000	tumor specific responding	2
GO TRANSFERASE ACTIVITY TRANSFERRING PENTOSYL GROUPS	Molecular function	20	18	http://www.broadinstitute.org/gsea/msigdb/cards/TRANSFERASE_ACTIVITY_TRANSFERRING_PENTOSYL_GROUPS	0001	0000	tumor specific responding	0
GO EMBRYONIC MORPHOGENESIS	Biological process	17	17	http://www.broadinstitute.org/gsea/msigdb/cards/EMBRYONIC_MORPHOGENESIS	0001	0000	tumor specific responding	1
GO APICAL PART OF CELL	Cellular component	17	16	http://www.broadinstitute.org/gsea/msigdb/cards/APICAL_PART_OF_CELL	0001	0000	tumor specific responding	0
GO VOLTAGE GATED CALCIUM CHANNEL COMPLEX	Cellular component	15	15	http://www.broadinstitute.org/gsea/msigdb/cards/VOLTAGE_GATED_CALCIUM_CHANNEL_COMPLEX	0001	0000	tumor specific responding	0
GO MEMBRANE COAT	Cellular component	17	15	http://www.broadinstitute.org/gsea/msigdb/cards/MEMBRANE_COAT	0001	0000	tumor specific responding	1
GO COATED MEMBRANE	Cellular component	17	15	http://www.broadinstitute.org/gsea/msigdb/cards/COATED_MEMBRANE	0001	0000	tumor specific responding	1
GO MORPHOGENESIS OF AN EPITHELIUM	Biological process	16	15	http://www.broadinstitute.org/gsea/msigdb/cards/MORPHOGENESIS_OF_AN_EPITHELIUM	0001	0000	tumor specific responding	1
KEGG NEUROACTIVE LIGAND RECEPTOR INTERACTION	Environmental Information Processing	272	252	http://www.broadinstitute.org/gsea/msigdb/cards/KEGG_NEUROACTIVE_LIGAND_RECEPTOR_INTERACTION	0001	0000	tumor specific responding	2
KEGG OLFACTORY TRANSDUCTION	Organismal Systems	389	114	http://www.broadinstitute.org/gsea/msigdb/cards/KEGG_OLFACTORY_TRANSDUCTION	0001	0000	tumor specific responding	0
KEGG PROSTATE CANCER	Human Diseases	89	87	http://www.broadinstitute.org/gsea/msigdb/cards/KEGG_PROSTATE_CANCER	0001	0000	tumor specific responding	32
KEGG RENAL CELL CARCINOMA	Human Diseases	70	69	http://www.broadinstitute.org/gsea/msigdb/cards/KEGG_RENAL_CELL_CARCINOMA	0001	0000	tumor specific responding	21
KEGG EPITHELIAL CELL SIGNALING IN HELICOBACTER PYLORI INFECTION	Human Diseases	68	62	http://www.broadinstitute.org/gsea/msigdb/cards/KEGG_EPITHELIAL_CELL_SIGNALING_IN_HELICOBACTER_PYLORI_INFECTION	0001	0000	tumor specific responding	6
KEGG ENDOMETRIAL CANCER	Human Diseases	52	51	http://www.broadinstitute.org/gsea/msigdb/cards/KEGG_ENDOMETRIAL_CANCER	0001	0000	tumor specific responding	23
KEGG VIBRIO CHOLERAE INFECTION	Human Diseases	56	50	http://www.broadinstitute.org/gsea/msigdb/cards/KEGG_VIBRIO_CHOLERAE_INFECTION	0001	0000	tumor specific responding	1
KEGG RETINOL METABOLISM	Metabolism	64	49	http://www.broadinstitute.org/gsea/msigdb/cards/KEGG_RETINOL_METABOLISM	0001	0000	tumor specific responding	0
KEGG STEROID HORMONE BIOSYNTHESIS	Metabolism	55	45	http://www.broadinstitute.org/gsea/msigdb/cards/KEGG_STEROID_HORMONE_BIOSYNTHESIS	0001	0000	tumor specific responding	0
KEGG TASTE TRANSDUCTION	Organismal Systems	52	44	http://www.broadinstitute.org/gsea/msigdb/cards/KEGG_TASTE_TRANSDUCTION	0001	0000	tumor specific responding	1
KEGG REGULATION OF AUTOPHAGY	Cellular Processes	35	33	http://www.broadinstitute.org/gsea/msigdb/cards/KEGG_REGULATION_OF_AUTOPHAGY	0001	0000	tumor specific responding	0
KEGG GALACTOSE METABOLISM	Metabolism	26	25	http://www.broadinstitute.org/gsea/msigdb/cards/KEGG_GALACTOSE_METABOLISM	0001	0000	tumor specific responding	0
KEGG PENTOSE AND GLUCURONATE INTERCONVERSIONS	Metabolism	28	18	http://www.broadinstitute.org/gsea/msigdb/cards/KEGG_PENTOSE_AND_GLUCURONATE_INTERCONVERSIONS	0001	0000	tumor specific responding	0
KEGG ALPHA LINOLENIC ACID METABOLISM	Metabolism	19	17	http://www.broadinstitute.org/gsea/msigdb/cards/KEGG_ALPHA_LINOLENIC_ACID_METABOLISM	0001	0000	tumor specific responding	0
KEGG GLYCOSPHINGOLIPID BIOSYNTHESIS GANGLIO SERIES	Metabolism	15	15	http://www.broadinstitute.org/gsea/msigdb/cards/KEGG_GLYCOSPHINGOLIPID_BIOSYNTHESIS_GANGLIO_SERIES	0001	0000	tumor specific responding	0
BIOCARTA TOLL PATHWAY	Apoptosis - Cell Signaling – Immunology	37	34	http://www.broadinstitute.org/gsea/msigdb/cards/BIOCARTA_TOLL_PATHWAY	0001	0000	tumor specific responding	3
BIOCARTA INFLAM PATHWAY	Cell Signaling-Cytokines/Chemokines	29	29	http://www.broadinstitute.org/gsea/msigdb/cards/BIOCARTA_INFLAM_PATHWAY	0001	0000	tumor specific responding	1
BIOCARTA NKT PATHWAY	Cell Activation - Cell Signaling – Cytokines/Chemokines -Hematopoiesis -Immunology	29	27	http://www.broadinstitute.org/gsea/msigdb/cards/BIOCARTA_NKT_PATHWAY	0001	0000	tumor specific responding	1
BIOCARTA EDG1 PATHWAY	Cell Signaling	27	24	http://www.broadinstitute.org/gsea/msigdb/cards/BIOCARTA_EDG1_PATHWAY	0001	0000	tumor specific responding	5
BIOCARTA RAC1 PATHWAY	Cell Signaling – Neuroscience	23	23	http://www.broadinstitute.org/gsea/msigdb/cards/BIOCARTA_RAC1_PATHWAY	0001	0000	tumor specific responding	5
BIOCARTA CCR3 PATHWAY	Cytokines/Chemokines - Hematopoiesis – Immunology	23	22	http://www.broadinstitute.org/gsea/msigdb/cards/BIOCARTA_CCR3_PATHWAY	0001	0000	tumor specific responding	5
BIOCARTA CYTOKINE PATHWAY	Cell Signaling – Cytokines/Chemokines - Hematopoiesis – Immunology	22	21	http://www.broadinstitute.org/gsea/msigdb/cards/BIOCARTA_CYTOKINE_PATHWAY	0001	0000	tumor specific responding	1
BIOCARTA MTOR PATHWAY	Cell Signaling	23	21	http://www.broadinstitute.org/gsea/msigdb/cards/BIOCARTA_MTOR_PATHWAY	0001	0000	tumor specific responding	7
BIOCARTA COMP PATHWAY	Immunology	19	16	http://www.broadinstitute.org/gsea/msigdb/cards/BIOCARTA_COMP_PATHWAY	0001	0000	tumor specific responding	0
BIOCARTA STEM PATHWAY	Cytokines/Chemokines-Hematopoiesis	15	15	http://www.broadinstitute.org/gsea/msigdb/cards/BIOCARTA_STEM_PATHWAY	0001	0000	tumor specific responding	1
BIOCARTA CDC42RAC PATHWAY	Adhesion-Cell Signaling	16	15	http://www.broadinstitute.org/gsea/msigdb/cards/BIOCARTA_CDC42RAC_PATHWAY	0001	0000	tumor specific responding	4

## Sheet: Sheet2
4	0001	1110	divergent responding	1				419.38		182.36
4	0001	1110	divergent responding	1				0.062688		4.9726
4	0001	1110	divergent responding	1				-0.542		7.5362
4	0011	1100	divergent responding	1				-0.3354		40.207
4	0001	1110	divergent responding	1				-0.023519		1.959
4	0001	1110	divergent responding	1				-1.5505		14.875
4	0001	1110	divergent responding	1				-0.066231		1.2612
4	0100	1011	divergent responding	1				-2.9046		201.15
4	0001	1110	divergent responding	1				-0.22528		13.078
4	0010	1101	divergent responding	1				-0.95728		3.9199
3	0100	0011	divergent responding	0				39.099		26.132
3	1001	0010	divergent responding	-1				52.804		59.667
3	1001	0010	divergent responding	-1				-0.012442		2.9921
3	1101	0110	divergent responding	-1				92.093		17.603
3	0001	0110	divergent responding	0				-0.07927		2.9768
3	1011	0110	divergent responding	-1				-0.092464		48.672
3	1110	0011	divergent responding	-1				-12.796		94.46
3	1001	0010	divergent responding	-1				1.8612		17.433
3	1001	0010	divergent responding	-1				111.19		3.1077
3	1001	1110	divergent responding	0				105.67		4.601
3	1011	1100	divergent responding	0				-1.1642		38.738
3	0110	0001	divergent responding	0				16.931		125.6
3	0001	0110	divergent responding	0				21.87		155.22
3	1001	1110	divergent responding	0				9.1806		19.94
3	0001	1010	divergent responding	1				-2.2031		3.6996
3	0110	1011	divergent responding	1				-0.00010739		0.096016
3	0110	0001	divergent responding	0				0.13489		2.4984
3	0001	1100	divergent responding	1				1.906		6.7217
3	0011	1000	divergent responding	1				-13.295		187.24
3	1100	0010	divergent responding	-1				0.46584		0.7995
3	0001	1010	divergent responding	1				6.4298		4.0639
3	0110	1000	divergent responding	1				28.505		26.675
3	1010	0001	divergent responding	-1				-0.1243		0.091855
3	0101	1011	divergent responding	1				-0.072861		0.20984
3	1011	0101	divergent responding	-1				138.43		93.966
3	1010	0100	divergent responding	-1				-0.1164		2.5827
3	1010	0100	divergent responding	-1				5.7037		28.077
3	0001	1100	divergent responding	1				-22.295		3.8699
3	0001	1100	divergent responding	1				1.8118		24.834
3	1000	0011	divergent responding	-1				1.5955		27.512
3	0010	1100	divergent responding	1				0.15792		0.82294
3	0010	1100	divergent responding	1				-1.6377		56.626
3	0101	1000	divergent responding	1				-6.0519		3.4041
3	1000	0011	divergent responding	-1				-0.023603		0.23617
3	0001	0110	divergent responding	0				-4.8053		11.764
3	0001	0110	divergent responding	0				-22.081		1.3197
3	1001	0111	divergent responding	-1				-1.5377		2.3824
3	1001	0010	divergent responding	-1				33.858		32.944
3	1100	0001	divergent responding	-1				-0.35388		0.32667
3	0101	0010	divergent responding	0				89.562		120.71
3	0101	0010	divergent responding	0				-8.8596		108.12
3	0100	0011	divergent responding	0				-0.0077766		3.4203
3	1000	0101	divergent responding	-1				-0.0042748		4.0131
3	0011	1000	divergent responding	1				-0.0082917		0.85374
3	0010	1100	divergent responding	1				0.48434		9.1174
3	1001	0100	divergent responding	-1				-12.372		-0.0012478
2	1001	0011	divergent responding	-1				3.6762		10.233
2	0100	0001	divergent responding	0				0.042542		-1.2255
2	1000	0010	divergent responding	-1				4.0321		6.7369
2	1011	1000	divergent responding	0				0.016255		8.7311
2	0001	1011	divergent responding	1				-0.15053		-0.00029003
2	0001	0010	divergent responding	0				0.0027191		-1.0532
2	1000	0010	divergent responding	-1				0.2682		-1.348
2	1101	0111	divergent responding	-1				18.568		46.8
2	0001	0100	divergent responding	0				-0.16879		53.14
2	1000	0010	divergent responding	-1				55.272		84.013
2	1000	0001	divergent responding	-1				7.3921		0.69832
2	0001	0100	divergent responding	0				0.41286		-0.34906
2	1000	1110	divergent responding	0				-0.66629		25.223
2	1000	0100	divergent responding	-1				59.255		78.37
2	0001	1000	divergent responding	1				-0.63312		2.7044
2	0010	1110	divergent responding	1				-0.51161		0.0046807
2	1110	0010	divergent responding	-1				4.5414		1.7164
2	1000	0100	divergent responding	-1				-0.61141		26.822
2	0001	0010	divergent responding	0				-0.29461		1.5161
2	0010	1110	divergent responding	1				-0.31748		2.4099
2	1000	0001	divergent responding	-1				2.9971		5.9233
2	1000	0001	divergent responding	-1				0.52808		1.9701
2	1000	0100	divergent responding	-1				0.15948		0.00059413
2	1000	0001	divergent responding	-1				60.422		52.372
2	0111	1101	divergent responding	1				0.71949		28.125
2	0010	1110	divergent responding	1				0.22069		10.085
2	1010	0110	divergent responding	-1				-0.68368		21.926
2	1000	1011	divergent responding	0				1.5134		0.19694
2	0001	1000	divergent responding	1				-0.085865		-0.061898
2	1110	0010	divergent responding	-1				-0.25964		9.8936
2	0100	1110	divergent responding	1				1.8089		4.835
2	1000	0001	divergent responding	-1				0.16026		19.99
2	1000	0010	divergent responding	-1				-3.3405		1.6851
2	0010	1110	divergent responding	1				1.8357		18.601
2	0100	0010	divergent responding	0				-0.51354		17.242
2	1000	0100	divergent responding	-1				-0.26385		21.201
2	1000	1110	divergent responding	0				-0.20964		13.75
2	1000	0010	divergent responding	-1				0.8627		4.4952
2	1000	0010	divergent responding	-1				-0.37831		1.8925
2	0001	1101	divergent responding	1				-0.20421		5.2726
2	0010	0100	divergent responding	0				-0.088682		4.1267
2	0010	1110	divergent responding	1				0.70668		10.405
2	0001	0100	divergent responding	0				1.6227		2.9561
2	0010	1110	divergent responding	1				2.0454		-0.26162
2	1000	0010	divergent responding	-1				2.0454		-0.26162
2	1000	0010	divergent responding	-1				0.022493		1.6547
2	1000	0010	divergent responding	-1				0.97177		-0.1849
2	1110	1000	divergent responding	0				-0.51508		2.209
2	1000	0010	divergent responding	-1				-1.4826		-0.67796
2	1000	0100	divergent responding	-1				-1.6565		39.667
2	0001	1000	divergent responding	1				-0.29416		-0.26831
2	0001	1000	divergent responding	1				-0.99199		1.5271
2	0001	0010	divergent responding	0				-2.7542		26.198
2	0010	0001	divergent responding	0				-0.084439		0.92755
2	1010	0110	divergent responding	-1				9.4582		4.9617
2	1011	1110	divergent responding	0				3.0048		18.488
2	1000	0010	divergent responding	-1				-0.03297		0.65128
2	1000	0001	divergent responding	-1				0.16777		0.3121
2	0001	0010	divergent responding	0				0.69249		34.478
2	1000	0100	divergent responding	-1				0.23542		20.245
2	1000	0001	divergent responding	-1				-0.50038		9.7947
2	0100	1110	divergent responding	1				-0.19532		24.135
2	0100	0001	divergent responding	0				0.040053		1.2627
2	0100	0001	divergent responding	0				0.26847		5.8587
2	0100	0001	divergent responding	0				1.8354		3.5633
2	0001	0010	divergent responding	0				-0.074386		0.039062
2	0010	0001	divergent responding	0				0.93882		17.727
2	1000	0001	divergent responding	-1				-0.20773		0.50537
2	0010	1110	divergent responding	1				0.0028893		16.542
2	0100	0111	divergent responding	0				-0.57378		5.6807
2	0010	0100	divergent responding	0				-0.062367		1.0609
2	1000	0010	divergent responding	-1				-0.1934		0.64742
2	0100	0010	divergent responding	0				-0.0030947		0.00054294
2	1000	0010	divergent responding	-1				-0.72339		9.9492
2	1000	0100	divergent responding	-1				4.2475		1.7723
2	0010	0001	divergent responding	0				1.5658		6.4333
2	0010	1000	divergent responding	1				13.137		0.026539
2	1000	0010	divergent responding	-1				0.15015		8.8739
2	1000	0010	divergent responding	-1				2.7108		12.244
2	0010	0100	divergent responding	0				-1.7036		1.243
2	0001	1000	divergent responding	1				-2.9339		3.8516
2	0001	0111	divergent responding	0				7.5242		12.823
2	0100	0111	divergent responding	0				0.65774		1.589
2	0001	0100	divergent responding	0				-0.24335		-0.038512
2	0001	1000	divergent responding	1				-0.21631		1.9168
2	0010	0001	divergent responding	0				-0.32201		6.2639
2	1000	0100	divergent responding	-1				0.70084		0.00046674
2	0001	0010	divergent responding	0				0.073071		0.35476
2	0010	1000	divergent responding	1				-0.23962		0.10387
2	0001	1000	divergent responding	1				1.9055		1.6799
2	1000	0100	divergent responding	-1				-1.3537		16.061
2	1000	0100	divergent responding	-1				36.219		4.8229
2	0001	1000	divergent responding	1				-3.654		3.4698
2	1000	0100	divergent responding	-1				5.3634		2.9336
2	0010	1000	divergent responding	1				-0.26547		10.969
2	1000	0100	divergent responding	-1				4.1834		29.231
2	0111	0010	divergent responding	0				8.4552		5.3456
2	1011	1000	divergent responding	0				0.27581		6.2618
2	0100	1000	divergent responding	1				-0.18642		-0.52287
2	1110	1000	divergent responding	0				-0.52625		35.994
2	0100	0010	divergent responding	0				24.423		3.2153
2	0100	0111	divergent responding	0				6.9802		5.0948
2	1110	0010	divergent responding	-1				5.837		23.543
2	0010	0001	divergent responding	0				-0.34282		0.079713
2	0001	1000	divergent responding	1				-0.023799		-0.99843
2	0001	1000	divergent responding	1				-1.3785		-0.048121
2	0100	1000	divergent responding	1				1.0175		28.378
2	0001	1000	divergent responding	1				-0.50547		33.695
2	0100	0010	divergent responding	0				-0.32011		0.37633
2	0001	1011	divergent responding	1				-0.87353		94.798
2	1000	0010	divergent responding	-1				0.098642		-0.37164
2	0010	0100	divergent responding	0				-0.61181		26.32
2	0010	0100	divergent responding	0				6.8915		6.3079
2	1000	1110	divergent responding	0				0.00022717		6.1633
2	0100	1000	divergent responding	1				4.0687		4.832
2	0001	0100	divergent responding	0				0.040409		0.28307
2	0001	0111	divergent responding	0				-0.33641		33.735
2	0001	0010	divergent responding	0				0.0038717		1.8089
2	0010	1000	divergent responding	1				-0.0045673		9.2328
2	0100	0111	divergent responding	0				0.013455		7.4246
2	1000	0001	divergent responding	-1				0.00054974		2.5375
2	1000	0010	divergent responding	-1				-1.4407		3.5052
2	1000	0100	divergent responding	-1				-0.43702		0.31048
2	1011	0010	divergent responding	-1				0.97724		9.305
2	1011	0010	divergent responding	-1				0.0057998		2.7835
2	1110	0111	divergent responding	-1				-0.60703		0.0015352
2	0010	1000	divergent responding	1				27.433		4.1695
2	1000	0100	divergent responding	-1				0.31379		11.027
2	0010	1000	divergent responding	1				-0.9547		3.5742
2	1011	0111	divergent responding	-1				-0.096327		14.444
2	0001	0100	divergent responding	0				-0.94226		0.01522
1	0101	0111	divergent responding	0				2.7995		10.799
1	1010	0010	divergent responding	-1				0.91614		-0.070955
1	1010	1000	divergent responding	0				1.9804		0.0017994
1	1010	1000	divergent responding	0				0.54398		0.002666
1	1100	1101	divergent responding	0				-0.15667		-0.41395
1	0101	0111	divergent responding	0				0.42953		0.0080253
1	1010	1110	divergent responding	0				-0.05437		-0.53676
1	1000	1010	divergent responding	0				6.9641		0.8268
1	0011	0010	divergent responding	0				1.9843		0.40303
1	0001	0101	divergent responding	0				0.52657		0.056247
1	1001	0001	divergent responding	-1				-1.5139		0.075073
1	1000	1010	divergent responding	0				0.87343		14.908
1	0010	0011	divergent responding	0				-0.54408		4.2187
1	1010	0010	divergent responding	-1				-1.0134		2.4305
1	0101	0111	divergent responding	0				-0.54408		4.2187
1	1010	1000	divergent responding	0				-1.0134		2.4305
1	0011	0010	divergent responding	0				-0.22266		-0.22302
1	0110	0010	divergent responding	0				0.00028395		10.003
1	0110	0100	divergent responding	0				-0.0036789		8.5252
1	1100	1000	divergent responding	0				29.961		11.182
1	0011	0010	divergent responding	0				0.018456		-0.48352
1	0011	0010	divergent responding	0				12.194		2.7308
1	0110	0100	divergent responding	0				-0.89096		17.405
1	0100	0110	divergent responding	0				-0.10245		0.58242
1	0001	0101	divergent responding	0				0.076149		0.035876
1	0011	0001	divergent responding	0				0.52781		-0.061383
1	1000	1010	divergent responding	0				0.066028		18.781
1	0001	0101	divergent responding	0				-0.18787		0.69402
1	1010	1000	divergent responding	0				-0.18787		0.69402
1	0101	0100	divergent responding	0				2.0009		5.7656
1	0101	0001	divergent responding	0				0.00023734		-0.36877
1	0101	0111	divergent responding	0				12.847		5.8351
1	1000	1100	divergent responding	0				5.1406		0.44685
1	1100	1000	divergent responding	0				0.15047		-0.0087969
1	1011	1010	divergent responding	0				6.4336		-0.50231
1	0100	0110	divergent responding	0				-0.76008		-0.048499
1	0101	0111	divergent responding	0				0.9694		3.6291
1	1001	1000	divergent responding	0				-0.32287		8.2391
1	0010	0011	divergent responding	0				-0.015002		8.6782
1	0100	0101	divergent responding	0				-1.6107		-0.10466
1	0101	0001	divergent responding	0				-1.0561		1.0136
1	0100	1100	divergent responding	1				-0.80859		-0.12054
1	1001	1000	divergent responding	0				-1.0591		11.777
1	0011	0010	divergent responding	0				0.0012559		-0.29209
1	0010	1010	divergent responding	1				0.00086599		4.4811
1	0010	1010	divergent responding	1				-0.5949		-0.87425
1	1000	1100	divergent responding	0				0.1307		4.3409
1	1100	1000	divergent responding	0				-0.44127		-0.81231
1	0011	0010	divergent responding	0				-2.7802		-1.4916
1	0001	0011	divergent responding	0				-0.0032851		1.3983
1	1000	1100	divergent responding	0				-0.97068		-0.13085
1	1000	1100	divergent responding	0				0.37173		2.0744
1	1100	0100	divergent responding	-1				0.01415		0.27179
								0.47872		-0.11276
								0.51321		10.977
								0.51321		10.977
								0.13556		2.4385
								0.26885		4.2591
								-0.011373		11.629
								-1.0779		0.75627
								1.2214		3.3087
								-0.23516		17.12
								0.00092351		19.142
								-26.686		330.33
								9.0593		9.5773
								0.0058324		-1.2523
								-2.5637		0.26452
								0.76632		102.81
								-0.42467		-0.14057
								2.4326		1.859
								11.029		3.2942
								-9.5187		839.33
								3.6145		7.9096
								-0.5661		-0.078674
								3.3921		0.30781
								-0.076951		5.7329
								-0.11337		0.029063
								-0.44977		1.2419
								0.56632		0.68212
								-0.41264		0.54449
								3.9204		1.6568
								5.6373		2.9973
								-1.5582		38.838
								-0.10813		0.10715
								0.23327		0.22664
								-0.10592		8.0163
								1.7852		18.445
								-0.067694		0.63082
								16.629		5.1438
								-5.493		39.076
								-0.55168		24.988
								-0.16977		0.2501
								3.5075		28.293
								-0.066774		0.1802
								-1.2324		5.5073
								-0.27327		0.56781
								0.022348		9.8242
								-0.0056576		3.2633
								13.17		2.9328
								-0.64811		19.407
								0.12078		14.133
								0.17657		6.2824
								1.2693		10.628
								0.0022316		0.2121
								1.7319		14.827
								-3.2226		5.2849
								-0.81604		0.010497
								-0.0013323		0.57754
								9.8595		2.5719
								0.56237		0.42271
								0.19367		0.17935
								-0.54649		4.3555
								-1.7165		1.0593
								0.12968		-0.32691
								-0.11185		-0.02274
								-1.8864		2.15
								-1.2355		0.10502
								0.29003		18.963
								0.13127		8.9528
								-0.70779		3.4504
								0.00096841		1.2805
								1.7254		2.9954
								-1.0213		1.1416
								0.97823		0.68825
								0.020436		0.00067742
								-0.017039		2.9511
								-1.6427		1.4425
								-0.18244		4.4291
								-0.29279		0.017574
								-1.4049		1.9899
								-0.0064586		15.394
								0.026997		1.4488
								-0.45503		0.12105
								-0.28831		0.35236
								0.24294		30.261
								-0.48095		-0.013904
								0.039005		6.8942
								-0.44299		6.2259
								-0.01325		1.1136
								0.013495		-0.0038554
								0.0055665		-0.013118
								-0.012236		0.039004
								1.6496		-0.011406
								-0.73586		-0.1197
								-0.85866		10.468
								-1.5494		1.3131
								-1.8654		-1.1327
								0.10783		-0.63013
								-0.52733		0.25758
								-0.52548		0.18292
								-0.067853		-0.27344
								-1.2922		-2.51e-05
								-0.037025		1.2011
								-1.0922		-0.13145
								-0.87206		-0.18022
								0.70193		25.336
								0.017396		-1.6199
								2.4249		-0.50863
								0.43077		22.527
								-0.61784		0.46304
								-0.24919		0.94074
								-0.41175		-0.27159
								-0.18271		0.33526
								-1.6543		7.827
								-0.38387		-0.24534
								-0.48217		28.373
								-0.98793		0.14609
								-0.77318		-0.95299
								0.51741		3.9217
								-1.436		-0.00049215
								-0.34345		1.9553
								16.056		6.8525
								3.1846		0.070868
								314.25		1091
								39.824		621.38
								39.824		621.38
								32.702		17.217
								423.66		1387.7
								572.88		104.79
								136.31		107.37
								21.307		52.733
								21.307		52.733
								375.4		161.97
								142.18		39.543
								276.79		469.6
								113.31		65.299
								93.93		14.912
								116.07		20.348
								56.596		174.4
								77.404		148.9
								65.065		105.03
								112.56		190.59
								100.43		26.368
								75.186		135.72
								42.616		21.079
								144.86		72.879
								144.86		72.879
								6.1203		5.3629
								16.864		14.952
								13.904		0.89789
								11.695		21.607
								10.717		0.68451
								17.996		4.1637
								339.77		963.69
								16.198		15.706
								100.79		115.04
								790.8		1374
								471.44		821.29
								60.632		130.21
								69.918		40.439
								1.8758		21.134
								13.42		106.47
								447.4		62.79
								65.67		21.342
								242.05		94.323
								-0.11518		44.94
								0.023189		0.93345
								4.5807		23.511
								3.5817		-1.3865
								4.3011		32.027
								1.996		28.533
								4.428		85.375
								38.413		8.7371
								0.0056233		-0.0011703
								5.299		68.581
								0.65364		-0.4071
								0.18582		2.5307
								1.7242		44.444
								98.181		18.524
								98.181		18.524
								1.4576		1.9165
								58.458		7.332
								27.168		0.55487
								-0.017153		-0.013386
								6.1334		8.8804
								0.12371		20.269
								11.559		0.55439
								370.2		47.389
								39.824		1.2493
								42.131		0.18806
								-0.54058		8.6092
								-0.46356		27.708
								62.71		0.37987
								0.0055377		1.6905
								99.713		69.405
								2.8044		0.16057
								0.3811		27.822
								-0.48219		13.375
								3.1e-06		8.3551
								3.0708		0.17941
								-0.0018983		9.1352
								0.90106		2.522
								2.4319		13.803
								0.66763		-0.00052724
								2.0839		21.544
								6.9505		47.406
								4.0889		2.57
								3.9964		-0.048378
								-0.077733		-0.16604
								12.96		4.6891
								5.0715		1.0169
								-0.25357		-0.34052
								138.44		0.7448
								4.81		0.033673
								0.80077		-0.13493
								0.015608		0.080381
								-0.22278		-0.29336
								0.17122		1.4477
								1.3174		2.4944
								-0.72453		8.6063
								2.1391		-0.3183
								32.959		0.41986
								9.1568		1.8963
								-0.018536		0.12079
								1.1084		12.805
								-0.028775		2.9878
								0.0029288		-0.016631
								-0.1785		0.30031
								0.39215		3.4698
								0.11476		-0.059553
								-0.22703		1.2643
								2.5359		0.90022
								3.3		29.948
								1.5062		0.10666
								32.257		8.4591
								2.7399		2.8852
								-0.33528		0.013692
								5.3734		0.72349
								9.4688		1.2279
								0.73979		1.038
								-0.28962		0.75509
								39.879		5.703
								11.577		6.8292
								2.0324		4.0134
								1.3767		-0.0087761
								0.0016595		-0.09367
								4.5802		14.744
								33.031		12.958
								-0.90168		0.2242
								0.50359		-1.5445
								102.68		31.077
								0.82172		-0.36674
								16.342		22.818
								-0.33946		-0.22398
								41.524		6.8039
								120.9		25.031
								0.020891		0.03859
								-0.032711		0.40365
								0.33359		10.018
								46.571		10.222
								18.473		2.9572
								29.683		18.105
								3.2073		6.3377
								1.5337		0.68665
								0.22688		-0.7614
								24.026		0.271
								2.7659		-0.10915
								0.019695		-1.0772
								-0.12515		-0.66415
								-1.0158		-0.71984
								14.389		10.863
								-0.010389		0.011189
								0.55994		0.016333
								4.2376		6.3927
								82.367		17.936
								23.241		0.17818
								-0.098531		-0.88476
								-0.35252		0.068067
								-0.19388		-1.1084
								13.021		-0.46564
								2.8638		0.012723
								0.098186		3.7753
								21.864		-0.30947
								0.76435		-0.17668
								-0.014173		-1.6694
								0.11169		0.47936
								0.002098		-0.55598
								18.918		-0.061694
								0.18253		-0.13086
								-0.66598		-0.0080761
								1.8111		0.18488
								-2.5743		0.057571
								1.4059		2.428
								0.31113		6.9546
								1.9512		0.010002
								1.0899		3.3028
								1.3885		2.6054
								0.012843		0.77996
								33.976		0.93453
								8.0771		14.781
								-0.16064		-0.49437
								10.409		-0.67507
								0.23672		7.368
								-0.62223		20.349
								4.7127		-0.2587
								1.8212		0.021384
								-0.053958		-0.083421
								-0.086678		-0.21304
								0.061184		2.5017
								0.12464		-0.0076472
								0.77981		3.9459
								0.91924		0.76191
								0.47667		0.061696
								0.25479		-0.0032272
								1.064		-0.05264
								0.0062359		-1.1049
								-0.55447		-0.40375
								0.014714		0.023493
								-0.96966		-0.13589
								5.944		-0.0046858
								-0.092415		-0.020504
								33.278		7.4484
								-0.092415		-0.020504
								-0.092415		-0.020504
								0.70329		16.02
								0.081343		1.7217
								7.0259		-0.58526
								-0.91435		-0.5607
								5.7607		0.00010495
								17.642		9.1207
								-0.35517		-0.0611
								6.3124		1.7926
								4.197		12.81
								-0.0022212		2.9221
								4.8277		12.437
								-0.32531		-0.30651
								-0.030186		3.4368
								0.28162		-0.0016483
								0.34589		-0.022039
								4.0571		-0.11793
								1.3077		13.981
								1.4702		84.9
								-0.00058874		0.49143
								27.597		21.179
								-0.00013809		1.2518
								2.3331		29.435
								8.4507		5.6499
								25.052		3.8282
								11.265		7.4717
								-0.83587		2.4183
								0.65268		0.0002121
								10.516		5.297
								49.201		1.3468
								18.479		-0.47443
								29.191		23.035
								-1.8877		-0.69092
								1.7576		4.5401
								2.4676		0.24559
								-0.66699		11.726
								-0.82952		135.09
								12.494		52.969
								-0.0091227		4.4224
								11.057		41.253
								0.48568		11.666
								3.7575		18.088
								0.16612		33.373
								0.11909		32.591
								0.46209		23.519
								-0.39518		6.1031
								-0.02967		8.8707
								5.7299		32.706
								-0.089666		10.32
								26.13		140.11
								116.05		23.289
								26.35		160.39
								0.025179		4.8076
								5.3361		68.898
								22.252		1.858
								55.87		-1.0364
								10.767		1.1013
								18.024		71.195
								7.5016		0.12553
								12.334		50.842
								19.225		1.4045
								17.307		1.0594
								0.010709		-1.3805
								-0.066319		51.829
								5.4706		132.07
								-3.09		0.0046165
								0.90333		-1.3695
								-0.032869		-0.23989
								-0.26977		-0.16267
								3.739		1.0015
								24.096		1.1624
								1.2838		2.1381
								5.3462		6.3632
								-13.015		-1.1666
								3.0302		-0.1036
								-0.73163		-0.13426
								-0.79565		-0.48733
								2.1402		0.92129
								-1.4947		2.121
								-0.80382		-0.35821
								-11.468		-1.8047
								-2.7866		-0.55768
								-0.6762		1.478
								2.388		-0.0003032
								1.6412		-0.044699
								1.7271		5.742
								0.50818		0.62299
								93.18		84.057
								-19.313		-2.1159
								20.045		34.439
								-0.15744		0.010311
								0.098121		-0.50647
								-3.7426		-0.92897
								51.09		35.196
								0.055514		-0.42466
								-0.03671		0.33716
								0.050877		-1.3197
								0.015229		2.1279
								0.096481		-0.068847
								0.63366		-0.13059
								-0.22522		-2.3541
								-0.32621		8.6662
								-3.2746		1.1714
								5.0682		-1.1246
								0.74203		14.5
								0.45511		0.16707
								-0.24663		2.0952
								0.21337		-0.02645
								2040.7		1385.1
								-0.88715		0.5887
								6.075		0.040268
								1.0287		0.50698
								17.341		21.293
								-0.59928		0.31128
								-0.049872		2.791
								-4.7371		-1.1645
								-0.71369		0.059355
								0.31273		-0.032393
								-0.82221		-1.2347
								0.0032218		2.4817
								-1.0189		27.007
								-0.98433		1.3573
								-0.14907		0.94906
								-2.983		3.1075
								0.11252		-0.68145
								-4.8145		-2.0824
								4.0377		-0.003204
								0.10604		-1.313
								153.79		30.202
								0.85894		0.0036352
								6.3296		5.3848
								-0.07028		0.14476
								-4.5696		-4.0185
								-0.015029		-1.4485
								0.19136		-0.85864
								-1.871		0.51538
								4.7157		-0.47344
								83.196		27.688
								17.665		3.6055
								-1.2813		-0.48637
								6.4837		-0.87539
								-2.3504		-0.048266
								18.743		83.68
								-0.0011444		18.907
								0.3409		10.671
								0.4328		0.19834
								0.0039863		-0.034608
								-1.1587		0.094342
								0.30834		1.6696
								-0.06379		0.02782
								-5.3354		8.8291
								-1.3283		0.1115
								-1.3127		2.5364
								-0.47578		-0.15282
								-1.3342		4.0835
								-2.7258		-2.8065
								8.2258		6.6733
								-0.14646		-0.90815
								1.8735		1.0206
								0.30141		2.2307
								1.0017		19.834
								-0.63092		4.0352
								6.5567		1.2333
								0.9341		-1.0885
								-0.028665		-0.013689
								-0.00042392		7.1294
								0.57809		10.468
								-0.025652		-0.091621
								-1.7387		1.1646
								-0.47725		-1.4914
								0.31742		2.7642
								-1.5098		2.0931
								-1.1092		0.028905
								-9.23e-05		1.2991
								-2.9993		0.71928
								0.18972		11.495
								0.61131		9.9703
								-0.75806		2.5298
								1.7603		0.075223
								0.046738		-0.043736
								0.50216		-0.0026113
								-2.5841		0.21932
								-1.5259		-0.11623
								-0.029564		0.40203
								-6.4188		-1.8842
								2.3593		18.448
								4.1471		10.899
								-1.6368		-0.11318
								22.989		20.751
								-0.24477		0.093755
								-2.1114		3.0229
								1.3497		0.37601
								0.095703		-0.28412
								0.070499		8.8419
								0.87133		1.2475
								-0.2054		-1.3413
								-0.28008		17.293
								0.69509		1.5324
								0.15917		-0.052857
								-0.061299		2.5544
								-3.3703		0.010514
								-1.626		4.0767
								-3.1501		-2.3681
								0.026872		-1.2419
								0.073305		-0.19201
								-1.9748		1.3282
								8.1963		0.76921
								-0.13768		0.13315
								23.428		21.226
								-0.36821		0.21437
								-0.30867		-0.85985
								-0.45592		3.9931
								0.075038		8.4827
								0.075038		8.4827
								-0.32089		-1.1845
								0.050468		-0.44479
								-4.4248		0.21668
								-0.76936		-0.98076
								-0.99964		1.1375
								-0.25271		0.57584
								13.387		2.7498
								-0.75639		-0.0094
								-0.38785		5.146
								-0.11657		0.40595
								-0.85613		-0.0090106
								0.48091		-0.14194
								-0.089176		1.8593
								-0.77948		0.62752
								0.014406		7.8292
								13.404		0.21834
								-0.031385		6.0967
								0.65168		15.23
								-2.1242		-0.0030146
								0.0034243		-0.0058641
								0.39754		4.8201
								4.6417		15.842
								7.4813		1.9832
								-0.37338		2.688
								-0.025428		0.0193
								-1.8382		0.023747
								2.0892		16.256
								-0.44408		9.712
								-0.067228		0.069529
								5.8581		2.537
								-0.53564		5.96
								-0.79575		0.056114
								16.674		23.349
								-1.1879		1.0017
								2.192		2.1308
								-0.69484		0.67736
								-0.05085		0.12115
								1.4821		4.7363
								0.54236		-0.043127
								0.43018		-0.55605
								2.5035		-0.0020279
								-0.14565		-0.23231
								-0.50981		1.3157
								-0.070713		-0.056691
								-1.2761		3.8959
								-0.021333		-0.42276
								0.064627		0.00020521
								0.72339		2.0869
								0.33054		1.5767
								0.90361		0.38289
								-0.15107		1.3699
								12.227		2.4642
								-0.16593		1.9916
								-0.32979		-0.77918
								-0.37068		0.68273
								-0.37068		0.68273
								-0.20235		2.15e-05
								-2.2767		0.36341
								-1.1736		8.492
								-1.6583		-0.088498
								-0.80521		-1.3218
								-0.037363		2.0076
								-0.20235		2.15e-05
								2.0162		-0.44546
								-0.091491		1.6192
								-0.6932		-0.2181
								-0.85092		0.49004
								1.1803		0.36722
								-1.0915		-0.11855
								-0.087664		1.4879
								2.4758		4.4631
								14.715		0.66835
								-0.4029		0.85444
								2.7679		1.9828
								-1.0604		0.00017143
								-1.8257		0.14589
								0.0057776		-1.074
								-0.51529		23.043
								0.087818		71.317
								0.0031775		0.014125
								-0.29732		-0.77271
								-0.46828		0.24749
								-0.91103		-0.21922
								0.32559		0.19296
								0.45634		0.00060015
								-0.5934		-0.13205
								-1.1341		-0.17196
								16.84		7.6789
								-0.0013537		-1.0171
								-0.42422		0.1445
								0.0056114		17.753
								8.6315		0.55717
								1.3967		3.4566
								-0.0035221		0.0025974
								1.2509		2.8494
								0.11041		1.4733
								-0.28346		1.865
								-0.040416		5.54
								1.0225		2.7356
								0.0025199		1.4375
								-0.61066		0.055715
								-0.12099		5.8682
								-0.19376		0.056761
								-0.70363		0.10154
								-0.63696		0.18167
								70.241		85.15
								-0.34814		-0.090598
								-1.153		-0.0056252
								0.011055		0.37051
								0.26142		1.2338
								0.013243		-0.80482
								55.962		67.47
								-0.12275		3.7349
								-1.6506		-0.51418
								-1.6643		-0.018576
								-0.11243		-0.090908
								-0.044091		0.27653
								-1.2733		0.00016003
								-0.29378		0.46125
								-0.39757		-1.5991
								-0.093354		0.017174
								1.3802		-0.18985
								-0.19083		2.2962
								9.7438		2.4327
								0.035286		0.9867
								-0.036044		-0.061552
								7.7916		12.319
								-0.031501		11.063
								2.4051		2.6457
								-1.3394		-0.017988
								-1.0317		7.3383
								-0.00279		0.64371
								-0.0044116		0.11343
								0.017776		1.1666
								-1.1506		0.0074606
								-0.016676		-0.55229
								-2.1113		0.0022267
								1.4414		1.3212
								-0.23997		-0.1458
								-0.54067		-0.87826
								3.9244		-0.68508
								0.0076278		-0.0020802
								-0.00097324		0.57191
								-1.7421		0.0055689
								-0.34816		0.92178
								-0.63087		-1.1268
								-2.4507		0.149
								-0.12179		-0.085435
								39.232		0.34441
								-0.69218		-0.20057
								1.3553		-1.1018
								-0.018862		-0.037721
								-0.44372		13.138
								-0.44372		13.138
								1.0469		12.753
								0.078		5.0299
								-1.1344		0.19308
								0.73307		-0.016155
								-0.15287		1.7884
								-0.029704		0.003061
								7.2208		12.431
								-1.1777		-0.87048
								0.085611		1.1201
								5.228		1.5124
								-0.030239		-0.82988
								-1.3839		0.00023916
								-0.13529		1.5824
								-0.2143		0.016636
								-0.49695		-0.059929
								-0.55268		-0.064493
								-1.344		2.0502
								-0.014329		0.3106
								-0.80532		-0.21656
								-0.29238		-0.19969
								-1.7085		0.26977
								-0.025376		-0.33772
								-0.013545		0.90541
								1.0894		0.06725
								-1.342		-0.066654
								-0.080893		-0.30776
								-0.00078819		0.13074
								0.3427		0.15177
								6.2259		0.47057
								-0.35169		0.27714
								-0.44268		-0.003842
								-0.10283		5.9475
								0.028262		1.0183
								-0.51846		0.65116
								0.4108		-0.022372
								16.922		9.9652
								24.784		58.48
								1.1847		0.0010211
								2938.8		1969.9
								11.433		14.353
								6.0834		-0.015251
								-0.61765		5.0827
								0.087325		-0.025333
								0.00070064		0.068757
								0.33275		1.5
								0.80914		-0.17558
								0.25442		-0.18057
								17.767		20.003
								24.85		6.2269
								-0.93293		-0.49037
								13.361		0.57563
								0.0026074		5.7567
								-2.0425		0.74143
								-0.6298		34.983
								8.5724		-0.067671
								-0.36659		8.3586
								57.689		176.42
								0.004251		-0.1461
								1.2007		-0.013142
								0.43888		1.0056
								0.013814		0.98984
								0.45791		-0.055867
								-0.14121		-2.654
								0.00014929		-0.46078
								-0.030955		7.7657
								-0.73887		0.20918
								-0.041801		-0.0048885
								-0.64233		4.5395
								4.6384		4.4351
								-0.69957		1.5441
								-0.70152		20.245
								-0.41414		0.67441
								-0.1088		-0.19132
								-0.27616		-0.12101
								3.2509		4.9772
								-0.29046		-0.024619
								0.050259		3.7875
								2.8111		1.8353
								-0.2816		0.11918
								3.1978		-0.17763
								-4.4107		-0.10338
								1.6106		-0.27392
								-0.54997		8.4168
								-1.442		1.2131
								0.5104		7.0578
								-0.26042		0.63502
								0.0013929		-0.74526
								-0.10375		-1.2063
								1.7522		3.2389
								0.53456		0.19855
								-0.87194		-0.35516
								0.70713		-0.35381
								2.1672		-0.49226
								0.016449		-0.073492
								-0.2063		0.092069
								-0.39866		-0.30549
								-0.013037		-0.077853
								0.021345		-1.3581
								-1.452		0.041666
								-0.17806		-0.14807
								-0.32811		-0.015299
								-0.31638		0.37036
								-0.93642		-0.049325
								-0.022825		1.3988
								-0.51654		-1.7357
								15.014		1.1662
								0.66251		4.8563
								1.0905		0.13448
								70.871		-0.21231
								-1.4969		0.017052
								0.1426		0.56885
								0.67765		0.38232
								0.46424		-0.13099
								0.46544		9.891
								44.817		61.15
								13.712		38.371
								0.28908		53.011
								52.28		54.215
								276.82		119.49
								280.18		109.98
								91.313		3.5797
								85.591		3.0851
								0.27085		155.42
								-0.00041198		28.655
								3.0651		2.8147
								6.6904		109.15
								33.17		23.457
								50.709		450.34
								0.9348		40.806
								66.87		18.785
								37.187		81.712
								82.324		52.773
								486.09		164.99
								9.2675		10.318
								13.387		28.87
								32.846		27.191
								0.16992		62.376
								10.826		262.1
								-0.016348		42.673
								0.30421		21.141
								16.956		30.353
								12.073		12.16
								830.91		1011
								0.10368		2.1875
								7.6031		26.578
								5.7157		25.079
								2.1031		4.3722
								118.92		52.732
								4.8419		0.79028
								-0.25045		19.076
								0.21545		4.5649
								9.7722		22.092
								51.698		18.599
								149.19		15.425
								1.9513		108.32
								-2.6807		12.638
								0.20475		24.776
								919.47		198.53
								0.63342		6.8899
								25.287		16.26
								128.18		26.292
								0.0060647		0.99923
								615.58		113.46
								2.5318		0.90718
								8.446		2.8629
								2.3096		0.24668
								-2.0598		4.4671
								8.0189		0.4204
								7.0171		11.22
								864.99		314.14
								32.819		247.37
								0.20481		-0.43466
								51.147		1.7148
								0.076924		43.454
								40.313		21.842
								3.9159		24.446
								202.7		290.1
								-0.53092		0.97317
								384.07		82.727
								-0.48098		13.658
								101.68		131.3
								-0.74477		18.661
								171.15		20.597
								1.9683		11.305
								-1.0014		3.2312
								60.323		16.969
								0.0023695		11.951
								-0.11132		78.615
								68.667		73.677
								1.0592		3.1767
								6.279		1.0161
								0.16599		-0.012192
								185.38		42.21
								-0.0036295		13.532
								2.7616		4.9653
								182.38		35.945
								-0.088762		30.345
								0.39363		28.922
								0.94689		29.62
								-0.48706		5.1315
								2.0124		11.889
								-3.2419		2.1786
								6.7499		1.0477
								21.213		41.865
								-0.46053		11.718
								0.022908		3.1151
								3.2161		4.1356
								2.1928		2.36
								0.34703		1.7555
								2.2651		25.069
								4.7267		8.6976
								-0.60994		5.9958
								4.2594		3.9473
								17.093		23.886
								0.012345		5.7852
								-0.29738		13.958
								0.61582		22.539
								-0.0022402		38.082
								0.17758		2.0676
								0.14453		0.0093669
								-4.254		13.854
								38.047		9.1765
								0.20625		-0.025472
								9.846		31.213
								7.8174		2.2626
								3.5001		34.54
								-0.18747		0.4224
								11.175		167.06
								11.175		167.06
								-0.056323		0.24368
								5.808		0.48422
								-0.008303		6.9373
								12.871		0.97082
								2.3468		2.4466
								6.4479		0.13614
								26.156		16.264
								108.09		0.36177
								17.389		1.1509
								18.485		5.9758
								-0.011716		10.344
								-0.58221		0.62885
								2.3234		1.7462
								0.042412		11.525
								-0.50729		-0.43817
								2.3247		8.0398
								3.5145		5.0647
								1.9189		-0.88805
								2.0968		0.047032
								0.12928		0.00045812
								5.8314		0.36489
								65.819		11.056
								-0.057548		1.2944
								7.6135		3.6661
								-0.78365		0.0040598
								0.28044		3.2457
								1.3372		8.1888
								2.5644		4.4868
								-0.78038		8.2035
								-0.11566		-0.03649
								42.437		23.305
								0.049393		1.634
								0.32743		8.7575
								0.0066725		0.012416
								2.7522		11.521
								-0.51231		11.915
								0.75958		9.3624
								49.534		39.049
								4.1722		0.52001
								0.060865		-0.69668
								0.054314		0.63832
								13.369		13.501
								11.044		1.5688
								9.1256		0.011878
								0.63034		2.1238
								0.013242		3.0929
								0.70224		0.63155
								14.792		3.1912
								0.77116		-0.13646
								4.1791		2.5146
								0.10977		-0.2676
								0.52255		0.053289
								48.963		53.699
								1.8428		-0.13813
								-0.089025		2.6701
								2.7386		196.52
								10.923		331.09
								0.0087099		9.7918
								1.2789		0.26165
								1.1916		43.821
								1.0087		39.446
								321.68		69.084
								-0.025928		0.45739
								-0.15724		0.63204
								0.054583		0.39786
								4.0117		2.0045
								10.232		40.639
								105.65		167.09
								6.2903		-0.009519
								2.2235		0.16952
								39.635		419.23
								47.009		15.838
								0.045208		0.23132
								18.67		0.43329
								0.2155		1.9703
								-0.70852		4.2147
								0.51083		20.462
								-0.059297		20.628
								-0.08594		2.9592
								0.37908		2.1366
								0.46884		27.985
								6.5412		55.157
								0.12995		9.8273
								-0.33156		2.4711
								81.908		158.74
								15.195		4.4839
								1.6191		1.9628
								0.54259		0.010969
								-0.010029		1.8447
								-0.84221		8.7928
								100.37		41.921
								15.735		118.84
								6.6504		32.558
								-0.092344		3.1593
								2.3878		0.20418
								2.074		21.468
								-0.0034647		2.7739
								-0.17857		-1.1509
								7.6024		1.1718
								34.373		15.178
								-0.053607		0.0042321
								0.21409		0.33448
								0.78705		2.1324
								1.5159		3.4316
								3.6575		4.0579
								-0.83104		8.0795
								-1.1142		3.0525
								9.9097		5.0607
								-0.25535		0.23669
								60.782		0.85536
								-0.20274		-0.00039396
								9.5553		69.692
								0.028608		-0.04967
								-0.051721		5.4678
								10.445		0.77213
								0.0024304		-0.19737
								7.8708		2.782
								4.5782		-0.33071
								0.18614		0.055309
								13.932		0.98356
								9.8128		3.6227
								-0.16227		0.5134
								0.39017		-0.099965
								0.027359		1.9571
								9.4901		0.47358
								0.015831		26.249
								12.051		212.55
								0.95419		1.5589
								13.223		6.9313
								-0.73411		5.6133
								-0.11173		4.6754
								13.011		23.681
								1.5213		-0.63538
								0.69796		23.526
								98.825		134.8
								-0.46109		0.43503
								4.3819		3.6012
								78.634		53.09
								78.634		53.09
								0.87809		-0.087882
								0.010585		4.8296
								1.1154		72.693
								2.5551		6.0358
								-0.82624		0.7831
								-0.72753		0.15086
								-0.059319		0.10799
								1.7526		0.53512
								-0.31116		5.6353
								-0.58458		-0.64748
								0.12909		2925.9

## Sheet: Sheet3
terms	OMIC gene counts		tumor specific responding	61		normal specific responding	76		no responding	39		consistent responding	10		divergent responding	55
tumor specific responding	61		tumor specific responding	49		normal specific responding	46		no responding	38		consistent responding	7		divergent responding	52
tumor specific responding	24		tumor specific responding	35		normal specific responding	39		no responding	33		consistent responding	5		divergent responding	52
tumor specific responding	3		tumor specific responding	35		normal specific responding	28		no responding	33		consistent responding	5		divergent responding	44
tumor specific responding	4		tumor specific responding	33		normal specific responding	28		no responding	30		consistent responding	4		divergent responding	38
tumor specific responding	22		tumor specific responding	33		normal specific responding	28		no responding	27		consistent responding	4		divergent responding	38
tumor specific responding	3		tumor specific responding	32		normal specific responding	25		no responding	26		consistent responding	4		divergent responding	37
tumor specific responding	19		tumor specific responding	29		normal specific responding	24		no responding	24		consistent responding	3		divergent responding	35
tumor specific responding	6		tumor specific responding	27		normal specific responding	23		no responding	24		consistent responding	3		divergent responding	34
tumor specific responding	18		tumor specific responding	27		normal specific responding	22		no responding	23		consistent responding	3		divergent responding	31
tumor specific responding	16		tumor specific responding	27		normal specific responding	22		no responding	21		consistent responding	2		divergent responding	31
tumor specific responding	5		tumor specific responding	26		normal specific responding	22		no responding	20		consistent responding	2		divergent responding	30
tumor specific responding	26		tumor specific responding	26		normal specific responding	19		no responding	20		consistent responding	2		divergent responding	28
tumor specific responding	19		tumor specific responding	24		normal specific responding	18		no responding	18		consistent responding	2		divergent responding	27
tumor specific responding	33		tumor specific responding	23		normal specific responding	15		no responding	17		consistent responding	2		divergent responding	26
tumor specific responding	19		tumor specific responding	23		normal specific responding	15		no responding	17		consistent responding	2		divergent responding	25
tumor specific responding	27		tumor specific responding	23		normal specific responding	14		no responding	16		consistent responding	2		divergent responding	24
tumor specific responding	7		tumor specific responding	23		normal specific responding	12		no responding	16		consistent responding	1		divergent responding	23
tumor specific responding	6		tumor specific responding	23		normal specific responding	12		no responding	15		consistent responding	1		divergent responding	22
tumor specific responding	27		tumor specific responding	22		normal specific responding	12		no responding	15		consistent responding	0		divergent responding	22
tumor specific responding	27		tumor specific responding	21		normal specific responding	12		no responding	15		consistent responding	0		divergent responding	21
tumor specific responding	17		tumor specific responding	21		normal specific responding	12		no responding	15		consistent responding	0		divergent responding	21
tumor specific responding	23		tumor specific responding	21		normal specific responding	11		no responding	14		consistent responding	0		divergent responding	21
tumor specific responding	23		tumor specific responding	19		normal specific responding	11		no responding	14		consistent responding	0		divergent responding	20
tumor specific responding	12		tumor specific responding	19		normal specific responding	10		no responding	13		consistent responding	0		divergent responding	20
tumor specific responding	10		tumor specific responding	19		normal specific responding	10		no responding	13		consistent responding	0		divergent responding	19
tumor specific responding	14		tumor specific responding	18		normal specific responding	10		no responding	13					divergent responding	19
tumor specific responding	8		tumor specific responding	18		normal specific responding	10		no responding	12					divergent responding	19
tumor specific responding	2		tumor specific responding	18		normal specific responding	9		no responding	12					divergent responding	18
tumor specific responding	3		tumor specific responding	18		normal specific responding	9		no responding	12					divergent responding	17
tumor specific responding	15		tumor specific responding	17		normal specific responding	9		no responding	11					divergent responding	17
tumor specific responding	1		tumor specific responding	16		normal specific responding	9		no responding	11					divergent responding	16
tumor specific responding	16		tumor specific responding	16		normal specific responding	9		no responding	11					divergent responding	16
tumor specific responding	16		tumor specific responding	16		normal specific responding	9		no responding	11					divergent responding	15
tumor specific responding	3		tumor specific responding	16		normal specific responding	9		no responding	11					divergent responding	15
tumor specific responding	26		tumor specific responding	16		normal specific responding	9		no responding	10					divergent responding	15
tumor specific responding	16		tumor specific responding	15		normal specific responding	8		no responding	10					divergent responding	15
tumor specific responding	7		tumor specific responding	15		normal specific responding	8		no responding	10					divergent responding	15
tumor specific responding	1		tumor specific responding	14		normal specific responding	8		no responding	10					divergent responding	14
tumor specific responding	4		tumor specific responding	14		normal specific responding	8		no responding	10					divergent responding	14
tumor specific responding	4		tumor specific responding	14		normal specific responding	8		no responding	10					divergent responding	14
tumor specific responding	18		tumor specific responding	14		normal specific responding	8		no responding	9					divergent responding	14
tumor specific responding	5		tumor specific responding	14		normal specific responding	7		no responding	9					divergent responding	13
tumor specific responding	5		tumor specific responding	13		normal specific responding	7		no responding	9					divergent responding	12
tumor specific responding	11		tumor specific responding	13		normal specific responding	7		no responding	9					divergent responding	12
tumor specific responding	4		tumor specific responding	12		normal specific responding	7		no responding	9					divergent responding	12
tumor specific responding	1		tumor specific responding	12		normal specific responding	7		no responding	9					divergent responding	12
tumor specific responding	4		tumor specific responding	12		normal specific responding	7		no responding	9					divergent responding	11
tumor specific responding	9		tumor specific responding	11		normal specific responding	7		no responding	9					divergent responding	11
tumor specific responding	10		tumor specific responding	11		normal specific responding	6		no responding	9					divergent responding	11
tumor specific responding	18		tumor specific responding	11		normal specific responding	6		no responding	9					divergent responding	11
tumor specific responding	3		tumor specific responding	11		normal specific responding	6		no responding	9					divergent responding	11
tumor specific responding	2		tumor specific responding	11		normal specific responding	6		no responding	9					divergent responding	10
tumor specific responding	3		tumor specific responding	10		normal specific responding	6		no responding	9					divergent responding	10
tumor specific responding	4		tumor specific responding	10		normal specific responding	6		no responding	9					divergent responding	10
tumor specific responding	1		tumor specific responding	10		normal specific responding	6		no responding	8					divergent responding	10
tumor specific responding	1		tumor specific responding	10		normal specific responding	6		no responding	8					divergent responding	10
tumor specific responding	5		tumor specific responding	10		normal specific responding	6		no responding	8					divergent responding	10
tumor specific responding	4		tumor specific responding	10		normal specific responding	5		no responding	8					divergent responding	9
tumor specific responding	8		tumor specific responding	10		normal specific responding	5		no responding	8					divergent responding	9
tumor specific responding	4		tumor specific responding	9		normal specific responding	5		no responding	8					divergent responding	9
tumor specific responding	2		tumor specific responding	9		normal specific responding	5		no responding	8					divergent responding	9
tumor specific responding	4		tumor specific responding	9		normal specific responding	5		no responding	7					divergent responding	9
tumor specific responding	4		tumor specific responding	9		normal specific responding	5		no responding	7					divergent responding	9
tumor specific responding	8		tumor specific responding	9		normal specific responding	5		no responding	7					divergent responding	9
tumor specific responding	3		tumor specific responding	9		normal specific responding	5		no responding	7					divergent responding	9
tumor specific responding	14		tumor specific responding	9		normal specific responding	5		no responding	7					divergent responding	8
tumor specific responding	4		tumor specific responding	9		normal specific responding	5		no responding	7					divergent responding	8
tumor specific responding	0		tumor specific responding	9		normal specific responding	5		no responding	7					divergent responding	8
tumor specific responding	3		tumor specific responding	8		normal specific responding	4		no responding	7					divergent responding	8
tumor specific responding	14		tumor specific responding	8		normal specific responding	4		no responding	7					divergent responding	8
tumor specific responding	3		tumor specific responding	8		normal specific responding	4		no responding	7					divergent responding	8
tumor specific responding	8		tumor specific responding	8		normal specific responding	4		no responding	7					divergent responding	8
tumor specific responding	8		tumor specific responding	8		normal specific responding	4		no responding	7					divergent responding	8
tumor specific responding	3		tumor specific responding	8		normal specific responding	4		no responding	6					divergent responding	8
tumor specific responding	6		tumor specific responding	8		normal specific responding	4		no responding	6					divergent responding	8
tumor specific responding	0		tumor specific responding	8		normal specific responding	4		no responding	6					divergent responding	8
tumor specific responding	2		tumor specific responding	8		normal specific responding	4		no responding	6					divergent responding	7
tumor specific responding	2		tumor specific responding	8		normal specific responding	4		no responding	6					divergent responding	7
tumor specific responding	1		tumor specific responding	8		normal specific responding	4		no responding	6					divergent responding	7
tumor specific responding	7		tumor specific responding	8		normal specific responding	4		no responding	6					divergent responding	7
tumor specific responding	6		tumor specific responding	8		normal specific responding	4		no responding	6					divergent responding	7
tumor specific responding	5		tumor specific responding	8		normal specific responding	4		no responding	6					divergent responding	7
tumor specific responding	6		tumor specific responding	8		normal specific responding	3		no responding	6					divergent responding	7
tumor specific responding	0		tumor specific responding	8		normal specific responding	3		no responding	6					divergent responding	7
tumor specific responding	8		tumor specific responding	8		normal specific responding	3		no responding	6					divergent responding	7
tumor specific responding	3		tumor specific responding	8		normal specific responding	3		no responding	6					divergent responding	7
tumor specific responding	11		tumor specific responding	8		normal specific responding	3		no responding	5					divergent responding	6
tumor specific responding	3		tumor specific responding	8		normal specific responding	3		no responding	5					divergent responding	6
tumor specific responding	7		tumor specific responding	7		normal specific responding	3		no responding	5					divergent responding	6
tumor specific responding	6		tumor specific responding	7		normal specific responding	3		no responding	5					divergent responding	6
tumor specific responding	2		tumor specific responding	7		normal specific responding	3		no responding	5					divergent responding	6
tumor specific responding	2		tumor specific responding	7		normal specific responding	3		no responding	5					divergent responding	6
tumor specific responding	4		tumor specific responding	7		normal specific responding	3		no responding	5					divergent responding	6
tumor specific responding	2		tumor specific responding	7		normal specific responding	3		no responding	5					divergent responding	6
tumor specific responding	7		tumor specific responding	7		normal specific responding	3		no responding	5					divergent responding	6
tumor specific responding	6		tumor specific responding	7		normal specific responding	3		no responding	5					divergent responding	6
tumor specific responding	7		tumor specific responding	7		normal specific responding	3		no responding	5					divergent responding	6
tumor specific responding	14		tumor specific responding	7		normal specific responding	3		no responding	5					divergent responding	5
tumor specific responding	3		tumor specific responding	7		normal specific responding	3		no responding	5					divergent responding	5
tumor specific responding	2		tumor specific responding	7		normal specific responding	3		no responding	5					divergent responding	5
tumor specific responding	2		tumor specific responding	7		normal specific responding	3		no responding	5					divergent responding	5
tumor specific responding	3		tumor specific responding	7		normal specific responding	3		no responding	5					divergent responding	5
tumor specific responding	5		tumor specific responding	7		normal specific responding	3		no responding	5					divergent responding	5
tumor specific responding	9		tumor specific responding	7		normal specific responding	2		no responding	5					divergent responding	5
tumor specific responding	1		tumor specific responding	7		normal specific responding	2		no responding	5					divergent responding	5
tumor specific responding	0		tumor specific responding	6		normal specific responding	2		no responding	5					divergent responding	5
tumor specific responding	5		tumor specific responding	6		normal specific responding	2		no responding	5					divergent responding	5
tumor specific responding	1		tumor specific responding	6		normal specific responding	2		no responding	5					divergent responding	5
tumor specific responding	0		tumor specific responding	6		normal specific responding	2		no responding	4					divergent responding	5
tumor specific responding	1		tumor specific responding	6		normal specific responding	2		no responding	4					divergent responding	5
tumor specific responding	6		tumor specific responding	6		normal specific responding	2		no responding	4					divergent responding	5
tumor specific responding	5		tumor specific responding	6		normal specific responding	2		no responding	4					divergent responding	5
tumor specific responding	0		tumor specific responding	6		normal specific responding	2		no responding	4					divergent responding	5
tumor specific responding	0		tumor specific responding	6		normal specific responding	2		no responding	4					divergent responding	4
tumor specific responding	4		tumor specific responding	6		normal specific responding	2		no responding	4					divergent responding	4
tumor specific responding	0		tumor specific responding	6		normal specific responding	2		no responding	4					divergent responding	4
tumor specific responding	6		tumor specific responding	6		normal specific responding	2		no responding	4					divergent responding	4
tumor specific responding	1		tumor specific responding	6		normal specific responding	2		no responding	4					divergent responding	4
tumor specific responding	2		tumor specific responding	6		normal specific responding	2		no responding	4					divergent responding	4
tumor specific responding	3		tumor specific responding	6		normal specific responding	2		no responding	4					divergent responding	4
tumor specific responding	2		tumor specific responding	6		normal specific responding	2		no responding	4					divergent responding	4
tumor specific responding	2		tumor specific responding	5		normal specific responding	2		no responding	4					divergent responding	4
tumor specific responding	0		tumor specific responding	5		normal specific responding	2		no responding	4					divergent responding	4
tumor specific responding	7		tumor specific responding	5		normal specific responding	2		no responding	4					divergent responding	4
tumor specific responding	10		tumor specific responding	5		normal specific responding	2		no responding	4					divergent responding	4
tumor specific responding	6		tumor specific responding	5		normal specific responding	2		no responding	4					divergent responding	4
tumor specific responding	2		tumor specific responding	5		normal specific responding	2		no responding	4					divergent responding	4
tumor specific responding	7		tumor specific responding	5		normal specific responding	2		no responding	4					divergent responding	4
tumor specific responding	0		tumor specific responding	5		normal specific responding	2		no responding	4					divergent responding	4
tumor specific responding	2		tumor specific responding	5		normal specific responding	2		no responding	4					divergent responding	3
tumor specific responding	0		tumor specific responding	5		normal specific responding	2		no responding	4					divergent responding	3
tumor specific responding	0		tumor specific responding	5		normal specific responding	2		no responding	4					divergent responding	3
tumor specific responding	2		tumor specific responding	5		normal specific responding	1		no responding	4					divergent responding	3
tumor specific responding	0		tumor specific responding	5		normal specific responding	1		no responding	4					divergent responding	3
tumor specific responding	3		tumor specific responding	5		normal specific responding	1		no responding	4					divergent responding	3
tumor specific responding	10		tumor specific responding	5		normal specific responding	1		no responding	4					divergent responding	3
tumor specific responding	3		tumor specific responding	5		normal specific responding	1		no responding	4					divergent responding	3
tumor specific responding	2		tumor specific responding	5		normal specific responding	1		no responding	3					divergent responding	3
tumor specific responding	0		tumor specific responding	5		normal specific responding	1		no responding	3					divergent responding	3
tumor specific responding	1		tumor specific responding	5		normal specific responding	1		no responding	3					divergent responding	3
tumor specific responding	4		tumor specific responding	5		normal specific responding	1		no responding	3					divergent responding	3
tumor specific responding	4		tumor specific responding	5		normal specific responding	1		no responding	3					divergent responding	3
tumor specific responding	5		tumor specific responding	5		normal specific responding	1		no responding	3					divergent responding	3
tumor specific responding	3		tumor specific responding	5		normal specific responding	1		no responding	3					divergent responding	3
tumor specific responding	5		tumor specific responding	5		normal specific responding	1		no responding	3					divergent responding	3
tumor specific responding	6		tumor specific responding	4		normal specific responding	1		no responding	3					divergent responding	3
tumor specific responding	0		tumor specific responding	4		normal specific responding	1		no responding	3					divergent responding	3
tumor specific responding	2		tumor specific responding	4		normal specific responding	1		no responding	3					divergent responding	3
tumor specific responding	0		tumor specific responding	4		normal specific responding	1		no responding	3					divergent responding	3
tumor specific responding	0		tumor specific responding	4		normal specific responding	1		no responding	3					divergent responding	3
tumor specific responding	3		tumor specific responding	4		normal specific responding	1		no responding	3					divergent responding	3
tumor specific responding	3		tumor specific responding	4		normal specific responding	1		no responding	3					divergent responding	2
tumor specific responding	0		tumor specific responding	4		normal specific responding	1		no responding	3					divergent responding	2
tumor specific responding	0		tumor specific responding	4		normal specific responding	1		no responding	3					divergent responding	2
tumor specific responding	7		tumor specific responding	4		normal specific responding	1		no responding	3					divergent responding	2
tumor specific responding	2		tumor specific responding	4		normal specific responding	1		no responding	3					divergent responding	2
tumor specific responding	2		tumor specific responding	4		normal specific responding	1		no responding	3					divergent responding	2
tumor specific responding	1		tumor specific responding	4		normal specific responding	1		no responding	3					divergent responding	2
tumor specific responding	7		tumor specific responding	4		normal specific responding	1		no responding	3					divergent responding	2
tumor specific responding	0		tumor specific responding	4		normal specific responding	1		no responding	3					divergent responding	2
tumor specific responding	2		tumor specific responding	4		normal specific responding	1		no responding	3					divergent responding	2
tumor specific responding	0		tumor specific responding	4		normal specific responding	1		no responding	3					divergent responding	2
tumor specific responding	3		tumor specific responding	4		normal specific responding	1		no responding	3					divergent responding	2
tumor specific responding	2		tumor specific responding	4		normal specific responding	1		no responding	3					divergent responding	2
tumor specific responding	3		tumor specific responding	4		normal specific responding	1		no responding	3					divergent responding	2
tumor specific responding	1		tumor specific responding	4		normal specific responding	1		no responding	3					divergent responding	2
tumor specific responding	0		tumor specific responding	4		normal specific responding	1		no responding	3					divergent responding	2
tumor specific responding	0		tumor specific responding	4		normal specific responding	1		no responding	3					divergent responding	2
tumor specific responding	0		tumor specific responding	4		normal specific responding	1		no responding	3					divergent responding	2
tumor specific responding	1		tumor specific responding	4		normal specific responding	1		no responding	3					divergent responding	2
tumor specific responding	0		tumor specific responding	4		normal specific responding	1		no responding	3					divergent responding	2
tumor specific responding	1		tumor specific responding	4		normal specific responding	1		no responding	3					divergent responding	2
tumor specific responding	1		tumor specific responding	4		normal specific responding	0		no responding	3					divergent responding	2
tumor specific responding	2		tumor specific responding	4		normal specific responding	0		no responding	3					divergent responding	2
tumor specific responding	5		tumor specific responding	4		normal specific responding	0		no responding	3					divergent responding	2
tumor specific responding	2		tumor specific responding	3		normal specific responding	0		no responding	3					divergent responding	2
tumor specific responding	0		tumor specific responding	3		normal specific responding	0		no responding	3					divergent responding	2
tumor specific responding	5		tumor specific responding	3		normal specific responding	0		no responding	3					divergent responding	2
tumor specific responding	0		tumor specific responding	3		normal specific responding	0		no responding	3					divergent responding	2
tumor specific responding	0		tumor specific responding	3		normal specific responding	0		no responding	3					divergent responding	2
tumor specific responding	2		tumor specific responding	3		normal specific responding	0		no responding	2					divergent responding	2
tumor specific responding	3		tumor specific responding	3		normal specific responding	0		no responding	2					divergent responding	2
tumor specific responding	2		tumor specific responding	3		normal specific responding	0		no responding	2					divergent responding	1
tumor specific responding	2		tumor specific responding	3		normal specific responding	0		no responding	2					divergent responding	1
tumor specific responding	5		tumor specific responding	3		normal specific responding	0		no responding	2					divergent responding	1
tumor specific responding	0		tumor specific responding	3		normal specific responding	0		no responding	2					divergent responding	1
tumor specific responding	2		tumor specific responding	3		normal specific responding	0		no responding	2					divergent responding	1
tumor specific responding	0		tumor specific responding	3		normal specific responding	0		no responding	2					divergent responding	1
tumor specific responding	1		tumor specific responding	3		normal specific responding	0		no responding	2					divergent responding	1
tumor specific responding	1		tumor specific responding	3		normal specific responding	0		no responding	2					divergent responding	1
tumor specific responding	0		tumor specific responding	3		normal specific responding	0		no responding	2					divergent responding	1
tumor specific responding	0		tumor specific responding	3		normal specific responding	0		no responding	2					divergent responding	1
tumor specific responding	2		tumor specific responding	3		normal specific responding	0		no responding	2					divergent responding	1
tumor specific responding	3		tumor specific responding	3		normal specific responding	0		no responding	2					divergent responding	1
tumor specific responding	0		tumor specific responding	3		normal specific responding	0		no responding	2					divergent responding	1
tumor specific responding	1		tumor specific responding	3		normal specific responding	0		no responding	2					divergent responding	1
tumor specific responding	0		tumor specific responding	3		normal specific responding	0		no responding	2					divergent responding	1
tumor specific responding	0		tumor specific responding	3		normal specific responding	0		no responding	2					divergent responding	1
tumor specific responding	0		tumor specific responding	3		normal specific responding	0		no responding	2					divergent responding	1
tumor specific responding	1		tumor specific responding	3		normal specific responding	0		no responding	2					divergent responding	1
tumor specific responding	0		tumor specific responding	3		normal specific responding	0		no responding	2					divergent responding	1
tumor specific responding	1		tumor specific responding	3		normal specific responding	0		no responding	2					divergent responding	1
tumor specific responding	0		tumor specific responding	3		normal specific responding	0		no responding	2					divergent responding	1
tumor specific responding	4		tumor specific responding	3		normal specific responding	0		no responding	2					divergent responding	1
tumor specific responding	1		tumor specific responding	3		normal specific responding	0		no responding	2					divergent responding	1
tumor specific responding	0		tumor specific responding	3		normal specific responding	0		no responding	2					divergent responding	1
tumor specific responding	2		tumor specific responding	3		normal specific responding	0		no responding	2					divergent responding	1
tumor specific responding	4		tumor specific responding	3		normal specific responding	0		no responding	2					divergent responding	1
tumor specific responding	0		tumor specific responding	3		normal specific responding	0		no responding	2					divergent responding	1
tumor specific responding	0		tumor specific responding	3		normal specific responding	0		no responding	2					divergent responding	0
tumor specific responding	2		tumor specific responding	3		normal specific responding	0		no responding	2					divergent responding	0
tumor specific responding	2		tumor specific responding	3		normal specific responding	0		no responding	2					divergent responding	0
tumor specific responding	1		tumor specific responding	3		normal specific responding	0		no responding	2					divergent responding	0
tumor specific responding	3		tumor specific responding	2					no responding	2					divergent responding	0
tumor specific responding	0		tumor specific responding	2					no responding	2					divergent responding	0
tumor specific responding	0		tumor specific responding	2					no responding	2					divergent responding	0
tumor specific responding	2		tumor specific responding	2					no responding	2					divergent responding	0
tumor specific responding	0		tumor specific responding	2					no responding	2					divergent responding	0
tumor specific responding	0		tumor specific responding	2					no responding	2					divergent responding	0
tumor specific responding	0		tumor specific responding	2					no responding	2					divergent responding	0
tumor specific responding	2		tumor specific responding	2					no responding	2					divergent responding	0
tumor specific responding	1		tumor specific responding	2					no responding	2					divergent responding	0
tumor specific responding	2		tumor specific responding	2					no responding	2					divergent responding	0
tumor specific responding	1		tumor specific responding	2					no responding	2					divergent responding	0
tumor specific responding	1		tumor specific responding	2					no responding	1					divergent responding	0
tumor specific responding	0		tumor specific responding	2					no responding	1					divergent responding	0
tumor specific responding	1		tumor specific responding	2					no responding	1					divergent responding	0
tumor specific responding	1		tumor specific responding	2					no responding	1					divergent responding	0
tumor specific responding	2		tumor specific responding	2					no responding	1					divergent responding	0
tumor specific responding	3		tumor specific responding	2					no responding	1					divergent responding	0
tumor specific responding	4		tumor specific responding	2					no responding	1					divergent responding	0
tumor specific responding	2		tumor specific responding	2					no responding	1					divergent responding	0
tumor specific responding	1		tumor specific responding	2					no responding	1					divergent responding	0
tumor specific responding	0		tumor specific responding	2					no responding	1					divergent responding	0
tumor specific responding	0		tumor specific responding	2					no responding	1					divergent responding	0
tumor specific responding	0		tumor specific responding	2					no responding	1					divergent responding	0
tumor specific responding	1		tumor specific responding	2					no responding	1					divergent responding	0
tumor specific responding	2		tumor specific responding	2					no responding	1					divergent responding	0
tumor specific responding	0		tumor specific responding	2					no responding	1					divergent responding	0
tumor specific responding	0		tumor specific responding	2					no responding	1
tumor specific responding	0		tumor specific responding	2					no responding	1
tumor specific responding	1		tumor specific responding	2					no responding	1
tumor specific responding	1		tumor specific responding	2					no responding	1
tumor specific responding	1		tumor specific responding	2					no responding	1
tumor specific responding	0		tumor specific responding	2					no responding	1
tumor specific responding	2		tumor specific responding	2					no responding	1
tumor specific responding	1		tumor specific responding	2					no responding	1
tumor specific responding	0		tumor specific responding	2					no responding	1
tumor specific responding	0		tumor specific responding	2					no responding	1
tumor specific responding	0		tumor specific responding	2					no responding	1
tumor specific responding	2		tumor specific responding	2					no responding	1
tumor specific responding	23		tumor specific responding	2					no responding	1
tumor specific responding	16		tumor specific responding	2					no responding	1
tumor specific responding	7		tumor specific responding	2					no responding	1
tumor specific responding	18		tumor specific responding	2					no responding	1
tumor specific responding	14		tumor specific responding	2					no responding	1
tumor specific responding	8		tumor specific responding	2					no responding	1
tumor specific responding	3		tumor specific responding	2					no responding	1
tumor specific responding	0		tumor specific responding	2					no responding	1
tumor specific responding	9		tumor specific responding	2					no responding	1
tumor specific responding	10		tumor specific responding	2					no responding	1
tumor specific responding	32		tumor specific responding	2					no responding	1
tumor specific responding	21		tumor specific responding	2					no responding	1
tumor specific responding	13		tumor specific responding	2					no responding	1
tumor specific responding	13		tumor specific responding	2					no responding	1
tumor specific responding	12		tumor specific responding	2					no responding	1
tumor specific responding	12		tumor specific responding	2					no responding	1
tumor specific responding	21		tumor specific responding	1					no responding	1
tumor specific responding	21		tumor specific responding	1					no responding	1
tumor specific responding	0		tumor specific responding	1					no responding	1
tumor specific responding	1		tumor specific responding	1					no responding	1
tumor specific responding	0		tumor specific responding	1					no responding	1
tumor specific responding	6		tumor specific responding	1					no responding	1
tumor specific responding	2		tumor specific responding	1					no responding	1
tumor specific responding	23		tumor specific responding	1					no responding	1
tumor specific responding	1		tumor specific responding	1					no responding	1
tumor specific responding	0		tumor specific responding	1					no responding	1
tumor specific responding	3		tumor specific responding	1					no responding	1
tumor specific responding	8		tumor specific responding	1					no responding	1
tumor specific responding	0		tumor specific responding	1					no responding	1
tumor specific responding	2		tumor specific responding	1					no responding	1
tumor specific responding	1		tumor specific responding	1					no responding	1
tumor specific responding	3		tumor specific responding	1					no responding	1
tumor specific responding	5		tumor specific responding	1					no responding	1
tumor specific responding	2		tumor specific responding	1					no responding	1
tumor specific responding	3		tumor specific responding	1					no responding	1
tumor specific responding	0		tumor specific responding	1					no responding	1
tumor specific responding	0		tumor specific responding	1					no responding	1
tumor specific responding	0		tumor specific responding	1					no responding	1
tumor specific responding	1		tumor specific responding	1					no responding	1
tumor specific responding	0		tumor specific responding	1					no responding	1
tumor specific responding	0		tumor specific responding	1					no responding	1
tumor specific responding	0		tumor specific responding	1					no responding	1
tumor specific responding	0		tumor specific responding	1					no responding	1
tumor specific responding	2		tumor specific responding	1					no responding	1
tumor specific responding	0		tumor specific responding	1					no responding	1
tumor specific responding	1		tumor specific responding	1					no responding	1
tumor specific responding	0		tumor specific responding	1					no responding	1
tumor specific responding	0		tumor specific responding	1					no responding	1
tumor specific responding	1		tumor specific responding	1					no responding	1
tumor specific responding	0		tumor specific responding	1					no responding	1
tumor specific responding	9		tumor specific responding	1					no responding	0
tumor specific responding	8		tumor specific responding	1					no responding	0
tumor specific responding	11		tumor specific responding	1					no responding	0
tumor specific responding	7		tumor specific responding	1					no responding	0
tumor specific responding	8		tumor specific responding	1					no responding	0
tumor specific responding	8		tumor specific responding	1					no responding	0
tumor specific responding	11		tumor specific responding	1					no responding	0
tumor specific responding	3		tumor specific responding	1					no responding	0
tumor specific responding	4		tumor specific responding	1					no responding	0
tumor specific responding	5		tumor specific responding	1					no responding	0
tumor specific responding	3		tumor specific responding	1					no responding	0
tumor specific responding	8		tumor specific responding	1					no responding	0
tumor specific responding	8		tumor specific responding	1					no responding	0
tumor specific responding	9		tumor specific responding	1					no responding	0
tumor specific responding	2		tumor specific responding	1					no responding	0
tumor specific responding	10		tumor specific responding	0					no responding	0
tumor specific responding	1		tumor specific responding	0					no responding	0
tumor specific responding	3		tumor specific responding	0					no responding	0
tumor specific responding	3		tumor specific responding	0					no responding	0
tumor specific responding	9		tumor specific responding	0					no responding	0
tumor specific responding	1		tumor specific responding	0					no responding	0
tumor specific responding	7		tumor specific responding	0					no responding	0
tumor specific responding	8		tumor specific responding	0					no responding	0
tumor specific responding	8		tumor specific responding	0					no responding	0
tumor specific responding	5		tumor specific responding	0					no responding	0
tumor specific responding	6		tumor specific responding	0					no responding	0
tumor specific responding	5		tumor specific responding	0					no responding	0
tumor specific responding	11		tumor specific responding	0					no responding	0
tumor specific responding	4		tumor specific responding	0					no responding	0
tumor specific responding	7		tumor specific responding	0					no responding	0
tumor specific responding	2		tumor specific responding	0					no responding	0
tumor specific responding	5		tumor specific responding	0					no responding	0
tumor specific responding	9		tumor specific responding	0					no responding	0
tumor specific responding	5		tumor specific responding	0					no responding	0
tumor specific responding	9		tumor specific responding	0					no responding	0
tumor specific responding	10		tumor specific responding	0					no responding	0
tumor specific responding	7		tumor specific responding	0					no responding	0
tumor specific responding	5		tumor specific responding	0					no responding	0
tumor specific responding	1		tumor specific responding	0					no responding	0
tumor specific responding	7		tumor specific responding	0					no responding	0
tumor specific responding	6		tumor specific responding	0					no responding	0
tumor specific responding	2		tumor specific responding	0					no responding	0
tumor specific responding	2		tumor specific responding	0					no responding	0
tumor specific responding	5		tumor specific responding	0					no responding	0
tumor specific responding	2		tumor specific responding	0					no responding	0
tumor specific responding	9		tumor specific responding	0					no responding	0
tumor specific responding	6		tumor specific responding	0					no responding	0
tumor specific responding	4		tumor specific responding	0					no responding	0
tumor specific responding	4		tumor specific responding	0					no responding	0
tumor specific responding	6		tumor specific responding	0					no responding	0
tumor specific responding	2		tumor specific responding	0					no responding	0
tumor specific responding	0		tumor specific responding	0					no responding	0
tumor specific responding	7		tumor specific responding	0					no responding	0
tumor specific responding	3		tumor specific responding	0					no responding	0
tumor specific responding	2		tumor specific responding	0					no responding	0
tumor specific responding	4		tumor specific responding	0					no responding	0
tumor specific responding	1		tumor specific responding	0					no responding	0
tumor specific responding	4		tumor specific responding	0					no responding	0
tumor specific responding	5		tumor specific responding	0					no responding	0
tumor specific responding	49		tumor specific responding	0					no responding	0
tumor specific responding	35		tumor specific responding	0					no responding	0
tumor specific responding	35		tumor specific responding	0					no responding	0
tumor specific responding	1		tumor specific responding	0					no responding	0
tumor specific responding	8		tumor specific responding	0					no responding	0
tumor specific responding	33		tumor specific responding	0					no responding	0
tumor specific responding	8		tumor specific responding	0					no responding	0
tumor specific responding	8		tumor specific responding	0					no responding	0
tumor specific responding	8		tumor specific responding	0					no responding	0
tumor specific responding	8		tumor specific responding	0					no responding	0
tumor specific responding	29		tumor specific responding	0					no responding	0
tumor specific responding	3		tumor specific responding	0					no responding	0
tumor specific responding	23		tumor specific responding	0					no responding	0
tumor specific responding	0		tumor specific responding	0					no responding	0
tumor specific responding	0		tumor specific responding	0					no responding	0
tumor specific responding	3		tumor specific responding	0					no responding	0
tumor specific responding	3		tumor specific responding	0					no responding	0
tumor specific responding	1		tumor specific responding	0					no responding	0
tumor specific responding	1		tumor specific responding	0					no responding	0
tumor specific responding	0		tumor specific responding	0					no responding	0
tumor specific responding	0		tumor specific responding	0					no responding	0
tumor specific responding	4		tumor specific responding	0					no responding	0
tumor specific responding	0		tumor specific responding	0					no responding	0
tumor specific responding	0		tumor specific responding	0					no responding	0
tumor specific responding	2		tumor specific responding	0					no responding	0
tumor specific responding	0		tumor specific responding	0					no responding	0
tumor specific responding	4		tumor specific responding	0					no responding	0
tumor specific responding	0		tumor specific responding	0					no responding	0
tumor specific responding	1		tumor specific responding	0					no responding	0
tumor specific responding	0		tumor specific responding	0					no responding	0
tumor specific responding	15		tumor specific responding	0					no responding	0
tumor specific responding	5		tumor specific responding	0					no responding	0
tumor specific responding	5		tumor specific responding	0					no responding	0
tumor specific responding	4		tumor specific responding	0					no responding	0
tumor specific responding	4		tumor specific responding	0					no responding	0
tumor specific responding	4		tumor specific responding	0					no responding	0
tumor specific responding	2		tumor specific responding	0					no responding	0
tumor specific responding	2		tumor specific responding	0					no responding	0
tumor specific responding	1		tumor specific responding	0					no responding	0
tumor specific responding	0		tumor specific responding	0					no responding	0
tumor specific responding	4								no responding	0
normal specific responding	46								no responding	0
normal specific responding	28								no responding	0
normal specific responding	9								no responding	0
normal specific responding	11								no responding	0
normal specific responding	9								no responding	0
normal specific responding	9								no responding	0
normal specific responding	12								no responding	0
normal specific responding	4								no responding	0
normal specific responding	22								no responding	0
normal specific responding	12								no responding	0
normal specific responding	4								no responding	0
normal specific responding	1								no responding	0
normal specific responding	8								no responding	0
normal specific responding	5								no responding	0
normal specific responding	15								no responding	0
normal specific responding	15								no responding	0
normal specific responding	8								no responding	0
normal specific responding	14								no responding	0
normal specific responding	9								no responding	0
normal specific responding	0								no responding	0
normal specific responding	0								no responding	0
normal specific responding	6								no responding	0
normal specific responding	5								no responding	0
normal specific responding	9								no responding	0
normal specific responding	6
normal specific responding	7
normal specific responding	1
normal specific responding	2
normal specific responding	11
normal specific responding	0
normal specific responding	1
normal specific responding	10
normal specific responding	3
normal specific responding	2
normal specific responding	1
normal specific responding	8
normal specific responding	1
normal specific responding	0
normal specific responding	8
normal specific responding	5
normal specific responding	3
normal specific responding	3
normal specific responding	2
normal specific responding	2
normal specific responding	7
normal specific responding	1
normal specific responding	0
normal specific responding	3
normal specific responding	10
normal specific responding	1
normal specific responding	6
normal specific responding	7
normal specific responding	2
normal specific responding	2
normal specific responding	0
normal specific responding	2
normal specific responding	1
normal specific responding	3
normal specific responding	5
normal specific responding	3
normal specific responding	9
normal specific responding	0
normal specific responding	2
normal specific responding	6
normal specific responding	1
normal specific responding	5
normal specific responding	6
normal specific responding	2
normal specific responding	3
normal specific responding	0
normal specific responding	5
normal specific responding	4
normal specific responding	3
normal specific responding	2
normal specific responding	7
normal specific responding	3
normal specific responding	1
normal specific responding	10
normal specific responding	0
normal specific responding	1
normal specific responding	1
normal specific responding	4
normal specific responding	1
normal specific responding	1
normal specific responding	0
normal specific responding	2
normal specific responding	5
normal specific responding	0
normal specific responding	0
normal specific responding	1
normal specific responding	6
normal specific responding	2
normal specific responding	3
normal specific responding	2
normal specific responding	5
normal specific responding	1
normal specific responding	0
normal specific responding	0
normal specific responding	0
normal specific responding	0
normal specific responding	2
normal specific responding	0
normal specific responding	6
normal specific responding	2
normal specific responding	0
normal specific responding	0
normal specific responding	1
normal specific responding	3
normal specific responding	0
normal specific responding	0
normal specific responding	2
normal specific responding	0
normal specific responding	6
normal specific responding	3
normal specific responding	2
normal specific responding	3
normal specific responding	3
normal specific responding	0
normal specific responding	2
normal specific responding	2
normal specific responding	0
normal specific responding	0
normal specific responding	1
normal specific responding	4
normal specific responding	4
normal specific responding	0
normal specific responding	8
normal specific responding	1
normal specific responding	2
normal specific responding	4
normal specific responding	0
normal specific responding	1
normal specific responding	3
normal specific responding	4
normal specific responding	1
normal specific responding	0
normal specific responding	1
normal specific responding	1
normal specific responding	0
normal specific responding	1
normal specific responding	2
normal specific responding	1
normal specific responding	0
normal specific responding	0
normal specific responding	4
normal specific responding	0
normal specific responding	1
normal specific responding	2
normal specific responding	1
normal specific responding	1
normal specific responding	1
normal specific responding	2
normal specific responding	1
normal specific responding	1
normal specific responding	0
normal specific responding	1
normal specific responding	0
normal specific responding	1
normal specific responding	0
normal specific responding	0
normal specific responding	3
normal specific responding	1
normal specific responding	2
normal specific responding	3
normal specific responding	3
normal specific responding	12
normal specific responding	9
normal specific responding	4
normal specific responding	4
normal specific responding	8
normal specific responding	3
normal specific responding	10
normal specific responding	7
normal specific responding	4
normal specific responding	22
normal specific responding	2
normal specific responding	5
normal specific responding	2
normal specific responding	0
normal specific responding	1
normal specific responding	5
normal specific responding	1
normal specific responding	1
normal specific responding	2
normal specific responding	1
normal specific responding	0
normal specific responding	0
normal specific responding	3
normal specific responding	6
normal specific responding	9
normal specific responding	7
normal specific responding	1
normal specific responding	0
normal specific responding	4
normal specific responding	39
normal specific responding	5
normal specific responding	23
normal specific responding	28
normal specific responding	22
normal specific responding	24
normal specific responding	7
normal specific responding	12
normal specific responding	12
normal specific responding	3
normal specific responding	2
normal specific responding	1
normal specific responding	76
normal specific responding	28
normal specific responding	25
normal specific responding	2
normal specific responding	4
normal specific responding	19
normal specific responding	0
normal specific responding	18
no responding	38
no responding	39
no responding	24
no responding	13
no responding	23
no responding	33
no responding	33
no responding	30
no responding	10
no responding	3
no responding	3
no responding	13
no responding	24
no responding	1
no responding	16
no responding	20
no responding	17
no responding	9
no responding	3
no responding	0
no responding	15
no responding	15
no responding	17
no responding	4
no responding	15
no responding	1
no responding	1
no responding	14
no responding	12
no responding	12
no responding	14
no responding	10
no responding	18
no responding	1
no responding	9
no responding	11
no responding	5
no responding	1
no responding	15
no responding	7
no responding	11
no responding	4
no responding	2
no responding	5
no responding	3
no responding	1
no responding	7
no responding	3
no responding	10
no responding	2
no responding	1
no responding	10
no responding	5
no responding	2
no responding	9
no responding	6
no responding	0
no responding	1
no responding	10
no responding	4
no responding	1
no responding	10
no responding	9
no responding	6
no responding	8
no responding	3
no responding	0
no responding	4
no responding	0
no responding	8
no responding	1
no responding	2
no responding	4
no responding	6
no responding	0
no responding	2
no responding	4
no responding	1
no responding	3
no responding	7
no responding	2
no responding	9
no responding	5
no responding	0
no responding	7
no responding	5
no responding	1
no responding	5
no responding	5
no responding	9
no responding	3
no responding	0
no responding	7
no responding	7
no responding	4
no responding	2
no responding	0
no responding	6
no responding	0
no responding	5
no responding	1
no responding	5
no responding	2
no responding	7
no responding	3
no responding	9
no responding	6
no responding	1
no responding	7
no responding	7
no responding	0
no responding	9
no responding	0
no responding	9
no responding	3
no responding	0
no responding	5
no responding	3
no responding	2
no responding	1
no responding	0
no responding	0
no responding	2
no responding	4
no responding	6
no responding	0
no responding	1
no responding	0
no responding	0
no responding	1
no responding	9
no responding	7
no responding	0
no responding	1
no responding	0
no responding	3
no responding	1
no responding	11
no responding	5
no responding	0
no responding	1
no responding	3
no responding	0
no responding	0
no responding	0
no responding	1
no responding	3
no responding	1
no responding	4
no responding	1
no responding	1
no responding	7
no responding	0
no responding	1
no responding	6
no responding	5
no responding	0
no responding	0
no responding	0
no responding	5
no responding	4
no responding	0
no responding	0
no responding	1
no responding	2
no responding	2
no responding	2
no responding	0
no responding	0
no responding	3
no responding	0
no responding	0
no responding	1
no responding	0
no responding	6
no responding	1
no responding	2
no responding	3
no responding	0
no responding	0
no responding	1
no responding	0
no responding	0
no responding	0
no responding	1
no responding	2
no responding	5
no responding	2
no responding	0
no responding	1
no responding	0
no responding	3
no responding	0
no responding	3
no responding	1
no responding	0
no responding	4
no responding	4
no responding	5
no responding	4
no responding	3
no responding	2
no responding	3
no responding	6
no responding	3
no responding	1
no responding	1
no responding	1
no responding	2
no responding	4
no responding	0
no responding	3
no responding	0
no responding	1
no responding	1
no responding	4
no responding	2
no responding	2
no responding	4
no responding	0
no responding	1
no responding	4
no responding	4
no responding	3
no responding	0
no responding	3
no responding	3
no responding	3
no responding	1
no responding	0
no responding	0
no responding	0
no responding	2
no responding	1
no responding	0
no responding	2
no responding	2
no responding	1
no responding	3
no responding	1
no responding	2
no responding	0
no responding	3
no responding	0
no responding	4
no responding	0
no responding	6
no responding	0
no responding	5
no responding	0
no responding	4
no responding	0
no responding	0
no responding	1
no responding	3
no responding	3
no responding	1
no responding	0
no responding	1
no responding	0
no responding	0
no responding	0
no responding	0
no responding	0
no responding	5
no responding	1
no responding	2
no responding	1
no responding	0
no responding	2
no responding	5
no responding	2
no responding	2
no responding	1
no responding	0
no responding	0
no responding	3
no responding	0
no responding	0
no responding	2
no responding	1
no responding	0
no responding	0
no responding	0
no responding	1
no responding	0
no responding	0
no responding	0
no responding	0
no responding	2
no responding	1
no responding	1
no responding	1
no responding	0
no responding	0
no responding	0
no responding	2
no responding	3
no responding	0
no responding	1
no responding	2
no responding	1
no responding	3
no responding	0
no responding	1
no responding	1
no responding	0
no responding	1
no responding	1
no responding	1
no responding	1
no responding	0
no responding	0
no responding	0
no responding	0
no responding	1
no responding	0
no responding	1
no responding	1
no responding	1
no responding	3
no responding	0
no responding	0
no responding	1
no responding	0
no responding	1
no responding	3
no responding	0
no responding	2
no responding	0
no responding	0
no responding	0
no responding	1
no responding	1
no responding	1
no responding	0
no responding	0
no responding	0
no responding	2
no responding	0
no responding	0
no responding	0
no responding	3
no responding	0
no responding	0
no responding	0
no responding	0
no responding	11
no responding	5
no responding	16
no responding	2
no responding	3
no responding	26
no responding	27
no responding	2
no responding	11
no responding	20
no responding	0
no responding	0
no responding	4
no responding	2
no responding	7
no responding	4
no responding	1
no responding	3
no responding	0
no responding	0
no responding	1
no responding	0
no responding	6
no responding	21
no responding	0
no responding	0
no responding	0
no responding	0
no responding	0
no responding	0
no responding	0
no responding	0
no responding	0
no responding	0
no responding	0
no responding	0
no responding	13
no responding	3
no responding	12
no responding	2
no responding	4
no responding	3
no responding	8
no responding	9
no responding	6
no responding	6
no responding	0
no responding	2
no responding	9
no responding	0
no responding	0
no responding	9
no responding	4
no responding	5
no responding	3
no responding	8
no responding	3
no responding	4
no responding	4
no responding	4
no responding	4
no responding	1
no responding	2
no responding	5
no responding	3
no responding	1
no responding	8
no responding	5
no responding	1
no responding	2
no responding	1
no responding	8
no responding	9
no responding	2
no responding	8
no responding	1
no responding	2
no responding	4
no responding	2
divergent responding	10
divergent responding	37
divergent responding	17
divergent responding	4
divergent responding	55
divergent responding	52
divergent responding	52
divergent responding	38
divergent responding	38
divergent responding	16
divergent responding	3
divergent responding	28
divergent responding	15
divergent responding	21
divergent responding	35
divergent responding	6
divergent responding	44
divergent responding	14
divergent responding	12
divergent responding	30
divergent responding	24
divergent responding	15
divergent responding	34
divergent responding	7
divergent responding	31
divergent responding	26
divergent responding	1
divergent responding	4
divergent responding	15
divergent responding	7
divergent responding	16
divergent responding	9
divergent responding	9
divergent responding	8
divergent responding	25
divergent responding	9
divergent responding	14
divergent responding	8
divergent responding	8
divergent responding	31
divergent responding	22
divergent responding	20
divergent responding	2
divergent responding	4
divergent responding	14
divergent responding	3
divergent responding	9
divergent responding	19
divergent responding	19
divergent responding	11
divergent responding	8
divergent responding	4
divergent responding	8
divergent responding	3
divergent responding	8
divergent responding	9
divergent responding	10
divergent responding	4
divergent responding	14
divergent responding	10
divergent responding	8
divergent responding	8
divergent responding	0
divergent responding	5
divergent responding	6
divergent responding	12
divergent responding	5
divergent responding	9
divergent responding	2
divergent responding	5
divergent responding	9
divergent responding	3
divergent responding	11
divergent responding	2
divergent responding	5
divergent responding	6
divergent responding	3
divergent responding	6
divergent responding	13
divergent responding	5
divergent responding	4
divergent responding	5
divergent responding	5
divergent responding	2
divergent responding	5
divergent responding	2
divergent responding	2
divergent responding	2
divergent responding	7
divergent responding	3
divergent responding	4
divergent responding	5
divergent responding	5
divergent responding	2
divergent responding	4
divergent responding	7
divergent responding	3
divergent responding	0
divergent responding	3
divergent responding	2
divergent responding	12
divergent responding	3
divergent responding	6
divergent responding	10
divergent responding	3
divergent responding	7
divergent responding	2
divergent responding	0
divergent responding	8
divergent responding	2
divergent responding	3
divergent responding	1
divergent responding	8
divergent responding	0
divergent responding	0
divergent responding	0
divergent responding	0
divergent responding	2
divergent responding	2
divergent responding	6
divergent responding	4
divergent responding	4
divergent responding	3
divergent responding	1
divergent responding	0
divergent responding	2
divergent responding	0
divergent responding	3
divergent responding	4
divergent responding	1
divergent responding	4
divergent responding	6
divergent responding	2
divergent responding	1
divergent responding	3
divergent responding	2
divergent responding	1
divergent responding	1
divergent responding	5
divergent responding	4
divergent responding	1
divergent responding	1
divergent responding	0
divergent responding	2
divergent responding	3
divergent responding	2
divergent responding	0
divergent responding	1
divergent responding	2
divergent responding	2
divergent responding	2
divergent responding	0
divergent responding	2
divergent responding	0
divergent responding	2
divergent responding	4
divergent responding	7
divergent responding	0
divergent responding	1
divergent responding	2
divergent responding	0
divergent responding	0
divergent responding	2
divergent responding	1
divergent responding	3
divergent responding	0
divergent responding	1
divergent responding	1
divergent responding	0
divergent responding	1
divergent responding	0
divergent responding	18
divergent responding	20
divergent responding	27
divergent responding	15
divergent responding	11
divergent responding	21
divergent responding	19
divergent responding	21
divergent responding	17
divergent responding	12
divergent responding	3
divergent responding	11
divergent responding	2
divergent responding	3
divergent responding	2
divergent responding	3
divergent responding	3
divergent responding	7
divergent responding	15
divergent responding	23
divergent responding	0
divergent responding	1
divergent responding	0
divergent responding	22
divergent responding	7
divergent responding	1
divergent responding	2
divergent responding	0
divergent responding	0
divergent responding	1
divergent responding	5
divergent responding	0
divergent responding	1
divergent responding	2
divergent responding	2
divergent responding	1
divergent responding	1
divergent responding	1
divergent responding	0
divergent responding	1
divergent responding	0
divergent responding	0
divergent responding	6
divergent responding	0
divergent responding	0
divergent responding	1
divergent responding	6
divergent responding	9
divergent responding	6
divergent responding	4
divergent responding	5
divergent responding	10
divergent responding	0
divergent responding	6
divergent responding	11
divergent responding	3
divergent responding	1
divergent responding	7
divergent responding	3
divergent responding	5
divergent responding	2
divergent responding	8
divergent responding	4
divergent responding	7
divergent responding	10
divergent responding	5
divergent responding	1
divergent responding	5
divergent responding	1
consistent responding	2
consistent responding	10
consistent responding	4
consistent responding	5
consistent responding	2
consistent responding	4
consistent responding	4
consistent responding	2
consistent responding	7
consistent responding	0
consistent responding	0
consistent responding	2
consistent responding	2
consistent responding	0
consistent responding	0
consistent responding	0
consistent responding	3
consistent responding	1
consistent responding	0
consistent responding	2
consistent responding	3
consistent responding	5
consistent responding	2
consistent responding	0
consistent responding	3
consistent responding	1
