# Supplementary material for: Systematic Analysis of Time-Series Gene Expression Data on Tumor Cell-Selective Apoptotic Responses to HDAC Inhibitors
Source: Comput Math Methods Med. 2014 Oct 13;2014:867289. doi: 10.1155/2014/867289 (PMC4211306; doi:10.1155/2014/867289)
Supplement: Supplementary file 1 — Table S1. H-score of all pathways for tumor and normal samples: This table lists the name, category, website and H-score values for all 1307 pathway. Table S2. Illustrative pathways belonging to term "No responding": This table lists the name, category, website and TVPC patterns for "No responding" pathways. Table S3. Illustrative pathways belonging to term "Consistent responding": This table lists the name, category, website and TVPC patterns for "Consistent responding" pathways. Table S4. Illustrative pathways belonging to term "Tumor specific responding": This table lists the name, category, website and TVPC patterns for "Tumor specific responding" pathways. Table S5. Illustrative pathways belonging to term "Normal specific responding": This table lists the name, category, web site and TVPC patterns for "Normal specific responding" pathways. Table S6. Illustrative pathways belonging to term "Divergent responding": This table lists the name, category, website and TVPC patterns for "Divergent responding" pathways. Table S7. Genes within profile #0 for normal samples: This table contains all genes within profile #0 for normal samples, and lists the normalized expression data to the right of gene symbol. Table S8. Genes within profile #2 for normal samples: This table contains all genes within profile #2 for normal samples, and lists the normalized expression data to the right of gene symbol. Table S9. Genes within profile #9 for normal samples: This table contains all genes within profile #9 for normal samples, and lists the normalized expression data to the right of gene symbol. Table S10. Genes within profile #12 for normal samples: This table contains all genes within profile # 12 for normal samples, and lists the normalized expression data to the right of gene symbol. Table S11. Genes within profile #14 for normal samples: This table contains all genes within profile #14 for normal samples, and lists the normalized expression data to the right of gene symbol. Ta [file 867289.f1.zip › 867289.f1/Table S5.xls]

## Sheet: Sheet1
Pathway name	Categories	NO.all	NO.in	Web site	Pattern-tumor	Pattern-normal	Term	OMIC gene counts
KEGG FOCAL ADHESION	Cellular Processes	201	188	http://www.broadinstitute.org/gsea/msigdb/cards/KEGG_FOCAL_ADHESION	1111	0111	normal specific responding	25
KEGG LYSOSOME	Cellular Processes	121	115	http://www.broadinstitute.org/gsea/msigdb/cards/KEGG_LYSOSOME	1111	0111	normal specific responding	2
KEGG PROTEASOME	Genetic Information Processing	48	42	http://www.broadinstitute.org/gsea/msigdb/cards/KEGG_PROTEASOME	1111	0111	normal specific responding	0
GO NUCLEAR EXPORT	Biological process	33	29	http://www.broadinstitute.org/gsea/msigdb/cards/NUCLEAR_EXPORT	1111	1101	normal specific responding	3
KEGG PATHWAYS IN CANCER	Human Diseases	328	315	http://www.broadinstitute.org/gsea/msigdb/cards/KEGG_PATHWAYS_IN_CANCER	1111	1100	normal specific responding	76
KEGG B CELL RECEPTOR SIGNALING PATHWAY	Organismal Systems	75	71	http://www.broadinstitute.org/gsea/msigdb/cards/KEGG_B_CELL_RECEPTOR_SIGNALING_PATHWAY	1111	1100	normal specific responding	19
KEGG SYSTEMIC LUPUS ERYTHEMATOSUS	Human Diseases	140	107	http://www.broadinstitute.org/gsea/msigdb/cards/KEGG_SYSTEMIC_LUPUS_ERYTHEMATOSUS	1111	1011	normal specific responding	4
GO RNA EXPORT FROM NUCLEUS	Biological process	20	18	http://www.broadinstitute.org/gsea/msigdb/cards/RNA_EXPORT_FROM_NUCLEUS	1111	1001	normal specific responding	1
GO POST TRANSLATIONAL PROTEIN MODIFICATION	Biological process	476	439	http://www.broadinstitute.org/gsea/msigdb/cards/POST_TRANSLATIONAL_PROTEIN_MODIFICATION	1111	1000	normal specific responding	39
KEGG MAPK SIGNALING PATHWAY	Environmental Information Processing	267	256	http://www.broadinstitute.org/gsea/msigdb/cards/KEGG_MAPK_SIGNALING_PATHWAY	1111	1000	normal specific responding	28
GO PHOSPHOTRANSFERASE ACTIVITY ALCOHOL GROUP AS ACCEPTOR	Molecular function	334	313	http://www.broadinstitute.org/gsea/msigdb/cards/PHOSPHOTRANSFERASE_ACTIVITY_ALCOHOL_GROUP_AS_ACCEPTOR	1111	0110	normal specific responding	23
GO PROTEIN KINASE ACTIVITY	Molecular function	285	270	http://www.broadinstitute.org/gsea/msigdb/cards/PROTEIN_KINASE_ACTIVITY	1111	0110	normal specific responding	22
GO NUCLEAR TRANSPORT	Biological process	88	77	http://www.broadinstitute.org/gsea/msigdb/cards/NUCLEAR_TRANSPORT	1111	0101	normal specific responding	12
GO NUCLEOCYTOPLASMIC TRANSPORT	Biological process	87	76	http://www.broadinstitute.org/gsea/msigdb/cards/NUCLEOCYTOPLASMIC_TRANSPORT	1111	0101	normal specific responding	12
GO CELL CELL SIGNALING	Biological process	404	388	http://www.broadinstitute.org/gsea/msigdb/cards/CELL_CELL_SIGNALING	1111	0100	normal specific responding	5
GO PHOSPHORYLATION	Biological process	313	282	http://www.broadinstitute.org/gsea/msigdb/cards/PHOSPHORYLATION	1111	0100	normal specific responding	28
GO PROTEIN AMINO ACID PHOSPHORYLATION	Biological process	279	253	http://www.broadinstitute.org/gsea/msigdb/cards/PROTEIN_AMINO_ACID_PHOSPHORYLATION	1111	0100	normal specific responding	24
GO PROTEIN SERINE THREONINE KINASE ACTIVITY	Molecular function	205	196	http://www.broadinstitute.org/gsea/msigdb/cards/PROTEIN_SERINE_THREONINE_KINASE_ACTIVITY	1111	0010	normal specific responding	7
KEGG BLADDER CANCER	Human Diseases	42	40	http://www.broadinstitute.org/gsea/msigdb/cards/KEGG_BLADDER_CANCER	1111	0010	normal specific responding	18
GO NUCLEOBASENUCLEOSIDENUCLEOTIDE AND NUCLEIC ACID TRANSPORT	Biological process	31	28	http://www.broadinstitute.org/gsea/msigdb/cards/NUCLEOBASENUCLEOSIDENUCLEOTIDE_AND_NUCLEIC_ACID_TRANSPORT	1111	0001	normal specific responding	2
GO POSITIVE REGULATION OF TRANSCRIPTION FROM RNA POLYMERASE II PROMOTER	Biological process	65	57	http://www.broadinstitute.org/gsea/msigdb/cards/POSITIVE_REGULATION_OF_TRANSCRIPTION_FROM_RNA_POLYMERASE_II_PROMOTER	0000	0111	normal specific responding	8
GO COFACTOR METABOLIC PROCESS	Biological process	54	49	http://www.broadinstitute.org/gsea/msigdb/cards/COFACTOR_METABOLIC_PROCESS	0000	0111	normal specific responding	3
GO COENZYME METABOLIC PROCESS	Biological process	38	35	http://www.broadinstitute.org/gsea/msigdb/cards/COENZYME_METABOLIC_PROCESS	0000	0111	normal specific responding	3
GO NUCLEOBASENUCLEOSIDENUCLEOTIDE KINASE ACTIVITY	Molecular function	25	23	http://www.broadinstitute.org/gsea/msigdb/cards/NUCLEOBASENUCLEOSIDENUCLEOTIDE_KINASE_ACTIVITY	0000	0111	normal specific responding	0
GO PHOSPHOTRANSFERASE ACTIVITY PHOSPHATE GROUP AS ACCEPTOR	Molecular function	18	17	http://www.broadinstitute.org/gsea/msigdb/cards/PHOSPHOTRANSFERASE_ACTIVITY_PHOSPHATE_GROUP_AS_ACCEPTOR	0000	0111	normal specific responding	0
GO REGULATION OF CELL CYCLE	Biological process	182	167	http://www.broadinstitute.org/gsea/msigdb/cards/REGULATION_OF_CELL_CYCLE	0000	1110	normal specific responding	22
GO MUSCLE DEVELOPMENT	Biological process	93	89	http://www.broadinstitute.org/gsea/msigdb/cards/MUSCLE_DEVELOPMENT	0000	1110	normal specific responding	5
GO CHROMOSOMAL PART	Cellular component	96	88	http://www.broadinstitute.org/gsea/msigdb/cards/CHROMOSOMAL_PART	0000	1110	normal specific responding	9
GO NUCLEOTIDYLTRANSFERASE ACTIVITY	Molecular function	47	45	http://www.broadinstitute.org/gsea/msigdb/cards/NUCLEOTIDYLTRANSFERASE_ACTIVITY	0000	1110	normal specific responding	1
GO CELL CYCLE CHECKPOINT GO 0000075	Biological process	48	44	http://www.broadinstitute.org/gsea/msigdb/cards/CELL_CYCLE_CHECKPOINT_GO_0000075	0000	1110	normal specific responding	10
GO REGULATION OF MITOSIS	Biological process	41	39	http://www.broadinstitute.org/gsea/msigdb/cards/REGULATION_OF_MITOSIS	0000	1110	normal specific responding	3
GO CHROMATIN	Cellular component	35	34	http://www.broadinstitute.org/gsea/msigdb/cards/CHROMATIN	0000	1110	normal specific responding	5
GO CHROMOSOMEPERICENTRIC REGION	Cellular component	31	27	http://www.broadinstitute.org/gsea/msigdb/cards/CHROMOSOMEPERICENTRIC_REGION	0000	1110	normal specific responding	2
GO KINETOCHORE	Cellular component	25	22	http://www.broadinstitute.org/gsea/msigdb/cards/KINETOCHORE	0000	1110	normal specific responding	2
KEGG TRYPTOPHAN METABOLISM	Metabolism	40	38	http://www.broadinstitute.org/gsea/msigdb/cards/KEGG_TRYPTOPHAN_METABOLISM	0000	1110	normal specific responding	1
KEGG HOMOLOGOUS RECOMBINATION	Genetic Information Processing	28	26	http://www.broadinstitute.org/gsea/msigdb/cards/KEGG_HOMOLOGOUS_RECOMBINATION	0000	1110	normal specific responding	2
BIOCARTA G2 PATHWAY	Cell Cycle Regulation	24	23	http://www.broadinstitute.org/gsea/msigdb/cards/BIOCARTA_G2_PATHWAY	0000	1110	normal specific responding	6
BIOCARTA ATM PATHWAY	Apoptosis - Cell Signaling	20	20	http://www.broadinstitute.org/gsea/msigdb/cards/BIOCARTA_ATM_PATHWAY	0000	1110	normal specific responding	7
GO MUSCLE CELL DIFFERENTIATION	Biological process	22	20	http://www.broadinstitute.org/gsea/msigdb/cards/MUSCLE_CELL_DIFFERENTIATION	0000	1101	normal specific responding	2
GO SOLUBLE FRACTION	Cellular component	161	149	http://www.broadinstitute.org/gsea/msigdb/cards/SOLUBLE_FRACTION	0000	1100	normal specific responding	1
GO CHROMOSOME ORGANIZATION AND BIOGENESIS	Biological process	124	105	http://www.broadinstitute.org/gsea/msigdb/cards/CHROMOSOME_ORGANIZATION_AND_BIOGENESIS	0000	1100	normal specific responding	14
GO LYASE ACTIVITY	Molecular function	69	67	http://www.broadinstitute.org/gsea/msigdb/cards/LYASE_ACTIVITY	0000	1100	normal specific responding	1
GO ESTABLISHMENT AND OR MAINTENANCE OF CHROMATIN ARCHITECTURE	Biological process	77	66	http://www.broadinstitute.org/gsea/msigdb/cards/ESTABLISHMENT_AND_OR_MAINTENANCE_OF_CHROMATIN_ARCHITECTURE	0000	1100	normal specific responding	10
GO SH3 SH2 ADAPTOR ACTIVITY	Molecular function	43	42	http://www.broadinstitute.org/gsea/msigdb/cards/SH3_SH2_ADAPTOR_ACTIVITY	0000	1100	normal specific responding	2
GO UNFOLDED PROTEIN BINDING	Molecular function	42	40	http://www.broadinstitute.org/gsea/msigdb/cards/UNFOLDED_PROTEIN_BINDING	0000	1100	normal specific responding	1
GO MICROTUBULE	Cellular component	32	31	http://www.broadinstitute.org/gsea/msigdb/cards/MICROTUBULE	0000	1100	normal specific responding	1
GO MEIOTIC CELL CYCLE	Biological process	35	31	http://www.broadinstitute.org/gsea/msigdb/cards/MEIOTIC_CELL_CYCLE	0000	1100	normal specific responding	1
GO CONDENSED CHROMOSOME	Cellular component	34	29	http://www.broadinstitute.org/gsea/msigdb/cards/CONDENSED_CHROMOSOME	0000	1100	normal specific responding	0
GO CALMODULIN BINDING	Molecular function	25	25	http://www.broadinstitute.org/gsea/msigdb/cards/CALMODULIN_BINDING	0000	1100	normal specific responding	0
GO MITOTIC CELL CYCLE CHECKPOINT	Biological process	21	21	http://www.broadinstitute.org/gsea/msigdb/cards/MITOTIC_CELL_CYCLE_CHECKPOINT	0000	1100	normal specific responding	3
GO DNA POLYMERASE ACTIVITY	Molecular function	18	18	http://www.broadinstitute.org/gsea/msigdb/cards/DNA_POLYMERASE_ACTIVITY	0000	1100	normal specific responding	1
GO EXONUCLEASE ACTIVITY	Molecular function	19	18	http://www.broadinstitute.org/gsea/msigdb/cards/EXONUCLEASE_ACTIVITY	0000	1100	normal specific responding	1
GO SPINDLE POLE	Cellular component	18	17	http://www.broadinstitute.org/gsea/msigdb/cards/SPINDLE_POLE	0000	1100	normal specific responding	1
GO HORMONE SECRETION	Biological process	17	17	http://www.broadinstitute.org/gsea/msigdb/cards/HORMONE_SECRETION	0000	1100	normal specific responding	0
GO REGULATION OF CATABOLIC PROCESS	Biological process	16	16	http://www.broadinstitute.org/gsea/msigdb/cards/REGULATION_OF_CATABOLIC_PROCESS	0000	1100	normal specific responding	2
GO MICROTUBULE ORGANIZING CENTER ORGANIZATION AND BIOGENESIS	Biological process	16	15	http://www.broadinstitute.org/gsea/msigdb/cards/MICROTUBULE_ORGANIZING_CENTER_ORGANIZATION_AND_BIOGENESIS	0000	1100	normal specific responding	2
KEGG ADIPOCYTOKINE SIGNALING PATHWAY	Organismal Systems	67	66	http://www.broadinstitute.org/gsea/msigdb/cards/KEGG_ADIPOCYTOKINE_SIGNALING_PATHWAY	0000	1100	normal specific responding	7
KEGG HEDGEHOG SIGNALING PATHWAY	Environmental Information Processing	56	53	http://www.broadinstitute.org/gsea/msigdb/cards/KEGG_HEDGEHOG_SIGNALING_PATHWAY	0000	1100	normal specific responding	2
KEGG HISTIDINE METABOLISM	Metabolism	29	27	http://www.broadinstitute.org/gsea/msigdb/cards/KEGG_HISTIDINE_METABOLISM	0000	1100	normal specific responding	1
KEGG BETA ALANINE METABOLISM	Metabolism	22	22	http://www.broadinstitute.org/gsea/msigdb/cards/KEGG_BETA_ALANINE_METABOLISM	0000	1100	normal specific responding	1
GO TRANSCRIPTION COREPRESSOR ACTIVITY	Molecular function	94	80	http://www.broadinstitute.org/gsea/msigdb/cards/TRANSCRIPTION_COREPRESSOR_ACTIVITY	0000	1011	normal specific responding	7
GO CYTOSOL	Cellular component	205	186	http://www.broadinstitute.org/gsea/msigdb/cards/CYTOSOL	0000	1010	normal specific responding	12
GO AMINO ACID AND DERIVATIVE METABOLIC PROCESS	Biological process	101	96	http://www.broadinstitute.org/gsea/msigdb/cards/AMINO_ACID_AND_DERIVATIVE_METABOLIC_PROCESS	0000	1010	normal specific responding	0
GO AMINO ACID METABOLIC PROCESS	Biological process	78	73	http://www.broadinstitute.org/gsea/msigdb/cards/AMINO_ACID_METABOLIC_PROCESS	0000	1010	normal specific responding	0
GO OXIDOREDUCTASE ACTIVITY ACTING ON CH OH GROUP OF DONORS	Molecular function	64	60	http://www.broadinstitute.org/gsea/msigdb/cards/OXIDOREDUCTASE_ACTIVITY_ACTING_ON_CH_OH_GROUP_OF_DONORS	0000	1010	normal specific responding	1
GO NITROGEN COMPOUND CATABOLIC PROCESS	Biological process	29	26	http://www.broadinstitute.org/gsea/msigdb/cards/NITROGEN_COMPOUND_CATABOLIC_PROCESS	0000	1010	normal specific responding	0
GO OXIDOREDUCTASE ACTIVITY ACTING ON NADH OR NADPH	Molecular function	25	25	http://www.broadinstitute.org/gsea/msigdb/cards/OXIDOREDUCTASE_ACTIVITY_ACTING_ON_NADH_OR_NADPH	0000	1010	normal specific responding	0
GO AMINE CATABOLIC PROCESS	Biological process	27	24	http://www.broadinstitute.org/gsea/msigdb/cards/AMINE_CATABOLIC_PROCESS	0000	1010	normal specific responding	0
GO AMINO ACID CATABOLIC PROCESS	Biological process	25	22	http://www.broadinstitute.org/gsea/msigdb/cards/AMINO_ACID_CATABOLIC_PROCESS	0000	1010	normal specific responding	0
GO NEGATIVE REGULATION OF DNA BINDING	Biological process	17	16	http://www.broadinstitute.org/gsea/msigdb/cards/NEGATIVE_REGULATION_OF_DNA_BINDING	0000	1010	normal specific responding	1
GO OXIDOREDUCTASE ACTIVITY ACTING ON THE ALDEHYDE OR OXO GROUP OF DONORSNAD OR NADP AS ACCEPTOR	Molecular function	16	16	http://www.broadinstitute.org/gsea/msigdb/cards/OXIDOREDUCTASE_ACTIVITY_ACTING_ON_THE_ALDEHYDE_OR_OXO_GROUP_OF_DONORSNAD_OR_NADP_AS_ACCEPTOR	0000	1010	normal specific responding	1
KEGG CARDIAC MUSCLE CONTRACTION	Organismal Systems	80	70	http://www.broadinstitute.org/gsea/msigdb/cards/KEGG_CARDIAC_MUSCLE_CONTRACTION	0000	1010	normal specific responding	3
BIOCARTA MPR PATHWAY	Cell Signaling-Developmental Biology	34	32	http://www.broadinstitute.org/gsea/msigdb/cards/BIOCARTA_MPR_PATHWAY	0000	1010	normal specific responding	3
GO INTERCELLULAR JUNCTION	Cellular component	65	60	http://www.broadinstitute.org/gsea/msigdb/cards/INTERCELLULAR_JUNCTION	0000	1001	normal specific responding	2
GO ACTIN FILAMENT	Cellular component	18	16	http://www.broadinstitute.org/gsea/msigdb/cards/ACTIN_FILAMENT	0000	1001	normal specific responding	2
GO HYDROLASE ACTIVITY ACTING ON ESTER BONDS	Molecular function	269	255	http://www.broadinstitute.org/gsea/msigdb/cards/HYDROLASE_ACTIVITY_ACTING_ON_ESTER_BONDS	0000	1000	normal specific responding	9
GO OXIDOREDUCTASE ACTIVITY GO 0016616	Molecular function	58	54	http://www.broadinstitute.org/gsea/msigdb/cards/OXIDOREDUCTASE_ACTIVITY_GO_0016616	0000	1000	normal specific responding	1
GO HYDROLASE ACTIVITY ACTING ON CARBON NITROGEN NOT PEPTIDEBONDS	Molecular function	46	44	http://www.broadinstitute.org/gsea/msigdb/cards/HYDROLASE_ACTIVITY_ACTING_ON_CARBON_NITROGEN_NOT_PEPTIDEBONDS	0000	1000	normal specific responding	1
GO BLOOD COAGULATION	Biological process	43	41	http://www.broadinstitute.org/gsea/msigdb/cards/BLOOD_COAGULATION	0000	1000	normal specific responding	2
GO METHYLTRANSFERASE ACTIVITY	Molecular function	36	34	http://www.broadinstitute.org/gsea/msigdb/cards/METHYLTRANSFERASE_ACTIVITY	0000	1000	normal specific responding	7
GO HEART DEVELOPMENT	Biological process	37	33	http://www.broadinstitute.org/gsea/msigdb/cards/HEART_DEVELOPMENT	0000	1000	normal specific responding	3
GO ISOMERASE ACTIVITY	Molecular function	35	33	http://www.broadinstitute.org/gsea/msigdb/cards/ISOMERASE_ACTIVITY	0000	1000	normal specific responding	1
GO CARBON OXYGEN LYASE ACTIVITY	Molecular function	31	31	http://www.broadinstitute.org/gsea/msigdb/cards/CARBON_OXYGEN_LYASE_ACTIVITY	0000	1000	normal specific responding	1
GO CARBOXYLESTERASE ACTIVITY	Molecular function	33	31	http://www.broadinstitute.org/gsea/msigdb/cards/CARBOXYLESTERASE_ACTIVITY	0000	1000	normal specific responding	0
GO STRUCTURAL CONSTITUENT OF MUSCLE	Molecular function	33	31	http://www.broadinstitute.org/gsea/msigdb/cards/STRUCTURAL_CONSTITUENT_OF_MUSCLE	0000	1000	normal specific responding	2
GO RESPONSE TO NUTRIENT LEVELS	Biological process	29	27	http://www.broadinstitute.org/gsea/msigdb/cards/RESPONSE_TO_NUTRIENT_LEVELS	0000	1000	normal specific responding	2
GO NEGATIVE REGULATION OF CELL DIFFERENTIATION	Biological process	28	27	http://www.broadinstitute.org/gsea/msigdb/cards/NEGATIVE_REGULATION_OF_CELL_DIFFERENTIATION	0000	1000	normal specific responding	5
GO HYDRO LYASE ACTIVITY	Molecular function	27	27	http://www.broadinstitute.org/gsea/msigdb/cards/HYDRO_LYASE_ACTIVITY	0000	1000	normal specific responding	1
GO EXOCYTOSIS	Biological process	25	23	http://www.broadinstitute.org/gsea/msigdb/cards/EXOCYTOSIS	0000	1000	normal specific responding	0
GO DEOXYRIBONUCLEASE ACTIVITY	Molecular function	22	22	http://www.broadinstitute.org/gsea/msigdb/cards/DEOXYRIBONUCLEASE_ACTIVITY	0000	1000	normal specific responding	2
GO DETECTION OF STIMULUS INVOLVED IN SENSORY PERCEPTION	Biological process	21	19	http://www.broadinstitute.org/gsea/msigdb/cards/DETECTION_OF_STIMULUS_INVOLVED_IN_SENSORY_PERCEPTION	0000	1000	normal specific responding	0
GO NUCLEOTIDE EXCISION REPAIR	Biological process	20	19	http://www.broadinstitute.org/gsea/msigdb/cards/NUCLEOTIDE_EXCISION_REPAIR	0000	1000	normal specific responding	8
GO REGULATION OF MYELOID CELL DIFFERENTIATION	Biological process	19	18	http://www.broadinstitute.org/gsea/msigdb/cards/REGULATION_OF_MYELOID_CELL_DIFFERENTIATION	0000	1000	normal specific responding	3
GO CARBON CARBON LYASE ACTIVITY	Molecular function	18	18	http://www.broadinstitute.org/gsea/msigdb/cards/CARBON_CARBON_LYASE_ACTIVITY	0000	1000	normal specific responding	0
GO L AMINO ACID TRANSMEMBRANE TRANSPORTER ACTIVITY	Molecular function	17	17	http://www.broadinstitute.org/gsea/msigdb/cards/L_AMINO_ACID_TRANSMEMBRANE_TRANSPORTER_ACTIVITY	0000	1000	normal specific responding	0
GO MEIOSIS I	Biological process	20	16	http://www.broadinstitute.org/gsea/msigdb/cards/MEIOSIS_I	0000	1000	normal specific responding	1
GO RHO GTPASE ACTIVATOR ACTIVITY	Molecular function	19	16	http://www.broadinstitute.org/gsea/msigdb/cards/RHO_GTPASE_ACTIVATOR_ACTIVITY	0000	1000	normal specific responding	0
GO SPINDLE MICROTUBULE	Cellular component	16	15	http://www.broadinstitute.org/gsea/msigdb/cards/SPINDLE_MICROTUBULE	0000	1000	normal specific responding	1
KEGG TIGHT JUNCTION	Cellular Processes	134	125	http://www.broadinstitute.org/gsea/msigdb/cards/KEGG_TIGHT_JUNCTION	0000	1000	normal specific responding	12
KEGG VASCULAR SMOOTH MUSCLE CONTRACTION	Organismal Systems	115	110	http://www.broadinstitute.org/gsea/msigdb/cards/KEGG_VASCULAR_SMOOTH_MUSCLE_CONTRACTION	0000	1000	normal specific responding	9
KEGG LONG TERM POTENTIATION	Organismal Systems	70	68	http://www.broadinstitute.org/gsea/msigdb/cards/KEGG_LONG_TERM_POTENTIATION	0000	1000	normal specific responding	10
KEGG LYSINE DEGRADATION	Metabolism	44	43	http://www.broadinstitute.org/gsea/msigdb/cards/KEGG_LYSINE_DEGRADATION	0000	1000	normal specific responding	5
KEGG FATTY ACID METABOLISM	Metabolism	42	39	http://www.broadinstitute.org/gsea/msigdb/cards/KEGG_FATTY_ACID_METABOLISM	0000	1000	normal specific responding	2
KEGG PRIMARY IMMUNODEFICIENCY	Human Diseases	35	35	http://www.broadinstitute.org/gsea/msigdb/cards/KEGG_PRIMARY_IMMUNODEFICIENCY	0000	1000	normal specific responding	5
KEGG SNARE INTERACTIONS IN VESICULAR TRANSPORT	Genetic Information Processing	38	34	http://www.broadinstitute.org/gsea/msigdb/cards/KEGG_SNARE_INTERACTIONS_IN_VESICULAR_TRANSPORT	0000	1000	normal specific responding	1
GO TRANSITION METAL ION BINDING	Molecular function	111	105	http://www.broadinstitute.org/gsea/msigdb/cards/TRANSITION_METAL_ION_BINDING	0000	0110	normal specific responding	9
GO MRNA METABOLIC PROCESS	Biological process	84	62	http://www.broadinstitute.org/gsea/msigdb/cards/MRNA_METABOLIC_PROCESS	0000	0110	normal specific responding	3
GO NUCLEASE ACTIVITY	Molecular function	55	52	http://www.broadinstitute.org/gsea/msigdb/cards/NUCLEASE_ACTIVITY	0000	0110	normal specific responding	5
GO MRNA PROCESSING GO 0006397	Biological process	73	51	http://www.broadinstitute.org/gsea/msigdb/cards/MRNA_PROCESSING_GO_0006397	0000	0110	normal specific responding	3
GO NUCLEOBASENUCLEOSIDE AND NUCLEOTIDE METABOLIC PROCESS	Biological process	52	48	http://www.broadinstitute.org/gsea/msigdb/cards/NUCLEOBASENUCLEOSIDE_AND_NUCLEOTIDE_METABOLIC_PROCESS	0000	0110	normal specific responding	2
GO FEMALE PREGNANCY	Biological process	53	44	http://www.broadinstitute.org/gsea/msigdb/cards/FEMALE_PREGNANCY	0000	0110	normal specific responding	0
GO REGULATION OF CYCLIN DEPENDENT PROTEIN KINASE ACTIVITY	Biological process	43	42	http://www.broadinstitute.org/gsea/msigdb/cards/REGULATION_OF_CYCLIN_DEPENDENT_PROTEIN_KINASE_ACTIVITY	0000	0110	normal specific responding	7
GO RESPONSE TO UV	Biological process	26	24	http://www.broadinstitute.org/gsea/msigdb/cards/RESPONSE_TO_UV	0000	0110	normal specific responding	6
GO RIBONUCLEASE ACTIVITY	Molecular function	25	23	http://www.broadinstitute.org/gsea/msigdb/cards/RIBONUCLEASE_ACTIVITY	0000	0110	normal specific responding	1
GO TRANSCRIPTION FROM RNA POLYMERASE III PROMOTER	Biological process	19	19	http://www.broadinstitute.org/gsea/msigdb/cards/TRANSCRIPTION_FROM_RNA_POLYMERASE_III_PROMOTER	0000	0110	normal specific responding	1
GO INTEGRIN COMPLEX	Cellular component	19	18	http://www.broadinstitute.org/gsea/msigdb/cards/INTEGRIN_COMPLEX	0000	0110	normal specific responding	1
KEGG HEMATOPOIETIC CELL LINEAGE	Organismal Systems	88	83	http://www.broadinstitute.org/gsea/msigdb/cards/KEGG_HEMATOPOIETIC_CELL_LINEAGE	0000	0110	normal specific responding	4
KEGG GLYOXYLATE AND DICARBOXYLATE METABOLISM	Metabolism	16	15	http://www.broadinstitute.org/gsea/msigdb/cards/KEGG_GLYOXYLATE_AND_DICARBOXYLATE_METABOLISM	0000	0110	normal specific responding	0
GO CALCIUM ION BINDING	Molecular function	104	99	http://www.broadinstitute.org/gsea/msigdb/cards/CALCIUM_ION_BINDING	0000	0101	normal specific responding	0
KEGG STARCH AND SUCROSE METABOLISM	Metabolism	52	39	http://www.broadinstitute.org/gsea/msigdb/cards/KEGG_STARCH_AND_SUCROSE_METABOLISM	0000	0101	normal specific responding	0
GO IMMUNE SYSTEM PROCESS	Biological process	332	309	http://www.broadinstitute.org/gsea/msigdb/cards/IMMUNE_SYSTEM_PROCESS	0000	0100	normal specific responding	28
GO ESTABLISHMENT OF PROTEIN LOCALIZATION	Biological process	190	166	http://www.broadinstitute.org/gsea/msigdb/cards/ESTABLISHMENT_OF_PROTEIN_LOCALIZATION	0000	0100	normal specific responding	12
GO NEGATIVE REGULATION OF TRANSCRIPTION DNA DEPENDENT	Biological process	130	113	http://www.broadinstitute.org/gsea/msigdb/cards/NEGATIVE_REGULATION_OF_TRANSCRIPTION_DNA_DEPENDENT	0000	0100	normal specific responding	15
GO NEGATIVE REGULATION OF RNA METABOLIC PROCESS	Biological process	132	113	http://www.broadinstitute.org/gsea/msigdb/cards/NEGATIVE_REGULATION_OF_RNA_METABOLIC_PROCESS	0000	0100	normal specific responding	15
GO NEGATIVE REGULATION OF TRANSCRIPTION FROM RNA POLYMERASE II PROMOTER	Biological process	84	75	http://www.broadinstitute.org/gsea/msigdb/cards/NEGATIVE_REGULATION_OF_TRANSCRIPTION_FROM_RNA_POLYMERASE_II_PROMOTER	0000	0100	normal specific responding	11
GO REGULATION OF CELL DIFFERENTIATION	Biological process	60	53	http://www.broadinstitute.org/gsea/msigdb/cards/REGULATION_OF_CELL_DIFFERENTIATION	0000	0100	normal specific responding	8
GO CHROMATIN MODIFICATION	Biological process	55	45	http://www.broadinstitute.org/gsea/msigdb/cards/CHROMATIN_MODIFICATION	0000	0100	normal specific responding	7
GO AMINE TRANSPORT	Biological process	38	38	http://www.broadinstitute.org/gsea/msigdb/cards/AMINE_TRANSPORT	0000	0100	normal specific responding	0
GO MYELOID CELL DIFFERENTIATION	Biological process	37	34	http://www.broadinstitute.org/gsea/msigdb/cards/MYELOID_CELL_DIFFERENTIATION	0000	0100	normal specific responding	4
GO SINGLE STRANDED DNA BINDING	Molecular function	35	32	http://www.broadinstitute.org/gsea/msigdb/cards/SINGLE_STRANDED_DNA_BINDING	0000	0100	normal specific responding	10
GO TRANSLATION REGULATOR ACTIVITY	Molecular function	41	31	http://www.broadinstitute.org/gsea/msigdb/cards/TRANSLATION_REGULATOR_ACTIVITY	0000	0100	normal specific responding	1
GO CHROMATIN BINDING	Molecular function	32	31	http://www.broadinstitute.org/gsea/msigdb/cards/CHROMATIN_BINDING	0000	0100	normal specific responding	5
GO ANION TRANSPORT	Biological process	31	29	http://www.broadinstitute.org/gsea/msigdb/cards/ANION_TRANSPORT	0000	0100	normal specific responding	1
GO REGULATION OF GENE EXPRESSION EPIGENETIC	Biological process	30	28	http://www.broadinstitute.org/gsea/msigdb/cards/REGULATION_OF_GENE_EXPRESSION_EPIGENETIC	0000	0100	normal specific responding	6
GO LIPID RAFT	Cellular component	29	27	http://www.broadinstitute.org/gsea/msigdb/cards/LIPID_RAFT	0000	0100	normal specific responding	3
GO CHROMATIN REMODELING	Biological process	25	21	http://www.broadinstitute.org/gsea/msigdb/cards/CHROMATIN_REMODELING	0000	0100	normal specific responding	3
GO RNA SPLICINGVIA TRANSESTERIFICATION REACTIONS	Biological process	35	21	http://www.broadinstitute.org/gsea/msigdb/cards/RNA_SPLICINGVIA_TRANSESTERIFICATION_REACTIONS	0000	0100	normal specific responding	0
GO DNA INTEGRITY CHECKPOINT	Biological process	24	20	http://www.broadinstitute.org/gsea/msigdb/cards/DNA_INTEGRITY_CHECKPOINT	0000	0100	normal specific responding	2
GO HOMEOSTASIS OF NUMBER OF CELLS	Biological process	20	19	http://www.broadinstitute.org/gsea/msigdb/cards/HOMEOSTASIS_OF_NUMBER_OF_CELLS	0000	0100	normal specific responding	4
GO DNA DAMAGE CHECKPOINT	Biological process	20	17	http://www.broadinstitute.org/gsea/msigdb/cards/DNA_DAMAGE_CHECKPOINT	0000	0100	normal specific responding	2
GO LIPOPROTEIN BINDING	Molecular function	18	17	http://www.broadinstitute.org/gsea/msigdb/cards/LIPOPROTEIN_BINDING	0000	0100	normal specific responding	0
GO TRANSLATION INITIATION FACTOR ACTIVITY	Molecular function	24	17	http://www.broadinstitute.org/gsea/msigdb/cards/TRANSLATION_INITIATION_FACTOR_ACTIVITY	0000	0100	normal specific responding	1
GO INORGANIC ANION TRANSPORT	Biological process	18	16	http://www.broadinstitute.org/gsea/msigdb/cards/INORGANIC_ANION_TRANSPORT	0000	0100	normal specific responding	1
GO MICROTUBULE BASED MOVEMENT	Biological process	16	16	http://www.broadinstitute.org/gsea/msigdb/cards/MICROTUBULE_BASED_MOVEMENT	0000	0100	normal specific responding	1
GO DNA DIRECTED RNA POLYMERASE COMPLEX	Cellular component	18	15	http://www.broadinstitute.org/gsea/msigdb/cards/DNA_DIRECTED_RNA_POLYMERASE_COMPLEX	0000	0100	normal specific responding	0
GO RNA POLYMERASE COMPLEX	Cellular component	18	15	http://www.broadinstitute.org/gsea/msigdb/cards/RNA_POLYMERASE_COMPLEX	0000	0100	normal specific responding	0
GO NUCLEAR DNA DIRECTED RNA POLYMERASE COMPLEX	Cellular component	18	15	http://www.broadinstitute.org/gsea/msigdb/cards/NUCLEAR_DNA_DIRECTED_RNA_POLYMERASE_COMPLEX	0000	0100	normal specific responding	0
KEGG OOCYTE MEIOSIS	Cellular Processes	114	106	http://www.broadinstitute.org/gsea/msigdb/cards/KEGG_OOCYTE_MEIOSIS	0000	0100	normal specific responding	4
KEGG PROGESTERONE MEDIATED OOCYTE MATURATION	Organismal Systems	86	82	http://www.broadinstitute.org/gsea/msigdb/cards/KEGG_PROGESTERONE_MEDIATED_OOCYTE_MATURATION	0000	0100	normal specific responding	8
GO CELL MIGRATION	Biological process	96	90	http://www.broadinstitute.org/gsea/msigdb/cards/CELL_MIGRATION	0000	0011	normal specific responding	6
GO UDP GLYCOSYLTRANSFERASE ACTIVITY	Molecular function	42	37	http://www.broadinstitute.org/gsea/msigdb/cards/UDP_GLYCOSYLTRANSFERASE_ACTIVITY	0000	0011	normal specific responding	1
GO TRANSFERASE ACTIVITY TRANSFERRING ALKYL OR ARYLOTHER THAN METHYLGROUPS	Molecular function	30	30	http://www.broadinstitute.org/gsea/msigdb/cards/TRANSFERASE_ACTIVITY_TRANSFERRING_ALKYL_OR_ARYLOTHER_THAN_METHYLGROUPS	0000	0011	normal specific responding	0
GO PROTEASOME COMPLEX	Cellular component	23	22	http://www.broadinstitute.org/gsea/msigdb/cards/PROTEASOME_COMPLEX	0000	0011	normal specific responding	0
GO TRANSMEMBRANE RECEPTOR PROTEIN PHOSPHATASE ACTIVITY	Molecular function	19	19	http://www.broadinstitute.org/gsea/msigdb/cards/TRANSMEMBRANE_RECEPTOR_PROTEIN_PHOSPHATASE_ACTIVITY	0000	0011	normal specific responding	0
GO CELL PROLIFERATION GO 0008283	Biological process	513	474	http://www.broadinstitute.org/gsea/msigdb/cards/CELL_PROLIFERATION_GO_0008283	0000	0010	normal specific responding	46
GO CATABOLIC PROCESS	Biological process	225	206	http://www.broadinstitute.org/gsea/msigdb/cards/CATABOLIC_PROCESS	0000	0010	normal specific responding	11
GO CATION BINDING	Molecular function	213	202	http://www.broadinstitute.org/gsea/msigdb/cards/CATION_BINDING	0000	0010	normal specific responding	9
GO CELLULAR CATABOLIC PROCESS	Biological process	212	195	http://www.broadinstitute.org/gsea/msigdb/cards/CELLULAR_CATABOLIC_PROCESS	0000	0010	normal specific responding	9
GO ORGANIC ACID METABOLIC PROCESS	Biological process	180	168	http://www.broadinstitute.org/gsea/msigdb/cards/ORGANIC_ACID_METABOLIC_PROCESS	0000	0010	normal specific responding	4
GO CARBOXYLIC ACID METABOLIC PROCESS	Biological process	178	166	http://www.broadinstitute.org/gsea/msigdb/cards/CARBOXYLIC_ACID_METABOLIC_PROCESS	0000	0010	normal specific responding	4
GO MACROMOLECULE CATABOLIC PROCESS	Biological process	137	127	http://www.broadinstitute.org/gsea/msigdb/cards/MACROMOLECULE_CATABOLIC_PROCESS	0000	0010	normal specific responding	8
GO GENERATION OF PRECURSOR METABOLITES AND ENERGY	Biological process	123	119	http://www.broadinstitute.org/gsea/msigdb/cards/GENERATION_OF_PRECURSOR_METABOLITES_AND_ENERGY	0000	0010	normal specific responding	5
GO BIOPOLYMER CATABOLIC PROCESS	Biological process	117	107	http://www.broadinstitute.org/gsea/msigdb/cards/BIOPOLYMER_CATABOLIC_PROCESS	0000	0010	normal specific responding	8
GO ZINC ION BINDING	Molecular function	90	87	http://www.broadinstitute.org/gsea/msigdb/cards/ZINC_ION_BINDING	0000	0010	normal specific responding	6
GO PEPTIDE BINDING	Molecular function	85	78	http://www.broadinstitute.org/gsea/msigdb/cards/PEPTIDE_BINDING	0000	0010	normal specific responding	1
GO CELLULAR PROTEIN CATABOLIC PROCESS	Biological process	58	53	http://www.broadinstitute.org/gsea/msigdb/cards/CELLULAR_PROTEIN_CATABOLIC_PROCESS	0000	0010	normal specific responding	0
GO REGULATION OF DNA BINDING	Biological process	47	43	http://www.broadinstitute.org/gsea/msigdb/cards/REGULATION_OF_DNA_BINDING	0000	0010	normal specific responding	6
GO G PROTEIN SIGNALING COUPLED TO IP3 SECOND MESSENGERPHOSPHOLIPASE C ACTIVATING	Biological process	45	40	http://www.broadinstitute.org/gsea/msigdb/cards/G_PROTEIN_SIGNALING_COUPLED_TO_IP3_SECOND_MESSENGERPHOSPHOLIPASE_C_ACTIVATING	0000	0010	normal specific responding	2
GO PROTEIN UBIQUITINATION	Biological process	40	38	http://www.broadinstitute.org/gsea/msigdb/cards/PROTEIN_UBIQUITINATION	0000	0010	normal specific responding	9
GO GOLGI MEMBRANE	Cellular component	45	37	http://www.broadinstitute.org/gsea/msigdb/cards/GOLGI_MEMBRANE	0000	0010	normal specific responding	2
GO CELL SUBSTRATE ADHESION	Biological process	39	37	http://www.broadinstitute.org/gsea/msigdb/cards/CELL_SUBSTRATE_ADHESION	0000	0010	normal specific responding	6
GO REGULATION OF TRANSCRIPTION FACTOR ACTIVITY	Biological process	40	36	http://www.broadinstitute.org/gsea/msigdb/cards/REGULATION_OF_TRANSCRIPTION_FACTOR_ACTIVITY	0000	0010	normal specific responding	5
GO CELL MATRIX ADHESION	Biological process	38	36	http://www.broadinstitute.org/gsea/msigdb/cards/CELL_MATRIX_ADHESION	0000	0010	normal specific responding	6
GO RHO PROTEIN SIGNAL TRANSDUCTION	Biological process	38	36	http://www.broadinstitute.org/gsea/msigdb/cards/RHO_PROTEIN_SIGNAL_TRANSDUCTION	0000	0010	normal specific responding	2
GO POSITIVE REGULATION OF CELLULAR COMPONENT ORGANIZATION AND BIOGENESIS	Biological process	36	34	http://www.broadinstitute.org/gsea/msigdb/cards/POSITIVE_REGULATION_OF_CELLULAR_COMPONENT_ORGANIZATION_AND_BIOGENESIS	0000	0010	normal specific responding	3
GO SPECIFIC RNA POLYMERASE II TRANSCRIPTION FACTOR ACTIVITY	Molecular function	35	34	http://www.broadinstitute.org/gsea/msigdb/cards/SPECIFIC_RNA_POLYMERASE_II_TRANSCRIPTION_FACTOR_ACTIVITY	0000	0010	normal specific responding	2
GO RECEPTOR MEDIATED ENDOCYTOSIS	Biological process	33	31	http://www.broadinstitute.org/gsea/msigdb/cards/RECEPTOR_MEDIATED_ENDOCYTOSIS	0000	0010	normal specific responding	4
GO OUTER MEMBRANE	Cellular component	25	24	http://www.broadinstitute.org/gsea/msigdb/cards/OUTER_MEMBRANE	0000	0010	normal specific responding	2
GO ORGANELLE OUTER MEMBRANE	Cellular component	24	23	http://www.broadinstitute.org/gsea/msigdb/cards/ORGANELLE_OUTER_MEMBRANE	0000	0010	normal specific responding	2
GO SPHINGOLIPID METABOLIC PROCESS	Biological process	29	23	http://www.broadinstitute.org/gsea/msigdb/cards/SPHINGOLIPID_METABOLIC_PROCESS	0000	0010	normal specific responding	0
GO ENDONUCLEASE ACTIVITY	Molecular function	25	23	http://www.broadinstitute.org/gsea/msigdb/cards/ENDONUCLEASE_ACTIVITY	0000	0010	normal specific responding	3
GO DNA CATABOLIC PROCESS	Biological process	23	22	http://www.broadinstitute.org/gsea/msigdb/cards/DNA_CATABOLIC_PROCESS	0000	0010	normal specific responding	6
GO REGULATION OF INTRACELLULAR TRANSPORT	Biological process	25	22	http://www.broadinstitute.org/gsea/msigdb/cards/REGULATION_OF_INTRACELLULAR_TRANSPORT	0000	0010	normal specific responding	3
GO GLUTAMATE RECEPTOR ACTIVITY	Molecular function	20	20	http://www.broadinstitute.org/gsea/msigdb/cards/GLUTAMATE_RECEPTOR_ACTIVITY	0000	0010	normal specific responding	0
GO REGULATION OF TRANSLATIONAL INITIATION	Biological process	31	19	http://www.broadinstitute.org/gsea/msigdb/cards/REGULATION_OF_TRANSLATIONAL_INITIATION	0000	0010	normal specific responding	1
GO OXYGEN AND REACTIVE OXYGEN SPECIES METABOLIC PROCESS	Biological process	20	19	http://www.broadinstitute.org/gsea/msigdb/cards/OXYGEN_AND_REACTIVE_OXYGEN_SPECIES_METABOLIC_PROCESS	0000	0010	normal specific responding	0
GO MITOCHONDRIAL TRANSPORT	Biological process	21	19	http://www.broadinstitute.org/gsea/msigdb/cards/MITOCHONDRIAL_TRANSPORT	0000	0010	normal specific responding	2
GO PHAGOCYTOSIS	Biological process	17	17	http://www.broadinstitute.org/gsea/msigdb/cards/PHAGOCYTOSIS	0000	0010	normal specific responding	1
GO NEGATIVE REGULATION OF BINDING	Biological process	18	17	http://www.broadinstitute.org/gsea/msigdb/cards/NEGATIVE_REGULATION_OF_BINDING	0000	0010	normal specific responding	1
GO CALCIUM MEDIATED SIGNALING	Biological process	16	15	http://www.broadinstitute.org/gsea/msigdb/cards/CALCIUM_MEDIATED_SIGNALING	0000	0010	normal specific responding	1
GO BASE EXCISION REPAIR	Biological process	17	15	http://www.broadinstitute.org/gsea/msigdb/cards/BASE_EXCISION_REPAIR	0000	0010	normal specific responding	3
KEGG COLORECTAL CANCER	Human Diseases	62	61	http://www.broadinstitute.org/gsea/msigdb/cards/KEGG_COLORECTAL_CANCER	0000	0010	normal specific responding	22
BIOCARTA CELLCYCLE PATHWAY	Cell Cycle Regulation - Cell Signaling – Cytokines/Chemokines	23	22	http://www.broadinstitute.org/gsea/msigdb/cards/BIOCARTA_CELLCYCLE_PATHWAY	0000	0010	normal specific responding	9
BIOCARTA AMI PATHWAY	w	20	19	http://www.broadinstitute.org/gsea/msigdb/cards/BIOCARTA_AMI_PATHWAY	0000	0010	normal specific responding	0
BIOCARTA IL22BP PATHWAY	Cell Signaling-Cytokines/Chemokines-Immunology	16	16	http://www.broadinstitute.org/gsea/msigdb/cards/BIOCARTA_IL22BP_PATHWAY	0000	0010	normal specific responding	4
GO CELL JUNCTION	Cellular component	82	75	http://www.broadinstitute.org/gsea/msigdb/cards/CELL_JUNCTION	0000	0001	normal specific responding	2
GO RESPONSE TO VIRUS	Biological process	50	47	http://www.broadinstitute.org/gsea/msigdb/cards/RESPONSE_TO_VIRUS	0000	0001	normal specific responding	2
GO BRAIN DEVELOPMENT	Biological process	51	44	http://www.broadinstitute.org/gsea/msigdb/cards/BRAIN_DEVELOPMENT	0000	0001	normal specific responding	3
GO CARBOXYLIC ACID TRANSPORT	Biological process	41	41	http://www.broadinstitute.org/gsea/msigdb/cards/CARBOXYLIC_ACID_TRANSPORT	0000	0001	normal specific responding	0
GO TRANSFERASE ACTIVITY TRANSFERRING GROUPS OTHER THAN AMINO ACYL GROUPS	Molecular function	49	39	http://www.broadinstitute.org/gsea/msigdb/cards/TRANSFERASE_ACTIVITY_TRANSFERRING_GROUPS_OTHER_THAN_AMINO_ACYL_GROUPS	0000	0001	normal specific responding	5
GO STRIATED MUSCLE DEVELOPMENT	Biological process	40	38	http://www.broadinstitute.org/gsea/msigdb/cards/STRIATED_MUSCLE_DEVELOPMENT	0000	0001	normal specific responding	3
GO EXCRETION	Biological process	36	35	http://www.broadinstitute.org/gsea/msigdb/cards/EXCRETION	0000	0001	normal specific responding	0
GO MONOVALENT INORGANIC CATION TRANSMEMBRANE TRANSPORTER ACTIVITY	Molecular function	34	32	http://www.broadinstitute.org/gsea/msigdb/cards/MONOVALENT_INORGANIC_CATION_TRANSMEMBRANE_TRANSPORTER_ACTIVITY	0000	0001	normal specific responding	0
GO HYDROGEN ION TRANSMEMBRANE TRANSPORTER ACTIVITY	Molecular function	27	26	http://www.broadinstitute.org/gsea/msigdb/cards/HYDROGEN_ION_TRANSMEMBRANE_TRANSPORTER_ACTIVITY	0000	0001	normal specific responding	0
GO EPIDERMAL GROWTH FACTOR RECEPTOR SIGNALING PATHWAY	Biological process	22	19	http://www.broadinstitute.org/gsea/msigdb/cards/EPIDERMAL_GROWTH_FACTOR_RECEPTOR_SIGNALING_PATHWAY	0000	0001	normal specific responding	4
GO ACETYLTRANSFERASE ACTIVITY	Molecular function	25	19	http://www.broadinstitute.org/gsea/msigdb/cards/ACETYLTRANSFERASE_ACTIVITY	0000	0001	normal specific responding	4
GO N ACYLTRANSFERASE ACTIVITY	Molecular function	24	18	http://www.broadinstitute.org/gsea/msigdb/cards/N_ACYLTRANSFERASE_ACTIVITY	0000	0001	normal specific responding	4
GO N ACETYLTRANSFERASE ACTIVITY	Molecular function	21	17	http://www.broadinstitute.org/gsea/msigdb/cards/N_ACETYLTRANSFERASE_ACTIVITY	0000	0001	normal specific responding	4
GO ER NUCLEAR SIGNALING PATHWAY	Biological process	16	16	http://www.broadinstitute.org/gsea/msigdb/cards/ER_NUCLEAR_SIGNALING_PATHWAY	0000	0001	normal specific responding	1
GO AEROBIC RESPIRATION	Biological process	15	15	http://www.broadinstitute.org/gsea/msigdb/cards/AEROBIC_RESPIRATION	0000	0001	normal specific responding	3
GO POSITIVE REGULATION OF CELL CYCLE	Biological process	16	15	http://www.broadinstitute.org/gsea/msigdb/cards/POSITIVE_REGULATION_OF_CELL_CYCLE	0000	0001	normal specific responding	3
KEGG LEISHMANIA INFECTION	Human Diseases	72	62	http://www.broadinstitute.org/gsea/msigdb/cards/KEGG_LEISHMANIA_INFECTION	0000	0001	normal specific responding	4
KEGG SELENOAMINO ACID METABOLISM	Metabolism	26	21	http://www.broadinstitute.org/gsea/msigdb/cards/KEGG_SELENOAMINO_ACID_METABOLISM	0000	0001	normal specific responding	0
BIOCARTA NOS1 PATHWAY	Cell Signaling	24	20	http://www.broadinstitute.org/gsea/msigdb/cards/BIOCARTA_NOS1_PATHWAY	0000	0001	normal specific responding	1

## Sheet: Sheet2
4	0001	1110	divergent responding	1				419.38		182.36
4	0001	1110	divergent responding	1				0.062688		4.9726
4	0001	1110	divergent responding	1				-0.542		7.5362
4	0011	1100	divergent responding	1				-0.3354		40.207
4	0001	1110	divergent responding	1				-0.023519		1.959
4	0001	1110	divergent responding	1				-1.5505		14.875
4	0001	1110	divergent responding	1				-0.066231		1.2612
4	0100	1011	divergent responding	1				-2.9046		201.15
4	0001	1110	divergent responding	1				-0.22528		13.078
4	0010	1101	divergent responding	1				-0.95728		3.9199
3	0100	0011	divergent responding	0				39.099		26.132
3	1001	0010	divergent responding	-1				52.804		59.667
3	1001	0010	divergent responding	-1				-0.012442		2.9921
3	1101	0110	divergent responding	-1				92.093		17.603
3	0001	0110	divergent responding	0				-0.07927		2.9768
3	1011	0110	divergent responding	-1				-0.092464		48.672
3	1110	0011	divergent responding	-1				-12.796		94.46
3	1001	0010	divergent responding	-1				1.8612		17.433
3	1001	0010	divergent responding	-1				111.19		3.1077
3	1001	1110	divergent responding	0				105.67		4.601
3	1011	1100	divergent responding	0				-1.1642		38.738
3	0110	0001	divergent responding	0				16.931		125.6
3	0001	0110	divergent responding	0				21.87		155.22
3	1001	1110	divergent responding	0				9.1806		19.94
3	0001	1010	divergent responding	1				-2.2031		3.6996
3	0110	1011	divergent responding	1				-0.00010739		0.096016
3	0110	0001	divergent responding	0				0.13489		2.4984
3	0001	1100	divergent responding	1				1.906		6.7217
3	0011	1000	divergent responding	1				-13.295		187.24
3	1100	0010	divergent responding	-1				0.46584		0.7995
3	0001	1010	divergent responding	1				6.4298		4.0639
3	0110	1000	divergent responding	1				28.505		26.675
3	1010	0001	divergent responding	-1				-0.1243		0.091855
3	0101	1011	divergent responding	1				-0.072861		0.20984
3	1011	0101	divergent responding	-1				138.43		93.966
3	1010	0100	divergent responding	-1				-0.1164		2.5827
3	1010	0100	divergent responding	-1				5.7037		28.077
3	0001	1100	divergent responding	1				-22.295		3.8699
3	0001	1100	divergent responding	1				1.8118		24.834
3	1000	0011	divergent responding	-1				1.5955		27.512
3	0010	1100	divergent responding	1				0.15792		0.82294
3	0010	1100	divergent responding	1				-1.6377		56.626
3	0101	1000	divergent responding	1				-6.0519		3.4041
3	1000	0011	divergent responding	-1				-0.023603		0.23617
3	0001	0110	divergent responding	0				-4.8053		11.764
3	0001	0110	divergent responding	0				-22.081		1.3197
3	1001	0111	divergent responding	-1				-1.5377		2.3824
3	1001	0010	divergent responding	-1				33.858		32.944
3	1100	0001	divergent responding	-1				-0.35388		0.32667
3	0101	0010	divergent responding	0				89.562		120.71
3	0101	0010	divergent responding	0				-8.8596		108.12
3	0100	0011	divergent responding	0				-0.0077766		3.4203
3	1000	0101	divergent responding	-1				-0.0042748		4.0131
3	0011	1000	divergent responding	1				-0.0082917		0.85374
3	0010	1100	divergent responding	1				0.48434		9.1174
3	1001	0100	divergent responding	-1				-12.372		-0.0012478
2	1001	0011	divergent responding	-1				3.6762		10.233
2	0100	0001	divergent responding	0				0.042542		-1.2255
2	1000	0010	divergent responding	-1				4.0321		6.7369
2	1011	1000	divergent responding	0				0.016255		8.7311
2	0001	1011	divergent responding	1				-0.15053		-0.00029003
2	0001	0010	divergent responding	0				0.0027191		-1.0532
2	1000	0010	divergent responding	-1				0.2682		-1.348
2	1101	0111	divergent responding	-1				18.568		46.8
2	0001	0100	divergent responding	0				-0.16879		53.14
2	1000	0010	divergent responding	-1				55.272		84.013
2	1000	0001	divergent responding	-1				7.3921		0.69832
2	0001	0100	divergent responding	0				0.41286		-0.34906
2	1000	1110	divergent responding	0				-0.66629		25.223
2	1000	0100	divergent responding	-1				59.255		78.37
2	0001	1000	divergent responding	1				-0.63312		2.7044
2	0010	1110	divergent responding	1				-0.51161		0.0046807
2	1110	0010	divergent responding	-1				4.5414		1.7164
2	1000	0100	divergent responding	-1				-0.61141		26.822
2	0001	0010	divergent responding	0				-0.29461		1.5161
2	0010	1110	divergent responding	1				-0.31748		2.4099
2	1000	0001	divergent responding	-1				2.9971		5.9233
2	1000	0001	divergent responding	-1				0.52808		1.9701
2	1000	0100	divergent responding	-1				0.15948		0.00059413
2	1000	0001	divergent responding	-1				60.422		52.372
2	0111	1101	divergent responding	1				0.71949		28.125
2	0010	1110	divergent responding	1				0.22069		10.085
2	1010	0110	divergent responding	-1				-0.68368		21.926
2	1000	1011	divergent responding	0				1.5134		0.19694
2	0001	1000	divergent responding	1				-0.085865		-0.061898
2	1110	0010	divergent responding	-1				-0.25964		9.8936
2	0100	1110	divergent responding	1				1.8089		4.835
2	1000	0001	divergent responding	-1				0.16026		19.99
2	1000	0010	divergent responding	-1				-3.3405		1.6851
2	0010	1110	divergent responding	1				1.8357		18.601
2	0100	0010	divergent responding	0				-0.51354		17.242
2	1000	0100	divergent responding	-1				-0.26385		21.201
2	1000	1110	divergent responding	0				-0.20964		13.75
2	1000	0010	divergent responding	-1				0.8627		4.4952
2	1000	0010	divergent responding	-1				-0.37831		1.8925
2	0001	1101	divergent responding	1				-0.20421		5.2726
2	0010	0100	divergent responding	0				-0.088682		4.1267
2	0010	1110	divergent responding	1				0.70668		10.405
2	0001	0100	divergent responding	0				1.6227		2.9561
2	0010	1110	divergent responding	1				2.0454		-0.26162
2	1000	0010	divergent responding	-1				2.0454		-0.26162
2	1000	0010	divergent responding	-1				0.022493		1.6547
2	1000	0010	divergent responding	-1				0.97177		-0.1849
2	1110	1000	divergent responding	0				-0.51508		2.209
2	1000	0010	divergent responding	-1				-1.4826		-0.67796
2	1000	0100	divergent responding	-1				-1.6565		39.667
2	0001	1000	divergent responding	1				-0.29416		-0.26831
2	0001	1000	divergent responding	1				-0.99199		1.5271
2	0001	0010	divergent responding	0				-2.7542		26.198
2	0010	0001	divergent responding	0				-0.084439		0.92755
2	1010	0110	divergent responding	-1				9.4582		4.9617
2	1011	1110	divergent responding	0				3.0048		18.488
2	1000	0010	divergent responding	-1				-0.03297		0.65128
2	1000	0001	divergent responding	-1				0.16777		0.3121
2	0001	0010	divergent responding	0				0.69249		34.478
2	1000	0100	divergent responding	-1				0.23542		20.245
2	1000	0001	divergent responding	-1				-0.50038		9.7947
2	0100	1110	divergent responding	1				-0.19532		24.135
2	0100	0001	divergent responding	0				0.040053		1.2627
2	0100	0001	divergent responding	0				0.26847		5.8587
2	0100	0001	divergent responding	0				1.8354		3.5633
2	0001	0010	divergent responding	0				-0.074386		0.039062
2	0010	0001	divergent responding	0				0.93882		17.727
2	1000	0001	divergent responding	-1				-0.20773		0.50537
2	0010	1110	divergent responding	1				0.0028893		16.542
2	0100	0111	divergent responding	0				-0.57378		5.6807
2	0010	0100	divergent responding	0				-0.062367		1.0609
2	1000	0010	divergent responding	-1				-0.1934		0.64742
2	0100	0010	divergent responding	0				-0.0030947		0.00054294
2	1000	0010	divergent responding	-1				-0.72339		9.9492
2	1000	0100	divergent responding	-1				4.2475		1.7723
2	0010	0001	divergent responding	0				1.5658		6.4333
2	0010	1000	divergent responding	1				13.137		0.026539
2	1000	0010	divergent responding	-1				0.15015		8.8739
2	1000	0010	divergent responding	-1				2.7108		12.244
2	0010	0100	divergent responding	0				-1.7036		1.243
2	0001	1000	divergent responding	1				-2.9339		3.8516
2	0001	0111	divergent responding	0				7.5242		12.823
2	0100	0111	divergent responding	0				0.65774		1.589
2	0001	0100	divergent responding	0				-0.24335		-0.038512
2	0001	1000	divergent responding	1				-0.21631		1.9168
2	0010	0001	divergent responding	0				-0.32201		6.2639
2	1000	0100	divergent responding	-1				0.70084		0.00046674
2	0001	0010	divergent responding	0				0.073071		0.35476
2	0010	1000	divergent responding	1				-0.23962		0.10387
2	0001	1000	divergent responding	1				1.9055		1.6799
2	1000	0100	divergent responding	-1				-1.3537		16.061
2	1000	0100	divergent responding	-1				36.219		4.8229
2	0001	1000	divergent responding	1				-3.654		3.4698
2	1000	0100	divergent responding	-1				5.3634		2.9336
2	0010	1000	divergent responding	1				-0.26547		10.969
2	1000	0100	divergent responding	-1				4.1834		29.231
2	0111	0010	divergent responding	0				8.4552		5.3456
2	1011	1000	divergent responding	0				0.27581		6.2618
2	0100	1000	divergent responding	1				-0.18642		-0.52287
2	1110	1000	divergent responding	0				-0.52625		35.994
2	0100	0010	divergent responding	0				24.423		3.2153
2	0100	0111	divergent responding	0				6.9802		5.0948
2	1110	0010	divergent responding	-1				5.837		23.543
2	0010	0001	divergent responding	0				-0.34282		0.079713
2	0001	1000	divergent responding	1				-0.023799		-0.99843
2	0001	1000	divergent responding	1				-1.3785		-0.048121
2	0100	1000	divergent responding	1				1.0175		28.378
2	0001	1000	divergent responding	1				-0.50547		33.695
2	0100	0010	divergent responding	0				-0.32011		0.37633
2	0001	1011	divergent responding	1				-0.87353		94.798
2	1000	0010	divergent responding	-1				0.098642		-0.37164
2	0010	0100	divergent responding	0				-0.61181		26.32
2	0010	0100	divergent responding	0				6.8915		6.3079
2	1000	1110	divergent responding	0				0.00022717		6.1633
2	0100	1000	divergent responding	1				4.0687		4.832
2	0001	0100	divergent responding	0				0.040409		0.28307
2	0001	0111	divergent responding	0				-0.33641		33.735
2	0001	0010	divergent responding	0				0.0038717		1.8089
2	0010	1000	divergent responding	1				-0.0045673		9.2328
2	0100	0111	divergent responding	0				0.013455		7.4246
2	1000	0001	divergent responding	-1				0.00054974		2.5375
2	1000	0010	divergent responding	-1				-1.4407		3.5052
2	1000	0100	divergent responding	-1				-0.43702		0.31048
2	1011	0010	divergent responding	-1				0.97724		9.305
2	1011	0010	divergent responding	-1				0.0057998		2.7835
2	1110	0111	divergent responding	-1				-0.60703		0.0015352
2	0010	1000	divergent responding	1				27.433		4.1695
2	1000	0100	divergent responding	-1				0.31379		11.027
2	0010	1000	divergent responding	1				-0.9547		3.5742
2	1011	0111	divergent responding	-1				-0.096327		14.444
2	0001	0100	divergent responding	0				-0.94226		0.01522
1	0101	0111	divergent responding	0				2.7995		10.799
1	1010	0010	divergent responding	-1				0.91614		-0.070955
1	1010	1000	divergent responding	0				1.9804		0.0017994
1	1010	1000	divergent responding	0				0.54398		0.002666
1	1100	1101	divergent responding	0				-0.15667		-0.41395
1	0101	0111	divergent responding	0				0.42953		0.0080253
1	1010	1110	divergent responding	0				-0.05437		-0.53676
1	1000	1010	divergent responding	0				6.9641		0.8268
1	0011	0010	divergent responding	0				1.9843		0.40303
1	0001	0101	divergent responding	0				0.52657		0.056247
1	1001	0001	divergent responding	-1				-1.5139		0.075073
1	1000	1010	divergent responding	0				0.87343		14.908
1	0010	0011	divergent responding	0				-0.54408		4.2187
1	1010	0010	divergent responding	-1				-1.0134		2.4305
1	0101	0111	divergent responding	0				-0.54408		4.2187
1	1010	1000	divergent responding	0				-1.0134		2.4305
1	0011	0010	divergent responding	0				-0.22266		-0.22302
1	0110	0010	divergent responding	0				0.00028395		10.003
1	0110	0100	divergent responding	0				-0.0036789		8.5252
1	1100	1000	divergent responding	0				29.961		11.182
1	0011	0010	divergent responding	0				0.018456		-0.48352
1	0011	0010	divergent responding	0				12.194		2.7308
1	0110	0100	divergent responding	0				-0.89096		17.405
1	0100	0110	divergent responding	0				-0.10245		0.58242
1	0001	0101	divergent responding	0				0.076149		0.035876
1	0011	0001	divergent responding	0				0.52781		-0.061383
1	1000	1010	divergent responding	0				0.066028		18.781
1	0001	0101	divergent responding	0				-0.18787		0.69402
1	1010	1000	divergent responding	0				-0.18787		0.69402
1	0101	0100	divergent responding	0				2.0009		5.7656
1	0101	0001	divergent responding	0				0.00023734		-0.36877
1	0101	0111	divergent responding	0				12.847		5.8351
1	1000	1100	divergent responding	0				5.1406		0.44685
1	1100	1000	divergent responding	0				0.15047		-0.0087969
1	1011	1010	divergent responding	0				6.4336		-0.50231
1	0100	0110	divergent responding	0				-0.76008		-0.048499
1	0101	0111	divergent responding	0				0.9694		3.6291
1	1001	1000	divergent responding	0				-0.32287		8.2391
1	0010	0011	divergent responding	0				-0.015002		8.6782
1	0100	0101	divergent responding	0				-1.6107		-0.10466
1	0101	0001	divergent responding	0				-1.0561		1.0136
1	0100	1100	divergent responding	1				-0.80859		-0.12054
1	1001	1000	divergent responding	0				-1.0591		11.777
1	0011	0010	divergent responding	0				0.0012559		-0.29209
1	0010	1010	divergent responding	1				0.00086599		4.4811
1	0010	1010	divergent responding	1				-0.5949		-0.87425
1	1000	1100	divergent responding	0				0.1307		4.3409
1	1100	1000	divergent responding	0				-0.44127		-0.81231
1	0011	0010	divergent responding	0				-2.7802		-1.4916
1	0001	0011	divergent responding	0				-0.0032851		1.3983
1	1000	1100	divergent responding	0				-0.97068		-0.13085
1	1000	1100	divergent responding	0				0.37173		2.0744
1	1100	0100	divergent responding	-1				0.01415		0.27179
								0.47872		-0.11276
								0.51321		10.977
								0.51321		10.977
								0.13556		2.4385
								0.26885		4.2591
								-0.011373		11.629
								-1.0779		0.75627
								1.2214		3.3087
								-0.23516		17.12
								0.00092351		19.142
								-26.686		330.33
								9.0593		9.5773
								0.0058324		-1.2523
								-2.5637		0.26452
								0.76632		102.81
								-0.42467		-0.14057
								2.4326		1.859
								11.029		3.2942
								-9.5187		839.33
								3.6145		7.9096
								-0.5661		-0.078674
								3.3921		0.30781
								-0.076951		5.7329
								-0.11337		0.029063
								-0.44977		1.2419
								0.56632		0.68212
								-0.41264		0.54449
								3.9204		1.6568
								5.6373		2.9973
								-1.5582		38.838
								-0.10813		0.10715
								0.23327		0.22664
								-0.10592		8.0163
								1.7852		18.445
								-0.067694		0.63082
								16.629		5.1438
								-5.493		39.076
								-0.55168		24.988
								-0.16977		0.2501
								3.5075		28.293
								-0.066774		0.1802
								-1.2324		5.5073
								-0.27327		0.56781
								0.022348		9.8242
								-0.0056576		3.2633
								13.17		2.9328
								-0.64811		19.407
								0.12078		14.133
								0.17657		6.2824
								1.2693		10.628
								0.0022316		0.2121
								1.7319		14.827
								-3.2226		5.2849
								-0.81604		0.010497
								-0.0013323		0.57754
								9.8595		2.5719
								0.56237		0.42271
								0.19367		0.17935
								-0.54649		4.3555
								-1.7165		1.0593
								0.12968		-0.32691
								-0.11185		-0.02274
								-1.8864		2.15
								-1.2355		0.10502
								0.29003		18.963
								0.13127		8.9528
								-0.70779		3.4504
								0.00096841		1.2805
								1.7254		2.9954
								-1.0213		1.1416
								0.97823		0.68825
								0.020436		0.00067742
								-0.017039		2.9511
								-1.6427		1.4425
								-0.18244		4.4291
								-0.29279		0.017574
								-1.4049		1.9899
								-0.0064586		15.394
								0.026997		1.4488
								-0.45503		0.12105
								-0.28831		0.35236
								0.24294		30.261
								-0.48095		-0.013904
								0.039005		6.8942
								-0.44299		6.2259
								-0.01325		1.1136
								0.013495		-0.0038554
								0.0055665		-0.013118
								-0.012236		0.039004
								1.6496		-0.011406
								-0.73586		-0.1197
								-0.85866		10.468
								-1.5494		1.3131
								-1.8654		-1.1327
								0.10783		-0.63013
								-0.52733		0.25758
								-0.52548		0.18292
								-0.067853		-0.27344
								-1.2922		-2.51e-05
								-0.037025		1.2011
								-1.0922		-0.13145
								-0.87206		-0.18022
								0.70193		25.336
								0.017396		-1.6199
								2.4249		-0.50863
								0.43077		22.527
								-0.61784		0.46304
								-0.24919		0.94074
								-0.41175		-0.27159
								-0.18271		0.33526
								-1.6543		7.827
								-0.38387		-0.24534
								-0.48217		28.373
								-0.98793		0.14609
								-0.77318		-0.95299
								0.51741		3.9217
								-1.436		-0.00049215
								-0.34345		1.9553
								16.056		6.8525
								3.1846		0.070868
								314.25		1091
								39.824		621.38
								39.824		621.38
								32.702		17.217
								423.66		1387.7
								572.88		104.79
								136.31		107.37
								21.307		52.733
								21.307		52.733
								375.4		161.97
								142.18		39.543
								276.79		469.6
								113.31		65.299
								93.93		14.912
								116.07		20.348
								56.596		174.4
								77.404		148.9
								65.065		105.03
								112.56		190.59
								100.43		26.368
								75.186		135.72
								42.616		21.079
								144.86		72.879
								144.86		72.879
								6.1203		5.3629
								16.864		14.952
								13.904		0.89789
								11.695		21.607
								10.717		0.68451
								17.996		4.1637
								339.77		963.69
								16.198		15.706
								100.79		115.04
								790.8		1374
								471.44		821.29
								60.632		130.21
								69.918		40.439
								1.8758		21.134
								13.42		106.47
								447.4		62.79
								65.67		21.342
								242.05		94.323
								-0.11518		44.94
								0.023189		0.93345
								4.5807		23.511
								3.5817		-1.3865
								4.3011		32.027
								1.996		28.533
								4.428		85.375
								38.413		8.7371
								0.0056233		-0.0011703
								5.299		68.581
								0.65364		-0.4071
								0.18582		2.5307
								1.7242		44.444
								98.181		18.524
								98.181		18.524
								1.4576		1.9165
								58.458		7.332
								27.168		0.55487
								-0.017153		-0.013386
								6.1334		8.8804
								0.12371		20.269
								11.559		0.55439
								370.2		47.389
								39.824		1.2493
								42.131		0.18806
								-0.54058		8.6092
								-0.46356		27.708
								62.71		0.37987
								0.0055377		1.6905
								99.713		69.405
								2.8044		0.16057
								0.3811		27.822
								-0.48219		13.375
								3.1e-06		8.3551
								3.0708		0.17941
								-0.0018983		9.1352
								0.90106		2.522
								2.4319		13.803
								0.66763		-0.00052724
								2.0839		21.544
								6.9505		47.406
								4.0889		2.57
								3.9964		-0.048378
								-0.077733		-0.16604
								12.96		4.6891
								5.0715		1.0169
								-0.25357		-0.34052
								138.44		0.7448
								4.81		0.033673
								0.80077		-0.13493
								0.015608		0.080381
								-0.22278		-0.29336
								0.17122		1.4477
								1.3174		2.4944
								-0.72453		8.6063
								2.1391		-0.3183
								32.959		0.41986
								9.1568		1.8963
								-0.018536		0.12079
								1.1084		12.805
								-0.028775		2.9878
								0.0029288		-0.016631
								-0.1785		0.30031
								0.39215		3.4698
								0.11476		-0.059553
								-0.22703		1.2643
								2.5359		0.90022
								3.3		29.948
								1.5062		0.10666
								32.257		8.4591
								2.7399		2.8852
								-0.33528		0.013692
								5.3734		0.72349
								9.4688		1.2279
								0.73979		1.038
								-0.28962		0.75509
								39.879		5.703
								11.577		6.8292
								2.0324		4.0134
								1.3767		-0.0087761
								0.0016595		-0.09367
								4.5802		14.744
								33.031		12.958
								-0.90168		0.2242
								0.50359		-1.5445
								102.68		31.077
								0.82172		-0.36674
								16.342		22.818
								-0.33946		-0.22398
								41.524		6.8039
								120.9		25.031
								0.020891		0.03859
								-0.032711		0.40365
								0.33359		10.018
								46.571		10.222
								18.473		2.9572
								29.683		18.105
								3.2073		6.3377
								1.5337		0.68665
								0.22688		-0.7614
								24.026		0.271
								2.7659		-0.10915
								0.019695		-1.0772
								-0.12515		-0.66415
								-1.0158		-0.71984
								14.389		10.863
								-0.010389		0.011189
								0.55994		0.016333
								4.2376		6.3927
								82.367		17.936
								23.241		0.17818
								-0.098531		-0.88476
								-0.35252		0.068067
								-0.19388		-1.1084
								13.021		-0.46564
								2.8638		0.012723
								0.098186		3.7753
								21.864		-0.30947
								0.76435		-0.17668
								-0.014173		-1.6694
								0.11169		0.47936
								0.002098		-0.55598
								18.918		-0.061694
								0.18253		-0.13086
								-0.66598		-0.0080761
								1.8111		0.18488
								-2.5743		0.057571
								1.4059		2.428
								0.31113		6.9546
								1.9512		0.010002
								1.0899		3.3028
								1.3885		2.6054
								0.012843		0.77996
								33.976		0.93453
								8.0771		14.781
								-0.16064		-0.49437
								10.409		-0.67507
								0.23672		7.368
								-0.62223		20.349
								4.7127		-0.2587
								1.8212		0.021384
								-0.053958		-0.083421
								-0.086678		-0.21304
								0.061184		2.5017
								0.12464		-0.0076472
								0.77981		3.9459
								0.91924		0.76191
								0.47667		0.061696
								0.25479		-0.0032272
								1.064		-0.05264
								0.0062359		-1.1049
								-0.55447		-0.40375
								0.014714		0.023493
								-0.96966		-0.13589
								5.944		-0.0046858
								-0.092415		-0.020504
								33.278		7.4484
								-0.092415		-0.020504
								-0.092415		-0.020504
								0.70329		16.02
								0.081343		1.7217
								7.0259		-0.58526
								-0.91435		-0.5607
								5.7607		0.00010495
								17.642		9.1207
								-0.35517		-0.0611
								6.3124		1.7926
								4.197		12.81
								-0.0022212		2.9221
								4.8277		12.437
								-0.32531		-0.30651
								-0.030186		3.4368
								0.28162		-0.0016483
								0.34589		-0.022039
								4.0571		-0.11793
								1.3077		13.981
								1.4702		84.9
								-0.00058874		0.49143
								27.597		21.179
								-0.00013809		1.2518
								2.3331		29.435
								8.4507		5.6499
								25.052		3.8282
								11.265		7.4717
								-0.83587		2.4183
								0.65268		0.0002121
								10.516		5.297
								49.201		1.3468
								18.479		-0.47443
								29.191		23.035
								-1.8877		-0.69092
								1.7576		4.5401
								2.4676		0.24559
								-0.66699		11.726
								-0.82952		135.09
								12.494		52.969
								-0.0091227		4.4224
								11.057		41.253
								0.48568		11.666
								3.7575		18.088
								0.16612		33.373
								0.11909		32.591
								0.46209		23.519
								-0.39518		6.1031
								-0.02967		8.8707
								5.7299		32.706
								-0.089666		10.32
								26.13		140.11
								116.05		23.289
								26.35		160.39
								0.025179		4.8076
								5.3361		68.898
								22.252		1.858
								55.87		-1.0364
								10.767		1.1013
								18.024		71.195
								7.5016		0.12553
								12.334		50.842
								19.225		1.4045
								17.307		1.0594
								0.010709		-1.3805
								-0.066319		51.829
								5.4706		132.07
								-3.09		0.0046165
								0.90333		-1.3695
								-0.032869		-0.23989
								-0.26977		-0.16267
								3.739		1.0015
								24.096		1.1624
								1.2838		2.1381
								5.3462		6.3632
								-13.015		-1.1666
								3.0302		-0.1036
								-0.73163		-0.13426
								-0.79565		-0.48733
								2.1402		0.92129
								-1.4947		2.121
								-0.80382		-0.35821
								-11.468		-1.8047
								-2.7866		-0.55768
								-0.6762		1.478
								2.388		-0.0003032
								1.6412		-0.044699
								1.7271		5.742
								0.50818		0.62299
								93.18		84.057
								-19.313		-2.1159
								20.045		34.439
								-0.15744		0.010311
								0.098121		-0.50647
								-3.7426		-0.92897
								51.09		35.196
								0.055514		-0.42466
								-0.03671		0.33716
								0.050877		-1.3197
								0.015229		2.1279
								0.096481		-0.068847
								0.63366		-0.13059
								-0.22522		-2.3541
								-0.32621		8.6662
								-3.2746		1.1714
								5.0682		-1.1246
								0.74203		14.5
								0.45511		0.16707
								-0.24663		2.0952
								0.21337		-0.02645
								2040.7		1385.1
								-0.88715		0.5887
								6.075		0.040268
								1.0287		0.50698
								17.341		21.293
								-0.59928		0.31128
								-0.049872		2.791
								-4.7371		-1.1645
								-0.71369		0.059355
								0.31273		-0.032393
								-0.82221		-1.2347
								0.0032218		2.4817
								-1.0189		27.007
								-0.98433		1.3573
								-0.14907		0.94906
								-2.983		3.1075
								0.11252		-0.68145
								-4.8145		-2.0824
								4.0377		-0.003204
								0.10604		-1.313
								153.79		30.202
								0.85894		0.0036352
								6.3296		5.3848
								-0.07028		0.14476
								-4.5696		-4.0185
								-0.015029		-1.4485
								0.19136		-0.85864
								-1.871		0.51538
								4.7157		-0.47344
								83.196		27.688
								17.665		3.6055
								-1.2813		-0.48637
								6.4837		-0.87539
								-2.3504		-0.048266
								18.743		83.68
								-0.0011444		18.907
								0.3409		10.671
								0.4328		0.19834
								0.0039863		-0.034608
								-1.1587		0.094342
								0.30834		1.6696
								-0.06379		0.02782
								-5.3354		8.8291
								-1.3283		0.1115
								-1.3127		2.5364
								-0.47578		-0.15282
								-1.3342		4.0835
								-2.7258		-2.8065
								8.2258		6.6733
								-0.14646		-0.90815
								1.8735		1.0206
								0.30141		2.2307
								1.0017		19.834
								-0.63092		4.0352
								6.5567		1.2333
								0.9341		-1.0885
								-0.028665		-0.013689
								-0.00042392		7.1294
								0.57809		10.468
								-0.025652		-0.091621
								-1.7387		1.1646
								-0.47725		-1.4914
								0.31742		2.7642
								-1.5098		2.0931
								-1.1092		0.028905
								-9.23e-05		1.2991
								-2.9993		0.71928
								0.18972		11.495
								0.61131		9.9703
								-0.75806		2.5298
								1.7603		0.075223
								0.046738		-0.043736
								0.50216		-0.0026113
								-2.5841		0.21932
								-1.5259		-0.11623
								-0.029564		0.40203
								-6.4188		-1.8842
								2.3593		18.448
								4.1471		10.899
								-1.6368		-0.11318
								22.989		20.751
								-0.24477		0.093755
								-2.1114		3.0229
								1.3497		0.37601
								0.095703		-0.28412
								0.070499		8.8419
								0.87133		1.2475
								-0.2054		-1.3413
								-0.28008		17.293
								0.69509		1.5324
								0.15917		-0.052857
								-0.061299		2.5544
								-3.3703		0.010514
								-1.626		4.0767
								-3.1501		-2.3681
								0.026872		-1.2419
								0.073305		-0.19201
								-1.9748		1.3282
								8.1963		0.76921
								-0.13768		0.13315
								23.428		21.226
								-0.36821		0.21437
								-0.30867		-0.85985
								-0.45592		3.9931
								0.075038		8.4827
								0.075038		8.4827
								-0.32089		-1.1845
								0.050468		-0.44479
								-4.4248		0.21668
								-0.76936		-0.98076
								-0.99964		1.1375
								-0.25271		0.57584
								13.387		2.7498
								-0.75639		-0.0094
								-0.38785		5.146
								-0.11657		0.40595
								-0.85613		-0.0090106
								0.48091		-0.14194
								-0.089176		1.8593
								-0.77948		0.62752
								0.014406		7.8292
								13.404		0.21834
								-0.031385		6.0967
								0.65168		15.23
								-2.1242		-0.0030146
								0.0034243		-0.0058641
								0.39754		4.8201
								4.6417		15.842
								7.4813		1.9832
								-0.37338		2.688
								-0.025428		0.0193
								-1.8382		0.023747
								2.0892		16.256
								-0.44408		9.712
								-0.067228		0.069529
								5.8581		2.537
								-0.53564		5.96
								-0.79575		0.056114
								16.674		23.349
								-1.1879		1.0017
								2.192		2.1308
								-0.69484		0.67736
								-0.05085		0.12115
								1.4821		4.7363
								0.54236		-0.043127
								0.43018		-0.55605
								2.5035		-0.0020279
								-0.14565		-0.23231
								-0.50981		1.3157
								-0.070713		-0.056691
								-1.2761		3.8959
								-0.021333		-0.42276
								0.064627		0.00020521
								0.72339		2.0869
								0.33054		1.5767
								0.90361		0.38289
								-0.15107		1.3699
								12.227		2.4642
								-0.16593		1.9916
								-0.32979		-0.77918
								-0.37068		0.68273
								-0.37068		0.68273
								-0.20235		2.15e-05
								-2.2767		0.36341
								-1.1736		8.492
								-1.6583		-0.088498
								-0.80521		-1.3218
								-0.037363		2.0076
								-0.20235		2.15e-05
								2.0162		-0.44546
								-0.091491		1.6192
								-0.6932		-0.2181
								-0.85092		0.49004
								1.1803		0.36722
								-1.0915		-0.11855
								-0.087664		1.4879
								2.4758		4.4631
								14.715		0.66835
								-0.4029		0.85444
								2.7679		1.9828
								-1.0604		0.00017143
								-1.8257		0.14589
								0.0057776		-1.074
								-0.51529		23.043
								0.087818		71.317
								0.0031775		0.014125
								-0.29732		-0.77271
								-0.46828		0.24749
								-0.91103		-0.21922
								0.32559		0.19296
								0.45634		0.00060015
								-0.5934		-0.13205
								-1.1341		-0.17196
								16.84		7.6789
								-0.0013537		-1.0171
								-0.42422		0.1445
								0.0056114		17.753
								8.6315		0.55717
								1.3967		3.4566
								-0.0035221		0.0025974
								1.2509		2.8494
								0.11041		1.4733
								-0.28346		1.865
								-0.040416		5.54
								1.0225		2.7356
								0.0025199		1.4375
								-0.61066		0.055715
								-0.12099		5.8682
								-0.19376		0.056761
								-0.70363		0.10154
								-0.63696		0.18167
								70.241		85.15
								-0.34814		-0.090598
								-1.153		-0.0056252
								0.011055		0.37051
								0.26142		1.2338
								0.013243		-0.80482
								55.962		67.47
								-0.12275		3.7349
								-1.6506		-0.51418
								-1.6643		-0.018576
								-0.11243		-0.090908
								-0.044091		0.27653
								-1.2733		0.00016003
								-0.29378		0.46125
								-0.39757		-1.5991
								-0.093354		0.017174
								1.3802		-0.18985
								-0.19083		2.2962
								9.7438		2.4327
								0.035286		0.9867
								-0.036044		-0.061552
								7.7916		12.319
								-0.031501		11.063
								2.4051		2.6457
								-1.3394		-0.017988
								-1.0317		7.3383
								-0.00279		0.64371
								-0.0044116		0.11343
								0.017776		1.1666
								-1.1506		0.0074606
								-0.016676		-0.55229
								-2.1113		0.0022267
								1.4414		1.3212
								-0.23997		-0.1458
								-0.54067		-0.87826
								3.9244		-0.68508
								0.0076278		-0.0020802
								-0.00097324		0.57191
								-1.7421		0.0055689
								-0.34816		0.92178
								-0.63087		-1.1268
								-2.4507		0.149
								-0.12179		-0.085435
								39.232		0.34441
								-0.69218		-0.20057
								1.3553		-1.1018
								-0.018862		-0.037721
								-0.44372		13.138
								-0.44372		13.138
								1.0469		12.753
								0.078		5.0299
								-1.1344		0.19308
								0.73307		-0.016155
								-0.15287		1.7884
								-0.029704		0.003061
								7.2208		12.431
								-1.1777		-0.87048
								0.085611		1.1201
								5.228		1.5124
								-0.030239		-0.82988
								-1.3839		0.00023916
								-0.13529		1.5824
								-0.2143		0.016636
								-0.49695		-0.059929
								-0.55268		-0.064493
								-1.344		2.0502
								-0.014329		0.3106
								-0.80532		-0.21656
								-0.29238		-0.19969
								-1.7085		0.26977
								-0.025376		-0.33772
								-0.013545		0.90541
								1.0894		0.06725
								-1.342		-0.066654
								-0.080893		-0.30776
								-0.00078819		0.13074
								0.3427		0.15177
								6.2259		0.47057
								-0.35169		0.27714
								-0.44268		-0.003842
								-0.10283		5.9475
								0.028262		1.0183
								-0.51846		0.65116
								0.4108		-0.022372
								16.922		9.9652
								24.784		58.48
								1.1847		0.0010211
								2938.8		1969.9
								11.433		14.353
								6.0834		-0.015251
								-0.61765		5.0827
								0.087325		-0.025333
								0.00070064		0.068757
								0.33275		1.5
								0.80914		-0.17558
								0.25442		-0.18057
								17.767		20.003
								24.85		6.2269
								-0.93293		-0.49037
								13.361		0.57563
								0.0026074		5.7567
								-2.0425		0.74143
								-0.6298		34.983
								8.5724		-0.067671
								-0.36659		8.3586
								57.689		176.42
								0.004251		-0.1461
								1.2007		-0.013142
								0.43888		1.0056
								0.013814		0.98984
								0.45791		-0.055867
								-0.14121		-2.654
								0.00014929		-0.46078
								-0.030955		7.7657
								-0.73887		0.20918
								-0.041801		-0.0048885
								-0.64233		4.5395
								4.6384		4.4351
								-0.69957		1.5441
								-0.70152		20.245
								-0.41414		0.67441
								-0.1088		-0.19132
								-0.27616		-0.12101
								3.2509		4.9772
								-0.29046		-0.024619
								0.050259		3.7875
								2.8111		1.8353
								-0.2816		0.11918
								3.1978		-0.17763
								-4.4107		-0.10338
								1.6106		-0.27392
								-0.54997		8.4168
								-1.442		1.2131
								0.5104		7.0578
								-0.26042		0.63502
								0.0013929		-0.74526
								-0.10375		-1.2063
								1.7522		3.2389
								0.53456		0.19855
								-0.87194		-0.35516
								0.70713		-0.35381
								2.1672		-0.49226
								0.016449		-0.073492
								-0.2063		0.092069
								-0.39866		-0.30549
								-0.013037		-0.077853
								0.021345		-1.3581
								-1.452		0.041666
								-0.17806		-0.14807
								-0.32811		-0.015299
								-0.31638		0.37036
								-0.93642		-0.049325
								-0.022825		1.3988
								-0.51654		-1.7357
								15.014		1.1662
								0.66251		4.8563
								1.0905		0.13448
								70.871		-0.21231
								-1.4969		0.017052
								0.1426		0.56885
								0.67765		0.38232
								0.46424		-0.13099
								0.46544		9.891
								44.817		61.15
								13.712		38.371
								0.28908		53.011
								52.28		54.215
								276.82		119.49
								280.18		109.98
								91.313		3.5797
								85.591		3.0851
								0.27085		155.42
								-0.00041198		28.655
								3.0651		2.8147
								6.6904		109.15
								33.17		23.457
								50.709		450.34
								0.9348		40.806
								66.87		18.785
								37.187		81.712
								82.324		52.773
								486.09		164.99
								9.2675		10.318
								13.387		28.87
								32.846		27.191
								0.16992		62.376
								10.826		262.1
								-0.016348		42.673
								0.30421		21.141
								16.956		30.353
								12.073		12.16
								830.91		1011
								0.10368		2.1875
								7.6031		26.578
								5.7157		25.079
								2.1031		4.3722
								118.92		52.732
								4.8419		0.79028
								-0.25045		19.076
								0.21545		4.5649
								9.7722		22.092
								51.698		18.599
								149.19		15.425
								1.9513		108.32
								-2.6807		12.638
								0.20475		24.776
								919.47		198.53
								0.63342		6.8899
								25.287		16.26
								128.18		26.292
								0.0060647		0.99923
								615.58		113.46
								2.5318		0.90718
								8.446		2.8629
								2.3096		0.24668
								-2.0598		4.4671
								8.0189		0.4204
								7.0171		11.22
								864.99		314.14
								32.819		247.37
								0.20481		-0.43466
								51.147		1.7148
								0.076924		43.454
								40.313		21.842
								3.9159		24.446
								202.7		290.1
								-0.53092		0.97317
								384.07		82.727
								-0.48098		13.658
								101.68		131.3
								-0.74477		18.661
								171.15		20.597
								1.9683		11.305
								-1.0014		3.2312
								60.323		16.969
								0.0023695		11.951
								-0.11132		78.615
								68.667		73.677
								1.0592		3.1767
								6.279		1.0161
								0.16599		-0.012192
								185.38		42.21
								-0.0036295		13.532
								2.7616		4.9653
								182.38		35.945
								-0.088762		30.345
								0.39363		28.922
								0.94689		29.62
								-0.48706		5.1315
								2.0124		11.889
								-3.2419		2.1786
								6.7499		1.0477
								21.213		41.865
								-0.46053		11.718
								0.022908		3.1151
								3.2161		4.1356
								2.1928		2.36
								0.34703		1.7555
								2.2651		25.069
								4.7267		8.6976
								-0.60994		5.9958
								4.2594		3.9473
								17.093		23.886
								0.012345		5.7852
								-0.29738		13.958
								0.61582		22.539
								-0.0022402		38.082
								0.17758		2.0676
								0.14453		0.0093669
								-4.254		13.854
								38.047		9.1765
								0.20625		-0.025472
								9.846		31.213
								7.8174		2.2626
								3.5001		34.54
								-0.18747		0.4224
								11.175		167.06
								11.175		167.06
								-0.056323		0.24368
								5.808		0.48422
								-0.008303		6.9373
								12.871		0.97082
								2.3468		2.4466
								6.4479		0.13614
								26.156		16.264
								108.09		0.36177
								17.389		1.1509
								18.485		5.9758
								-0.011716		10.344
								-0.58221		0.62885
								2.3234		1.7462
								0.042412		11.525
								-0.50729		-0.43817
								2.3247		8.0398
								3.5145		5.0647
								1.9189		-0.88805
								2.0968		0.047032
								0.12928		0.00045812
								5.8314		0.36489
								65.819		11.056
								-0.057548		1.2944
								7.6135		3.6661
								-0.78365		0.0040598
								0.28044		3.2457
								1.3372		8.1888
								2.5644		4.4868
								-0.78038		8.2035
								-0.11566		-0.03649
								42.437		23.305
								0.049393		1.634
								0.32743		8.7575
								0.0066725		0.012416
								2.7522		11.521
								-0.51231		11.915
								0.75958		9.3624
								49.534		39.049
								4.1722		0.52001
								0.060865		-0.69668
								0.054314		0.63832
								13.369		13.501
								11.044		1.5688
								9.1256		0.011878
								0.63034		2.1238
								0.013242		3.0929
								0.70224		0.63155
								14.792		3.1912
								0.77116		-0.13646
								4.1791		2.5146
								0.10977		-0.2676
								0.52255		0.053289
								48.963		53.699
								1.8428		-0.13813
								-0.089025		2.6701
								2.7386		196.52
								10.923		331.09
								0.0087099		9.7918
								1.2789		0.26165
								1.1916		43.821
								1.0087		39.446
								321.68		69.084
								-0.025928		0.45739
								-0.15724		0.63204
								0.054583		0.39786
								4.0117		2.0045
								10.232		40.639
								105.65		167.09
								6.2903		-0.009519
								2.2235		0.16952
								39.635		419.23
								47.009		15.838
								0.045208		0.23132
								18.67		0.43329
								0.2155		1.9703
								-0.70852		4.2147
								0.51083		20.462
								-0.059297		20.628
								-0.08594		2.9592
								0.37908		2.1366
								0.46884		27.985
								6.5412		55.157
								0.12995		9.8273
								-0.33156		2.4711
								81.908		158.74
								15.195		4.4839
								1.6191		1.9628
								0.54259		0.010969
								-0.010029		1.8447
								-0.84221		8.7928
								100.37		41.921
								15.735		118.84
								6.6504		32.558
								-0.092344		3.1593
								2.3878		0.20418
								2.074		21.468
								-0.0034647		2.7739
								-0.17857		-1.1509
								7.6024		1.1718
								34.373		15.178
								-0.053607		0.0042321
								0.21409		0.33448
								0.78705		2.1324
								1.5159		3.4316
								3.6575		4.0579
								-0.83104		8.0795
								-1.1142		3.0525
								9.9097		5.0607
								-0.25535		0.23669
								60.782		0.85536
								-0.20274		-0.00039396
								9.5553		69.692
								0.028608		-0.04967
								-0.051721		5.4678
								10.445		0.77213
								0.0024304		-0.19737
								7.8708		2.782
								4.5782		-0.33071
								0.18614		0.055309
								13.932		0.98356
								9.8128		3.6227
								-0.16227		0.5134
								0.39017		-0.099965
								0.027359		1.9571
								9.4901		0.47358
								0.015831		26.249
								12.051		212.55
								0.95419		1.5589
								13.223		6.9313
								-0.73411		5.6133
								-0.11173		4.6754
								13.011		23.681
								1.5213		-0.63538
								0.69796		23.526
								98.825		134.8
								-0.46109		0.43503
								4.3819		3.6012
								78.634		53.09
								78.634		53.09
								0.87809		-0.087882
								0.010585		4.8296
								1.1154		72.693
								2.5551		6.0358
								-0.82624		0.7831
								-0.72753		0.15086
								-0.059319		0.10799
								1.7526		0.53512
								-0.31116		5.6353
								-0.58458		-0.64748
								0.12909		2925.9

## Sheet: Sheet3
terms	OMIC gene counts		tumor specific responding	61		normal specific responding	76		no responding	39		consistent responding	10		divergent responding	55
tumor specific responding	61		tumor specific responding	49		normal specific responding	46		no responding	38		consistent responding	7		divergent responding	52
tumor specific responding	24		tumor specific responding	35		normal specific responding	39		no responding	33		consistent responding	5		divergent responding	52
tumor specific responding	3		tumor specific responding	35		normal specific responding	28		no responding	33		consistent responding	5		divergent responding	44
tumor specific responding	4		tumor specific responding	33		normal specific responding	28		no responding	30		consistent responding	4		divergent responding	38
tumor specific responding	22		tumor specific responding	33		normal specific responding	28		no responding	27		consistent responding	4		divergent responding	38
tumor specific responding	3		tumor specific responding	32		normal specific responding	25		no responding	26		consistent responding	4		divergent responding	37
tumor specific responding	19		tumor specific responding	29		normal specific responding	24		no responding	24		consistent responding	3		divergent responding	35
tumor specific responding	6		tumor specific responding	27		normal specific responding	23		no responding	24		consistent responding	3		divergent responding	34
tumor specific responding	18		tumor specific responding	27		normal specific responding	22		no responding	23		consistent responding	3		divergent responding	31
tumor specific responding	16		tumor specific responding	27		normal specific responding	22		no responding	21		consistent responding	2		divergent responding	31
tumor specific responding	5		tumor specific responding	26		normal specific responding	22		no responding	20		consistent responding	2		divergent responding	30
tumor specific responding	26		tumor specific responding	26		normal specific responding	19		no responding	20		consistent responding	2		divergent responding	28
tumor specific responding	19		tumor specific responding	24		normal specific responding	18		no responding	18		consistent responding	2		divergent responding	27
tumor specific responding	33		tumor specific responding	23		normal specific responding	15		no responding	17		consistent responding	2		divergent responding	26
tumor specific responding	19		tumor specific responding	23		normal specific responding	15		no responding	17		consistent responding	2		divergent responding	25
tumor specific responding	27		tumor specific responding	23		normal specific responding	14		no responding	16		consistent responding	2		divergent responding	24
tumor specific responding	7		tumor specific responding	23		normal specific responding	12		no responding	16		consistent responding	1		divergent responding	23
tumor specific responding	6		tumor specific responding	23		normal specific responding	12		no responding	15		consistent responding	1		divergent responding	22
tumor specific responding	27		tumor specific responding	22		normal specific responding	12		no responding	15		consistent responding	0		divergent responding	22
tumor specific responding	27		tumor specific responding	21		normal specific responding	12		no responding	15		consistent responding	0		divergent responding	21
tumor specific responding	17		tumor specific responding	21		normal specific responding	12		no responding	15		consistent responding	0		divergent responding	21
tumor specific responding	23		tumor specific responding	21		normal specific responding	11		no responding	14		consistent responding	0		divergent responding	21
tumor specific responding	23		tumor specific responding	19		normal specific responding	11		no responding	14		consistent responding	0		divergent responding	20
tumor specific responding	12		tumor specific responding	19		normal specific responding	10		no responding	13		consistent responding	0		divergent responding	20
tumor specific responding	10		tumor specific responding	19		normal specific responding	10		no responding	13		consistent responding	0		divergent responding	19
tumor specific responding	14		tumor specific responding	18		normal specific responding	10		no responding	13					divergent responding	19
tumor specific responding	8		tumor specific responding	18		normal specific responding	10		no responding	12					divergent responding	19
tumor specific responding	2		tumor specific responding	18		normal specific responding	9		no responding	12					divergent responding	18
tumor specific responding	3		tumor specific responding	18		normal specific responding	9		no responding	12					divergent responding	17
tumor specific responding	15		tumor specific responding	17		normal specific responding	9		no responding	11					divergent responding	17
tumor specific responding	1		tumor specific responding	16		normal specific responding	9		no responding	11					divergent responding	16
tumor specific responding	16		tumor specific responding	16		normal specific responding	9		no responding	11					divergent responding	16
tumor specific responding	16		tumor specific responding	16		normal specific responding	9		no responding	11					divergent responding	15
tumor specific responding	3		tumor specific responding	16		normal specific responding	9		no responding	11					divergent responding	15
tumor specific responding	26		tumor specific responding	16		normal specific responding	9		no responding	10					divergent responding	15
tumor specific responding	16		tumor specific responding	15		normal specific responding	8		no responding	10					divergent responding	15
tumor specific responding	7		tumor specific responding	15		normal specific responding	8		no responding	10					divergent responding	15
tumor specific responding	1		tumor specific responding	14		normal specific responding	8		no responding	10					divergent responding	14
tumor specific responding	4		tumor specific responding	14		normal specific responding	8		no responding	10					divergent responding	14
tumor specific responding	4		tumor specific responding	14		normal specific responding	8		no responding	10					divergent responding	14
tumor specific responding	18		tumor specific responding	14		normal specific responding	8		no responding	9					divergent responding	14
tumor specific responding	5		tumor specific responding	14		normal specific responding	7		no responding	9					divergent responding	13
tumor specific responding	5		tumor specific responding	13		normal specific responding	7		no responding	9					divergent responding	12
tumor specific responding	11		tumor specific responding	13		normal specific responding	7		no responding	9					divergent responding	12
tumor specific responding	4		tumor specific responding	12		normal specific responding	7		no responding	9					divergent responding	12
tumor specific responding	1		tumor specific responding	12		normal specific responding	7		no responding	9					divergent responding	12
tumor specific responding	4		tumor specific responding	12		normal specific responding	7		no responding	9					divergent responding	11
tumor specific responding	9		tumor specific responding	11		normal specific responding	7		no responding	9					divergent responding	11
tumor specific responding	10		tumor specific responding	11		normal specific responding	6		no responding	9					divergent responding	11
tumor specific responding	18		tumor specific responding	11		normal specific responding	6		no responding	9					divergent responding	11
tumor specific responding	3		tumor specific responding	11		normal specific responding	6		no responding	9					divergent responding	11
tumor specific responding	2		tumor specific responding	11		normal specific responding	6		no responding	9					divergent responding	10
tumor specific responding	3		tumor specific responding	10		normal specific responding	6		no responding	9					divergent responding	10
tumor specific responding	4		tumor specific responding	10		normal specific responding	6		no responding	9					divergent responding	10
tumor specific responding	1		tumor specific responding	10		normal specific responding	6		no responding	8					divergent responding	10
tumor specific responding	1		tumor specific responding	10		normal specific responding	6		no responding	8					divergent responding	10
tumor specific responding	5		tumor specific responding	10		normal specific responding	6		no responding	8					divergent responding	10
tumor specific responding	4		tumor specific responding	10		normal specific responding	5		no responding	8					divergent responding	9
tumor specific responding	8		tumor specific responding	10		normal specific responding	5		no responding	8					divergent responding	9
tumor specific responding	4		tumor specific responding	9		normal specific responding	5		no responding	8					divergent responding	9
tumor specific responding	2		tumor specific responding	9		normal specific responding	5		no responding	8					divergent responding	9
tumor specific responding	4		tumor specific responding	9		normal specific responding	5		no responding	7					divergent responding	9
tumor specific responding	4		tumor specific responding	9		normal specific responding	5		no responding	7					divergent responding	9
tumor specific responding	8		tumor specific responding	9		normal specific responding	5		no responding	7					divergent responding	9
tumor specific responding	3		tumor specific responding	9		normal specific responding	5		no responding	7					divergent responding	9
tumor specific responding	14		tumor specific responding	9		normal specific responding	5		no responding	7					divergent responding	8
tumor specific responding	4		tumor specific responding	9		normal specific responding	5		no responding	7					divergent responding	8
tumor specific responding	0		tumor specific responding	9		normal specific responding	5		no responding	7					divergent responding	8
tumor specific responding	3		tumor specific responding	8		normal specific responding	4		no responding	7					divergent responding	8
tumor specific responding	14		tumor specific responding	8		normal specific responding	4		no responding	7					divergent responding	8
tumor specific responding	3		tumor specific responding	8		normal specific responding	4		no responding	7					divergent responding	8
tumor specific responding	8		tumor specific responding	8		normal specific responding	4		no responding	7					divergent responding	8
tumor specific responding	8		tumor specific responding	8		normal specific responding	4		no responding	7					divergent responding	8
tumor specific responding	3		tumor specific responding	8		normal specific responding	4		no responding	6					divergent responding	8
tumor specific responding	6		tumor specific responding	8		normal specific responding	4		no responding	6					divergent responding	8
tumor specific responding	0		tumor specific responding	8		normal specific responding	4		no responding	6					divergent responding	8
tumor specific responding	2		tumor specific responding	8		normal specific responding	4		no responding	6					divergent responding	7
tumor specific responding	2		tumor specific responding	8		normal specific responding	4		no responding	6					divergent responding	7
tumor specific responding	1		tumor specific responding	8		normal specific responding	4		no responding	6					divergent responding	7
tumor specific responding	7		tumor specific responding	8		normal specific responding	4		no responding	6					divergent responding	7
tumor specific responding	6		tumor specific responding	8		normal specific responding	4		no responding	6					divergent responding	7
tumor specific responding	5		tumor specific responding	8		normal specific responding	4		no responding	6					divergent responding	7
tumor specific responding	6		tumor specific responding	8		normal specific responding	3		no responding	6					divergent responding	7
tumor specific responding	0		tumor specific responding	8		normal specific responding	3		no responding	6					divergent responding	7
tumor specific responding	8		tumor specific responding	8		normal specific responding	3		no responding	6					divergent responding	7
tumor specific responding	3		tumor specific responding	8		normal specific responding	3		no responding	6					divergent responding	7
tumor specific responding	11		tumor specific responding	8		normal specific responding	3		no responding	5					divergent responding	6
tumor specific responding	3		tumor specific responding	8		normal specific responding	3		no responding	5					divergent responding	6
tumor specific responding	7		tumor specific responding	7		normal specific responding	3		no responding	5					divergent responding	6
tumor specific responding	6		tumor specific responding	7		normal specific responding	3		no responding	5					divergent responding	6
tumor specific responding	2		tumor specific responding	7		normal specific responding	3		no responding	5					divergent responding	6
tumor specific responding	2		tumor specific responding	7		normal specific responding	3		no responding	5					divergent responding	6
tumor specific responding	4		tumor specific responding	7		normal specific responding	3		no responding	5					divergent responding	6
tumor specific responding	2		tumor specific responding	7		normal specific responding	3		no responding	5					divergent responding	6
tumor specific responding	7		tumor specific responding	7		normal specific responding	3		no responding	5					divergent responding	6
tumor specific responding	6		tumor specific responding	7		normal specific responding	3		no responding	5					divergent responding	6
tumor specific responding	7		tumor specific responding	7		normal specific responding	3		no responding	5					divergent responding	6
tumor specific responding	14		tumor specific responding	7		normal specific responding	3		no responding	5					divergent responding	5
tumor specific responding	3		tumor specific responding	7		normal specific responding	3		no responding	5					divergent responding	5
tumor specific responding	2		tumor specific responding	7		normal specific responding	3		no responding	5					divergent responding	5
tumor specific responding	2		tumor specific responding	7		normal specific responding	3		no responding	5					divergent responding	5
tumor specific responding	3		tumor specific responding	7		normal specific responding	3		no responding	5					divergent responding	5
tumor specific responding	5		tumor specific responding	7		normal specific responding	3		no responding	5					divergent responding	5
tumor specific responding	9		tumor specific responding	7		normal specific responding	2		no responding	5					divergent responding	5
tumor specific responding	1		tumor specific responding	7		normal specific responding	2		no responding	5					divergent responding	5
tumor specific responding	0		tumor specific responding	6		normal specific responding	2		no responding	5					divergent responding	5
tumor specific responding	5		tumor specific responding	6		normal specific responding	2		no responding	5					divergent responding	5
tumor specific responding	1		tumor specific responding	6		normal specific responding	2		no responding	5					divergent responding	5
tumor specific responding	0		tumor specific responding	6		normal specific responding	2		no responding	4					divergent responding	5
tumor specific responding	1		tumor specific responding	6		normal specific responding	2		no responding	4					divergent responding	5
tumor specific responding	6		tumor specific responding	6		normal specific responding	2		no responding	4					divergent responding	5
tumor specific responding	5		tumor specific responding	6		normal specific responding	2		no responding	4					divergent responding	5
tumor specific responding	0		tumor specific responding	6		normal specific responding	2		no responding	4					divergent responding	5
tumor specific responding	0		tumor specific responding	6		normal specific responding	2		no responding	4					divergent responding	4
tumor specific responding	4		tumor specific responding	6		normal specific responding	2		no responding	4					divergent responding	4
tumor specific responding	0		tumor specific responding	6		normal specific responding	2		no responding	4					divergent responding	4
tumor specific responding	6		tumor specific responding	6		normal specific responding	2		no responding	4					divergent responding	4
tumor specific responding	1		tumor specific responding	6		normal specific responding	2		no responding	4					divergent responding	4
tumor specific responding	2		tumor specific responding	6		normal specific responding	2		no responding	4					divergent responding	4
tumor specific responding	3		tumor specific responding	6		normal specific responding	2		no responding	4					divergent responding	4
tumor specific responding	2		tumor specific responding	6		normal specific responding	2		no responding	4					divergent responding	4
tumor specific responding	2		tumor specific responding	5		normal specific responding	2		no responding	4					divergent responding	4
tumor specific responding	0		tumor specific responding	5		normal specific responding	2		no responding	4					divergent responding	4
tumor specific responding	7		tumor specific responding	5		normal specific responding	2		no responding	4					divergent responding	4
tumor specific responding	10		tumor specific responding	5		normal specific responding	2		no responding	4					divergent responding	4
tumor specific responding	6		tumor specific responding	5		normal specific responding	2		no responding	4					divergent responding	4
tumor specific responding	2		tumor specific responding	5		normal specific responding	2		no responding	4					divergent responding	4
tumor specific responding	7		tumor specific responding	5		normal specific responding	2		no responding	4					divergent responding	4
tumor specific responding	0		tumor specific responding	5		normal specific responding	2		no responding	4					divergent responding	4
tumor specific responding	2		tumor specific responding	5		normal specific responding	2		no responding	4					divergent responding	3
tumor specific responding	0		tumor specific responding	5		normal specific responding	2		no responding	4					divergent responding	3
tumor specific responding	0		tumor specific responding	5		normal specific responding	2		no responding	4					divergent responding	3
tumor specific responding	2		tumor specific responding	5		normal specific responding	1		no responding	4					divergent responding	3
tumor specific responding	0		tumor specific responding	5		normal specific responding	1		no responding	4					divergent responding	3
tumor specific responding	3		tumor specific responding	5		normal specific responding	1		no responding	4					divergent responding	3
tumor specific responding	10		tumor specific responding	5		normal specific responding	1		no responding	4					divergent responding	3
tumor specific responding	3		tumor specific responding	5		normal specific responding	1		no responding	4					divergent responding	3
tumor specific responding	2		tumor specific responding	5		normal specific responding	1		no responding	3					divergent responding	3
tumor specific responding	0		tumor specific responding	5		normal specific responding	1		no responding	3					divergent responding	3
tumor specific responding	1		tumor specific responding	5		normal specific responding	1		no responding	3					divergent responding	3
tumor specific responding	4		tumor specific responding	5		normal specific responding	1		no responding	3					divergent responding	3
tumor specific responding	4		tumor specific responding	5		normal specific responding	1		no responding	3					divergent responding	3
tumor specific responding	5		tumor specific responding	5		normal specific responding	1		no responding	3					divergent responding	3
tumor specific responding	3		tumor specific responding	5		normal specific responding	1		no responding	3					divergent responding	3
tumor specific responding	5		tumor specific responding	5		normal specific responding	1		no responding	3					divergent responding	3
tumor specific responding	6		tumor specific responding	4		normal specific responding	1		no responding	3					divergent responding	3
tumor specific responding	0		tumor specific responding	4		normal specific responding	1		no responding	3					divergent responding	3
tumor specific responding	2		tumor specific responding	4		normal specific responding	1		no responding	3					divergent responding	3
tumor specific responding	0		tumor specific responding	4		normal specific responding	1		no responding	3					divergent responding	3
tumor specific responding	0		tumor specific responding	4		normal specific responding	1		no responding	3					divergent responding	3
tumor specific responding	3		tumor specific responding	4		normal specific responding	1		no responding	3					divergent responding	3
tumor specific responding	3		tumor specific responding	4		normal specific responding	1		no responding	3					divergent responding	2
tumor specific responding	0		tumor specific responding	4		normal specific responding	1		no responding	3					divergent responding	2
tumor specific responding	0		tumor specific responding	4		normal specific responding	1		no responding	3					divergent responding	2
tumor specific responding	7		tumor specific responding	4		normal specific responding	1		no responding	3					divergent responding	2
tumor specific responding	2		tumor specific responding	4		normal specific responding	1		no responding	3					divergent responding	2
tumor specific responding	2		tumor specific responding	4		normal specific responding	1		no responding	3					divergent responding	2
tumor specific responding	1		tumor specific responding	4		normal specific responding	1		no responding	3					divergent responding	2
tumor specific responding	7		tumor specific responding	4		normal specific responding	1		no responding	3					divergent responding	2
tumor specific responding	0		tumor specific responding	4		normal specific responding	1		no responding	3					divergent responding	2
tumor specific responding	2		tumor specific responding	4		normal specific responding	1		no responding	3					divergent responding	2
tumor specific responding	0		tumor specific responding	4		normal specific responding	1		no responding	3					divergent responding	2
tumor specific responding	3		tumor specific responding	4		normal specific responding	1		no responding	3					divergent responding	2
tumor specific responding	2		tumor specific responding	4		normal specific responding	1		no responding	3					divergent responding	2
tumor specific responding	3		tumor specific responding	4		normal specific responding	1		no responding	3					divergent responding	2
tumor specific responding	1		tumor specific responding	4		normal specific responding	1		no responding	3					divergent responding	2
tumor specific responding	0		tumor specific responding	4		normal specific responding	1		no responding	3					divergent responding	2
tumor specific responding	0		tumor specific responding	4		normal specific responding	1		no responding	3					divergent responding	2
tumor specific responding	0		tumor specific responding	4		normal specific responding	1		no responding	3					divergent responding	2
tumor specific responding	1		tumor specific responding	4		normal specific responding	1		no responding	3					divergent responding	2
tumor specific responding	0		tumor specific responding	4		normal specific responding	1		no responding	3					divergent responding	2
tumor specific responding	1		tumor specific responding	4		normal specific responding	1		no responding	3					divergent responding	2
tumor specific responding	1		tumor specific responding	4		normal specific responding	0		no responding	3					divergent responding	2
tumor specific responding	2		tumor specific responding	4		normal specific responding	0		no responding	3					divergent responding	2
tumor specific responding	5		tumor specific responding	4		normal specific responding	0		no responding	3					divergent responding	2
tumor specific responding	2		tumor specific responding	3		normal specific responding	0		no responding	3					divergent responding	2
tumor specific responding	0		tumor specific responding	3		normal specific responding	0		no responding	3					divergent responding	2
tumor specific responding	5		tumor specific responding	3		normal specific responding	0		no responding	3					divergent responding	2
tumor specific responding	0		tumor specific responding	3		normal specific responding	0		no responding	3					divergent responding	2
tumor specific responding	0		tumor specific responding	3		normal specific responding	0		no responding	3					divergent responding	2
tumor specific responding	2		tumor specific responding	3		normal specific responding	0		no responding	2					divergent responding	2
tumor specific responding	3		tumor specific responding	3		normal specific responding	0		no responding	2					divergent responding	2
tumor specific responding	2		tumor specific responding	3		normal specific responding	0		no responding	2					divergent responding	1
tumor specific responding	2		tumor specific responding	3		normal specific responding	0		no responding	2					divergent responding	1
tumor specific responding	5		tumor specific responding	3		normal specific responding	0		no responding	2					divergent responding	1
tumor specific responding	0		tumor specific responding	3		normal specific responding	0		no responding	2					divergent responding	1
tumor specific responding	2		tumor specific responding	3		normal specific responding	0		no responding	2					divergent responding	1
tumor specific responding	0		tumor specific responding	3		normal specific responding	0		no responding	2					divergent responding	1
tumor specific responding	1		tumor specific responding	3		normal specific responding	0		no responding	2					divergent responding	1
tumor specific responding	1		tumor specific responding	3		normal specific responding	0		no responding	2					divergent responding	1
tumor specific responding	0		tumor specific responding	3		normal specific responding	0		no responding	2					divergent responding	1
tumor specific responding	0		tumor specific responding	3		normal specific responding	0		no responding	2					divergent responding	1
tumor specific responding	2		tumor specific responding	3		normal specific responding	0		no responding	2					divergent responding	1
tumor specific responding	3		tumor specific responding	3		normal specific responding	0		no responding	2					divergent responding	1
tumor specific responding	0		tumor specific responding	3		normal specific responding	0		no responding	2					divergent responding	1
tumor specific responding	1		tumor specific responding	3		normal specific responding	0		no responding	2					divergent responding	1
tumor specific responding	0		tumor specific responding	3		normal specific responding	0		no responding	2					divergent responding	1
tumor specific responding	0		tumor specific responding	3		normal specific responding	0		no responding	2					divergent responding	1
tumor specific responding	0		tumor specific responding	3		normal specific responding	0		no responding	2					divergent responding	1
tumor specific responding	1		tumor specific responding	3		normal specific responding	0		no responding	2					divergent responding	1
tumor specific responding	0		tumor specific responding	3		normal specific responding	0		no responding	2					divergent responding	1
tumor specific responding	1		tumor specific responding	3		normal specific responding	0		no responding	2					divergent responding	1
tumor specific responding	0		tumor specific responding	3		normal specific responding	0		no responding	2					divergent responding	1
tumor specific responding	4		tumor specific responding	3		normal specific responding	0		no responding	2					divergent responding	1
tumor specific responding	1		tumor specific responding	3		normal specific responding	0		no responding	2					divergent responding	1
tumor specific responding	0		tumor specific responding	3		normal specific responding	0		no responding	2					divergent responding	1
tumor specific responding	2		tumor specific responding	3		normal specific responding	0		no responding	2					divergent responding	1
tumor specific responding	4		tumor specific responding	3		normal specific responding	0		no responding	2					divergent responding	1
tumor specific responding	0		tumor specific responding	3		normal specific responding	0		no responding	2					divergent responding	1
tumor specific responding	0		tumor specific responding	3		normal specific responding	0		no responding	2					divergent responding	0
tumor specific responding	2		tumor specific responding	3		normal specific responding	0		no responding	2					divergent responding	0
tumor specific responding	2		tumor specific responding	3		normal specific responding	0		no responding	2					divergent responding	0
tumor specific responding	1		tumor specific responding	3		normal specific responding	0		no responding	2					divergent responding	0
tumor specific responding	3		tumor specific responding	2					no responding	2					divergent responding	0
tumor specific responding	0		tumor specific responding	2					no responding	2					divergent responding	0
tumor specific responding	0		tumor specific responding	2					no responding	2					divergent responding	0
tumor specific responding	2		tumor specific responding	2					no responding	2					divergent responding	0
tumor specific responding	0		tumor specific responding	2					no responding	2					divergent responding	0
tumor specific responding	0		tumor specific responding	2					no responding	2					divergent responding	0
tumor specific responding	0		tumor specific responding	2					no responding	2					divergent responding	0
tumor specific responding	2		tumor specific responding	2					no responding	2					divergent responding	0
tumor specific responding	1		tumor specific responding	2					no responding	2					divergent responding	0
tumor specific responding	2		tumor specific responding	2					no responding	2					divergent responding	0
tumor specific responding	1		tumor specific responding	2					no responding	2					divergent responding	0
tumor specific responding	1		tumor specific responding	2					no responding	1					divergent responding	0
tumor specific responding	0		tumor specific responding	2					no responding	1					divergent responding	0
tumor specific responding	1		tumor specific responding	2					no responding	1					divergent responding	0
tumor specific responding	1		tumor specific responding	2					no responding	1					divergent responding	0
tumor specific responding	2		tumor specific responding	2					no responding	1					divergent responding	0
tumor specific responding	3		tumor specific responding	2					no responding	1					divergent responding	0
tumor specific responding	4		tumor specific responding	2					no responding	1					divergent responding	0
tumor specific responding	2		tumor specific responding	2					no responding	1					divergent responding	0
tumor specific responding	1		tumor specific responding	2					no responding	1					divergent responding	0
tumor specific responding	0		tumor specific responding	2					no responding	1					divergent responding	0
tumor specific responding	0		tumor specific responding	2					no responding	1					divergent responding	0
tumor specific responding	0		tumor specific responding	2					no responding	1					divergent responding	0
tumor specific responding	1		tumor specific responding	2					no responding	1					divergent responding	0
tumor specific responding	2		tumor specific responding	2					no responding	1					divergent responding	0
tumor specific responding	0		tumor specific responding	2					no responding	1					divergent responding	0
tumor specific responding	0		tumor specific responding	2					no responding	1
tumor specific responding	0		tumor specific responding	2					no responding	1
tumor specific responding	1		tumor specific responding	2					no responding	1
tumor specific responding	1		tumor specific responding	2					no responding	1
tumor specific responding	1		tumor specific responding	2					no responding	1
tumor specific responding	0		tumor specific responding	2					no responding	1
tumor specific responding	2		tumor specific responding	2					no responding	1
tumor specific responding	1		tumor specific responding	2					no responding	1
tumor specific responding	0		tumor specific responding	2					no responding	1
tumor specific responding	0		tumor specific responding	2					no responding	1
tumor specific responding	0		tumor specific responding	2					no responding	1
tumor specific responding	2		tumor specific responding	2					no responding	1
tumor specific responding	23		tumor specific responding	2					no responding	1
tumor specific responding	16		tumor specific responding	2					no responding	1
tumor specific responding	7		tumor specific responding	2					no responding	1
tumor specific responding	18		tumor specific responding	2					no responding	1
tumor specific responding	14		tumor specific responding	2					no responding	1
tumor specific responding	8		tumor specific responding	2					no responding	1
tumor specific responding	3		tumor specific responding	2					no responding	1
tumor specific responding	0		tumor specific responding	2					no responding	1
tumor specific responding	9		tumor specific responding	2					no responding	1
tumor specific responding	10		tumor specific responding	2					no responding	1
tumor specific responding	32		tumor specific responding	2					no responding	1
tumor specific responding	21		tumor specific responding	2					no responding	1
tumor specific responding	13		tumor specific responding	2					no responding	1
tumor specific responding	13		tumor specific responding	2					no responding	1
tumor specific responding	12		tumor specific responding	2					no responding	1
tumor specific responding	12		tumor specific responding	2					no responding	1
tumor specific responding	21		tumor specific responding	1					no responding	1
tumor specific responding	21		tumor specific responding	1					no responding	1
tumor specific responding	0		tumor specific responding	1					no responding	1
tumor specific responding	1		tumor specific responding	1					no responding	1
tumor specific responding	0		tumor specific responding	1					no responding	1
tumor specific responding	6		tumor specific responding	1					no responding	1
tumor specific responding	2		tumor specific responding	1					no responding	1
tumor specific responding	23		tumor specific responding	1					no responding	1
tumor specific responding	1		tumor specific responding	1					no responding	1
tumor specific responding	0		tumor specific responding	1					no responding	1
tumor specific responding	3		tumor specific responding	1					no responding	1
tumor specific responding	8		tumor specific responding	1					no responding	1
tumor specific responding	0		tumor specific responding	1					no responding	1
tumor specific responding	2		tumor specific responding	1					no responding	1
tumor specific responding	1		tumor specific responding	1					no responding	1
tumor specific responding	3		tumor specific responding	1					no responding	1
tumor specific responding	5		tumor specific responding	1					no responding	1
tumor specific responding	2		tumor specific responding	1					no responding	1
tumor specific responding	3		tumor specific responding	1					no responding	1
tumor specific responding	0		tumor specific responding	1					no responding	1
tumor specific responding	0		tumor specific responding	1					no responding	1
tumor specific responding	0		tumor specific responding	1					no responding	1
tumor specific responding	1		tumor specific responding	1					no responding	1
tumor specific responding	0		tumor specific responding	1					no responding	1
tumor specific responding	0		tumor specific responding	1					no responding	1
tumor specific responding	0		tumor specific responding	1					no responding	1
tumor specific responding	0		tumor specific responding	1					no responding	1
tumor specific responding	2		tumor specific responding	1					no responding	1
tumor specific responding	0		tumor specific responding	1					no responding	1
tumor specific responding	1		tumor specific responding	1					no responding	1
tumor specific responding	0		tumor specific responding	1					no responding	1
tumor specific responding	0		tumor specific responding	1					no responding	1
tumor specific responding	1		tumor specific responding	1					no responding	1
tumor specific responding	0		tumor specific responding	1					no responding	1
tumor specific responding	9		tumor specific responding	1					no responding	0
tumor specific responding	8		tumor specific responding	1					no responding	0
tumor specific responding	11		tumor specific responding	1					no responding	0
tumor specific responding	7		tumor specific responding	1					no responding	0
tumor specific responding	8		tumor specific responding	1					no responding	0
tumor specific responding	8		tumor specific responding	1					no responding	0
tumor specific responding	11		tumor specific responding	1					no responding	0
tumor specific responding	3		tumor specific responding	1					no responding	0
tumor specific responding	4		tumor specific responding	1					no responding	0
tumor specific responding	5		tumor specific responding	1					no responding	0
tumor specific responding	3		tumor specific responding	1					no responding	0
tumor specific responding	8		tumor specific responding	1					no responding	0
tumor specific responding	8		tumor specific responding	1					no responding	0
tumor specific responding	9		tumor specific responding	1					no responding	0
tumor specific responding	2		tumor specific responding	1					no responding	0
tumor specific responding	10		tumor specific responding	0					no responding	0
tumor specific responding	1		tumor specific responding	0					no responding	0
tumor specific responding	3		tumor specific responding	0					no responding	0
tumor specific responding	3		tumor specific responding	0					no responding	0
tumor specific responding	9		tumor specific responding	0					no responding	0
tumor specific responding	1		tumor specific responding	0					no responding	0
tumor specific responding	7		tumor specific responding	0					no responding	0
tumor specific responding	8		tumor specific responding	0					no responding	0
tumor specific responding	8		tumor specific responding	0					no responding	0
tumor specific responding	5		tumor specific responding	0					no responding	0
tumor specific responding	6		tumor specific responding	0					no responding	0
tumor specific responding	5		tumor specific responding	0					no responding	0
tumor specific responding	11		tumor specific responding	0					no responding	0
tumor specific responding	4		tumor specific responding	0					no responding	0
tumor specific responding	7		tumor specific responding	0					no responding	0
tumor specific responding	2		tumor specific responding	0					no responding	0
tumor specific responding	5		tumor specific responding	0					no responding	0
tumor specific responding	9		tumor specific responding	0					no responding	0
tumor specific responding	5		tumor specific responding	0					no responding	0
tumor specific responding	9		tumor specific responding	0					no responding	0
tumor specific responding	10		tumor specific responding	0					no responding	0
tumor specific responding	7		tumor specific responding	0					no responding	0
tumor specific responding	5		tumor specific responding	0					no responding	0
tumor specific responding	1		tumor specific responding	0					no responding	0
tumor specific responding	7		tumor specific responding	0					no responding	0
tumor specific responding	6		tumor specific responding	0					no responding	0
tumor specific responding	2		tumor specific responding	0					no responding	0
tumor specific responding	2		tumor specific responding	0					no responding	0
tumor specific responding	5		tumor specific responding	0					no responding	0
tumor specific responding	2		tumor specific responding	0					no responding	0
tumor specific responding	9		tumor specific responding	0					no responding	0
tumor specific responding	6		tumor specific responding	0					no responding	0
tumor specific responding	4		tumor specific responding	0					no responding	0
tumor specific responding	4		tumor specific responding	0					no responding	0
tumor specific responding	6		tumor specific responding	0					no responding	0
tumor specific responding	2		tumor specific responding	0					no responding	0
tumor specific responding	0		tumor specific responding	0					no responding	0
tumor specific responding	7		tumor specific responding	0					no responding	0
tumor specific responding	3		tumor specific responding	0					no responding	0
tumor specific responding	2		tumor specific responding	0					no responding	0
tumor specific responding	4		tumor specific responding	0					no responding	0
tumor specific responding	1		tumor specific responding	0					no responding	0
tumor specific responding	4		tumor specific responding	0					no responding	0
tumor specific responding	5		tumor specific responding	0					no responding	0
tumor specific responding	49		tumor specific responding	0					no responding	0
tumor specific responding	35		tumor specific responding	0					no responding	0
tumor specific responding	35		tumor specific responding	0					no responding	0
tumor specific responding	1		tumor specific responding	0					no responding	0
tumor specific responding	8		tumor specific responding	0					no responding	0
tumor specific responding	33		tumor specific responding	0					no responding	0
tumor specific responding	8		tumor specific responding	0					no responding	0
tumor specific responding	8		tumor specific responding	0					no responding	0
tumor specific responding	8		tumor specific responding	0					no responding	0
tumor specific responding	8		tumor specific responding	0					no responding	0
tumor specific responding	29		tumor specific responding	0					no responding	0
tumor specific responding	3		tumor specific responding	0					no responding	0
tumor specific responding	23		tumor specific responding	0					no responding	0
tumor specific responding	0		tumor specific responding	0					no responding	0
tumor specific responding	0		tumor specific responding	0					no responding	0
tumor specific responding	3		tumor specific responding	0					no responding	0
tumor specific responding	3		tumor specific responding	0					no responding	0
tumor specific responding	1		tumor specific responding	0					no responding	0
tumor specific responding	1		tumor specific responding	0					no responding	0
tumor specific responding	0		tumor specific responding	0					no responding	0
tumor specific responding	0		tumor specific responding	0					no responding	0
tumor specific responding	4		tumor specific responding	0					no responding	0
tumor specific responding	0		tumor specific responding	0					no responding	0
tumor specific responding	0		tumor specific responding	0					no responding	0
tumor specific responding	2		tumor specific responding	0					no responding	0
tumor specific responding	0		tumor specific responding	0					no responding	0
tumor specific responding	4		tumor specific responding	0					no responding	0
tumor specific responding	0		tumor specific responding	0					no responding	0
tumor specific responding	1		tumor specific responding	0					no responding	0
tumor specific responding	0		tumor specific responding	0					no responding	0
tumor specific responding	15		tumor specific responding	0					no responding	0
tumor specific responding	5		tumor specific responding	0					no responding	0
tumor specific responding	5		tumor specific responding	0					no responding	0
tumor specific responding	4		tumor specific responding	0					no responding	0
tumor specific responding	4		tumor specific responding	0					no responding	0
tumor specific responding	4		tumor specific responding	0					no responding	0
tumor specific responding	2		tumor specific responding	0					no responding	0
tumor specific responding	2		tumor specific responding	0					no responding	0
tumor specific responding	1		tumor specific responding	0					no responding	0
tumor specific responding	0		tumor specific responding	0					no responding	0
tumor specific responding	4								no responding	0
normal specific responding	46								no responding	0
normal specific responding	28								no responding	0
normal specific responding	9								no responding	0
normal specific responding	11								no responding	0
normal specific responding	9								no responding	0
normal specific responding	9								no responding	0
normal specific responding	12								no responding	0
normal specific responding	4								no responding	0
normal specific responding	22								no responding	0
normal specific responding	12								no responding	0
normal specific responding	4								no responding	0
normal specific responding	1								no responding	0
normal specific responding	8								no responding	0
normal specific responding	5								no responding	0
normal specific responding	15								no responding	0
normal specific responding	15								no responding	0
normal specific responding	8								no responding	0
normal specific responding	14								no responding	0
normal specific responding	9								no responding	0
normal specific responding	0								no responding	0
normal specific responding	0								no responding	0
normal specific responding	6								no responding	0
normal specific responding	5								no responding	0
normal specific responding	9								no responding	0
normal specific responding	6
normal specific responding	7
normal specific responding	1
normal specific responding	2
normal specific responding	11
normal specific responding	0
normal specific responding	1
normal specific responding	10
normal specific responding	3
normal specific responding	2
normal specific responding	1
normal specific responding	8
normal specific responding	1
normal specific responding	0
normal specific responding	8
normal specific responding	5
normal specific responding	3
normal specific responding	3
normal specific responding	2
normal specific responding	2
normal specific responding	7
normal specific responding	1
normal specific responding	0
normal specific responding	3
normal specific responding	10
normal specific responding	1
normal specific responding	6
normal specific responding	7
normal specific responding	2
normal specific responding	2
normal specific responding	0
normal specific responding	2
normal specific responding	1
normal specific responding	3
normal specific responding	5
normal specific responding	3
normal specific responding	9
normal specific responding	0
normal specific responding	2
normal specific responding	6
normal specific responding	1
normal specific responding	5
normal specific responding	6
normal specific responding	2
normal specific responding	3
normal specific responding	0
normal specific responding	5
normal specific responding	4
normal specific responding	3
normal specific responding	2
normal specific responding	7
normal specific responding	3
normal specific responding	1
normal specific responding	10
normal specific responding	0
normal specific responding	1
normal specific responding	1
normal specific responding	4
normal specific responding	1
normal specific responding	1
normal specific responding	0
normal specific responding	2
normal specific responding	5
normal specific responding	0
normal specific responding	0
normal specific responding	1
normal specific responding	6
normal specific responding	2
normal specific responding	3
normal specific responding	2
normal specific responding	5
normal specific responding	1
normal specific responding	0
normal specific responding	0
normal specific responding	0
normal specific responding	0
normal specific responding	2
normal specific responding	0
normal specific responding	6
normal specific responding	2
normal specific responding	0
normal specific responding	0
normal specific responding	1
normal specific responding	3
normal specific responding	0
normal specific responding	0
normal specific responding	2
normal specific responding	0
normal specific responding	6
normal specific responding	3
normal specific responding	2
normal specific responding	3
normal specific responding	3
normal specific responding	0
normal specific responding	2
normal specific responding	2
normal specific responding	0
normal specific responding	0
normal specific responding	1
normal specific responding	4
normal specific responding	4
normal specific responding	0
normal specific responding	8
normal specific responding	1
normal specific responding	2
normal specific responding	4
normal specific responding	0
normal specific responding	1
normal specific responding	3
normal specific responding	4
normal specific responding	1
normal specific responding	0
normal specific responding	1
normal specific responding	1
normal specific responding	0
normal specific responding	1
normal specific responding	2
normal specific responding	1
normal specific responding	0
normal specific responding	0
normal specific responding	4
normal specific responding	0
normal specific responding	1
normal specific responding	2
normal specific responding	1
normal specific responding	1
normal specific responding	1
normal specific responding	2
normal specific responding	1
normal specific responding	1
normal specific responding	0
normal specific responding	1
normal specific responding	0
normal specific responding	1
normal specific responding	0
normal specific responding	0
normal specific responding	3
normal specific responding	1
normal specific responding	2
normal specific responding	3
normal specific responding	3
normal specific responding	12
normal specific responding	9
normal specific responding	4
normal specific responding	4
normal specific responding	8
normal specific responding	3
normal specific responding	10
normal specific responding	7
normal specific responding	4
normal specific responding	22
normal specific responding	2
normal specific responding	5
normal specific responding	2
normal specific responding	0
normal specific responding	1
normal specific responding	5
normal specific responding	1
normal specific responding	1
normal specific responding	2
normal specific responding	1
normal specific responding	0
normal specific responding	0
normal specific responding	3
normal specific responding	6
normal specific responding	9
normal specific responding	7
normal specific responding	1
normal specific responding	0
normal specific responding	4
normal specific responding	39
normal specific responding	5
normal specific responding	23
normal specific responding	28
normal specific responding	22
normal specific responding	24
normal specific responding	7
normal specific responding	12
normal specific responding	12
normal specific responding	3
normal specific responding	2
normal specific responding	1
normal specific responding	76
normal specific responding	28
normal specific responding	25
normal specific responding	2
normal specific responding	4
normal specific responding	19
normal specific responding	0
normal specific responding	18
no responding	38
no responding	39
no responding	24
no responding	13
no responding	23
no responding	33
no responding	33
no responding	30
no responding	10
no responding	3
no responding	3
no responding	13
no responding	24
no responding	1
no responding	16
no responding	20
no responding	17
no responding	9
no responding	3
no responding	0
no responding	15
no responding	15
no responding	17
no responding	4
no responding	15
no responding	1
no responding	1
no responding	14
no responding	12
no responding	12
no responding	14
no responding	10
no responding	18
no responding	1
no responding	9
no responding	11
no responding	5
no responding	1
no responding	15
no responding	7
no responding	11
no responding	4
no responding	2
no responding	5
no responding	3
no responding	1
no responding	7
no responding	3
no responding	10
no responding	2
no responding	1
no responding	10
no responding	5
no responding	2
no responding	9
no responding	6
no responding	0
no responding	1
no responding	10
no responding	4
no responding	1
no responding	10
no responding	9
no responding	6
no responding	8
no responding	3
no responding	0
no responding	4
no responding	0
no responding	8
no responding	1
no responding	2
no responding	4
no responding	6
no responding	0
no responding	2
no responding	4
no responding	1
no responding	3
no responding	7
no responding	2
no responding	9
no responding	5
no responding	0
no responding	7
no responding	5
no responding	1
no responding	5
no responding	5
no responding	9
no responding	3
no responding	0
no responding	7
no responding	7
no responding	4
no responding	2
no responding	0
no responding	6
no responding	0
no responding	5
no responding	1
no responding	5
no responding	2
no responding	7
no responding	3
no responding	9
no responding	6
no responding	1
no responding	7
no responding	7
no responding	0
no responding	9
no responding	0
no responding	9
no responding	3
no responding	0
no responding	5
no responding	3
no responding	2
no responding	1
no responding	0
no responding	0
no responding	2
no responding	4
no responding	6
no responding	0
no responding	1
no responding	0
no responding	0
no responding	1
no responding	9
no responding	7
no responding	0
no responding	1
no responding	0
no responding	3
no responding	1
no responding	11
no responding	5
no responding	0
no responding	1
no responding	3
no responding	0
no responding	0
no responding	0
no responding	1
no responding	3
no responding	1
no responding	4
no responding	1
no responding	1
no responding	7
no responding	0
no responding	1
no responding	6
no responding	5
no responding	0
no responding	0
no responding	0
no responding	5
no responding	4
no responding	0
no responding	0
no responding	1
no responding	2
no responding	2
no responding	2
no responding	0
no responding	0
no responding	3
no responding	0
no responding	0
no responding	1
no responding	0
no responding	6
no responding	1
no responding	2
no responding	3
no responding	0
no responding	0
no responding	1
no responding	0
no responding	0
no responding	0
no responding	1
no responding	2
no responding	5
no responding	2
no responding	0
no responding	1
no responding	0
no responding	3
no responding	0
no responding	3
no responding	1
no responding	0
no responding	4
no responding	4
no responding	5
no responding	4
no responding	3
no responding	2
no responding	3
no responding	6
no responding	3
no responding	1
no responding	1
no responding	1
no responding	2
no responding	4
no responding	0
no responding	3
no responding	0
no responding	1
no responding	1
no responding	4
no responding	2
no responding	2
no responding	4
no responding	0
no responding	1
no responding	4
no responding	4
no responding	3
no responding	0
no responding	3
no responding	3
no responding	3
no responding	1
no responding	0
no responding	0
no responding	0
no responding	2
no responding	1
no responding	0
no responding	2
no responding	2
no responding	1
no responding	3
no responding	1
no responding	2
no responding	0
no responding	3
no responding	0
no responding	4
no responding	0
no responding	6
no responding	0
no responding	5
no responding	0
no responding	4
no responding	0
no responding	0
no responding	1
no responding	3
no responding	3
no responding	1
no responding	0
no responding	1
no responding	0
no responding	0
no responding	0
no responding	0
no responding	0
no responding	5
no responding	1
no responding	2
no responding	1
no responding	0
no responding	2
no responding	5
no responding	2
no responding	2
no responding	1
no responding	0
no responding	0
no responding	3
no responding	0
no responding	0
no responding	2
no responding	1
no responding	0
no responding	0
no responding	0
no responding	1
no responding	0
no responding	0
no responding	0
no responding	0
no responding	2
no responding	1
no responding	1
no responding	1
no responding	0
no responding	0
no responding	0
no responding	2
no responding	3
no responding	0
no responding	1
no responding	2
no responding	1
no responding	3
no responding	0
no responding	1
no responding	1
no responding	0
no responding	1
no responding	1
no responding	1
no responding	1
no responding	0
no responding	0
no responding	0
no responding	0
no responding	1
no responding	0
no responding	1
no responding	1
no responding	1
no responding	3
no responding	0
no responding	0
no responding	1
no responding	0
no responding	1
no responding	3
no responding	0
no responding	2
no responding	0
no responding	0
no responding	0
no responding	1
no responding	1
no responding	1
no responding	0
no responding	0
no responding	0
no responding	2
no responding	0
no responding	0
no responding	0
no responding	3
no responding	0
no responding	0
no responding	0
no responding	0
no responding	11
no responding	5
no responding	16
no responding	2
no responding	3
no responding	26
no responding	27
no responding	2
no responding	11
no responding	20
no responding	0
no responding	0
no responding	4
no responding	2
no responding	7
no responding	4
no responding	1
no responding	3
no responding	0
no responding	0
no responding	1
no responding	0
no responding	6
no responding	21
no responding	0
no responding	0
no responding	0
no responding	0
no responding	0
no responding	0
no responding	0
no responding	0
no responding	0
no responding	0
no responding	0
no responding	0
no responding	13
no responding	3
no responding	12
no responding	2
no responding	4
no responding	3
no responding	8
no responding	9
no responding	6
no responding	6
no responding	0
no responding	2
no responding	9
no responding	0
no responding	0
no responding	9
no responding	4
no responding	5
no responding	3
no responding	8
no responding	3
no responding	4
no responding	4
no responding	4
no responding	4
no responding	1
no responding	2
no responding	5
no responding	3
no responding	1
no responding	8
no responding	5
no responding	1
no responding	2
no responding	1
no responding	8
no responding	9
no responding	2
no responding	8
no responding	1
no responding	2
no responding	4
no responding	2
divergent responding	10
divergent responding	37
divergent responding	17
divergent responding	4
divergent responding	55
divergent responding	52
divergent responding	52
divergent responding	38
divergent responding	38
divergent responding	16
divergent responding	3
divergent responding	28
divergent responding	15
divergent responding	21
divergent responding	35
divergent responding	6
divergent responding	44
divergent responding	14
divergent responding	12
divergent responding	30
divergent responding	24
divergent responding	15
divergent responding	34
divergent responding	7
divergent responding	31
divergent responding	26
divergent responding	1
divergent responding	4
divergent responding	15
divergent responding	7
divergent responding	16
divergent responding	9
divergent responding	9
divergent responding	8
divergent responding	25
divergent responding	9
divergent responding	14
divergent responding	8
divergent responding	8
divergent responding	31
divergent responding	22
divergent responding	20
divergent responding	2
divergent responding	4
divergent responding	14
divergent responding	3
divergent responding	9
divergent responding	19
divergent responding	19
divergent responding	11
divergent responding	8
divergent responding	4
divergent responding	8
divergent responding	3
divergent responding	8
divergent responding	9
divergent responding	10
divergent responding	4
divergent responding	14
divergent responding	10
divergent responding	8
divergent responding	8
divergent responding	0
divergent responding	5
divergent responding	6
divergent responding	12
divergent responding	5
divergent responding	9
divergent responding	2
divergent responding	5
divergent responding	9
divergent responding	3
divergent responding	11
divergent responding	2
divergent responding	5
divergent responding	6
divergent responding	3
divergent responding	6
divergent responding	13
divergent responding	5
divergent responding	4
divergent responding	5
divergent responding	5
divergent responding	2
divergent responding	5
divergent responding	2
divergent responding	2
divergent responding	2
divergent responding	7
divergent responding	3
divergent responding	4
divergent responding	5
divergent responding	5
divergent responding	2
divergent responding	4
divergent responding	7
divergent responding	3
divergent responding	0
divergent responding	3
divergent responding	2
divergent responding	12
divergent responding	3
divergent responding	6
divergent responding	10
divergent responding	3
divergent responding	7
divergent responding	2
divergent responding	0
divergent responding	8
divergent responding	2
divergent responding	3
divergent responding	1
divergent responding	8
divergent responding	0
divergent responding	0
divergent responding	0
divergent responding	0
divergent responding	2
divergent responding	2
divergent responding	6
divergent responding	4
divergent responding	4
divergent responding	3
divergent responding	1
divergent responding	0
divergent responding	2
divergent responding	0
divergent responding	3
divergent responding	4
divergent responding	1
divergent responding	4
divergent responding	6
divergent responding	2
divergent responding	1
divergent responding	3
divergent responding	2
divergent responding	1
divergent responding	1
divergent responding	5
divergent responding	4
divergent responding	1
divergent responding	1
divergent responding	0
divergent responding	2
divergent responding	3
divergent responding	2
divergent responding	0
divergent responding	1
divergent responding	2
divergent responding	2
divergent responding	2
divergent responding	0
divergent responding	2
divergent responding	0
divergent responding	2
divergent responding	4
divergent responding	7
divergent responding	0
divergent responding	1
divergent responding	2
divergent responding	0
divergent responding	0
divergent responding	2
divergent responding	1
divergent responding	3
divergent responding	0
divergent responding	1
divergent responding	1
divergent responding	0
divergent responding	1
divergent responding	0
divergent responding	18
divergent responding	20
divergent responding	27
divergent responding	15
divergent responding	11
divergent responding	21
divergent responding	19
divergent responding	21
divergent responding	17
divergent responding	12
divergent responding	3
divergent responding	11
divergent responding	2
divergent responding	3
divergent responding	2
divergent responding	3
divergent responding	3
divergent responding	7
divergent responding	15
divergent responding	23
divergent responding	0
divergent responding	1
divergent responding	0
divergent responding	22
divergent responding	7
divergent responding	1
divergent responding	2
divergent responding	0
divergent responding	0
divergent responding	1
divergent responding	5
divergent responding	0
divergent responding	1
divergent responding	2
divergent responding	2
divergent responding	1
divergent responding	1
divergent responding	1
divergent responding	0
divergent responding	1
divergent responding	0
divergent responding	0
divergent responding	6
divergent responding	0
divergent responding	0
divergent responding	1
divergent responding	6
divergent responding	9
divergent responding	6
divergent responding	4
divergent responding	5
divergent responding	10
divergent responding	0
divergent responding	6
divergent responding	11
divergent responding	3
divergent responding	1
divergent responding	7
divergent responding	3
divergent responding	5
divergent responding	2
divergent responding	8
divergent responding	4
divergent responding	7
divergent responding	10
divergent responding	5
divergent responding	1
divergent responding	5
divergent responding	1
consistent responding	2
consistent responding	10
consistent responding	4
consistent responding	5
consistent responding	2
consistent responding	4
consistent responding	4
consistent responding	2
consistent responding	7
consistent responding	0
consistent responding	0
consistent responding	2
consistent responding	2
consistent responding	0
consistent responding	0
consistent responding	0
consistent responding	3
consistent responding	1
consistent responding	0
consistent responding	2
consistent responding	3
consistent responding	5
consistent responding	2
consistent responding	0
consistent responding	3
consistent responding	1
