# Supplementary material for: Systematic Analysis of Time-Series Gene Expression Data on Tumor Cell-Selective Apoptotic Responses to HDAC Inhibitors
Source: Comput Math Methods Med. 2014 Oct 13;2014:867289. doi: 10.1155/2014/867289 (PMC4211306; doi:10.1155/2014/867289)
Supplement: Supplementary file 1 — Table S1. H-score of all pathways for tumor and normal samples: This table lists the name, category, website and H-score values for all 1307 pathway. Table S2. Illustrative pathways belonging to term "No responding": This table lists the name, category, website and TVPC patterns for "No responding" pathways. Table S3. Illustrative pathways belonging to term "Consistent responding": This table lists the name, category, website and TVPC patterns for "Consistent responding" pathways. Table S4. Illustrative pathways belonging to term "Tumor specific responding": This table lists the name, category, website and TVPC patterns for "Tumor specific responding" pathways. Table S5. Illustrative pathways belonging to term "Normal specific responding": This table lists the name, category, web site and TVPC patterns for "Normal specific responding" pathways. Table S6. Illustrative pathways belonging to term "Divergent responding": This table lists the name, category, website and TVPC patterns for "Divergent responding" pathways. Table S7. Genes within profile #0 for normal samples: This table contains all genes within profile #0 for normal samples, and lists the normalized expression data to the right of gene symbol. Table S8. Genes within profile #2 for normal samples: This table contains all genes within profile #2 for normal samples, and lists the normalized expression data to the right of gene symbol. Table S9. Genes within profile #9 for normal samples: This table contains all genes within profile #9 for normal samples, and lists the normalized expression data to the right of gene symbol. Table S10. Genes within profile #12 for normal samples: This table contains all genes within profile # 12 for normal samples, and lists the normalized expression data to the right of gene symbol. Table S11. Genes within profile #14 for normal samples: This table contains all genes within profile #14 for normal samples, and lists the normalized expression data to the right of gene symbol. Ta [file 867289.f1.zip › 867289.f1/Table S6.xls]

## Sheet: Sheet1
Pathway name	Categories	NO.all	NO.in	Web site	Pattern-tumor	Pattern-normal	Term	OMIC gene counts
GO MICROTUBULE CYTOSKELETON	Cellular component	152	136	http://www.broadinstitute.org/gsea/msigdb/cards/MICROTUBULE_CYTOSKELETON	0111	1101	divergent responding	9
KEGG ENDOCYTOSIS	Cellular Processes	183	157	http://www.broadinstitute.org/gsea/msigdb/cards/KEGG_ENDOCYTOSIS	0111	0010	divergent responding	20
BIOCARTA PROTEASOME PATHWAY	Adhesion – Metabolism	28	26	http://www.broadinstitute.org/gsea/msigdb/cards/BIOCARTA_PROTEASOME_PATHWAY	1110	0111	divergent responding	1
GO DEPHOSPHORYLATION	Biological process	70	70	http://www.broadinstitute.org/gsea/msigdb/cards/DEPHOSPHORYLATION	1110	1000	divergent responding	2
KEGG GNRH SIGNALING PATHWAY	Organismal Systems	101	97	http://www.broadinstitute.org/gsea/msigdb/cards/KEGG_GNRH_SIGNALING_PATHWAY	1110	1000	divergent responding	12
GO MEMBRANE FRACTION	Cellular component	339	321	http://www.broadinstitute.org/gsea/msigdb/cards/MEMBRANE_FRACTION	1110	0011	divergent responding	6
GO CARBOHYDRATE METABOLIC PROCESS	Biological process	180	171	http://www.broadinstitute.org/gsea/msigdb/cards/CARBOHYDRATE_METABOLIC_PROCESS	1110	0010	divergent responding	9
GO CELLULAR CARBOHYDRATE METABOLIC PROCESS	Biological process	126	120	http://www.broadinstitute.org/gsea/msigdb/cards/CELLULAR_CARBOHYDRATE_METABOLIC_PROCESS	1110	0010	divergent responding	8
KEGG PEROXISOME	Cellular Processes	78	72	http://www.broadinstitute.org/gsea/msigdb/cards/KEGG_PEROXISOME	1110	0010	divergent responding	3
GO RNA BINDING	Molecular function	259	213	http://www.broadinstitute.org/gsea/msigdb/cards/RNA_BINDING	1101	0111	divergent responding	7
GO TRANSMEMBRANE RECEPTOR ACTIVITY	Molecular function	418	394	http://www.broadinstitute.org/gsea/msigdb/cards/TRANSMEMBRANE_RECEPTOR_ACTIVITY	1101	0110	divergent responding	16
GO TRANSCRIPTION FACTOR ACTIVITY	Molecular function	354	320	http://www.broadinstitute.org/gsea/msigdb/cards/TRANSCRIPTION_FACTOR_ACTIVITY	1100	1101	divergent responding	44
GO PROTEIN TYROSINE PHOSPHATASE ACTIVITY	Molecular function	53	53	http://www.broadinstitute.org/gsea/msigdb/cards/PROTEIN_TYROSINE_PHOSPHATASE_ACTIVITY	1100	1000	divergent responding	2
KEGG WNT SIGNALING PATHWAY	Environmental Information Processing	151	144	http://www.broadinstitute.org/gsea/msigdb/cards/KEGG_WNT_SIGNALING_PATHWAY	1100	1000	divergent responding	15
BIOCARTA NFKB PATHWAY	Cell Signaling – Expression	23	22	http://www.broadinstitute.org/gsea/msigdb/cards/BIOCARTA_NFKB_PATHWAY	1100	1000	divergent responding	2
BIOCARTA CDMAC PATHWAY	Cell Signaling-Immunology	16	15	http://www.broadinstitute.org/gsea/msigdb/cards/BIOCARTA_CDMAC_PATHWAY	1100	0100	divergent responding	5
GO RECEPTOR SIGNALING PROTEIN ACTIVITY	Molecular function	82	78	http://www.broadinstitute.org/gsea/msigdb/cards/RECEPTOR_SIGNALING_PROTEIN_ACTIVITY	1100	0010	divergent responding	6
KEGG PHOSPHATIDYLINOSITOL SIGNALING SYSTEM	Environmental Information Processing	76	67	http://www.broadinstitute.org/gsea/msigdb/cards/KEGG_PHOSPHATIDYLINOSITOL_SIGNALING_SYSTEM	1100	0001	divergent responding	3
BIOCARTA MAL PATHWAY	Cell Signaling	19	18	http://www.broadinstitute.org/gsea/msigdb/cards/BIOCARTA_MAL_PATHWAY	1011	0111	divergent responding	5
GO PROTEIN FOLDING	Biological process	58	55	http://www.broadinstitute.org/gsea/msigdb/cards/PROTEIN_FOLDING	1011	1110	divergent responding	0
GO CYTOSKELETAL PART	Cellular component	235	215	http://www.broadinstitute.org/gsea/msigdb/cards/CYTOSKELETAL_PART	1011	1100	divergent responding	15
KEGG NEUROTROPHIN SIGNALING PATHWAY	Organismal Systems	126	122	http://www.broadinstitute.org/gsea/msigdb/cards/KEGG_NEUROTROPHIN_SIGNALING_PATHWAY	1011	1010	divergent responding	21
GO CYTOSKELETON	Cellular component	367	336	http://www.broadinstitute.org/gsea/msigdb/cards/CYTOSKELETON	1011	1000	divergent responding	21
KEGG T CELL RECEPTOR SIGNALING PATHWAY	Organismal Systems	108	107	http://www.broadinstitute.org/gsea/msigdb/cards/KEGG_T_CELL_RECEPTOR_SIGNALING_PATHWAY	1011	1000	divergent responding	21
GO NUCLEAR LUMEN	Cellular component	387	325	http://www.broadinstitute.org/gsea/msigdb/cards/NUCLEAR_LUMEN	1011	0110	divergent responding	35
GO HELICASE ACTIVITY	Molecular function	51	45	http://www.broadinstitute.org/gsea/msigdb/cards/HELICASE_ACTIVITY	1011	0101	divergent responding	8
BIOCARTA CARM ER PATHWAY	Cell Signaling-Cytokines/Chemokines -Expression	35	32	http://www.broadinstitute.org/gsea/msigdb/cards/BIOCARTA_CARM_ER_PATHWAY	1011	0010	divergent responding	5
BIOCARTA RACCYCD PATHWAY	Cell Signaling	26	26	http://www.broadinstitute.org/gsea/msigdb/cards/BIOCARTA_RACCYCD_PATHWAY	1011	0010	divergent responding	11
GO CELL CYCLE GO 0007049	Biological process	315	285	http://www.broadinstitute.org/gsea/msigdb/cards/CELL_CYCLE_GO_0007049	1010	1110	divergent responding	30
GO REGULATION OF RNA METABOLIC PROCESS	Biological process	471	411	http://www.broadinstitute.org/gsea/msigdb/cards/REGULATION_OF_RNA_METABOLIC_PROCESS	1010	1000	divergent responding	52
GO REGULATION OF TRANSCRIPTIONDNA DEPENDENT	Biological process	461	406	http://www.broadinstitute.org/gsea/msigdb/cards/REGULATION_OF_TRANSCRIPTIONDNA_DEPENDENT	1010	1000	divergent responding	52
GO PHOSPHOPROTEIN PHOSPHATASE ACTIVITY	Molecular function	81	79	http://www.broadinstitute.org/gsea/msigdb/cards/PHOSPHOPROTEIN_PHOSPHATASE_ACTIVITY	1010	1000	divergent responding	3
GO DOUBLE STRAND BREAK REPAIR	Biological process	23	22	http://www.broadinstitute.org/gsea/msigdb/cards/DOUBLE_STRAND_BREAK_REPAIR	1010	1000	divergent responding	2
GO RNA PROCESSING	Biological process	173	133	http://www.broadinstitute.org/gsea/msigdb/cards/RNA_PROCESSING	1010	0110	divergent responding	4
GO RIBONUCLEOPROTEIN COMPLEX BIOGENESIS AND ASSEMBLY	Biological process	86	56	http://www.broadinstitute.org/gsea/msigdb/cards/RIBONUCLEOPROTEIN_COMPLEX_BIOGENESIS_AND_ASSEMBLY	1010	0110	divergent responding	3
GO MICROBODY	Cellular component	47	44	http://www.broadinstitute.org/gsea/msigdb/cards/MICROBODY	1010	0100	divergent responding	0
GO PEROXISOME	Cellular component	47	44	http://www.broadinstitute.org/gsea/msigdb/cards/PEROXISOME	1010	0100	divergent responding	0
GO TRANSCRIPTION FROM RNA POLYMERASE II PROMOTER	Biological process	457	414	http://www.broadinstitute.org/gsea/msigdb/cards/TRANSCRIPTION_FROM_RNA_POLYMERASE_II_PROMOTER	1010	0010	divergent responding	55
GO NITROGEN COMPOUND METABOLIC PROCESS	Biological process	155	147	http://www.broadinstitute.org/gsea/msigdb/cards/NITROGEN_COMPOUND_METABOLIC_PROCESS	1010	0010	divergent responding	4
GO CENTROSOME	Cellular component	58	49	http://www.broadinstitute.org/gsea/msigdb/cards/CENTROSOME	1010	0001	divergent responding	7
KEGG UBIQUITIN MEDIATED PROTEOLYSIS	Genetic Information Processing	138	122	http://www.broadinstitute.org/gsea/msigdb/cards/KEGG_UBIQUITIN_MEDIATED_PROTEOLYSIS	1001	0111	divergent responding	11
GO NUCLEOPLASM	Cellular component	279	238	http://www.broadinstitute.org/gsea/msigdb/cards/NUCLEOPLASM	1001	1110	divergent responding	31
GO NUCLEOPLASM PART	Cellular component	211	181	http://www.broadinstitute.org/gsea/msigdb/cards/NUCLEOPLASM_PART	1001	1110	divergent responding	20
KEGG METABOLISM OF XENOBIOTICS BY CYTOCHROME P450	Metabolism	70	60	http://www.broadinstitute.org/gsea/msigdb/cards/KEGG_METABOLISM_OF_XENOBIOTICS_BY_CYTOCHROME_P450	1001	1000	divergent responding	0
KEGG STEROID BIOSYNTHESIS	Metabolism	17	16	http://www.broadinstitute.org/gsea/msigdb/cards/KEGG_STEROID_BIOSYNTHESIS	1001	1000	divergent responding	0
BIOCARTA P53HYPOXIA PATHWAY	Apoptosis - Cell Cycle Regulation – Expression	23	22	http://www.broadinstitute.org/gsea/msigdb/cards/BIOCARTA_P53HYPOXIA_PATHWAY	1001	0100	divergent responding	5
GO BIOSYNTHETIC PROCESS	Biological process	470	422	http://www.broadinstitute.org/gsea/msigdb/cards/BIOSYNTHETIC_PROCESS	1001	0011	divergent responding	17
GO PROGRAMMED CELL DEATH	Biological process	432	396	http://www.broadinstitute.org/gsea/msigdb/cards/PROGRAMMED_CELL_DEATH	1001	0010	divergent responding	38
GO APOPTOSIS GO	Biological process	431	395	http://www.broadinstitute.org/gsea/msigdb/cards/APOPTOSIS_GO	1001	0010	divergent responding	38
GO ORGANELLE MEMBRANE	Cellular component	299	271	http://www.broadinstitute.org/gsea/msigdb/cards/ORGANELLE_MEMBRANE	1001	0010	divergent responding	15
GO ENDOPLASMIC RETICULUM	Cellular component	294	258	http://www.broadinstitute.org/gsea/msigdb/cards/ENDOPLASMIC_RETICULUM	1001	0010	divergent responding	7
KEGG FC GAMMA R MEDIATED PHAGOCYTOSIS	Organismal Systems	97	87	http://www.broadinstitute.org/gsea/msigdb/cards/KEGG_FC_GAMMA_R_MEDIATED_PHAGOCYTOSIS	1001	0010	divergent responding	11
GO NUCLEOTIDE BINDING	Molecular function	224	202	http://www.broadinstitute.org/gsea/msigdb/cards/NUCLEOTIDE_BINDING	1001	0001	divergent responding	8
GO RESPONSE TO ENDOGENOUS STIMULUS	Biological process	200	184	http://www.broadinstitute.org/gsea/msigdb/cards/RESPONSE_TO_ENDOGENOUS_STIMULUS	1000	1110	divergent responding	31
GO DNA REPLICATION	Biological process	102	88	http://www.broadinstitute.org/gsea/msigdb/cards/DNA_REPLICATION	1000	1110	divergent responding	11
KEGG BASE EXCISION REPAIR	Genetic Information Processing	35	33	http://www.broadinstitute.org/gsea/msigdb/cards/KEGG_BASE_EXCISION_REPAIR	1000	1110	divergent responding	1
GO DNA DEPENDENT ATPASE ACTIVITY	Molecular function	22	19	http://www.broadinstitute.org/gsea/msigdb/cards/DNA_DEPENDENT_ATPASE_ACTIVITY	1000	1100	divergent responding	0
BIOCARTA VIP PATHWAY	Apoptosis - Cell Signaling – Immunology	29	26	http://www.broadinstitute.org/gsea/msigdb/cards/BIOCARTA_VIP_PATHWAY	1000	1100	divergent responding	3
BIOCARTA ATRBRCA PATHWAY	Apoptosis - Cell Cycle Regulation – Cell Signaling	21	21	http://www.broadinstitute.org/gsea/msigdb/cards/BIOCARTA_ATRBRCA_PATHWAY	1000	1100	divergent responding	10
BIOCARTA TNFR2 PATHWAY	Apoptosis-Cell Signaling	18	18	http://www.broadinstitute.org/gsea/msigdb/cards/BIOCARTA_TNFR2_PATHWAY	1000	1100	divergent responding	1
GO TRANSCRIPTION REPRESSOR ACTIVITY	Molecular function	152	131	http://www.broadinstitute.org/gsea/msigdb/cards/TRANSCRIPTION_REPRESSOR_ACTIVITY	1000	1011	divergent responding	10
GO TRANSCRIPTION FACTOR BINDING	Molecular function	307	268	http://www.broadinstitute.org/gsea/msigdb/cards/TRANSCRIPTION_FACTOR_BINDING	1000	1010	divergent responding	34
GO TRANSCRIPTION COFACTOR ACTIVITY	Molecular function	228	200	http://www.broadinstitute.org/gsea/msigdb/cards/TRANSCRIPTION_COFACTOR_ACTIVITY	1000	1010	divergent responding	25
GO LIGAND DEPENDENT NUCLEAR RECEPTOR ACTIVITY	Molecular function	25	24	http://www.broadinstitute.org/gsea/msigdb/cards/LIGAND_DEPENDENT_NUCLEAR_RECEPTOR_ACTIVITY	1000	1010	divergent responding	2
KEGG ETHER LIPID METABOLISM	Metabolism	33	28	http://www.broadinstitute.org/gsea/msigdb/cards/KEGG_ETHER_LIPID_METABOLISM	1000	0101	divergent responding	1
GO NEGATIVE REGULATION OF NUCLEOBASENUCLEOSIDENUCLEOTIDE AND NUCLEIC ACID METABOLIC PROCESS	Biological process	211	183	http://www.broadinstitute.org/gsea/msigdb/cards/NEGATIVE_REGULATION_OF_NUCLEOBASENUCLEOSIDENUCLEOTIDE_AND_NUCLEIC_ACID_METABOLIC_PROCESS	1000	0100	divergent responding	22
GO NEGATIVE REGULATION OF TRANSCRIPTION	Biological process	188	163	http://www.broadinstitute.org/gsea/msigdb/cards/NEGATIVE_REGULATION_OF_TRANSCRIPTION	1000	0100	divergent responding	19
GO CHEMICAL HOMEOSTASIS	Biological process	155	142	http://www.broadinstitute.org/gsea/msigdb/cards/CHEMICAL_HOMEOSTASIS	1000	0100	divergent responding	3
GO CELLULAR CATION HOMEOSTASIS	Biological process	106	96	http://www.broadinstitute.org/gsea/msigdb/cards/CELLULAR_CATION_HOMEOSTASIS	1000	0100	divergent responding	3
GO CELL SURFACE	Cellular component	79	69	http://www.broadinstitute.org/gsea/msigdb/cards/CELL_SURFACE	1000	0100	divergent responding	3
GO DNA DEPENDENT DNA REPLICATION	Biological process	56	47	http://www.broadinstitute.org/gsea/msigdb/cards/DNA_DEPENDENT_DNA_REPLICATION	1000	0100	divergent responding	8
GO PATTERN SPECIFICATION PROCESS	Biological process	31	28	http://www.broadinstitute.org/gsea/msigdb/cards/PATTERN_SPECIFICATION_PROCESS	1000	0100	divergent responding	1
GO DAMAGED DNA BINDING	Molecular function	21	19	http://www.broadinstitute.org/gsea/msigdb/cards/DAMAGED_DNA_BINDING	1000	0100	divergent responding	7
GO REPLICATION FORK	Cellular component	18	17	http://www.broadinstitute.org/gsea/msigdb/cards/REPLICATION_FORK	1000	0100	divergent responding	1
GO NEGATIVE REGULATION OF DNA METABOLIC PROCESS	Biological process	18	17	http://www.broadinstitute.org/gsea/msigdb/cards/NEGATIVE_REGULATION_OF_DNA_METABOLIC_PROCESS	1000	0100	divergent responding	3
GO CHROMATIN ASSEMBLY	Biological process	16	16	http://www.broadinstitute.org/gsea/msigdb/cards/CHROMATIN_ASSEMBLY	1000	0100	divergent responding	1
GO CELL MATURATION	Biological process	16	15	http://www.broadinstitute.org/gsea/msigdb/cards/CELL_MATURATION	1000	0100	divergent responding	1
BIOCARTA KERATINOCYTE PATHWAY	Cell Signaling-Developmental Biology	46	44	http://www.broadinstitute.org/gsea/msigdb/cards/BIOCARTA_KERATINOCYTE_PATHWAY	1000	0100	divergent responding	9
BIOCARTA NTHI PATHWAY	Cell Signaling	24	23	http://www.broadinstitute.org/gsea/msigdb/cards/BIOCARTA_NTHI_PATHWAY	1000	0100	divergent responding	3
GO GROWTH FACTOR BINDING	Molecular function	32	32	http://www.broadinstitute.org/gsea/msigdb/cards/GROWTH_FACTOR_BINDING	1000	0011	divergent responding	4
GO MITOCHONDRIAL OUTER MEMBRANE	Cellular component	18	17	http://www.broadinstitute.org/gsea/msigdb/cards/MITOCHONDRIAL_OUTER_MEMBRANE	1000	0011	divergent responding	2
GO ANATOMICAL STRUCTURE MORPHOGENESIS	Biological process	376	352	http://www.broadinstitute.org/gsea/msigdb/cards/ANATOMICAL_STRUCTURE_MORPHOGENESIS	1000	0010	divergent responding	28
GO CELLULAR LIPID METABOLIC PROCESS	Biological process	255	226	http://www.broadinstitute.org/gsea/msigdb/cards/CELLULAR_LIPID_METABOLIC_PROCESS	1000	0010	divergent responding	4
GO ENDOMEMBRANE SYSTEM	Cellular component	220	194	http://www.broadinstitute.org/gsea/msigdb/cards/ENDOMEMBRANE_SYSTEM	1000	0010	divergent responding	14
GO TRANSFERASE ACTIVITY TRANSFERRING GLYCOSYL GROUPS	Molecular function	112	103	http://www.broadinstitute.org/gsea/msigdb/cards/TRANSFERASE_ACTIVITY_TRANSFERRING_GLYCOSYL_GROUPS	1000	0010	divergent responding	2
GO GLYCOPROTEIN METABOLIC PROCESS	Biological process	90	85	http://www.broadinstitute.org/gsea/msigdb/cards/GLYCOPROTEIN_METABOLIC_PROCESS	1000	0010	divergent responding	2
GO ENDOPLASMIC RETICULUM PART	Cellular component	97	83	http://www.broadinstitute.org/gsea/msigdb/cards/ENDOPLASMIC_RETICULUM_PART	1000	0010	divergent responding	5
GO TRANSFERASE ACTIVITY TRANSFERRING HEXOSYL GROUPS	Molecular function	81	75	http://www.broadinstitute.org/gsea/msigdb/cards/TRANSFERASE_ACTIVITY_TRANSFERRING_HEXOSYL_GROUPS	1000	0010	divergent responding	2
GO ENDOPLASMIC RETICULUM MEMBRANE	Cellular component	85	74	http://www.broadinstitute.org/gsea/msigdb/cards/ENDOPLASMIC_RETICULUM_MEMBRANE	1000	0010	divergent responding	5
GO GLYCOPROTEIN BIOSYNTHETIC PROCESS	Biological process	74	71	http://www.broadinstitute.org/gsea/msigdb/cards/GLYCOPROTEIN_BIOSYNTHETIC_PROCESS	1000	0010	divergent responding	2
GO POSITIVE REGULATION OF PROTEIN METABOLIC PROCESS	Biological process	75	70	http://www.broadinstitute.org/gsea/msigdb/cards/POSITIVE_REGULATION_OF_PROTEIN_METABOLIC_PROCESS	1000	0010	divergent responding	7
GO STRUCTURE SPECIFIC DNA BINDING	Molecular function	56	53	http://www.broadinstitute.org/gsea/msigdb/cards/STRUCTURE_SPECIFIC_DNA_BINDING	1000	0010	divergent responding	12
GO HEMATOPOIETIN INTERFERON CLASSD200 DOMAIN CYTOKINE RECEPTOR ACTIVITY	Molecular function	33	32	http://www.broadinstitute.org/gsea/msigdb/cards/HEMATOPOIETIN_INTERFERON_CLASSD200_DOMAIN_CYTOKINE_RECEPTOR_ACTIVITY	1000	0010	divergent responding	3
GO JAK STAT CASCADE	Biological process	31	30	http://www.broadinstitute.org/gsea/msigdb/cards/JAK_STAT_CASCADE	1000	0010	divergent responding	4
GO SYNAPSE	Cellular component	27	27	http://www.broadinstitute.org/gsea/msigdb/cards/SYNAPSE	1000	0010	divergent responding	1
GO POSITIVE REGULATION OF PROTEIN MODIFICATION PROCESS	Biological process	29	27	http://www.broadinstitute.org/gsea/msigdb/cards/POSITIVE_REGULATION_OF_PROTEIN_MODIFICATION_PROCESS	1000	0010	divergent responding	5
KEGG TYROSINE METABOLISM	Metabolism	42	39	http://www.broadinstitute.org/gsea/msigdb/cards/KEGG_TYROSINE_METABOLISM	1000	0010	divergent responding	0
BIOCARTA HIVNEF PATHWAY	Apoptosis	58	55	http://www.broadinstitute.org/gsea/msigdb/cards/BIOCARTA_HIVNEF_PATHWAY	1000	0010	divergent responding	6
GO PURINE NUCLEOTIDE BINDING	Molecular function	211	191	http://www.broadinstitute.org/gsea/msigdb/cards/PURINE_NUCLEOTIDE_BINDING	1000	0001	divergent responding	8
GO ADENYL NUCLEOTIDE BINDING	Molecular function	169	150	http://www.broadinstitute.org/gsea/msigdb/cards/ADENYL_NUCLEOTIDE_BINDING	1000	0001	divergent responding	8
GO ADENYL RIBONUCLEOTIDE BINDING	Molecular function	163	146	http://www.broadinstitute.org/gsea/msigdb/cards/ADENYL_RIBONUCLEOTIDE_BINDING	1000	0001	divergent responding	8
GO ATP BINDING	Molecular function	156	139	http://www.broadinstitute.org/gsea/msigdb/cards/ATP_BINDING	1000	0001	divergent responding	8
GO NUCLEOLUS	Cellular component	126	104	http://www.broadinstitute.org/gsea/msigdb/cards/NUCLEOLUS	1000	0001	divergent responding	9
GO STRESS ACTIVATED PROTEIN KINASE SIGNALING PATHWAY	Biological process	49	48	http://www.broadinstitute.org/gsea/msigdb/cards/STRESS_ACTIVATED_PROTEIN_KINASE_SIGNALING_PATHWAY	1000	0001	divergent responding	2
GO JNK CASCADE	Biological process	47	46	http://www.broadinstitute.org/gsea/msigdb/cards/JNK_CASCADE	1000	0001	divergent responding	2
GO REGULATION OF DNA METABOLIC PROCESS	Biological process	45	41	http://www.broadinstitute.org/gsea/msigdb/cards/REGULATION_OF_DNA_METABOLIC_PROCESS	1000	0001	divergent responding	4
KEGG ONE CARBON POOL BY FOLATE	Metabolism	17	16	http://www.broadinstitute.org/gsea/msigdb/cards/KEGG_ONE_CARBON_POOL_BY_FOLATE	1000	0001	divergent responding	1
GO PROTEOLYSIS	Biological process	191	172	http://www.broadinstitute.org/gsea/msigdb/cards/PROTEOLYSIS	0110	1011	divergent responding	3
GO TRANSMEMBRANE RECEPTOR PROTEIN KINASE ACTIVITY	Molecular function	51	51	http://www.broadinstitute.org/gsea/msigdb/cards/TRANSMEMBRANE_RECEPTOR_PROTEIN_KINASE_ACTIVITY	0110	1000	divergent responding	10
GO ENDOSOME	Cellular component	67	57	http://www.broadinstitute.org/gsea/msigdb/cards/ENDOSOME	0110	0100	divergent responding	4
GO PROTEIN AUTOPROCESSING	Biological process	32	28	http://www.broadinstitute.org/gsea/msigdb/cards/PROTEIN_AUTOPROCESSING	0110	0100	divergent responding	2
GO ELECTRON CARRIER ACTIVITY	Molecular function	78	74	http://www.broadinstitute.org/gsea/msigdb/cards/ELECTRON_CARRIER_ACTIVITY	0110	0010	divergent responding	2
GO MACROMOLECULE LOCALIZATION	Biological process	235	207	http://www.broadinstitute.org/gsea/msigdb/cards/MACROMOLECULE_LOCALIZATION	0110	0001	divergent responding	16
GO ACTIVE TRANSMEMBRANE TRANSPORTER ACTIVITY	Molecular function	122	120	http://www.broadinstitute.org/gsea/msigdb/cards/ACTIVE_TRANSMEMBRANE_TRANSPORTER_ACTIVITY	0110	0001	divergent responding	0
GO EXTRACELLULAR REGION	Cellular component	447	415	http://www.broadinstitute.org/gsea/msigdb/cards/EXTRACELLULAR_REGION	0101	0111	divergent responding	4
GO CELLULAR BIOSYNTHETIC PROCESS	Biological process	321	287	http://www.broadinstitute.org/gsea/msigdb/cards/CELLULAR_BIOSYNTHETIC_PROCESS	0101	0111	divergent responding	14
GO RIBONUCLEOPROTEIN COMPLEX	Cellular component	143	119	http://www.broadinstitute.org/gsea/msigdb/cards/RIBONUCLEOPROTEIN_COMPLEX	0101	0111	divergent responding	5
GO RIBOSOMAL SUBUNIT	Cellular component	20	20	http://www.broadinstitute.org/gsea/msigdb/cards/RIBOSOMAL_SUBUNIT	0101	0111	divergent responding	0
KEGG P53 SIGNALING PATHWAY	Cellular Processes	69	64	http://www.broadinstitute.org/gsea/msigdb/cards/KEGG_P53_SIGNALING_PATHWAY	0101	0111	divergent responding	15
GO MITOCHONDRION ORGANIZATION AND BIOGENESIS	Biological process	48	45	http://www.broadinstitute.org/gsea/msigdb/cards/MITOCHONDRION_ORGANIZATION_AND_BIOGENESIS	0101	1011	divergent responding	3
GO REGULATION OF MUSCLE CONTRACTION	Biological process	19	18	http://www.broadinstitute.org/gsea/msigdb/cards/REGULATION_OF_MUSCLE_CONTRACTION	0101	1000	divergent responding	0
GO ER GOLGI INTERMEDIATE COMPARTMENT	Cellular component	24	21	http://www.broadinstitute.org/gsea/msigdb/cards/ER_GOLGI_INTERMEDIATE_COMPARTMENT	0101	0100	divergent responding	0
KEGG AMINO SUGAR AND NUCLEOTIDE SUGAR METABOLISM	Metabolism	44	44	http://www.broadinstitute.org/gsea/msigdb/cards/KEGG_AMINO_SUGAR_AND_NUCLEOTIDE_SUGAR_METABOLISM	0101	0010	divergent responding	0
KEGG DRUG METABOLISM OTHER ENZYMES	Metabolism	51	39	http://www.broadinstitute.org/gsea/msigdb/cards/KEGG_DRUG_METABOLISM_OTHER_ENZYMES	0101	0010	divergent responding	1
GO RNA HELICASE ACTIVITY	Molecular function	24	21	http://www.broadinstitute.org/gsea/msigdb/cards/RNA_HELICASE_ACTIVITY	0101	0001	divergent responding	2
KEGG ABC TRANSPORTERS	Environmental Information Processing	44	44	http://www.broadinstitute.org/gsea/msigdb/cards/KEGG_ABC_TRANSPORTERS	0101	0001	divergent responding	0
GO HYDROLASE ACTIVITY HYDROLYZING O GLYCOSYL COMPOUNDS	Molecular function	37	35	http://www.broadinstitute.org/gsea/msigdb/cards/HYDROLASE_ACTIVITY_HYDROLYZING_O_GLYCOSYL_COMPOUNDS	0100	0111	divergent responding	0
GO COLLAGEN	Cellular component	23	23	http://www.broadinstitute.org/gsea/msigdb/cards/COLLAGEN	0100	0111	divergent responding	0
KEGG ECM RECEPTOR INTERACTION	Environmental Information Processing	84	81	http://www.broadinstitute.org/gsea/msigdb/cards/KEGG_ECM_RECEPTOR_INTERACTION	0100	0111	divergent responding	2
KEGG GLYCOSAMINOGLYCAN DEGRADATION	Metabolism	21	21	http://www.broadinstitute.org/gsea/msigdb/cards/KEGG_GLYCOSAMINOGLYCAN_DEGRADATION	0100	0111	divergent responding	0
GO CHROMOSOME	Cellular component	124	114	http://www.broadinstitute.org/gsea/msigdb/cards/CHROMOSOME	0100	1110	divergent responding	12
GO TRANSMEMBRANE RECEPTOR PROTEIN SERINE THREONINE KINASE SIGNALING PATHWAY	Biological process	47	45	http://www.broadinstitute.org/gsea/msigdb/cards/TRANSMEMBRANE_RECEPTOR_PROTEIN_SERINE_THREONINE_KINASE_SIGNALING_PATHWAY	0100	1110	divergent responding	1
KEGG VALINE LEUCINE AND ISOLEUCINE DEGRADATION	Metabolism	44	43	http://www.broadinstitute.org/gsea/msigdb/cards/KEGG_VALINE_LEUCINE_AND_ISOLEUCINE_DEGRADATION	0100	1100	divergent responding	1
GO GLUTATHIONE TRANSFERASE ACTIVITY	Molecular function	15	15	http://www.broadinstitute.org/gsea/msigdb/cards/GLUTATHIONE_TRANSFERASE_ACTIVITY	0100	1011	divergent responding	0
KEGG MELANOGENESIS	Organismal Systems	102	98	http://www.broadinstitute.org/gsea/msigdb/cards/KEGG_MELANOGENESIS	0100	1000	divergent responding	17
KEGG GLYCOLYSIS GLUCONEOGENESIS	Metabolism	62	60	http://www.broadinstitute.org/gsea/msigdb/cards/KEGG_GLYCOLYSIS_GLUCONEOGENESIS	0100	1000	divergent responding	1
KEGG PROPANOATE METABOLISM	Metabolism	33	31	http://www.broadinstitute.org/gsea/msigdb/cards/KEGG_PROPANOATE_METABOLISM	0100	1000	divergent responding	1
GO AROMATIC COMPOUND METABOLIC PROCESS	Biological process	27	25	http://www.broadinstitute.org/gsea/msigdb/cards/AROMATIC_COMPOUND_METABOLIC_PROCESS	0100	0110	divergent responding	1
KEGG ARRHYTHMOGENIC RIGHT VENTRICULAR CARDIOMYOPATHY ARVC	Human Diseases	76	73	http://www.broadinstitute.org/gsea/msigdb/cards/KEGG_ARRHYTHMOGENIC_RIGHT_VENTRICULAR_CARDIOMYOPATHY_ARVC	0100	0110	divergent responding	2
KEGG RNA DEGRADATION	Genetic Information Processing	59	51	http://www.broadinstitute.org/gsea/msigdb/cards/KEGG_RNA_DEGRADATION	0100	0101	divergent responding	2
GO CELL FRACTION	Cellular component	493	460	http://www.broadinstitute.org/gsea/msigdb/cards/CELL_FRACTION	0100	0011	divergent responding	10
KEGG BUTANOATE METABOLISM	Metabolism	34	31	http://www.broadinstitute.org/gsea/msigdb/cards/KEGG_BUTANOATE_METABOLISM	0100	0011	divergent responding	1
GO SKELETAL DEVELOPMENT	Biological process	103	99	http://www.broadinstitute.org/gsea/msigdb/cards/SKELETAL_DEVELOPMENT	0100	0010	divergent responding	9
GO BASOLATERAL PLASMA MEMBRANE	Cellular component	35	30	http://www.broadinstitute.org/gsea/msigdb/cards/BASOLATERAL_PLASMA_MEMBRANE	0100	0010	divergent responding	1
KEGG DILATED CARDIOMYOPATHY	Human Diseases	92	89	http://www.broadinstitute.org/gsea/msigdb/cards/KEGG_DILATED_CARDIOMYOPATHY	0100	0010	divergent responding	3
KEGG BASAL CELL CARCINOMA	Human Diseases	55	53	http://www.broadinstitute.org/gsea/msigdb/cards/KEGG_BASAL_CELL_CARCINOMA	0100	0010	divergent responding	7
GO TRANSMEMBRANE TRANSPORTER ACTIVITY	Molecular function	375	361	http://www.broadinstitute.org/gsea/msigdb/cards/TRANSMEMBRANE_TRANSPORTER_ACTIVITY	0100	0001	divergent responding	3
GO GUANYL NUCLEOTIDE BINDING	Molecular function	47	45	http://www.broadinstitute.org/gsea/msigdb/cards/GUANYL_NUCLEOTIDE_BINDING	0100	0001	divergent responding	0
GO GTP BINDING	Molecular function	46	44	http://www.broadinstitute.org/gsea/msigdb/cards/GTP_BINDING	0100	0001	divergent responding	0
GO HYDROLASE ACTIVITY ACTING ON GLYCOSYL BONDS	Molecular function	47	44	http://www.broadinstitute.org/gsea/msigdb/cards/HYDROLASE_ACTIVITY_ACTING_ON_GLYCOSYL_BONDS	0100	0001	divergent responding	2
GO GTPASE ACTIVATOR ACTIVITY	Molecular function	60	55	http://www.broadinstitute.org/gsea/msigdb/cards/GTPASE_ACTIVATOR_ACTIVITY	0011	1100	divergent responding	3
GO GTPASE REGULATOR ACTIVITY	Molecular function	125	113	http://www.broadinstitute.org/gsea/msigdb/cards/GTPASE_REGULATOR_ACTIVITY	0011	1000	divergent responding	5
BIOCARTA PDGF PATHWAY	Cell Signaling-Cytokines/Chemokines	32	31	http://www.broadinstitute.org/gsea/msigdb/cards/BIOCARTA_PDGF_PATHWAY	0011	1000	divergent responding	10
GO MACROMOLECULAR COMPLEX ASSEMBLY	Biological process	280	236	http://www.broadinstitute.org/gsea/msigdb/cards/MACROMOLECULAR_COMPLEX_ASSEMBLY	0011	0010	divergent responding	26
GO TRANSCRIPTION FACTOR COMPLEX	Cellular component	89	76	http://www.broadinstitute.org/gsea/msigdb/cards/TRANSCRIPTION_FACTOR_COMPLEX	0011	0010	divergent responding	4
GO ACID AMINO ACID LIGASE ACTIVITY	Molecular function	57	51	http://www.broadinstitute.org/gsea/msigdb/cards/ACID_AMINO_ACID_LIGASE_ACTIVITY	0011	0010	divergent responding	6
GO POSITIVE REGULATION OF IMMUNE SYSTEM PROCESS	Biological process	51	50	http://www.broadinstitute.org/gsea/msigdb/cards/POSITIVE_REGULATION_OF_IMMUNE_SYSTEM_PROCESS	0011	0010	divergent responding	3
BIOCARTA INTEGRIN PATHWAY	Adhesion - Cell Signaling	38	37	http://www.broadinstitute.org/gsea/msigdb/cards/BIOCARTA_INTEGRIN_PATHWAY	0011	0010	divergent responding	6
BIOCARTA RAS PATHWAY	Cell Signaling	23	22	http://www.broadinstitute.org/gsea/msigdb/cards/BIOCARTA_RAS_PATHWAY	0011	0010	divergent responding	8
GO UBIQUITIN LIGASE COMPLEX	Cellular component	26	24	http://www.broadinstitute.org/gsea/msigdb/cards/UBIQUITIN_LIGASE_COMPLEX	0011	0001	divergent responding	3
GO CELL CYCLE PROCESS	Biological process	193	172	http://www.broadinstitute.org/gsea/msigdb/cards/CELL_CYCLE_PROCESS	0010	1110	divergent responding	14
GO CELL CYCLE PHASE	Biological process	170	153	http://www.broadinstitute.org/gsea/msigdb/cards/CELL_CYCLE_PHASE	0010	1110	divergent responding	11
GO MITOTIC CELL CYCLE	Biological process	153	136	http://www.broadinstitute.org/gsea/msigdb/cards/MITOTIC_CELL_CYCLE	0010	1110	divergent responding	10
GO M PHASE	Biological process	114	101	http://www.broadinstitute.org/gsea/msigdb/cards/M_PHASE	0010	1110	divergent responding	5
GO M PHASE OF MITOTIC CELL CYCLE	Biological process	85	77	http://www.broadinstitute.org/gsea/msigdb/cards/M_PHASE_OF_MITOTIC_CELL_CYCLE	0010	1110	divergent responding	5
GO MITOSIS	Biological process	82	75	http://www.broadinstitute.org/gsea/msigdb/cards/MITOSIS	0010	1110	divergent responding	5
GO SPINDLE	Cellular component	39	37	http://www.broadinstitute.org/gsea/msigdb/cards/SPINDLE	0010	1110	divergent responding	1
KEGG ANTIGEN PROCESSING AND PRESENTATION	Organismal Systems	89	81	http://www.broadinstitute.org/gsea/msigdb/cards/KEGG_ANTIGEN_PROCESSING_AND_PRESENTATION	0010	1101	divergent responding	3
GO CHROMOSOME SEGREGATION	Biological process	32	27	http://www.broadinstitute.org/gsea/msigdb/cards/CHROMOSOME_SEGREGATION	0010	1100	divergent responding	1
GO CELL DIVISION	Biological process	21	20	http://www.broadinstitute.org/gsea/msigdb/cards/CELL_DIVISION	0010	1100	divergent responding	2
BIOCARTA VEGF PATHWAY	Cell Signaling	29	27	http://www.broadinstitute.org/gsea/msigdb/cards/BIOCARTA_VEGF_PATHWAY	0010	1100	divergent responding	6
BIOCARTA ALK PATHWAY	Cell Signaling-Developmental Biology - Hematopoiesis	37	36	http://www.broadinstitute.org/gsea/msigdb/cards/BIOCARTA_ALK_PATHWAY	0010	1010	divergent responding	4
BIOCARTA RHO PATHWAY	Adhesion - Cell Signaling-Cytokines/Chemokines	32	31	http://www.broadinstitute.org/gsea/msigdb/cards/BIOCARTA_RHO_PATHWAY	0010	1010	divergent responding	0
GO MOTOR ACTIVITY	Molecular function	28	28	http://www.broadinstitute.org/gsea/msigdb/cards/MOTOR_ACTIVITY	0010	1000	divergent responding	2
GO CYTOKINESIS	Biological process	19	18	http://www.broadinstitute.org/gsea/msigdb/cards/CYTOKINESIS	0010	1000	divergent responding	2
GO MICROTUBULE MOTOR ACTIVITY	Molecular function	16	16	http://www.broadinstitute.org/gsea/msigdb/cards/MICROTUBULE_MOTOR_ACTIVITY	0010	1000	divergent responding	1
KEGG DORSO VENTRAL AXIS FORMATION	Organismal Systems	25	23	http://www.broadinstitute.org/gsea/msigdb/cards/KEGG_DORSO_VENTRAL_AXIS_FORMATION	0010	1000	divergent responding	6
BIOCARTA WNT PATHWAY	Cell Signaling-Developmental Biology	26	25	http://www.broadinstitute.org/gsea/msigdb/cards/BIOCARTA_WNT_PATHWAY	0010	1000	divergent responding	7
BIOCARTA IGF1 PATHWAY	Cell Signaling – Cytokines/Chemokines – Immunology	21	21	http://www.broadinstitute.org/gsea/msigdb/cards/BIOCARTA_IGF1_PATHWAY	0010	1000	divergent responding	7
GO TRANSMEMBRANE RECEPTOR PROTEIN TYROSINE KINASE SIGNALING PATHWAY	Biological process	83	77	http://www.broadinstitute.org/gsea/msigdb/cards/TRANSMEMBRANE_RECEPTOR_PROTEIN_TYROSINE_KINASE_SIGNALING_PATHWAY	0010	0100	divergent responding	13
GO REGULATION OF SECRETION	Biological process	40	32	http://www.broadinstitute.org/gsea/msigdb/cards/REGULATION_OF_SECRETION	0010	0100	divergent responding	0
GO CHROMATIN ASSEMBLY OR DISASSEMBLY	Biological process	26	26	http://www.broadinstitute.org/gsea/msigdb/cards/CHROMATIN_ASSEMBLY_OR_DISASSEMBLY	0010	0100	divergent responding	4
KEGG GRAFT VERSUS HOST DISEASE	Human Diseases	42	37	http://www.broadinstitute.org/gsea/msigdb/cards/KEGG_GRAFT_VERSUS_HOST_DISEASE	0010	0100	divergent responding	2
KEGG ALLOGRAFT REJECTION	Human Diseases	38	34	http://www.broadinstitute.org/gsea/msigdb/cards/KEGG_ALLOGRAFT_REJECTION	0010	0100	divergent responding	2
GO GOLGI APPARATUS	Cellular component	225	199	http://www.broadinstitute.org/gsea/msigdb/cards/GOLGI_APPARATUS	0010	0011	divergent responding	9
KEGG ARGININE AND PROLINE METABOLISM	Metabolism	54	52	http://www.broadinstitute.org/gsea/msigdb/cards/KEGG_ARGININE_AND_PROLINE_METABOLISM	0010	0011	divergent responding	1
GO MICROTUBULE ORGANIZING CENTER	Cellular component	67	57	http://www.broadinstitute.org/gsea/msigdb/cards/MICROTUBULE_ORGANIZING_CENTER	0010	0001	divergent responding	7
GO TUBULIN BINDING	Molecular function	47	42	http://www.broadinstitute.org/gsea/msigdb/cards/TUBULIN_BINDING	0010	0001	divergent responding	4
GO MICROTUBULE BINDING	Molecular function	33	28	http://www.broadinstitute.org/gsea/msigdb/cards/MICROTUBULE_BINDING	0010	0001	divergent responding	3
GO HISTONE MODIFICATION	Biological process	24	19	http://www.broadinstitute.org/gsea/msigdb/cards/HISTONE_MODIFICATION	0010	0001	divergent responding	4
KEGG VIRAL MYOCARDITIS	Human Diseases	73	67	http://www.broadinstitute.org/gsea/msigdb/cards/KEGG_VIRAL_MYOCARDITIS	0010	0001	divergent responding	7
GO EXTRACELLULAR MATRIX STRUCTURAL CONSTITUENT	Molecular function	27	25	http://www.broadinstitute.org/gsea/msigdb/cards/EXTRACELLULAR_MATRIX_STRUCTURAL_CONSTITUENT	0001	0111	divergent responding	0
KEGG RNA POLYMERASE	Genetic Information Processing	29	28	http://www.broadinstitute.org/gsea/msigdb/cards/KEGG_RNA_POLYMERASE	0001	0111	divergent responding	0
GO ORGANELLE ORGANIZATION AND BIOGENESIS	Biological process	473	424	http://www.broadinstitute.org/gsea/msigdb/cards/ORGANELLE_ORGANIZATION_AND_BIOGENESIS	0001	1110	divergent responding	37
GO ENZYME LINKED RECEPTOR PROTEIN SIGNALING PATHWAY	Biological process	140	132	http://www.broadinstitute.org/gsea/msigdb/cards/ENZYME_LINKED_RECEPTOR_PROTEIN_SIGNALING_PATHWAY	0001	1110	divergent responding	14
GO RNA SPLICING	Biological process	91	66	http://www.broadinstitute.org/gsea/msigdb/cards/RNA_SPLICING	0001	1110	divergent responding	4
GO SPLICEOSOME	Cellular component	51	40	http://www.broadinstitute.org/gsea/msigdb/cards/SPLICEOSOME	0001	1110	divergent responding	3
GO NUCLEAR BODY	Cellular component	33	29	http://www.broadinstitute.org/gsea/msigdb/cards/NUCLEAR_BODY	0001	1110	divergent responding	6
GO PROTON TRANSPORTING TWO SECTOR ATPASE COMPLEX	Cellular component	15	15	http://www.broadinstitute.org/gsea/msigdb/cards/PROTON_TRANSPORTING_TWO_SECTOR_ATPASE_COMPLEX	0001	1110	divergent responding	0
KEGG CELL CYCLE	Organismal Systems	128	113	http://www.broadinstitute.org/gsea/msigdb/cards/KEGG_CELL_CYCLE	0001	1110	divergent responding	19
GO POSITIVE REGULATION OF I KAPPAB KINASE NF KAPPAB CASCADE	Biological process	87	79	http://www.broadinstitute.org/gsea/msigdb/cards/POSITIVE_REGULATION_OF_I_KAPPAB_KINASE_NF_KAPPAB_CASCADE	0001	1101	divergent responding	6
GO ENZYME ACTIVATOR ACTIVITY	Molecular function	125	115	http://www.broadinstitute.org/gsea/msigdb/cards/ENZYME_ACTIVATOR_ACTIVITY	0001	1100	divergent responding	6
GO DNA RECOMBINATION	Biological process	47	43	http://www.broadinstitute.org/gsea/msigdb/cards/DNA_RECOMBINATION	0001	1100	divergent responding	6
GO MICROTUBULE CYTOSKELETON ORGANIZATION AND BIOGENESIS	Biological process	35	33	http://www.broadinstitute.org/gsea/msigdb/cards/MICROTUBULE_CYTOSKELETON_ORGANIZATION_AND_BIOGENESIS	0001	1100	divergent responding	2
GO MACROMOLECULE BIOSYNTHETIC PROCESS	Biological process	321	286	http://www.broadinstitute.org/gsea/msigdb/cards/MACROMOLECULE_BIOSYNTHETIC_PROCESS	0001	1011	divergent responding	12
KEGG PATHOGENIC ESCHERICHIA COLI INFECTION	Human Diseases	59	43	http://www.broadinstitute.org/gsea/msigdb/cards/KEGG_PATHOGENIC_ESCHERICHIA_COLI_INFECTION	0001	1011	divergent responding	5
GO RESPONSE TO WOUNDING	Biological process	190	173	http://www.broadinstitute.org/gsea/msigdb/cards/RESPONSE_TO_WOUNDING	0001	1010	divergent responding	4
GO WOUND HEALING	Biological process	54	52	http://www.broadinstitute.org/gsea/msigdb/cards/WOUND_HEALING	0001	1010	divergent responding	3
GO SENSORY PERCEPTION	Biological process	190	180	http://www.broadinstitute.org/gsea/msigdb/cards/SENSORY_PERCEPTION	0001	1000	divergent responding	2
GO ACTIN CYTOSKELETON	Cellular component	129	121	http://www.broadinstitute.org/gsea/msigdb/cards/ACTIN_CYTOSKELETON	0001	1000	divergent responding	8
GO CYTOKINE PRODUCTION	Biological process	73	62	http://www.broadinstitute.org/gsea/msigdb/cards/CYTOKINE_PRODUCTION	0001	1000	divergent responding	5
GO RAS PROTEIN SIGNAL TRANSDUCTION	Biological process	66	62	http://www.broadinstitute.org/gsea/msigdb/cards/RAS_PROTEIN_SIGNAL_TRANSDUCTION	0001	1000	divergent responding	5
GO RAS GTPASE ACTIVATOR ACTIVITY	Molecular function	29	26	http://www.broadinstitute.org/gsea/msigdb/cards/RAS_GTPASE_ACTIVATOR_ACTIVITY	0001	1000	divergent responding	1
GO REGULATION OF CYTOKINE PRODUCTION	Biological process	25	22	http://www.broadinstitute.org/gsea/msigdb/cards/REGULATION_OF_CYTOKINE_PRODUCTION	0001	1000	divergent responding	2
GO INTRAMOLECULAR OXIDOREDUCTASE ACTIVITY	Molecular function	19	18	http://www.broadinstitute.org/gsea/msigdb/cards/INTRAMOLECULAR_OXIDOREDUCTASE_ACTIVITY	0001	1000	divergent responding	0
GO CONDENSED NUCLEAR CHROMOSOME	Cellular component	18	16	http://www.broadinstitute.org/gsea/msigdb/cards/CONDENSED_NUCLEAR_CHROMOSOME	0001	1000	divergent responding	0
KEGG GLIOMA	Human Diseases	65	63	http://www.broadinstitute.org/gsea/msigdb/cards/KEGG_GLIOMA	0001	1000	divergent responding	23
KEGG DRUG METABOLISM CYTOCHROME P450	Metabolism	72	61	http://www.broadinstitute.org/gsea/msigdb/cards/KEGG_DRUG_METABOLISM_CYTOCHROME_P450	0001	1000	divergent responding	0
KEGG ACUTE MYELOID LEUKEMIA	Human Diseases	60	56	http://www.broadinstitute.org/gsea/msigdb/cards/KEGG_ACUTE_MYELOID_LEUKEMIA	0001	1000	divergent responding	22
GO RECEPTOR BINDING	Molecular function	377	347	http://www.broadinstitute.org/gsea/msigdb/cards/RECEPTOR_BINDING	0001	0110	divergent responding	15
GO HYDROLASE ACTIVITY ACTING ON ACID ANHYDRIDES	Molecular function	228	206	http://www.broadinstitute.org/gsea/msigdb/cards/HYDROLASE_ACTIVITY_ACTING_ON_ACID_ANHYDRIDES	0001	0110	divergent responding	9
KEGG CYTOKINE CYTOKINE RECEPTOR INTERACTION	Environmental Information Processing	267	245	http://www.broadinstitute.org/gsea/msigdb/cards/KEGG_CYTOKINE_CYTOKINE_RECEPTOR_INTERACTION	0001	0110	divergent responding	18
KEGG JAK STAT SIGNALING PATHWAY	Environmental Information Processing	155	151	http://www.broadinstitute.org/gsea/msigdb/cards/KEGG_JAK_STAT_SIGNALING_PATHWAY	0001	0110	divergent responding	27
GO EXTRACELLULAR SPACE	Cellular component	245	229	http://www.broadinstitute.org/gsea/msigdb/cards/EXTRACELLULAR_SPACE	0001	0101	divergent responding	1
GO CONTRACTILE FIBER	Cellular component	25	24	http://www.broadinstitute.org/gsea/msigdb/cards/CONTRACTILE_FIBER	0001	0101	divergent responding	2
GO CONTRACTILE FIBER PART	Cellular component	23	22	http://www.broadinstitute.org/gsea/msigdb/cards/CONTRACTILE_FIBER_PART	0001	0101	divergent responding	2
GO PYROPHOSPHATASE ACTIVITY	Molecular function	226	204	http://www.broadinstitute.org/gsea/msigdb/cards/PYROPHOSPHATASE_ACTIVITY	0001	0100	divergent responding	9
GO NUCLEOSIDE TRIPHOSPHATASE ACTIVITY	Molecular function	212	190	http://www.broadinstitute.org/gsea/msigdb/cards/NUCLEOSIDE_TRIPHOSPHATASE_ACTIVITY	0001	0100	divergent responding	8
GO MICROTUBULE BASED PROCESS	Biological process	82	76	http://www.broadinstitute.org/gsea/msigdb/cards/MICROTUBULE_BASED_PROCESS	0001	0100	divergent responding	5
GO REGULATION OF ANATOMICAL STRUCTURE MORPHOGENESIS	Biological process	25	23	http://www.broadinstitute.org/gsea/msigdb/cards/REGULATION_OF_ANATOMICAL_STRUCTURE_MORPHOGENESIS	0001	0100	divergent responding	1
KEGG O GLYCAN BIOSYNTHESIS	Metabolism	30	29	http://www.broadinstitute.org/gsea/msigdb/cards/KEGG_O_GLYCAN_BIOSYNTHESIS	0001	0100	divergent responding	0
BIOCARTA CD40 PATHWAY	Cytokines/Chemokines-Immunology	15	15	http://www.broadinstitute.org/gsea/msigdb/cards/BIOCARTA_CD40_PATHWAY	0001	0100	divergent responding	1
BIOCARTA CERAMIDE PATHWAY	Cell Signaling	22	21	http://www.broadinstitute.org/gsea/msigdb/cards/BIOCARTA_CERAMIDE_PATHWAY	0001	0011	divergent responding	4
GO IDENTICAL PROTEIN BINDING	Molecular function	304	280	http://www.broadinstitute.org/gsea/msigdb/cards/IDENTICAL_PROTEIN_BINDING	0001	0010	divergent responding	24
GO PROTEIN COMPLEX ASSEMBLY	Biological process	167	158	http://www.broadinstitute.org/gsea/msigdb/cards/PROTEIN_COMPLEX_ASSEMBLY	0001	0010	divergent responding	19
GO PROTEIN CATABOLIC PROCESS	Biological process	69	62	http://www.broadinstitute.org/gsea/msigdb/cards/PROTEIN_CATABOLIC_PROCESS	0001	0010	divergent responding	2
GO PEPTIDE RECEPTOR ACTIVITY	Molecular function	53	48	http://www.broadinstitute.org/gsea/msigdb/cards/PEPTIDE_RECEPTOR_ACTIVITY	0001	0010	divergent responding	0
GO PHOSPHOINOSITIDE MEDIATED SIGNALING	Biological process	48	43	http://www.broadinstitute.org/gsea/msigdb/cards/PHOSPHOINOSITIDE_MEDIATED_SIGNALING	0001	0010	divergent responding	2
GO SECRETORY GRANULE	Cellular component	18	18	http://www.broadinstitute.org/gsea/msigdb/cards/SECRETORY_GRANULE	0001	0010	divergent responding	1
KEGG PENTOSE PHOSPHATE PATHWAY	Metabolism	27	26	http://www.broadinstitute.org/gsea/msigdb/cards/KEGG_PENTOSE_PHOSPHATE_PATHWAY	0001	0010	divergent responding	0

## Sheet: Sheet2
4	0001	1110	divergent responding	1				419.38		182.36
4	0001	1110	divergent responding	1				0.062688		4.9726
4	0001	1110	divergent responding	1				-0.542		7.5362
4	0011	1100	divergent responding	1				-0.3354		40.207
4	0001	1110	divergent responding	1				-0.023519		1.959
4	0001	1110	divergent responding	1				-1.5505		14.875
4	0001	1110	divergent responding	1				-0.066231		1.2612
4	0100	1011	divergent responding	1				-2.9046		201.15
4	0001	1110	divergent responding	1				-0.22528		13.078
4	0010	1101	divergent responding	1				-0.95728		3.9199
3	0100	0011	divergent responding	0				39.099		26.132
3	1001	0010	divergent responding	-1				52.804		59.667
3	1001	0010	divergent responding	-1				-0.012442		2.9921
3	1101	0110	divergent responding	-1				92.093		17.603
3	0001	0110	divergent responding	0				-0.07927		2.9768
3	1011	0110	divergent responding	-1				-0.092464		48.672
3	1110	0011	divergent responding	-1				-12.796		94.46
3	1001	0010	divergent responding	-1				1.8612		17.433
3	1001	0010	divergent responding	-1				111.19		3.1077
3	1001	1110	divergent responding	0				105.67		4.601
3	1011	1100	divergent responding	0				-1.1642		38.738
3	0110	0001	divergent responding	0				16.931		125.6
3	0001	0110	divergent responding	0				21.87		155.22
3	1001	1110	divergent responding	0				9.1806		19.94
3	0001	1010	divergent responding	1				-2.2031		3.6996
3	0110	1011	divergent responding	1				-0.00010739		0.096016
3	0110	0001	divergent responding	0				0.13489		2.4984
3	0001	1100	divergent responding	1				1.906		6.7217
3	0011	1000	divergent responding	1				-13.295		187.24
3	1100	0010	divergent responding	-1				0.46584		0.7995
3	0001	1010	divergent responding	1				6.4298		4.0639
3	0110	1000	divergent responding	1				28.505		26.675
3	1010	0001	divergent responding	-1				-0.1243		0.091855
3	0101	1011	divergent responding	1				-0.072861		0.20984
3	1011	0101	divergent responding	-1				138.43		93.966
3	1010	0100	divergent responding	-1				-0.1164		2.5827
3	1010	0100	divergent responding	-1				5.7037		28.077
3	0001	1100	divergent responding	1				-22.295		3.8699
3	0001	1100	divergent responding	1				1.8118		24.834
3	1000	0011	divergent responding	-1				1.5955		27.512
3	0010	1100	divergent responding	1				0.15792		0.82294
3	0010	1100	divergent responding	1				-1.6377		56.626
3	0101	1000	divergent responding	1				-6.0519		3.4041
3	1000	0011	divergent responding	-1				-0.023603		0.23617
3	0001	0110	divergent responding	0				-4.8053		11.764
3	0001	0110	divergent responding	0				-22.081		1.3197
3	1001	0111	divergent responding	-1				-1.5377		2.3824
3	1001	0010	divergent responding	-1				33.858		32.944
3	1100	0001	divergent responding	-1				-0.35388		0.32667
3	0101	0010	divergent responding	0				89.562		120.71
3	0101	0010	divergent responding	0				-8.8596		108.12
3	0100	0011	divergent responding	0				-0.0077766		3.4203
3	1000	0101	divergent responding	-1				-0.0042748		4.0131
3	0011	1000	divergent responding	1				-0.0082917		0.85374
3	0010	1100	divergent responding	1				0.48434		9.1174
3	1001	0100	divergent responding	-1				-12.372		-0.0012478
2	1001	0011	divergent responding	-1				3.6762		10.233
2	0100	0001	divergent responding	0				0.042542		-1.2255
2	1000	0010	divergent responding	-1				4.0321		6.7369
2	1011	1000	divergent responding	0				0.016255		8.7311
2	0001	1011	divergent responding	1				-0.15053		-0.00029003
2	0001	0010	divergent responding	0				0.0027191		-1.0532
2	1000	0010	divergent responding	-1				0.2682		-1.348
2	1101	0111	divergent responding	-1				18.568		46.8
2	0001	0100	divergent responding	0				-0.16879		53.14
2	1000	0010	divergent responding	-1				55.272		84.013
2	1000	0001	divergent responding	-1				7.3921		0.69832
2	0001	0100	divergent responding	0				0.41286		-0.34906
2	1000	1110	divergent responding	0				-0.66629		25.223
2	1000	0100	divergent responding	-1				59.255		78.37
2	0001	1000	divergent responding	1				-0.63312		2.7044
2	0010	1110	divergent responding	1				-0.51161		0.0046807
2	1110	0010	divergent responding	-1				4.5414		1.7164
2	1000	0100	divergent responding	-1				-0.61141		26.822
2	0001	0010	divergent responding	0				-0.29461		1.5161
2	0010	1110	divergent responding	1				-0.31748		2.4099
2	1000	0001	divergent responding	-1				2.9971		5.9233
2	1000	0001	divergent responding	-1				0.52808		1.9701
2	1000	0100	divergent responding	-1				0.15948		0.00059413
2	1000	0001	divergent responding	-1				60.422		52.372
2	0111	1101	divergent responding	1				0.71949		28.125
2	0010	1110	divergent responding	1				0.22069		10.085
2	1010	0110	divergent responding	-1				-0.68368		21.926
2	1000	1011	divergent responding	0				1.5134		0.19694
2	0001	1000	divergent responding	1				-0.085865		-0.061898
2	1110	0010	divergent responding	-1				-0.25964		9.8936
2	0100	1110	divergent responding	1				1.8089		4.835
2	1000	0001	divergent responding	-1				0.16026		19.99
2	1000	0010	divergent responding	-1				-3.3405		1.6851
2	0010	1110	divergent responding	1				1.8357		18.601
2	0100	0010	divergent responding	0				-0.51354		17.242
2	1000	0100	divergent responding	-1				-0.26385		21.201
2	1000	1110	divergent responding	0				-0.20964		13.75
2	1000	0010	divergent responding	-1				0.8627		4.4952
2	1000	0010	divergent responding	-1				-0.37831		1.8925
2	0001	1101	divergent responding	1				-0.20421		5.2726
2	0010	0100	divergent responding	0				-0.088682		4.1267
2	0010	1110	divergent responding	1				0.70668		10.405
2	0001	0100	divergent responding	0				1.6227		2.9561
2	0010	1110	divergent responding	1				2.0454		-0.26162
2	1000	0010	divergent responding	-1				2.0454		-0.26162
2	1000	0010	divergent responding	-1				0.022493		1.6547
2	1000	0010	divergent responding	-1				0.97177		-0.1849
2	1110	1000	divergent responding	0				-0.51508		2.209
2	1000	0010	divergent responding	-1				-1.4826		-0.67796
2	1000	0100	divergent responding	-1				-1.6565		39.667
2	0001	1000	divergent responding	1				-0.29416		-0.26831
2	0001	1000	divergent responding	1				-0.99199		1.5271
2	0001	0010	divergent responding	0				-2.7542		26.198
2	0010	0001	divergent responding	0				-0.084439		0.92755
2	1010	0110	divergent responding	-1				9.4582		4.9617
2	1011	1110	divergent responding	0				3.0048		18.488
2	1000	0010	divergent responding	-1				-0.03297		0.65128
2	1000	0001	divergent responding	-1				0.16777		0.3121
2	0001	0010	divergent responding	0				0.69249		34.478
2	1000	0100	divergent responding	-1				0.23542		20.245
2	1000	0001	divergent responding	-1				-0.50038		9.7947
2	0100	1110	divergent responding	1				-0.19532		24.135
2	0100	0001	divergent responding	0				0.040053		1.2627
2	0100	0001	divergent responding	0				0.26847		5.8587
2	0100	0001	divergent responding	0				1.8354		3.5633
2	0001	0010	divergent responding	0				-0.074386		0.039062
2	0010	0001	divergent responding	0				0.93882		17.727
2	1000	0001	divergent responding	-1				-0.20773		0.50537
2	0010	1110	divergent responding	1				0.0028893		16.542
2	0100	0111	divergent responding	0				-0.57378		5.6807
2	0010	0100	divergent responding	0				-0.062367		1.0609
2	1000	0010	divergent responding	-1				-0.1934		0.64742
2	0100	0010	divergent responding	0				-0.0030947		0.00054294
2	1000	0010	divergent responding	-1				-0.72339		9.9492
2	1000	0100	divergent responding	-1				4.2475		1.7723
2	0010	0001	divergent responding	0				1.5658		6.4333
2	0010	1000	divergent responding	1				13.137		0.026539
2	1000	0010	divergent responding	-1				0.15015		8.8739
2	1000	0010	divergent responding	-1				2.7108		12.244
2	0010	0100	divergent responding	0				-1.7036		1.243
2	0001	1000	divergent responding	1				-2.9339		3.8516
2	0001	0111	divergent responding	0				7.5242		12.823
2	0100	0111	divergent responding	0				0.65774		1.589
2	0001	0100	divergent responding	0				-0.24335		-0.038512
2	0001	1000	divergent responding	1				-0.21631		1.9168
2	0010	0001	divergent responding	0				-0.32201		6.2639
2	1000	0100	divergent responding	-1				0.70084		0.00046674
2	0001	0010	divergent responding	0				0.073071		0.35476
2	0010	1000	divergent responding	1				-0.23962		0.10387
2	0001	1000	divergent responding	1				1.9055		1.6799
2	1000	0100	divergent responding	-1				-1.3537		16.061
2	1000	0100	divergent responding	-1				36.219		4.8229
2	0001	1000	divergent responding	1				-3.654		3.4698
2	1000	0100	divergent responding	-1				5.3634		2.9336
2	0010	1000	divergent responding	1				-0.26547		10.969
2	1000	0100	divergent responding	-1				4.1834		29.231
2	0111	0010	divergent responding	0				8.4552		5.3456
2	1011	1000	divergent responding	0				0.27581		6.2618
2	0100	1000	divergent responding	1				-0.18642		-0.52287
2	1110	1000	divergent responding	0				-0.52625		35.994
2	0100	0010	divergent responding	0				24.423		3.2153
2	0100	0111	divergent responding	0				6.9802		5.0948
2	1110	0010	divergent responding	-1				5.837		23.543
2	0010	0001	divergent responding	0				-0.34282		0.079713
2	0001	1000	divergent responding	1				-0.023799		-0.99843
2	0001	1000	divergent responding	1				-1.3785		-0.048121
2	0100	1000	divergent responding	1				1.0175		28.378
2	0001	1000	divergent responding	1				-0.50547		33.695
2	0100	0010	divergent responding	0				-0.32011		0.37633
2	0001	1011	divergent responding	1				-0.87353		94.798
2	1000	0010	divergent responding	-1				0.098642		-0.37164
2	0010	0100	divergent responding	0				-0.61181		26.32
2	0010	0100	divergent responding	0				6.8915		6.3079
2	1000	1110	divergent responding	0				0.00022717		6.1633
2	0100	1000	divergent responding	1				4.0687		4.832
2	0001	0100	divergent responding	0				0.040409		0.28307
2	0001	0111	divergent responding	0				-0.33641		33.735
2	0001	0010	divergent responding	0				0.0038717		1.8089
2	0010	1000	divergent responding	1				-0.0045673		9.2328
2	0100	0111	divergent responding	0				0.013455		7.4246
2	1000	0001	divergent responding	-1				0.00054974		2.5375
2	1000	0010	divergent responding	-1				-1.4407		3.5052
2	1000	0100	divergent responding	-1				-0.43702		0.31048
2	1011	0010	divergent responding	-1				0.97724		9.305
2	1011	0010	divergent responding	-1				0.0057998		2.7835
2	1110	0111	divergent responding	-1				-0.60703		0.0015352
2	0010	1000	divergent responding	1				27.433		4.1695
2	1000	0100	divergent responding	-1				0.31379		11.027
2	0010	1000	divergent responding	1				-0.9547		3.5742
2	1011	0111	divergent responding	-1				-0.096327		14.444
2	0001	0100	divergent responding	0				-0.94226		0.01522
1	0101	0111	divergent responding	0				2.7995		10.799
1	1010	0010	divergent responding	-1				0.91614		-0.070955
1	1010	1000	divergent responding	0				1.9804		0.0017994
1	1010	1000	divergent responding	0				0.54398		0.002666
1	1100	1101	divergent responding	0				-0.15667		-0.41395
1	0101	0111	divergent responding	0				0.42953		0.0080253
1	1010	1110	divergent responding	0				-0.05437		-0.53676
1	1000	1010	divergent responding	0				6.9641		0.8268
1	0011	0010	divergent responding	0				1.9843		0.40303
1	0001	0101	divergent responding	0				0.52657		0.056247
1	1001	0001	divergent responding	-1				-1.5139		0.075073
1	1000	1010	divergent responding	0				0.87343		14.908
1	0010	0011	divergent responding	0				-0.54408		4.2187
1	1010	0010	divergent responding	-1				-1.0134		2.4305
1	0101	0111	divergent responding	0				-0.54408		4.2187
1	1010	1000	divergent responding	0				-1.0134		2.4305
1	0011	0010	divergent responding	0				-0.22266		-0.22302
1	0110	0010	divergent responding	0				0.00028395		10.003
1	0110	0100	divergent responding	0				-0.0036789		8.5252
1	1100	1000	divergent responding	0				29.961		11.182
1	0011	0010	divergent responding	0				0.018456		-0.48352
1	0011	0010	divergent responding	0				12.194		2.7308
1	0110	0100	divergent responding	0				-0.89096		17.405
1	0100	0110	divergent responding	0				-0.10245		0.58242
1	0001	0101	divergent responding	0				0.076149		0.035876
1	0011	0001	divergent responding	0				0.52781		-0.061383
1	1000	1010	divergent responding	0				0.066028		18.781
1	0001	0101	divergent responding	0				-0.18787		0.69402
1	1010	1000	divergent responding	0				-0.18787		0.69402
1	0101	0100	divergent responding	0				2.0009		5.7656
1	0101	0001	divergent responding	0				0.00023734		-0.36877
1	0101	0111	divergent responding	0				12.847		5.8351
1	1000	1100	divergent responding	0				5.1406		0.44685
1	1100	1000	divergent responding	0				0.15047		-0.0087969
1	1011	1010	divergent responding	0				6.4336		-0.50231
1	0100	0110	divergent responding	0				-0.76008		-0.048499
1	0101	0111	divergent responding	0				0.9694		3.6291
1	1001	1000	divergent responding	0				-0.32287		8.2391
1	0010	0011	divergent responding	0				-0.015002		8.6782
1	0100	0101	divergent responding	0				-1.6107		-0.10466
1	0101	0001	divergent responding	0				-1.0561		1.0136
1	0100	1100	divergent responding	1				-0.80859		-0.12054
1	1001	1000	divergent responding	0				-1.0591		11.777
1	0011	0010	divergent responding	0				0.0012559		-0.29209
1	0010	1010	divergent responding	1				0.00086599		4.4811
1	0010	1010	divergent responding	1				-0.5949		-0.87425
1	1000	1100	divergent responding	0				0.1307		4.3409
1	1100	1000	divergent responding	0				-0.44127		-0.81231
1	0011	0010	divergent responding	0				-2.7802		-1.4916
1	0001	0011	divergent responding	0				-0.0032851		1.3983
1	1000	1100	divergent responding	0				-0.97068		-0.13085
1	1000	1100	divergent responding	0				0.37173		2.0744
1	1100	0100	divergent responding	-1				0.01415		0.27179
								0.47872		-0.11276
								0.51321		10.977
								0.51321		10.977
								0.13556		2.4385
								0.26885		4.2591
								-0.011373		11.629
								-1.0779		0.75627
								1.2214		3.3087
								-0.23516		17.12
								0.00092351		19.142
								-26.686		330.33
								9.0593		9.5773
								0.0058324		-1.2523
								-2.5637		0.26452
								0.76632		102.81
								-0.42467		-0.14057
								2.4326		1.859
								11.029		3.2942
								-9.5187		839.33
								3.6145		7.9096
								-0.5661		-0.078674
								3.3921		0.30781
								-0.076951		5.7329
								-0.11337		0.029063
								-0.44977		1.2419
								0.56632		0.68212
								-0.41264		0.54449
								3.9204		1.6568
								5.6373		2.9973
								-1.5582		38.838
								-0.10813		0.10715
								0.23327		0.22664
								-0.10592		8.0163
								1.7852		18.445
								-0.067694		0.63082
								16.629		5.1438
								-5.493		39.076
								-0.55168		24.988
								-0.16977		0.2501
								3.5075		28.293
								-0.066774		0.1802
								-1.2324		5.5073
								-0.27327		0.56781
								0.022348		9.8242
								-0.0056576		3.2633
								13.17		2.9328
								-0.64811		19.407
								0.12078		14.133
								0.17657		6.2824
								1.2693		10.628
								0.0022316		0.2121
								1.7319		14.827
								-3.2226		5.2849
								-0.81604		0.010497
								-0.0013323		0.57754
								9.8595		2.5719
								0.56237		0.42271
								0.19367		0.17935
								-0.54649		4.3555
								-1.7165		1.0593
								0.12968		-0.32691
								-0.11185		-0.02274
								-1.8864		2.15
								-1.2355		0.10502
								0.29003		18.963
								0.13127		8.9528
								-0.70779		3.4504
								0.00096841		1.2805
								1.7254		2.9954
								-1.0213		1.1416
								0.97823		0.68825
								0.020436		0.00067742
								-0.017039		2.9511
								-1.6427		1.4425
								-0.18244		4.4291
								-0.29279		0.017574
								-1.4049		1.9899
								-0.0064586		15.394
								0.026997		1.4488
								-0.45503		0.12105
								-0.28831		0.35236
								0.24294		30.261
								-0.48095		-0.013904
								0.039005		6.8942
								-0.44299		6.2259
								-0.01325		1.1136
								0.013495		-0.0038554
								0.0055665		-0.013118
								-0.012236		0.039004
								1.6496		-0.011406
								-0.73586		-0.1197
								-0.85866		10.468
								-1.5494		1.3131
								-1.8654		-1.1327
								0.10783		-0.63013
								-0.52733		0.25758
								-0.52548		0.18292
								-0.067853		-0.27344
								-1.2922		-2.51e-05
								-0.037025		1.2011
								-1.0922		-0.13145
								-0.87206		-0.18022
								0.70193		25.336
								0.017396		-1.6199
								2.4249		-0.50863
								0.43077		22.527
								-0.61784		0.46304
								-0.24919		0.94074
								-0.41175		-0.27159
								-0.18271		0.33526
								-1.6543		7.827
								-0.38387		-0.24534
								-0.48217		28.373
								-0.98793		0.14609
								-0.77318		-0.95299
								0.51741		3.9217
								-1.436		-0.00049215
								-0.34345		1.9553
								16.056		6.8525
								3.1846		0.070868
								314.25		1091
								39.824		621.38
								39.824		621.38
								32.702		17.217
								423.66		1387.7
								572.88		104.79
								136.31		107.37
								21.307		52.733
								21.307		52.733
								375.4		161.97
								142.18		39.543
								276.79		469.6
								113.31		65.299
								93.93		14.912
								116.07		20.348
								56.596		174.4
								77.404		148.9
								65.065		105.03
								112.56		190.59
								100.43		26.368
								75.186		135.72
								42.616		21.079
								144.86		72.879
								144.86		72.879
								6.1203		5.3629
								16.864		14.952
								13.904		0.89789
								11.695		21.607
								10.717		0.68451
								17.996		4.1637
								339.77		963.69
								16.198		15.706
								100.79		115.04
								790.8		1374
								471.44		821.29
								60.632		130.21
								69.918		40.439
								1.8758		21.134
								13.42		106.47
								447.4		62.79
								65.67		21.342
								242.05		94.323
								-0.11518		44.94
								0.023189		0.93345
								4.5807		23.511
								3.5817		-1.3865
								4.3011		32.027
								1.996		28.533
								4.428		85.375
								38.413		8.7371
								0.0056233		-0.0011703
								5.299		68.581
								0.65364		-0.4071
								0.18582		2.5307
								1.7242		44.444
								98.181		18.524
								98.181		18.524
								1.4576		1.9165
								58.458		7.332
								27.168		0.55487
								-0.017153		-0.013386
								6.1334		8.8804
								0.12371		20.269
								11.559		0.55439
								370.2		47.389
								39.824		1.2493
								42.131		0.18806
								-0.54058		8.6092
								-0.46356		27.708
								62.71		0.37987
								0.0055377		1.6905
								99.713		69.405
								2.8044		0.16057
								0.3811		27.822
								-0.48219		13.375
								3.1e-06		8.3551
								3.0708		0.17941
								-0.0018983		9.1352
								0.90106		2.522
								2.4319		13.803
								0.66763		-0.00052724
								2.0839		21.544
								6.9505		47.406
								4.0889		2.57
								3.9964		-0.048378
								-0.077733		-0.16604
								12.96		4.6891
								5.0715		1.0169
								-0.25357		-0.34052
								138.44		0.7448
								4.81		0.033673
								0.80077		-0.13493
								0.015608		0.080381
								-0.22278		-0.29336
								0.17122		1.4477
								1.3174		2.4944
								-0.72453		8.6063
								2.1391		-0.3183
								32.959		0.41986
								9.1568		1.8963
								-0.018536		0.12079
								1.1084		12.805
								-0.028775		2.9878
								0.0029288		-0.016631
								-0.1785		0.30031
								0.39215		3.4698
								0.11476		-0.059553
								-0.22703		1.2643
								2.5359		0.90022
								3.3		29.948
								1.5062		0.10666
								32.257		8.4591
								2.7399		2.8852
								-0.33528		0.013692
								5.3734		0.72349
								9.4688		1.2279
								0.73979		1.038
								-0.28962		0.75509
								39.879		5.703
								11.577		6.8292
								2.0324		4.0134
								1.3767		-0.0087761
								0.0016595		-0.09367
								4.5802		14.744
								33.031		12.958
								-0.90168		0.2242
								0.50359		-1.5445
								102.68		31.077
								0.82172		-0.36674
								16.342		22.818
								-0.33946		-0.22398
								41.524		6.8039
								120.9		25.031
								0.020891		0.03859
								-0.032711		0.40365
								0.33359		10.018
								46.571		10.222
								18.473		2.9572
								29.683		18.105
								3.2073		6.3377
								1.5337		0.68665
								0.22688		-0.7614
								24.026		0.271
								2.7659		-0.10915
								0.019695		-1.0772
								-0.12515		-0.66415
								-1.0158		-0.71984
								14.389		10.863
								-0.010389		0.011189
								0.55994		0.016333
								4.2376		6.3927
								82.367		17.936
								23.241		0.17818
								-0.098531		-0.88476
								-0.35252		0.068067
								-0.19388		-1.1084
								13.021		-0.46564
								2.8638		0.012723
								0.098186		3.7753
								21.864		-0.30947
								0.76435		-0.17668
								-0.014173		-1.6694
								0.11169		0.47936
								0.002098		-0.55598
								18.918		-0.061694
								0.18253		-0.13086
								-0.66598		-0.0080761
								1.8111		0.18488
								-2.5743		0.057571
								1.4059		2.428
								0.31113		6.9546
								1.9512		0.010002
								1.0899		3.3028
								1.3885		2.6054
								0.012843		0.77996
								33.976		0.93453
								8.0771		14.781
								-0.16064		-0.49437
								10.409		-0.67507
								0.23672		7.368
								-0.62223		20.349
								4.7127		-0.2587
								1.8212		0.021384
								-0.053958		-0.083421
								-0.086678		-0.21304
								0.061184		2.5017
								0.12464		-0.0076472
								0.77981		3.9459
								0.91924		0.76191
								0.47667		0.061696
								0.25479		-0.0032272
								1.064		-0.05264
								0.0062359		-1.1049
								-0.55447		-0.40375
								0.014714		0.023493
								-0.96966		-0.13589
								5.944		-0.0046858
								-0.092415		-0.020504
								33.278		7.4484
								-0.092415		-0.020504
								-0.092415		-0.020504
								0.70329		16.02
								0.081343		1.7217
								7.0259		-0.58526
								-0.91435		-0.5607
								5.7607		0.00010495
								17.642		9.1207
								-0.35517		-0.0611
								6.3124		1.7926
								4.197		12.81
								-0.0022212		2.9221
								4.8277		12.437
								-0.32531		-0.30651
								-0.030186		3.4368
								0.28162		-0.0016483
								0.34589		-0.022039
								4.0571		-0.11793
								1.3077		13.981
								1.4702		84.9
								-0.00058874		0.49143
								27.597		21.179
								-0.00013809		1.2518
								2.3331		29.435
								8.4507		5.6499
								25.052		3.8282
								11.265		7.4717
								-0.83587		2.4183
								0.65268		0.0002121
								10.516		5.297
								49.201		1.3468
								18.479		-0.47443
								29.191		23.035
								-1.8877		-0.69092
								1.7576		4.5401
								2.4676		0.24559
								-0.66699		11.726
								-0.82952		135.09
								12.494		52.969
								-0.0091227		4.4224
								11.057		41.253
								0.48568		11.666
								3.7575		18.088
								0.16612		33.373
								0.11909		32.591
								0.46209		23.519
								-0.39518		6.1031
								-0.02967		8.8707
								5.7299		32.706
								-0.089666		10.32
								26.13		140.11
								116.05		23.289
								26.35		160.39
								0.025179		4.8076
								5.3361		68.898
								22.252		1.858
								55.87		-1.0364
								10.767		1.1013
								18.024		71.195
								7.5016		0.12553
								12.334		50.842
								19.225		1.4045
								17.307		1.0594
								0.010709		-1.3805
								-0.066319		51.829
								5.4706		132.07
								-3.09		0.0046165
								0.90333		-1.3695
								-0.032869		-0.23989
								-0.26977		-0.16267
								3.739		1.0015
								24.096		1.1624
								1.2838		2.1381
								5.3462		6.3632
								-13.015		-1.1666
								3.0302		-0.1036
								-0.73163		-0.13426
								-0.79565		-0.48733
								2.1402		0.92129
								-1.4947		2.121
								-0.80382		-0.35821
								-11.468		-1.8047
								-2.7866		-0.55768
								-0.6762		1.478
								2.388		-0.0003032
								1.6412		-0.044699
								1.7271		5.742
								0.50818		0.62299
								93.18		84.057
								-19.313		-2.1159
								20.045		34.439
								-0.15744		0.010311
								0.098121		-0.50647
								-3.7426		-0.92897
								51.09		35.196
								0.055514		-0.42466
								-0.03671		0.33716
								0.050877		-1.3197
								0.015229		2.1279
								0.096481		-0.068847
								0.63366		-0.13059
								-0.22522		-2.3541
								-0.32621		8.6662
								-3.2746		1.1714
								5.0682		-1.1246
								0.74203		14.5
								0.45511		0.16707
								-0.24663		2.0952
								0.21337		-0.02645
								2040.7		1385.1
								-0.88715		0.5887
								6.075		0.040268
								1.0287		0.50698
								17.341		21.293
								-0.59928		0.31128
								-0.049872		2.791
								-4.7371		-1.1645
								-0.71369		0.059355
								0.31273		-0.032393
								-0.82221		-1.2347
								0.0032218		2.4817
								-1.0189		27.007
								-0.98433		1.3573
								-0.14907		0.94906
								-2.983		3.1075
								0.11252		-0.68145
								-4.8145		-2.0824
								4.0377		-0.003204
								0.10604		-1.313
								153.79		30.202
								0.85894		0.0036352
								6.3296		5.3848
								-0.07028		0.14476
								-4.5696		-4.0185
								-0.015029		-1.4485
								0.19136		-0.85864
								-1.871		0.51538
								4.7157		-0.47344
								83.196		27.688
								17.665		3.6055
								-1.2813		-0.48637
								6.4837		-0.87539
								-2.3504		-0.048266
								18.743		83.68
								-0.0011444		18.907
								0.3409		10.671
								0.4328		0.19834
								0.0039863		-0.034608
								-1.1587		0.094342
								0.30834		1.6696
								-0.06379		0.02782
								-5.3354		8.8291
								-1.3283		0.1115
								-1.3127		2.5364
								-0.47578		-0.15282
								-1.3342		4.0835
								-2.7258		-2.8065
								8.2258		6.6733
								-0.14646		-0.90815
								1.8735		1.0206
								0.30141		2.2307
								1.0017		19.834
								-0.63092		4.0352
								6.5567		1.2333
								0.9341		-1.0885
								-0.028665		-0.013689
								-0.00042392		7.1294
								0.57809		10.468
								-0.025652		-0.091621
								-1.7387		1.1646
								-0.47725		-1.4914
								0.31742		2.7642
								-1.5098		2.0931
								-1.1092		0.028905
								-9.23e-05		1.2991
								-2.9993		0.71928
								0.18972		11.495
								0.61131		9.9703
								-0.75806		2.5298
								1.7603		0.075223
								0.046738		-0.043736
								0.50216		-0.0026113
								-2.5841		0.21932
								-1.5259		-0.11623
								-0.029564		0.40203
								-6.4188		-1.8842
								2.3593		18.448
								4.1471		10.899
								-1.6368		-0.11318
								22.989		20.751
								-0.24477		0.093755
								-2.1114		3.0229
								1.3497		0.37601
								0.095703		-0.28412
								0.070499		8.8419
								0.87133		1.2475
								-0.2054		-1.3413
								-0.28008		17.293
								0.69509		1.5324
								0.15917		-0.052857
								-0.061299		2.5544
								-3.3703		0.010514
								-1.626		4.0767
								-3.1501		-2.3681
								0.026872		-1.2419
								0.073305		-0.19201
								-1.9748		1.3282
								8.1963		0.76921
								-0.13768		0.13315
								23.428		21.226
								-0.36821		0.21437
								-0.30867		-0.85985
								-0.45592		3.9931
								0.075038		8.4827
								0.075038		8.4827
								-0.32089		-1.1845
								0.050468		-0.44479
								-4.4248		0.21668
								-0.76936		-0.98076
								-0.99964		1.1375
								-0.25271		0.57584
								13.387		2.7498
								-0.75639		-0.0094
								-0.38785		5.146
								-0.11657		0.40595
								-0.85613		-0.0090106
								0.48091		-0.14194
								-0.089176		1.8593
								-0.77948		0.62752
								0.014406		7.8292
								13.404		0.21834
								-0.031385		6.0967
								0.65168		15.23
								-2.1242		-0.0030146
								0.0034243		-0.0058641
								0.39754		4.8201
								4.6417		15.842
								7.4813		1.9832
								-0.37338		2.688
								-0.025428		0.0193
								-1.8382		0.023747
								2.0892		16.256
								-0.44408		9.712
								-0.067228		0.069529
								5.8581		2.537
								-0.53564		5.96
								-0.79575		0.056114
								16.674		23.349
								-1.1879		1.0017
								2.192		2.1308
								-0.69484		0.67736
								-0.05085		0.12115
								1.4821		4.7363
								0.54236		-0.043127
								0.43018		-0.55605
								2.5035		-0.0020279
								-0.14565		-0.23231
								-0.50981		1.3157
								-0.070713		-0.056691
								-1.2761		3.8959
								-0.021333		-0.42276
								0.064627		0.00020521
								0.72339		2.0869
								0.33054		1.5767
								0.90361		0.38289
								-0.15107		1.3699
								12.227		2.4642
								-0.16593		1.9916
								-0.32979		-0.77918
								-0.37068		0.68273
								-0.37068		0.68273
								-0.20235		2.15e-05
								-2.2767		0.36341
								-1.1736		8.492
								-1.6583		-0.088498
								-0.80521		-1.3218
								-0.037363		2.0076
								-0.20235		2.15e-05
								2.0162		-0.44546
								-0.091491		1.6192
								-0.6932		-0.2181
								-0.85092		0.49004
								1.1803		0.36722
								-1.0915		-0.11855
								-0.087664		1.4879
								2.4758		4.4631
								14.715		0.66835
								-0.4029		0.85444
								2.7679		1.9828
								-1.0604		0.00017143
								-1.8257		0.14589
								0.0057776		-1.074
								-0.51529		23.043
								0.087818		71.317
								0.0031775		0.014125
								-0.29732		-0.77271
								-0.46828		0.24749
								-0.91103		-0.21922
								0.32559		0.19296
								0.45634		0.00060015
								-0.5934		-0.13205
								-1.1341		-0.17196
								16.84		7.6789
								-0.0013537		-1.0171
								-0.42422		0.1445
								0.0056114		17.753
								8.6315		0.55717
								1.3967		3.4566
								-0.0035221		0.0025974
								1.2509		2.8494
								0.11041		1.4733
								-0.28346		1.865
								-0.040416		5.54
								1.0225		2.7356
								0.0025199		1.4375
								-0.61066		0.055715
								-0.12099		5.8682
								-0.19376		0.056761
								-0.70363		0.10154
								-0.63696		0.18167
								70.241		85.15
								-0.34814		-0.090598
								-1.153		-0.0056252
								0.011055		0.37051
								0.26142		1.2338
								0.013243		-0.80482
								55.962		67.47
								-0.12275		3.7349
								-1.6506		-0.51418
								-1.6643		-0.018576
								-0.11243		-0.090908
								-0.044091		0.27653
								-1.2733		0.00016003
								-0.29378		0.46125
								-0.39757		-1.5991
								-0.093354		0.017174
								1.3802		-0.18985
								-0.19083		2.2962
								9.7438		2.4327
								0.035286		0.9867
								-0.036044		-0.061552
								7.7916		12.319
								-0.031501		11.063
								2.4051		2.6457
								-1.3394		-0.017988
								-1.0317		7.3383
								-0.00279		0.64371
								-0.0044116		0.11343
								0.017776		1.1666
								-1.1506		0.0074606
								-0.016676		-0.55229
								-2.1113		0.0022267
								1.4414		1.3212
								-0.23997		-0.1458
								-0.54067		-0.87826
								3.9244		-0.68508
								0.0076278		-0.0020802
								-0.00097324		0.57191
								-1.7421		0.0055689
								-0.34816		0.92178
								-0.63087		-1.1268
								-2.4507		0.149
								-0.12179		-0.085435
								39.232		0.34441
								-0.69218		-0.20057
								1.3553		-1.1018
								-0.018862		-0.037721
								-0.44372		13.138
								-0.44372		13.138
								1.0469		12.753
								0.078		5.0299
								-1.1344		0.19308
								0.73307		-0.016155
								-0.15287		1.7884
								-0.029704		0.003061
								7.2208		12.431
								-1.1777		-0.87048
								0.085611		1.1201
								5.228		1.5124
								-0.030239		-0.82988
								-1.3839		0.00023916
								-0.13529		1.5824
								-0.2143		0.016636
								-0.49695		-0.059929
								-0.55268		-0.064493
								-1.344		2.0502
								-0.014329		0.3106
								-0.80532		-0.21656
								-0.29238		-0.19969
								-1.7085		0.26977
								-0.025376		-0.33772
								-0.013545		0.90541
								1.0894		0.06725
								-1.342		-0.066654
								-0.080893		-0.30776
								-0.00078819		0.13074
								0.3427		0.15177
								6.2259		0.47057
								-0.35169		0.27714
								-0.44268		-0.003842
								-0.10283		5.9475
								0.028262		1.0183
								-0.51846		0.65116
								0.4108		-0.022372
								16.922		9.9652
								24.784		58.48
								1.1847		0.0010211
								2938.8		1969.9
								11.433		14.353
								6.0834		-0.015251
								-0.61765		5.0827
								0.087325		-0.025333
								0.00070064		0.068757
								0.33275		1.5
								0.80914		-0.17558
								0.25442		-0.18057
								17.767		20.003
								24.85		6.2269
								-0.93293		-0.49037
								13.361		0.57563
								0.0026074		5.7567
								-2.0425		0.74143
								-0.6298		34.983
								8.5724		-0.067671
								-0.36659		8.3586
								57.689		176.42
								0.004251		-0.1461
								1.2007		-0.013142
								0.43888		1.0056
								0.013814		0.98984
								0.45791		-0.055867
								-0.14121		-2.654
								0.00014929		-0.46078
								-0.030955		7.7657
								-0.73887		0.20918
								-0.041801		-0.0048885
								-0.64233		4.5395
								4.6384		4.4351
								-0.69957		1.5441
								-0.70152		20.245
								-0.41414		0.67441
								-0.1088		-0.19132
								-0.27616		-0.12101
								3.2509		4.9772
								-0.29046		-0.024619
								0.050259		3.7875
								2.8111		1.8353
								-0.2816		0.11918
								3.1978		-0.17763
								-4.4107		-0.10338
								1.6106		-0.27392
								-0.54997		8.4168
								-1.442		1.2131
								0.5104		7.0578
								-0.26042		0.63502
								0.0013929		-0.74526
								-0.10375		-1.2063
								1.7522		3.2389
								0.53456		0.19855
								-0.87194		-0.35516
								0.70713		-0.35381
								2.1672		-0.49226
								0.016449		-0.073492
								-0.2063		0.092069
								-0.39866		-0.30549
								-0.013037		-0.077853
								0.021345		-1.3581
								-1.452		0.041666
								-0.17806		-0.14807
								-0.32811		-0.015299
								-0.31638		0.37036
								-0.93642		-0.049325
								-0.022825		1.3988
								-0.51654		-1.7357
								15.014		1.1662
								0.66251		4.8563
								1.0905		0.13448
								70.871		-0.21231
								-1.4969		0.017052
								0.1426		0.56885
								0.67765		0.38232
								0.46424		-0.13099
								0.46544		9.891
								44.817		61.15
								13.712		38.371
								0.28908		53.011
								52.28		54.215
								276.82		119.49
								280.18		109.98
								91.313		3.5797
								85.591		3.0851
								0.27085		155.42
								-0.00041198		28.655
								3.0651		2.8147
								6.6904		109.15
								33.17		23.457
								50.709		450.34
								0.9348		40.806
								66.87		18.785
								37.187		81.712
								82.324		52.773
								486.09		164.99
								9.2675		10.318
								13.387		28.87
								32.846		27.191
								0.16992		62.376
								10.826		262.1
								-0.016348		42.673
								0.30421		21.141
								16.956		30.353
								12.073		12.16
								830.91		1011
								0.10368		2.1875
								7.6031		26.578
								5.7157		25.079
								2.1031		4.3722
								118.92		52.732
								4.8419		0.79028
								-0.25045		19.076
								0.21545		4.5649
								9.7722		22.092
								51.698		18.599
								149.19		15.425
								1.9513		108.32
								-2.6807		12.638
								0.20475		24.776
								919.47		198.53
								0.63342		6.8899
								25.287		16.26
								128.18		26.292
								0.0060647		0.99923
								615.58		113.46
								2.5318		0.90718
								8.446		2.8629
								2.3096		0.24668
								-2.0598		4.4671
								8.0189		0.4204
								7.0171		11.22
								864.99		314.14
								32.819		247.37
								0.20481		-0.43466
								51.147		1.7148
								0.076924		43.454
								40.313		21.842
								3.9159		24.446
								202.7		290.1
								-0.53092		0.97317
								384.07		82.727
								-0.48098		13.658
								101.68		131.3
								-0.74477		18.661
								171.15		20.597
								1.9683		11.305
								-1.0014		3.2312
								60.323		16.969
								0.0023695		11.951
								-0.11132		78.615
								68.667		73.677
								1.0592		3.1767
								6.279		1.0161
								0.16599		-0.012192
								185.38		42.21
								-0.0036295		13.532
								2.7616		4.9653
								182.38		35.945
								-0.088762		30.345
								0.39363		28.922
								0.94689		29.62
								-0.48706		5.1315
								2.0124		11.889
								-3.2419		2.1786
								6.7499		1.0477
								21.213		41.865
								-0.46053		11.718
								0.022908		3.1151
								3.2161		4.1356
								2.1928		2.36
								0.34703		1.7555
								2.2651		25.069
								4.7267		8.6976
								-0.60994		5.9958
								4.2594		3.9473
								17.093		23.886
								0.012345		5.7852
								-0.29738		13.958
								0.61582		22.539
								-0.0022402		38.082
								0.17758		2.0676
								0.14453		0.0093669
								-4.254		13.854
								38.047		9.1765
								0.20625		-0.025472
								9.846		31.213
								7.8174		2.2626
								3.5001		34.54
								-0.18747		0.4224
								11.175		167.06
								11.175		167.06
								-0.056323		0.24368
								5.808		0.48422
								-0.008303		6.9373
								12.871		0.97082
								2.3468		2.4466
								6.4479		0.13614
								26.156		16.264
								108.09		0.36177
								17.389		1.1509
								18.485		5.9758
								-0.011716		10.344
								-0.58221		0.62885
								2.3234		1.7462
								0.042412		11.525
								-0.50729		-0.43817
								2.3247		8.0398
								3.5145		5.0647
								1.9189		-0.88805
								2.0968		0.047032
								0.12928		0.00045812
								5.8314		0.36489
								65.819		11.056
								-0.057548		1.2944
								7.6135		3.6661
								-0.78365		0.0040598
								0.28044		3.2457
								1.3372		8.1888
								2.5644		4.4868
								-0.78038		8.2035
								-0.11566		-0.03649
								42.437		23.305
								0.049393		1.634
								0.32743		8.7575
								0.0066725		0.012416
								2.7522		11.521
								-0.51231		11.915
								0.75958		9.3624
								49.534		39.049
								4.1722		0.52001
								0.060865		-0.69668
								0.054314		0.63832
								13.369		13.501
								11.044		1.5688
								9.1256		0.011878
								0.63034		2.1238
								0.013242		3.0929
								0.70224		0.63155
								14.792		3.1912
								0.77116		-0.13646
								4.1791		2.5146
								0.10977		-0.2676
								0.52255		0.053289
								48.963		53.699
								1.8428		-0.13813
								-0.089025		2.6701
								2.7386		196.52
								10.923		331.09
								0.0087099		9.7918
								1.2789		0.26165
								1.1916		43.821
								1.0087		39.446
								321.68		69.084
								-0.025928		0.45739
								-0.15724		0.63204
								0.054583		0.39786
								4.0117		2.0045
								10.232		40.639
								105.65		167.09
								6.2903		-0.009519
								2.2235		0.16952
								39.635		419.23
								47.009		15.838
								0.045208		0.23132
								18.67		0.43329
								0.2155		1.9703
								-0.70852		4.2147
								0.51083		20.462
								-0.059297		20.628
								-0.08594		2.9592
								0.37908		2.1366
								0.46884		27.985
								6.5412		55.157
								0.12995		9.8273
								-0.33156		2.4711
								81.908		158.74
								15.195		4.4839
								1.6191		1.9628
								0.54259		0.010969
								-0.010029		1.8447
								-0.84221		8.7928
								100.37		41.921
								15.735		118.84
								6.6504		32.558
								-0.092344		3.1593
								2.3878		0.20418
								2.074		21.468
								-0.0034647		2.7739
								-0.17857		-1.1509
								7.6024		1.1718
								34.373		15.178
								-0.053607		0.0042321
								0.21409		0.33448
								0.78705		2.1324
								1.5159		3.4316
								3.6575		4.0579
								-0.83104		8.0795
								-1.1142		3.0525
								9.9097		5.0607
								-0.25535		0.23669
								60.782		0.85536
								-0.20274		-0.00039396
								9.5553		69.692
								0.028608		-0.04967
								-0.051721		5.4678
								10.445		0.77213
								0.0024304		-0.19737
								7.8708		2.782
								4.5782		-0.33071
								0.18614		0.055309
								13.932		0.98356
								9.8128		3.6227
								-0.16227		0.5134
								0.39017		-0.099965
								0.027359		1.9571
								9.4901		0.47358
								0.015831		26.249
								12.051		212.55
								0.95419		1.5589
								13.223		6.9313
								-0.73411		5.6133
								-0.11173		4.6754
								13.011		23.681
								1.5213		-0.63538
								0.69796		23.526
								98.825		134.8
								-0.46109		0.43503
								4.3819		3.6012
								78.634		53.09
								78.634		53.09
								0.87809		-0.087882
								0.010585		4.8296
								1.1154		72.693
								2.5551		6.0358
								-0.82624		0.7831
								-0.72753		0.15086
								-0.059319		0.10799
								1.7526		0.53512
								-0.31116		5.6353
								-0.58458		-0.64748
								0.12909		2925.9

## Sheet: Sheet3
terms	OMIC gene counts		tumor specific responding	61		normal specific responding	76		no responding	39		consistent responding	10		divergent responding	55
tumor specific responding	61		tumor specific responding	49		normal specific responding	46		no responding	38		consistent responding	7		divergent responding	52
tumor specific responding	24		tumor specific responding	35		normal specific responding	39		no responding	33		consistent responding	5		divergent responding	52
tumor specific responding	3		tumor specific responding	35		normal specific responding	28		no responding	33		consistent responding	5		divergent responding	44
tumor specific responding	4		tumor specific responding	33		normal specific responding	28		no responding	30		consistent responding	4		divergent responding	38
tumor specific responding	22		tumor specific responding	33		normal specific responding	28		no responding	27		consistent responding	4		divergent responding	38
tumor specific responding	3		tumor specific responding	32		normal specific responding	25		no responding	26		consistent responding	4		divergent responding	37
tumor specific responding	19		tumor specific responding	29		normal specific responding	24		no responding	24		consistent responding	3		divergent responding	35
tumor specific responding	6		tumor specific responding	27		normal specific responding	23		no responding	24		consistent responding	3		divergent responding	34
tumor specific responding	18		tumor specific responding	27		normal specific responding	22		no responding	23		consistent responding	3		divergent responding	31
tumor specific responding	16		tumor specific responding	27		normal specific responding	22		no responding	21		consistent responding	2		divergent responding	31
tumor specific responding	5		tumor specific responding	26		normal specific responding	22		no responding	20		consistent responding	2		divergent responding	30
tumor specific responding	26		tumor specific responding	26		normal specific responding	19		no responding	20		consistent responding	2		divergent responding	28
tumor specific responding	19		tumor specific responding	24		normal specific responding	18		no responding	18		consistent responding	2		divergent responding	27
tumor specific responding	33		tumor specific responding	23		normal specific responding	15		no responding	17		consistent responding	2		divergent responding	26
tumor specific responding	19		tumor specific responding	23		normal specific responding	15		no responding	17		consistent responding	2		divergent responding	25
tumor specific responding	27		tumor specific responding	23		normal specific responding	14		no responding	16		consistent responding	2		divergent responding	24
tumor specific responding	7		tumor specific responding	23		normal specific responding	12		no responding	16		consistent responding	1		divergent responding	23
tumor specific responding	6		tumor specific responding	23		normal specific responding	12		no responding	15		consistent responding	1		divergent responding	22
tumor specific responding	27		tumor specific responding	22		normal specific responding	12		no responding	15		consistent responding	0		divergent responding	22
tumor specific responding	27		tumor specific responding	21		normal specific responding	12		no responding	15		consistent responding	0		divergent responding	21
tumor specific responding	17		tumor specific responding	21		normal specific responding	12		no responding	15		consistent responding	0		divergent responding	21
tumor specific responding	23		tumor specific responding	21		normal specific responding	11		no responding	14		consistent responding	0		divergent responding	21
tumor specific responding	23		tumor specific responding	19		normal specific responding	11		no responding	14		consistent responding	0		divergent responding	20
tumor specific responding	12		tumor specific responding	19		normal specific responding	10		no responding	13		consistent responding	0		divergent responding	20
tumor specific responding	10		tumor specific responding	19		normal specific responding	10		no responding	13		consistent responding	0		divergent responding	19
tumor specific responding	14		tumor specific responding	18		normal specific responding	10		no responding	13					divergent responding	19
tumor specific responding	8		tumor specific responding	18		normal specific responding	10		no responding	12					divergent responding	19
tumor specific responding	2		tumor specific responding	18		normal specific responding	9		no responding	12					divergent responding	18
tumor specific responding	3		tumor specific responding	18		normal specific responding	9		no responding	12					divergent responding	17
tumor specific responding	15		tumor specific responding	17		normal specific responding	9		no responding	11					divergent responding	17
tumor specific responding	1		tumor specific responding	16		normal specific responding	9		no responding	11					divergent responding	16
tumor specific responding	16		tumor specific responding	16		normal specific responding	9		no responding	11					divergent responding	16
tumor specific responding	16		tumor specific responding	16		normal specific responding	9		no responding	11					divergent responding	15
tumor specific responding	3		tumor specific responding	16		normal specific responding	9		no responding	11					divergent responding	15
tumor specific responding	26		tumor specific responding	16		normal specific responding	9		no responding	10					divergent responding	15
tumor specific responding	16		tumor specific responding	15		normal specific responding	8		no responding	10					divergent responding	15
tumor specific responding	7		tumor specific responding	15		normal specific responding	8		no responding	10					divergent responding	15
tumor specific responding	1		tumor specific responding	14		normal specific responding	8		no responding	10					divergent responding	14
tumor specific responding	4		tumor specific responding	14		normal specific responding	8		no responding	10					divergent responding	14
tumor specific responding	4		tumor specific responding	14		normal specific responding	8		no responding	10					divergent responding	14
tumor specific responding	18		tumor specific responding	14		normal specific responding	8		no responding	9					divergent responding	14
tumor specific responding	5		tumor specific responding	14		normal specific responding	7		no responding	9					divergent responding	13
tumor specific responding	5		tumor specific responding	13		normal specific responding	7		no responding	9					divergent responding	12
tumor specific responding	11		tumor specific responding	13		normal specific responding	7		no responding	9					divergent responding	12
tumor specific responding	4		tumor specific responding	12		normal specific responding	7		no responding	9					divergent responding	12
tumor specific responding	1		tumor specific responding	12		normal specific responding	7		no responding	9					divergent responding	12
tumor specific responding	4		tumor specific responding	12		normal specific responding	7		no responding	9					divergent responding	11
tumor specific responding	9		tumor specific responding	11		normal specific responding	7		no responding	9					divergent responding	11
tumor specific responding	10		tumor specific responding	11		normal specific responding	6		no responding	9					divergent responding	11
tumor specific responding	18		tumor specific responding	11		normal specific responding	6		no responding	9					divergent responding	11
tumor specific responding	3		tumor specific responding	11		normal specific responding	6		no responding	9					divergent responding	11
tumor specific responding	2		tumor specific responding	11		normal specific responding	6		no responding	9					divergent responding	10
tumor specific responding	3		tumor specific responding	10		normal specific responding	6		no responding	9					divergent responding	10
tumor specific responding	4		tumor specific responding	10		normal specific responding	6		no responding	9					divergent responding	10
tumor specific responding	1		tumor specific responding	10		normal specific responding	6		no responding	8					divergent responding	10
tumor specific responding	1		tumor specific responding	10		normal specific responding	6		no responding	8					divergent responding	10
tumor specific responding	5		tumor specific responding	10		normal specific responding	6		no responding	8					divergent responding	10
tumor specific responding	4		tumor specific responding	10		normal specific responding	5		no responding	8					divergent responding	9
tumor specific responding	8		tumor specific responding	10		normal specific responding	5		no responding	8					divergent responding	9
tumor specific responding	4		tumor specific responding	9		normal specific responding	5		no responding	8					divergent responding	9
tumor specific responding	2		tumor specific responding	9		normal specific responding	5		no responding	8					divergent responding	9
tumor specific responding	4		tumor specific responding	9		normal specific responding	5		no responding	7					divergent responding	9
tumor specific responding	4		tumor specific responding	9		normal specific responding	5		no responding	7					divergent responding	9
tumor specific responding	8		tumor specific responding	9		normal specific responding	5		no responding	7					divergent responding	9
tumor specific responding	3		tumor specific responding	9		normal specific responding	5		no responding	7					divergent responding	9
tumor specific responding	14		tumor specific responding	9		normal specific responding	5		no responding	7					divergent responding	8
tumor specific responding	4		tumor specific responding	9		normal specific responding	5		no responding	7					divergent responding	8
tumor specific responding	0		tumor specific responding	9		normal specific responding	5		no responding	7					divergent responding	8
tumor specific responding	3		tumor specific responding	8		normal specific responding	4		no responding	7					divergent responding	8
tumor specific responding	14		tumor specific responding	8		normal specific responding	4		no responding	7					divergent responding	8
tumor specific responding	3		tumor specific responding	8		normal specific responding	4		no responding	7					divergent responding	8
tumor specific responding	8		tumor specific responding	8		normal specific responding	4		no responding	7					divergent responding	8
tumor specific responding	8		tumor specific responding	8		normal specific responding	4		no responding	7					divergent responding	8
tumor specific responding	3		tumor specific responding	8		normal specific responding	4		no responding	6					divergent responding	8
tumor specific responding	6		tumor specific responding	8		normal specific responding	4		no responding	6					divergent responding	8
tumor specific responding	0		tumor specific responding	8		normal specific responding	4		no responding	6					divergent responding	8
tumor specific responding	2		tumor specific responding	8		normal specific responding	4		no responding	6					divergent responding	7
tumor specific responding	2		tumor specific responding	8		normal specific responding	4		no responding	6					divergent responding	7
tumor specific responding	1		tumor specific responding	8		normal specific responding	4		no responding	6					divergent responding	7
tumor specific responding	7		tumor specific responding	8		normal specific responding	4		no responding	6					divergent responding	7
tumor specific responding	6		tumor specific responding	8		normal specific responding	4		no responding	6					divergent responding	7
tumor specific responding	5		tumor specific responding	8		normal specific responding	4		no responding	6					divergent responding	7
tumor specific responding	6		tumor specific responding	8		normal specific responding	3		no responding	6					divergent responding	7
tumor specific responding	0		tumor specific responding	8		normal specific responding	3		no responding	6					divergent responding	7
tumor specific responding	8		tumor specific responding	8		normal specific responding	3		no responding	6					divergent responding	7
tumor specific responding	3		tumor specific responding	8		normal specific responding	3		no responding	6					divergent responding	7
tumor specific responding	11		tumor specific responding	8		normal specific responding	3		no responding	5					divergent responding	6
tumor specific responding	3		tumor specific responding	8		normal specific responding	3		no responding	5					divergent responding	6
tumor specific responding	7		tumor specific responding	7		normal specific responding	3		no responding	5					divergent responding	6
tumor specific responding	6		tumor specific responding	7		normal specific responding	3		no responding	5					divergent responding	6
tumor specific responding	2		tumor specific responding	7		normal specific responding	3		no responding	5					divergent responding	6
tumor specific responding	2		tumor specific responding	7		normal specific responding	3		no responding	5					divergent responding	6
tumor specific responding	4		tumor specific responding	7		normal specific responding	3		no responding	5					divergent responding	6
tumor specific responding	2		tumor specific responding	7		normal specific responding	3		no responding	5					divergent responding	6
tumor specific responding	7		tumor specific responding	7		normal specific responding	3		no responding	5					divergent responding	6
tumor specific responding	6		tumor specific responding	7		normal specific responding	3		no responding	5					divergent responding	6
tumor specific responding	7		tumor specific responding	7		normal specific responding	3		no responding	5					divergent responding	6
tumor specific responding	14		tumor specific responding	7		normal specific responding	3		no responding	5					divergent responding	5
tumor specific responding	3		tumor specific responding	7		normal specific responding	3		no responding	5					divergent responding	5
tumor specific responding	2		tumor specific responding	7		normal specific responding	3		no responding	5					divergent responding	5
tumor specific responding	2		tumor specific responding	7		normal specific responding	3		no responding	5					divergent responding	5
tumor specific responding	3		tumor specific responding	7		normal specific responding	3		no responding	5					divergent responding	5
tumor specific responding	5		tumor specific responding	7		normal specific responding	3		no responding	5					divergent responding	5
tumor specific responding	9		tumor specific responding	7		normal specific responding	2		no responding	5					divergent responding	5
tumor specific responding	1		tumor specific responding	7		normal specific responding	2		no responding	5					divergent responding	5
tumor specific responding	0		tumor specific responding	6		normal specific responding	2		no responding	5					divergent responding	5
tumor specific responding	5		tumor specific responding	6		normal specific responding	2		no responding	5					divergent responding	5
tumor specific responding	1		tumor specific responding	6		normal specific responding	2		no responding	5					divergent responding	5
tumor specific responding	0		tumor specific responding	6		normal specific responding	2		no responding	4					divergent responding	5
tumor specific responding	1		tumor specific responding	6		normal specific responding	2		no responding	4					divergent responding	5
tumor specific responding	6		tumor specific responding	6		normal specific responding	2		no responding	4					divergent responding	5
tumor specific responding	5		tumor specific responding	6		normal specific responding	2		no responding	4					divergent responding	5
tumor specific responding	0		tumor specific responding	6		normal specific responding	2		no responding	4					divergent responding	5
tumor specific responding	0		tumor specific responding	6		normal specific responding	2		no responding	4					divergent responding	4
tumor specific responding	4		tumor specific responding	6		normal specific responding	2		no responding	4					divergent responding	4
tumor specific responding	0		tumor specific responding	6		normal specific responding	2		no responding	4					divergent responding	4
tumor specific responding	6		tumor specific responding	6		normal specific responding	2		no responding	4					divergent responding	4
tumor specific responding	1		tumor specific responding	6		normal specific responding	2		no responding	4					divergent responding	4
tumor specific responding	2		tumor specific responding	6		normal specific responding	2		no responding	4					divergent responding	4
tumor specific responding	3		tumor specific responding	6		normal specific responding	2		no responding	4					divergent responding	4
tumor specific responding	2		tumor specific responding	6		normal specific responding	2		no responding	4					divergent responding	4
tumor specific responding	2		tumor specific responding	5		normal specific responding	2		no responding	4					divergent responding	4
tumor specific responding	0		tumor specific responding	5		normal specific responding	2		no responding	4					divergent responding	4
tumor specific responding	7		tumor specific responding	5		normal specific responding	2		no responding	4					divergent responding	4
tumor specific responding	10		tumor specific responding	5		normal specific responding	2		no responding	4					divergent responding	4
tumor specific responding	6		tumor specific responding	5		normal specific responding	2		no responding	4					divergent responding	4
tumor specific responding	2		tumor specific responding	5		normal specific responding	2		no responding	4					divergent responding	4
tumor specific responding	7		tumor specific responding	5		normal specific responding	2		no responding	4					divergent responding	4
tumor specific responding	0		tumor specific responding	5		normal specific responding	2		no responding	4					divergent responding	4
tumor specific responding	2		tumor specific responding	5		normal specific responding	2		no responding	4					divergent responding	3
tumor specific responding	0		tumor specific responding	5		normal specific responding	2		no responding	4					divergent responding	3
tumor specific responding	0		tumor specific responding	5		normal specific responding	2		no responding	4					divergent responding	3
tumor specific responding	2		tumor specific responding	5		normal specific responding	1		no responding	4					divergent responding	3
tumor specific responding	0		tumor specific responding	5		normal specific responding	1		no responding	4					divergent responding	3
tumor specific responding	3		tumor specific responding	5		normal specific responding	1		no responding	4					divergent responding	3
tumor specific responding	10		tumor specific responding	5		normal specific responding	1		no responding	4					divergent responding	3
tumor specific responding	3		tumor specific responding	5		normal specific responding	1		no responding	4					divergent responding	3
tumor specific responding	2		tumor specific responding	5		normal specific responding	1		no responding	3					divergent responding	3
tumor specific responding	0		tumor specific responding	5		normal specific responding	1		no responding	3					divergent responding	3
tumor specific responding	1		tumor specific responding	5		normal specific responding	1		no responding	3					divergent responding	3
tumor specific responding	4		tumor specific responding	5		normal specific responding	1		no responding	3					divergent responding	3
tumor specific responding	4		tumor specific responding	5		normal specific responding	1		no responding	3					divergent responding	3
tumor specific responding	5		tumor specific responding	5		normal specific responding	1		no responding	3					divergent responding	3
tumor specific responding	3		tumor specific responding	5		normal specific responding	1		no responding	3					divergent responding	3
tumor specific responding	5		tumor specific responding	5		normal specific responding	1		no responding	3					divergent responding	3
tumor specific responding	6		tumor specific responding	4		normal specific responding	1		no responding	3					divergent responding	3
tumor specific responding	0		tumor specific responding	4		normal specific responding	1		no responding	3					divergent responding	3
tumor specific responding	2		tumor specific responding	4		normal specific responding	1		no responding	3					divergent responding	3
tumor specific responding	0		tumor specific responding	4		normal specific responding	1		no responding	3					divergent responding	3
tumor specific responding	0		tumor specific responding	4		normal specific responding	1		no responding	3					divergent responding	3
tumor specific responding	3		tumor specific responding	4		normal specific responding	1		no responding	3					divergent responding	3
tumor specific responding	3		tumor specific responding	4		normal specific responding	1		no responding	3					divergent responding	2
tumor specific responding	0		tumor specific responding	4		normal specific responding	1		no responding	3					divergent responding	2
tumor specific responding	0		tumor specific responding	4		normal specific responding	1		no responding	3					divergent responding	2
tumor specific responding	7		tumor specific responding	4		normal specific responding	1		no responding	3					divergent responding	2
tumor specific responding	2		tumor specific responding	4		normal specific responding	1		no responding	3					divergent responding	2
tumor specific responding	2		tumor specific responding	4		normal specific responding	1		no responding	3					divergent responding	2
tumor specific responding	1		tumor specific responding	4		normal specific responding	1		no responding	3					divergent responding	2
tumor specific responding	7		tumor specific responding	4		normal specific responding	1		no responding	3					divergent responding	2
tumor specific responding	0		tumor specific responding	4		normal specific responding	1		no responding	3					divergent responding	2
tumor specific responding	2		tumor specific responding	4		normal specific responding	1		no responding	3					divergent responding	2
tumor specific responding	0		tumor specific responding	4		normal specific responding	1		no responding	3					divergent responding	2
tumor specific responding	3		tumor specific responding	4		normal specific responding	1		no responding	3					divergent responding	2
tumor specific responding	2		tumor specific responding	4		normal specific responding	1		no responding	3					divergent responding	2
tumor specific responding	3		tumor specific responding	4		normal specific responding	1		no responding	3					divergent responding	2
tumor specific responding	1		tumor specific responding	4		normal specific responding	1		no responding	3					divergent responding	2
tumor specific responding	0		tumor specific responding	4		normal specific responding	1		no responding	3					divergent responding	2
tumor specific responding	0		tumor specific responding	4		normal specific responding	1		no responding	3					divergent responding	2
tumor specific responding	0		tumor specific responding	4		normal specific responding	1		no responding	3					divergent responding	2
tumor specific responding	1		tumor specific responding	4		normal specific responding	1		no responding	3					divergent responding	2
tumor specific responding	0		tumor specific responding	4		normal specific responding	1		no responding	3					divergent responding	2
tumor specific responding	1		tumor specific responding	4		normal specific responding	1		no responding	3					divergent responding	2
tumor specific responding	1		tumor specific responding	4		normal specific responding	0		no responding	3					divergent responding	2
tumor specific responding	2		tumor specific responding	4		normal specific responding	0		no responding	3					divergent responding	2
tumor specific responding	5		tumor specific responding	4		normal specific responding	0		no responding	3					divergent responding	2
tumor specific responding	2		tumor specific responding	3		normal specific responding	0		no responding	3					divergent responding	2
tumor specific responding	0		tumor specific responding	3		normal specific responding	0		no responding	3					divergent responding	2
tumor specific responding	5		tumor specific responding	3		normal specific responding	0		no responding	3					divergent responding	2
tumor specific responding	0		tumor specific responding	3		normal specific responding	0		no responding	3					divergent responding	2
tumor specific responding	0		tumor specific responding	3		normal specific responding	0		no responding	3					divergent responding	2
tumor specific responding	2		tumor specific responding	3		normal specific responding	0		no responding	2					divergent responding	2
tumor specific responding	3		tumor specific responding	3		normal specific responding	0		no responding	2					divergent responding	2
tumor specific responding	2		tumor specific responding	3		normal specific responding	0		no responding	2					divergent responding	1
tumor specific responding	2		tumor specific responding	3		normal specific responding	0		no responding	2					divergent responding	1
tumor specific responding	5		tumor specific responding	3		normal specific responding	0		no responding	2					divergent responding	1
tumor specific responding	0		tumor specific responding	3		normal specific responding	0		no responding	2					divergent responding	1
tumor specific responding	2		tumor specific responding	3		normal specific responding	0		no responding	2					divergent responding	1
tumor specific responding	0		tumor specific responding	3		normal specific responding	0		no responding	2					divergent responding	1
tumor specific responding	1		tumor specific responding	3		normal specific responding	0		no responding	2					divergent responding	1
tumor specific responding	1		tumor specific responding	3		normal specific responding	0		no responding	2					divergent responding	1
tumor specific responding	0		tumor specific responding	3		normal specific responding	0		no responding	2					divergent responding	1
tumor specific responding	0		tumor specific responding	3		normal specific responding	0		no responding	2					divergent responding	1
tumor specific responding	2		tumor specific responding	3		normal specific responding	0		no responding	2					divergent responding	1
tumor specific responding	3		tumor specific responding	3		normal specific responding	0		no responding	2					divergent responding	1
tumor specific responding	0		tumor specific responding	3		normal specific responding	0		no responding	2					divergent responding	1
tumor specific responding	1		tumor specific responding	3		normal specific responding	0		no responding	2					divergent responding	1
tumor specific responding	0		tumor specific responding	3		normal specific responding	0		no responding	2					divergent responding	1
tumor specific responding	0		tumor specific responding	3		normal specific responding	0		no responding	2					divergent responding	1
tumor specific responding	0		tumor specific responding	3		normal specific responding	0		no responding	2					divergent responding	1
tumor specific responding	1		tumor specific responding	3		normal specific responding	0		no responding	2					divergent responding	1
tumor specific responding	0		tumor specific responding	3		normal specific responding	0		no responding	2					divergent responding	1
tumor specific responding	1		tumor specific responding	3		normal specific responding	0		no responding	2					divergent responding	1
tumor specific responding	0		tumor specific responding	3		normal specific responding	0		no responding	2					divergent responding	1
tumor specific responding	4		tumor specific responding	3		normal specific responding	0		no responding	2					divergent responding	1
tumor specific responding	1		tumor specific responding	3		normal specific responding	0		no responding	2					divergent responding	1
tumor specific responding	0		tumor specific responding	3		normal specific responding	0		no responding	2					divergent responding	1
tumor specific responding	2		tumor specific responding	3		normal specific responding	0		no responding	2					divergent responding	1
tumor specific responding	4		tumor specific responding	3		normal specific responding	0		no responding	2					divergent responding	1
tumor specific responding	0		tumor specific responding	3		normal specific responding	0		no responding	2					divergent responding	1
tumor specific responding	0		tumor specific responding	3		normal specific responding	0		no responding	2					divergent responding	0
tumor specific responding	2		tumor specific responding	3		normal specific responding	0		no responding	2					divergent responding	0
tumor specific responding	2		tumor specific responding	3		normal specific responding	0		no responding	2					divergent responding	0
tumor specific responding	1		tumor specific responding	3		normal specific responding	0		no responding	2					divergent responding	0
tumor specific responding	3		tumor specific responding	2					no responding	2					divergent responding	0
tumor specific responding	0		tumor specific responding	2					no responding	2					divergent responding	0
tumor specific responding	0		tumor specific responding	2					no responding	2					divergent responding	0
tumor specific responding	2		tumor specific responding	2					no responding	2					divergent responding	0
tumor specific responding	0		tumor specific responding	2					no responding	2					divergent responding	0
tumor specific responding	0		tumor specific responding	2					no responding	2					divergent responding	0
tumor specific responding	0		tumor specific responding	2					no responding	2					divergent responding	0
tumor specific responding	2		tumor specific responding	2					no responding	2					divergent responding	0
tumor specific responding	1		tumor specific responding	2					no responding	2					divergent responding	0
tumor specific responding	2		tumor specific responding	2					no responding	2					divergent responding	0
tumor specific responding	1		tumor specific responding	2					no responding	2					divergent responding	0
tumor specific responding	1		tumor specific responding	2					no responding	1					divergent responding	0
tumor specific responding	0		tumor specific responding	2					no responding	1					divergent responding	0
tumor specific responding	1		tumor specific responding	2					no responding	1					divergent responding	0
tumor specific responding	1		tumor specific responding	2					no responding	1					divergent responding	0
tumor specific responding	2		tumor specific responding	2					no responding	1					divergent responding	0
tumor specific responding	3		tumor specific responding	2					no responding	1					divergent responding	0
tumor specific responding	4		tumor specific responding	2					no responding	1					divergent responding	0
tumor specific responding	2		tumor specific responding	2					no responding	1					divergent responding	0
tumor specific responding	1		tumor specific responding	2					no responding	1					divergent responding	0
tumor specific responding	0		tumor specific responding	2					no responding	1					divergent responding	0
tumor specific responding	0		tumor specific responding	2					no responding	1					divergent responding	0
tumor specific responding	0		tumor specific responding	2					no responding	1					divergent responding	0
tumor specific responding	1		tumor specific responding	2					no responding	1					divergent responding	0
tumor specific responding	2		tumor specific responding	2					no responding	1					divergent responding	0
tumor specific responding	0		tumor specific responding	2					no responding	1					divergent responding	0
tumor specific responding	0		tumor specific responding	2					no responding	1
tumor specific responding	0		tumor specific responding	2					no responding	1
tumor specific responding	1		tumor specific responding	2					no responding	1
tumor specific responding	1		tumor specific responding	2					no responding	1
tumor specific responding	1		tumor specific responding	2					no responding	1
tumor specific responding	0		tumor specific responding	2					no responding	1
tumor specific responding	2		tumor specific responding	2					no responding	1
tumor specific responding	1		tumor specific responding	2					no responding	1
tumor specific responding	0		tumor specific responding	2					no responding	1
tumor specific responding	0		tumor specific responding	2					no responding	1
tumor specific responding	0		tumor specific responding	2					no responding	1
tumor specific responding	2		tumor specific responding	2					no responding	1
tumor specific responding	23		tumor specific responding	2					no responding	1
tumor specific responding	16		tumor specific responding	2					no responding	1
tumor specific responding	7		tumor specific responding	2					no responding	1
tumor specific responding	18		tumor specific responding	2					no responding	1
tumor specific responding	14		tumor specific responding	2					no responding	1
tumor specific responding	8		tumor specific responding	2					no responding	1
tumor specific responding	3		tumor specific responding	2					no responding	1
tumor specific responding	0		tumor specific responding	2					no responding	1
tumor specific responding	9		tumor specific responding	2					no responding	1
tumor specific responding	10		tumor specific responding	2					no responding	1
tumor specific responding	32		tumor specific responding	2					no responding	1
tumor specific responding	21		tumor specific responding	2					no responding	1
tumor specific responding	13		tumor specific responding	2					no responding	1
tumor specific responding	13		tumor specific responding	2					no responding	1
tumor specific responding	12		tumor specific responding	2					no responding	1
tumor specific responding	12		tumor specific responding	2					no responding	1
tumor specific responding	21		tumor specific responding	1					no responding	1
tumor specific responding	21		tumor specific responding	1					no responding	1
tumor specific responding	0		tumor specific responding	1					no responding	1
tumor specific responding	1		tumor specific responding	1					no responding	1
tumor specific responding	0		tumor specific responding	1					no responding	1
tumor specific responding	6		tumor specific responding	1					no responding	1
tumor specific responding	2		tumor specific responding	1					no responding	1
tumor specific responding	23		tumor specific responding	1					no responding	1
tumor specific responding	1		tumor specific responding	1					no responding	1
tumor specific responding	0		tumor specific responding	1					no responding	1
tumor specific responding	3		tumor specific responding	1					no responding	1
tumor specific responding	8		tumor specific responding	1					no responding	1
tumor specific responding	0		tumor specific responding	1					no responding	1
tumor specific responding	2		tumor specific responding	1					no responding	1
tumor specific responding	1		tumor specific responding	1					no responding	1
tumor specific responding	3		tumor specific responding	1					no responding	1
tumor specific responding	5		tumor specific responding	1					no responding	1
tumor specific responding	2		tumor specific responding	1					no responding	1
tumor specific responding	3		tumor specific responding	1					no responding	1
tumor specific responding	0		tumor specific responding	1					no responding	1
tumor specific responding	0		tumor specific responding	1					no responding	1
tumor specific responding	0		tumor specific responding	1					no responding	1
tumor specific responding	1		tumor specific responding	1					no responding	1
tumor specific responding	0		tumor specific responding	1					no responding	1
tumor specific responding	0		tumor specific responding	1					no responding	1
tumor specific responding	0		tumor specific responding	1					no responding	1
tumor specific responding	0		tumor specific responding	1					no responding	1
tumor specific responding	2		tumor specific responding	1					no responding	1
tumor specific responding	0		tumor specific responding	1					no responding	1
tumor specific responding	1		tumor specific responding	1					no responding	1
tumor specific responding	0		tumor specific responding	1					no responding	1
tumor specific responding	0		tumor specific responding	1					no responding	1
tumor specific responding	1		tumor specific responding	1					no responding	1
tumor specific responding	0		tumor specific responding	1					no responding	1
tumor specific responding	9		tumor specific responding	1					no responding	0
tumor specific responding	8		tumor specific responding	1					no responding	0
tumor specific responding	11		tumor specific responding	1					no responding	0
tumor specific responding	7		tumor specific responding	1					no responding	0
tumor specific responding	8		tumor specific responding	1					no responding	0
tumor specific responding	8		tumor specific responding	1					no responding	0
tumor specific responding	11		tumor specific responding	1					no responding	0
tumor specific responding	3		tumor specific responding	1					no responding	0
tumor specific responding	4		tumor specific responding	1					no responding	0
tumor specific responding	5		tumor specific responding	1					no responding	0
tumor specific responding	3		tumor specific responding	1					no responding	0
tumor specific responding	8		tumor specific responding	1					no responding	0
tumor specific responding	8		tumor specific responding	1					no responding	0
tumor specific responding	9		tumor specific responding	1					no responding	0
tumor specific responding	2		tumor specific responding	1					no responding	0
tumor specific responding	10		tumor specific responding	0					no responding	0
tumor specific responding	1		tumor specific responding	0					no responding	0
tumor specific responding	3		tumor specific responding	0					no responding	0
tumor specific responding	3		tumor specific responding	0					no responding	0
tumor specific responding	9		tumor specific responding	0					no responding	0
tumor specific responding	1		tumor specific responding	0					no responding	0
tumor specific responding	7		tumor specific responding	0					no responding	0
tumor specific responding	8		tumor specific responding	0					no responding	0
tumor specific responding	8		tumor specific responding	0					no responding	0
tumor specific responding	5		tumor specific responding	0					no responding	0
tumor specific responding	6		tumor specific responding	0					no responding	0
tumor specific responding	5		tumor specific responding	0					no responding	0
tumor specific responding	11		tumor specific responding	0					no responding	0
tumor specific responding	4		tumor specific responding	0					no responding	0
tumor specific responding	7		tumor specific responding	0					no responding	0
tumor specific responding	2		tumor specific responding	0					no responding	0
tumor specific responding	5		tumor specific responding	0					no responding	0
tumor specific responding	9		tumor specific responding	0					no responding	0
tumor specific responding	5		tumor specific responding	0					no responding	0
tumor specific responding	9		tumor specific responding	0					no responding	0
tumor specific responding	10		tumor specific responding	0					no responding	0
tumor specific responding	7		tumor specific responding	0					no responding	0
tumor specific responding	5		tumor specific responding	0					no responding	0
tumor specific responding	1		tumor specific responding	0					no responding	0
tumor specific responding	7		tumor specific responding	0					no responding	0
tumor specific responding	6		tumor specific responding	0					no responding	0
tumor specific responding	2		tumor specific responding	0					no responding	0
tumor specific responding	2		tumor specific responding	0					no responding	0
tumor specific responding	5		tumor specific responding	0					no responding	0
tumor specific responding	2		tumor specific responding	0					no responding	0
tumor specific responding	9		tumor specific responding	0					no responding	0
tumor specific responding	6		tumor specific responding	0					no responding	0
tumor specific responding	4		tumor specific responding	0					no responding	0
tumor specific responding	4		tumor specific responding	0					no responding	0
tumor specific responding	6		tumor specific responding	0					no responding	0
tumor specific responding	2		tumor specific responding	0					no responding	0
tumor specific responding	0		tumor specific responding	0					no responding	0
tumor specific responding	7		tumor specific responding	0					no responding	0
tumor specific responding	3		tumor specific responding	0					no responding	0
tumor specific responding	2		tumor specific responding	0					no responding	0
tumor specific responding	4		tumor specific responding	0					no responding	0
tumor specific responding	1		tumor specific responding	0					no responding	0
tumor specific responding	4		tumor specific responding	0					no responding	0
tumor specific responding	5		tumor specific responding	0					no responding	0
tumor specific responding	49		tumor specific responding	0					no responding	0
tumor specific responding	35		tumor specific responding	0					no responding	0
tumor specific responding	35		tumor specific responding	0					no responding	0
tumor specific responding	1		tumor specific responding	0					no responding	0
tumor specific responding	8		tumor specific responding	0					no responding	0
tumor specific responding	33		tumor specific responding	0					no responding	0
tumor specific responding	8		tumor specific responding	0					no responding	0
tumor specific responding	8		tumor specific responding	0					no responding	0
tumor specific responding	8		tumor specific responding	0					no responding	0
tumor specific responding	8		tumor specific responding	0					no responding	0
tumor specific responding	29		tumor specific responding	0					no responding	0
tumor specific responding	3		tumor specific responding	0					no responding	0
tumor specific responding	23		tumor specific responding	0					no responding	0
tumor specific responding	0		tumor specific responding	0					no responding	0
tumor specific responding	0		tumor specific responding	0					no responding	0
tumor specific responding	3		tumor specific responding	0					no responding	0
tumor specific responding	3		tumor specific responding	0					no responding	0
tumor specific responding	1		tumor specific responding	0					no responding	0
tumor specific responding	1		tumor specific responding	0					no responding	0
tumor specific responding	0		tumor specific responding	0					no responding	0
tumor specific responding	0		tumor specific responding	0					no responding	0
tumor specific responding	4		tumor specific responding	0					no responding	0
tumor specific responding	0		tumor specific responding	0					no responding	0
tumor specific responding	0		tumor specific responding	0					no responding	0
tumor specific responding	2		tumor specific responding	0					no responding	0
tumor specific responding	0		tumor specific responding	0					no responding	0
tumor specific responding	4		tumor specific responding	0					no responding	0
tumor specific responding	0		tumor specific responding	0					no responding	0
tumor specific responding	1		tumor specific responding	0					no responding	0
tumor specific responding	0		tumor specific responding	0					no responding	0
tumor specific responding	15		tumor specific responding	0					no responding	0
tumor specific responding	5		tumor specific responding	0					no responding	0
tumor specific responding	5		tumor specific responding	0					no responding	0
tumor specific responding	4		tumor specific responding	0					no responding	0
tumor specific responding	4		tumor specific responding	0					no responding	0
tumor specific responding	4		tumor specific responding	0					no responding	0
tumor specific responding	2		tumor specific responding	0					no responding	0
tumor specific responding	2		tumor specific responding	0					no responding	0
tumor specific responding	1		tumor specific responding	0					no responding	0
tumor specific responding	0		tumor specific responding	0					no responding	0
tumor specific responding	4								no responding	0
normal specific responding	46								no responding	0
normal specific responding	28								no responding	0
normal specific responding	9								no responding	0
normal specific responding	11								no responding	0
normal specific responding	9								no responding	0
normal specific responding	9								no responding	0
normal specific responding	12								no responding	0
normal specific responding	4								no responding	0
normal specific responding	22								no responding	0
normal specific responding	12								no responding	0
normal specific responding	4								no responding	0
normal specific responding	1								no responding	0
normal specific responding	8								no responding	0
normal specific responding	5								no responding	0
normal specific responding	15								no responding	0
normal specific responding	15								no responding	0
normal specific responding	8								no responding	0
normal specific responding	14								no responding	0
normal specific responding	9								no responding	0
normal specific responding	0								no responding	0
normal specific responding	0								no responding	0
normal specific responding	6								no responding	0
normal specific responding	5								no responding	0
normal specific responding	9								no responding	0
normal specific responding	6
normal specific responding	7
normal specific responding	1
normal specific responding	2
normal specific responding	11
normal specific responding	0
normal specific responding	1
normal specific responding	10
normal specific responding	3
normal specific responding	2
normal specific responding	1
normal specific responding	8
normal specific responding	1
normal specific responding	0
normal specific responding	8
normal specific responding	5
normal specific responding	3
normal specific responding	3
normal specific responding	2
normal specific responding	2
normal specific responding	7
normal specific responding	1
normal specific responding	0
normal specific responding	3
normal specific responding	10
normal specific responding	1
normal specific responding	6
normal specific responding	7
normal specific responding	2
normal specific responding	2
normal specific responding	0
normal specific responding	2
normal specific responding	1
normal specific responding	3
normal specific responding	5
normal specific responding	3
normal specific responding	9
normal specific responding	0
normal specific responding	2
normal specific responding	6
normal specific responding	1
normal specific responding	5
normal specific responding	6
normal specific responding	2
normal specific responding	3
normal specific responding	0
normal specific responding	5
normal specific responding	4
normal specific responding	3
normal specific responding	2
normal specific responding	7
normal specific responding	3
normal specific responding	1
normal specific responding	10
normal specific responding	0
normal specific responding	1
normal specific responding	1
normal specific responding	4
normal specific responding	1
normal specific responding	1
normal specific responding	0
normal specific responding	2
normal specific responding	5
normal specific responding	0
normal specific responding	0
normal specific responding	1
normal specific responding	6
normal specific responding	2
normal specific responding	3
normal specific responding	2
normal specific responding	5
normal specific responding	1
normal specific responding	0
normal specific responding	0
normal specific responding	0
normal specific responding	0
normal specific responding	2
normal specific responding	0
normal specific responding	6
normal specific responding	2
normal specific responding	0
normal specific responding	0
normal specific responding	1
normal specific responding	3
normal specific responding	0
normal specific responding	0
normal specific responding	2
normal specific responding	0
normal specific responding	6
normal specific responding	3
normal specific responding	2
normal specific responding	3
normal specific responding	3
normal specific responding	0
normal specific responding	2
normal specific responding	2
normal specific responding	0
normal specific responding	0
normal specific responding	1
normal specific responding	4
normal specific responding	4
normal specific responding	0
normal specific responding	8
normal specific responding	1
normal specific responding	2
normal specific responding	4
normal specific responding	0
normal specific responding	1
normal specific responding	3
normal specific responding	4
normal specific responding	1
normal specific responding	0
normal specific responding	1
normal specific responding	1
normal specific responding	0
normal specific responding	1
normal specific responding	2
normal specific responding	1
normal specific responding	0
normal specific responding	0
normal specific responding	4
normal specific responding	0
normal specific responding	1
normal specific responding	2
normal specific responding	1
normal specific responding	1
normal specific responding	1
normal specific responding	2
normal specific responding	1
normal specific responding	1
normal specific responding	0
normal specific responding	1
normal specific responding	0
normal specific responding	1
normal specific responding	0
normal specific responding	0
normal specific responding	3
normal specific responding	1
normal specific responding	2
normal specific responding	3
normal specific responding	3
normal specific responding	12
normal specific responding	9
normal specific responding	4
normal specific responding	4
normal specific responding	8
normal specific responding	3
normal specific responding	10
normal specific responding	7
normal specific responding	4
normal specific responding	22
normal specific responding	2
normal specific responding	5
normal specific responding	2
normal specific responding	0
normal specific responding	1
normal specific responding	5
normal specific responding	1
normal specific responding	1
normal specific responding	2
normal specific responding	1
normal specific responding	0
normal specific responding	0
normal specific responding	3
normal specific responding	6
normal specific responding	9
normal specific responding	7
normal specific responding	1
normal specific responding	0
normal specific responding	4
normal specific responding	39
normal specific responding	5
normal specific responding	23
normal specific responding	28
normal specific responding	22
normal specific responding	24
normal specific responding	7
normal specific responding	12
normal specific responding	12
normal specific responding	3
normal specific responding	2
normal specific responding	1
normal specific responding	76
normal specific responding	28
normal specific responding	25
normal specific responding	2
normal specific responding	4
normal specific responding	19
normal specific responding	0
normal specific responding	18
no responding	38
no responding	39
no responding	24
no responding	13
no responding	23
no responding	33
no responding	33
no responding	30
no responding	10
no responding	3
no responding	3
no responding	13
no responding	24
no responding	1
no responding	16
no responding	20
no responding	17
no responding	9
no responding	3
no responding	0
no responding	15
no responding	15
no responding	17
no responding	4
no responding	15
no responding	1
no responding	1
no responding	14
no responding	12
no responding	12
no responding	14
no responding	10
no responding	18
no responding	1
no responding	9
no responding	11
no responding	5
no responding	1
no responding	15
no responding	7
no responding	11
no responding	4
no responding	2
no responding	5
no responding	3
no responding	1
no responding	7
no responding	3
no responding	10
no responding	2
no responding	1
no responding	10
no responding	5
no responding	2
no responding	9
no responding	6
no responding	0
no responding	1
no responding	10
no responding	4
no responding	1
no responding	10
no responding	9
no responding	6
no responding	8
no responding	3
no responding	0
no responding	4
no responding	0
no responding	8
no responding	1
no responding	2
no responding	4
no responding	6
no responding	0
no responding	2
no responding	4
no responding	1
no responding	3
no responding	7
no responding	2
no responding	9
no responding	5
no responding	0
no responding	7
no responding	5
no responding	1
no responding	5
no responding	5
no responding	9
no responding	3
no responding	0
no responding	7
no responding	7
no responding	4
no responding	2
no responding	0
no responding	6
no responding	0
no responding	5
no responding	1
no responding	5
no responding	2
no responding	7
no responding	3
no responding	9
no responding	6
no responding	1
no responding	7
no responding	7
no responding	0
no responding	9
no responding	0
no responding	9
no responding	3
no responding	0
no responding	5
no responding	3
no responding	2
no responding	1
no responding	0
no responding	0
no responding	2
no responding	4
no responding	6
no responding	0
no responding	1
no responding	0
no responding	0
no responding	1
no responding	9
no responding	7
no responding	0
no responding	1
no responding	0
no responding	3
no responding	1
no responding	11
no responding	5
no responding	0
no responding	1
no responding	3
no responding	0
no responding	0
no responding	0
no responding	1
no responding	3
no responding	1
no responding	4
no responding	1
no responding	1
no responding	7
no responding	0
no responding	1
no responding	6
no responding	5
no responding	0
no responding	0
no responding	0
no responding	5
no responding	4
no responding	0
no responding	0
no responding	1
no responding	2
no responding	2
no responding	2
no responding	0
no responding	0
no responding	3
no responding	0
no responding	0
no responding	1
no responding	0
no responding	6
no responding	1
no responding	2
no responding	3
no responding	0
no responding	0
no responding	1
no responding	0
no responding	0
no responding	0
no responding	1
no responding	2
no responding	5
no responding	2
no responding	0
no responding	1
no responding	0
no responding	3
no responding	0
no responding	3
no responding	1
no responding	0
no responding	4
no responding	4
no responding	5
no responding	4
no responding	3
no responding	2
no responding	3
no responding	6
no responding	3
no responding	1
no responding	1
no responding	1
no responding	2
no responding	4
no responding	0
no responding	3
no responding	0
no responding	1
no responding	1
no responding	4
no responding	2
no responding	2
no responding	4
no responding	0
no responding	1
no responding	4
no responding	4
no responding	3
no responding	0
no responding	3
no responding	3
no responding	3
no responding	1
no responding	0
no responding	0
no responding	0
no responding	2
no responding	1
no responding	0
no responding	2
no responding	2
no responding	1
no responding	3
no responding	1
no responding	2
no responding	0
no responding	3
no responding	0
no responding	4
no responding	0
no responding	6
no responding	0
no responding	5
no responding	0
no responding	4
no responding	0
no responding	0
no responding	1
no responding	3
no responding	3
no responding	1
no responding	0
no responding	1
no responding	0
no responding	0
no responding	0
no responding	0
no responding	0
no responding	5
no responding	1
no responding	2
no responding	1
no responding	0
no responding	2
no responding	5
no responding	2
no responding	2
no responding	1
no responding	0
no responding	0
no responding	3
no responding	0
no responding	0
no responding	2
no responding	1
no responding	0
no responding	0
no responding	0
no responding	1
no responding	0
no responding	0
no responding	0
no responding	0
no responding	2
no responding	1
no responding	1
no responding	1
no responding	0
no responding	0
no responding	0
no responding	2
no responding	3
no responding	0
no responding	1
no responding	2
no responding	1
no responding	3
no responding	0
no responding	1
no responding	1
no responding	0
no responding	1
no responding	1
no responding	1
no responding	1
no responding	0
no responding	0
no responding	0
no responding	0
no responding	1
no responding	0
no responding	1
no responding	1
no responding	1
no responding	3
no responding	0
no responding	0
no responding	1
no responding	0
no responding	1
no responding	3
no responding	0
no responding	2
no responding	0
no responding	0
no responding	0
no responding	1
no responding	1
no responding	1
no responding	0
no responding	0
no responding	0
no responding	2
no responding	0
no responding	0
no responding	0
no responding	3
no responding	0
no responding	0
no responding	0
no responding	0
no responding	11
no responding	5
no responding	16
no responding	2
no responding	3
no responding	26
no responding	27
no responding	2
no responding	11
no responding	20
no responding	0
no responding	0
no responding	4
no responding	2
no responding	7
no responding	4
no responding	1
no responding	3
no responding	0
no responding	0
no responding	1
no responding	0
no responding	6
no responding	21
no responding	0
no responding	0
no responding	0
no responding	0
no responding	0
no responding	0
no responding	0
no responding	0
no responding	0
no responding	0
no responding	0
no responding	0
no responding	13
no responding	3
no responding	12
no responding	2
no responding	4
no responding	3
no responding	8
no responding	9
no responding	6
no responding	6
no responding	0
no responding	2
no responding	9
no responding	0
no responding	0
no responding	9
no responding	4
no responding	5
no responding	3
no responding	8
no responding	3
no responding	4
no responding	4
no responding	4
no responding	4
no responding	1
no responding	2
no responding	5
no responding	3
no responding	1
no responding	8
no responding	5
no responding	1
no responding	2
no responding	1
no responding	8
no responding	9
no responding	2
no responding	8
no responding	1
no responding	2
no responding	4
no responding	2
divergent responding	10
divergent responding	37
divergent responding	17
divergent responding	4
divergent responding	55
divergent responding	52
divergent responding	52
divergent responding	38
divergent responding	38
divergent responding	16
divergent responding	3
divergent responding	28
divergent responding	15
divergent responding	21
divergent responding	35
divergent responding	6
divergent responding	44
divergent responding	14
divergent responding	12
divergent responding	30
divergent responding	24
divergent responding	15
divergent responding	34
divergent responding	7
divergent responding	31
divergent responding	26
divergent responding	1
divergent responding	4
divergent responding	15
divergent responding	7
divergent responding	16
divergent responding	9
divergent responding	9
divergent responding	8
divergent responding	25
divergent responding	9
divergent responding	14
divergent responding	8
divergent responding	8
divergent responding	31
divergent responding	22
divergent responding	20
divergent responding	2
divergent responding	4
divergent responding	14
divergent responding	3
divergent responding	9
divergent responding	19
divergent responding	19
divergent responding	11
divergent responding	8
divergent responding	4
divergent responding	8
divergent responding	3
divergent responding	8
divergent responding	9
divergent responding	10
divergent responding	4
divergent responding	14
divergent responding	10
divergent responding	8
divergent responding	8
divergent responding	0
divergent responding	5
divergent responding	6
divergent responding	12
divergent responding	5
divergent responding	9
divergent responding	2
divergent responding	5
divergent responding	9
divergent responding	3
divergent responding	11
divergent responding	2
divergent responding	5
divergent responding	6
divergent responding	3
divergent responding	6
divergent responding	13
divergent responding	5
divergent responding	4
divergent responding	5
divergent responding	5
divergent responding	2
divergent responding	5
divergent responding	2
divergent responding	2
divergent responding	2
divergent responding	7
divergent responding	3
divergent responding	4
divergent responding	5
divergent responding	5
divergent responding	2
divergent responding	4
divergent responding	7
divergent responding	3
divergent responding	0
divergent responding	3
divergent responding	2
divergent responding	12
divergent responding	3
divergent responding	6
divergent responding	10
divergent responding	3
divergent responding	7
divergent responding	2
divergent responding	0
divergent responding	8
divergent responding	2
divergent responding	3
divergent responding	1
divergent responding	8
divergent responding	0
divergent responding	0
divergent responding	0
divergent responding	0
divergent responding	2
divergent responding	2
divergent responding	6
divergent responding	4
divergent responding	4
divergent responding	3
divergent responding	1
divergent responding	0
divergent responding	2
divergent responding	0
divergent responding	3
divergent responding	4
divergent responding	1
divergent responding	4
divergent responding	6
divergent responding	2
divergent responding	1
divergent responding	3
divergent responding	2
divergent responding	1
divergent responding	1
divergent responding	5
divergent responding	4
divergent responding	1
divergent responding	1
divergent responding	0
divergent responding	2
divergent responding	3
divergent responding	2
divergent responding	0
divergent responding	1
divergent responding	2
divergent responding	2
divergent responding	2
divergent responding	0
divergent responding	2
divergent responding	0
divergent responding	2
divergent responding	4
divergent responding	7
divergent responding	0
divergent responding	1
divergent responding	2
divergent responding	0
divergent responding	0
divergent responding	2
divergent responding	1
divergent responding	3
divergent responding	0
divergent responding	1
divergent responding	1
divergent responding	0
divergent responding	1
divergent responding	0
divergent responding	18
divergent responding	20
divergent responding	27
divergent responding	15
divergent responding	11
divergent responding	21
divergent responding	19
divergent responding	21
divergent responding	17
divergent responding	12
divergent responding	3
divergent responding	11
divergent responding	2
divergent responding	3
divergent responding	2
divergent responding	3
divergent responding	3
divergent responding	7
divergent responding	15
divergent responding	23
divergent responding	0
divergent responding	1
divergent responding	0
divergent responding	22
divergent responding	7
divergent responding	1
divergent responding	2
divergent responding	0
divergent responding	0
divergent responding	1
divergent responding	5
divergent responding	0
divergent responding	1
divergent responding	2
divergent responding	2
divergent responding	1
divergent responding	1
divergent responding	1
divergent responding	0
divergent responding	1
divergent responding	0
divergent responding	0
divergent responding	6
divergent responding	0
divergent responding	0
divergent responding	1
divergent responding	6
divergent responding	9
divergent responding	6
divergent responding	4
divergent responding	5
divergent responding	10
divergent responding	0
divergent responding	6
divergent responding	11
divergent responding	3
divergent responding	1
divergent responding	7
divergent responding	3
divergent responding	5
divergent responding	2
divergent responding	8
divergent responding	4
divergent responding	7
divergent responding	10
divergent responding	5
divergent responding	1
divergent responding	5
divergent responding	1
consistent responding	2
consistent responding	10
consistent responding	4
consistent responding	5
consistent responding	2
consistent responding	4
consistent responding	4
consistent responding	2
consistent responding	7
consistent responding	0
consistent responding	0
consistent responding	2
consistent responding	2
consistent responding	0
consistent responding	0
consistent responding	0
consistent responding	3
consistent responding	1
consistent responding	0
consistent responding	2
consistent responding	3
consistent responding	5
consistent responding	2
consistent responding	0
consistent responding	3
consistent responding	1
