# Supplementary material for: Systematic Analysis of Time-Series Gene Expression Data on Tumor Cell-Selective Apoptotic Responses to HDAC Inhibitors
Source: Comput Math Methods Med. 2014 Oct 13;2014:867289. doi: 10.1155/2014/867289 (PMC4211306; doi:10.1155/2014/867289)
Supplement: Supplementary file 1 — Table S1. H-score of all pathways for tumor and normal samples: This table lists the name, category, website and H-score values for all 1307 pathway. Table S2. Illustrative pathways belonging to term "No responding": This table lists the name, category, website and TVPC patterns for "No responding" pathways. Table S3. Illustrative pathways belonging to term "Consistent responding": This table lists the name, category, website and TVPC patterns for "Consistent responding" pathways. Table S4. Illustrative pathways belonging to term "Tumor specific responding": This table lists the name, category, website and TVPC patterns for "Tumor specific responding" pathways. Table S5. Illustrative pathways belonging to term "Normal specific responding": This table lists the name, category, web site and TVPC patterns for "Normal specific responding" pathways. Table S6. Illustrative pathways belonging to term "Divergent responding": This table lists the name, category, website and TVPC patterns for "Divergent responding" pathways. Table S7. Genes within profile #0 for normal samples: This table contains all genes within profile #0 for normal samples, and lists the normalized expression data to the right of gene symbol. Table S8. Genes within profile #2 for normal samples: This table contains all genes within profile #2 for normal samples, and lists the normalized expression data to the right of gene symbol. Table S9. Genes within profile #9 for normal samples: This table contains all genes within profile #9 for normal samples, and lists the normalized expression data to the right of gene symbol. Table S10. Genes within profile #12 for normal samples: This table contains all genes within profile # 12 for normal samples, and lists the normalized expression data to the right of gene symbol. Table S11. Genes within profile #14 for normal samples: This table contains all genes within profile #14 for normal samples, and lists the normalized expression data to the right of gene symbol. Ta [file 867289.f1.zip › 867289.f1/Table S7.xls]

## Sheet: Sheet1
Gene Table for Profile 0 (0.0,-2.0,-3.0,-2.0) Normal
Num. Genes Expected	Num. Genes Assigned	P-Value	Significant
635	303.8	1.8e-66	(significant)
-------
Selected	Weight	Gene Symbol	SPOT	0h	4h	12h	24h
	1	ATN1	ID_51	0	-1.51	-1.61	-1.68
	1	PARP9	ID_71	0	-1.42	-2.85	-2.26
	1	PARP8	ID_72	0	-0.58	-1.46	-0.9
	1	SNORA28	ID_88	0	-1	-1.01	-0.99
	1	TMEM29 /// LOC653094	ID_106	0	-1.47	-1.41	-1.3
	1	FALZ	ID_123	0	-1.27	-1.01	-0.71
	1	FADD	ID_177	0	-1.87	-2.1	-2.04
	1	TFE3	ID_197	0	-1.25	-1.81	-1.17
	1	ATF1	ID_205	0	-1.37	-1.24	-1.18
	1	ATF7	ID_243	0	-0.86	-1.96	-0.79
	1	GBL	ID_282	0	-0.95	-1.59	-1.3
	1	FST	ID_319	0	-1.64	-2.57	-2.12
	1	MGC14376	ID_328	0	-1.55	-2.06	-1.8
	1	PPAN	ID_356	0	-1.47	-1.31	-1.54
	1	VRK2	ID_358	0	-0.8	-1.08	-1
	1	AFG3L1	ID_378	0	-1.82	-1.7	-2
	1	FXN	ID_399	0	-0.93	-1.41	-1.38
	1	APOBEC3G	ID_442	0	-1.05	-1.43	-1.3
	1	DCAMKL2	ID_456	0	-1.32	-2.28	-2.2
	1	FLJ39531	ID_507	0	-2.01	-2.01	-2.01
	1	PLEKHA2	ID_510	0	-1.53	-2.73	-2.46
	1	WHDC1L1 /// WHDC1L2	ID_523	0	-2.18	-2.47	-2.88
	1	PPAP2B	ID_554	0	-1.36	-1.86	-1.83
	1	IGF2BP3 /// LOC65110	ID_624	0	-0.77	-1.4	-1.03
	1	FLJ39349	ID_633	0	-1.21	-1.27	-1.23
	1	ADCK1	ID_656	0	-0.82	-1.03	-1.09
	1	GMEB2	ID_674	0	-1.93	-1.72	-1.71
	1	GMEB1	ID_676	0	-1.46	-1.27	-1.29
	1	RPL10 /// LOC284393	ID_734	0	-2.27	-2.38	-1.69
	1	JUNB	ID_744	0	-0.61	-1.09	-0.34
	1	LOC440498	ID_859	0	-0.68	-1.03	-0.94
	1	NR2F1	ID_937	0	-1.43	-2.02	-1.67
	1	C14ORF28	ID_958	0	-1.26	-1.16	-1.3
	1	SLC4A5	ID_1000	0	-0.91	-1.1	-1.15
	1	PTPN9	ID_1045	0	-3.14	-3.64	-3.89
	1	ECHDC2	ID_1060	0	-0.61	-1.11	-1.04
	1	PATZ1	ID_1155	0	-1.32	-1.46	-1
	1	MCPH1	ID_1219	0	-2.29	-2.16	-1.9
	1	LOC391356	ID_1253	0	-0.74	-1.33	-1.17
	1	LOC285193	ID_1273	0	-1.07	-1	-1.13
	1	PR47	ID_1277	0	-1.83	-2.02	-1.99
	1	RBM15B	ID_1314	0	-0.95	-1.01	-0.79
	1	DNMBP	ID_1392	0	-1.37	-2.22	-1.99
	1	PRKY	ID_1467	0	-0.85	-1.46	-1.22
	1	GTPBP2	ID_1472	0	-1.66	-1.3	-1.13
	1	LOC644246 /// LOC649	ID_1522	0	-0.9	-1.13	-1.06
	1	MBD3	ID_1559	0	-0.67	-1.21	-1.02
	1	SLC22A15	ID_1622	0	-2.12	-2.27	-2.37
	1	PRR8	ID_1670	0	-0.87	-0.96	-1.06
	1	ZADH2	ID_1731	0	-1.64	-2.51	-0.83
	1	COMMD5	ID_1738	0	-0.77	-1.2	-1.16
	1	SLC2A4RG	ID_1795	0	-0.95	-1.32	-1.34
	1	CENTG1	ID_1829	0	-2.11	-2.84	-3.05
	1	DIDO1	ID_1850	0	-0.96	-1.34	-1.15
	1	PLEKHG2	ID_1917	0	-1.32	-1.42	-1.3
	1	IMPACT	ID_1944	0	-1.03	-1.16	-0.63
	1	ST3GAL3	ID_1951	0	-0.98	-1.37	-0.92
	1	SMARCD1	ID_1961	0	-0.78	-1.03	-1.01
	1	IRX3	ID_2050	0	-0.91	-1.13	-1.19
	1	PLEKHO1	ID_2060	0	-0.48	-1.12	-0.96
	1	SMYD5	ID_2160	0	-1.27	-1.56	-1.74
	1	SCHIP1	ID_2166	0	-1.25	-1.8	-1.21
	1	PSG4	ID_2201	0	-1.21	-1.41	-0.97
	1	RBM39	ID_2203	0	-1.29	-1.3	-1.14
	1	RBM23	ID_2235	0	-1.31	-1.36	-1.2
	1	TBX2	ID_2238	0	-1.15	-1.78	-1.41
	1	TBX5	ID_2240	0	-1.35	-1.26	-0.81
	1	RBM15	ID_2256	0	-0.95	-1.04	-1.02
	1	C20ORF77	ID_2306	0	-0.73	-1.14	-1.14
	1	ABHD14A	ID_2339	0	-0.61	-1.23	-1.04
	1	KIAA1856	ID_2356	0	-1.82	-2.73	-2.08
	1	SETMAR	ID_2377	0	-1.42	-1.46	-1.78
	1	PSMD7	ID_2390	0	-1.01	-1.16	-1.03
	1	BUD13	ID_2443	0	-1.05	-1.14	-1.18
	1	DUS3L	ID_2447	0	-0.97	-2.24	-1.98
	1	VPS54	ID_2483	0	-1.34	-1.4	-1.09
	1	FOXF1	ID_2497	0	-2.12	-3.35	-3.1
	1	MARK1	ID_2515	0	-0.96	-1.06	-1.19
	1	GAS1	ID_2538	0	-1.54	-1.58	-1.27
	1	GAS5	ID_2543	0	-0.81	-1.16	-0.86
	1	USP16	ID_2569	0	-0.54	-1.16	-0.98
	1	USP21	ID_2595	0	-1.32	-1	-1.05
	1	USP24	ID_2606	0	-0.75	-1.12	-0.83
	1	MID2	ID_2633	0	-0.85	-1.73	-1.41
	1	TACC2	ID_2673	0	-0.99	-1.3	-0.65
	1	FBXW5	ID_2699	0	-0.9	-1.06	-0.9
	1	AUTS2	ID_2703	0	-0.95	-2.24	-1.86
	1	LOC400657	ID_2763	0	-2.23	-1.94	-1.31
	1	VPS36	ID_2781	0	-1.71	-2.49	-2.11
	1	DDX17	ID_2824	0	-0.52	-1.37	-1.08
	1	FBXL3	ID_2875	0	-1.33	-1.38	-1.49
	1	FBXO6	ID_2891	0	-1.89	-2.64	-2.68
	1	FBXO4	ID_2893	0	-1.12	-1.76	-1.56
	1	SEMA4C	ID_2983	0	-1.15	-1.35	-1.38
	1	DTX3L	ID_3050	0	-1.83	-2.92	-2.57
	1	STAMBPL1	ID_3076	0	-1.46	-1.16	-1.32
	1	TRPS1	ID_3222	0	-1.16	-1.75	-1.2
	1	LOC400713	ID_3337	0	-1.07	-1.09	-0.55
	1	C2ORF12 /// LOC64829	ID_3363	0	-0.55	-1.11	-0.41
	1	FRMD6	ID_3385	0	-0.88	-1.92	-1.52
	1	CLCF1	ID_3388	0	-2.22	-2.73	-2.59
	1	ADPRHL2	ID_3433	0	-1	-1.11	-1.19
	1	TDRD3	ID_3508	0	-2.09	-2.32	-2.33
	1	CCNT2	ID_3565	0	-1.08	-1.27	-1
	1	CAB39L	ID_3595	0	-0.68	-1.6	-0.68
	1	HOXA7	ID_3712	0	-1.5	-1.1	-0.99
	1	RNF12	ID_3713	0	-1.26	-1.31	-0.79
	1	HOXB2	ID_3740	0	-4	-4.13	-4.16
	1	GLTSCR2	ID_3809	0	-0.58	-1.04	-0.81
	1	LOC554203	ID_3826	0	-0.66	-1.73	-1.09
	1	PLAC7	ID_3837	0	-1.49	-1.95	-2.02
	1	SH3BP5L	ID_3889	0	-0.77	-1.48	-1.32
	1	MANBAL	ID_3948	0	-0.63	-1.16	-0.93
	1	LOC126208	ID_3960	0	-1.23	-1.33	-1.12
	1	TCEAL1	ID_3971	0	-0.49	-1.11	-0.77
	1	MGC24103	ID_3983	0	-2.48	-3.24	-2.52
	1	PMM2	ID_4059	0	-1.15	-2.05	-1.54
	1	GTF3C2	ID_4099	0	-0.87	-1.11	-0.89
	1	RPP38	ID_4111	0	-1.35	-1.28	-0.83
	1	MLLT10	ID_4154	0	-1.23	-1.16	-0.91
	1	STK11IP	ID_4165	0	-1.02	-1.06	-1.16
	1	SNUPN	ID_4223	0	-1.53	-1.08	-0.87
	1	LIMS3 /// LOC440895	ID_4232	0	-0.98	-1.35	-1.35
	1	LOC440309	ID_4248	0	-1.09	-1.38	-1.3
	1	ASB1	ID_4299	0	-1.4	-1.34	-0.82
	1	LOC402617	ID_4372	0	-0.68	-1.03	-0.8
	1	SMARCAD1	ID_4378	0	-1.12	-1.01	-0.85
	1	NME6	ID_4446	0	-3.84	-3.43	-3.41
	1	SHOX2	ID_4484	0	-1.39	-1.99	-2.05
	1	SERTAD3	ID_4518	0	-0.85	-1.16	-1.1
	1	SERTAD4	ID_4519	0	-1.09	-1.68	-1.22
	1	SERTAD1	ID_4524	0	-1.53	-2.48	-2.12
	1	PRKCBP1	ID_4541	0	-2.79	-2.7	-1.77
	1	KIAA0776	ID_4556	0	-0.97	-1.1	-1.02
	1	DDX28	ID_4605	0	-0.86	-1.32	-0.39
	1	DPH1 /// OVCA2	ID_4624	0	-0.88	-1.41	-0.94
	1	DDX3Y	ID_4661	0	-0.69	-1.03	-1.04
	1	ZNRD1	ID_4826	0	-0.89	-0.9	-1.03
	1	POGK	ID_4875	0	-1.26	-1.23	-1.13
	1	GRPEL2	ID_4909	0	-1.17	-1.42	-1.53
	1	TSSC4	ID_4914	0	-1.55	-1.9	-1.74
	1	TSSC1	ID_4917	0	-0.87	-1.37	-0.63
	1	SRRM2	ID_4922	0	-0.72	-1.08	-0.46
	1	ATE1	ID_4971	0	-1.03	-1.2	-1.1
	1	EDA2R	ID_5041	0	-0.89	-1.08	-1.06
	1	ARPM1	ID_5043	0	-2.69	-2.72	-2.68
	1	ZNF777	ID_5064	0	-1.02	-0.87	-0.83
	1	ZNF785	ID_5080	0	-1.72	-1.84	-1.78
	1	ZNF764	ID_5182	0	-1.04	-1.06	-0.98
	1	SETD1B	ID_5251	0	-1.47	-1.99	-1.82
	1	CDKN1B	ID_5295	0	-1.09	-1.39	-1.02
	1	FBXO30	ID_5297	0	-0.88	-1.23	-1.17
	1	UBXD6	ID_5307	0	-0.69	-1.89	-1.44
	1	STXBP3	ID_5342	0	-1.12	-1.06	-1.14
	1	STXBP5	ID_5350	0	-0.86	-1.12	-0.76
	1	FIGN	ID_5372	0	-0.47	-1.08	-0.51
	1	UBE2Q1	ID_5393	0	-0.57	-1.07	-0.72
	1	ZMAT3	ID_5473	0	-0.42	-1.09	-0.84
	1	SENP6	ID_5488	0	-1.62	-2.61	-2.13
	1	SDCCAG3	ID_5534	0	-0.93	-0.78	-1.03
	1	LOC150837	ID_5552	0	-3.29	-4.24	-4
	1	PCTK2	ID_5554	0	-1.06	-1.12	-1.25
	1	GOLPH3	ID_5565	0	-0.84	-1.09	-0.98
	1	C8ORF58	ID_5631	0	-1.27	-1.28	-1.27
	1	PGGT1B	ID_5654	0	-0.85	-1.29	-1.28
	1	CARD8	ID_5659	0	-1.54	-1.99	-1.67
	1	CARD6	ID_5674	0	-2.25	-2.21	-2.28
	1	UBE2E3	ID_5683	0	-0.65	-1.72	-1.05
	1	ARHGAP21	ID_5707	0	-0.79	-1.99	-1.53
	1	FAM60A	ID_5767	0	-0.85	-1.11	-0.92
	1	HLA-DPA1	ID_5825	0	-0.71	-1.05	-0.82
	1	PPCDC	ID_5837	0	-0.88	-0.95	-1.07
	1	NOD9	ID_5879	0	-1.38	-1.6	-1.76
	1	LOC221143	ID_5903	0	-0.71	-1.21	-0.81
	1	NHEJ1	ID_5924	0	-1.3	-1.13	-1.08
	1	DOT1L	ID_5976	0	-0.9	-0.84	-1.04
	1	PB1	ID_6041	0	-0.72	-1.05	-0.85
	1	CAMTA2	ID_6042	0	-0.95	-1.26	-0.8
	1	SUV39H1	ID_6076	0	-1.46	-1.43	-1.55
	1	METTL4	ID_6107	0	-1.53	-2.17	-1.54
	1	FLJ38717	ID_6150	0	-1.1	-1.11	-0.94
	1	FAM53A	ID_6199	0	-0.7	-1.04	-0.72
	1	C6ORF136	ID_6204	0	-1.03	-0.96	-0.76
	1	KIAA0141	ID_6224	0	-0.76	-1.28	-1.03
	1	C6ORF148	ID_6233	0	-0.71	-1.42	-0.96
	1	C6ORF145	ID_6237	0	-0.98	-2.39	-1.67
	1	INPPL1	ID_6311	0	-0.77	-2.04	-1.4
	1	LOC646739	ID_6347	0	-1.05	-1.58	-1.58
	1	SPRY4 /// LOC653170	ID_6349	0	-2.23	-5.36	-4.6
	1	PSCD2	ID_6360	0	-1.93	-1.95	-2.25
	1	BCAR3	ID_6387	0	-2.22	-2.7	-2.2
	1	TUSC1	ID_6390	0	-2.54	-3.65	-3.63
	1	FLJ41747	ID_6414	0	-1.58	-3.88	-3.17
	1	TSHZ3	ID_6427	0	-0.88	-1.47	-1.29
	1	TSHZ1	ID_6433	0	-0.87	-1.74	-0.58
	1	GMIP	ID_6439	0	-0.96	-1.33	-1.17
	1	RAD51L3	ID_6447	0	-1.17	-1.99	-1.89
	1	NOL3	ID_6486	0	-1.08	-1.21	-1.09
	1	C3ORF63	ID_6534	0	-1.02	-1.13	-0.92
	1	PTS	ID_6555	0	-0.64	-1.06	-1.05
	1	CENPO	ID_6559	0	-1.91	-2.11	-2.23
	1	CENPL	ID_6567	0	-0.59	-1.16	-0.94
	1	C3ORF59	ID_6587	0	-0.87	-1.66	-1.43
	1	SSTR1	ID_6646	0	-2.46	-3.33	-1.84
	1	C21ORF100	ID_6656	0	-1.24	-1.14	-1.22
	1	ZNF532	ID_6730	0	-1.39	-3.53	-2.76
	1	DAXX	ID_6735	0	-0.93	-1.19	-1.18
	1	GABPA	ID_6861	0	-1.51	-1.11	-0.89
	1	C17ORF27	ID_6862	0	-0.51	-1.2	-0.82
	1	MEIS2	ID_6888	0	-1.83	-2.77	-1.92
	1	IBRDC1	ID_6941	0	-1	-1.84	-0.54
	1	NFATC4	ID_6993	0	-1.22	-1.24	-1.03
	1	NSUN4	ID_7001	0	-2.3	-1.91	-1.27
	1	HCG11	ID_7061	0	-1.84	-1.65	-1.23
	1	PRDM1	ID_7090	0	-2.76	-4.23	-3.62
	1	FCHO2	ID_7108	0	-0.78	-1.27	-0.92
	1	C1ORF123	ID_7116	0	-0.62	-1	-0.86
	1	GOSR1	ID_7130	0	-1.05	-1.26	-1.16
	1	C1ORF156	ID_7134	0	-3.06	-3	-2.64
	1	AMIGO2	ID_7185	0	-1.08	-2.99	-1.98
	1	C1ORF164	ID_7213	0	-0.65	-1.08	-0.98
	1	MYST2	ID_7250	0	-1.88	-1.54	-1.8
	1	MYST4	ID_7252	0	-1.99	-1.57	-1.18
	1	MRPS18B	ID_7270	0	-1.43	-1.53	-1.3
	1	AKAP8	ID_7277	0	-1.9	-2.01	-1.77
	1	KIAA0460	ID_7299	0	-1.78	-1.98	-1.89
	1	HCFC1	ID_7348	0	-0.87	-2.21	-1.47
	1	ZNF605	ID_7385	0	-1.29	-0.87	-0.81
	1	FLJ36031	ID_7388	0	-2.47	-3.07	-2.52
	1	LOC162993	ID_7390	0	-1.11	-1.52	-1.49
	1	BRPF3	ID_7415	0	-1.76	-1.98	-2.09
	1	ZNF641	ID_7431	0	-1.46	-1.6	-1.83
	1	ZNF643	ID_7435	0	-1.56	-1.58	-1.52
	1	ZNF644	ID_7436	0	-1.35	-1.56	-1.72
	1	ZNF618	ID_7476	0	-1.83	-1.92	-2.1
	1	RCHY1	ID_7492	0	-0.92	-1.23	-1.28
	1	ZNF621	ID_7508	0	-1.31	-1.41	-0.96
	1	ZNF689	ID_7568	0	-1.87	-1.74	-1.68
	1	ZNF688	ID_7569	0	-0.9	-0.87	-1.04
	1	RTKN	ID_7595	0	-0.83	-1.28	-1.1
	1	ZNF655	ID_7600	0	-0.85	-1.15	-0.7
	1	ZNF652	ID_7605	0	-1.38	-1.77	-1.78
	1	ZNF24	ID_7627	0	-1.08	-0.9	-0.69
	1	ZNF668	ID_7633	0	-2.62	-2.3	-1.9
	1	HSPB2	ID_7689	0	-0.55	-1.16	-0.91
	1	FOSL1	ID_7740	0	-2.9	-5.7	-5.33
	1	SFRS4	ID_7820	0	-1.76	-1.87	-1.7
	1	SFRS5	ID_7822	0	-0.81	-1.27	-1.01
	1	KIAA0323	ID_8001	0	-2.08	-1.68	-2.03
	1	LOC283104	ID_8046	0	-1.12	-2.23	-0.98
	1	RUNX1T1	ID_8075	0	-1.99	-3.24	-2.68
	1	ZNF718	ID_8078	0	-2.09	-2.2	-2.63
	1	ZNF708	ID_8100	0	-1	-1.41	-1.42
	1	FLJ43663	ID_8123	0	-2.4	-3.44	-2.92
	1	JUB	ID_8128	0	-1.36	-1.52	-1.15
	1	DHX35	ID_8144	0	-1.02	-1.13	-0.89
	1	ERMAP	ID_8163	0	-1.38	-1.8	-1.56
	1	ZNF384	ID_8169	0	-0.76	-1	-0.6
	1	KRT33B	ID_8234	0	-0.73	-0.96	-1.04
	1	ZC3H7A	ID_8258	0	-1.02	-1.2	-0.62
	1	ZNF33B	ID_8289	0	-2.52	-2.27	-2.21
	1	SF3A2	ID_8345	0	-1.04	-1.05	-1.04
	1	NRAS	ID_8355	0	-0.66	-1.06	-0.75
	1	DUSP4	ID_8356	0	-0.69	-1.25	-0.9
	1	DUSP3	ID_8358	0	-0.85	-1.1	-1.02
	1	SSNA1	ID_8375	0	-0.71	-1.08	-0.85
	1	DUSP6	ID_8378	0	-1.88	-3.53	-2.23
	1	ZNF300	ID_8394	0	-1.58	-1.11	-1.24
	1	IL1B	ID_8396	0	-2.51	-3.28	-2.8
	1	RNF135	ID_8432	0	-1.7	-1.82	-1.84
	1	CCL2	ID_8439	0	-2.81	-2.79	-1.93
	1	SMARCB1	ID_8460	0	-0.79	-1.55	-1.4
	1	TRAF3IP2	ID_8474	0	-2.63	-3.4	-3.1
	1	NRG1	ID_8519	0	-1.13	-2.26	-1.29
	1	DDB2	ID_8527	0	-0.64	-1.53	-0.93
	1	ARID2	ID_8537	0	-1.15	-1.21	-0.94
	1	DKFZP779L1068	ID_8560	0	-0.92	-1.27	-0.49
	1	HIAT1	ID_8564	0	-0.82	-1.22	-1.07
	1	CTBP1	ID_8713	0	-0.43	-1.02	-0.81
	1	KIAA1718	ID_8809	0	-0.84	-1.19	-1.16
	1	ARFRP1	ID_8820	0	-0.7	-1.13	-1.06
	1	CDK10	ID_8865	0	-1.03	-1.14	-0.89
	1	LOC389289	ID_8874	0	-1.85	-2.11	-2.16
	1	PANK4	ID_8880	0	-0.84	-1.36	-1.21
	1	SPAG7	ID_8958	0	-0.79	-1.87	-1.5
	1	C15ORF37	ID_8996	0	-1.54	-1.56	-1.52
	1	C15ORF44	ID_9004	0	-1.71	-1.32	-1.08
	1	FBXL19	ID_9023	0	-0.65	-1.55	-1.08
	1	NSD1	ID_9083	0	-1.24	-1.3	-1.31
	1	ZNF449	ID_9150	0	-1.21	-1.1	-0.85
	1	ZNF415	ID_9214	0	-1.62	-1.6	-1.6
	1	CDK3	ID_9261	0	-1.53	-1.56	-1.71
	1	PRDM10	ID_9292	0	-3.62	-2.74	-2.49
	1	ZC3HC1	ID_9352	0	-1.25	-1.19	-0.81
	1	LIF	ID_9375	0	-0.78	-1.04	-0.93
	1	NT5C	ID_9423	0	-0.96	-1.47	-1.41
	1	FAM98C	ID_9449	0	-0.78	-1.03	-0.9
	1	YAF2	ID_9462	0	-0.86	-1.19	-0.79
	1	TIAL1	ID_9504	0	-0.99	-1.21	-1.17
	1	KIAA1600	ID_9520	0	-2.1	-2.64	-2.6
	1	LOC644010	ID_9524	0	-1.68	-1.69	-1.24
	1	EGR1	ID_9559	0	-1.72	-2.5	-1.51
	1	CXORF45	ID_9575	0	-1.34	-1.76	-1.8
	1	LOC653256	ID_9626	0	-1.01	-1.76	-1.61
	1	RYR3	ID_9657	0	-1.98	-1.93	-1.92
	1	RAD23A	ID_9670	0	-0.53	-1.05	-0.6
	1	TMEM103	ID_9742	0	-1.59	-1.83	-1.81
	1	KIAA1553	ID_9744	0	-0.83	-1.57	-1.31
	1	TMEM101	ID_9745	0	-0.98	-1.44	-1.22
	1	KIAA1546	ID_9814	0	-1.86	-1.81	-1.54
	1	FKRP	ID_9857	0	-1.18	-1.31	-1.34
	1	KIAA1586	ID_9863	0	-0.93	-1.08	-1.22
	1	CASP7	ID_9902	0	-0.86	-1.41	-1.23
	1	TMEM17	ID_9966	0	-1.67	-2.24	-1.33
	1	C7ORF49	ID_9989	0	-1.37	-1.1	-1.49
	1	C7ORF48	ID_10000	0	-0.93	-1	-1.06
	1	LETM2	ID_10048	0	-1.53	-1.31	-1.01
	1	ALG14	ID_10078	0	-0.8	-1.77	-1.38
	1	GLI2	ID_10090	0	-1.23	-2.34	-1.95
	1	MKX	ID_10101	0	-3.29	-4.79	-4.24
	1	LOC645238	ID_10147	0	-0.46	-1.09	-0.83
	1	LOC644192	ID_10164	0	-0.65	-1.29	-0.96
	1	EIF4ENIF1	ID_10167	0	-0.81	-1.2	-1.2
	1	MX1	ID_10222	0	-1.39	-1.76	-1.79
	1	TMEM80	ID_10268	0	-0.8	-1.34	-1.27
	1	LOC255480	ID_10430	0	-1.14	-2.31	-1.21
	1	LUC7L2	ID_10459	0	-1.08	-1.55	-1.57
	1	ZNF239	ID_10488	0	-1.45	-1.47	-1.26
	1	EIF2S2	ID_10489	0	-0.67	-1.55	-1.36
	1	U1SNRNPBP	ID_10498	0	-1.18	-1.74	-1.17
	1	ZC3HAV1L	ID_10559	0	-1.54	-1.96	-2.02
	1	ZNF289	ID_10560	0	-0.86	-1.9	-1.54
	1	ZNF282	ID_10574	0	-1.18	-1.49	-1.52
	1	CMTM3	ID_10668	0	-1.54	-2.85	-2.41
	1	EIF5	ID_10680	0	-1.13	-1.29	-1.48
	1	TYW3	ID_10815	0	-1.19	-1.94	-1.58
	1	C13ORF25	ID_10833	0	-1.54	-1.5	-1.55
	1	C14ORF102	ID_10879	0	-1.93	-1.42	-1.11
	1	ZFX /// ZFY	ID_10904	0	-3.53	-3.73	-3.6
	1	GLT28D1	ID_10922	0	-0.64	-1.35	-0.92
	1	FJX1	ID_10923	0	-1.47	-2.81	-2.04
	1	CBX3	ID_11015	0	-1.5	-1.22	-1.64
	1	C20ORF194	ID_11018	0	-0.99	-1.68	-1.53
	1	CASD1	ID_11059	0	-1.66	-2.35	-2.41
	1	RABIF	ID_11079	0	-1.52	-1.66	-1.57
	1	LOC644250	ID_11146	0	-2.94	-2.94	-2.94
	1	NAV3 /// LOC652725	ID_11212	0	-2.69	-3.86	-3.86
	1	ADNP	ID_11253	0	-2.49	-2.14	-1.48
	1	LOC285074 /// LOC653	ID_11262	0	-0.79	-1.27	-1.09
	1	BRMS1L	ID_11280	0	-0.78	-0.98	-1.01
	1	ARMCX5	ID_11281	0	-1.15	-1.37	-1.4
	1	D4ST1	ID_11301	0	-0.75	-1.69	-1.1
	1	ENC1	ID_11303	0	-0.94	-2.43	-1.47
	1	RABGGTA	ID_11327	0	-1.11	-2.2	-1.73
	1	PRMT2	ID_11367	0	-0.72	-1.33	-1.27
	1	JMJD1B	ID_11381	0	-0.85	-1.04	-0.93
	1	COBLL1	ID_11396	0	-0.83	-2.12	-1.59
	1	C10ORF88	ID_11458	0	-1.06	-1.2	-1.38
	1	CPEB2	ID_11500	0	-2.27	-2.99	-2.35
	1	C10ORF59	ID_11519	0	-0.69	-1.08	-0.91
	1	BAZ2B	ID_11552	0	-2.9	-2.97	-2.72
	1	C10ORF32	ID_11560	0	-1.26	-2.72	-1.84
	1	FAM119B	ID_11598	0	-0.88	-1.35	-1.2
	1	SLTM	ID_11630	0	-0.97	-1.35	-1.42
	1	LOC90120	ID_11702	0	-1.59	-1.59	-1.87
	1	FLJ33996	ID_11716	0	-1.12	-1.32	-1.29
	1	LARP7	ID_11741	0	-0.94	-1.04	-0.62
	1	LOC286334	ID_11744	0	-1.97	-3.02	-3.06
	1	TUBGCP3	ID_11753	0	-1.92	-1.8	-1.92
	1	RUSC2	ID_11780	0	-0.96	-1.09	-1.05
	1	ACRC	ID_11786	0	-0.6	-1.28	-0.76
	1	ADAMTS6	ID_11799	0	-2.2	-3.46	-2.71
	1	ADAMTS5	ID_11811	0	-1.01	-1.71	-0.66
	1	LOC283658	ID_11832	0	-0.94	-1.11	-1.02
	1	MST150	ID_11866	0	-1.67	-2.32	-1.89
	1	CLOCK	ID_11874	0	-0.59	-1.02	-0.55
	1	FLJ30307	ID_11921	0	-1.34	-1.7	-1.66
	1	DSCR1	ID_11942	0	-2.37	-2.22	-2.46
	1	RBMS1 /// LOC648293	ID_12014	0	-0.57	-1.39	-0.57
	1	LOC283680	ID_12022	0	-1.42	-2.01	-1.41
	1	PAN3	ID_12077	0	-0.88	-1.01	-0.87
	1	NUDT13	ID_12079	0	-1.14	-1.23	-1.15
	1	NUDT15	ID_12081	0	-0.89	-1.33	-1.25
	1	TBX18	ID_12168	0	-1.23	-1.53	-1.56
	1	FAM46A	ID_12172	0	-0.46	-1.07	-0.23
	1	CCDC85A	ID_12222	0	-1.44	-2.04	-1.32
	1	SOCS2	ID_12241	0	-1.44	-2.42	-2.25
	1	SOCS6	ID_12247	0	-2.25	-2.45	-2.84
	1	SOCS5	ID_12250	0	-2.58	-2.7	-1.8
	1	PGAM5	ID_12366	0	-1	-0.97	-1.1
	1	MTX3	ID_12387	0	-1.1	-1.1	-0.66
	1	LZTS2	ID_12413	0	-1.01	-1.5	-1.5
	1	LOC152742	ID_12459	0	-2.18	-3.21	-3.03
	1	KCMF1	ID_12503	0	-0.93	-1.16	-1.04
	1	SFRS2B	ID_12597	0	-0.99	-1.74	-1.53
	1	IAPP	ID_12604	0	-0.77	-1.61	-0.91
	1	TNFSF4	ID_12632	0	-3.85	-4.91	-5.23
	1	KLF6	ID_12681	0	-1.43	-1.71	-0.79
	1	KLF3	ID_12697	0	-1.18	-1.04	-0.91
	1	KRTAP4-12 /// LOC644	ID_12716	0	-1.46	-1.46	-1.46
	1	HMG2L1	ID_12859	0	-1.78	-1.4	-1.63
	1	SFRS2IP	ID_12921	0	-0.79	-1.3	-1.29
	1	HDAC7A	ID_12947	0	-1.21	-2.11	-1.59
	1	PVT1 /// LOC441378	ID_12948	0	-0.48	-1.05	-0.73
	1	EMG1	ID_12960	0	-0.73	-1.67	-1.36
	1	EME2	ID_12981	0	-0.71	-0.95	-1.02
	1	TTC31	ID_13037	0	-1.05	-1.09	-1
	1	ZDHHC4	ID_13038	0	-0.86	-1.13	-0.73
	1	SOS2	ID_13088	0	-1.26	-1.08	-0.8
	1	KCNE4	ID_13100	0	-0.78	-1.06	-1.06
	1	CDC26 /// LOC641788	ID_13125	0	-0.9	-1.04	-0.69
	1	ZBTB4	ID_13127	0	-0.76	-1.36	-0.74
	1	ZBTB2	ID_13130	0	-1.58	-2.83	-2.45
	1	PQLC2	ID_13167	0	-1.18	-1.32	-1.43
	1	MTA3	ID_13177	0	-1.05	-1.59	-1.02
	1	THUMPD2	ID_13223	0	-0.86	-1.5	-1.38
	1	SOLH	ID_13231	0	-0.95	-1	-1.06
	1	SLFN5	ID_13232	0	-0.78	-1.37	-1.23
	1	ZFY	ID_13246	0	-3.53	-3.6	-3.44
	1	ZFX	ID_13248	0	-2.56	-2.26	-1.96
	1	CHD2	ID_13282	0	-0.99	-1.67	-1
	1	RP11-298P3.3	ID_13301	0	-0.82	-1.46	-0.98
	1	PPP1R8	ID_13427	0	-1.24	-1.05	-1.03
	1	LOC286440	ID_13430	0	-0.72	-1.37	-1.21
	1	LOC286437	ID_13444	0	-0.75	-1.03	-0.69
	1	WDR6	ID_13500	0	-0.6	-1.3	-0.82
	1	PCGF2	ID_13518	0	-1.07	-1.23	-1.37
	1	FAM109B	ID_13522	0	-4.59	-4.62	-4.62
	1	ISG20L1	ID_13609	0	-1.68	-2.14	-2.28
	1	KBTBD2	ID_13627	0	-2.1	-2.53	-2.85
	1	PHF14	ID_13739	0	-1.16	-0.93	-0.71
	1	PHF15	ID_13744	0	-3.58	-3.89	-3.93
	1	FLJ31306	ID_13840	0	-0.64	-1.11	-0.55
	1	CYP20A1	ID_13853	0	-0.99	-1.88	-1.78
	1	PRR14	ID_13857	0	-0.83	-0.96	-1.11
	1	IDI2	ID_13922	0	-0.72	-1.22	-0.64
	1	KCTD4	ID_14026	0	-1.96	-1.82	-1.96
	1	URG4	ID_14073	0	-1.5	-1.51	-1.5
	1	C5ORF13	ID_14074	0	-0.9	-1.91	-1.34
	1	LOC152485	ID_14105	0	-1.75	-3.53	-3.27
	1	TOX	ID_14113	0	-1.17	-1.79	-1.72
	1	KIFC3	ID_14133	0	-1	-1.12	-1.12
	1	C9ORF39	ID_14147	0	-1.01	-1.09	-0.87
	1	C9ORF30	ID_14172	0	-1.44	-2.96	-2.67
	1	LOC339287	ID_14214	0	-1.44	-2.14	-1.45
	1	MZF1	ID_14220	0	-0.97	-1.2	-0.94
	1	SRGAP1	ID_14250	0	-1.47	-2.28	-1.72
	1	LRRIQ2	ID_14253	0	-0.99	-0.82	-1.02
	1	ARID1A	ID_14302	0	-0.97	-1.24	-0.69
	1	ARID1B	ID_14303	0	-1.57	-2.02	-1.91
	1	MGC3196	ID_14312	0	-1.36	-1.73	-1.68
	1	AKT1S1	ID_14320	0	-0.8	-1.56	-1.17
	1	TEF	ID_14333	0	-0.44	-1.26	-0.37
	1	ARID3A	ID_14347	0	-0.74	-1.1	-1.14
	1	TRIOBP /// MGC3731	ID_14361	0	-0.84	-1.02	-1.09
	1	ARID5B	ID_14376	0	-1.01	-1.86	-1.63
	1	INPP5E	ID_14400	0	-1.5	-1.53	-1.34
	1	RAVER1	ID_14435	0	-1.06	-1.75	-1.63
	1	BHMT	ID_14455	0	-1.12	-1.52	-1.42
	1	CEP170	ID_14476	0	-1.22	-1.45	-1.43
	1	SPR	ID_14583	0	-0.73	-1.2	-1.11
	1	C9ORF91	ID_14604	0	-1.67	-1.66	-1.76
	1	EPC1	ID_14804	0	-2.95	-2.98	-3.07
	1	EPC2	ID_14805	0	-3.03	-2.57	-1.97
	1	RREB1	ID_14813	0	-1.03	-1.13	-1.1
	1	POLDIP3	ID_14914	0	-1.02	-1.29	-0.89
	1	CMAS	ID_14927	0	-0.76	-1.27	-0.98
	1	TEAD2	ID_14962	0	-1.27	-1.51	-1.51
	1	ABL2	ID_14975	0	-1.05	-1.42	-1.43
	1	IER2	ID_14977	0	-0.92	-1.66	-0.97
	1	DENND4B	ID_15019	0	-1.21	-1.18	-0.95
	1	ZBTB47	ID_15070	0	-0.92	-1.46	-1.47
	1	ZBTB45	ID_15075	0	-1.05	-1.09	-1.13
	1	RNF7	ID_15082	0	-0.75	-1.47	-1.14
	1	ZBTB33	ID_15094	0	-1.01	-1.1	-0.71
	1	ZBTB38	ID_15104	0	-1.85	-2.1	-1.55
	1	ZBTB20	ID_15124	0	-0.5	-1.26	-0.74
	1	CLPX	ID_15242	0	-1.16	-1.02	-1.01
	1	CCDC16	ID_15251	0	-0.69	-1.03	-0.79
	1	C6ORF61	ID_15315	0	-2.11	-2.33	-2.7
	1	C6ORF64	ID_15323	0	-1.77	-1.62	-1.44
	1	CCDC44	ID_15349	0	-1.16	-1.3	-1.3
	1	CCDC59	ID_15382	0	-0.85	-1.03	-1
	1	TMEM87A	ID_15394	0	-1.4	-2.28	-2.28
	1	GSPT2	ID_15416	0	-0.75	-1.32	-1.14
	1	FLJ44894	ID_15422	0	-1.26	-1.27	-1.38
	1	ITFG2	ID_15432	0	-1.78	-2.09	-1.43
	1	LOC130355	ID_15445	0	-0.86	-1.6	-0.37
	1	CCDC94	ID_15467	0	-1.01	-1.32	-0.99
	1	AMACR	ID_15541	0	-1.38	-1.51	-1.63
	1	MCART6	ID_15580	0	-1.03	-1.2	-0.86
	1	NUDT3	ID_15589	0	-0.73	-1.58	-1.35
	1	RFXDC2	ID_15600	0	-0.98	-1.61	-1.3
	1	TCERG1	ID_15612	0	-0.59	-1.01	-0.69
	1	ZFYVE19	ID_15650	0	-0.85	-0.87	-1.04
	1	CCDC101	ID_15653	0	-1.05	-1.17	-1.05
	1	TARBP2	ID_15669	0	-0.84	-1.02	-0.74
	1	CCDC117	ID_15736	0	-1.14	-0.85	-0.73
	1	RKHD2	ID_15738	0	-1.31	-1.91	-1.8
	1	BCDIN3	ID_15773	0	-3.07	-3.93	-4.12
	1	SIAH1	ID_15837	0	-1.67	-1.84	-1.84
	1	MRPL27	ID_15879	0	-0.88	-1.46	-1.34
	1	KIAA2010	ID_15936	0	-1.26	-1.12	-1.27
	1	KIAA2018	ID_15950	0	-2.28	-2.16	-1.23
	1	DUSP12	ID_16059	0	-0.83	-1.04	-0.88
	1	DUSP22	ID_16082	0	-0.82	-1.11	-1.01
	1	E2F3	ID_16219	0	-1.74	-1.95	-1.74
	1	ZFP91	ID_16294	0	-0.95	-1.09	-0.78
	1	VEGFC	ID_16312	0	-2.36	-5.12	-4.42
	1	HAS2	ID_16317	0	-6.47	-7.51	-7.73
	1	COIL	ID_16342	0	-2.11	-1.88	-1.85
	1	GPR180	ID_16404	0	-0.79	-1.1	-1.13
	1	ZFP64	ID_16405	0	-2.34	-2.2	-1.82
	1	PDCD6 /// AHRR	ID_16408	0	-1.14	-1.73	-1.64
	1	PCBP1	ID_16509	0	-0.72	-1.5	-1.2
	1	COQ7	ID_16529	0	-1.11	-1.14	-0.86
	1	C16ORF53	ID_16543	0	-1.58	-2.16	-1.48
	1	SCO2	ID_16590	0	-1.12	-1.05	-0.87
	1	C16ORF28	ID_16594	0	-0.73	-1.06	-0.89
	1	MGC4677	ID_16711	0	-1.2	-1.75	-1.18
	1	PKNOX1	ID_16778	0	-1.26	-1.76	-1.53
	1	YARS2	ID_16805	0	-1.38	-1.51	-1.59
	1	CTPS2	ID_16821	0	-0.86	-1.8	-1.26
	1	TRAF4	ID_16837	0	-0.63	-1.05	-1
	1	F8A1	ID_16902	0	-1.4	-1.26	-1.32
	1	IFNE1	ID_16903	0	-2.35	-3.45	-2.65
	1	SMAD1	ID_16976	0	-2.04	-1.39	-1.27
	1	MGC16385	ID_16994	0	-2.62	-2.21	-2.56
	1	MESDC1	ID_16996	0	-1.83	-2.49	-2.42
	1	SHROOM1	ID_17011	0	-1.24	-2.18	-1.69
	1	SHROOM2	ID_17012	0	-1.03	-0.98	-1.09
	1	PIGW	ID_17098	0	-0.92	-1.48	-1.19
	1	PIGO	ID_17107	0	-0.5	-1.04	-0.56
	1	PPRC1	ID_17245	0	-2.13	-2.56	-2.48
	1	SERPINB3	ID_17298	0	-0.86	-1.01	-1
	1	RABL3 /// LOC653256	ID_17354	0	-0.93	-1.72	-1.52
	1	C1ORF31	ID_17375	0	-0.97	-1.46	-1.21
	1	SPRY2	ID_17386	0	-2.37	-2.65	-2.13
	1	RAF1	ID_17446	0	-0.61	-1.39	-1.09
	1	SIAHBP1	ID_17474	0	-0.67	-1.29	-1.07
	1	HMGN4	ID_17476	0	-0.72	-1.19	-1.08
	1	ANGEL2	ID_17503	0	-1.43	-1.44	-1.64
	1	NCOR1	ID_17524	0	-0.49	-1.05	-0.83
	1	RP11-564C4.1	ID_17615	0	-1.01	-0.76	-0.92
	1	RHOBTB1	ID_17634	0	-1.16	-2.22	-1.15
	1	PHF2	ID_17638	0	-1.53	-3.13	-2.47
	1	C14ORF4	ID_17723	0	-1	-1.58	-0.52
	1	TLK1	ID_17734	0	-1.12	-2.14	-1.9
	1	TLK2	ID_17735	0	-1.49	-1.97	-1.86
	1	UBL4A	ID_17750	0	-0.81	-1.48	-1.33
	1	PHF23	ID_17781	0	-1.4	-1.49	-0.96
	1	TADA2L	ID_17810	0	-1.33	-1.26	-1.33
	1	PPP1R11	ID_17825	0	-0.74	-1.04	-0.78
	1	RARB	ID_18005	0	-1.02	-1.57	-0.87
	1	SUV420H1	ID_18029	0	-2.61	-2	-1.48
	1	C12ORF24	ID_18067	0	-0.72	-1.48	-1.11
	1	C12ORF26	ID_18069	0	-1.65	-1.97	-1.58
	1	SPRED2	ID_18188	0	-0.6	-1.27	-0.66
	1	SPRED1	ID_18189	0	-0.69	-1.34	-1.08
	1	P18SRP	ID_18204	0	-0.87	-1.72	-1.33
	1	DTX3	ID_18267	0	-1.37	-1.78	-1.5
	1	MCRS1	ID_18296	0	-1.07	-1.53	-1.11
	1	LRRC34	ID_18420	0	-0.63	-1.13	-0.61
	1	BRD2	ID_18435	0	-0.75	-1.18	-0.86
	1	LOC440895	ID_18448	0	-1.42	-2.54	-2.4
	1	TRIM21	ID_18458	0	-1.27	-1.47	-1.59
	1	C4ORF8	ID_18465	0	-1.54	-1.56	-1.45
	1	TIA1	ID_18484	0	-0.84	-1.05	-0.95
	1	BRI3	ID_18489	0	-0.74	-1.4	-1.24
	1	ZCCHC3	ID_18555	0	-1.77	-1.96	-2.01
	1	TIFA	ID_18559	0	-0.8	-1.66	-1.29
	1	CSRP2BP	ID_18590	0	-1.08	-0.92	-0.77
	1	DNAJB12	ID_18606	0	-0.98	-2.01	-1.68
	1	CHRAC1	ID_18619	0	-1.41	-1.87	-1.56
	1	BHMT2	ID_18644	0	-1.09	-2.14	-1.82
	1	TRIM39	ID_18764	0	-1.89	-1.68	-1.96
	1	BLOC1S2	ID_18784	0	-1.36	-1.71	-1.52
	1	SPIN2 /// SPIN-2	ID_18839	0	-1.29	-1.74	-1.53
	1	DGCR8	ID_18854	0	-0.98	-1.49	-1.4
	1	SUHW4	ID_18859	0	-1.57	-1.97	-2.08
	1	BRCC2	ID_18869	0	-1.23	-1.22	-1.24
	1	ZFP161	ID_18885	0	-1.05	-1.06	-0.97
	1	ZC3H12C	ID_18910	0	-1.71	-2.01	-1.99
	1	LOC440944	ID_18919	0	-1.63	-1.52	-1.3
	1	CXORF10 /// LOC64817	ID_18939	0	-0.9	-0.96	-1.11
	1	MAP2K7	ID_18947	0	-1.76	-1.36	-1.22
	1	KLF11	ID_19007	0	-0.93	-1.3	-1.3
	1	ZIC1	ID_19149	0	-1.12	-1.24	-1.14
	1	SIX5	ID_19165	0	-1.51	-2.1	-1.67
	1	RHOJ	ID_19216	0	-1.82	-2.52	-2.35
	1	HMGA2	ID_19248	0	-4.6	-7.48	-7.19
	1	NCOA6	ID_19259	0	-1.5	-1.52	-1.6
	1	IFIT3	ID_19282	0	-1.61	-2.66	-2.1
	1	FLJ20309	ID_19298	0	-1.49	-1.42	-1.39
	1	NUP62	ID_19340	0	-1.56	-1.74	-1.69
	1	FCRLB	ID_19366	0	-0.53	-1.26	-0.96
	1	CC2D1B	ID_19388	0	-1.31	-1.63	-1.25
	1	POLR3D	ID_19411	0	-1.16	-1.09	-0.84
	1	RUNX2	ID_19469	0	-1.96	-2.56	-1.73
	1	NR6A1	ID_19485	0	-1.16	-1.35	-1.41
	1	N4BP2	ID_19514	0	-1.37	-1.33	-1.39
	1	ISGF3G	ID_19540	0	-1.85	-2.16	-1.72
	1	PIK3CA	ID_19554	0	-0.75	-1.32	-1.13
	1	PDPN	ID_19564	0	-0.89	-1.04	-1.19
	1	SMURF1	ID_19605	0	-0.97	-1.58	-1.38
	1	LOC90355	ID_19619	0	-1.76	-1.87	-1.33
	1	KTI12	ID_19649	0	-1.01	-1.15	-0.51
	1	PDHX	ID_19651	0	-0.67	-1.08	-1.01
	1	FLJ21272	ID_19660	0	-2.73	-2.98	-2.73
	1	PHACTR2	ID_19743	0	-0.52	-1.47	-0.84
	1	CHKB /// CPT1B	ID_19757	0	-1.46	-1.53	-1.5
	1	TGIF	ID_19833	0	-2.16	-2.16	-1.27
	1	GABPB2	ID_19911	0	-1.2	-0.95	-0.99
	1	YRDC	ID_19951	0	-1.37	-1.42	-1.29
	1	LOC51334	ID_19993	0	-0.99	-1.48	-0.73
	1	HOXD11	ID_20000	0	-0.85	-1.43	-1.32
	1	MAGI2	ID_20006	0	-0.72	-1.34	-0.64
	1	HTATIP	ID_20013	0	-1.15	-1.28	-1.11
	1	PCNT	ID_20038	0	-0.92	-1	-1.14
	1	NAB2	ID_20072	0	-0.76	-1.17	-0.9
	1	PDE4B	ID_20140	0	-1.86	-4.04	-3.56
	1	CTDSP1	ID_20141	0	-1.59	-1.99	-1.84
	1	THBD	ID_20152	0	-1.85	-1.89	-1.91
	1	TOMM40L	ID_20193	0	-1.01	-1.33	-1.22
	1	MID1IP1	ID_20222	0	-1.01	-1.14	-0.5
	1	CTF8	ID_20270	0	-1.09	-1.16	-1.23
	1	AADAT	ID_20292	0	-0.61	-1.45	-1.08
	1	CREBBP	ID_20354	0	-1.4	-1.36	-1
	1	AHSA2	ID_20370	0	-1.33	-1.47	-1.13
	1	PBX2	ID_20445	0	-1.45	-1.82	-0.86
	1	WIBG	ID_20459	0	-1.86	-2.06	-1.81
	1	HECTD2	ID_20498	0	-1.05	-1.21	-1.24
	1	FLJ11171	ID_20519	0	-1.34	-1.07	-1.06
	1	C11ORF68	ID_20548	0	-1.58	-2.16	-1.07
	1	C11ORF75	ID_20575	0	-1.07	-1.04	-1.1
