# Supplementary material for: Systematic Analysis of Time-Series Gene Expression Data on Tumor Cell-Selective Apoptotic Responses to HDAC Inhibitors
Source: Comput Math Methods Med. 2014 Oct 13;2014:867289. doi: 10.1155/2014/867289 (PMC4211306; doi:10.1155/2014/867289)
Supplement: Supplementary file 1 — Table S1. H-score of all pathways for tumor and normal samples: This table lists the name, category, website and H-score values for all 1307 pathway. Table S2. Illustrative pathways belonging to term "No responding": This table lists the name, category, website and TVPC patterns for "No responding" pathways. Table S3. Illustrative pathways belonging to term "Consistent responding": This table lists the name, category, website and TVPC patterns for "Consistent responding" pathways. Table S4. Illustrative pathways belonging to term "Tumor specific responding": This table lists the name, category, website and TVPC patterns for "Tumor specific responding" pathways. Table S5. Illustrative pathways belonging to term "Normal specific responding": This table lists the name, category, web site and TVPC patterns for "Normal specific responding" pathways. Table S6. Illustrative pathways belonging to term "Divergent responding": This table lists the name, category, website and TVPC patterns for "Divergent responding" pathways. Table S7. Genes within profile #0 for normal samples: This table contains all genes within profile #0 for normal samples, and lists the normalized expression data to the right of gene symbol. Table S8. Genes within profile #2 for normal samples: This table contains all genes within profile #2 for normal samples, and lists the normalized expression data to the right of gene symbol. Table S9. Genes within profile #9 for normal samples: This table contains all genes within profile #9 for normal samples, and lists the normalized expression data to the right of gene symbol. Table S10. Genes within profile #12 for normal samples: This table contains all genes within profile # 12 for normal samples, and lists the normalized expression data to the right of gene symbol. Table S11. Genes within profile #14 for normal samples: This table contains all genes within profile #14 for normal samples, and lists the normalized expression data to the right of gene symbol. Ta [file 867289.f1.zip › 867289.f1/Table S8.xls]

## Sheet: Sheet1
Gene Table for Profile 2 (0.0,-1.0,-2.0,-3.0) Normal
Num. Genes Expected	Num. Genes Assigned	P-Value	Significant
1390	262.9	0	(significant)
-------
Selected	Weight	Gene Symbol	SPOT	0h	4h	12h	24h
	1	TFPT	ID_22	0	-0.81	-1.22	-1.64
	1	BTBD6	ID_29	0	-0.98	-1.81	-2.69
	1	DDX11 /// DDX12 ///	ID_54	0	-0.79	-0.97	-1.22
	1	PPAPDC1B	ID_55	0	-0.53	-1.71	-1.72
	1	PPAPDC1A	ID_59	0	-0.45	-2	-3.26
	1	PARP3	ID_75	0	-0.36	-0.6	-2.03
	1	PARP2	ID_82	0	-1.22	-0.86	-1.38
	1	SNORA24	ID_84	0	-0.4	-1.14	-1.01
	1	MGRN1	ID_91	0	-0.29	-0.49	-1.02
	1	ANP32B	ID_101	0	-0.43	-1.78	-1.96
	1	ANP32E	ID_105	0	-0.15	-0.86	-1.25
	1	PARVB	ID_116	0	-0.63	-1.26	-1.47
	1	PARVA	ID_117	0	-0.47	-0.83	-1.68
	1	UGDH	ID_128	0	-0.11	-1.3	-1.96
	1	DOM3Z	ID_135	0	-0.62	-1.11	-1.77
	1	C20ORF4	ID_144	0	-0.43	-0.82	-1.13
	1	MLSTD1	ID_150	0	-0.56	-2.41	-2.47
	1	SPATA20	ID_153	0	-0.65	-0.92	-1.09
	1	NET1	ID_173	0	0.21	-1.22	-2.38
	1	SPATA18	ID_180	0	-0.65	-2.05	-2.87
	1	C13ORF3	ID_191	0	-0.87	-0.92	-2.98
	1	QSER1	ID_210	0	-0.57	-0.93	-1.01
	1	MANEA	ID_216	0	-0.29	-1.44	-2.81
	1	ARHGDIA	ID_220	0	-0.55	-1.02	-1.86
	1	ATF4	ID_233	0	-1.27	-1.8	-1.98
	1	HINT1	ID_251	0	-0.49	-0.73	-1.19
	1	IMPDH1	ID_265	0	-0.21	-0.77	-1.13
	1	NEXN	ID_270	0	-1.13	-5.05	-5.95
	1	GAL	ID_272	0	-0.22	-0.78	-1.12
	1	CUTL1	ID_301	0	-0.33	-1.19	-1.41
	1	PPCS	ID_320	0	-0.74	-1.27	-1.26
	1	WWP2	ID_323	0	-0.52	-1.01	-1.27
	1	FUS	ID_345	0	-0.03	-0.68	-1.81
	1	NEK3	ID_347	0	-1.01	-1.31	-1.63
	1	IER3IP1	ID_394	0	-0.33	-0.98	-1.13
	1	MRAS /// LOC653764	ID_404	0	-0.01	-0.88	-1.69
	1	STEAP1	ID_410	0	-0.08	-1.29	-1.86
	1	APOBEC3C	ID_444	0	-0.13	-0.57	-1.58
	1	RAI16	ID_458	0	-0.68	-1.26	-1.66
	1	PPIF	ID_487	0	-0.77	-1.66	-3.17
	1	ANTXR2	ID_504	0	-0.11	-1.59	-2.24
	1	SCMH1	ID_508	0	-0.79	-1.46	-1.53
	1	MDM2	ID_535	0	-0.45	-1.72	-1.97
	1	CAMK2D	ID_546	0	-0.25	-1.35	-1.59
	1	PNRC2 /// LOC644047	ID_565	0	-0.62	-0.86	-1.5
	1	ENDOG	ID_570	0	-0.59	-1.62	-2.19
	1	CUEDC1	ID_573	0	-0.73	-0.8	-1.31
	1	FLJ39378	ID_582	0	-0.48	-1.31	-1.65
	1	ACBD5	ID_586	0	-0.47	-0.89	-1.18
	1	MALL	ID_589	0	-0.82	-2.45	-3.9
	1	PTPRF	ID_602	0	-0.06	-0.61	-1.37
	1	PTPRG	ID_603	0	0	-0.56	-1.31
	1	UFC1	ID_653	0	-0.62	-1.53	-2.58
	1	ARHGEF2	ID_671	0	-0.9	-1.69	-1.64
	1	HK2	ID_692	0	0.18	-0.92	-1.43
	1	GNG11	ID_696	0	-0.35	-1.21	-2.41
	1	RAB6A /// RAB6C	ID_712	0	-0.36	-0.97	-1.28
	1	CCRL1	ID_783	0	-1.08	-7.13	-7.67
	1	IPO4	ID_798	0	-0.13	-0.75	-1.21
	1	NFYC	ID_803	0	-1.16	-1.82	-1.91
	1	SH2B3	ID_817	0	-0.37	-1.15	-1.4
	1	ADCY7	ID_842	0	-0.56	-2.25	-3.15
	1	FLJ14346	ID_874	0	-0.58	-0.74	-1.01
	1	NR2F6	ID_931	0	-0.2	-1.01	-1.17
	1	DOCK10	ID_934	0	-1.05	-3.14	-3.38
	1	AVEN	ID_946	0	-0.78	-1.62	-2.17
	1	C14ORF32	ID_950	0	-0.52	-0.91	-1.05
	1	PLEK2	ID_951	0	-0.1	-0.95	-1.65
	1	ARNT2	ID_976	0	-1.96	-3.47	-3.89
	1	SLC4A2	ID_995	0	-0.13	-0.81	-1.69
	1	SLC4A4	ID_998	0	-0.65	-2.15	-2.31
	1	COPZ2	ID_1015	0	-0.62	-1.05	-1.31
	1	MGC4677 /// LOC54147	ID_1016	0	-0.28	-1.39	-1.53
	1	PTPLA	ID_1025	0	-0.4	-1.23	-2.22
	1	MAFF	ID_1042	0	-0.87	-2.7	-2.38
	1	FTSJ2	ID_1073	0	-0.17	-0.53	-1.18
	1	IFNGR2	ID_1074	0	-0.85	-1.94	-1.91
	1	MELK	ID_1097	0	-0.35	-0.98	-2.77
	1	SH3GLB1	ID_1110	0	-0.66	-1.5	-1.49
	1	TDP1	ID_1130	0	-0.29	-0.81	-1.98
	1	NFIC	ID_1134	0	-0.57	-1.66	-2.43
	1	HNRPF	ID_1139	0	-0.22	-0.98	-1.14
	1	ARL8A	ID_1175	0	-0.58	-1.1	-1.53
	1	KIAA1913	ID_1191	0	-0.42	-1.87	-2.06
	1	PEA15	ID_1197	0	-0.49	-0.96	-1.27
	1	VDAC1	ID_1216	0	-0.38	-0.63	-1.06
	1	APCDD1L	ID_1218	0	-0.03	-0.92	-1.79
	1	KDELR3	ID_1238	0	-0.22	-0.91	-1.18
	1	KDELR2	ID_1240	0	-0.1	-0.52	-1.1
	1	HDGFRP3	ID_1278	0	-0.57	-2.21	-3.25
	1	FLJ10292	ID_1294	0	-0.6	-1.83	-1.89
	1	NTNG1	ID_1303	0	-0.64	-1.91	-2.91
	1	CXCL12	ID_1322	0	-0.13	-0.7	-2.01
	1	DTYMK /// LOC643109	ID_1325	0	-0.58	-1.29	-2.33
	1	NP	ID_1352	0	-0.23	-1.13	-1.92
	1	KDELC2	ID_1359	0	-0.27	-0.77	-1.65
	1	HIST1H4C	ID_1368	0	-0.01	-1.07	-1.54
	1	LRRFIP2	ID_1417	0	-0.06	-0.77	-1.17
	1	LOC57228	ID_1424	0	-1.4	-3.38	-3.05
	1	TXNRD2	ID_1429	0	-0.57	-0.93	-2.07
	1	ZBED1	ID_1449	0	-0.73	-1.98	-2.17
	1	ID1	ID_1454	0	-0.88	-2.14	-3.84
	1	ID3	ID_1459	0	-0.53	-0.9	-3.47
	1	PRKX	ID_1466	0	-0.66	-1.04	-1.11
	1	NSMAF	ID_1470	0	-0.81	-2.7	-3.71
	1	RTCD1	ID_1511	0	-0.54	-1.11	-1.07
	1	EPHA2	ID_1523	0	-0.41	-2.82	-3.22
	1	CDCP1	ID_1540	0	-0.12	-1.23	-1.93
	1	APBA2	ID_1588	0	-0.18	-1.13	-1.21
	1	BIRC4	ID_1598	0	-1.18	-1.41	-1.76
	1	BIRC2	ID_1600	0	-0.63	-1.04	-1.12
	1	HYI	ID_1602	0	-0.34	-1.19	-1.66
	1	PLXNA2	ID_1621	0	0.17	-1.92	-2.71
	1	PLXNB2	ID_1639	0	-0.16	-1.05	-1.74
	1	MRGPRF	ID_1644	0	-0.86	-3.11	-3.27
	1	PRR6	ID_1660	0	-0.46	-0.84	-1.96
	1	PLXND1	ID_1667	0	-0.11	-1	-1.35
	1	FLJ14668	ID_1680	0	-1.06	-1.91	-2.67
	1	DNMT1	ID_1684	0	-0.54	-1.2	-2.2
	1	C18ORF24	ID_1704	0	-1.02	-1.72	-4.09
	1	HNT	ID_1717	0	-0.14	-1.17	-2.71
	1	COMMD7	ID_1733	0	-0.56	-1.89	-2.96
	1	COMMD4	ID_1739	0	-0.47	-0.82	-1.34
	1	NGFB	ID_1743	0	0.16	-1.27	-1.57
	1	MGC5370	ID_1760	0	-0.67	-1.69	-2.1
	1	SLC5A6	ID_1781	0	-0.16	-0.39	-1.41
	1	PEAR1	ID_1797	0	-0.02	-1.05	-1.24
	1	CDCA8	ID_1808	0	-0.91	-1.57	-4.18
	1	CDCA7	ID_1809	0	-0.82	-1	-1.89
	1	CDCA5	ID_1815	0	-1.01	-2.02	-4.83
	1	CDCA4	ID_1816	0	-0.43	-1.44	-2.62
	1	MAGED2	ID_1824	0	-0.18	-0.83	-1.99
	1	PDCD1LG2	ID_1825	0	-0.83	-5.01	-5.86
	1	CENTD3	ID_1861	0	-0.67	-1.03	-1.17
	1	TCF4	ID_1863	0	-0.35	-2.14	-2.35
	1	PLEKHJ1	ID_1872	0	-0.41	-0.92	-1.26
	1	FLJ25476	ID_1907	0	-1.81	-3.25	-3.82
	1	TCHP	ID_1910	0	-0.75	-1.38	-2.27
	1	MGC26963	ID_1912	0	0.14	-0.52	-0.93
	1	PLEKHF2	ID_1935	0	-0.7	-0.85	-1.1
	1	HERPUD1	ID_1990	0	-0.17	-1.22	-2.04
	1	CYB5R2	ID_2022	0	-0.41	-0.92	-1.02
	1	TENC1	ID_2026	0	-1.41	-1.8	-2.46
	1	BCL7C	ID_2100	0	-0.22	-0.74	-1.03
	1	DONSON	ID_2145	0	-0.4	-0.91	-1.2
	1	SMYD2	ID_2146	0	-0.68	-1.27	-1.48
	1	DZIP1L	ID_2159	0	-1.1	-1.68	-1.74
	1	TRMT1	ID_2174	0	-0.44	-1.27	-1.44
	1	LOC400043	ID_2208	0	-0.44	-1.01	-1.48
	1	TMEM106A /// LOC6533	ID_2232	0	-0.85	-1.84	-2.11
	1	RBM24	ID_2234	0	-0.88	-2.1	-2.03
	1	ABCC3	ID_2248	0	-0.35	-1.54	-3.33
	1	C20ORF59	ID_2264	0	-0.45	-1.85	-3.19
	1	RBM10	ID_2282	0	-0.61	-1.23	-1.65
	1	RBM13	ID_2285	0	-0.11	-1.05	-1.25
	1	SGOL1	ID_2291	0	-0.46	-0.54	-1.92
	1	C20ORF72	ID_2302	0	-0.87	-1.37	-2.45
	1	PSMB5	ID_2313	0	-0.46	-1.07	-1.39
	1	PSMB8	ID_2343	0	-0.93	-2.53	-3.57
	1	DUS1L	ID_2389	0	-0.55	-0.82	-1.18
	1	MCM2	ID_2409	0	-0.27	-0.55	-2.06
	1	MCM3	ID_2410	0	-0.14	-0.91	-1.91
	1	MCM6	ID_2415	0	-0.26	-1	-1.87
	1	BTG3	ID_2424	0	-0.37	-1.47	-1.99
	1	C20ORF39	ID_2432	0	-1.18	-2.67	-3.07
	1	MIRN21	ID_2442	0	-0.22	-1.21	-1.79
	1	SLC6A9	ID_2464	0	-0.77	-1.45	-1.56
	1	MGST1	ID_2478	0	-0.19	-0.88	-2.44
	1	MGST2	ID_2481	0	-0.34	-1.05	-1.37
	1	VPS52	ID_2485	0	-0.47	-0.93	-1.03
	1	FOXF2	ID_2498	0	-2.24	-4.04	-4.08
	1	SERF1A	ID_2520	0	-0.65	-1.6	-2.02
	1	GARS	ID_2533	0	-0.12	-1.26	-1.65
	1	USP11	ID_2564	0	-0.32	-0.71	-1.13
	1	USP13	ID_2575	0	-0.66	-2.22	-2.04
	1	FOXC2	ID_2596	0	-0.92	-2.2	-2.93
	1	USP36	ID_2618	0	-0.44	-1.62	-1.82
	1	FOXD1	ID_2622	0	-0.76	-1.86	-2.3
	1	IL15RA	ID_2660	0	-0.5	-1.06	-1.08
	1	PKIG	ID_2666	0	-0.23	-1.4	-1.81
	1	FBXW4	ID_2701	0	-0.86	-2.01	-2.58
	1	SLC7A11	ID_2740	0	-0.87	-1.88	-1.93
	1	CD109	ID_2764	0	0.02	-0.6	-1.14
	1	CEBPG	ID_2793	0	-1.32	-1.41	-1.74
	1	PHLPPL	ID_2795	0	-0.71	-1.37	-2.54
	1	VPS24	ID_2802	0	-0.61	-1.04	-1.12
	1	CBS	ID_2808	0	-0.25	-0.78	-1.67
	1	FBXL6	ID_2874	0	-0.21	-0.56	-1.33
	1	FBXO5	ID_2892	0	-1.61	-3.02	-5.87
	1	GBE1	ID_2917	0	-0.16	-0.96	-2.38
	1	VPS37C	ID_2933	0	-0.6	-0.66	-1.04
	1	GBAS	ID_2944	0	-0.64	-1.03	-1.19
	1	SEMA3A	ID_2953	0	0.06	-1.58	-3.29
	1	NIP7	ID_2965	0	-0.54	-1.17	-1.24
	1	BID	ID_2994	0	-0.49	-1.31	-2.61
	1	BIC	ID_2995	0	-1.22	-4.42	-4.6
	1	MORC4	ID_3000	0	-0.33	-0.75	-1.16
	1	UBTF	ID_3020	0	-1.12	-1.72	-2.03
	1	RBMS3	ID_3039	0	-0.18	-2.69	-3.17
	1	IFRD2	ID_3045	0	-0.84	-1.38	-1.54
	1	FOXN2	ID_3054	0	-0.72	-1.32	-1.38
	1	LOC651619	ID_3055	0	0.04	-1.08	-1.67
	1	GBP3	ID_3062	0	-0.43	-2.56	-4.29
	1	DAZAP1	ID_3070	0	-0.56	-1.21	-1.42
	1	CFLAR	ID_3079	0	-1.35	-3.11	-3.69
	1	FOXP1	ID_3092	0	-0.34	-1.27	-1.39
	1	BOK	ID_3107	0	-0.45	-0.81	-1.39
	1	BOC	ID_3109	0	-0.67	-1.2	-1.45
	1	TARS	ID_3117	0	-0.38	-0.91	-1.07
	1	FOXM1	ID_3123	0	-1.03	-1.72	-3.15
	1	BMPER	ID_3150	0	-0.48	-2.41	-2.98
	1	SYDE1	ID_3155	0	-1.65	-2.86	-2.9
	1	THRAP4	ID_3157	0	-0.22	-1.06	-1.57
	1	WSB2	ID_3159	0	-0.66	-2.11	-3.03
	1	THRAP5	ID_3162	0	-0.88	-1.7	-1.65
	1	MASP1	ID_3166	0	-0.34	-1.26	-2.24
	1	CCNA2	ID_3179	0	-0.06	-0.92	-2.11
	1	PLAUR	ID_3189	0	-0.84	-2.31	-2.77
	1	ATAD3A /// ATAD3B //	ID_3200	0	-0.35	-1.2	-1.7
	1	CCNE2	ID_3234	0	-0.88	-1.82	-2.61
	1	CCND1	ID_3249	0	-0.41	-2.01	-3.25
	1	ILVBL	ID_3265	0	-0.08	-1.2	-2.02
	1	SHMT2	ID_3270	0	-0.41	-0.89	-1.68
	1	CYORF14	ID_3275	0	-0.52	-1.15	-1.12
	1	RCBTB2	ID_3309	0	-1.14	-3.22	-3.61
	1	HIRIP3	ID_3313	0	-0.88	-1.42	-1.47
	1	PLK4	ID_3364	0	-1.46	-1.78	-4.14
	1	PLK1	ID_3368	0	-0.78	-1.84	-3.75
	1	DEK	ID_3376	0	-0.16	-0.81	-1.44
	1	FRMD3	ID_3381	0	-0.57	-0.54	-1.27
	1	NUP85	ID_3404	0	-0.11	-0.97	-1.61
	1	DCK	ID_3421	0	-0.56	-1.34	-2.89
	1	CDKAL1	ID_3425	0	-0.33	-0.76	-1.01
	1	DCI	ID_3429	0	-0.57	-0.7	-1.51
	1	PLP2	ID_3438	0	-0.33	-0.85	-2.48
	1	ALPK2	ID_3443	0	-0.65	-2.38	-2.32
	1	ITPA	ID_3453	0	-0.63	-2.38	-2.95
	1	NOL5A	ID_3500	0	-0.52	-1.62	-2.62
	1	IGF2BP3	ID_3524	0	-0.91	-1.97	-2.58
	1	TRPC4	ID_3542	0	0.17	-1.62	-2.36
	1	PMF1	ID_3550	0	-0.63	-1.81	-2.71
	1	FLJ10357	ID_3551	0	-0.52	-1.75	-2.17
	1	LCORL	ID_3594	0	-0.57	-1.05	-1.4
	1	SEC14L2	ID_3604	0	-0.05	-1.18	-1.32
	1	CLEC2B	ID_3607	0	-1.06	-2.53	-2.71
	1	RABEP2 /// LOC652743	ID_3705	0	-1.37	-3.13	-4.2
	1	CSE1L	ID_3706	0	-0.1	-0.55	-1.55
	1	GALC	ID_3714	0	-0.3	-0.87	-1.91
	1	RNF14	ID_3720	0	-1.19	-1.03	-1.42
	1	MGC13379	ID_3725	0	-0.94	-1.38	-2.29
	1	LOC58489	ID_3754	0	-0.89	-2.05	-2.3
	1	LOC58486	ID_3769	0	-1.1	-1.2	-1.48
	1	ARHGAP1	ID_3773	0	-0.26	-0.84	-1.54
	1	KIAA0515	ID_3805	0	-0.44	-1.95	-2.21
	1	LOC653784	ID_3808	0	-0.6	-0.94	-1.28
	1	MINA	ID_3819	0	-0.81	-1.23	-1.56
	1	LOC554202	ID_3827	0	-0.96	-2.26	-2.65
	1	PLAC8	ID_3840	0	-0.82	-1.9	-2.16
	1	CTHRC1	ID_3852	0	-0.28	-1.65	-3.82
	1	MAPK6	ID_3874	0	-0.92	-1.39	-1.45
	1	ARF6	ID_3886	0	-0.58	-0.88	-1.1
	1	TCEAL8	ID_3966	0	-0.68	-1.51	-1.57
	1	TCEAL4	ID_3972	0	-0.18	-0.64	-1.23
	1	P2RY5	ID_4002	0	-1.69	-3.2	-3.72
	1	EFS	ID_4013	0	-3.25	-4.96	-5.23
	1	P2RX5	ID_4016	0	-0.38	-1.07	-1.53
	1	BTN2A1	ID_4085	0	-0.65	-1.38	-1.81
	1	GPSM1	ID_4096	0	-0.11	-1.29	-1.74
	1	SC65	ID_4108	0	-0.22	-0.82	-1.36
	1	PRKCDBP	ID_4143	0	-0.85	-1.86	-3.57
	1	HES1	ID_4147	0	-0.43	-1.53	-1.65
	1	PNKP	ID_4148	0	-0.41	-0.62	-1.16
	1	HES4	ID_4153	0	-0.2	-0.54	-1.52
	1	MLLT11	ID_4157	0	-0.22	-2.04	-2.12
	1	BTN3A3	ID_4159	0	-0.27	-1.19	-1.23
	1	TPD52L2	ID_4180	0	-0.52	-1.08	-1.68
	1	ARSI	ID_4208	0	-0.62	-1.22	-1.62
	1	ARSJ	ID_4209	0	-0.77	-2.74	-4.07
	1	LY96	ID_4221	0	-0.28	-1.03	-1.71
	1	TSTA3	ID_4246	0	-0.53	-0.83	-1.62
	1	COX7A1	ID_4256	0	-0.59	-1.08	-1.61
	1	LY6K	ID_4259	0	-0.4	-1.17	-2.7
	1	F2RL2	ID_4267	0	0.17	-0.95	-1.83
	1	ASAM	ID_4269	0	-0.45	-3.31	-5.98
	1	DSP	ID_4300	0	-0.16	-1.04	-1.89
	1	DIAPH2	ID_4312	0	-0.15	-1	-2.11
	1	CORO2B	ID_4318	0	-0.85	-3.31	-3.41
	1	MRVI1	ID_4349	0	-1.17	-4.43	-4.65
	1	SCOTIN	ID_4350	0	-0.39	-0.96	-1.3
	1	EVI2A	ID_4351	0	-1.1	-3.65	-3.76
	1	CHST3	ID_4363	0	-0.92	-3.68	-3.82
	1	EXOSC10	ID_4381	0	-0.79	-2.06	-2.31
	1	PYCARD	ID_4383	0	-0.4	-0.97	-1.87
	1	GEMIN4	ID_4388	0	-0.76	-0.87	-2.36
	1	RANGAP1	ID_4411	0	-0.25	-0.98	-1.61
	1	WDR74	ID_4414	0	-0.94	-1.55	-1.83
	1	WDR76	ID_4423	0	-0.52	-1.18	-1.5
	1	FAP	ID_4424	0	-0.11	-0.7	-1.18
	1	FAS	ID_4431	0	-1.3	-3.82	-4.32
	1	C10ORF6	ID_4442	0	-1.29	-1.64	-2.12
	1	WDR90	ID_4444	0	-0.68	-0.8	-1.1
	1	NME4	ID_4447	0	-0.76	-1.09	-1.47
	1	MTHFD2	ID_4509	0	-0.5	-1.21	-1.88
	1	WDR45	ID_4548	0	-0.55	-1.41	-1.38
	1	WDR18	ID_4558	0	-0.46	-0.87	-1
	1	WDR13	ID_4567	0	-0.94	-2.34	-2.63
	1	ASPN	ID_4593	0	-0.55	-1.19	-1.68
	1	PITPNC1	ID_4617	0	-0.16	-0.97	-1.45
	1	DDX39	ID_4637	0	-0.37	-0.97	-1.19
	1	RBPMS	ID_4638	0	-0.66	-2.55	-3.51
	1	ASS1	ID_4646	0	-0.35	-0.86	-1.22
	1	DDX41	ID_4664	0	-0.17	-0.6	-1.16
	1	GINS1	ID_4668	0	-0.18	-0.9	-1.81
	1	GINS3	ID_4671	0	-2.1	-3.26	-4.17
	1	DDX56	ID_4681	0	-0.21	-0.84	-1.13
	1	TMEM76 /// LOC643642	ID_4714	0	-0.54	-1.4	-1.72
	1	LOXL4	ID_4720	0	-0.36	-2.33	-3.64
	1	LOXL3	ID_4721	0	-0.29	-0.96	-2.04
	1	SEC24D	ID_4724	0	-0.64	-1.17	-1.72
	1	ASNS	ID_4751	0	-0.24	-0.77	-1.32
	1	U2AF2	ID_4783	0	-0.51	-1.31	-1.59
	1	POLE	ID_4808	0	-0.29	-0.61	-1.77
	1	ELN	ID_4823	0	-0.27	-0.99	-2.31
	1	POLS	ID_4836	0	-0.47	-0.78	-1.25
	1	PON2	ID_4854	0	-0.27	-0.75	-1.47
	1	ENG	ID_4856	0	-0.28	-0.93	-1.77
	1	GENX-3414	ID_4859	0	-0.99	-1.25	-1.57
	1	LOC388335	ID_4906	0	-0.81	-1.79	-1.83
	1	SPOCD1	ID_4931	0	-0.9	-2.93	-4.25
	1	HDGF	ID_4947	0	-0.58	-1.22	-2.2
	1	EVC	ID_4960	0	-0.33	-0.87	-1.42
	1	KIAA0701	ID_4986	0	-0.33	-0.87	-1.33
	1	MGLL	ID_5001	0	-0.56	-1.74	-2.95
	1	UCK2	ID_5034	0	-0.41	-1.39	-1.67
	1	ERF	ID_5037	0	-0.59	-1.62	-1.47
	1	UBE2J1	ID_5071	0	-0.74	-1.89	-2.19
	1	EIF2AK2	ID_5081	0	-0.14	-0.92	-1.13
	1	MYOHD1	ID_5087	0	-0.96	-2.17	-2.02
	1	KISS1	ID_5127	0	-0.43	-0.68	-1.02
	1	PRTFDC1	ID_5132	0	-0.51	-0.85	-1.74
	1	EIF4A1	ID_5140	0	-0.23	-0.76	-1.09
	1	MTMR2	ID_5154	0	-0.53	-1.37	-1.94
	1	MTMR1	ID_5156	0	-0.68	-1.37	-1.31
	1	KIAA1345	ID_5157	0	-0.66	-1.11	-1.56
	1	ACOT2 /// ACOT1 ///	ID_5170	0	-1.01	-2.43	-2.67
	1	LOC348262	ID_5179	0	-0.72	-1.21	-1.9
	1	EIF4EBP1	ID_5196	0	-0.59	-0.97	-1.08
	1	MDFIC	ID_5202	0	-0.71	-2.47	-3.3
	1	CDKN2C	ID_5203	0	-0.35	-0.78	-1.1
	1	EIF3S7	ID_5209	0	-0.41	-1.16	-1.55
	1	EDG1	ID_5210	0	-0.43	-1.22	-1.11
	1	EDG2	ID_5215	0	-0.72	-2.62	-2.48
	1	ATP9A	ID_5237	0	-0.3	-1.07	-2.66
	1	UBXD1	ID_5314	0	-0.52	-0.77	-1.14
	1	SNX21	ID_5375	0	-0.28	-1.03	-1.27
	1	UBE2Q2	ID_5391	0	-0.8	-2.07	-2.73
	1	STAT5B	ID_5407	0	-0.22	-1.08	-1.67
	1	DCTN6	ID_5427	0	-0.56	-1.03	-1.36
	1	KIAA0251	ID_5438	0	-0.44	-1.04	-1.29
	1	TMEM39B	ID_5458	0	-1.18	-2.21	-2.5
	1	NNMT	ID_5462	0	-0.91	-4.72	-5.49
	1	C8ORF13	ID_5517	0	-1.01	-2.93	-3.88
	1	LIMS1	ID_5537	0	0.03	-0.54	-1.09
	1	TP53RK	ID_5561	0	-0.58	-1.1	-1.06
	1	MRPS35	ID_5573	0	-0.45	-0.97	-1.08
	1	TAPBP	ID_5600	0	-0.16	-0.86	-1.34
	1	PTGIR	ID_5602	0	-0.38	-1.75	-1.78
	1	ATOH8	ID_5608	0	-2	-2.54	-3.34
	1	FIS1	ID_5646	0	-0.64	-1.03	-1.32
	1	UBE2D3	ID_5648	0	-0.37	-1.14	-1.18
	1	CARD9	ID_5660	0	-0.94	-1.72	-1.68
	1	C8ORF33	ID_5676	0	-0.48	-0.94	-1.09
	1	NEDD4	ID_5686	0	-0.14	-1.48	-1.85
	1	UBE2E1	ID_5696	0	-0.23	-1.11	-1.79
	1	ARHGAP22	ID_5708	0	-1.45	-4.63	-4.85
	1	TP53I3	ID_5709	0	-0.61	-1.96	-2.45
	1	KIAA0232	ID_5712	0	-0.49	-0.68	-1.27
	1	ARHGAP24	ID_5729	0	-1.08	-3.05	-3.76
	1	JOSD3	ID_5737	0	-0.58	-1.19	-1.32
	1	SLC37A3	ID_5746	0	-0.27	-0.84	-1.02
	1	TMBIM4	ID_5764	0	-0.37	-1.04	-1.11
	1	TMBIM1	ID_5765	0	-0.14	-1.13	-2.03
	1	MGC87042	ID_5771	0	-0.53	-1.72	-2.34
	1	TRPC4AP	ID_5772	0	-0.28	-0.96	-1.37
	1	PTGS2	ID_5779	0	-1.63	-3.91	-3.98
	1	LTBP2	ID_5780	0	-0.27	-0.86	-1.27
	1	KIAA1279	ID_5864	0	-0.34	-0.79	-1.67
	1	SH3RF1	ID_5873	0	-0.59	-1.56	-1.71
	1	SMPDL3A	ID_5890	0	-0.64	-1.64	-2.97
	1	ARPC1B /// LOC653888	ID_5895	0	-0.18	-0.71	-1.3
	1	RRM1	ID_5914	0	-0.29	-1.17	-2.22
	1	GNB4	ID_5917	0	-0.72	-1.85	-2.19
	1	FHL2	ID_5935	0	-1.41	-1.59	-2.26
	1	GPR68	ID_5938	0	-1.64	-2.32	-2.56
	1	APBB1IP	ID_5940	0	-0.68	-2.44	-2.68
	1	NPDC1	ID_5943	0	-0.27	-0.5	-1.01
	1	NSMASE3 /// FLJ41352	ID_5944	0	-0.21	-0.85	-1.06
	1	MAWBP	ID_5963	0	-1.06	-2.75	-3.24
	1	MXRA8	ID_5965	0	-0.04	-1.08	-1.4
	1	CAPN2	ID_5967	0	-0.24	-0.71	-1.33
	1	MXRA5	ID_5971	0	-0.06	-0.79	-1.86
	1	CAPN1	ID_5974	0	-0.09	-0.77	-1.27
	1	C21ORF7	ID_5977	0	-0.45	-1.05	-1.56
	1	MND1	ID_6011	0	-1.02	-1.74	-4
	1	CDC42SE1	ID_6045	0	-0.47	-1.05	-1.12
	1	LOC150763	ID_6056	0	-0.2	-0.51	-1.09
	1	METTL1	ID_6060	0	-0.88	-1.52	-1.75
	1	B4GALT2	ID_6075	0	-0.5	-0.88	-1.31
	1	FLJ45482	ID_6088	0	0.14	-0.79	-1.4
	1	GPR30	ID_6091	0	-0.86	-1.3	-1.78
	1	METTL9	ID_6102	0	-0.35	-0.77	-1.01
	1	PRDX6	ID_6129	0	-0.29	-0.53	-1.01
	1	ZFAND2B	ID_6135	0	-0.86	-0.98	-1.28
	1	OXTR	ID_6154	0	-0.93	-4.95	-5.09
	1	MOCOS	ID_6177	0	-1.07	-2.28	-3.16
	1	PVR	ID_6180	0	-0.36	-1.41	-2.38
	1	S100A3	ID_6182	0	-1.1	-1.58	-1.92
	1	C6ORF153	ID_6218	0	-0.76	-1.5	-1.53
	1	NOPE	ID_6222	0	-0.42	-1.37	-1.75
	1	PXN	ID_6246	0	-0.59	-1.4	-1.31
	1	C6ORF115	ID_6260	0	-0.67	-2.13	-3.04
	1	SUSD1	ID_6296	0	-0.41	-1.15	-1.3
	1	SUSD2	ID_6299	0	-0.66	-0.7	-1.14
	1	FAM57A	ID_6301	0	-0.85	-3.35	-3.89
	1	KIAA0182	ID_6310	0	-0.12	-0.38	-1.01
	1	SLC27A3	ID_6330	0	-0.39	-1.31	-2.4
	1	C6ORF107	ID_6331	0	-0.53	-0.91	-1.28
	1	C6ORF108	ID_6332	0	-0.53	-0.95	-1.61
	1	BCAT1	ID_6337	0	-0.14	-1.05	-2.04
	1	FAM58A	ID_6369	0	-0.19	-0.32	-1.1
	1	MAPK12	ID_6374	0	-0.14	-0.97	-1.27
	1	MAPK13	ID_6377	0	-0.91	-1.7	-1.76
	1	PI4K2B	ID_6396	0	-0.68	-1.37	-2.28
	1	GLT8D2	ID_6401	0	-0.16	-0.46	-1.15
	1	LOC254057	ID_6415	0	-0.64	-1.18	-1.42
	1	SLC38A1	ID_6423	0	-0.17	-2.43	-3.09
	1	EWSR1	ID_6448	0	-0.12	-1.2	-1.79
	1	EIF4E2	ID_6453	0	-0.82	-1.08	-1.21
	1	NFATC2IP	ID_6464	0	0.12	-0.58	-1.05
	1	ACYP2	ID_6476	0	-0.76	-1.89	-2.76
	1	C6ORF189	ID_6487	0	-0.68	-1.7	-2.76
	1	KIAA1199	ID_6506	0	-0.33	-1.78	-4.49
	1	C3ORF64	ID_6535	0	-0.54	-1.97	-2.61
	1	CENPA	ID_6540	0	-1.15	-1.22	-3.77
	1	KRT7	ID_6542	0	-0.4	-1.95	-4.25
	1	GSTO1	ID_6553	0	-0.52	-1.47	-2.6
	1	C6ORF168	ID_6561	0	-0.94	-1.42	-1.54
	1	GMFB	ID_6581	0	-0.52	-1	-1.29
	1	PQBP1	ID_6616	0	-0.22	-0.72	-1.33
	1	ESPL1	ID_6633	0	-0.52	-1.77	-2.6
	1	ZNF521	ID_6703	0	-1.4	-2.17	-2.42
	1	C19ORF12	ID_6715	0	-1.42	-2.48	-2.73
	1	CASP1 /// COP1	ID_6716	0	-0.45	-2.13	-2.6
	1	PLCXD1	ID_6718	0	-0.73	-1.77	-1.72
	1	FGF5	ID_6724	0	-1.85	-4.82	-4.44
	1	C19ORF48	ID_6743	0	-0.65	-1.55	-2.04
	1	FGF1	ID_6747	0	-0.47	-1.9	-3.53
	1	CKAP2L	ID_6781	0	-0.73	-1.46	-5.16
	1	NCAPH2	ID_6788	0	-0.12	-0.39	-1.08
	1	DBF4	ID_6842	0	-0.4	-1.3	-3.89
	1	ZNF588	ID_6877	0	-0.61	-1.23	-1.59
	1	FGD1	ID_6882	0	-0.84	-2	-2.2
	1	NIPSNAP3A	ID_6932	0	-0.76	-2	-3.01
	1	C17ORF79	ID_6970	0	-0.3	-0.53	-1.62
	1	NOX4	ID_7004	0	-1.64	-4.46	-4.74
	1	MGC10850	ID_7023	0	-0.71	-1.91	-2.75
	1	FLJ31951	ID_7032	0	-0.46	-1.42	-1.79
	1	AURKA	ID_7043	0	-0.77	-2.06	-4.85
	1	AURKB	ID_7045	0	-0.87	-1.78	-5.75
	1	C1ORF107	ID_7055	0	-0.92	-1.4	-1.57
	1	RAN	ID_7069	0	-0.33	-1.26	-2.34
	1	PRDM4	ID_7082	0	-1.01	-1.32	-1.69
	1	C1ORF122	ID_7117	0	-0.66	-1.2	-1.26
	1	NCKAP1	ID_7118	0	-0.19	-0.76	-1.35
	1	PERLD1	ID_7142	0	-0.2	-0.9	-1.13
	1	ARL2BP	ID_7154	0	-0.67	-1.49	-1.74
	1	SLC24A3	ID_7161	0	-0.33	-1.86	-2.82
	1	GPX7	ID_7167	0	-1.14	-3.97	-4.69
	1	RBBP8	ID_7182	0	-0.67	-0.68	-1.13
	1	RAB11FIP5	ID_7186	0	-0.18	-0.65	-1
	1	DTYMK /// LOC653208	ID_7217	0	-0.8	-1.33	-2.54
	1	NPR2	ID_7224	0	-0.25	-1.09	-1.36
	1	NPR3	ID_7225	0	-0.38	-2.11	-3.24
	1	PKMYT1	ID_7241	0	-0.24	-1.27	-1.91
	1	C1ORF198	ID_7249	0	-0.14	-1	-1.4
	1	HNRPUL1	ID_7256	0	-0.38	-1	-1.52
	1	FAM86A	ID_7279	0	-0.51	-0.79	-1.26
	1	UBAP2L	ID_7294	0	-0.08	-0.91	-1.37
	1	UACA	ID_7301	0	-0.46	-1.46	-1.38
	1	TNRC6C	ID_7358	0	-0.07	-0.39	-1.14
	1	SLC39A7	ID_7370	0	0.08	-0.95	-1.17
	1	FLJ40869	ID_7379	0	-0.94	-1.37	-2.38
	1	FAM80B	ID_7396	0	-0.55	-0.57	-1.27
	1	HIST1H2BK	ID_7416	0	-0.41	-0.91	-1.09
	1	ZNF43	ID_7428	0	-0.63	-1.05	-1.44
	1	LOC133308	ID_7450	0	-0.67	-1.29	-2.66
	1	ZNF614	ID_7462	0	-0.73	-1.27	-1.67
	1	GPD2	ID_7500	0	-0.29	-1.42	-1.74
	1	ZNF629	ID_7514	0	-0.57	-1.52	-1.44
	1	ZNF678	ID_7541	0	-1.17	-0.91	-1.9
	1	MICAL1	ID_7555	0	-0.28	-1.29	-1.36
	1	GPATC4	ID_7591	0	-0.02	-0.67	-1.14
	1	ZNF25	ID_7629	0	-1.72	-2.23	-2.45
	1	LDOC1L	ID_7678	0	-1.14	-1.11	-1.59
	1	HSPB8	ID_7686	0	-0.52	-2.2	-2.32
	1	HSPB7	ID_7688	0	-0.65	-2.28	-3.67
	1	BAT2	ID_7694	0	-0.19	-0.6	-1.21
	1	ZNF697	ID_7703	0	-0.88	-0.76	-1.22
	1	RP11-311P8.3	ID_7722	0	-0.69	-0.88	-1.41
	1	FLJ38984	ID_7744	0	-0.92	-2.58	-2.74
	1	HSPA6	ID_7777	0	-1.14	-1.92	-2.06
	1	DCC1	ID_7790	0	-0.47	-0.69	-2.61
	1	FEZ2	ID_7797	0	-0.65	-1.12	-1.24
	1	PTPN21	ID_7811	0	-0.4	-1.07	-1.02
	1	SFRS6	ID_7818	0	-0.67	-1.24	-1.43
	1	SFRS7	ID_7819	0	-0.79	-1.62	-2.35
	1	HOMER3	ID_7823	0	-0.64	-2.7	-3.85
	1	EDG2 /// LOC644923	ID_7826	0	-0.4	-1.94	-2.28
	1	SFRS1	ID_7835	0	-0.3	-1.09	-1.5
	1	C6ORF1	ID_7837	0	-0.73	-1.11	-1.6
	1	LAMA4	ID_7889	0	-0.08	-0.57	-1.09
	1	KIAA0368	ID_7900	0	-0.56	-2.26	-2.83
	1	BAG2	ID_7913	0	-0.83	-2.52	-2.94
	1	NPAL2	ID_7920	0	-0.48	-2.12	-3.61
	1	FAM91A2 /// FLJ39739	ID_7921	0	-0.7	-2.72	-3.55
	1	FAM78B	ID_7976	0	-0.34	-1.14	-1.16
	1	JMJD3	ID_7978	0	-0.27	-0.47	-1.27
	1	UBQLN2	ID_7988	0	-0.66	-1.75	-2.02
	1	MLKL	ID_7997	0	-1.24	-3.78	-3.53
	1	TMLHE	ID_8036	0	-0.48	-2.3	-2.33
	1	ZNF85	ID_8041	0	-1.02	-1.13	-1.4
	1	MLPH	ID_8050	0	0.14	-1.24	-1.95
	1	ZNF93	ID_8068	0	-0.87	-1.26	-1.62
	1	RSN	ID_8069	0	-0.54	-1.5	-1.9
	1	NPAS2	ID_8094	0	-0.32	-1.46	-1.6
	1	DCTD	ID_8111	0	-0.73	-1.55	-1.57
	1	SYNCRIP	ID_8132	0	-0.22	-1	-1.38
	1	RAB27A	ID_8151	0	-0.13	-1.2	-1.77
	1	PTBP1	ID_8157	0	-0.51	-1	-1.67
	1	UNC84B	ID_8162	0	-0.09	-0.36	-1.09
	1	ZNF398	ID_8187	0	-0.8	-1.26	-1.39
	1	CUGBP2	ID_8193	0	-0.16	-0.79	-1.51
	1	ATP11C	ID_8198	0	-0.12	-0.96	-1.15
	1	ATP10A	ID_8216	0	-0.44	-2.43	-2.85
	1	IL4R	ID_8241	0	-1.31	-2.82	-3.12
	1	SLC22A4	ID_8243	0	-0.22	-1.43	-2.75
	1	MRPL9	ID_8266	0	-0.63	-1.26	-1.21
	1	KLHDC5	ID_8272	0	-0.8	-2.05	-2.03
	1	C10ORF119	ID_8294	0	-0.13	-0.76	-1.69
	1	ZNF367	ID_8296	0	-1.68	-2.9	-5.19
	1	IL7R	ID_8303	0	-1.07	-4.93	-7.76
	1	SORBS3	ID_8316	0	-0.58	-1.03	-1.31
	1	ABCA11	ID_8334	0	-1.13	-1.12	-1.45
	1	RAB22A	ID_8365	0	-0.69	-0.93	-1.38
	1	LRP5	ID_8379	0	-0.43	-1.27	-1.23
	1	RNF138	ID_8431	0	-0.43	-1.14	-1.59
	1	SMARCA1	ID_8433	0	-0.11	-0.89	-1.02
	1	LRAP	ID_8437	0	-0.24	-0.74	-1.78
	1	RNF169	ID_8463	0	-1.33	-1.55	-2.14
	1	NRF1	ID_8480	0	-0.71	-0.62	-1.14
	1	SMARCC1	ID_8487	0	-0.06	-0.67	-1.42
	1	GABBR2	ID_8508	0	-0.28	-0.84	-1.68
	1	TMED5	ID_8546	0	-0.35	-0.78	-1.06
	1	TMED1	ID_8552	0	-0.64	-1.63	-2.31
	1	EHD3	ID_8558	0	-0.14	-0.9	-1.94
	1	ITGB4BP	ID_8588	0	-0.27	-0.58	-1.32
	1	APOLD1	ID_8601	0	-0.64	-1.04	-1.47
	1	IKIP	ID_8678	0	-0.1	-1.04	-2.1
	1	CD58	ID_8681	0	-0.41	-1.04	-1.4
	1	NRP1	ID_8692	0	-0.44	-4.01	-4.43
	1	GJA7	ID_8694	0	-0.58	-1.43	-1.49
	1	GJA5	ID_8702	0	-0.8	-3.19	-3.48
	1	PTER	ID_8707	0	-0.82	-0.85	-1.15
	1	CCNJ	ID_8715	0	-0.76	-1.11	-1.22
	1	CTBP2	ID_8716	0	-0.53	-1.76	-1.59
	1	RAD51	ID_8724	0	-0.69	-2.3	-4.94
	1	TCAG7.981	ID_8743	0	-0.39	-0.72	-1.06
	1	SAMD9L	ID_8747	0	0.19	-2.35	-3.6
	1	POPDC3	ID_8760	0	-0.82	-2.82	-2.63
	1	KIAA1729	ID_8799	0	-0.58	-0.61	-1.06
	1	PYCR1	ID_8807	0	-0.41	-0.7	-1.22
	1	RIOK2	ID_8829	0	-0.04	-1	-2.63
	1	DDR2	ID_8856	0	-0.07	-1.33	-1.98
	1	MRPS2	ID_8877	0	-0.51	-1.05	-1.4
	1	NRIP1	ID_8879	0	-1.02	-1.87	-2.15
	1	TRIB3	ID_8900	0	-2.35	-3.7	-3.76
	1	TYMS	ID_8903	0	-0.45	-1.7	-4.28
	1	FLI1	ID_8937	0	-1.7	-3.31	-3.38
	1	YARS	ID_8950	0	-0.42	-1.1	-1.56
	1	FLII	ID_8962	0	-0.28	-0.86	-1.55
	1	FBXL10	ID_9016	0	-0.86	-1.25	-1.55
	1	DLEU2	ID_9030	0	-0.79	-1.65	-2.82
	1	FMNL3	ID_9052	0	-0.73	-0.84	-1.31
	1	EXOSC8	ID_9054	0	-0.64	-0.97	-1.32
	1	EXOSC6	ID_9056	0	-1.14	-1.51	-2.16
	1	ZNF469	ID_9090	0	-0.63	-2.15	-2.49
	1	EGFR	ID_9152	0	-0.18	-1.36	-1.51
	1	ZNF430	ID_9176	0	-0.21	-0.57	-1.15
	1	TNFRSF12A	ID_9179	0	-1.69	-3.58	-3.94
	1	MRAS	ID_9182	0	-0.06	-0.75	-1.42
	1	SESN2	ID_9187	0	-0.4	-0.73	-1.28
	1	ZNF428	ID_9194	0	-0.34	-0.68	-1.08
	1	DEDD	ID_9221	0	-0.54	-0.95	-1.18
	1	DICER1	ID_9223	0	-0.3	-0.79	-1.01
	1	ZNF403	ID_9227	0	-0.59	-0.93	-1.21
	1	CDK5RAP2	ID_9233	0	-0.36	-0.77	-1.29
	1	YAP1	ID_9236	0	-0.51	-2.29	-3.12
	1	C15ORF20	ID_9242	0	-0.34	-0.49	-1.5
	1	FLJ39822	ID_9252	0	-0.4	-2.82	-4.35
	1	CDK4	ID_9255	0	-0.44	-0.88	-1.4
	1	C15ORF17	ID_9267	0	-1.18	-1.81	-1.93
	1	SLC12A4	ID_9301	0	-0.29	-1.11	-1.31
	1	LOC645619	ID_9304	0	-1	-1.89	-2.46
	1	RDH10	ID_9311	0	-0.69	-2.15	-2.48
	1	H2AFY2	ID_9312	0	-0.39	-0.96	-1.37
	1	HNMT	ID_9377	0	-0.8	-1.92	-2.84
	1	CXORF26	ID_9395	0	-2.05	-4.87	-4.96
	1	CDT1	ID_9412	0	-0.7	-1.94	-4.73
	1	TNFRSF11B	ID_9415	0	-1.09	-5.94	-7.33
	1	NT5E	ID_9422	0	-0.05	-0.97	-2.27
	1	LTBR	ID_9424	0	-0.61	-1.88	-2.43
	1	TRHDE	ID_9454	0	-0.09	-1.04	-2.69
	1	ILF3	ID_9459	0	-0.38	-0.6	-1.28
	1	DERA	ID_9488	0	-0.56	-1.51	-2.21
	1	RP11-93B10.1	ID_9492	0	-0.81	-1.83	-2.31
	1	FUT11	ID_9493	0	-0.36	-1.01	-1.26
	1	RIPK5	ID_9507	0	-0.3	-1.14	-1.23
	1	LOC255130	ID_9510	0	0.02	-1.15	-2.43
	1	KIAA1609	ID_9522	0	-0.47	-0.81	-1.13
	1	CXORF34	ID_9556	0	-0.62	-1.23	-1.56
	1	MUS81	ID_9592	0	-0.79	-1.33	-1.39
	1	ISOC2	ID_9603	0	-0.83	-1.12	-1.73
	1	GLTP	ID_9643	0	-0.29	-0.62	-1.03
	1	CHCHD5	ID_9676	0	-0.74	-1.06	-1.14
	1	CHCHD4	ID_9678	0	-0.78	-1.17	-1.41
	1	BCL2L1	ID_9679	0	-1.23	-2.14	-2.23
	1	RCCD1	ID_9691	0	-0.67	-1.05	-1.28
	1	OBSL1	ID_9696	0	-0.55	-2.1	-2.4
	1	NTF3	ID_9701	0	0.15	-0.72	-1.3
	1	EMILIN2	ID_9706	0	-0.11	-0.65	-1.14
	1	EMILIN1	ID_9708	0	-0.18	-0.77	-1.41
	1	TMEM117	ID_9712	0	-0.26	-2.7	-4.14
	1	MAB21L1	ID_9723	0	-3.19	-4.43	-4.99
	1	SLC20A1	ID_9729	0	-0.19	-2.31	-2.29
	1	LXN	ID_9730	0	0.07	-1.18	-2.55
	1	LYN	ID_9754	0	-0.08	-1.07	-1.82
	1	ZNF142	ID_9760	0	-0.67	-0.72	-1.04
	1	INHBE	ID_9772	0	-1.03	-2.28	-2.8
	1	C19ORF2	ID_9779	0	-0.22	-0.82	-1.19
	1	IMP4	ID_9836	0	-0.37	-0.81	-1.19
	1	MGP	ID_9839	0	-0.59	-0.95	-1.34
	1	SLC35F3	ID_9853	0	-0.35	-1.19	-1.14
	1	NTN4	ID_9865	0	-0.2	-1.01	-1.18
	1	AMMECR1	ID_9886	0	-0.08	-1.52	-1.77
	1	CASP4	ID_9896	0	-0.71	-3.36	-3.63
	1	SLC35D1	ID_9899	0	-0.43	-1.33	-1.4
	1	CASP8	ID_9903	0	-0.79	-1.19	-2.32
	1	CASP1	ID_9906	0	-0.64	-2.45	-3.34
	1	SLC43A1	ID_9908	0	-0.16	-1.04	-1.04
	1	SLC43A3	ID_9911	0	-0.13	-2.25	-2.29
	1	FLJ14213	ID_9920	0	-1.59	-2.48	-2.61
	1	SLC35C1	ID_9951	0	-0.8	-1.5	-1.45
	1	TMEM18	ID_9957	0	-0.84	-2.21	-2.52
	1	NOD27	ID_10005	0	-0.31	-2.21	-2.53
	1	RHBDF1	ID_10062	0	-0.14	-1.32	-1.69
	1	PLA2G4C	ID_10073	0	-0.54	-1.76	-1.64
	1	RAB6A	ID_10105	0	-0.24	-0.94	-1.3
	1	LPXN	ID_10157	0	-0.71	-3.25	-3.05
	1	CAP2	ID_10169	0	-0.48	-1.99	-2.89
	1	C7ORF10	ID_10176	0	-0.32	-0.88	-1.16
	1	RAB32	ID_10178	0	-0.52	-1.15	-1.42
	1	RAB34	ID_10189	0	-0.38	-0.99	-1.22
	1	PAPPA	ID_10216	0	-0.91	-4.26	-5.37
	1	DKFZP667E0512	ID_10217	0	-0.8	-1.12	-2.25
	1	TMEM98	ID_10221	0	-0.35	-0.91	-1.7
	1	ZNF180	ID_10223	0	-0.89	-0.83	-1.34
	1	2014-09-08	ID_10253	0	-0.53	-1.49	-1.54
	1	CAV1	ID_10265	0	-0.13	-1.04	-1.56
	1	MICAL-L1	ID_10273	0	-1.24	-2.55	-3.53
	1	LOC283439	ID_10274	0	0.27	-1.26	-1.51
	1	TMEM77	ID_10284	0	-0.17	-1.03	-1.28
	1	DKFZP564J0863	ID_10304	0	-0.43	-1.26	-1.67
	1	TMEM62	ID_10321	0	-0.71	-1.49	-2.54
	1	TMEM16F	ID_10342	0	-0.07	-0.75	-1.3
	1	FLJ42709	ID_10347	0	-0.72	-2.01	-2.73
	1	KRTCAP2	ID_10352	0	-0.39	-0.94	-1.7
	1	LOC644112	ID_10367	0	-0.89	-2.07	-4.55
	1	TMEM158	ID_10370	0	-0.34	-1.49	-2.35
	1	TMEM154	ID_10382	0	-0.44	-1.65	-3.26
	1	TMEM166	ID_10402	0	-1.82	-6.16	-6.17
	1	TMEM49	ID_10412	0	-0.48	-1.66	-2.22
	1	TMEM44	ID_10425	0	-1.42	-2.98	-2.85
	1	FSTL3	ID_10442	0	-0.55	-2.05	-1.99
	1	C20ORF116	ID_10467	0	-0.42	-0.95	-1.54
	1	CRYAB	ID_10473	0	-0.5	-1.6	-2.99
	1	RXRA	ID_10475	0	-0.16	-0.77	-1.19
	1	LOC653105	ID_10550	0	-0.67	-0.95	-1.51
	1	ANGPT1	ID_10558	0	-0.19	-1.19	-2.24
	1	STX4	ID_10572	0	-0.46	-1.38	-1.62
	1	ZNF275	ID_10596	0	0.09	-1.31	-2.28
	1	MFSD5	ID_10605	0	-0.26	-1.69	-2.23
	1	HAPLN1	ID_10630	0	-0.23	-1.59	-2.62
	1	C20ORF134	ID_10643	0	-0.72	-0.94	-1.05
	1	CMTM7	ID_10662	0	-0.37	-1.31	-1.77
	1	CBFB	ID_10692	0	-0.46	-1.54	-2.31
	1	FLJ14154	ID_10711	0	-0.86	-1.39	-1.4
	1	C14ORF151	ID_10744	0	-0.58	-0.6	-1.57
	1	TRIP6	ID_10753	0	-0.6	-2.21	-2.53
	1	NBN	ID_10756	0	-0.8	-1.53	-1.74
	1	TRIM8	ID_10772	0	-1.06	-3.76	-3.72
	1	GALNT3	ID_10804	0	-0.59	-2.94	-3.52
	1	HYLS1	ID_10808	0	-1.9	-2.97	-4.61
	1	GALNT5	ID_10812	0	-0.06	-0.72	-1.8
	1	C1QTNF5	ID_10820	0	-0.81	-1.34	-1.93
	1	C13ORF34	ID_10845	0	-0.16	-0.85	-2.04
	1	NOG	ID_10852	0	-1.35	-3.26	-3.39
	1	EIF2C2	ID_10853	0	-0.41	-2.3	-2.3
	1	NOV	ID_10857	0	-0.28	-1.39	-2.14
	1	NNT	ID_10873	0	-0.16	-0.46	-1.11
	1	C14ORF106	ID_10876	0	-0.59	-1.34	-2.54
	1	EIF2C4	ID_10882	0	-1.87	-2.68	-3.16
	1	ITGA11	ID_10889	0	-0.16	-0.67	-1.08
	1	MTP18	ID_10891	0	-1.01	-1.21	-1.44
	1	CDGAP	ID_10893	0	-0.84	-3.63	-3.61
	1	SLC36A4	ID_10925	0	-0.48	-1.1	-1.13
	1	C14ORF135	ID_10933	0	-0.33	-0.94	-1.5
	1	KCNMA1	ID_10951	0	-0.11	-0.74	-1.69
	1	MDS032	ID_10961	0	-0.61	-1.43	-1.79
	1	NMI	ID_10978	0	-0.89	-2.83	-3.01
	1	DIMT1L	ID_10981	0	-0.43	-0.87	-1.15
	1	PAQR7	ID_11053	0	-0.59	-1.07	-2.02
	1	C20ORF172	ID_11062	0	-0.86	-0.74	-1.6
	1	MORF4L1 /// MORF4	ID_11064	0	-0.36	-0.94	-1.07
	1	MPP4	ID_11117	0	0	-1.16	-1.46
	1	NRK	ID_11135	0	-0.62	-0.87	-1.14
	1	APEX1	ID_11157	0	-0.15	-0.71	-1.52
	1	PPP1CA	ID_11200	0	-0.34	-0.63	-1.42
	1	ADSS	ID_11206	0	-0.24	-0.96	-1.02
	1	FLJ20035	ID_11215	0	-0.73	-2.46	-2.5
	1	LASP1	ID_11224	0	0.01	-0.75	-1.58
	1	TICAM2	ID_11239	0	-0.72	-1.51	-1.6
	1	ARMCX1	ID_11277	0	-0.68	-1.52	-1.8
	1	JDP2	ID_11289	0	-0.36	-1.1	-1.48
	1	FAM38A	ID_11311	0	-0.17	-0.78	-1.73
	1	LRRK1	ID_11313	0	-0.53	-1.17	-1.5
	1	IFITM1	ID_11316	0	-0.24	-0.63	-1.44
	1	IFITM2	ID_11317	0	-0.36	-0.66	-1.06
	1	PAX3	ID_11360	0	-0.62	-1.09	-1.23
	1	PAX8	ID_11374	0	-0.65	-1.61	-2.72
	1	ADFP	ID_11379	0	0.1	-1.37	-1.73
	1	ADI1	ID_11403	0	-0.47	-0.93	-1.46
	1	CCBE1	ID_11412	0	-0.43	-2	-2.01
	1	ABCB10	ID_11413	0	-0.3	-1.67	-2.82
	1	BAZ1A	ID_11433	0	-0.28	-0.82	-1.45
	1	BAZ1B	ID_11434	0	-0.62	-1.01	-1.48
	1	PIAS3	ID_11436	0	-0.46	-1.11	-1.25
	1	SASH1	ID_11471	0	-0.31	-1.29	-1.98
	1	FAM111B	ID_11473	0	-1.24	-1.51	-1.71
	1	FAM111A	ID_11474	0	-0.81	-2.19	-2.92
	1	C10ORF86	ID_11486	0	-0.66	-0.84	-1.35
	1	RABEP2	ID_11488	0	-1.07	-1.79	-1.99
	1	CPEB1	ID_11503	0	-0.39	-0.76	-1.02
	1	FAM35A	ID_11522	0	-1.27	-1.16	-1.53
	1	FAM113A	ID_11524	0	-0.67	-1.12	-1.13
	1	ZFP36L2	ID_11543	0	-0.33	-1.99	-1.97
	1	XBP1	ID_11546	0	-2.91	-3.52	-4.31
	1	MSRB3	ID_11567	0	-0.36	-0.97	-1.22
	1	SLC16A5	ID_11572	0	-0.54	-1.18	-1.47
	1	SLC16A6	ID_11579	0	-1.66	-2.78	-2.79
	1	GFPT1	ID_11580	0	-0.01	-0.42	-1.01
	1	SLC25A24	ID_11609	0	-0.37	-1.53	-1.5
	1	SLC25A38	ID_11641	0	-0.53	-0.94	-1.31
	1	EMP2	ID_11647	0	-0.01	-0.84	-1.34
	1	EMP1	ID_11648	0	-0.2	-2.94	-3.86
	1	EEF1B2	ID_11652	0	-0.37	-0.81	-1.4
	1	SLC25A13	ID_11683	0	-0.46	-1.67	-2.68
	1	SLC25A15	ID_11697	0	-0.7	-1.24	-1.36
	1	AEBP1	ID_11704	0	-0.21	-0.69	-1.08
	1	TNIP2	ID_11712	0	-0.22	-0.35	-1.21
	1	FLJ20054	ID_11748	0	-1.16	-2.89	-2.76
	1	TUBGCP5	ID_11755	0	-0.97	-0.77	-1.24
	1	SULF1	ID_11775	0	-0.19	-1.11	-2.36
	1	DDAH1	ID_11792	0	-0.32	-1.19	-1.71
	1	LOC283677	ID_11793	0	-0.44	-1.04	-1.1
	1	CTSLL3	ID_11798	0	-0.19	-1.08	-1.61
	1	FCHSD2	ID_11802	0	-0.57	-1.6	-1.74
	1	TM6SF1	ID_11809	0	-1.24	-1.72	-2.29
	1	SPHK1	ID_11836	0	-1.27	-4.96	-5.89
	1	LSM14A	ID_11855	0	-0.52	-0.99	-1.25
	1	NUBP1	ID_11857	0	-1.05	-2.06	-2.3
	1	LOC440309 /// LOC649	ID_11868	0	-1.13	-1.78	-1.83
	1	NAGPA	ID_11880	0	-0.21	-0.77	-1.17
	1	MFAP2	ID_11926	0	-0.52	-2.08	-3.44
	1	MFAP4	ID_11928	0	-0.36	-0.95	-1.22
	1	XDH	ID_11931	0	-1.31	-2.68	-2.7
	1	VAV2	ID_11960	0	-0.64	-1.46	-2.01
	1	ATAD3B /// LOC654161	ID_11967	0	-0.01	-0.61	-1.1
	1	VASP	ID_11986	0	0.18	-0.6	-1.03
	1	SASS6	ID_11990	0	-0.54	-0.74	-1.01
	1	HS3ST3A1	ID_12031	0	-0.72	-1.74	-1.57
	1	TSPAN14	ID_12033	0	-0.11	-1.22	-1.93
	1	FAM40A	ID_12072	0	-0.62	-0.68	-1.02
	1	GYPC	ID_12131	0	-0.67	-1.71	-2.75
	1	NFKB1	ID_12142	0	-1.35	-3.21	-3.06
	1	SUMO3	ID_12178	0	-0.63	-1.3	-2
	1	FNDC6	ID_12184	0	-0.15	-0.94	-1.01
	1	ITPR3	ID_12200	0	-0.2	-0.77	-1.16
	1	NRBP1	ID_12219	0	-0.44	-1.34	-1.89
	1	CEP170 /// CEP170L	ID_12229	0	-1.31	-1.55	-1.81
	1	UBIAD1	ID_12243	0	-0.31	-0.86	-1.15
	1	REEP5	ID_12298	0	-0.18	-0.68	-1.32
	1	DIO2	ID_12301	0	-1.21	-2.4	-2.71
	1	KPNB1	ID_12319	0	-0.36	-1.33	-1.69
	1	APOBEC3G /// APOBEC3	ID_12322	0	-1.15	-1.94	-2.13
	1	SMTN	ID_12325	0	-0.25	-1.35	-2.06
	1	SCARF2	ID_12337	0	-0.28	-1.21	-2.37
	1	ENO1	ID_12349	0	-0.15	-0.41	-1.29
	1	PWCR1	ID_12350	0	-0.32	-0.43	-1.1
	1	LOC151146	ID_12354	0	-0.52	-0.92	-1.2
	1	ZWINT	ID_12381	0	-0.45	-1.35	-4.54
	1	CRTC3	ID_12383	0	-1.11	-1.53	-2.06
	1	PDCL3 /// LOC285359	ID_12385	0	-0.76	-1.52	-1.52
	1	SFRS10	ID_12395	0	-0.21	-0.4	-1.17
	1	SFRS12	ID_12399	0	-1.31	-2.04	-2.34
	1	ELF4	ID_12421	0	-1.09	-2.27	-2.61
	1	TMCO4	ID_12467	0	-1.18	-2.81	-2.83
	1	CBX3 /// LOC653972	ID_12471	0	-0.47	-0.84	-1.02
	1	NHLRC2	ID_12473	0	-0.62	-0.79	-1.17
	1	PPP3CC	ID_12481	0	-0.62	-1.17	-1.17
	1	ZXDB	ID_12521	0	-1.45	-1.47	-1.87
	1	LMO7	ID_12522	0	-0.31	-1.79	-2.42
	1	STMN2	ID_12535	0	-0.26	-0.44	-1.49
	1	VAMP5	ID_12548	0	-0.69	-1.31	-1.64
	1	ORAOV1	ID_12563	0	-0.1	-0.64	-1.06
	1	PPIL5	ID_12576	0	-0.46	-1.23	-2.95
	1	DHRSX	ID_12592	0	-0.39	-1.94	-4.25
	1	TMEM142C	ID_12600	0	-0.88	-1.87	-2.54
	1	DKC1	ID_12602	0	-0.54	-1.03	-1.88
	1	IFI16	ID_12612	0	-0.65	-2.67	-3.24
	1	DHRS3	ID_12617	0	-0.41	-2.6	-2.92
	1	DHRS4	ID_12619	0	-0.46	-1.36	-2.31
	1	FLJ44342	ID_12622	0	-1.05	-2.54	-2.83
	1	GRAMD3	ID_12625	0	-0.68	-1.48	-1.43
	1	IFI44	ID_12660	0	-1.2	-2.66	-2.48
	1	TPM3 /// TPM4	ID_12661	0	-0.36	-0.85	-2.15
	1	BDKRB2	ID_12675	0	-0.46	-1.65	-1.92
	1	IFI35	ID_12676	0	-0.73	-1.52	-1.79
	1	ASPSCR1	ID_12679	0	-0.33	-1.54	-1.69
	1	IFI27	ID_12689	0	-0.69	-0.7	-1.24
	1	RIT1	ID_12691	0	-0.91	-1.18	-1.55
	1	DNAPTP6	ID_12696	0	-0.3	-1.56	-2.34
	1	VBP1	ID_12699	0	-0.46	-0.96	-1.09
	1	AGPAT2	ID_12712	0	-0.36	-1.07	-1.57
	1	RIN2	ID_12723	0	-2.23	-4.39	-4.62
	1	RIN3	ID_12731	0	-1.23	-2	-2.1
	1	NACA /// NACAP1 ///	ID_12752	0	-1.31	-1.26	-1.64
	1	PGBD2	ID_12755	0	-1.08	-1.26	-1.51
	1	PPP2R4	ID_12781	0	-0.2	-0.85	-1.18
	1	TSPO	ID_12782	0	-0.59	-0.91	-1.45
	1	SNX9	ID_12805	0	-0.59	-2.69	-2.9
	1	ZC3H5	ID_12806	0	-0.58	-1.42	-1.58
	1	SNX5	ID_12810	0	-0.29	-1.33	-1.97
	1	FOLR3	ID_12825	0	-0.86	-1.67	-3
	1	UBE1L	ID_12857	0	-0.55	-1	-1.16
	1	KLHL22	ID_12860	0	-0.66	-0.88	-1.93
	1	ZYX	ID_12864	0	-0.48	-1.21	-1.99
	1	IRAK1	ID_12870	0	-0.69	-1.34	-2.65
	1	UBE2Z	ID_12909	0	-0.84	-1.55	-2.04
	1	TEX264	ID_12918	0	-0.42	-1.04	-1.02
	1	KCNK6	ID_12952	0	-0.14	-0.94	-1.92
	1	TTC7B	ID_12961	0	-0.19	-1.23	-1.63
	1	ORC1L	ID_12962	0	-0.07	-1.01	-2.26
	1	MSX1	ID_12965	0	-0.16	-0.87	-1.8
	1	KCNK2	ID_12988	0	-1.2	-3.74	-4.33
	1	SYNE1	ID_12994	0	-0.63	-1.62	-1.48
	1	FNBP4	ID_13000	0	-0.77	-1.64	-1.68
	1	RWDD3	ID_13007	0	-0.72	-1.02	-1.2
	1	TTC27	ID_13020	0	-0.47	-1.28	-1.32
	1	MSRA	ID_13024	0	-0.27	-0.79	-1.27
	1	SYNJ2	ID_13027	0	-0.36	-1.18	-1.43
	1	FBLIM1	ID_13051	0	-0.54	-2.1	-3.22
	1	LOC493869	ID_13052	0	-0.28	-0.88	-1.48
	1	HSD3B7	ID_13075	0	-0.71	-2.1	-2.94
	1	ZBTB8	ID_13078	0	-1.06	-2.07	-2.19
	1	TTC15	ID_13107	0	-0.35	-0.88	-1.05
	1	2014-03-04	ID_13117	0	-0.84	-2.2	-2.53
	1	FLJ31033	ID_13135	0	-0.69	-2.89	-3.34
	1	KCNC4	ID_13137	0	-0.48	-1.33	-1.7
	1	ELOVL6	ID_13161	0	0	-1.03	-2.09
	1	WEE1	ID_13185	0	-1.39	-2.49	-3.41
	1	LOC493856	ID_13205	0	-0.5	-1.09	-1.23
	1	ZFR	ID_13252	0	-0.46	-1.06	-1.34
	1	SYNC1	ID_13253	0	-1.39	-3.05	-3.18
	1	CDK2AP1	ID_13259	0	-0.41	-0.93	-1.82
	1	JAM2	ID_13262	0	-0.66	-0.96	-1.33
	1	CHFR	ID_13263	0	-0.81	-1.53	-1.97
	1	AP1M1	ID_13267	0	-0.34	-0.72	-1.05
	1	CHD3	ID_13288	0	-0.34	-0.92	-1.1
	1	FAM26B	ID_13292	0	-2.97	-5.4	-5.56
	1	FAM20C	ID_13314	0	-0.2	-1.91	-2.67
	1	FER1L3	ID_13331	0	-0.23	-1.28	-2.81
	1	PRKX /// PRKY	ID_13341	0	-0.73	-1.73	-1.96
	1	FAM101B	ID_13357	0	-0.24	-0.68	-1.1
	1	EDNRA	ID_13368	0	0.41	-1.95	-3.57
	1	VEPH1	ID_13369	0	-0.49	-3.65	-4.94
	1	FAM100B	ID_13376	0	-0.45	-1.05	-1.41
	1	SH3KBP1	ID_13391	0	-0.25	-0.78	-1.4
	1	SPEG	ID_13400	0	-0.23	-0.83	-1.06
	1	AFF3	ID_13414	0	-0.01	-0.65	-1.11
	1	LOC146909	ID_13428	0	-0.89	-1.65	-6.01
	1	SCUBE3	ID_13437	0	-0.25	-1.78	-4.34
	1	LOC162073	ID_13451	0	-0.73	-3.07	-4.01
	1	WNT5B	ID_13459	0	-0.53	-3.38	-4.77
	1	ELK3	ID_13471	0	-0.61	-1.73	-1.67
	1	LASS2	ID_13505	0	-0.33	-1.92	-2.73
	1	WDR4	ID_13507	0	-0.78	-1.21	-2.1
	1	KCNQ5	ID_13516	0	-1.54	-2.77	-2.89
	1	PCGF6	ID_13523	0	-0.82	-1.38	-2.16
	1	LOC283824	ID_13530	0	-0.19	-1.34	-1.99
	1	GM632	ID_13531	0	-0.5	-0.94	-1.38
	1	TIMM44	ID_13532	0	-0.63	-0.8	-1.18
	1	SETD6	ID_13578	0	-0.79	-1.17	-1.32
	1	SETD7	ID_13579	0	-0.67	-1.85	-2.39
	1	SETD8	ID_13580	0	-0.08	-0.46	-1.23
	1	SIPA1L1	ID_13616	0	-0.71	-1.85	-2.24
	1	CAMK2N1	ID_13648	0	-0.54	-1.08	-1.54
	1	GNPNAT1	ID_13660	0	-0.29	-0.86	-1.55
	1	CDR2L	ID_13666	0	-0.65	-0.97	-1.3
	1	MMP16	ID_13686	0	0	-0.82	-1.21
	1	MMP14	ID_13689	0	-0.31	-2.01	-2.72
	1	RFTN1	ID_13690	0	-0.16	-1.57	-3.1
	1	MMP11	ID_13696	0	-0.51	-0.96	-1.22
	1	NUCKS1	ID_13720	0	-0.36	-0.98	-1.61
	1	PHF11	ID_13728	0	-1.27	-4.22	-5.35
	1	PHF19	ID_13736	0	-1.09	-2.27	-3.56
	1	CSNK1D	ID_13740	0	-0.8	-1.27	-1.55
	1	SNRPD1	ID_13756	0	-0.5	-0.97	-1.46
	1	TGFB1	ID_13758	0	0.06	-0.58	-1.24
	1	FNTB	ID_13760	0	-0.8	-1.52	-1.74
	1	TFDP1	ID_13789	0	-0.59	-1.12	-1.52
	1	ZRF1	ID_13808	0	-0.24	-0.7	-1.12
	1	TIMM13	ID_13839	0	-0.42	-0.79	-1.01
	1	FLJ43489	ID_13843	0	-1	-1.17	-1.6
	1	TETRAN	ID_13847	0	-0.26	-0.78	-1.27
	1	TK2	ID_13892	0	-0.84	-1.54	-1.66
	1	DLX2	ID_13910	0	-0.89	-1.17	-2.34
	1	DKFZP434H1419	ID_13931	0	-0.13	-0.39	-1.3
	1	UROD	ID_13944	0	-0.22	-0.72	-1.46
	1	THG1L	ID_13949	0	-1.05	-1.41	-1.89
	1	GRIA3	ID_13957	0	-0.25	-1.45	-2.46
	1	SNAI2	ID_13959	0	-0.36	-0.92	-1.51
	1	GRIA1	ID_13963	0	0.08	-1.06	-1.83
	1	KRT81	ID_13979	0	-0.34	-0.47	-1.13
	1	TMEM63A	ID_14005	0	-0.19	-0.76	-1.18
	1	C5ORF28	ID_14046	0	-0.64	-1.15	-1.2
	1	C5ORF23	ID_14049	0	-0.45	-1.98	-3.13
	1	C5ORF14	ID_14068	0	-0.27	-0.98	-1.75
	1	POU2F2	ID_14093	0	0.22	-1.23	-1.41
	1	RAD51AP1	ID_14104	0	-0.55	-1.73	-5.08
	1	KIFC1	ID_14124	0	-0.22	-1.3	-3.49
	1	C9ORF40	ID_14142	0	-1.21	-1.48	-1.83
	1	C9ORF38	ID_14148	0	-0.65	-1.03	-1.08
	1	TMEM132B	ID_14152	0	-0.64	-0.5	-1.04
	1	SURF5	ID_14166	0	-0.28	-0.49	-1.06
	1	ESM1	ID_14185	0	-0.8	-4.04	-5.87
	1	C9ORF21	ID_14191	0	-0.96	-1.19	-1.5
	1	ARHGAP11A	ID_14240	0	-0.64	-1.34	-2.04
	1	ACTA2	ID_14243	0	-0.35	-0.51	-1.12
	1	KIRREL	ID_14263	0	-0.02	-1.8	-2.87
	1	TBC1D2	ID_14271	0	-0.74	-1.85	-1.76
	1	DNM3	ID_14272	0	-2.03	-2.79	-3.65
	1	FLJ21986	ID_14273	0	-0.13	-1.02	-2.34
	1	ACTC1	ID_14274	0	-0.94	-1.34	-1.71
	1	ZFHX1B	ID_14323	0	-0.79	-2.29	-2.45
	1	TEK	ID_14329	0	-0.42	-0.95	-1.31
	1	WHSC1	ID_14350	0	-1.02	-1.7	-2.97
	1	TOR1A	ID_14397	0	-0.2	-1.95	-3.62
	1	TCIRG1	ID_14404	0	-0.12	-1.33	-2.06
	1	PDLIM7	ID_14420	0	-0.44	-1.29	-1.95
	1	PDLIM2	ID_14424	0	-0.62	-1.49	-2.28
	1	SERINC2	ID_14473	0	-0.4	-0.69	-1.33
	1	ACTR3	ID_14499	0	-0.16	-0.92	-1.35
	1	ADAM19	ID_14528	0	-0.04	-1.14	-2.04
	1	ADAM12	ID_14529	0	-0.09	-1.19	-2.63
	1	USP3	ID_14538	0	-0.27	-0.79	-1.23
	1	USP5	ID_14541	0	-0.33	-0.74	-1.61
	1	LANCL2	ID_14552	0	-0.92	-3	-2.74
	1	CEP135	ID_14560	0	-0.9	-1.18	-2.62
	1	CRABP2	ID_14567	0	0	-0.67	-1.58
	1	SRM	ID_14610	0	-0.55	-0.97	-1.52
	1	ST5	ID_14658	0	-0.17	-1.72	-2.19
	1	ST7	ID_14663	0	-0.34	-1.61	-2.32
	1	PRRX1	ID_14673	0	-1.38	-5.9	-7.98
	1	PRRX2	ID_14676	0	-0.46	-1.74	-1.95
	1	TM9SF1	ID_14692	0	-0.11	-0.49	-1.01
	1	C9ORF88	ID_14705	0	-0.21	-1	-1.45
	1	C9ORF125	ID_14706	0	-0.76	-1.69	-1.74
	1	TNFRSF1A	ID_14739	0	-0.05	-1.03	-1.05
	1	MARVELD1	ID_14741	0	-0.57	-1.66	-3.02
	1	MYPN	ID_14785	0	-1.5	-3.1	-2.89
	1	LIG1	ID_14814	0	-0.32	-0.65	-2.45
	1	MED12	ID_14820	0	-0.48	-1.18	-1.42
	1	MED10	ID_14830	0	-0.65	-1.3	-1.32
	1	SFRS1 /// INTS8	ID_14838	0	-0.29	-1.05	-1.48
	1	MGC3032	ID_14851	0	-0.39	-1.36	-1.44
	1	IL13RA2	ID_14871	0	-0.32	-1.01	-1.56
	1	TP53	ID_14874	0	-0.39	-1.85	-1.87
	1	SS18	ID_14878	0	-0.6	-1.32	-1.37
	1	DEGS1	ID_14890	0	-0.06	-0.53	-1.22
	1	CMPK	ID_14892	0	-0.57	-1.44	-2.58
	1	ZMYND11	ID_14893	0	-0.63	-2.2	-2.38
	1	MPDU1	ID_14905	0	-0.39	-1.45	-3.8
	1	PHLDA3	ID_14907	0	-0.83	-1.88	-1.72
	1	PHLDA2	ID_14908	0	-0.25	-0.98	-2.11
	1	TFAP2C	ID_14943	0	-0.68	-0.85	-1
	1	COMMD10	ID_14948	0	-0.57	-0.99	-1.58
	1	TEAD3	ID_14963	0	-0.51	-1.29	-1.71
	1	TPBG	ID_14965	0	-0.41	-1.91	-1.79
	1	FHOD3	ID_14995	0	-0.4	-1.28	-1.83
	1	LOC646919 /// LOC650	ID_15003	0	-0.4	-0.55	-1.1
	1	EPS8L2	ID_15042	0	-0.74	-1.75	-1.95
	1	LHX9	ID_15067	0	-2.57	-4.39	-5.07
	1	MSTO1	ID_15072	0	-0.52	-0.62	-1.21
	1	TOE1	ID_15169	0	-1.72	-2.59	-2.76
	1	PEX14	ID_15172	0	-0.88	-1.38	-1.62
	1	MAGED4 /// LOC653210	ID_15185	0	-0.02	-1.07	-2.22
	1	LOC654433	ID_15191	0	-0.51	-1.12	-1.2
	1	C6ORF51	ID_15217	0	-0.59	-1.85	-3.88
	1	C6ORF48	ID_15232	0	-0.52	-1.06	-1.07
	1	CLPP	ID_15246	0	-0.72	-1.33	-1.45
	1	SSH1	ID_15262	0	-1.25	-1.73	-1.92
	1	CCDC22	ID_15289	0	-0.47	-2.1	-3.09
	1	PODXL	ID_15303	0	0.07	-1.08	-1.76
	1	ITGA2	ID_15305	0	-0.32	-2.57	-2.75
	1	ITGA3	ID_15306	0	-0.1	-0.93	-1.11
	1	CCDC43	ID_15347	0	-0.7	-1.39	-1.55
	1	CCDC50	ID_15361	0	-0.45	-1.53	-1.93
	1	BIRC4BP	ID_15393	0	-2.18	-3.55	-3.77
	1	SSPN	ID_15441	0	-0.44	-0.68	-1.24
	1	CCDC99	ID_15461	0	-0.2	-1.09	-2.39
	1	CCDC95	ID_15465	0	-0.45	-0.69	-1.35
	1	CCDC86	ID_15483	0	0	-0.67	-1.36
	1	DPP3	ID_15497	0	-0.47	-1.15	-1.39
	1	CLN3	ID_15512	0	-0.69	-1.31	-1.65
	1	SPG3A	ID_15515	0	-0.19	-1.13	-1.17
	1	FADS2	ID_15544	0	-0.09	-0.48	-1
	1	GAS2L1	ID_15552	0	-0.51	-0.82	-1.29
	1	SSR3	ID_15560	0	-0.32	-0.91	-1.2
	1	LOC92689	ID_15573	0	-0.45	-1.11	-1.61
	1	MTHFD1L	ID_15574	0	-0.25	-1.59	-1.93
	1	STK39	ID_15577	0	-0.34	-1.28	-2.06
	1	CHAC1	ID_15588	0	-1.95	-2.86	-3.98
	1	STK10	ID_15607	0	-1.05	-1.77	-2.06
	1	CCDC107	ID_15657	0	-0.44	-1.62	-1.53
	1	FLJ43339	ID_15662	0	-2.31	-3.82	-3.87
	1	RNH1	ID_15685	0	-0.21	-0.74	-1.75
	1	TSC22D3	ID_15699	0	-0.27	-1.12	-1.41
	1	STC2	ID_15769	0	-0.58	-1.75	-2.27
	1	MRPL54	ID_15793	0	-0.73	-1.69	-1.87
	1	FREQ	ID_15831	0	-0.75	-1.3	-1.89
	1	LOC374443	ID_15833	0	-1.4	-2.77	-2.62
	1	UNG	ID_15843	0	-0.41	-1.26	-2.12
	1	MRPL12	ID_15852	0	-0.45	-0.71	-1.03
	1	MRPL15	ID_15856	0	-1.01	-1.84	-2.2
	1	MRPL23	ID_15874	0	-0.64	-1.07	-1.59
	1	STIL	ID_15881	0	-0.35	-0.98	-3.19
	1	LOC81691	ID_15886	0	-0.61	-0.6	-1.11
	1	HARS2	ID_15938	0	-0.58	-0.98	-1.39
	1	EFCAB2	ID_15941	0	-1.13	-1.69	-1.84
	1	SMC1A	ID_15956	0	-0.19	-0.43	-1.07
	1	LOC284952	ID_15968	0	-1.43	-1.84	-2.33
	1	LOC340061	ID_15974	0	-0.37	-1.76	-4.71
	1	PPP1R14B	ID_15975	0	-0.67	-1.9	-2.51
	1	GPRASP2	ID_15980	0	-0.37	-2.2	-2.13
	1	HARSL	ID_15987	0	-0.63	-0.89	-1.12
	1	PPP1R15A	ID_15991	0	-1.7	-2.49	-2.67
	1	TPM4	ID_16001	0	-0.33	-0.93	-1.93
	1	RGS19	ID_16018	0	-1.06	-1.42	-1.93
	1	RGS20	ID_16030	0	-0.55	-1.62	-2.47
	1	PCBD1	ID_16050	0	-0.37	-0.73	-1.06
	1	RCC2	ID_16054	0	-0.9	-1.96	-2.16
	1	MYBL2	ID_16064	0	-0.48	-0.86	-2.38
	1	LOC402560	ID_16074	0	-1.14	-3.44	-3.23
	1	ABHD5	ID_16123	0	-0.49	-1.41	-2.09
	1	AK3L1	ID_16133	0	-0.81	-2.36	-2.88
	1	EVC2	ID_16192	0	-0.65	-2.08	-2.11
	1	TIMELESS	ID_16193	0	-0.49	-1.43	-2.59
	1	E2F7	ID_16228	0	-0.72	-2.42	-5.48
	1	E2F8	ID_16231	0	-1.54	-1.87	-2.41
	1	SH2D4A	ID_16239	0	-1.43	-2.17	-2.75
	1	ZFPL1	ID_16243	0	-1.2	-1.66	-2.11
	1	SDC1	ID_16252	0	-0.29	-0.79	-1.59
	1	DKFZP762E1312	ID_16278	0	-1.02	-2.48	-5.82
	1	UCKL1	ID_16280	0	-0.82	-2.15	-3.41
	1	RCN1	ID_16283	0	-0.11	-0.74	-1.57
	1	WNK4	ID_16295	0	-0.36	-1.02	-1.27
	1	TGFB1I1	ID_16321	0	-1.53	-3.94	-4.2
	1	OAS3	ID_16332	0	-0.55	-0.82	-1.07
	1	RPESP	ID_16345	0	-1.45	-1.54	-1.88
	1	GPR176	ID_16391	0	-0.3	-1.11	-2.34
	1	COL3A1	ID_16407	0	-0.08	-0.52	-1.15
	1	COG7	ID_16420	0	-1.33	-2.08	-2.32
	1	COG1	ID_16426	0	-0.31	-1.43	-2.01
	1	PDGFA	ID_16433	0	-0.54	-2.13	-3.07
	1	GREM2	ID_16472	0	-0.96	-3.15	-4
	1	RBX1	ID_16474	0	-0.56	-1.24	-1.47
	1	TMPO	ID_16493	0	-0.43	-1.1	-1.38
	1	RANGNRF	ID_16503	0	-0.81	-1.54	-1.97
	1	C16ORF42	ID_16515	0	-0.41	-0.7	-1.46
	1	C2ORF32	ID_16516	0	-1.06	-2.73	-3.67
	1	C2ORF24	ID_16546	0	-0.2	-0.82	-1.51
	1	COMT	ID_16564	0	-0.24	-0.71	-1.23
	1	C16ORF34	ID_16599	0	-0.58	-0.81	-1.56
	1	C16ORF30	ID_16604	0	-1.07	-4.15	-4.42
	1	C16ORF75	ID_16620	0	-0.43	-0.72	-2.57
	1	LOC203427	ID_16624	0	-0.76	-1.67	-2.24
	1	C16ORF63	ID_16636	0	-0.58	-0.95	-1.08
	1	WFDC1	ID_16650	0	-0.57	-1.48	-3.36
	1	CCDC102B	ID_16668	0	-1.52	-1.11	-1.75
	1	EIF3S10	ID_16700	0	-0.13	-0.42	-1.2
	1	C22ORF23	ID_16705	0	-0.74	-1.15	-1.59
	1	MYADM	ID_16719	0	-0.07	-0.9	-1.92
	1	QTRT1	ID_16734	0	-0.31	-1.26	-1.53
	1	MGC4655	ID_16746	0	-0.69	-3.37	-3.55
	1	LOC541471	ID_16755	0	-0.71	-1.31	-1.44
	1	BARD1	ID_16786	0	-0.42	-1.32	-2.32
	1	SPBC24	ID_16800	0	-0.47	-0.99	-3.12
	1	NETO2	ID_16810	0	-0.26	-0.76	-1.22
	1	CNBP	ID_16814	0	-0.56	-0.99	-1.14
	1	LRIG3	ID_16823	0	-0.07	-0.74	-1.04
	1	DOCK2	ID_16825	0	-2.15	-4.31	-4.72
	1	DOCK1	ID_16828	0	-0.21	-0.97	-1.34
	1	TRAF5	ID_16835	0	-1.21	-1.92	-2.09
	1	TRAF3	ID_16838	0	-0.33	-1.41	-1.94
	1	DOCK5	ID_16846	0	-0.27	-1.02	-1.06
	1	ALG9	ID_16864	0	-0.15	-0.48	-1.52
	1	RFWD3	ID_16874	0	-0.72	-1.13	-2.29
	1	FRMD4A	ID_16875	0	-0.98	-2.85	-3.55
	1	CHD1L	ID_16890	0	-0.47	-0.91	-1.55
	1	B3GALT6	ID_16908	0	-0.88	-1.76	-1.95
	1	B3GALTL	ID_16918	0	-0.56	-1.74	-2.67
	1	PDGFRB	ID_16941	0	-0.26	-2.69	-3.48
	1	ALS2CR7	ID_16951	0	-0.54	-1.05	-1.16
	1	MOV10	ID_16956	0	-0.14	-0.73	-1.51
	1	TRAM2	ID_16958	0	-0.11	-0.9	-1.27
	1	HNRPH3	ID_16960	0	-0.48	-0.99	-1.37
	1	SMAD7	ID_16970	0	-0.83	-2.17	-1.89
	1	PDIK1L	ID_17004	0	-0.36	-1.31	-1.72
	1	SHROOM3	ID_17013	0	-1.23	-2.3	-3
	1	FGF7 /// KGFLP1 ///	ID_17018	0	-1.28	-3.03	-4.1
	1	HNRPAB	ID_17039	0	-0.32	-1.74	-3.12
	1	GADD45GIP1	ID_17059	0	-0.44	-0.66	-1.22
	1	PIGB	ID_17083	0	-0.61	-1.27	-1.33
	1	HIPK3	ID_17111	0	-1.27	-1.32	-1.72
	1	TNPO2	ID_17120	0	-0.68	-1.64	-1.57
	1	AMPD3	ID_17131	0	-0.98	-3.45	-4.12
	1	C1ORF71	ID_17146	0	-0.63	-1.12	-1.24
	1	C1ORF78	ID_17155	0	-0.76	-2.23	-2.47
	1	C1ORF80	ID_17167	0	-0.39	-0.72	-1.01
	1	DCBLD1	ID_17186	0	-0.62	-1.11	-1.24
	1	SERPINH1	ID_17191	0	0.03	-1.45	-3.11
	1	C1ORF54	ID_17195	0	-0.21	-0.58	-1.11
	1	RIBC2	ID_17206	0	-0.8	-0.79	-1.03
	1	ARMCX6 /// LOC653354	ID_17211	0	-0.22	-0.99	-1.54
	1	LDLR	ID_17251	0	-0.09	-1.27	-1.33
	1	RAP2C	ID_17272	0	-0.45	-1.29	-1.45
	1	CLIC1	ID_17278	0	-0.29	-1.41	-2.09
	1	SERPINB8	ID_17289	0	-1.54	-3.83	-4.65
	1	SERPINB7	ID_17291	0	-0.1	-0.45	-1.19
	1	C1ORF93	ID_17302	0	-0.15	-0.59	-1.41
	1	NUFIP2	ID_17310	0	-0.2	-0.88	-1.21
	1	LOC650803	ID_17337	0	-0.42	-1.25	-1.32
	1	KIF23	ID_17365	0	-0.38	-1.59	-3.72
	1	RAI1	ID_17369	0	-0.97	-2.11	-2.58
	1	SPRY4	ID_17381	0	-2.06	-4.47	-4.18
	1	C1ORF33	ID_17382	0	-0.27	-1.02	-1.65
	1	PPP2R1A	ID_17398	0	-0.3	-1	-1.52
	1	KIF15	ID_17406	0	-1.15	-1.71	-4.65
	1	C1ORF43	ID_17411	0	-0.6	-1.08	-1.26
	1	RAGE	ID_17422	0	-0.86	-1.7	-1.82
	1	UPP1	ID_17432	0	-0.49	-1.58	-1.86
	1	MYD88	ID_17479	0	-0.57	-1.56	-1.86
	1	TRA16	ID_17484	0	-1.09	-1.6	-2.07
	1	PARP12	ID_17493	0	-0.71	-1.18	-1.27
	1	CNIH3	ID_17519	0	0.23	-2.24	-3.62
	1	NCOR2	ID_17526	0	-0.18	-1.12	-1.24
	1	TUBB6	ID_17537	0	-0.38	-1.32	-3.07
	1	ICAM3	ID_17545	0	-0.45	-1.27	-1.95
	1	MBOAT1	ID_17581	0	-0.58	-1.84	-2.46
	1	ALDH1L2	ID_17597	0	-0.42	-1.14	-2.46
	1	GATA2	ID_17601	0	-0.21	-0.83	-1.51
	1	ROBO4	ID_17609	0	-0.44	-0.94	-1.24
	1	SNHG7	ID_17616	0	0.12	-0.57	-1.13
	1	SNHG3	ID_17618	0	-0.84	-1.39	-2.09
	1	WBSCR16 /// LOC65337	ID_17636	0	-0.89	-1.84	-1.92
	1	FLJ20674	ID_17665	0	-0.71	-1.15	-1.34
	1	PHC2	ID_17672	0	-0.63	-1.47	-1.33
	1	SIRT1	ID_17696	0	-1.11	-0.82	-1.28
	1	SIRPA	ID_17740	0	-0.26	-1.76	-3.27
	1	ERBB2	ID_17757	0	-0.27	-1.2	-1.82
	1	PPP1R3D	ID_17760	0	-0.28	-1.06	-1.26
	1	LOC642558	ID_17769	0	-0.56	-0.79	-1.13
	1	BTBD14A	ID_17773	0	-0.18	-0.9	-1.31
	1	PDIA5	ID_17784	0	-0.07	-0.51	-1.42
	1	RASSF1	ID_17834	0	-1.32	-2.13	-2.19
	1	RBM3	ID_17843	0	-0.74	-1.14	-2.44
	1	ANKH	ID_17893	0	-0.04	-0.93	-1.2
	1	RBMX	ID_17894	0	-0.42	-1.59	-2.57
	1	PH-4	ID_17995	0	-0.16	-0.7	-1.42
	1	LOC148203	ID_17999	0	-0.42	-1.03	-1.9
	1	UHRF1	ID_18017	0	-0.91	-1.93	-3.93
	1	PGLS	ID_18018	0	-0.73	-1.59	-1.6
	1	UHRF2	ID_18019	0	-0.77	-1.06	-1.26
	1	C12ORF57	ID_18028	0	-0.53	-1.07	-2.13
	1	CHEK1	ID_18032	0	-1.05	-2.19	-3.23
	1	WASPIP	ID_18035	0	-0.31	-1.37	-2.92
	1	NHSL1	ID_18052	0	-1.41	-2.78	-3.36
	1	C12ORF32	ID_18056	0	-0.87	-1.27	-2.01
	1	ANKRD15	ID_18066	0	-2.79	-4.6	-5.34
	1	LPGAT1	ID_18075	0	-0.26	-0.9	-1.08
	1	SGCD	ID_18091	0	-0.19	-1.11	-1.39
	1	ANKRD40	ID_18144	0	-0.72	-1.24	-1.64
	1	C12ORF41	ID_18148	0	-0.24	-0.33	-1.29
	1	TLR4	ID_18171	0	-0.74	-2.2	-3.02
	1	ANKRD57	ID_18177	0	-0.64	-1.61	-1.48
	1	ANKRD52	ID_18180	0	-0.29	-0.71	-1.18
	1	KEAP1	ID_18203	0	-2.38	-3.72	-4.18
	1	LRFN4	ID_18216	0	-0.97	-1.94	-1.97
	1	TLN1	ID_18222	0	-0.14	-0.69	-1.07
	1	NDUFC1	ID_18235	0	-0.58	-0.73	-1.12
	1	PSMB10	ID_18240	0	-0.79	-1.78	-2.6
	1	NDUFB2	ID_18253	0	-0.55	-0.81	-1.14
	1	MAP3K6	ID_18283	0	-0.77	-2.69	-2.92
	1	MAP3K5	ID_18285	0	-0.43	-1.24	-1.15
	1	SHOX	ID_18309	0	-2	-2.45	-3.18
	1	PFN1	ID_18325	0	-0.31	-0.59	-1.56
	1	RGS3	ID_18345	0	-0.2	-2.1	-2.49
	1	RGS4	ID_18346	0	0.08	-1.69	-1.78
	1	BRD9	ID_18374	0	-0.71	-1.36	-2.34
	1	BRD8	ID_18376	0	-0.91	-0.83	-1.18
	1	THOC4	ID_18399	0	-0.15	-0.9	-1.75
	1	TRIM14	ID_18416	0	-0.45	-0.72	-1.13
	1	COL7A1	ID_18428	0	0	-1.02	-1.71
	1	BRD1	ID_18433	0	-1.23	-2.23	-3.1
	1	LRRC41	ID_18438	0	-0.62	-2.37	-2.64
	1	TRIM22	ID_18456	0	-0.64	-3.46	-5.83
	1	RPS27L	ID_18475	0	-0.32	-0.61	-1.18
	1	TOPBP1	ID_18496	0	-0.49	-1.17	-1.75
	1	CSDA	ID_18499	0	-0.22	-0.74	-1.06
	1	TELO2	ID_18512	0	-0.16	-0.5	-1.28
	1	LRRC8C	ID_18538	0	-0.07	-1.2	-1.45
	1	TAF9B /// LOC653068	ID_18547	0	-0.48	-1.1	-1.1
	1	RGMB	ID_18581	0	-1.66	-2.65	-2.75
	1	ALKBH7	ID_18587	0	-0.52	-0.89	-1.49
	1	BAX	ID_18594	0	-0.78	-1.63	-1.79
	1	CREB3L1	ID_18611	0	-0.09	-0.67	-1.41
	1	LMNB1	ID_18634	0	-1.79	-2.76	-4.08
	1	LMNB2	ID_18636	0	-0.21	-0.44	-1.47
	1	IL27RA	ID_18659	0	-0.42	-1.84	-2.03
	1	AES	ID_18661	0	-0.53	-1.13	-2.1
	1	AIP	ID_18719	0	-0.59	-1.4	-1.82
	1	VEGF	ID_18726	0	-0.16	-1.01	-1.25
	1	AK5	ID_18814	0	-0.54	-1.52	-1.97
	1	BRCA1	ID_18821	0	-0.76	-1.09	-3.6
	1	TRIM56	ID_18823	0	-1.01	-1.67	-1.71
	1	TRIM59	ID_18825	0	-0.16	-0.54	-1.06
	1	LOC440900	ID_18830	0	-0.67	-1.92	-1.81
	1	PDCD5	ID_18833	0	-0.42	-0.86	-1.2
	1	SHC3	ID_18862	0	-1.1	-1.32	-1.63
	1	SP100	ID_18871	0	-0.22	-1.26	-1.47
	1	MGC19604	ID_18916	0	-0.74	-1.53	-1.85
	1	BHLHB2	ID_18950	0	-1.87	-4.78	-4.37
	1	ZHX2	ID_18959	0	-1.34	-2.76	-2.72
	1	VGLL4	ID_18970	0	-0.56	-1.33	-1.29
	1	CDC42EP1	ID_18983	0	-1.77	-3.42	-3.66
	1	PEMT	ID_18987	0	-0.28	-0.86	-1.16
	1	CDC42EP4	ID_18990	0	-0.44	-0.87	-1.05
	1	CDC42EP5	ID_18993	0	-0.23	-0.91	-2.16
	1	DVL3	ID_18997	0	-0.18	-1.74	-1.89
	1	KLF10	ID_19006	0	-0.77	-1.68	-1.79
	1	POLA2	ID_19089	0	-0.35	-0.83	-2.1
	1	TCEA3	ID_19092	0	0.27	-0.82	-1.32
	1	LOC642711	ID_19094	0	-1.05	-1.45	-2.19
	1	C21ORF45	ID_19128	0	-0.27	-0.44	-1.83
	1	HMGB2	ID_19175	0	-1.6	-1.89	-2.64
	1	HMGB3	ID_19176	0	-0.34	-1.04	-1.84
	1	POLE2	ID_19188	0	-1.34	-2.37	-3.88
	1	POLE3	ID_19190	0	-0.24	-0.93	-1.64
	1	XPOT	ID_19193	0	-0.52	-1.12	-1.2
	1	POLD3	ID_19204	0	-0.69	-1	-2.12
	1	POLD1	ID_19209	0	-0.17	-0.47	-1.08
	1	NDST1	ID_19219	0	-0.49	-2.03	-2.56
	1	HMGA1	ID_19249	0	-0.41	-0.91	-1.63
	1	BGLAP	ID_19275	0	-0.91	-1.25	-1.74
	1	COL13A1	ID_19277	0	-0.06	-1.39	-3.3
	1	IFIT2	ID_19283	0	-1.23	-1.31	-1.66
	1	IFIT5	ID_19288	0	-0.95	-1.83	-2.09
	1	NUP35	ID_19307	0	-0.69	-0.9	-2.18
	1	TWIST2	ID_19310	0	-0.61	-1.04	-1.55
	1	NUP50	ID_19329	0	-0.7	-1.77	-2.11
	1	TAX1BP3	ID_19335	0	-0.59	-1.21	-2.22
	1	POLR2A	ID_19383	0	-0.62	-1.1	-1.54
	1	POLR3E	ID_19410	0	-0.69	-1.13	-1.33
	1	PSMD14	ID_19413	0	-0.05	-0.53	-1.04
	1	ODZ4	ID_19445	0	-0.12	-0.56	-1.5
	1	TIPIN	ID_19465	0	-0.59	-0.54	-1.17
	1	PEF1	ID_19467	0	-0.7	-1.3	-1.52
	1	CUL7	ID_19550	0	-0.58	-1.22	-1.38
	1	CUL1	ID_19557	0	-1.01	-2.01	-2.27
	1	STAG1	ID_19559	0	-0.61	-2.34	-2.15
	1	JARID1D	ID_19569	0	-1.5	-2.01	-2.4
	1	SH3GL1	ID_19577	0	-0.23	-1.03	-1.54
	1	COL16A1	ID_19600	0	0.02	-0.79	-1.38
	1	SMURF2	ID_19604	0	-0.89	-2.45	-2.69
	1	MGC16291	ID_19639	0	-0.01	-1.26	-1.5
	1	DNAJC9	ID_19682	0	-0.44	-1.24	-3.12
	1	DNAJC7	ID_19684	0	-0.42	-1.11	-0.98
	1	CCDC5	ID_19700	0	-0.39	-0.78	-1.21
	1	FLJ12529	ID_19721	0	-0.88	-0.86	-1.08
	1	DNAJA4	ID_19738	0	-0.18	-1.58	-2.66
	1	SPRYD3	ID_19750	0	-0.35	-0.52	-1.35
	1	DNAJB4	ID_19762	0	-0.57	-1.51	-1.65
	1	ACOT9	ID_19772	0	-0.34	-1.05	-1.54
	1	PSMC3IP	ID_19779	0	-0.24	-1.02	-2.7
	1	COL27A1	ID_19804	0	0	-1.82	-2.2
	1	ATXN10	ID_19825	0	-0.25	-0.82	-1.2
	1	HTF9C	ID_19847	0	-0.75	-0.79	-1.17
	1	TCF25	ID_19855	0	-0.58	-1.6	-2.38
	1	TCF12	ID_19860	0	-0.54	-1.28	-1.51
	1	FANCG	ID_19873	0	-0.11	-0.75	-1.81
	1	TRIOBP	ID_19883	0	-0.44	-1.68	-3.92
	1	SLC39A13	ID_19888	0	-0.33	-1.23	-1.48
	1	DIP13B	ID_19897	0	-0.77	-2.27	-2.17
	1	FLJ20245	ID_19899	0	-0.24	-1.18	-2.75
	1	ELTD1	ID_19907	0	-0.26	-0.68	-1.96
	1	LOC51315	ID_19921	0	-1.15	-1.73	-2.35
	1	CENPC1	ID_19929	0	-1.12	-1.46	-1.62
	1	ULK2	ID_19940	0	-1.46	-2.05	-2.6
	1	FLJ20254	ID_19986	0	-0.07	-0.7	-1.47
	1	C1RL	ID_19991	0	-0.55	-1.32	-1.76
	1	LOC642981	ID_20003	0	-0.65	-1.34	-1.86
	1	GRB10	ID_20016	0	-0.43	-0.78	-1.19
	1	HEBP2	ID_20046	0	-0.54	-1.04	-1.54
	1	SEPHS1	ID_20054	0	-0.66	-0.65	-1.32
	1	PDE1C	ID_20091	0	-0.77	-4.19	-4.47
	1	RASA3	ID_20101	0	-0.19	-1.26	-2.44
	1	TRIP12	ID_20103	0	-0.36	-1.02	-0.92
	1	NADK	ID_20111	0	-0.4	-0.8	-1.52
	1	PCK2	ID_20112	0	-0.51	-1.6	-2.44
	1	CTDSPL	ID_20125	0	-0.39	-1.12	-1.38
	1	SLC7A8	ID_20126	0	0.21	-1.07	-2
	1	SPON2	ID_20143	0	-0.13	-0.67	-1.08
	1	RFNG	ID_20182	0	-0.62	-1.21	-1.42
	1	SLC7A1	ID_20192	0	-0.53	-1.55	-2.24
	1	COL8A1	ID_20240	0	-0.01	-1.13	-1.49
	1	LOC401093	ID_20257	0	-1	-1.61	-2.19
	1	ANXA4	ID_20258	0	-0.26	-0.6	-1.39
	1	CDC25A	ID_20263	0	-0.82	-1.95	-3.2
	1	CDC25B	ID_20266	0	-0.02	-1.31	-1.51
	1	C11ORF41	ID_20273	0	-0.35	-2.5	-3.95
	1	C11ORF31	ID_20298	0	-0.57	-1.03	-1.45
	1	NAV3	ID_20300	0	-2.01	-5.18	-6.31
	1	NAV1	ID_20311	0	0.08	-1.78	-2.13
	1	SLC2A10	ID_20325	0	-0.41	-2.37	-3.11
	1	C11ORF63	ID_20328	0	-1.31	-1.28	-2.45
	1	SERF1A /// SERF1B	ID_20332	0	-0.61	-1.47	-1.99
	1	S100A16	ID_20352	0	-0.53	-2.18	-3.96
	1	S100A11	ID_20355	0	-0.42	-0.75	-1.53
	1	C11ORF46	ID_20374	0	-0.78	-1.01	-1.43
	1	DNAJC11	ID_20386	0	-0.54	-0.87	-1.14
	1	FLJ11184	ID_20391	0	-0.95	-1.25	-1.75
	1	FLJ12688	ID_20400	0	-0.98	-1.13	-1.55
	1	STAT6	ID_20409	0	-0.51	-1.98	-3.97
	1	FZD8	ID_20416	0	-0.48	-1.04	-1.03
	1	FZD7	ID_20433	0	-0.12	-1.13	-1.24
	1	PBX3	ID_20444	0	-1.25	-1.59	-2.38
	1	CTPS	ID_20453	0	-0.4	-1.43	-3.26
	1	FLJ11151	ID_20466	0	-0.56	-1.3	-1.78
	1	MAP4K4	ID_20473	0	-0.08	-1.45	-2.26
	1	MAP4K5	ID_20476	0	-0.23	-1.21	-1.4
	1	SKIL	ID_20500	0	-0.3	-1.57	-1.47
	1	SUGT1	ID_20516	0	-0.23	-0.71	-1.32
	1	KCTD15	ID_20528	0	-1.88	-3.17	-3.21
	1	CPNE2	ID_20532	0	-0.75	-1.48	-2.06
	1	DNA2L	ID_20545	0	-0.08	-1.03	-1.7
	1	C11ORF69	ID_20549	0	-0.28	-3.05	-4.06
	1	CTSL	ID_20561	0	-0.16	-0.75	-1.39
	1	CTSO	ID_20564	0	-0.81	-1.41	-2.52
	1	PSTPIP2	ID_20591	0	-0.06	-1.11	-2.04
	1	PCAF	ID_20603	0	-0.03	-0.59	-1.14
