# Supplementary material for: Systematic Analysis of Time-Series Gene Expression Data on Tumor Cell-Selective Apoptotic Responses to HDAC Inhibitors
Source: Comput Math Methods Med. 2014 Oct 13;2014:867289. doi: 10.1155/2014/867289 (PMC4211306; doi:10.1155/2014/867289)
Supplement: Supplementary file 1 — Table S1. H-score of all pathways for tumor and normal samples: This table lists the name, category, website and H-score values for all 1307 pathway. Table S2. Illustrative pathways belonging to term "No responding": This table lists the name, category, website and TVPC patterns for "No responding" pathways. Table S3. Illustrative pathways belonging to term "Consistent responding": This table lists the name, category, website and TVPC patterns for "Consistent responding" pathways. Table S4. Illustrative pathways belonging to term "Tumor specific responding": This table lists the name, category, website and TVPC patterns for "Tumor specific responding" pathways. Table S5. Illustrative pathways belonging to term "Normal specific responding": This table lists the name, category, web site and TVPC patterns for "Normal specific responding" pathways. Table S6. Illustrative pathways belonging to term "Divergent responding": This table lists the name, category, website and TVPC patterns for "Divergent responding" pathways. Table S7. Genes within profile #0 for normal samples: This table contains all genes within profile #0 for normal samples, and lists the normalized expression data to the right of gene symbol. Table S8. Genes within profile #2 for normal samples: This table contains all genes within profile #2 for normal samples, and lists the normalized expression data to the right of gene symbol. Table S9. Genes within profile #9 for normal samples: This table contains all genes within profile #9 for normal samples, and lists the normalized expression data to the right of gene symbol. Table S10. Genes within profile #12 for normal samples: This table contains all genes within profile # 12 for normal samples, and lists the normalized expression data to the right of gene symbol. Table S11. Genes within profile #14 for normal samples: This table contains all genes within profile #14 for normal samples, and lists the normalized expression data to the right of gene symbol. Ta [file 867289.f1.zip › 867289.f1/Table S9.xls]

## Sheet: Sheet1
Gene Table for Profile 9 (0.0,1.0,0.0,-2.0) Normal
Num. Genes Expected	Num. Genes Assigned	P-Value	Significant
325	279.2	0.0032	(significant)
-------
Selected	Weight	Gene Symbol	SPOT	0h	4h	12h	24h
	1	TFPI	ID_39	0	-0.13	-1.45	-4.38
	1	FANCD2	ID_114	0	-0.01	0.01	-2.3
	1	NEK2	ID_348	0	0.94	1.41	-3.53
	1	VRK1	ID_357	0	-0.04	-0.58	-2.39
	1	APOBEC3B	ID_446	0	-0.21	-0.6	-4.26
	1	PPIH	ID_490	0	0.02	0.07	-1.01
	1	ANTXR1	ID_505	0	0.06	-0.75	-1.8
	1	ADCY3	ID_837	0	0.14	-0.19	-0.97
	1	DEPDC1B	ID_860	0	-0.31	-0.39	-2.8
	1	DEPDC1	ID_867	0	-0.69	-1.23	-5.5
	1	BUB1B	ID_1092	0	-0.01	-0.86	-4.02
	1	HNRPM	ID_1144	0	0.31	0.19	-1.33
	1	PRC1	ID_1313	0	-0.22	-0.94	-3.64
	1	KNTC2	ID_1335	0	-0.3	-1.27	-4.85
	1	TTYH3	ID_1357	0	0.12	-0.4	-1.1
	1	MBD4	ID_1558	0	0.81	-0.24	-0.8
	1	TPCN2	ID_1585	0	0.42	-0.18	-0.96
	1	BIRC5	ID_1596	0	-0.59	-0.58	-5.04
	1	TROAP	ID_1681	0	-0.03	-0.41	-1.62
	1	CDCA2	ID_1812	0	1.52	0.7	-2.81
	1	CDCA1	ID_1813	0	-0.18	-1.13	-5.49
	1	CDCA3	ID_1817	0	-0.32	-0.68	-5.11
	1	DAAM2	ID_1849	0	0.72	0.25	-0.7
	1	BUB1	ID_1923	0	0.19	-0.19	-4.91
	1	ARMET	ID_1949	0	0.13	0.05	-1.17
	1	UNC5B	ID_1953	0	0.49	-0.3	-0.6
	1	NEIL3	ID_1969	0	-0.03	-0.71	-3.85
	1	IRX2	ID_2054	0	0.86	-0.64	-2.14
	1	FLJ25416	ID_2082	0	1.38	0.71	-4.27
	1	APAF1	ID_2084	0	0.6	-0.29	-0.98
	1	PFKFB4	ID_2117	0	0.35	-0.77	-1.47
	1	PFKFB3	ID_2118	0	0.9	-0.04	-0.58
	1	CDC20	ID_2144	0	0.28	-0.47	-6.44
	1	RBM14	ID_2254	0	0.22	-0.24	-1.63
	1	AADACL1	ID_2275	0	0.72	0.34	-1.16
	1	SGOL2	ID_2290	0	0.31	0.4	-1.98
	1	TBL2	ID_2335	0	-0.02	-0.71	-2.06
	1	CD274	ID_2352	0	0.45	-0.93	-1.36
	1	MCM8	ID_2374	0	0.29	0.05	-1.61
	1	MCM7	ID_2375	0	-0.21	-1.11	-3.65
	1	MCM4	ID_2412	0	-0.11	-0.57	-2.82
	1	MCM5	ID_2413	0	-0.19	-0.79	-2.85
	1	RACGAP1	ID_2458	0	0.02	-0.31	-1.92
	1	SLC6A8	ID_2468	0	0.07	-0.2	-1.03
	1	KIAA0690	ID_2605	0	0.79	0.19	-0.58
	1	FEN1	ID_2625	0	-0.18	-1.18	-3.54
	1	TACC3	ID_2668	0	0.12	-0.3	-4.33
	1	HMGB1 /// HMG1L1 ///	ID_2712	0	-0.06	-0.26	-1.41
	1	ZWILCH	ID_3006	0	0.5	0.37	-1.79
	1	GBP1	ID_3064	0	0.5	-0.46	-2.29
	1	BLM	ID_3065	0	0.26	0.22	-4.42
	1	TAP2	ID_3131	0	0.16	-0.15	-0.89
	1	TRPV2	ID_3232	0	0.01	-1.04	-2.96
	1	MASTL	ID_3238	0	-0.19	-0.49	-2.93
	1	CCNB1	ID_3276	0	-0.05	-0.61	-4
	1	CCNB2	ID_3280	0	-0.47	-1.04	-5.16
	1	METRNL /// LOC653506	ID_3371	0	0.57	0.07	-1.02
	1	UAP1	ID_3543	0	0.85	0.24	-0.4
	1	CIT	ID_3625	0	0.24	-0.05	-1.86
	1	SOX11	ID_3798	0	0.82	-1.19	-2.32
	1	SLC1A4	ID_4045	0	0.39	-0.78	-1.51
	1	SLC1A5	ID_4046	0	0.35	-0.24	-0.9
	1	UAP1L1	ID_4179	0	0.11	-0.6	-2.09
	1	ARSB	ID_4199	0	0.03	-0.18	-1.08
	1	ARS2	ID_4264	0	0.28	-0.13	-1.04
	1	DTL	ID_4283	0	-0.11	-0.48	-3.63
	1	DIAPH3	ID_4313	0	0.18	-0.04	-2.8
	1	UBADC1	ID_4596	0	0.33	0.08	-0.69
	1	ASPH	ID_4621	0	0	-0.35	-1.51
	1	ASPM	ID_4622	0	-0.01	-0.59	-4.28
	1	LOXL1	ID_4725	0	-0.07	-1.02	-2.81
	1	FBN1	ID_4770	0	0.06	-0.27	-1.05
	1	POSTN	ID_4786	0	0.06	-0.42	-0.94
	1	MAD2L1	ID_4815	0	-0.04	-0.42	-3.47
	1	POLQ	ID_4834	0	0.24	-0.15	-2.69
	1	HNRPA2B1	ID_4908	0	0.02	-0.44	-1.14
	1	MCM10	ID_4916	0	-0.36	-0.89	-3.97
	1	CDKN2D	ID_5205	0	0.55	-0.02	-0.73
	1	KIAA0286	ID_5424	0	0.61	-0.17	-1.97
	1	FAM64A	ID_5459	0	0.74	0.9	-3.15
	1	NCAPH	ID_5546	0	-0.68	-1.2	-4.89
	1	NCAPG	ID_5548	0	-0.31	-1.18	-4.68
	1	MMP1	ID_5597	0	0.11	-0.2	-1.44
	1	QTRTD1	ID_5650	0	0.34	-0.46	-1.05
	1	NY-SAR-48	ID_5652	0	-0.19	-0.56	-2.15
	1	NEDD1	ID_5684	0	0.08	-0.1	-1.39
	1	CEP55	ID_5750	0	0.5	0.89	-3.03
	1	GNG2	ID_5801	0	0.76	0.39	-0.42
	1	LOC285989	ID_5851	0	0.7	0.22	-1.14
	1	RRM2	ID_5913	0	0.02	-0.05	-3.88
	1	IQGAP3	ID_5993	0	0.21	-0.47	-3.27
	1	SUV39H2	ID_6079	0	-0.07	-0.04	-1.14
	1	PBK	ID_6115	0	0.04	-1.04	-5.36
	1	ZFAND2A	ID_6131	0	0.22	-0.45	-1.07
	1	DCLRE1B	ID_6231	0	-0.05	-0.62	-1.84
	1	STS-1	ID_6264	0	0.4	-0.62	-2.25
	1	FAM54A	ID_6289	0	0.41	0.12	-1.63
	1	SLC38A6	ID_6436	0	-0.01	-0.43	-1.38
	1	ECT2	ID_6494	0	-0.13	-0.37	-1.58
	1	EIF4G2	ID_6501	0	-0.07	-0.42	-1.28
	1	KIAA0101	ID_6526	0	0.08	0.17	-1.41
	1	CENPN	ID_6562	0	-0.24	-0.77	-2.6
	1	CENPM	ID_6565	0	0	-0.15	-2.3
	1	CENPQ	ID_6568	0	0.02	-0.23	-2.06
	1	CENPF	ID_6572	0	0.56	0.17	-3.28
	1	CENPE	ID_6573	0	-0.04	-0.68	-4.36
	1	CENPK	ID_6574	0	0.01	-0.19	-2.21
	1	CENPJ	ID_6576	0	0.73	0.31	-1.44
	1	CENPI	ID_6578	0	0.22	0.39	-2.29
	1	C3ORF52	ID_6583	0	0.27	-0.54	-1.3
	1	LOC389831	ID_6624	0	0.15	-0.73	-1.76
	1	NCAPG2	ID_6680	0	0.44	0.52	-1.68
	1	RECQL4	ID_6694	0	0.1	-0.46	-1.06
	1	ZNF551	ID_6789	0	0.15	-0.23	-0.88
	1	C17ORF41	ID_6918	0	0.75	0.15	-0.43
	1	C1ORF112	ID_7039	0	-0.07	-0.48	-1.53
	1	C1ORF135	ID_7101	0	0.38	-0.13	-1.17
	1	HSPH1	ID_7159	0	0.58	-0.04	-1.16
	1	KIF20A	ID_7238	0	-0.01	0.02	-5.46
	1	FAM83D	ID_7310	0	0.16	0.22	-4.58
	1	RANBP1	ID_7323	0	-0.15	-0.29	-1.28
	1	SHCBP1	ID_7344	0	-0.3	-0.69	-5.5
	1	KIAA1026	ID_7530	0	0.27	-0.26	-1.2
	1	MICAL2	ID_7563	0	0.19	-0.15	-1.1
	1	FAM7A2	ID_7786	0	0.79	-0.4	-1.85
	1	SFRS3	ID_7838	0	0.4	-0.7	-1.86
	1	SFRS2	ID_7839	0	-0.08	-0.38	-1.72
	1	RAD54L	ID_7883	0	-0.31	-0.41	-2.47
	1	RAD54B	ID_7896	0	0.25	0.44	-1.06
	1	BAG3	ID_7912	0	0.46	-0.27	-0.77
	1	RPRC1	ID_8057	0	0.33	-0.42	-0.97
	1	ZNF92	ID_8073	0	0.34	-0.3	-0.85
	1	ZNF714	ID_8080	0	1.34	0.52	-0.38
	1	KIF18A	ID_8112	0	0.19	-0.19	-2.63
	1	KIAA1794	ID_8202	0	0.14	-0.08	-2.43
	1	KIAA1754	ID_8212	0	0.72	-0.9	-2.35
	1	TMEM2	ID_8352	0	0.61	-0.79	-1.4
	1	LRP8	ID_8369	0	0.21	-0.35	-1.15
	1	IL11	ID_8389	0	0.52	-1.81	-3.69
	1	RNASEH2A	ID_8418	0	-0.13	0.05	-2.61
	1	SAMD11	ID_8565	0	0.48	-0.51	-1.03
	1	KLHDC8B	ID_8660	0	1.01	0.03	-0.57
	1	CHAF1A	ID_8682	0	0.17	-0.48	-2.4
	1	CHAF1B	ID_8684	0	-0.05	0.03	-1.19
	1	NRP2	ID_8688	0	0.94	0.47	-0.39
	1	CCNF	ID_8719	0	-0.04	-0.48	-2.59
	1	RAD18	ID_8813	0	-0.01	-0.66	-2.11
	1	CD97	ID_8859	0	0.27	-0.93	-2.4
	1	SPAG5	ID_8960	0	-0.13	-0.91	-3.89
	1	PUS1	ID_8968	0	0.31	-0.62	-1.28
	1	CDC6	ID_9051	0	0.87	0.41	-3.4
	1	CDC2	ID_9060	0	0.1	-0.17	-4.64
	1	ZNF443	ID_9144	0	0.4	0.17	-0.6
	1	CDK2	ID_9259	0	0.12	-0.4	-1.46
	1	KPNA2 /// LOC643995	ID_9363	0	0.3	0.3	-1.13
	1	TNFRSF10A	ID_9433	0	0.09	-0.61	-1.48
	1	LOX	ID_9490	0	-0.05	-0.67	-1.85
	1	LOC201725	ID_9583	0	0.36	-0.48	-1.49
	1	KIAA1524	ID_9656	0	0.06	-0.28	-3.31
	1	PDSS1	ID_9682	0	-0.07	-0.34	-1.36
	1	ZNF141	ID_9761	0	0.66	0.01	-0.54
	1	ZNF136	ID_9774	0	0.41	-0.33	-1.36
	1	HELLS	ID_9858	0	-0.01	-0.29	-1.82
	1	CASP3	ID_9891	0	0.24	-0.59	-1.14
	1	ATP2A2	ID_10066	0	0.38	0.11	-1.22
	1	HMMR	ID_10146	0	-0.28	-0.57	-6.33
	1	SVIL	ID_10185	0	0.2	-0.46	-1
	1	MSN	ID_10340	0	0	-0.37	-1.45
	1	TMEM48	ID_10418	0	0.24	0.14	-0.77
	1	H2-ALPHA	ID_10451	0	-0.05	-0.1	-1.52
	1	C20ORF119	ID_10466	0	0.4	-0.49	-0.74
	1	GALNAC4S-6ST	ID_10534	0	0.55	0.1	-0.75
	1	STX5	ID_10570	0	0.64	-0.05	-0.41
	1	MFSD2	ID_10603	0	1.13	0.08	-0.59
	1	MPHOSPH1	ID_10663	0	0.01	0.05	-1.87
	1	KIAA1462	ID_10695	0	0.44	-0.76	-1.39
	1	PTGFRN	ID_10714	0	0.03	-0.43	-1.06
	1	RP13-15M17.2	ID_10779	0	0.33	-0.18	-2.44
	1	NUSAP1	ID_10787	0	0.02	-0.05	-3.48
	1	NCL	ID_10789	0	-0.03	-0.31	-1.1
	1	GALNT7	ID_10809	0	-0.02	-0.34	-1.31
	1	GALNT4	ID_10814	0	0.59	-0.36	-0.94
	1	NES	ID_10831	0	0.38	0.12	-0.66
	1	C14ORF139	ID_10947	0	0.67	-0.67	-0.95
	1	CASC5	ID_11084	0	0	-0.2	-3.17
	1	ERRFI1	ID_11241	0	0.55	-0.79	-0.95
	1	SLBP	ID_11402	0	0.58	-0.15	-1.36
	1	OSGEP	ID_11472	0	-0.21	-0.46	-1.83
	1	SLC16A3	ID_11569	0	0.14	-0.27	-0.87
	1	SLC25A22	ID_11611	0	0.25	-0.58	-0.85
	1	EMP3	ID_11646	0	-0.27	-0.95	-3.73
	1	SSX2IP	ID_11665	0	0.11	-0.24	-1.02
	1	SLC25A12	ID_11680	0	0.72	0.12	-0.33
	1	EML1	ID_11736	0	0.03	-0.36	-2.23
	1	SYPL2	ID_11822	0	0.34	0.23	-0.78
	1	MKI67	ID_11834	0	-0.12	-1.41	-6.1
	1	ANGPTL2	ID_11948	0	0.11	-0.39	-0.91
	1	ANGPTL4	ID_11949	0	1.25	-2.49	-3.14
	1	SMC4	ID_12047	0	-0.12	-0.77	-2.79
	1	FAM43A	ID_12125	0	0.71	-0.98	-1.48
	1	D21S2056E	ID_12149	0	0.13	-0.21	-1.3
	1	2014-09-11	ID_12406	0	-0.01	-0.53	-1.73
	1	ANKRD13A	ID_12542	0	0.33	0.02	-0.74
	1	STMN1	ID_12553	0	0.07	-0.18	-1.4
	1	PGBD1	ID_12754	0	0.18	-0.76	-1.72
	1	SNX8	ID_12811	0	0	-0.64	-2.58
	1	KLHL21	ID_12861	0	0.36	-0.18	-0.75
	1	UBE2C	ID_12881	0	-0.35	-1.52	-5.48
	1	TTC19	ID_13120	0	0.69	0.38	-0.43
	1	ZAK	ID_13141	0	-0.07	-0.54	-2.04
	1	LOC642395 /// LOC649	ID_13206	0	0.13	-0.88	-1.98
	1	TUBB	ID_13208	0	-0.12	-0.43	-1.44
	1	ORC6L	ID_13214	0	-0.17	-0.76	-3.62
	1	DLG7	ID_13235	0	0.61	0.66	-5.85
	1	ATAD3A	ID_13371	0	0.06	-0.45	-1.13
	1	RRBP1	ID_13411	0	0.08	-0.42	-1.27
	1	ENTPD7	ID_13481	0	0.5	-0.66	-1.01
	1	WDR1	ID_13509	0	-0.1	-0.32	-1.36
	1	MYO1E	ID_13794	0	0.76	0.32	-0.85
	1	DDEF2	ID_13867	0	0.49	-0.46	-0.93
	1	TTK	ID_13973	0	-0.54	-0.66	-3.74
	1	CKS1B	ID_14076	0	-0.16	-0.42	-3.73
	1	TUBB2C	ID_14131	0	0	0.11	-1.44
	1	BCL2L12	ID_14158	0	0.56	0.55	-0.93
	1	SQLE	ID_14246	0	0.62	-0.06	-0.45
	1	ACTN1	ID_14299	0	0	-0.39	-1.22
	1	SHB	ID_14430	0	0.64	-0.51	-1.18
	1	SLC19A1	ID_14548	0	-0.09	-0.47	-1.94
	1	SRC	ID_14627	0	0.22	-0.68	-1.62
	1	SLK	ID_14684	0	0.15	-0.65	-1.43
	1	ASF1B	ID_14956	0	0.62	0.64	-3.91
	1	BRIP1	ID_14960	0	0.01	-0.62	-3.86
	1	CCDC18	ID_15257	0	0.55	0.22	-0.85
	1	ITGA5	ID_15312	0	0.12	-0.56	-1.29
	1	LOC286167	ID_15320	0	0.72	-0.12	-0.67
	1	LHFP	ID_15439	0	0.08	-0.39	-1.04
	1	TPX2	ID_15514	0	-0.03	-0.75	-3.24
	1	DHFR /// LOC643509 /	ID_15531	0	-0.17	-0.45	-2.93
	1	PDZRN3	ID_15545	0	1.07	0.52	-0.5
	1	AACS	ID_15556	0	0.47	0.23	-0.77
	1	STK24	ID_15590	0	0.38	-0.07	-0.7
	1	VDR	ID_15611	0	0.09	-0.41	-1.22
	1	MRPL35	ID_15764	0	0.15	-0.34	-1.03
	1	TOP2A	ID_15828	0	0.34	-0.07	-3.35
	1	ATAD2	ID_15947	0	0.19	-0.36	-3.01
	1	CKS2	ID_16034	0	0.62	0.64	-1.27
	1	MYBL1	ID_16060	0	1.16	0.22	-1.54
	1	PRPSAP1	ID_16086	0	0.33	-0.28	-0.94
	1	DKFZP586C0721	ID_16144	0	2.56	0.89	-1.03
	1	K-ALPHA-1	ID_16180	0	-0.09	-0.08	-1.42
	1	BAK1 /// BCL2L7P1	ID_16367	0	0.36	-0.08	-1.02
	1	ANPEP	ID_16381	0	0.01	-0.44	-1.29
	1	DHFR /// LOC643509	ID_16431	0	0	-0.02	-1.8
	1	SLCO4A1	ID_16457	0	0.51	0.22	-1.05
	1	MGC4692	ID_16679	0	0.53	0.42	-1.03
	1	SELS	ID_16767	0	0.08	-0.48	-1.29
	1	SPBC25	ID_16802	0	-0.41	-1.49	-5.64
	1	DOCK7	ID_16844	0	0.14	-0.26	-1.13
	1	RP11-11C5.2	ID_16904	0	-0.07	-0.16	-1.4
	1	HNRPDL	ID_17003	0	0.23	-0.43	-1.04
	1	TNS1	ID_17050	0	0.66	0.16	-1.08
	1	GALNACT-2 /// LOC644	ID_17065	0	0.12	-0.39	-1.04
	1	KHDRBS3	ID_17092	0	0.36	-0.42	-1.32
	1	CNN2	ID_17117	0	-0.1	-0.31	-1.27
	1	C1ORF79	ID_17154	0	0.82	-0.02	-0.88
	1	KIF4A	ID_17187	0	-0.07	-0.87	-4.15
	1	PDE4DIP /// LOC64253	ID_17253	0	0.78	0.41	-0.52
	1	C1ORF96	ID_17318	0	1.1	0.3	-0.74
	1	SFPQ	ID_17332	0	0.36	-0.26	-1.19
	1	KIF22	ID_17367	0	-0.11	-1.04	-3.28
	1	KIF2C	ID_17387	0	0.14	-0.73	-6.39
	1	KIF14	ID_17397	0	-0.18	-0.21	-4.13
	1	KIF11	ID_17402	0	0.06	-0.81	-4.21
	1	COL5A2	ID_17456	0	0.16	-0.42	-1.15
	1	TUBB3	ID_17539	0	0.09	0.11	-1.01
	1	TUBA2	ID_17584	0	-0.11	-0.09	-1.47
	1	TUBA6	ID_17589	0	-0.06	-0.04	-1.4
	1	PHF20	ID_17783	0	0.07	-0.19	-1.35
	1	GALNACT-2	ID_17788	0	0.25	-0.3	-0.9
	1	RASSF3	ID_17829	0	0.36	-0.48	-0.82
	1	SNRPA1	ID_17861	0	-0.05	-0.47	-1.44
	1	ANLN	ID_17879	0	0.22	-0.05	-4.54
	1	H2AFZ	ID_18000	0	-0.08	-0.46	-1.42
	1	H2AFX	ID_18004	0	0.22	-0.18	-2.16
	1	NOTCH1	ID_18047	0	0.64	-0.16	-0.83
	1	ANKRD25	ID_18088	0	0.17	-0.18	-0.85
	1	MYBBP1A	ID_18311	0	0.09	-0.29	-1.11
	1	EZH2	ID_18360	0	0.12	-0.31	-1.56
	1	TRIM28	ID_18441	0	0	-0.28	-1.02
	1	AXL	ID_18445	0	0.22	-0.27	-1.01
	1	TRIM26	ID_18449	0	0.52	-0.28	-0.88
	1	NDE1	ID_18544	0	0.21	-0.03	-0.95
	1	ACD	ID_18640	0	0.16	0.09	-1.35
	1	PFAS	ID_18687	0	-0.11	-0.24	-1.33
	1	C21ORF25	ID_18777	0	0.42	-1	-1.75
	1	PFKP	ID_18873	0	0.09	-0.25	-1.27
	1	MLF1IP	ID_18917	0	0.04	-0.11	-2.69
	1	HSPA14	ID_19028	0	0.14	-0.56	-1.28
	1	POLA1	ID_19086	0	0.34	0.12	-1.14
	1	CDC45L	ID_19091	0	0.2	-0.52	-3.85
	1	SIX1	ID_19170	0	0.57	-0.05	-0.73
	1	HMGB1	ID_19174	0	-0.04	-0.25	-1.33
	1	CSPG4	ID_19427	0	0.03	-1.22	-3.19
	1	EPB41L3	ID_19632	0	-0.01	-0.14	-1.17
	1	SLC8A1	ID_19654	0	0.25	-0.5	-0.91
	1	CNDP2	ID_19676	0	-0.07	-0.31	-1.09
	1	LOC652689 /// FAM72A	ID_19707	0	0.47	0.74	-3.1
	1	FSCN1	ID_19749	0	0.55	0.31	-0.77
	1	EXO1	ID_19805	0	0.46	0.02	-4.63
	1	FANCM	ID_19866	0	1.59	0.94	-2.12
	1	FANCA	ID_19874	0	-0.17	-0.28	-2.03
	1	FANCB	ID_19875	0	0.32	0.66	-1.6
	1	TGM2	ID_19967	0	0.21	0.06	-0.8
	1	PSRC1	ID_19982	0	0.44	-0.16	-1.52
	1	DNMT3B	ID_20033	0	1.61	0.61	-1.35
	1	TRIP13	ID_20105	0	-0.39	-1.11	-4.07
	1	COL15A1	ID_20108	0	0.02	-0.63	-1.56
	1	MLXIP	ID_20238	0	0.71	0.02	-0.56
	1	CDC25C	ID_20256	0	-0.13	0.18	-3.19
	1	DHRS7B	ID_20301	0	0.15	0.29	-0.82
	1	ESCO2	ID_20304	0	0.99	0.51	-1.67
	1	RFC5	ID_20305	0	0.52	0.51	-2.01
	1	RFC3	ID_20309	0	0.03	-0.39	-3.47
	1	NASP	ID_20422	0	0.41	0.14	-1.25
	1	FLJ20105	ID_20456	0	-0.52	-0.79	-4.1
