# Supplementary material for: Systematic Analysis of Time-Series Gene Expression Data on Tumor Cell-Selective Apoptotic Responses to HDAC Inhibitors
Source: Comput Math Methods Med. 2014 Oct 13;2014:867289. doi: 10.1155/2014/867289 (PMC4211306; doi:10.1155/2014/867289)
Supplement: Supplementary file 1 — Table S1. H-score of all pathways for tumor and normal samples: This table lists the name, category, website and H-score values for all 1307 pathway. Table S2. Illustrative pathways belonging to term "No responding": This table lists the name, category, website and TVPC patterns for "No responding" pathways. Table S3. Illustrative pathways belonging to term "Consistent responding": This table lists the name, category, website and TVPC patterns for "Consistent responding" pathways. Table S4. Illustrative pathways belonging to term "Tumor specific responding": This table lists the name, category, website and TVPC patterns for "Tumor specific responding" pathways. Table S5. Illustrative pathways belonging to term "Normal specific responding": This table lists the name, category, web site and TVPC patterns for "Normal specific responding" pathways. Table S6. Illustrative pathways belonging to term "Divergent responding": This table lists the name, category, website and TVPC patterns for "Divergent responding" pathways. Table S7. Genes within profile #0 for normal samples: This table contains all genes within profile #0 for normal samples, and lists the normalized expression data to the right of gene symbol. Table S8. Genes within profile #2 for normal samples: This table contains all genes within profile #2 for normal samples, and lists the normalized expression data to the right of gene symbol. Table S9. Genes within profile #9 for normal samples: This table contains all genes within profile #9 for normal samples, and lists the normalized expression data to the right of gene symbol. Table S10. Genes within profile #12 for normal samples: This table contains all genes within profile # 12 for normal samples, and lists the normalized expression data to the right of gene symbol. Table S11. Genes within profile #14 for normal samples: This table contains all genes within profile #14 for normal samples, and lists the normalized expression data to the right of gene symbol. Ta [file 867289.f1.zip › 867289.f1/Table S10.xls]

## Sheet: Sheet1
Gene Table for Profile 12 (0.0,1.0,2.0,3.0) Normal
Num. Genes Expected	Num. Genes Assigned	P-Value	Significant
1593	393.8	0	(significant)
-------
Selected	Weight	Gene Symbol	SPOT	0h	4h	12h	24h
	1	TMEFF2	ID_18	0	1.63	5.64	5.19
	1	ZSCAN2	ID_64	0	0.81	1.77	1.96
	1	PARP1	ID_80	0	0.15	0.67	1.03
	1	ACAD10	ID_81	0	-0.22	0.22	1.1
	1	AMY2B	ID_95	0	0.7	1.59	1.77
	1	LOC401320	ID_134	0	-0.06	0.23	1.02
	1	DHCR7	ID_138	0	0.76	1.39	1.51
	1	MANBA	ID_145	0	0.49	0.79	1.16
	1	C20ORF3	ID_146	0	0.32	0.94	1.63
	1	CTNNBL1	ID_160	0	0.31	0.84	1.05
	1	IL11RA	ID_178	0	0.17	0.5	1.19
	1	HDAC3	ID_232	0	1.27	2.11	2.27
	1	HIST2H4 /// H4/O ///	ID_254	0	1.05	1.88	3.2
	1	ALS2CR13	ID_257	0	1.54	2.05	3.04
	1	ALS2CR11	ID_261	0	0.17	0.75	1.53
	1	MAPRE2	ID_277	0	1.4	2.46	2.53
	1	MAPRE3	ID_279	0	0.27	0.82	1.21
	1	GCA	ID_310	0	2.02	4.16	4.29
	1	NELL2	ID_318	0	0.04	0.68	2.39
	1	NEK9	ID_336	0	0.09	0.74	1.4
	1	NEK1	ID_350	0	0.64	2.15	2.28
	1	MAML3	ID_360	0	0.91	1.31	2.56
	1	STEAP3	ID_390	0	0.58	1.25	1.29
	1	NEO1	ID_415	0	0.9	1.96	2.6
	1	TEX9	ID_428	0	1.34	3.14	3.52
	1	SEC11L3	ID_429	0	0.45	1.79	2.67
	1	BLVRA	ID_430	0	0.61	1.43	1.52
	1	BLVRB	ID_438	0	0.43	1.16	1.8
	1	TTC21A	ID_452	0	0.4	1.28	1.75
	1	DCAMKL1	ID_455	0	0.1	0.67	1.31
	1	GFM2	ID_471	0	0.47	1.21	1.42
	1	PLEKHA5	ID_492	0	0.58	0.68	1.18
	1	PLEKHB1	ID_521	0	0.15	0.07	1.03
	1	NEF3	ID_541	0	1.02	2.79	3.43
	1	NEFH	ID_547	0	0.21	2.99	4.33
	1	NEFL	ID_552	0	0.05	1.82	2.34
	1	ACBD4	ID_587	0	0	0.81	1.48
	1	PTPRN	ID_609	0	0.11	0.88	1.74
	1	ACADSB	ID_614	0	0.58	1.9	2.46
	1	FAM108A1	ID_632	0	0.42	1.02	1.37
	1	MAOA	ID_634	0	0.19	1.54	2.82
	1	MAP2	ID_641	0	2.38	5.25	6.45
	1	MAP7	ID_645	0	0.28	1.04	2.57
	1	MAP9	ID_647	0	0.4	1.65	2.04
	1	SDHAL1	ID_662	0	0.25	0.88	1.15
	1	ADCK5	ID_667	0	-0.31	0.67	1.62
	1	SLC4A8	ID_708	0	0.13	1.65	2.21
	1	EXPH5	ID_716	0	3.14	3.78	4.32
	1	COPG2	ID_745	0	0.03	0.69	1.24
	1	SRXN1	ID_747	0	0.86	0.82	1.51
	1	WWC1	ID_768	0	1.01	1.78	1.78
	1	WWC2	ID_769	0	0.5	0.92	1.05
	1	RTBDN	ID_853	0	0	0.27	1.65
	1	DEPDC6	ID_862	0	-0.01	0.65	2.01
	1	C14ORF37	ID_878	0	0.18	1.88	3.28
	1	HIP1R	ID_917	0	0.7	1.43	1.44
	1	TTC30A	ID_929	0	-0.04	1.5	2.5
	1	NFS1	ID_953	0	0.36	1.33	1.91
	1	MEG3	ID_956	0	0.44	0.77	1.41
	1	KLHL2	ID_982	0	0.08	0.58	1.15
	1	KLHL8	ID_987	0	0.56	1.18	1.47
	1	GNS	ID_1006	0	0.25	0.85	1.38
	1	FLJ16641	ID_1007	0	0.31	2	3.46
	1	IQCA	ID_1009	0	-0.01	0.68	2.34
	1	IQCH	ID_1010	0	-0.01	1.12	1.42
	1	RP11-647M7.1	ID_1017	0	1.01	3.56	4.4
	1	TMSL8	ID_1029	0	-0.12	1.11	1.95
	1	SLC30A3	ID_1030	0	0.42	1.68	2.02
	1	MEST	ID_1037	0	0.57	1.17	1.63
	1	PTPN3	ID_1047	0	0.07	1.18	1.55
	1	GSR	ID_1067	0	0.37	0.82	1.09
	1	C14ORF92	ID_1077	0	0.64	0.84	1.16
	1	KIAA0907	ID_1080	0	0.58	0.63	1.17
	1	C14ORF82	ID_1096	0	-0.15	0.31	1.09
	1	MAL2	ID_1101	0	0.05	1.4	1.55
	1	SH3GLB2	ID_1109	0	0.73	1.41	1.85
	1	NOMO1 /// NOMO2 ///	ID_1114	0	0.28	0.57	1.05
	1	SPTAN1	ID_1136	0	0.97	1.21	1.38
	1	INA	ID_1156	0	1.77	3.54	3.87
	1	LOC647065	ID_1158	0	0.04	0.75	1.33
	1	ARL8B	ID_1177	0	0.22	0.79	1.05
	1	HD	ID_1209	0	0.3	1.03	1.61
	1	KCNAB2	ID_1225	0	0.95	1.41	1.96
	1	HYAL1	ID_1241	0	0.01	0.76	3.93
	1	KIAA1946	ID_1242	0	0.59	1.52	1.73
	1	HYAL3	ID_1247	0	0.09	0.35	1.21
	1	HIST1H1C	ID_1248	0	0.57	0.72	2.01
	1	SORT1	ID_1256	0	0.95	1.83	1.79
	1	EXOC6	ID_1284	0	0.65	1.52	1.7
	1	NBEAL1	ID_1291	0	-0.02	0.79	1
	1	KIAA1967	ID_1305	0	0.99	1.31	1.49
	1	CD302	ID_1309	0	-0.13	0.59	1.75
	1	LZTFL1	ID_1321	0	1	1.69	1.91
	1	POLR2J2	ID_1333	0	0.64	0.65	1.51
	1	PRCP	ID_1337	0	0.16	0.79	1.48
	1	ABCA7	ID_1339	0	0.41	1.59	2.01
	1	ABCA3	ID_1353	0	0.01	0.37	1.32
	1	ABCA5	ID_1356	0	0.03	0.65	1.42
	1	KDELC1	ID_1358	0	0.8	1.4	1.47
	1	TTYH2	ID_1363	0	0.51	2.88	3.8
	1	HIST1H4D	ID_1369	0	0.08	0.08	1.44
	1	HIST1H4H	ID_1371	0	0.21	0.17	2.47
	1	NR4A2	ID_1382	0	1.58	1.93	2.43
	1	ABCB1	ID_1384	0	0.46	2.58	2.56
	1	NR4A3	ID_1385	0	1.24	2.1	2.59
	1	CXCL14	ID_1395	0	0.5	0.96	1.26
	1	HIST1H3H	ID_1410	0	0.53	1.02	3.58
	1	PC	ID_1412	0	0.46	1.33	1.25
	1	LOC652900	ID_1422	0	0.64	0.62	1.45
	1	TPD52	ID_1464	0	0.46	1.91	1.9
	1	MAP3K7IP3	ID_1497	0	0.76	0.78	1.27
	1	EPHB6	ID_1501	0	0.07	0.65	1.35
	1	CELSR3	ID_1514	0	1.08	2.5	2.39
	1	HS1BP3	ID_1518	0	0.11	0.87	1.07
	1	EPHA3	ID_1526	0	0	1.52	2.61
	1	TCTA	ID_1534	0	-0.25	0.39	1.11
	1	LOC440667 /// LOC440	ID_1543	0	-0.19	-0.03	2.61
	1	TRAPPC6A	ID_1548	0	0.16	1.08	2.03
	1	MGC13017	ID_1550	0	0.07	0.83	1.24
	1	PRG4	ID_1553	0	0.49	1.06	1.24
	1	EFHC1	ID_1566	0	1.36	1.92	2.73
	1	FLJ25967	ID_1567	0	1.01	1.23	1.79
	1	PLA2G6	ID_1572	0	-0.16	-0.1	0.94
	1	MGC13005	ID_1575	0	0.28	1.49	2.18
	1	PREP	ID_1580	0	0.27	1.08	1.67
	1	LOC202781	ID_1583	0	0.26	0.38	1.02
	1	BIRC3	ID_1599	0	2.05	2.87	4.61
	1	TMTC3	ID_1607	0	0.72	1.43	1.67
	1	TMTC2	ID_1609	0	0.15	1.08	2.19
	1	ARL15	ID_1634	0	1.17	2.09	2.48
	1	ARL14	ID_1636	0	0	0.04	1.5
	1	LOC283683 /// LOC646	ID_1640	0	0.45	1.85	2.06
	1	LOC652993	ID_1674	0	0.06	0.35	2.72
	1	DSCR1L1	ID_1677	0	1.74	3.3	3.31
	1	DNMT2	ID_1683	0	-0.06	0.58	1.57
	1	MGC13098	ID_1687	0	0.66	0.77	1.52
	1	SORL1	ID_1696	0	0.33	0.74	3.81
	1	ZADH1	ID_1728	0	-0.02	1.43	2.17
	1	NGFR	ID_1732	0	0	0.15	1.07
	1	COMMD6	ID_1737	0	-0.13	0.57	1.16
	1	IRF6	ID_1769	0	0.83	2.81	3.38
	1	IGFBP2	ID_1788	0	0.29	0.51	1.16
	1	WNT10B	ID_1820	0	0.38	0.31	1.03
	1	GGCX	ID_1835	0	0.44	1.14	1.74
	1	HADHB	ID_1855	0	0.43	1.02	1.44
	1	LOC255783	ID_1865	0	-0.24	0.79	2.02
	1	FLJ10159	ID_1889	0	0.4	0.64	1.01
	1	DFNB31	ID_1894	0	0.45	1.89	1.61
	1	CREG1	ID_1897	0	0.03	0.8	1.51
	1	PLEKHH1	ID_1904	0	0.02	1.37	1.78
	1	JMY	ID_1906	0	0.52	1.02	1.4
	1	PLEKHH2	ID_1909	0	2.11	3.35	3.4
	1	NIBP	ID_1913	0	0.09	0.65	1.43
	1	KIAA1815	ID_1914	0	0.03	1.28	2.28
	1	PLEKHG4	ID_1915	0	-0.31	0.51	1.54
	1	AKR7A2	ID_1963	0	0.15	0.73	1.07
	1	IRS2	ID_1968	0	0.32	0.41	1.32
	1	PSD3	ID_1972	0	0.88	1.07	1.72
	1	CCPG1	ID_1991	0	0.08	0.41	1.22
	1	HDDC3	ID_2001	0	-0.21	0.06	0.92
	1	MERTK	ID_2018	0	0.05	1.34	1.98
	1	CYB5R4	ID_2020	0	0.47	1.7	2.05
	1	CYB5R1	ID_2021	0	0.79	1.77	1.95
	1	RAB3IP	ID_2027	0	2.4	4.02	4.03
	1	RP11-217H1.1 /// LOC	ID_2028	0	0.3	0.7	1.14
	1	PCYOX1L	ID_2037	0	1.15	2.92	3.14
	1	CPSF3	ID_2045	0	0.09	0.88	1.02
	1	RNASE4	ID_2072	0	0.17	0.4	1.14
	1	POLR3GL	ID_2076	0	0.49	1.65	2.35
	1	LOC138255	ID_2094	0	0.5	3.42	4.09
	1	PITX2	ID_2104	0	-0.03	1.14	1.41
	1	HHLA3	ID_2115	0	0.05	0.26	1.3
	1	PFKFB2	ID_2120	0	0.35	1.1	1.79
	1	CDC37	ID_2124	0	0.34	0.8	1.07
	1	OSBPL9	ID_2134	0	0.46	1.03	1.46
	1	ABCG1	ID_2151	0	0.25	2.67	3.31
	1	ABCG2	ID_2153	0	1.49	3.5	4.62
	1	RNGTT	ID_2176	0	0.32	1.21	1.34
	1	CYB5A	ID_2194	0	0.47	1.62	2.28
	1	EPHX2	ID_2337	0	-0.01	0.12	1
	1	EPHX1	ID_2338	0	0.04	0.59	1.17
	1	COQ10A	ID_2358	0	1.35	2.84	2.74
	1	C20ORF19	ID_2366	0	0.2	0.48	1.01
	1	PSPH	ID_2369	0	-0.17	0.76	1.24
	1	C20ORF12	ID_2372	0	0.1	0.93	1.35
	1	ATP8B3	ID_2393	0	-0.12	-0.16	1.48
	1	RAB39B	ID_2399	0	-0.05	0.58	2.54
	1	PSME1	ID_2419	0	-0.01	0.49	1.12
	1	BTG1	ID_2421	0	-0.05	0.45	1.18
	1	NANOS1	ID_2436	0	0.69	3.01	4.94
	1	CYB5D2	ID_2474	0	-0.44	0.04	1.48
	1	LOC400684	ID_2488	0	0.08	0.34	2.22
	1	BSG	ID_2504	0	0.42	0.66	1.09
	1	VPS41	ID_2509	0	-0.22	0.63	1.32
	1	KIAA0672	ID_2545	0	-0.11	1.06	1.56
	1	USP15	ID_2571	0	0.6	1.13	1.26
	1	EGFL7	ID_2577	0	0.67	1.06	1.51
	1	RP11-82K18.3	ID_2591	0	-0.21	0.2	0.82
	1	SKIV2L	ID_2611	0	-0.05	1.09	1.95
	1	TXNL4B	ID_2629	0	0.57	1.07	1.34
	1	PLSCR4	ID_2636	0	0.38	0.81	1.23
	1	FOXE1	ID_2642	0	0.17	2.41	3.11
	1	USP49	ID_2644	0	2.03	2.9	3.56
	1	GAMT	ID_2645	0	-0.05	1.05	1.51
	1	USP45	ID_2649	0	0.25	0.95	1.09
	1	MICA	ID_2654	0	0.95	1.54	2.01
	1	API5	ID_2663	0	0.29	1.01	1.2
	1	MIA3	ID_2697	0	0.82	1.9	1.76
	1	TDRKH	ID_2700	0	0.89	4.36	4.67
	1	HACE1	ID_2709	0	0.14	0.89	1.21
	1	OGDHL	ID_2715	0	0.21	1.82	2.13
	1	LOC400642	ID_2736	0	0.32	0.78	1.63
	1	TBCD	ID_2745	0	0.34	0.81	1.19
	1	CA4	ID_2751	0	-0.02	0.34	1.25
	1	CCK	ID_2759	0	0.65	3.34	5.49
	1	VPS39	ID_2783	0	0.06	0.59	1.09
	1	CNNM2	ID_2785	0	0.54	2.48	2.77
	1	LOC643396	ID_2799	0	1.1	1.33	1.84
	1	ISL2	ID_2800	0	0.91	1.26	1.69
	1	SNTA1	ID_2809	0	0.15	0.91	1.4
	1	PNMA2	ID_2814	0	2.51	5.02	6.17
	1	HIBADH	ID_2820	0	0.15	1.01	1.99
	1	PLD3	ID_2844	0	0.01	0.33	1.01
	1	PLD1	ID_2849	0	0.6	2.16	3.15
	1	VTI1A	ID_2861	0	0.57	0.85	1.34
	1	CAMK4	ID_2864	0	0.32	1.3	1.11
	1	FBXL2	ID_2878	0	0.55	0.96	1.12
	1	LOC219854	ID_2879	0	-0.14	0.64	1.33
	1	FBXO2	ID_2905	0	0.03	1.7	2.75
	1	FDXR	ID_2906	0	0.06	0.85	1.01
	1	SEMA6A	ID_2914	0	0.33	1.5	1.55
	1	SEMA3C	ID_2950	0	0.21	0.92	1.98
	1	ATP6V0D1	ID_2954	0	0.21	1.14	1.13
	1	SEMA4F	ID_2982	0	0.05	1.4	1.79
	1	MAP3K13	ID_2989	0	0.7	1.33	1.93
	1	SEC15L2	ID_2993	0	0.22	1.57	2.18
	1	ATP6V0A1	ID_3021	0	1.61	2.24	2.43
	1	NIT1	ID_3028	0	0.5	1.41	1.69
	1	VGCNL1	ID_3059	0	-0.1	0.66	1
	1	GBP2	ID_3063	0	0.65	2.56	3.06
	1	FLJ40125	ID_3074	0	0.02	0.48	3.65
	1	LOC257396	ID_3085	0	0.05	1.21	2.26
	1	LOC646150	ID_3099	0	0.26	0.93	2.06
	1	UBL5	ID_3147	0	-0.06	0.38	1.13
	1	BA16L21.2.1	ID_3151	0	0.06	0.62	1.27
	1	BRE	ID_3161	0	-0.28	0.13	1.16
	1	KIAA0556	ID_3165	0	0.32	0.75	1.39
	1	STOML1	ID_3168	0	0.18	0.59	1.03
	1	PLS1	ID_3177	0	2.46	5.9	6.48
	1	IL1R2	ID_3192	0	-0.01	0.72	2.17
	1	PRO1073	ID_3195	0	0.5	1.03	1.42
	1	PLTP	ID_3206	0	-0.08	0.18	1.23
	1	KIAA0523	ID_3207	0	0.23	1.81	2.03
	1	ROGDI	ID_3216	0	0.1	1.27	1.55
	1	RABL2B /// RABL2A	ID_3230	0	0.11	1.03	1.64
	1	MINPP1	ID_3242	0	0.71	1.57	1.61
	1	MAST3	ID_3245	0	1.44	2.46	2.78
	1	MGC5618	ID_3252	0	0.45	0.84	1.47
	1	CCND2	ID_3253	0	0.28	2.05	2.83
	1	RP11-301I17.1	ID_3254	0	0.76	1.47	2.82
	1	MGC15523	ID_3255	0	0.11	0.43	1.06
	1	FLRT3	ID_3266	0	2.05	2.23	2.72
	1	IFRG15	ID_3303	0	0.84	1.08	1.25
	1	BMP2K	ID_3330	0	0.76	1.3	1.57
	1	ASTN2	ID_3336	0	0.52	1.88	2.25
	1	EXTL2	ID_3341	0	0.95	1.97	2.3
	1	PLK2	ID_3367	0	1.59	2.35	3.08
	1	SEL1L	ID_3372	0	0.51	1.13	1.3
	1	ANKS1A	ID_3398	0	0.79	1.28	1.51
	1	MGC9913	ID_3454	0	0.24	0.74	1.12
	1	CGA	ID_3459	0	0.71	1.75	3.32
	1	AQP3	ID_3473	0	1.76	3.99	4.03
	1	IFT20	ID_3481	0	0.15	0.66	1.5
	1	GAB1	ID_3484	0	0.68	1.09	1.16
	1	HRSP12	ID_3485	0	0.16	1.02	1.14
	1	CFD	ID_3494	0	2.42	3.85	4.31
	1	MIZF	ID_3527	0	0.91	0.99	1.18
	1	LOC643328	ID_3536	0	0.53	1.36	1.32
	1	PLAG1	ID_3540	0	0.41	0.7	1.24
	1	CFB	ID_3547	0	0.08	0.64	3.08
	1	COX6A1	ID_3560	0	0.12	0.73	1.38
	1	LOC646222	ID_3564	0	0.06	0.38	2.07
	1	CKB	ID_3571	0	1.37	2.65	2.7
	1	CHP	ID_3611	0	0.28	0.64	1.21
	1	IFT57	ID_3618	0	0.51	1.28	1.28
	1	IFT52	ID_3623	0	0.39	1.44	1.93
	1	ANKRD6	ID_3639	0	-0.02	1.76	2.15
	1	ANKRD5	ID_3643	0	0.21	1.88	1.71
	1	RNF32	ID_3656	0	0.22	2	2.79
	1	SNRPN	ID_3659	0	0.3	0.42	1.08
	1	CPE	ID_3670	0	0.04	1.5	3.46
	1	CPD	ID_3681	0	0.66	1.15	1.51
	1	RNF20	ID_3686	0	0.36	2.15	2.3
	1	CLU	ID_3691	0	0.93	3.29	4.91
	1	GALM	ID_3699	0	1.1	2.66	2.45
	1	HOXA5	ID_3709	0	0.41	0.58	3.28
	1	RNF13	ID_3721	0	0.76	1.39	1.59
	1	LOC653754	ID_3735	0	0.61	0.67	1.15
	1	ARHGAP6	ID_3763	0	0.82	3.15	3.14
	1	CTH	ID_3804	0	0.24	1.08	1.76
	1	CPM	ID_3813	0	0.4	2.27	2.36
	1	USP9X	ID_3816	0	0.46	1.22	1.77
	1	LOC554206	ID_3824	0	0.86	1.76	1.87
	1	PLAC1	ID_3834	0	0.03	0.31	2.44
	1	LOC653188 /// LOC653	ID_3844	0	-0.14	0.37	0.9
	1	UNC13B	ID_3884	0	0.04	0.88	1.52
	1	UNC13A	ID_3885	0	-0.08	0.61	3.54
	1	ARG2	ID_3895	0	1.14	2.68	3.28
	1	CXYORF10	ID_3905	0	0.26	0.34	1.61
	1	VPS8	ID_3931	0	0.3	1.57	2.15
	1	IL17RD	ID_3970	0	2.57	4.35	4.58
	1	RP11-125A7.3	ID_3976	0	0.22	1.13	1.94
	1	IFT122	ID_3977	0	0.27	0.93	1.49
	1	SYAP1	ID_4007	0	0.39	1.11	1.52
	1	MGC24125	ID_4012	0	0	0.1	1.44
	1	EBF1	ID_4027	0	-0.04	0.25	1.08
	1	FLJ13137	ID_4031	0	1.55	2.85	2.74
	1	CLDN6	ID_4042	0	0	0	1.05
	1	IFT80	ID_4056	0	0.73	1.8	2.16
	1	ARL6	ID_4058	0	0.48	1.75	1.98
	1	ARL3	ID_4061	0	0.15	0.91	1.34
	1	LTB4DH	ID_4065	0	-0.11	0.55	1.42
	1	IFT81	ID_4068	0	-0.03	0.36	1.02
	1	IFT88	ID_4072	0	0.41	1.47	1.82
	1	FKBP7	ID_4076	0	0.22	0.83	1.51
	1	GPSN2	ID_4109	0	0.01	0.64	1.38
	1	LOC651803	ID_4115	0	0.55	1.56	1.68
	1	PNKD	ID_4120	0	0.24	0.77	1.26
	1	SOHLH2	ID_4125	0	0.16	1.51	1.24
	1	GDF9	ID_4133	0	0	0	1.21
	1	VPS13A	ID_4134	0	0.76	1.61	2.47
	1	ATRNL1	ID_4142	0	0.1	1.03	1.88
	1	ARV1	ID_4162	0	0.71	1.48	1.53
	1	CLCN3	ID_4163	0	0.42	1.44	1.72
	1	FLJ10661	ID_4171	0	0.27	1	1.26
	1	TPD52L1	ID_4178	0	0.55	1.19	1.46
	1	CLCN4	ID_4196	0	0.11	3.23	4.6
	1	LOC201229	ID_4224	0	0.01	0.48	1.18
	1	SCAP	ID_4227	0	0.25	0.77	1.05
	1	FYCO1	ID_4249	0	0.32	1.48	2.25
	1	LOC344595	ID_4260	0	1.72	1.98	2.37
	1	F2RL1	ID_4271	0	2.07	2.3	2.71
	1	ASB5	ID_4304	0	0.94	1.54	2.36
	1	CORO2A	ID_4319	0	1.54	2.72	3.07
	1	ADIPOR1	ID_4361	0	-0.01	0.68	1.26
	1	KIAA0828	ID_4379	0	0.3	0.98	1.37
	1	SCG5	ID_4385	0	0.27	0.16	1.01
	1	SCG2	ID_4390	0	1.43	4.45	6.03
	1	EVI5L	ID_4403	0	0.54	0.99	1.03
	1	WDR78	ID_4421	0	1.97	2.07	2.81
	1	GBP5	ID_4438	0	0.3	1.72	1.53
	1	NME7	ID_4445	0	1.47	1.83	2.3
	1	NME5	ID_4449	0	1.85	4.36	5.07
	1	WDR52	ID_4466	0	0.12	2.16	2.13
	1	RAB7L1	ID_4478	0	0.68	1.09	1.14
	1	PCDH19	ID_4480	0	0.3	1.54	1.42
	1	WDR63	ID_4491	0	1.04	2.89	3.19
	1	WDR69	ID_4494	0	0.03	0.87	1.55
	1	NAP1L3	ID_4499	0	0.32	1.2	1.43
	1	NAP1L2	ID_4500	0	0.19	1.4	1.57
	1	WDR35	ID_4521	0	0.92	1.13	1.28
	1	SERTAD2	ID_4528	0	0.23	0.43	1.08
	1	WDR17	ID_4560	0	1.42	4.06	4.32
	1	LOC400566	ID_4575	0	0.19	0.62	1.21
	1	DDX25	ID_4611	0	0	0.32	1.25
	1	LOC646509	ID_4616	0	0.45	1.34	1.69
	1	LOC643011	ID_4676	0	0	0.98	1.67
	1	HDHD3	ID_4690	0	0.23	1.07	1.47
	1	EAF2	ID_4694	0	0.14	1.65	1.59
	1	GTF2A2	ID_4717	0	0.01	0.66	1.01
	1	SYBL1	ID_4735	0	-0.01	0.57	1.12
	1	SMUG1	ID_4752	0	-0.02	0.91	1.39
	1	SEC22A	ID_4755	0	0.34	1.2	1.52
	1	FBN2	ID_4760	0	0.24	0.67	1.58
	1	MORN2	ID_4767	0	0.21	1.17	1.88
	1	CLPTM1	ID_4772	0	0.32	0.9	1.28
	1	FLJ25006	ID_4777	0	0.58	1.47	1.34
	1	GCAT	ID_4784	0	0.45	0.89	1.39
	1	ZNRF1	ID_4787	0	0.09	0.71	1.15
	1	EMD	ID_4835	0	-0.13	0.65	1.03
	1	LOC63929	ID_4840	0	0.24	1.01	1.22
	1	FLJ14981	ID_4861	0	-0.09	0.82	2.31
	1	PLCL1	ID_4886	0	0	1.94	2.51
	1	FAT4	ID_4888	0	0.43	1.22	1.78
	1	SPATA4	ID_4893	0	0	0.86	2.48
	1	PLCE1	ID_4934	0	0.64	1.63	2.42
	1	CGNL1	ID_4942	0	0.55	4.7	5.32
	1	GCLC	ID_4946	0	1.46	2.44	3.37
	1	HTR7P	ID_4962	0	0.69	2.32	2.93
	1	UCP2	ID_4982	0	0.11	1.9	2.82
	1	PLCG2	ID_4983	0	0.56	2.81	2.75
	1	ACVR1C	ID_4993	0	0.26	1.16	1.09
	1	SBF1	ID_5014	0	0.1	0.91	1.58
	1	THYN1	ID_5029	0	0.05	1.42	1.68
	1	PLCD1	ID_5033	0	1.31	2.64	3.32
	1	GMCL1	ID_5042	0	1.37	1.94	2.18
	1	ATP6V0E2L	ID_5068	0	-0.18	1.02	2
	1	LOC254128	ID_5076	0	0.21	0.81	1.48
	1	L3MBTL	ID_5103	0	1.08	2.67	3.16
	1	KIAA1377	ID_5116	0	0.64	1.82	2.07
	1	RP11-78J21.1	ID_5117	0	0.5	0.65	1.01
	1	CD24 /// LOC647456	ID_5125	0	0.3	2.4	3.67
	1	MICA /// MICB	ID_5133	0	1.27	2.02	2.48
	1	GLCCI1	ID_5134	0	-0.1	0.62	1.26
	1	THEM2	ID_5136	0	-0.36	0.77	1.84
	1	KIAA1344	ID_5158	0	1.53	3.07	4.29
	1	LYPLAL1	ID_5161	0	-0.02	1.16	1.53
	1	ZNF770	ID_5171	0	0.11	0.72	1.01
	1	ATOX1	ID_5191	0	-0.16	0.59	1.47
	1	KIAA1324	ID_5192	0	0.06	0.42	1.83
	1	LOC653461	ID_5193	0	0.53	1.16	1.31
	1	CDKN2A	ID_5199	0	0.41	0.81	1.2
	1	DYX1C1	ID_5227	0	1.48	2.68	2.69
	1	FBXO16	ID_5233	0	0.02	0.88	1.7
	1	FBXO18	ID_5236	0	0.58	1.6	1.48
	1	FBXO15	ID_5239	0	-0.08	3.43	5.08
	1	MAMDC2	ID_5245	0	0.03	-0.11	1.21
	1	LOC645919	ID_5264	0	-0.08	1.45	3.18
	1	TMEM30A	ID_5275	0	0.38	0.85	1.27
	1	FBXO46	ID_5277	0	0.92	0.99	1.38
	1	PDZD6	ID_5285	0	0.61	2.29	3.14
	1	NMT2	ID_5288	0	0.57	1.28	1.51
	1	CDKN1C	ID_5289	0	0.83	1.3	1.37
	1	ATP7B	ID_5306	0	0.42	2.17	1.64
	1	PREX1	ID_5317	0	0.81	2.07	2.85
	1	TMEM38B	ID_5346	0	0.26	1.08	1.57
	1	SLC41A2	ID_5351	0	0.63	1.59	1.39
	1	APLP1	ID_5369	0	0.22	0.54	1.52
	1	GSTA4	ID_5385	0	-0.09	0.65	1.61
	1	KIAA0274	ID_5408	0	0.61	1.84	2.43
	1	DCTN3	ID_5428	0	0.01	0.66	1.15
	1	DCTN1	ID_5430	0	0.19	0.7	1.2
	1	ALDOC	ID_5439	0	0.43	1.89	3.27
	1	ZMAT2	ID_5474	0	0.23	0.75	1.14
	1	PMS2L5	ID_5476	0	0.61	1.01	1.58
	1	COX15	ID_5505	0	0.31	1.31	1.96
	1	FLJ31659	ID_5506	0	-0.12	0.2	0.89
	1	ATP5J	ID_5507	0	-0.11	0.3	0.98
	1	FLJ42957	ID_5569	0	1.47	2.37	3.95
	1	MRPS31	ID_5594	0	0.52	1.27	1.71
	1	CEP70	ID_5599	0	0.91	2.23	2.44
	1	C8ORF47	ID_5605	0	1.2	1.16	1.72
	1	C8ORF48	ID_5606	0	0.75	1.07	1.84
	1	C8ORF55	ID_5618	0	0.19	1.17	1.36
	1	COX6C	ID_5624	0	-0.12	0.4	0.99
	1	MRPS14	ID_5635	0	-0.05	0.4	0.99
	1	MRPS10	ID_5639	0	-0.17	0.32	1
	1	MRPS28	ID_5661	0	-0.09	0.23	0.92
	1	CRYZL1	ID_5695	0	0.45	1.34	1.98
	1	ARHGAP28	ID_5720	0	1.12	3.43	4.32
	1	SLC37A4	ID_5749	0	0.38	1.67	1.5
	1	C8ORF70	ID_5768	0	0.05	0.63	1.08
	1	LOC151878	ID_5781	0	0.73	1.23	1.63
	1	GNG7	ID_5807	0	0.25	1.4	3.43
	1	C3ORF15	ID_5835	0	0.04	0.49	1.91
	1	PIR	ID_5843	0	-0.51	-0.26	2.38
	1	LOC256273	ID_5850	0	0.19	0.7	2.09
	1	C3ORF26	ID_5856	0	0.03	0.98	1.55
	1	GPR85	ID_5874	0	0.43	1.53	1.96
	1	KIAA1217	ID_5919	0	1.26	2.05	2.16
	1	KIAA1212	ID_5925	0	0.47	1.06	1.42
	1	MYCBP2	ID_5941	0	0.16	0.77	1.14
	1	KIAA1244	ID_5958	0	0.04	0.42	1.63
	1	IQGAP2	ID_5994	0	0	1.74	4.51
	1	LOC652226	ID_6007	0	2.31	3.47	4.49
	1	NCAM1	ID_6019	0	1.82	3.68	4.39
	1	SEZ6L2 /// LOC652900	ID_6020	0	0.03	0.6	1.23
	1	SLC40A1	ID_6036	0	0.79	3.98	5.17
	1	CAMTA1	ID_6040	0	-0.17	0.32	0.83
	1	CAPS2	ID_6051	0	2.95	4.51	4.92
	1	B4GALT6	ID_6065	0	0	1.88	2.92
	1	CEND1	ID_6089	0	0.71	2.2	2.12
	1	PRDX1	ID_6097	0	0.08	0.6	1.44
	1	LOC653394	ID_6118	0	1.73	2.48	2.97
	1	PTHB1	ID_6120	0	-0.18	0.61	1.38
	1	ATP6V1A	ID_6123	0	0.91	1.65	1.61
	1	FLJ10781	ID_6166	0	2.35	4.19	4.53
	1	OXSM	ID_6168	0	-0.03	0.83	1.32
	1	DAG1	ID_6242	0	0.48	1.14	1.19
	1	LOC644480	ID_6252	0	0.29	0.97	1.38
	1	C6ORF114	ID_6262	0	0.33	0.6	1.34
	1	GMPR	ID_6313	0	1.39	2.75	3.06
	1	SUSD4	ID_6325	0	-0.02	0.32	1.15
	1	SUSD3	ID_6328	0	0	0.7	1.22
	1	SLC27A2	ID_6333	0	1.11	3.24	3.87
	1	KIAA0196	ID_6344	0	0.28	0.85	1.06
	1	BCAS3	ID_6352	0	-0.35	0.76	1.98
	1	EPPB9	ID_6358	0	-0.08	0.21	1.34
	1	MAPK11	ID_6368	0	0.36	1.26	1.25
	1	PYGL	ID_6376	0	0.44	1.1	1.19
	1	TUSC2	ID_6388	0	0.83	1.25	2.42
	1	TUSC4	ID_6391	0	0.66	1.51	1.52
	1	GSTM1	ID_6400	0	0.17	1.03	1.91
	1	GSTM2	ID_6402	0	0.28	1.17	2.1
	1	GSTM3	ID_6403	0	-0.19	0.59	1.32
	1	GSTM4	ID_6404	0	0.5	2.26	3.17
	1	CA12	ID_6411	0	0.96	1.45	1.66
	1	C6ORF199	ID_6437	0	0.33	2.43	2.95
	1	PPL	ID_6443	0	0.73	4.45	5.12
	1	STRBP	ID_6445	0	0.47	2.72	2.58
	1	C6ORF194	ID_6513	0	-0.01	0.13	1.17
	1	C3ORF39	ID_6519	0	0.08	1.66	2.23
	1	GSTO2	ID_6549	0	-0.31	0.62	1.55
	1	C6ORF162	ID_6556	0	0.97	1.92	2.75
	1	FAM50B	ID_6563	0	-0.06	0.81	1.97
	1	KIAA1128	ID_6607	0	0.05	0.98	1.47
	1	AQP11	ID_6614	0	0.78	2.08	2.81
	1	ZNF508	ID_6628	0	0.57	0.78	1.08
	1	OLFML2A	ID_6631	0	0.84	2.64	3.49
	1	KIAA1109	ID_6659	0	0.31	0.78	1.05
	1	C21ORF108	ID_6669	0	0.69	1.4	1.55
	1	ZNF512	ID_6671	0	0.48	1.31	1.59
	1	SSSCA1	ID_6696	0	0.32	0.95	1.12
	1	C21ORF119	ID_6704	0	0.06	1.16	2.89
	1	FGF9	ID_6732	0	1.94	2.32	3.35
	1	KARCA1	ID_6740	0	0.1	0.5	1.89
	1	KREMEN1 /// LOC64451	ID_6761	0	1.32	3.6	3.62
	1	ZNF550	ID_6787	0	0.55	1	1.09
	1	KIAA1155	ID_6807	0	0.07	1.79	1.89
	1	AFTIPHILIN	ID_6821	0	0.94	1.08	1.38
	1	IGBP1	ID_6873	0	0.03	0.5	1.01
	1	ZNF599	ID_6894	0	-0.15	0.56	1.58
	1	BCDO2	ID_6921	0	0.55	2.59	3.11
	1	C17ORF61	ID_6946	0	-0.16	0.88	1.87
	1	FLJ22795 /// LOC3881	ID_6978	0	1.14	1.72	1.96
	1	NSUN6	ID_6982	0	-0.02	0.33	1.04
	1	AYTL1	ID_6985	0	0.68	1.42	1.52
	1	FAM8A1	ID_6986	0	0.19	0.76	1.11
	1	DBC1	ID_7015	0	2.73	4.63	4.73
	1	LOC646762	ID_7022	0	-0.11	0.17	1.02
	1	GDF11	ID_7024	0	0.53	1.67	2.77
	1	DZIP3	ID_7035	0	0.55	2	3.1
	1	RPL26L1	ID_7056	0	-0.36	-0.01	0.89
	1	MATN2	ID_7062	0	0.22	0.78	1.4
	1	MATN3	ID_7065	0	0.15	1.06	0.89
	1	SYNJ2BP	ID_7075	0	0.24	0.92	1.59
	1	C1ORF136	ID_7100	0	0.35	1.23	1.77
	1	OLFM1	ID_7111	0	0.03	1.36	2.7
	1	C1ORF115	ID_7122	0	1.23	2.65	3.41
	1	C1ORF116	ID_7123	0	0.04	0.03	1.01
	1	LOC646848	ID_7124	0	0.05	1.14	2.16
	1	KCNJ10	ID_7145	0	0.01	1.28	1.92
	1	GPX3	ID_7165	0	0.72	2.76	4.4
	1	C1ORF142	ID_7175	0	0.41	1.01	0.93
	1	FAM89B	ID_7212	0	0.49	0.94	3.18
	1	LOC374491 /// LOC642	ID_7214	0	-0.04	0.31	1.04
	1	TEX15	ID_7233	0	-0.01	1.43	2.89
	1	KIAA0467	ID_7245	0	-0.26	0.32	0.99
	1	RANBP6	ID_7318	0	0.32	1.01	1.02
	1	MGC39821	ID_7322	0	0.15	1.84	3.84
	1	GPRC5A	ID_7354	0	1	3.54	3.93
	1	OXCT2	ID_7369	0	0.1	2.35	2.69
	1	LTA4H	ID_7398	0	0.54	1.53	2.18
	1	HIST1H2BI	ID_7418	0	-0.01	-0.15	1.46
	1	TIGD1	ID_7437	0	-0.02	1.32	1.49
	1	KIAA1005	ID_7474	0	0.68	1.29	1.23
	1	LOC653524	ID_7516	0	0	0.5	1.32
	1	RTN1	ID_7540	0	0	0	1.7
	1	RTN2	ID_7542	0	1.23	2.45	3.04
	1	RTN3	ID_7544	0	0.46	1.2	1.51
	1	LOC154761	ID_7557	0	0.86	1.29	1.66
	1	KIAA1018	ID_7561	0	0.23	1.09	1.33
	1	HIST1H2AG	ID_7588	0	1.15	2.78	4.8
	1	HIST1H2AD	ID_7589	0	0.67	-0.1	2.93
	1	HIST1H2AE	ID_7593	0	-0.06	0.38	3.06
	1	GPHN	ID_7609	0	0.16	0.91	1.03
	1	HIST1H2BC	ID_7619	0	1.02	0.52	2.77
	1	HIST1H2BD	ID_7620	0	0.32	0.58	2.87
	1	HIST1H2BF	ID_7624	0	0.14	-0.01	1.62
	1	HIST1H2BG	ID_7625	0	1.47	1.78	4.6
	1	HIST1H2BH	ID_7626	0	0.36	0.29	1.99
	1	ZNF664	ID_7641	0	0.76	1.11	1.42
	1	FLJ10986	ID_7642	0	-0.01	0.46	1.7
	1	HIST1H2AI	ID_7649	0	0.15	0.18	1.23
	1	HIST1H2AK	ID_7651	0	-0.03	0	1.54
	1	HIST1H2AJ	ID_7653	0	-0.05	-0.05	1.23
	1	HIST1H2AM	ID_7654	0	0.17	0.31	2.66
	1	RET	ID_7676	0	0.07	0.88	1.2
	1	LOC400927	ID_7682	0	0.06	0.36	1.01
	1	GPAM	ID_7758	0	0.89	1.32	1.47
	1	NEDD4L	ID_7782	0	1.67	1.93	2.69
	1	MIF4GD	ID_7795	0	-0.2	0.57	1.65
	1	SYT1	ID_7800	0	0.79	3.45	4.01
	1	KIF13B	ID_7827	0	1.15	3.12	2.9
	1	SUCLG1	ID_7833	0	0.19	0.79	1.14
	1	TBRG1	ID_7846	0	0.83	0.93	1.32
	1	BAI2	ID_7866	0	0.8	1.47	1.92
	1	FLJ37035	ID_7868	0	-0.09	1.82	2.17
	1	LCMT1	ID_7871	0	0.94	1.54	1.67
	1	LAMA1	ID_7888	0	0.3	1.07	1.93
	1	LAMA3	ID_7890	0	0.12	0.29	1.68
	1	LAMA5	ID_7893	0	0.37	0.75	1.26
	1	KIAA0367	ID_7901	0	0.81	4.03	4.31
	1	BAG4	ID_7908	0	0.72	1.31	1.38
	1	SLC25A4	ID_7922	0	0.9	2.43	2.5
	1	HERC5	ID_7932	0	0.86	3.34	2.82
	1	LOC646927	ID_7944	0	1.37	3.91	3.59
	1	CLDN10	ID_7952	0	0.07	-0.04	1.8
	1	CLDN11	ID_7953	0	1.32	3.35	4.05
	1	MLF1	ID_7959	0	1.84	4.51	4.58
	1	MLL3	ID_7999	0	0.37	0.77	1.5
	1	NQO2	ID_8002	0	0.81	1.84	1.85
	1	LOC283130	ID_8028	0	-0.01	0.07	1.04
	1	KIAA0363	ID_8030	0	0.07	0.48	1.29
	1	LOC646903	ID_8033	0	0.56	2.41	3.59
	1	DCXR	ID_8039	0	-0.13	0.69	1.13
	1	HPS5	ID_8048	0	0.42	1.25	1.29
	1	C21ORF109 /// LOC643	ID_8056	0	-0.04	0.13	1.99
	1	HPSE	ID_8058	0	1.02	4.34	5.29
	1	ABHD10	ID_8061	0	0.53	1.44	1.67
	1	ABHD13	ID_8062	0	0.55	0.85	1.08
	1	LOC645638 /// LOC650	ID_8067	0	0.16	1.13	4.11
	1	FAM70A	ID_8126	0	0	0	2.29
	1	KIAA1797	ID_8133	0	0.01	0.63	1.39
	1	KIAA1799	ID_8134	0	0.34	0.9	1.2
	1	RAB27B	ID_8147	0	0.52	1.24	2.27
	1	CYP1A1	ID_8154	0	0	0.06	2.35
	1	JUP	ID_8165	0	0.71	2.17	1.98
	1	CYP1B1	ID_8174	0	-0.2	2.57	3.25
	1	ARIH1	ID_8179	0	0.31	1.21	1.17
	1	DHX40	ID_8208	0	0.27	0.84	1.39
	1	ZNF347	ID_8224	0	0.13	1.07	1.25
	1	YBX2	ID_8232	0	0	0.44	2.05
	1	SPANXC	ID_8245	0	0.01	-0.02	1.07
	1	SLC22A5	ID_8247	0	0.44	0.88	1.11
	1	MRPL2	ID_8252	0	0.05	0.84	1.48
	1	ZNF334	ID_8276	0	-0.34	0.55	1.55
	1	LOC387790	ID_8281	0	0.6	1.12	1.38
	1	SF3B5	ID_8301	0	0.22	0.88	1.29
	1	PET112L	ID_8310	0	-0.29	0.02	0.73
	1	FMO4	ID_8311	0	0.02	0.24	1.18
	1	SORBS1	ID_8317	0	1.83	4.21	4.26
	1	PTX3	ID_8328	0	-0.24	0.48	2.17
	1	PAPSS1	ID_8329	0	0.8	1.83	2.14
	1	ANKHD1	ID_8343	0	0.69	1.01	1.38
	1	LRP6	ID_8366	0	1.26	1.72	1.88
	1	LRP4	ID_8377	0	1.02	1.1	1.53
	1	RNF141	ID_8392	0	0.5	1.19	1.21
	1	SAMD4B	ID_8403	0	1.01	1.4	2.13
	1	SMARCA3	ID_8435	0	0.76	1.62	1.6
	1	LRBA	ID_8443	0	0.41	2.12	2.76
	1	RNF167	ID_8466	0	0.07	0.55	1.13
	1	ZNF311	ID_8481	0	-0.12	0.19	0.9
	1	LAMP3	ID_8483	0	0.03	1.86	3.68
	1	RNF157	ID_8492	0	0	0.64	1.46
	1	SLC45A1	ID_8505	0	1.93	3.84	4.37
	1	SPINT1	ID_8525	0	0.24	1.52	2.43
	1	NRGN	ID_8528	0	0.88	2.53	3
	1	RNF123	ID_8544	0	0.08	0.51	1.04
	1	RNF128	ID_8551	0	1.34	3.74	4.14
	1	CD46	ID_8591	0	0.49	0.94	1.27
	1	CD55	ID_8671	0	0.39	0.67	1.03
	1	PTCD2	ID_8677	0	-0.05	1.59	1.81
	1	VWA1	ID_8709	0	0.15	1.48	1.71
	1	JPH1	ID_8710	0	0.67	2.06	2.92
	1	CCNI	ID_8717	0	-0.12	0.62	1.29
	1	CCNC	ID_8720	0	0.41	1.07	1.17
	1	RAD52	ID_8721	0	-0.1	0.6	1.29
	1	CXCL3	ID_8737	0	0	0.57	2.45
	1	GPM6B	ID_8742	0	1.07	1.65	1.98
	1	KIT	ID_8744	0	2.44	2.7	3.32
	1	CXCL6	ID_8745	0	-0.03	0.39	2
	1	CD24	ID_8762	0	0.35	1.85	2.75
	1	CD1D	ID_8783	0	0.28	2.53	3.04
	1	LOC115098	ID_8790	0	-0.22	0.4	1.04
	1	FGFR4	ID_8818	0	0.13	2.86	4.1
	1	ZZEF1	ID_8857	0	0.24	0.79	1.02
	1	ZC3H10	ID_8869	0	-0.27	0.26	0.95
	1	CD83	ID_8885	0	1.01	1.87	2.48
	1	PCYOX1	ID_8895	0	0.57	1.16	1.46
	1	GLIS3	ID_8896	0	0.07	-0.14	1.02
	1	HIBCH	ID_8918	0	0.58	1.47	1.96
	1	C15ORF48	ID_8921	0	1.48	3.17	4.35
	1	LOC441124	ID_8952	0	0.08	0.81	1.4
	1	SPAG9	ID_8956	0	0.96	2.3	2.08
	1	PUS3	ID_8965	0	0.93	2.17	2.21
	1	NPHP1	ID_8990	0	0.65	1.63	1.93
	1	DLEU1	ID_9027	0	1.11	2.12	2.67
	1	FLJ30092	ID_9029	0	0.55	1.11	1.26
	1	FMNL2	ID_9050	0	0.47	1.06	1.06
	1	FBXL20	ID_9058	0	0.47	0.88	1.07
	1	FLNC	ID_9070	0	1.04	1.91	1.91
	1	KIAA1622	ID_9071	0	1.11	2.65	2.53
	1	LOC653086 /// LOC653	ID_9108	0	1.12	1.42	1.58
	1	SLC44A3	ID_9131	0	0.08	2.48	4.21
	1	ZNF452	ID_9134	0	0.1	1.01	1.71
	1	LOC116349	ID_9229	0	0	0.92	1.16
	1	PURG	ID_9241	0	0.69	0.87	1.63
	1	CDK5	ID_9257	0	-0.12	0.9	1.55
	1	SLC12A2	ID_9297	0	0.64	1.17	1.19
	1	PITPNA	ID_9327	0	0.43	1.01	1.21
	1	SLC12A6	ID_9345	0	0.02	1.09	1.71
	1	EIF4EBP3 /// MASK-BP	ID_9353	0	0.67	1	1.22
	1	NOC3L	ID_9370	0	-0.04	0.83	0.98
	1	ZYG11B	ID_9413	0	0.38	1.21	1.27
	1	CDS1	ID_9427	0	2.53	4.75	4.8
	1	SLIT2	ID_9430	0	0.65	1.13	1.51
	1	CDON	ID_9463	0	1.01	3.96	3.69
	1	TIAM1	ID_9487	0	-0.02	1.81	2.89
	1	ZYG11BL	ID_9500	0	0.59	2.04	2.65
	1	C3ORF1	ID_9502	0	-0.04	0.74	1.38
	1	RIPK4	ID_9508	0	0.29	0.76	1.6
	1	LMBR1	ID_9511	0	0.74	2.24	2.71
	1	GABARAPL2	ID_9530	0	0.46	1.27	1.74
	1	TXNDC12	ID_9540	0	0.37	1.06	1.18
	1	AHCYL1	ID_9544	0	0.41	1.05	1.25
	1	ECHS1	ID_9585	0	0.07	0.86	1.26
	1	LOC644053	ID_9588	0	0.81	1.5	2.4
	1	CDYL	ID_9589	0	0.55	0.73	1.12
	1	TCP11L2	ID_9610	0	0.03	0.15	2.3
	1	TMEM144	ID_9623	0	0.02	0.03	1.43
	1	TMEM14B	ID_9631	0	0.17	0.61	1.32
	1	TMEM14A	ID_9634	0	0.46	1.54	2.14
	1	TMEM133	ID_9646	0	0.05	-0.03	1.13
	1	TMEM135	ID_9649	0	-0.09	0.79	1.51
	1	TMEM136	ID_9650	0	0.7	0.61	1.48
	1	ZCRB1	ID_9674	0	-0.18	0.3	0.9
	1	CHCHD7	ID_9680	0	1.35	2.25	2.51
	1	TMEM123	ID_9693	0	0.21	0.68	1.05
	1	TMEM118	ID_9714	0	1.3	4.31	4.85
	1	TMEM111	ID_9715	0	0.32	0.73	1.02
	1	ZNF117	ID_9724	0	0.28	1.37	1.57
	1	TMEM108	ID_9738	0	0.03	4.1	4.76
	1	C19ORF4	ID_9782	0	0.18	0.15	1.23
	1	ZNF177	ID_9784	0	-0.16	1.55	2.37
	1	ZSCAN21	ID_9791	0	0.26	1.12	1.42
	1	KIAA1598	ID_9824	0	-0.15	0.19	1.25
	1	C3 /// LOC653879	ID_9828	0	0.69	1.5	3.96
	1	CSNK2A2	ID_9829	0	0.59	0.76	1
	1	ME2	ID_9845	0	0.14	0.77	1.29
	1	KIAA1576	ID_9848	0	1.08	2.06	2.86
	1	FABP4	ID_9874	0	-0.12	1.41	3.57
	1	SLC13A3	ID_9876	0	0.28	0.88	2.94
	1	CASP6	ID_9890	0	1.17	2.02	2.74
	1	CASP9	ID_9898	0	0.29	1.03	1.08
	1	CNTN1	ID_9926	0	-0.01	0.98	3.69
	1	GDAP1	ID_9936	0	0.18	3.17	4.37
	1	MAF	ID_9945	0	0.98	1.13	1.67
	1	GMDS	ID_9947	0	-0.13	1.94	2.71
	1	C7ORF41	ID_9954	0	-0.03	0.74	1.9
	1	GLDC	ID_9977	0	0.08	0.53	1.98
	1	RAB26	ID_9994	0	0.35	2.16	3.33
	1	TMEM25	ID_10018	0	0.23	1.45	2.01
	1	GLCE	ID_10020	0	1.31	3.02	3.35
	1	C7ORF38	ID_10034	0	0.59	1.23	1.85
	1	RIMS3	ID_10054	0	0.51	3.91	3.53
	1	MLL	ID_10060	0	0.59	0.77	1.07
	1	PLA2G4A	ID_10065	0	0.31	3.29	3.66
	1	NIPSNAP1	ID_10069	0	-0.05	0.74	1.11
	1	TTLL5	ID_10087	0	0.24	0.86	1.01
	1	TTLL7	ID_10089	0	1.1	2.1	2.39
	1	RAB6B	ID_10102	0	0	0.9	1.19
	1	RHBDD1	ID_10115	0	-0.03	0.66	1.28
	1	RAB3D	ID_10139	0	1.06	2.72	3.1
	1	NLGN2	ID_10173	0	0.09	0.89	1.14
	1	C7ORF11	ID_10177	0	0.04	0.69	1.21
	1	C7ORF13	ID_10179	0	0	0.53	1.08
	1	RAB30	ID_10181	0	0.13	0.69	1.09
	1	CAST	ID_10192	0	0.24	0.72	1.21
	1	2014-09-04	ID_10194	0	0.12	1.26	1.97
	1	C6ORF203	ID_10205	0	0.36	1.19	1.08
	1	ZNF185	ID_10218	0	0.22	0.92	1.73
	1	KIAA0082	ID_10220	0	0.13	1.01	1.2
	1	SPA17	ID_10234	0	-0.28	1.09	2.16
	1	2014-09-06	ID_10250	0	1.19	1.69	1.8
	1	FXYD7	ID_10272	0	-0.06	2.63	4.64
	1	MUT	ID_10276	0	0.31	1.04	1.46
	1	GRTP1	ID_10301	0	1.21	2.95	2.8
	1	GM2A	ID_10315	0	0.38	1.34	2.25
	1	TMEM60	ID_10318	0	0.3	0.66	1.14
	1	TMEM178	ID_10323	0	-0.09	0.31	1.06
	1	TMEM175	ID_10327	0	0.1	0.58	1.17
	1	TMEM56	ID_10328	0	0.93	2.82	4.2
	1	TMEM16K	ID_10339	0	0.44	0.99	1.18
	1	TMEM67	ID_10358	0	0.58	1.17	1.21
	1	TMEM66	ID_10362	0	0.17	0.81	1.05
	1	TMEM69	ID_10363	0	-0.15	0.09	0.87
	1	ROPN1L	ID_10375	0	0.95	3.41	4.04
	1	GLRB	ID_10393	0	0.61	1.45	1.95
	1	LOC653193	ID_10398	0	1.16	3.32	3.64
	1	PAPLN	ID_10405	0	1.2	2.03	2.07
	1	TMEM160	ID_10416	0	-0.15	0.6	1.07
	1	MAPK8IP3	ID_10429	0	0.02	0.44	1.36
	1	MAPK8IP1	ID_10431	0	0.35	1.26	1.25
	1	C20ORF108	ID_10435	0	0.35	0.82	1.07
	1	FLJ42562	ID_10438	0	1.79	4.59	5.27
	1	CITED2	ID_10453	0	0.37	0.91	1.02
	1	C20ORF118	ID_10464	0	0.2	0.7	1.13
	1	SPIRE1	ID_10478	0	0.75	1.2	1.24
	1	SPIRE2	ID_10479	0	0.36	0.7	1.42
	1	LQK1	ID_10492	0	0.14	1.06	1.81
	1	KIAA1407	ID_10523	0	-0.11	0.33	1.71
	1	DHTKD1	ID_10562	0	0.23	0.76	1.27
	1	ZNF277	ID_10592	0	0.96	1.67	2.51
	1	FLJ39653	ID_10599	0	0.07	0.98	2.27
	1	PCSK1	ID_10612	0	0	0.11	1.19
	1	PLA2G12A	ID_10616	0	0.82	1.99	2.49
	1	PCSK5	ID_10624	0	0.87	1.5	1.49
	1	DGKH	ID_10642	0	0.26	0.4	1.26
	1	TSPAN7	ID_10683	0	-0.04	0.42	3.02
	1	C14ORF179	ID_10705	0	0.45	1.3	1.81
	1	KIAA1467	ID_10706	0	0.81	1.49	1.51
	1	KIAA1468	ID_10709	0	0.73	1.2	1.31
	1	STX8	ID_10717	0	-0.19	0.32	1.01
	1	STX7	ID_10719	0	0.59	1.24	1.25
	1	PCYT1B	ID_10733	0	0.29	1.18	1.45
	1	NIN	ID_10737	0	0.61	1.2	1.19
	1	ZNF204	ID_10761	0	0.48	1.99	1.68
	1	C13ORF24	ID_10832	0	0.26	1.28	1.33
	1	C13ORF31	ID_10849	0	0.57	2.06	2.41
	1	ASMTL	ID_10860	0	2.09	3.75	4.26
	1	C14ORF109	ID_10872	0	0.35	0.75	1.22
	1	C14ORF104	ID_10874	0	0.71	0.81	1.35
	1	C14ORF101	ID_10878	0	0.67	1.29	1.86
	1	C14ORF103	ID_10880	0	0.75	1.13	1.48
	1	KCNMB4	ID_10886	0	0.71	2.18	2.55
	1	OBFC2A	ID_10892	0	0.41	1.19	1.52
	1	DKFZP761I2123	ID_10926	0	0.45	1.58	1.37
	1	CBR4	ID_10959	0	1.04	2.26	2.81
	1	CBR1	ID_10983	0	-0.07	0.42	1.07
	1	C14ORF111	ID_10987	0	0.48	0.94	1.01
	1	NMU	ID_10991	0	0	0.03	1.11
	1	NLK	ID_10994	0	0.93	1.17	1.35
	1	C14ORF125	ID_11002	0	0.42	1.33	1.62
	1	C14ORF128	ID_11008	0	0.54	1.22	2.38
	1	LMAN2L	ID_11011	0	0.11	0.69	1.07
	1	PAQR5	ID_11061	0	1.52	2.6	2.68
	1	LOC283537	ID_11069	0	1.09	1.97	2.66
	1	CASC4	ID_11081	0	0.31	0.76	1.07
	1	ENDOD1	ID_11086	0	0.49	1.16	1.61
	1	CASC1	ID_11088	0	0.27	3.43	4.57
	1	SUOX	ID_11106	0	0.48	1.64	1.77
	1	RABL4	ID_11107	0	0.05	1.16	2.13
	1	RABL5	ID_11111	0	-0.1	0.65	1.06
	1	WBSCR19	ID_11116	0	1.12	1.47	2.02
	1	MPP7	ID_11123	0	0.77	4.35	4.37
	1	GALNTL1 /// LOC65375	ID_11161	0	0.24	2.87	3.14
	1	LPHN1	ID_11189	0	0.24	1.07	1.67
	1	FLJ20021	ID_11193	0	0.58	2.08	3.46
	1	MGC12966	ID_11226	0	0.5	2.09	2.1
	1	GLYATL1	ID_11295	0	0.09	0.43	2.28
	1	BEX1	ID_11322	0	0.67	2.39	3.86
	1	BEX2	ID_11323	0	2.17	4.86	5.7
	1	ISYNA1	ID_11328	0	0.12	0.59	1.39
	1	D4S234E	ID_11335	0	0.18	0.98	1.73
	1	CLSTN2	ID_11353	0	-0.01	0.1	1.07
	1	CLSTN3	ID_11354	0	0.79	1.5	1.99
	1	PGM2L1	ID_11378	0	0.88	1.56	1.66
	1	FRYL	ID_11384	0	0.37	1.27	1.41
	1	CTTNBP2NL	ID_11405	0	0.54	0.82	1.23
	1	SCPEP1	ID_11406	0	0.39	0.98	1.61
	1	MGC99813	ID_11432	0	0.27	1.19	1.41
	1	PIAS1	ID_11442	0	0.34	1.08	1.08
	1	RABEP1	ID_11490	0	0.19	1.05	1.29
	1	LOC374395	ID_11499	0	0.03	0.5	1.01
	1	C10ORF75	ID_11511	0	-0.03	0.37	1.15
	1	C10ORF54	ID_11515	0	0.79	1.53	1.83
	1	C10ORF58	ID_11520	0	0.46	1.72	2.59
	1	C10ORF61	ID_11528	0	0.2	0.79	1.49
	1	C10ORF46	ID_11535	0	0.68	0.92	1.29
	1	PBEF1	ID_11538	0	0.48	0.61	1.22
	1	AP2A1	ID_11577	0	0.23	0.85	1.34
	1	SLC25A27	ID_11614	0	2.2	3.66	4.68
	1	SLC25A39	ID_11644	0	0.11	0.73	1.45
	1	TMEM49 /// MIRN21	ID_11655	0	0.43	0.92	1.07
	1	EEF1A2	ID_11675	0	0.23	0.43	1.24
	1	LOC90110	ID_11679	0	1.12	1.43	1.62
	1	YIPF1	ID_11698	0	0.59	1.54	1.81
	1	XRCC6BP1	ID_11726	0	0.19	1.56	1.96
	1	TUBGCP6	ID_11754	0	0.18	0.64	1.29
	1	HMG20B	ID_11795	0	0.32	1.33	1.56
	1	FCHSD1	ID_11805	0	0.93	1.28	1.6
	1	ADAMTS3	ID_11807	0	0.77	1.18	3
	1	ACP6	ID_11817	0	-0.04	0.37	1.22
	1	ACN9	ID_11853	0	-0.02	1.28	2.49
	1	FLJ32312	ID_11870	0	0.27	0.78	1.61
	1	CKMT2	ID_11882	0	1.07	0.97	1.72
	1	LARGE	ID_11894	0	0.12	0.61	1.29
	1	LNX2	ID_11899	0	0.92	1.24	1.46
	1	NRCAM	ID_11903	0	0.35	0.66	2.73
	1	RLN2	ID_11912	0	0.01	0.97	2.95
	1	CCBL1	ID_11933	0	-0.13	0.38	1.21
	1	SYNGR2	ID_11971	0	0.09	0.77	1.02
	1	PPM1G	ID_11989	0	0.24	1.05	0.98
	1	PPM1D	ID_11992	0	0.12	0.74	1.22
	1	PPM1J	ID_11996	0	1.39	3.26	3.63
	1	PPM1K	ID_11999	0	0	0.78	1.01
	1	ATG4B	ID_12001	0	0.65	1.18	1.5
	1	ATG4A	ID_12004	0	0.25	0.99	1.09
	1	KIF9	ID_12010	0	0.64	1.09	1.47
	1	TSPAN33	ID_12016	0	0.1	0.97	2.2
	1	GCHFR	ID_12025	0	0.2	1.54	1.32
	1	GUCA1B	ID_12027	0	0.02	0.69	1.21
	1	SAMHD1	ID_12037	0	0.24	0.74	1.01
	1	GYG2	ID_12039	0	1.21	2.63	2.96
	1	SH3BGRL2	ID_12052	0	0.15	0.3	1.03
	1	SLA/LP	ID_12071	0	0.11	0.83	1.12
	1	NUDT16	ID_12073	0	0.27	0.94	1.67
	1	NUDT11	ID_12088	0	0.96	1.61	1.62
	1	FAM122C	ID_12102	0	0.22	1.46	2.04
	1	FAM121B	ID_12119	0	0.23	1.32	1.59
	1	FAM43B	ID_12123	0	0.17	1.54	1.5
	1	SLC15A2	ID_12136	0	0.36	1.22	1.3
	1	FAM44A	ID_12141	0	0.72	1.15	1.52
	1	PARC	ID_12153	0	-0.08	0.36	1.13
	1	ORMDL3	ID_12167	0	0.78	0.98	1.19
	1	FNDC1	ID_12185	0	0.06	0.5	2.15
	1	TNCRNA	ID_12195	0	0.89	1.28	1.46
	1	ITPR1	ID_12203	0	0.7	2.27	2.54
	1	ITPR2	ID_12205	0	0.14	1.07	1.15
	1	PAPOLG	ID_12214	0	0.35	1.03	1.09
	1	WFS1	ID_12220	0	0.88	1.87	1.72
	1	SOCS7	ID_12248	0	0.58	1.11	1.48
	1	TFB1M	ID_12263	0	0.42	1.3	1.77
	1	REEP6	ID_12280	0	1.68	4.48	5.65
	1	CSTF3	ID_12283	0	-0.02	0.23	1.17
	1	REEP1	ID_12291	0	0.46	3.58	4.02
	1	LOC196394	ID_12297	0	0.26	2.37	4.01
	1	HRASLS3	ID_12303	0	1.36	3.02	3.6
	1	PAK3	ID_12314	0	1.01	2.57	2.84
	1	MGC20983	ID_12321	0	0.19	0.77	2.23
	1	LOC147727	ID_12339	0	0.01	0.86	2.11
	1	LOC439911	ID_12352	0	1.14	1.54	2.39
	1	ACPL2	ID_12353	0	1.23	1.68	1.98
	1	DKFZP686P18101	ID_12378	0	0.27	1.71	2.14
	1	CYP2R1	ID_12411	0	0.71	2.31	2.79
	1	CYP2J2	ID_12417	0	0.09	0.44	1.08
	1	SPAG16	ID_12426	0	-0.19	0.6	1.86
	1	ST6GALNAC3	ID_12429	0	0	0.78	1.99
	1	SNPH	ID_12432	0	0.76	1.37	1.78
	1	PRSS35	ID_12437	0	0.66	1.27	1.89
	1	PGAP1	ID_12447	0	0.41	1.17	1.96
	1	SNRK	ID_12479	0	0.45	0.91	1.26
	1	PPP3CA	ID_12483	0	0.39	1.22	1.59
	1	LMLN	ID_12485	0	0.28	1.38	1.21
	1	ACSL3	ID_12487	0	1.4	2.18	2.23
	1	LMO4	ID_12517	0	-0.07	1.06	2.01
	1	ZXDC	ID_12518	0	0.28	0.94	1.01
	1	CIB2	ID_12527	0	-0.17	0.45	0.98
	1	LOC439994 /// LOC642	ID_12528	0	0.38	0.74	1.28
	1	MTUS1	ID_12530	0	1.29	1.68	1.98
	1	ANKRD13B	ID_12546	0	0.11	0.7	1.03
	1	TTC5	ID_12565	0	0.45	1.28	1.55
	1	TTC1	ID_12569	0	0.54	1.6	2
	1	R3HDM1	ID_12585	0	0.35	1.04	1.02
	1	CYP2S1	ID_12589	0	0.24	1.08	1.85
	1	DHRS2	ID_12616	0	0.57	5	5.31
	1	CYP2U1	ID_12621	0	0.9	2.37	3.09
	1	TNFSF9	ID_12638	0	1.28	2.08	2.53
	1	CYP3A5	ID_12647	0	-0.21	0.08	0.88
	1	SAP30L	ID_12656	0	0.23	1.02	1
	1	CHGN	ID_12662	0	0.03	1.68	3
	1	CHGB	ID_12667	0	0	0.33	2.55
	1	COASY	ID_12669	0	-0.12	0.45	1.02
	1	IFI30	ID_12673	0	1.08	2.33	3.36
	1	KLF9	ID_12685	0	-0.01	0.77	1.69
	1	HPCAL4	ID_12686	0	0	0.28	2.18
	1	PCNXL2	ID_12688	0	0.57	0.85	1.21
	1	AGPAT5	ID_12704	0	0.2	0.77	1.13
	1	G6PD	ID_12720	0	0.58	1.36	2.31
	1	FKBP1B	ID_12748	0	0.46	1.04	1.34
	1	CYP27B1	ID_12753	0	-0.32	-0.04	0.97
	1	MLLT3	ID_12769	0	0.45	1.75	2.52
	1	CHML	ID_12776	0	0.85	1.94	2.49
	1	SNX1	ID_12815	0	0.47	0.97	1.2
	1	RRAGD	ID_12818	0	0.41	1.07	1.43
	1	CYFIP2	ID_12840	0	1.52	3.18	3.56
	1	PRKCH	ID_12875	0	0.79	1.33	1.93
	1	UBE2H	ID_12878	0	0.69	1.01	1.36
	1	IMMP1L	ID_12884	0	0.45	1.45	1.67
	1	PRKCZ	ID_12908	0	0.03	1.25	1.27
	1	UBE4A	ID_12929	0	0.34	1.08	1.55
	1	TSLP	ID_12937	0	2.1	2.45	3.05
	1	SLC18A3	ID_12939	0	0	0.08	1.01
	1	LOC145758	ID_12949	0	0.42	0.69	1.22
	1	LOC283874	ID_12968	0	2.03	2.29	2.95
	1	KCNJ2	ID_12973	0	0.86	1.33	2.35
	1	LOC352909	ID_12979	0	1.35	3.62	3.37
	1	LACTB2	ID_12989	0	-0.09	1.01	1.59
	1	SYNE2	ID_12996	0	0.02	1.25	1.76
	1	TTC26	ID_13016	0	0.02	0.91	1.2
	1	AP1S3	ID_13023	0	1.32	3.44	3.65
	1	ZDHHC3	ID_13041	0	0.55	1.56	1.9
	1	NDUFA12	ID_13056	0	-0.14	0.54	1.19
	1	HIST2H2BE	ID_13061	0	1.11	1.76	3.3
	1	KCNH2	ID_13066	0	0.22	0.7	1.17
	1	CDC14B /// CDC14C	ID_13080	0	0.6	1.04	1.67
	1	KCNE1	ID_13089	0	1.05	3.92	4.36
	1	MT1E	ID_13090	0	0.27	1.13	1.49
	1	MT1H	ID_13094	0	0.12	0.75	1.27
	1	MT1G	ID_13097	0	0.12	0.9	1.65
	1	MT1F	ID_13098	0	0.07	0.85	1.43
	1	TTC13	ID_13103	0	0.44	1.3	1.5
	1	MT1M	ID_13106	0	0.13	0.87	1.29
	1	PRNPIP	ID_13108	0	-0.2	0.53	1.1
	1	TTC18	ID_13118	0	-0.04	0.65	2.25
	1	MT1X	ID_13119	0	0.09	0.69	1.21
	1	2014-03-02	ID_13123	0	-0.12	0.63	2
	1	PRKAR2B	ID_13152	0	1.28	2.33	2.31
	1	ELOVL7	ID_13158	0	0.18	3.26	3.98
	1	PCOLCE2	ID_13186	0	0.1	0.07	1.29
	1	BBS7	ID_13193	0	0.59	1.76	1.68
	1	LOC92270	ID_13207	0	-0.26	1.39	3
	1	TTBK2	ID_13210	0	1.04	1.72	2.05
	1	TTBK1	ID_13211	0	-0.05	0.1	1.09
	1	LOC129285	ID_13218	0	0.79	1.95	2.22
	1	HIVEP3	ID_13227	0	0.03	0.93	1.6
	1	ORC4L	ID_13234	0	1.08	1.67	1.72
	1	BBS1	ID_13254	0	0.03	0.41	1.18
	1	DKFZP564O0823	ID_13287	0	0	0.16	2.58
	1	C10ORF21	ID_13297	0	0.01	0.05	1.06
	1	AMDHD1	ID_13302	0	0	0.04	1.67
	1	FAM105A	ID_13316	0	1.2	2.05	2.42
	1	FER1L4	ID_13333	0	0.02	0.34	1.07
	1	ENPP5	ID_13336	0	0.97	6.05	7.77
	1	ENPP2	ID_13343	0	0.43	0.86	1.23
	1	ENPP4	ID_13345	0	-0.33	2.85	3.85
	1	FAM102B	ID_13350	0	0.97	1.27	1.4
	1	ZCCHC12	ID_13381	0	0.34	2.5	2.87
	1	ZCCHC11	ID_13384	0	0.77	1.18	1.41
	1	PIP5K3	ID_13394	0	0.96	1.49	1.63
	1	GNPTAB	ID_13399	0	0.13	0.82	1.56
	1	LASS6	ID_13433	0	0.45	1.1	1.08
	1	QDPR	ID_13443	0	-0.1	0.46	0.9
	1	KCNT2	ID_13454	0	0.1	0.39	1.48
	1	LRP11	ID_13457	0	0.33	0.85	1.24
	1	SOX4	ID_13467	0	0.8	1.27	2.6
	1	SOX9	ID_13473	0	0.41	0.32	1.1
	1	ENTPD3	ID_13485	0	0.04	0.91	1.32
	1	MGC13098 /// POLR2J2	ID_13493	0	0.59	0.3	1.5
	1	WDR7	ID_13494	0	0.35	1.65	1.5
	1	BBC3	ID_13504	0	0.14	0.46	1.38
	1	AMY1A /// AMY1B ///	ID_13524	0	0.25	0.86	1.39
	1	WNT16	ID_13537	0	1.99	3.59	3.68
	1	LOC124512	ID_13539	0	0.27	0.71	1.36
	1	MSH5	ID_13556	0	1.08	2.21	2.42
	1	WNT2B	ID_13562	0	0.81	1.32	2
	1	SLC17A7	ID_13563	0	-0.01	2.17	3.14
	1	KCNN2	ID_13576	0	1.42	2.22	2.51
	1	FLJ21839	ID_13599	0	-0.04	0.44	1.41
	1	ASCC2	ID_13613	0	0.17	0.85	1.41
	1	ROR1	ID_13617	0	0.57	1.41	2.14
	1	KBTBD3	ID_13630	0	1.06	2.2	2.9
	1	KBTBD6	ID_13631	0	0.53	1.06	1.74
	1	SPP1	ID_13640	0	1.06	1.5	1.65
	1	CCDC28A	ID_13678	0	1.36	2.04	2.4
	1	NFKBIZ	ID_13680	0	0.7	1.51	2.5
	1	MMP15	ID_13688	0	0.33	1.06	1.52
	1	MKNK1	ID_13705	0	1.54	2.72	3.19
	1	IGSF10	ID_13709	0	0.25	1.72	2.44
	1	NALP1	ID_13711	0	1.54	3.02	3.75
	1	SNAP25	ID_13718	0	1.6	2.87	3.17
	1	LOC348801	ID_13719	0	0.15	0.35	1.16
	1	SNRPD2	ID_13757	0	-0.22	0.26	0.83
	1	TGFB2	ID_13759	0	-0.3	0.2	1.49
	1	TFDP2	ID_13786	0	1.24	1.75	2
	1	UCN	ID_13790	0	0.23	0.65	1.33
	1	MYO1D	ID_13795	0	0.18	0.69	1.1
	1	LOC493754	ID_13805	0	0.52	2.3	3.59
	1	NBEAL1 /// ALS2CR16	ID_13810	0	0.55	1.11	1.48
	1	RTN4IP1	ID_13816	0	-0.09	1.11	1.54
	1	PRRG1	ID_13844	0	0.26	0.73	1.06
	1	CEP290	ID_13865	0	0.32	1.13	2.35
	1	KRT19	ID_13877	0	0.22	1.09	2.12
	1	IDH1	ID_13898	0	0.79	1.77	2.13
	1	NDFIP2	ID_13901	0	0.78	1.61	1.72
	1	DLX4	ID_13920	0	0.06	0.93	1.9
	1	COL21A1	ID_13925	0	-0.05	0.25	2.1
	1	VPS13D /// LOC654256	ID_13929	0	0.62	0.88	1.11
	1	KIAA1324L	ID_13935	0	-0.15	1.41	2.28
	1	UROS	ID_13946	0	-0.19	0.46	0.98
	1	MYO5C	ID_13953	0	0	1.3	3.03
	1	TES	ID_13954	0	0.11	0.36	1.15
	1	GRIA2	ID_13962	0	0	1.07	1.96
	1	TTN	ID_13975	0	0.86	1.95	2.09
	1	MYOCD	ID_13982	0	0.73	1	1.46
	1	IGSF8	ID_13992	0	0.62	1.85	2.53
	1	IGSF4	ID_13996	0	0.59	1.41	2.12
	1	IGSF3	ID_13997	0	0.27	2.53	3.38
	1	IGSF9	ID_14002	0	0.65	1.7	2
	1	LOH12CR1	ID_14011	0	-0.37	0.29	1.53
	1	ASRGL1	ID_14014	0	0.07	1.21	1.76
	1	IGSF4C	ID_14040	0	0.14	1.47	3.3
	1	ITIH5	ID_14057	0	0.42	1.12	2.2
	1	FILIP1	ID_14066	0	0.87	0.87	1.35
	1	C5ORF16	ID_14071	0	0.59	0.94	1.19
	1	ETNK1	ID_14096	0	0.45	1.37	1.33
	1	ETNK2	ID_14098	0	0.1	0.73	2.41
	1	ERCC2	ID_14103	0	0.11	0.66	1.2
	1	TRAPPC1	ID_14171	0	-0.23	0.08	0.8
	1	SURF1	ID_14174	0	0.14	0.89	1.35
	1	C6ORF12	ID_14197	0	0.55	1.26	1.43
	1	C9ORF18	ID_14203	0	0	0.1	1.5
	1	SYTL2	ID_14222	0	1.69	2.31	2.52
	1	LOC645469 /// LOC648	ID_14236	0	0.05	0.2	1.54
	1	MAN1A2	ID_14375	0	0.74	1.35	1.52
	1	MAN1A1	ID_14380	0	0.43	1.31	1.97
	1	RP11-529I10.4	ID_14385	0	0.02	0.54	1.33
	1	DNER	ID_14396	0	0.8	5.61	7.1
	1	INPP5F	ID_14399	0	1.3	2.31	2.82
	1	MAN1C1	ID_14409	0	0.43	3.1	3.23
	1	FLJ44606	ID_14413	0	0.31	0.67	1.52
	1	PRRT3	ID_14434	0	-0.27	0.74	1.52
	1	FOXO1A	ID_14458	0	1.6	2.02	2.45
	1	LOC644872	ID_14509	0	0.69	0.8	1.07
	1	SNAPC1	ID_14513	0	1.65	2.68	3.57
	1	PCMT1	ID_14554	0	0.09	0.89	1.03
	1	FLJ35767	ID_14558	0	0	0.06	1.29
	1	SGK	ID_14559	0	0.49	1.41	1.35
	1	TBC1D19	ID_14569	0	-0.03	0.5	1.22
	1	TBC1D16	ID_14574	0	0.44	1.49	1.34
	1	MYO6	ID_14586	0	0.66	1.22	1.18
	1	FLJ32810	ID_14649	0	0	-0.01	1.14
	1	SST	ID_14656	0	-0.29	6.85	8.73
	1	C9ORF72	ID_14664	0	1.02	1.49	1.7
	1	C9ORF116	ID_14675	0	0.5	2.18	2.26
	1	C9ORF119	ID_14677	0	-0.02	0.82	1.3
	1	GARNL1	ID_14685	0	-0.03	0.64	1.36
	1	C9ORF127	ID_14713	0	-0.05	0.78	2.31
	1	ALDH7A1	ID_14719	0	-0.03	0.62	1.31
	1	SEPT6 /// N-PAC	ID_14720	0	0.88	1.65	1.87
	1	LOC123688	ID_14722	0	0	0.03	1.34
	1	C9ORF53	ID_14730	0	0.13	1.5	1.85
	1	LIPA	ID_14763	0	1.03	2.26	2.75
	1	FLJ44796	ID_14806	0	0.22	1.12	1.7
	1	ABAT	ID_14833	0	3.16	5.65	6.09
	1	DOK5	ID_14884	0	0.56	1.37	1.32
	1	DISP2	ID_14902	0	0.07	2.39	3.31
	1	STIM2	ID_14929	0	0.48	0.63	1.01
	1	LIAS	ID_14953	0	0.55	1.29	2.11
	1	SYT11	ID_14958	0	0.6	1.72	2.67
	1	SKAP2	ID_14980	0	-0.07	1.1	2.01
	1	HISPPD2A /// LOC6499	ID_14984	0	0.68	1.08	1.27
	1	MAN2B1	ID_14985	0	0.12	0.65	1
	1	PRPF4	ID_14990	0	0.46	1.23	1.17
	1	MED31	ID_15013	0	0.25	0.59	1.06
	1	ABP1	ID_15015	0	0.85	1.07	1.24
	1	DENND4A	ID_15017	0	0.84	1.62	1.82
	1	F11R	ID_15028	0	4.04	6.65	6.7
	1	RND2	ID_15036	0	0.15	0.86	1.86
	1	C4ORF14	ID_15060	0	0.86	1.45	1.97
	1	C4ORF12	ID_15068	0	-0.1	0.46	2.24
	1	LOH11CR2A	ID_15101	0	1.05	3.1	4.4
	1	C4ORF30	ID_15103	0	1.07	1.46	1.85
	1	C4ORF32	ID_15105	0	0.49	1.1	1.48
	1	C4ORF31	ID_15106	0	0.12	1.59	2.57
	1	GOLGA7	ID_15109	0	0.35	0.87	1.13
	1	C4ORF36	ID_15110	0	0.02	0.33	1.12
	1	ZBTB25	ID_15130	0	0.42	0.34	1.44
	1	LOC340109	ID_15150	0	0.2	2.14	4.5
	1	C4ORF29	ID_15153	0	0.18	0.98	1.23
	1	ZBTB11	ID_15160	0	0.45	1.08	1.5
	1	CETN2	ID_15163	0	-0.01	0.69	1.54
	1	PEX16	ID_15171	0	0.51	0.96	1.22
	1	C6ORF52	ID_15215	0	-0.07	0.57	2.18
	1	ALDH6A1	ID_15231	0	0.51	1.58	2.73
	1	ITGB8	ID_15282	0	0.18	1.73	2.69
	1	ITGA7	ID_15314	0	1.08	2.26	3.1
	1	IFI6	ID_15325	0	0.18	0.52	1.19
	1	CCDC39	ID_15335	0	0.48	0.92	1.22
	1	NSBP1	ID_15336	0	0.32	0.51	1.32
	1	CCDC52	ID_15368	0	0.71	1.68	1.75
	1	MXI1	ID_15426	0	1.18	1.54	1.95
	1	MGC72104	ID_15428	0	0.97	1.09	1.33
	1	ITFG3	ID_15433	0	-0.05	0.78	1.39
	1	CCDC131	ID_15442	0	0.52	0.62	1.19
	1	CCDC98	ID_15462	0	0.11	0.62	1.14
	1	MANSC1	ID_15469	0	-0.09	0.2	1.38
	1	TNNI3	ID_15489	0	0.26	1.62	3.43
	1	CLGN	ID_15492	0	0.4	3.08	4.29
	1	DYNLL2	ID_15501	0	0.43	0.89	1.17
	1	CLN5	ID_15525	0	-0.05	0.36	1.14
	1	DPM1	ID_15549	0	0.91	1.47	1.76
	1	NUDT6	ID_15591	0	0.76	1.87	2.16
	1	FLJ31438	ID_15593	0	0.05	0.94	1.53
	1	PAR5 /// SNORD108 //	ID_15627	0	-0.04	0.06	1.13
	1	DPH5	ID_15640	0	-0.24	0.19	0.87
	1	AKR1C3	ID_15647	0	0.06	1.7	3.29
	1	CLUL1	ID_15656	0	-0.57	0.43	2.33
	1	LPIN1	ID_15665	0	1.1	1.28	1.61
	1	ZFYVE27	ID_15671	0	0.59	0.95	1.15
	1	CKMT1B /// CKMT1A	ID_15672	0	0	1.79	4.35
	1	ZFYVE28	ID_15674	0	0.45	0.76	1.7
	1	AAMP	ID_15675	0	0.22	1.11	0.99
	1	UCHL3	ID_15677	0	0.23	1	1.11
	1	LOC389830 /// LOC389	ID_15686	0	-0.17	0.37	0.88
	1	TSPYL5	ID_15689	0	0.49	2.01	2.35
	1	PAFAH1B3	ID_15709	0	0.18	1.05	0.79
	1	MTHFD2L	ID_15714	0	-0.24	0.49	1.58
	1	CCDC113	ID_15732	0	0.01	1.33	2.03
	1	RKHD3	ID_15740	0	0.53	1.22	1.37
	1	MRPL40	ID_15741	0	-0.27	0.39	1.43
	1	LYPD3	ID_15748	0	0.42	0.63	2.04
	1	LYPD6	ID_15749	0	0.51	1.24	1.12
	1	H-PLK	ID_15770	0	0.01	0.12	1.45
	1	LOC388152 /// LOC388	ID_15784	0	1.12	1.31	1.64
	1	MRPL55	ID_15794	0	0.51	0.95	1.31
	1	ARFIP1	ID_15811	0	0.27	1.29	1.36
	1	TSEN2	ID_15826	0	-0.08	0.29	0.97
	1	AASS	ID_15845	0	1.11	2.16	2.43
	1	UNQ501	ID_15872	0	0.31	1.47	2.41
	1	LGMN	ID_15883	0	0.32	0.9	1.19
	1	LOC286052	ID_15905	0	0.28	1.05	1.53
	1	TNNT1	ID_15914	0	-0.01	0.51	1.88
	1	ZFAND6	ID_15918	0	0.36	1.07	0.98
	1	KIAA2013	ID_15930	0	0.51	0.93	1.21
	1	B3GNT1	ID_15940	0	0.7	0.88	1.46
	1	UST	ID_15946	0	0.74	1.36	1.4
	1	TPP2	ID_15970	0	0.6	1.13	1.1
	1	LOC150271	ID_15976	0	2	2.71	3.29
	1	TPPP	ID_15989	0	0.67	2.6	2.86
	1	PPP1R12B	ID_15993	0	0.4	1.04	1.26
	1	LOC641807	ID_16003	0	0.74	0.53	1.55
	1	IKBKAP	ID_16045	0	0.32	1.03	1.32
	1	FAM19A4	ID_16063	0	0	1.12	1.87
	1	KAL1	ID_16072	0	0.33	0.98	1.29
	1	DUSP16	ID_16073	0	-0.28	0.83	1.84
	1	ALDH4A1	ID_16075	0	0.3	1.3	2.06
	1	CYP46A1	ID_16077	0	1.41	3.06	3.59
	1	HBA2	ID_16084	0	0.11	2.31	4.91
	1	HBA1	ID_16085	0	0.37	1.92	3.38
	1	PRPSAP2	ID_16087	0	0.67	1.3	1.62
	1	FLJ20920	ID_16102	0	0.96	2.14	2.58
	1	ABCB1 /// ABCB4	ID_16109	0	1.23	2.63	2.62
	1	AMPH	ID_16134	0	1.56	3.2	3.11
	1	LOC220930	ID_16135	0	0.61	1.63	2.82
	1	LOC338758	ID_16143	0	0.68	1.72	2.71
	1	SDHA	ID_16147	0	0.38	1.02	1.28
	1	SDHD	ID_16155	0	0.08	0.8	1.1
	1	DPYD	ID_16160	0	0.23	1.08	0.94
	1	PACSIN1	ID_16173	0	0.05	0.65	1.95
	1	ANG /// RNASE4	ID_16194	0	-0.02	0.65	1.02
	1	DKFZP762H185	ID_16197	0	2	2.6	2.98
	1	SDF2	ID_16207	0	0.24	0.98	1.01
	1	SSBP2	ID_16247	0	0.92	1.65	1.75
	1	TMC4	ID_16274	0	0.29	1.58	2.96
	1	HS2ST1	ID_16293	0	0.69	1.58	1.48
	1	PELI2	ID_16298	0	0.59	0.76	1.34
	1	HERC2P2 /// LOC44024	ID_16318	0	0.31	1.27	1.72
	1	RBP7	ID_16326	0	0.18	1.04	2.33
	1	SAA1 /// SAA2	ID_16334	0	-0.01	0.16	1.13
	1	GPR155	ID_16351	0	1.34	1.93	2.4
	1	ZFP95	ID_16362	0	0.03	0.97	1.12
	1	OASL	ID_16366	0	0.12	0.92	1.33
	1	GPR160	ID_16373	0	0.06	2.08	3.54
	1	ZFP36	ID_16388	0	0.75	1.22	1.49
	1	COG5	ID_16417	0	0.22	0.87	1.25
	1	COG2	ID_16428	0	0.47	0.99	1.52
	1	PRKCB1	ID_16436	0	0.04	0.47	1.94
	1	MKRN2	ID_16438	0	0.57	0.93	1.02
	1	PDGFD	ID_16451	0	-0.24	1.12	3.17
	1	SREBF1	ID_16481	0	1.14	2.13	2.94
	1	C2ORF49	ID_16491	0	0.11	0.55	1.25
	1	PCBP3	ID_16504	0	0.21	1.19	1.42
	1	C16ORF51	ID_16541	0	-0.21	0.48	1.19
	1	C16ORF57	ID_16548	0	0.85	1.84	2.01
	1	GPR108	ID_16552	0	-0.14	-0.12	0.9
	1	DNAH7	ID_16565	0	0.24	1.18	1.3
	1	NPTX2	ID_16578	0	0.25	1.97	1.86
	1	SH3BGR	ID_16631	0	-0.29	1.31	2.56
	1	GNAI1	ID_16659	0	0.65	1.19	1.49
	1	SGK3 /// C8ORF44	ID_16692	0	0.58	0.5	1.27
	1	LOC642351	ID_16710	0	0.05	0.25	1.12
	1	CCDC109A	ID_16724	0	0.29	1.2	1.17
	1	CCL20	ID_16744	0	-0.19	4.13	6.85
	1	RPS6KA2	ID_16781	0	0.78	1.69	1.99
	1	LOC389834 /// LOC642	ID_16784	0	0.07	0.37	1.15
	1	LRIG2	ID_16822	0	0.05	1.36	1.37
	1	TRADD	ID_16849	0	0.16	0.62	1.05
	1	DOCK4	ID_16850	0	1.84	3.42	4.07
	1	HSD11B1L	ID_16862	0	-0.16	0.64	1.49
	1	ALDH3A2	ID_16884	0	0.91	2.04	2.1
	1	CBARA1	ID_16896	0	0.42	1.37	1.77
	1	PHC1 /// LOC653441	ID_16900	0	0.13	0.38	1.35
	1	EFNA3	ID_16913	0	1.78	3.39	3.84
	1	RFXAP	ID_16914	0	0.17	0.9	1.02
	1	EFNB3	ID_16920	0	1.41	3.12	4.11
	1	DKFZP434I0714	ID_16933	0	0	0.58	2.16
	1	PDGFRL	ID_16939	0	1.47	3.47	3.41
	1	HOXA13	ID_16945	0	-0.34	-0.08	2.06
	1	PIN1	ID_16954	0	0.36	1.31	1.55
	1	GPD1L	ID_16955	0	0.19	1.1	1.33
	1	GSDML	ID_16963	0	2.36	3.08	3.55
	1	BMP4	ID_16965	0	1.21	2.38	3.43
	1	ELMOD1	ID_17022	0	2.6	4.6	4.6
	1	CNFN	ID_17031	0	0	0.3	1.02
	1	LYNX1	ID_17051	0	-0.03	0.32	1.43
	1	MFAP3L	ID_17063	0	0.78	1.9	1.8
	1	PIGL	ID_17074	0	0.17	0.79	1.75
	1	PIGM	ID_17075	0	0.62	1.39	1.69
	1	PIGF	ID_17076	0	0.13	1.41	1.79
	1	PIGH	ID_17081	0	0.2	1.21	1.42
	1	PIGN	ID_17108	0	0.48	1.41	1.97
	1	LOC51035	ID_17116	0	0.29	0.79	1.11
	1	PPP2R5A	ID_17141	0	-0.21	0.27	0.88
	1	KIF5C	ID_17163	0	1.52	4.81	5.67
	1	C1ORF88	ID_17180	0	0.06	0.78	1.32
	1	RAB9	ID_17190	0	0.46	0.9	1.03
	1	C1ORF57	ID_17196	0	-0.19	0.7	1.46
	1	LOC56755	ID_17199	0	0.77	1.07	1.23
	1	LOC56757	ID_17214	0	0.44	1.27	1.7
	1	PPP2R2B	ID_17217	0	0.46	1.79	2.91
	1	SERPINI1	ID_17227	0	0.92	3.46	4.95
	1	C1ORF66	ID_17234	0	0.23	1.42	2.43
	1	BTBD11	ID_17248	0	1.05	3.31	3.29
	1	SERPINA5	ID_17261	0	0.18	0.1	1.3
	1	RABGAP1	ID_17305	0	0.49	1.28	1.11
	1	NUFIP1	ID_17308	0	0.54	1.05	1.15
	1	C1ORF97	ID_17320	0	-0.24	0.93	2.41
	1	LSMD1	ID_17338	0	-0.19	0.42	1.19
	1	HBS1L	ID_17340	0	0.03	0.71	1.37
	1	TUBG2	ID_17347	0	-0.19	0.57	1.31
	1	LOC642405	ID_17371	0	0	0.6	2.6
	1	C1ORF37	ID_17373	0	0.03	0.69	1.18
	1	PEX11G	ID_17378	0	0.06	0.37	1.16
	1	SPRY1	ID_17389	0	0.03	0.49	1.33
	1	OCA2	ID_17393	0	-0.16	2.06	2.67
	1	FLJ23867	ID_17420	0	0.3	0.26	1.1
	1	CRLF1	ID_17429	0	0.59	1.42	1.98
	1	C1ORF26	ID_17441	0	0.46	0.9	1.36
	1	SCRN3	ID_17448	0	0.18	1.11	1.38
	1	DKFZP686M0199	ID_17455	0	0.5	1.42	1.49
	1	SRD5A2L	ID_17463	0	-0.19	0.08	0.86
	1	AOF1	ID_17470	0	1.11	2.64	2.71
	1	KIFAP3	ID_17480	0	0.39	1.16	1.42
	1	LOC619208	ID_17511	0	-0.08	1.23	2.3
	1	PHKB	ID_17527	0	-0.09	0.41	1.04
	1	TUBB4	ID_17540	0	0	0.02	1.4
	1	ICAM4	ID_17542	0	0.13	0.46	1.28
	1	ICAM2	ID_17544	0	-0.09	0.21	1.11
	1	EDEM2	ID_17558	0	-0.1	0.55	1.44
	1	MBOAT5	ID_17576	0	0.77	1.77	2.47
	1	MBOAT2	ID_17585	0	0.47	1.05	1.23
	1	OCLN	ID_17594	0	1.48	3.64	3.27
	1	ROBO1	ID_17605	0	0.43	1.19	1.57
	1	DYNLRB2	ID_17621	0	0	0.29	3.19
	1	ACTR3B	ID_17624	0	0.41	0.69	1.07
	1	LMTK3	ID_17633	0	0.8	1.44	2.13
	1	PHF3	ID_17637	0	0.65	0.81	1.03
	1	AGTPBP1	ID_17655	0	0.99	1.99	2.47
	1	POU4F1	ID_17668	0	0.02	1.03	1.33
	1	PHC1	ID_17669	0	0.38	0.57	1.02
	1	AOC3	ID_17684	0	0.14	0.36	1.12
	1	SIRT4	ID_17692	0	0.63	1.74	1.82
	1	POLR2J2 /// LOC44125	ID_17705	0	0.88	0.95	1.8
	1	LOC339929	ID_17709	0	0	0	1.42
	1	SELENBP1	ID_17715	0	0.52	1.61	2.56
	1	KIAA0319L	ID_17718	0	0.05	0.76	1
	1	C14ORF1	ID_17719	0	0.37	1.57	2.14
	1	INTS8	ID_17724	0	0.32	1.07	0.89
	1	INTS5	ID_17726	0	0.87	1.07	1.33
	1	INTS4	ID_17729	0	0.09	0.52	1.31
	1	ERBB3	ID_17756	0	1.64	2.79	2.85
	1	PPP1R3C	ID_17761	0	1.52	2.11	2.92
	1	TLL2	ID_17775	0	0.01	1.66	3.41
	1	TLE1	ID_17793	0	1.05	1.56	1.64
	1	PFDN6	ID_17799	0	0.29	0.78	1.23
	1	C1QL1	ID_17802	0	0.14	1.42	2.01
	1	LOC648768	ID_17803	0	-0.24	0.22	0.93
	1	HSD17B4	ID_17815	0	0.08	0.65	1.22
	1	GALNT12	ID_17817	0	1.53	3.72	4.1
	1	HSD17B8	ID_17820	0	-0.02	0.78	2.12
	1	PPP1R10	ID_17826	0	-0.14	0.04	0.97
	1	ANK2	ID_17853	0	-0.01	0.4	1.13
	1	ANK3	ID_17854	0	0	0.22	1.02
	1	TNFAIP2	ID_17874	0	0.25	0.2	1.71
	1	OAZ2	ID_17881	0	0.48	0.97	1.02
	1	CPA4	ID_17889	0	1.66	6.4	7.37
	1	NGFRAP1L1	ID_17943	0	0	0.61	3.08
	1	PGS1	ID_17958	0	0.36	0.65	1.05
	1	COL4A5	ID_17983	0	0.24	1.14	1.55
	1	PPP1R9A	ID_17987	0	0.16	1.83	1.56
	1	SIN3A	ID_17997	0	0.49	0.96	1.11
	1	C12ORF60	ID_18010	0	0.82	2.82	3.8
	1	CKMT1A	ID_18046	0	0.33	1.08	1.69
	1	TM7SF2	ID_18049	0	1.8	4.05	5.16
	1	C12ORF31	ID_18055	0	0.47	0.75	1.03
	1	ANKRD29	ID_18082	0	0.25	0.64	1.35
	1	PRUNE	ID_18083	0	0.67	1.4	1.4
	1	YPEL2	ID_18103	0	1.26	1.48	1.93
	1	SPESP1	ID_18105	0	0.22	1.1	1.55
	1	C12ORF47	ID_18124	0	0.13	0.46	1.09
	1	ANKRD37	ID_18128	0	0.12	-0.05	0.97
	1	SPSB3	ID_18139	0	0.81	1.24	1.36
	1	ANKRD49	ID_18159	0	0.48	0.7	1.17
	1	C12ORF39	ID_18160	0	0	0.04	1.22
	1	LOC163131 /// LOC284	ID_18201	0	0.66	0.99	1.24
	1	C12ORF11	ID_18208	0	0.56	1.49	1.89
	1	NDRG3	ID_18209	0	0.05	0.59	1.14
	1	NDRG4	ID_18211	0	0.3	1.14	1.43
	1	NDRG1	ID_18213	0	0.32	0.77	1.42
	1	TLN2	ID_18224	0	0.32	1.38	1.78
	1	GALNTL4	ID_18226	0	0.5	1.22	1.39
	1	DKFZP586P0123	ID_18227	0	0.08	1	1.29
	1	CTA-221G9.4	ID_18236	0	0.58	1.63	1.87
	1	RPIB9	ID_18237	0	1.46	3.79	4.31
	1	NDUFB3	ID_18241	0	0.11	0.81	1.54
	1	SBNO1	ID_18243	0	0.71	1.12	1.24
	1	NDUFB6	ID_18246	0	-0.09	0.4	0.93
	1	NDUFA2	ID_18260	0	0.23	0.97	1.39
	1	NDUFA8	ID_18262	0	0	0.81	1.22
	1	NDUFA7	ID_18268	0	-0.31	0.01	0.94
	1	MAP3K8	ID_18289	0	0.68	0.7	1.24
	1	AIG1	ID_18299	0	0.05	0.64	1.14
	1	AQR	ID_18306	0	0.56	1.12	1.17
	1	LOC130940	ID_18308	0	1.52	3.48	3.62
	1	HBLD1	ID_18326	0	0.36	1.02	1.29
	1	NTHL1	ID_18333	0	-0.14	0.64	1.19
	1	COL14A1	ID_18342	0	-0.02	0.88	2.91
	1	RGS5	ID_18347	0	0.18	0.94	2.35
	1	RGS9	ID_18352	0	0.33	1.64	2.5
	1	LRRC15	ID_18366	0	1.33	2.02	2.17
	1	AUH	ID_18368	0	0.61	1.03	1.24
	1	BRD7	ID_18369	0	0.34	0.94	1.04
	1	GKAP1	ID_18370	0	2.36	3.74	3.92
	1	LRRC20	ID_18377	0	0.14	1.84	1.97
	1	PIK3C2B	ID_18386	0	0.4	1.29	1.7
	1	LRRC28	ID_18388	0	0.25	1.16	1.86
	1	ALOX12	ID_18405	0	0.4	0.72	1.05
	1	LRRC44	ID_18439	0	-0.11	1.15	2.37
	1	LRRC49	ID_18455	0	-0.09	1.55	2.62
	1	FLJ21075	ID_18459	0	0.57	1.04	2.23
	1	GSK3B	ID_18463	0	0.14	0.44	1.04
	1	OTUB2	ID_18477	0	1.13	2.02	2.58
	1	LRRC50	ID_18490	0	0.15	1.11	1.49
	1	PBEF1 /// LOC646309	ID_18506	0	0.48	0.52	1.07
	1	OTUD3	ID_18507	0	0.43	0.58	1.2
	1	NFE2L3	ID_18516	0	1.8	3.17	3.65
	1	CSAD	ID_18523	0	-0.28	0.01	1.1
	1	FLJ12716	ID_18531	0	0.25	1.01	1.08
	1	IMPA2	ID_18534	0	1.33	2.38	2.5
	1	LRRC8B	ID_18537	0	1.03	2.38	2.5
	1	HLA-DMB	ID_18541	0	0.31	1.38	2.95
	1	HLA-DMA	ID_18542	0	-0.39	0.87	2.81
	1	UQCRQ	ID_18543	0	-0.22	0.09	0.82
	1	EFCAB4A	ID_18576	0	0.85	0.88	1.35
	1	BSCL2 /// HNRPUL2	ID_18602	0	-0.01	0.85	2.12
	1	TXNDC4	ID_18621	0	0.33	0.94	1.39
	1	CRIPT	ID_18635	0	0.44	1.83	2.27
	1	ADA	ID_18637	0	0.32	0.95	1.37
	1	FOXG1B	ID_18653	0	0.02	1.28	1.37
	1	PPP6C	ID_18685	0	0.28	0.98	1.24
	1	LOC497661	ID_18693	0	-0.24	0.35	1.27
	1	AGL	ID_18696	0	0.27	0.73	1.45
	1	MIR16	ID_18700	0	0.47	1.28	1.75
	1	BCKDHB	ID_18701	0	0.24	1.52	2.51
	1	GABRB3	ID_18709	0	0	0.53	1.58
	1	LOC90624	ID_18729	0	0.12	1.08	1.6
	1	TRIM37	ID_18746	0	0.25	1.08	1.36
	1	TRIM66	ID_18781	0	-0.06	1.19	2.32
	1	TRIM69	ID_18788	0	-0.32	0.19	1.63
	1	RFX3	ID_18831	0	0.64	1.63	2.46
	1	AREG /// LOC653193	ID_18850	0	3.42	6.53	6.62
	1	FLJ20489	ID_18851	0	0.13	1.09	1.8
	1	DGCR2	ID_18852	0	0.75	1.39	1.4
	1	PFKM	ID_18875	0	0.21	0.76	1.48
	1	TNFRSF9	ID_18881	0	-0.23	0.09	1.06
	1	LOC440928	ID_18882	0	-0.19	0.23	1.22
	1	MAP3K1	ID_18900	0	0.52	0.84	1.14
	1	CRIM2	ID_18911	0	-0.01	-0.1	0.9
	1	SLC9A3	ID_18935	0	-0.08	0.14	0.94
	1	LOC642775	ID_18944	0	0.28	0.16	1.03
	1	MAP2K6	ID_18949	0	1.42	4.14	4.13
	1	LOC148898	ID_18963	0	-0.07	0.22	1.39
	1	SNHG10	ID_18975	0	0.01	0.52	1.14
	1	ODC1	ID_18998	0	1.47	3.28	4.07
	1	C21ORF96	ID_19019	0	0.91	1.4	2.39
	1	DGCR11	ID_19040	0	0.28	1.03	0.87
	1	DGCR13	ID_19042	0	1.19	1.75	1.88
	1	XPR1	ID_19071	0	0.69	1.81	1.98
	1	C21ORF56	ID_19096	0	0.22	1.16	1.48
	1	TCEA2	ID_19107	0	-0.35	0.46	1.6
	1	LOC642716	ID_19108	0	-0.25	-0.12	1.4
	1	LOC440992	ID_19115	0	0.47	1.07	1.66
	1	SILV	ID_19117	0	0.83	3.81	5.48
	1	TCEB2	ID_19124	0	-0.26	-0.02	0.77
	1	HSPA4L	ID_19125	0	0.99	1.87	2.08
	1	UBLCP1	ID_19131	0	0.55	1.01	1.3
	1	EPAS1	ID_19194	0	0.09	0.42	1.08
	1	EPB41	ID_19195	0	0.49	0.99	1.04
	1	CRBN	ID_19207	0	0.13	0.43	1.36
	1	RHOU	ID_19227	0	0.79	1.14	1.8
	1	PEX1	ID_19229	0	0.97	2.17	2.24
	1	HIST3H2A	ID_19232	0	1.9	2.03	3.3
	1	POLG2	ID_19235	0	1.02	1.92	2.48
	1	RHOF	ID_19237	0	1.46	1.9	2.68
	1	LOC342979	ID_19240	0	0.4	1.54	1.7
	1	NCOA7	ID_19245	0	0.84	1.17	1.81
	1	PADI2	ID_19246	0	0.02	0.88	1.76
	1	CALCOCO1	ID_19267	0	0.79	1.88	2.51
	1	FUCA1	ID_19280	0	0.61	1.71	2.51
	1	HSDL2	ID_19287	0	0.2	1.06	1.59
	1	TWIST1	ID_19311	0	-0.17	0.28	1.37
	1	SIAE	ID_19327	0	0.3	0.92	1.52
	1	CSPP1	ID_19339	0	1.43	1.66	2.12
	1	CRYM	ID_19344	0	-0.02	2.09	3.42
	1	POLR2E	ID_19372	0	0.16	0.64	1.2
	1	POLR2J	ID_19375	0	0.16	0.32	1.03
	1	RB1CC1	ID_19386	0	0.68	1.55	1.99
	1	ETFDH	ID_19387	0	-0.06	1.02	1.66
	1	IPO13	ID_19400	0	0.33	1.36	1.14
	1	PRPF18	ID_19405	0	0.44	1.08	1.34
	1	TJP3	ID_19422	0	0.07	1.47	1.88
	1	CSPG5	ID_19432	0	0.2	1.87	2.41
	1	ODZ3	ID_19442	0	0.33	0.95	1.47
	1	RUNX3	ID_19471	0	0.61	1.01	1.53
	1	SAP18	ID_19481	0	0.28	1.18	1.11
	1	PEG3	ID_19508	0	-0.03	1.92	3.56
	1	RP11-151A6.2	ID_19539	0	-0.06	0.66	2.43
	1	HMCN1	ID_19549	0	-0.03	0.95	2.14
	1	SH3GL3	ID_19561	0	0.59	3.5	3.2
	1	SH3GL2	ID_19576	0	1.71	3.31	3.47
	1	NBEA	ID_19611	0	0.09	2.35	2.73
	1	MAP1LC3A	ID_19617	0	-0.22	0.17	0.81
	1	PDK3	ID_19658	0	-0.1	1.22	1.64
	1	PDK4	ID_19659	0	0.32	2.21	2.61
	1	BPHL	ID_19677	0	0.08	1.11	2.11
	1	ANKZF1	ID_19688	0	0.41	0.91	1.06
	1	ADHFE1	ID_19719	0	0.26	0.31	1.52
	1	PEG10	ID_19730	0	2.04	4.16	5
	1	LOC91893	ID_19741	0	-0.01	0.01	1.46
	1	BPGM	ID_19751	0	0.82	0.78	1.29
	1	CDC14B	ID_19768	0	1.13	1.3	1.65
	1	ACOT7	ID_19776	0	0.15	0.81	1.12
	1	ACOT8	ID_19777	0	-0.18	0.31	1.23
	1	VARSL	ID_19781	0	0.01	-0.14	0.87
	1	PCDH9	ID_19782	0	1.78	2.25	2.71
	1	HBA1 /// HBA2	ID_19787	0	0.19	1.58	3
	1	ETHE1	ID_19790	0	0.29	0.81	1.2
	1	LRCH2	ID_19839	0	0.79	1.94	1.95
	1	TRMT12	ID_19840	0	0.81	1.13	1.31
	1	FLJ20209	ID_19867	0	1.31	1.64	2.09
	1	PRKACA	ID_19908	0	0.39	1.1	1.48
	1	STK38L	ID_19932	0	1.61	1.79	2.17
	1	FANK1	ID_19935	0	0.62	1.58	2.06
	1	SALL2	ID_19937	0	0.93	1.77	1.89
	1	ULK1	ID_19939	0	0.65	0.62	1.12
	1	DGAT2	ID_19960	0	0.25	3.03	3.02
	1	PIK3R3	ID_19975	0	0.88	1.7	1.98
	1	PIK3R4	ID_19979	0	0.96	1.66	1.74
	1	MAGI3	ID_20005	0	0.58	0.98	1.02
	1	MAGI1	ID_20007	0	0.27	0.9	1.23
	1	PRO1853	ID_20012	0	0.77	1.29	1.52
	1	PCLO	ID_20014	0	0.04	2.33	4.46
	1	GRB14	ID_20020	0	2.29	3.63	4.04
	1	FLJ23556	ID_20044	0	0.17	1.16	1.73
	1	PBXIP1	ID_20064	0	0.36	1.06	2.22
	1	RUVBL2	ID_20074	0	0.35	1.44	1.73
	1	RUVBL1	ID_20075	0	0.31	1.09	1.13
	1	PDE2A	ID_20116	0	0.33	0.29	1.8
	1	MIPEP	ID_20129	0	0.82	1.9	1.93
	1	GCOM1	ID_20137	0	1.25	2.52	2.73
	1	PCMTD2	ID_20155	0	0.02	1.19	1.98
	1	TIMP4	ID_20160	0	0	0.26	2.4
	1	BIRC1 /// LOC648984	ID_20161	0	0.17	0.9	1.51
	1	PDE6D	ID_20168	0	0.75	1.97	1.91
	1	GPR137C	ID_20181	0	1.26	2.92	3.41
	1	CACNA1G	ID_20195	0	0.61	2.85	3.33
	1	MYH10	ID_20209	0	0.59	1.02	1.34
	1	NARS2	ID_20214	0	0.44	1.57	2.08
	1	CTBS	ID_20218	0	-0.18	0.52	1.3
	1	GDPD5	ID_20252	0	0.3	0.8	1.17
	1	GDPD1	ID_20262	0	0.61	2.74	3.03
	1	PLOD2	ID_20283	0	0.17	0.49	1.47
	1	C11ORF32	ID_20299	0	-0.04	2.95	4.24
	1	SLC2A12	ID_20318	0	1.24	3.67	3.93
	1	C11ORF65	ID_20322	0	0	0.02	2.1
	1	CTSL2	ID_20323	0	0.56	2.36	3.43
	1	LOC161527 /// LOC642	ID_20324	0	0.62	1.16	1.18
	1	GMCL1 /// GMCL1L	ID_20337	0	1.57	2.21	2.38
	1	LOC144363	ID_20348	0	-0.23	0.98	1.68
	1	C11ORF54	ID_20353	0	0.62	1.28	1.69
	1	NARF	ID_20385	0	0.26	1.04	0.96
	1	DNAJC12	ID_20387	0	0.19	3.48	4.57
	1	CHRDL1	ID_20399	0	0.7	1.76	2.55
	1	STAT4	ID_20410	0	0.73	3.78	4.1
	1	NAT1	ID_20421	0	0.07	1.28	1.62
	1	STAT1	ID_20428	0	0.55	1.22	1.14
	1	STAT3	ID_20435	0	0.55	1.09	1.53
	1	PBX1	ID_20442	0	0.31	0.4	1.08
	1	FRAS1	ID_20480	0	-0.01	0.14	1.28
	1	NAPA	ID_20487	0	0.24	0.89	1.01
	1	CPNE4	ID_20511	0	0.01	0.77	2.24
	1	CPNE3	ID_20529	0	0.55	1.27	1.29
	1	WIF1	ID_20530	0	0	0.82	2.96
	1	KCTD12	ID_20537	0	0.03	0.33	1.23
	1	FLJ23577	ID_20539	0	1.16	2.06	2.51
	1	C11ORF67	ID_20552	0	0.62	1.49	1.88
	1	NRXN3	ID_20554	0	0.44	3.87	4
	1	C11ORF71	ID_20569	0	-0.23	1.19	3.71
	1	C11ORF70	ID_20571	0	0.76	2.68	2.48
	1	CTSH	ID_20577	0	0.3	1.41	2.24
	1	FLJ20152	ID_20605	0	0.23	2.83	2.68
