# Supplementary material for: Systematic Analysis of Time-Series Gene Expression Data on Tumor Cell-Selective Apoptotic Responses to HDAC Inhibitors
Source: Comput Math Methods Med. 2014 Oct 13;2014:867289. doi: 10.1155/2014/867289 (PMC4211306; doi:10.1155/2014/867289)
Supplement: Supplementary file 1 — Table S1. H-score of all pathways for tumor and normal samples: This table lists the name, category, website and H-score values for all 1307 pathway. Table S2. Illustrative pathways belonging to term "No responding": This table lists the name, category, website and TVPC patterns for "No responding" pathways. Table S3. Illustrative pathways belonging to term "Consistent responding": This table lists the name, category, website and TVPC patterns for "Consistent responding" pathways. Table S4. Illustrative pathways belonging to term "Tumor specific responding": This table lists the name, category, website and TVPC patterns for "Tumor specific responding" pathways. Table S5. Illustrative pathways belonging to term "Normal specific responding": This table lists the name, category, web site and TVPC patterns for "Normal specific responding" pathways. Table S6. Illustrative pathways belonging to term "Divergent responding": This table lists the name, category, website and TVPC patterns for "Divergent responding" pathways. Table S7. Genes within profile #0 for normal samples: This table contains all genes within profile #0 for normal samples, and lists the normalized expression data to the right of gene symbol. Table S8. Genes within profile #2 for normal samples: This table contains all genes within profile #2 for normal samples, and lists the normalized expression data to the right of gene symbol. Table S9. Genes within profile #9 for normal samples: This table contains all genes within profile #9 for normal samples, and lists the normalized expression data to the right of gene symbol. Table S10. Genes within profile #12 for normal samples: This table contains all genes within profile # 12 for normal samples, and lists the normalized expression data to the right of gene symbol. Table S11. Genes within profile #14 for normal samples: This table contains all genes within profile #14 for normal samples, and lists the normalized expression data to the right of gene symbol. Ta [file 867289.f1.zip › 867289.f1/Table S11.xls]

## Sheet: Sheet1
Gene Table for Profile 14 (0.0,2.0,3.0,2.0) Normal
Num. Genes Expected	Num. Genes Assigned	P-Value	Significant
587	279.2	4.6e-62	(significant)
-------
Selected	Weight	Gene Symbol	SPOT	0h	4h	12h	24h
	1	UGCG	ID_25	0	0.94	0.92	1.03
	1	ACAA1	ID_42	0	1.01	1.7	1.66
	1	SCML1	ID_126	0	1.09	0.96	0.83
	1	ATRN	ID_141	0	0.76	1.15	1.14
	1	C20ORF6	ID_143	0	1.04	1.09	1.1
	1	NEU1	ID_185	0	0.88	2.04	1.6
	1	LOC283849 /// LOC653	ID_258	0	1.05	0.99	1
	1	ACAD8	ID_260	0	1.03	1.06	0.71
	1	GCK	ID_302	0	0.2	1.26	0.86
	1	TM2D2	ID_371	0	0.94	1.54	1.28
	1	PRIM2A	ID_414	0	0.98	1.44	0.93
	1	TEX2	ID_432	0	1.08	1.76	1.18
	1	FYN	ID_435	0	0.99	1.76	1.65
	1	DKFZP434N062	ID_499	0	0.88	1.55	1.2
	1	CBFA2T2	ID_517	0	1.63	1.71	1.45
	1	FOS	ID_519	0	1.46	1.28	1.18
	1	MDM1	ID_537	0	1.91	2.45	2.02
	1	CAMK2G	ID_542	0	1.43	1.29	1.22
	1	RP5-875H10.1	ID_544	0	0.64	1.47	1.24
	1	HSPA12A	ID_638	0	1.48	2.3	1.7
	1	RANBP10	ID_648	0	1.16	1.55	1.65
	1	ARHGEF3	ID_670	0	2.31	2.52	2.32
	1	HN1	ID_678	0	0.59	1.78	1.37
	1	RGC32	ID_707	0	3.42	2.95	2.22
	1	LYSMD4	ID_757	0	2.31	1.77	1.32
	1	BTAF1	ID_800	0	0.87	1.1	0.97
	1	LOC115648	ID_852	0	1.04	1.32	1.45
	1	DEPDC7	ID_864	0	2.14	1.77	1.45
	1	C14ORF78	ID_890	0	1.25	2.15	1.89
	1	KLHL7	ID_986	0	1.33	2	1.59
	1	IQCK	ID_1002	0	0.53	1.17	0.62
	1	ARNTL	ID_1004	0	1.93	3.23	2.68
	1	PARD6A	ID_1041	0	0.68	1.83	1.4
	1	PARD6B	ID_1044	0	2.46	2.66	2.25
	1	GLS	ID_1053	0	0.68	1.13	0.86
	1	PARD6G	ID_1054	0	0.69	1.39	1.22
	1	AGTR1	ID_1148	0	1.44	2.5	2.42
	1	KIAA1919	ID_1189	0	2.55	2.27	1.81
	1	IL17D	ID_1195	0	1.67	2.64	1.33
	1	LOC401577	ID_1229	0	1.03	1.03	0.54
	1	ARL5B	ID_1234	0	0.71	1.04	0.66
	1	ARL4D	ID_1258	0	1.9	1.67	1.05
	1	ARL4C	ID_1259	0	2.35	2.01	1.75
	1	ARL4A	ID_1260	0	1.2	1.15	1.19
	1	KIAA1958	ID_1266	0	1.86	2.31	2.02
	1	EXOC8	ID_1267	0	0.65	0.99	1.01
	1	LOC652968	ID_1311	0	1.78	1.98	2.01
	1	FDFT1	ID_1324	0	0.79	1.34	1.1
	1	LOC285147	ID_1344	0	1.66	2.39	1.79
	1	JRKL	ID_1381	0	0.71	1.06	1.07
	1	HIC2	ID_1438	0	0.94	1.13	0.77
	1	CATSPER2	ID_1481	0	0.76	1.34	1.14
	1	EPHB3	ID_1490	0	2.12	2.1	1.56
	1	RAB40B	ID_1494	0	1.12	1.19	1.07
	1	SLC31A2	ID_1505	0	0.7	1.19	0.92
	1	CELSR2	ID_1515	0	1.47	2.74	2.58
	1	EPHA4	ID_1528	0	1.42	1.78	1.82
	1	MAGEE1	ID_1827	0	0.79	1.02	0.64
	1	DAAM1	ID_1845	0	2.64	2.99	3.3
	1	LOC57146	ID_1886	0	1.22	1.57	1.57
	1	ST3GAL5	ID_1955	0	1.75	1.75	1.4
	1	ADRB2	ID_2040	0	4.54	4.98	4.5
	1	OSBPL6	ID_2135	0	0.77	1.03	0.83
	1	GALK2	ID_2214	0	1.35	1.95	1.7
	1	ABCD3	ID_2220	0	1.12	1.95	1.69
	1	C20ORF74	ID_2301	0	3.27	3.35	3.46
	1	PSMB9	ID_2345	0	0.35	1.05	0.66
	1	LACTB	ID_2446	0	1.17	1.22	1.16
	1	LOC647135	ID_2479	0	1.33	1.45	1.05
	1	MARK4	ID_2514	0	1.36	1.71	1.62
	1	FLJ13305	ID_2558	0	0.88	1.47	1
	1	USP20	ID_2597	0	1.43	1.83	1.36
	1	FLJ90757	ID_2637	0	2.76	3.46	2.31
	1	MICB	ID_2653	0	1.44	2.43	1.95
	1	GPR89A	ID_2664	0	1.14	1.37	1.36
	1	CNNM4	ID_2788	0	1.05	1.99	1.54
	1	FBXO3	ID_2894	0	1.03	1.8	1.57
	1	CHST12	ID_2943	0	0.89	1.48	1.31
	1	CHST11	ID_2946	0	1.11	1.17	1.1
	1	TOR1AIP2	ID_3048	0	0.76	1.56	0.95
	1	UBN1	ID_3115	0	0.7	1.16	0.75
	1	MGC42105	ID_3212	0	1.88	1.63	1.5
	1	TGFBR3	ID_3225	0	1.71	1.9	1.74
	1	TAF3	ID_3351	0	0.91	1.08	0.99
	1	FRMD5	ID_3384	0	2.71	3.68	3.87
	1	HEY1	ID_3387	0	2.79	2.45	2.24
	1	PCYT2	ID_3390	0	0.89	1.09	0.78
	1	NUP98	ID_3418	0	0.89	1.02	0.9
	1	HEYL	ID_3457	0	2.4	3.32	2.48
	1	CLEC4A	ID_3486	0	0.58	1.3	1.08
	1	CGN	ID_3502	0	0.39	1.67	0.85
	1	AKAP13	ID_3519	0	1.19	1.39	1.48
	1	TMOD2	ID_3556	0	0.44	1.3	0.96
	1	ATP6V1B2	ID_3695	0	0.86	1.06	0.75
	1	HOXA1	ID_3698	0	2.52	3.64	3.42
	1	HABP4	ID_3746	0	1.56	1.59	1.12
	1	KIAA0513	ID_3806	0	1.67	2.01	1.7
	1	FLJ40432	ID_3896	0	0.99	2.31	1.83
	1	NOLC1	ID_3910	0	0.95	1.18	0.82
	1	KIAA0895	ID_3927	0	2.84	3.35	3.45
	1	CARD10	ID_3932	0	2.76	3.05	2.23
	1	TESK2	ID_3991	0	1.54	2.38	1.97
	1	CLDN1	ID_4066	0	2.14	2.91	2.52
	1	FKBP5	ID_4080	0	1.25	2.08	1.18
	1	GTF3C1	ID_4100	0	0.65	1.11	0.9
	1	DMD	ID_4169	0	0.7	1.38	0.67
	1	DMN	ID_4182	0	1.74	3.36	2.51
	1	ARSK	ID_4211	0	0.98	1.77	1.35
	1	DACT3	ID_4230	0	2.18	1.9	1.71
	1	PPFIA1	ID_4238	0	0.34	1.3	0.93
	1	CORO1A	ID_4332	0	1.75	3.41	1.63
	1	MSH5 /// C6ORF26	ID_4334	0	2.22	3.26	2.88
	1	ADIPOR2	ID_4359	0	0.8	1.26	1.14
	1	CHST2	ID_4360	0	0.93	1.25	1.03
	1	MFN1	ID_4370	0	0.59	1.23	1.08
	1	GEMIN5	ID_4389	0	0.96	1.55	1.46
	1	WDR67	ID_4487	0	0.49	1.16	0.58
	1	WDR47	ID_4536	0	1.03	1.2	0.83
	1	WDR19	ID_4557	0	1.6	2.18	2.31
	1	PTK2B	ID_4562	0	0.74	1.75	0.84
	1	MNAT1	ID_4578	0	0.7	1.08	0.71
	1	DDX48	ID_4659	0	1.06	1.36	0.95
	1	DDX55	ID_4682	0	0.74	1.08	0.7
	1	SAT1	ID_4703	0	1.23	1.66	1.38
	1	SAV1	ID_4749	0	0.8	0.99	1.06
	1	POLB	ID_4810	0	1.14	2.29	2.12
	1	GCC1	ID_4812	0	0.82	1.02	0.8
	1	RPS27 /// LOC646233	ID_4837	0	0.75	1.25	1
	1	GCDH	ID_4838	0	1.62	2.84	2.69
	1	GCH1	ID_4882	0	4.21	4.74	4.04
	1	SPATA5	ID_4897	0	1.38	1.88	1.97
	1	SPATA7	ID_4900	0	0.87	1.48	1.33
	1	LYST	ID_4937	0	1.4	1.54	1.55
	1	ZNF782	ID_5056	0	1.84	2.42	2.26
	1	MEGF9	ID_5150	0	2.23	2.57	2.29
	1	LOC653464	ID_5195	0	0.69	1.22	0.83
	1	CDKN2B	ID_5201	0	3.16	3.5	3.85
	1	EDG7	ID_5222	0	2.17	3.58	3.34
	1	LOC285812	ID_5273	0	2.78	2.75	2.81
	1	PDZD8	ID_5293	0	0.97	1.01	0.74
	1	STXBP1	ID_5339	0	0.45	1.01	0.55
	1	STXBP6	ID_5348	0	0.98	1.31	1.11
	1	FAM69A	ID_5541	0	0.38	1.03	0.47
	1	C8ORF41	ID_5595	0	0.48	1.16	0.93
	1	UBE2D1	ID_5653	0	0.71	1.17	0.95
	1	ARHGAP12	ID_5706	0	1.06	0.96	0.75
	1	ARHGAP20	ID_5710	0	2.68	3.54	2.86
	1	SERAC1	ID_5711	0	1.82	2.71	1.65
	1	FAM62C	ID_5724	0	0.47	1.18	0.92
	1	ARHGAP26	ID_5731	0	2.37	3.23	2.96
	1	CEP68	ID_5770	0	1.65	1.72	1.14
	1	PGD	ID_5789	0	0.55	1.07	0.69
	1	MTERFD3	ID_5805	0	1.17	1.54	1.55
	1	RHPN2	ID_5832	0	2.33	1.99	1.37
	1	C3ORF25	ID_5857	0	0.51	1.56	0.8
	1	HSF2	ID_5892	0	1.05	1.14	0.88
	1	CAPN5	ID_5957	0	0.59	1.36	0.95
	1	LOC653352	ID_6009	0	1.01	1.28	0.92
	1	ANKDD1A	ID_6062	0	1.38	2.03	1.99
	1	GPR37	ID_6084	0	0.94	1.17	0.69
	1	KIDINS220	ID_6119	0	0.86	1.78	1.45
	1	ULBP2	ID_6136	0	0.58	1.49	0.99
	1	FLJ31818	ID_6167	0	1.57	1.53	1.48
	1	C6ORF152	ID_6217	0	1.28	1.69	1.46
	1	SRP54	ID_6265	0	0.52	1.07	0.98
	1	SLC27A1	ID_6291	0	1.62	2.61	2.39
	1	PREPL	ID_6351	0	0.86	1.54	1.41
	1	PSCD1	ID_6357	0	1.07	1.23	0.85
	1	PSCD3	ID_6362	0	0.75	0.96	1.05
	1	POR	ID_6416	0	0.75	1.64	1.4
	1	SLC38A4	ID_6428	0	2.33	3.89	3.33
	1	C3ORF40	ID_6458	0	1.14	1.29	1.29
	1	C3ORF34	ID_6503	0	1.39	2.49	2.34
	1	C6ORF157	ID_6523	0	1.45	1.78	2
	1	KIAA0103	ID_6529	0	0.67	1.21	0.75
	1	ZNF509	ID_6619	0	1.25	1.11	1.09
	1	ZNF510	ID_6667	0	1.19	1.38	1.33
	1	ACSBG1	ID_6674	0	0.84	1.61	1.4
	1	C19ORF28	ID_6683	0	0.84	1.35	0.86
	1	HRBL	ID_6705	0	0.81	1.78	1.41
	1	PLCXD2	ID_6717	0	3.24	3.6	3.77
	1	ZNF540	ID_6744	0	0.79	1.48	0.76
	1	SNF1LK2	ID_6776	0	1.32	1.47	1.44
	1	FGD6	ID_6897	0	1.6	1.72	1.94
	1	C17ORF65	ID_6951	0	0.84	1.23	1.16
	1	C17ORF80	ID_7012	0	1.08	1.64	1.35
	1	LOC92017	ID_7030	0	0.74	1.03	0.6
	1	C1ORF102	ID_7072	0	0.71	1.34	0.97
	1	C1ORF124	ID_7115	0	1.1	1.04	0.67
	1	RBBP5	ID_7171	0	1.53	1.66	1.49
	1	SLC24A6	ID_7178	0	0.9	1.41	1.22
	1	RAB11FIP1	ID_7193	0	1.64	2.39	1.86
	1	KIAA0485	ID_7260	0	1.17	1.16	1.07
	1	KIAA0423	ID_7324	0	1.31	1.37	1.02
	1	NBPF1 /// NBPF3 ///	ID_7333	0	1.17	1.37	1.24
	1	PALLD	ID_7334	0	1.68	2.71	2.57
	1	RTTN	ID_7335	0	0.51	1.11	0.67
	1	GPRC5B	ID_7352	0	2.35	3.51	2.76
	1	GPR4	ID_7355	0	1.1	2.1	1.73
	1	KIAA0404	ID_7375	0	1.05	2.23	1.64
	1	PHF20L1	ID_7377	0	0.82	1.03	0.78
	1	ZNF57	ID_7405	0	2.1	1.84	1.42
	1	ZNF650	ID_7458	0	0.52	1.21	0.82
	1	ZNF610	ID_7467	0	1.02	1.09	1.02
	1	ZNF77	ID_7468	0	1.64	1.89	2.1
	1	KIAA1009	ID_7480	0	1.98	2.6	1.55
	1	ZNF10	ID_7535	0	1.46	1.87	1.36
	1	MICAL3	ID_7565	0	1.58	2.21	2.04
	1	LOC23117	ID_7660	0	1.31	1.26	1.03
	1	RTF1	ID_7737	0	0.72	1.28	1.11
	1	SLC9A3R1	ID_7748	0	2.24	2.96	2.43
	1	HSPA2	ID_7774	0	2.69	3.34	3.66
	1	GOT1	ID_7821	0	0.69	1.42	0.95
	1	LPPR4	ID_7853	0	0.97	1.81	1.67
	1	HERC1	ID_7939	0	0.81	1.56	1.47
	1	FAM79A	ID_7960	0	0.47	1.13	0.72
	1	CLDN23	ID_7974	0	0.93	1.86	1.69
	1	PAG1 /// LOC653745	ID_7982	0	3.23	3.1	2.54
	1	CDKL3	ID_8009	0	1.52	1.56	1.77
	1	CDKL5	ID_8011	0	2.18	2.39	1.88
	1	KIAA0350	ID_8018	0	1.49	2.02	1.94
	1	ARL13B	ID_8040	0	1.15	1.23	0.71
	1	HPS3	ID_8052	0	0.83	1.82	1.46
	1	UNC84A	ID_8160	0	1.34	1.99	1.68
	1	DHX57	ID_8185	0	0.54	1.17	0.99
	1	LOC284371	ID_8196	0	1.31	1.76	1.26
	1	ATP10D	ID_8223	0	0.57	1.05	0.95
	1	C10ORF137	ID_8235	0	1.39	1.37	1.41
	1	DHX16	ID_8325	0	1.01	1.25	1.34
	1	ZNF304	ID_8391	0	1.24	1.34	1.36
	1	BAIAP2	ID_8411	0	3.15	2.8	1.77
	1	ZNF324	ID_8456	0	1.32	1.38	1.38
	1	ZNF313	ID_8477	0	0.91	1.09	0.73
	1	RNF150	ID_8482	0	1.47	1.68	1.72
	1	SLC45A4	ID_8502	0	1.43	1.68	1.19
	1	DKFZP434B0335	ID_8577	0	0.83	1.42	1.29
	1	CCRK	ID_8605	0	0.63	1.03	0.69
	1	LOC285346	ID_8607	0	1.1	1.53	1.57
	1	CLTCL1	ID_8685	0	1.42	2.44	2.29
	1	TSNAX	ID_8695	0	0.58	1.22	0.99
	1	KIN	ID_8748	0	1.26	1.28	1.25
	1	GJC1	ID_8749	0	0.7	1.13	0.32
	1	TYW1	ID_8753	0	0.96	1.15	0.94
	1	KHK	ID_8784	0	0.57	1.78	1.4
	1	PTCH1	ID_8787	0	2.33	2.4	2.6
	1	KIAA1727	ID_8798	0	1.5	1.82	1.78
	1	FGFR2	ID_8816	0	0.73	1.33	0.68
	1	KIAA1706	ID_8831	0	2.57	2.47	2.02
	1	CXCR4	ID_8862	0	1.43	1.78	1.71
	1	CXCR7	ID_8863	0	1.41	1.86	1.54
	1	OSAP	ID_8867	0	0.86	1.83	1.65
	1	NRIP3	ID_8868	0	1.75	2.82	2.32
	1	LMBRD2	ID_8875	0	0.97	2.23	1.97
	1	KUA	ID_8934	0	1.17	1.02	0.72
	1	NPHP4	ID_8980	0	0.48	1.09	0.55
	1	SLC23A2	ID_9028	0	1.3	1.68	1.83
	1	FBXL14	ID_9036	0	1.01	1.49	1.5
	1	FBXL16	ID_9038	0	0.77	2.87	2.21
	1	FLNB	ID_9072	0	1.63	2.09	1.73
	1	ZNF483	ID_9085	0	2.96	2.92	3.04
	1	CRISPLD2	ID_9097	0	2.02	2.26	1.7
	1	GLIPR1	ID_9099	0	0.59	1.17	0.75
	1	ZNF445	ID_9146	0	0.7	1.07	0.62
	1	CDO1	ID_9162	0	1.96	3.81	2.9
	1	ZNF439	ID_9165	0	1.2	1.3	0.99
	1	ZNF434	ID_9167	0	0.64	1.02	0.9
	1	AZI1	ID_9189	0	1.08	1.67	1
	1	ZNF420	ID_9197	0	1.49	1.68	1.78
	1	LMCD1	ID_9205	0	2.79	2.51	2.46
	1	LSG1	ID_9293	0	1.15	1.26	1.34
	1	RDH13	ID_9317	0	1.92	2.09	1.37
	1	ASPHD2	ID_9357	0	2.51	3.32	3.49
	1	FAM91A1	ID_9404	0	0.86	1.56	1.5
	1	NOC2L	ID_9432	0	0.4	1.09	0.73
	1	P15RS	ID_9447	0	0.22	1.05	0.72
	1	TIAM2	ID_9486	0	0.92	1.21	0.92
	1	RAP2A /// RAP2B	ID_9597	0	1.23	1.17	1.15
	1	KIAA1522	ID_9645	0	1.47	1.85	1.64
	1	TMEM104	ID_9751	0	0.95	1.51	1.21
	1	PAPD5	ID_9762	0	2.13	1.77	1.34
	1	FABP3	ID_9873	0	0.71	1.25	0.35
	1	MAX	ID_9889	0	1	1.08	1.02
	1	PTGER2	ID_9913	0	1.72	2.43	2.53
	1	PTGER3	ID_9914	0	0.25	1.47	0.9
	1	PTGER4	ID_9915	0	5.42	5.14	4.53
	1	MAK	ID_9948	0	2.39	2.42	2.47
	1	C7ORF46	ID_9995	0	0.76	2.16	1.41
	1	RAB20	ID_9996	0	1.34	1.42	1.02
	1	TMEM24	ID_10012	0	1.2	1.02	0.78
	1	RYBP	ID_10063	0	0.96	1.29	1.21
	1	ZDHHC11	ID_10123	0	1.88	2.76	2.76
	1	HSPA1A /// HSPA1B	ID_10140	0	2.77	2.64	2.43
	1	ZDHHC23	ID_10153	0	1.81	1.76	0.95
	1	CRYGS	ID_10197	0	1.52	1.48	1.43
	1	FNBP1L	ID_10244	0	1.92	1.82	1.64
	1	TMEM34	ID_10386	0	0.99	1.67	1.47
	1	TMEM35	ID_10387	0	2.45	3.51	2.02
	1	ZNF230	ID_10497	0	0.68	1.14	0.45
	1	ZNF294	ID_10537	0	0.76	1.04	1.01
	1	KIAA1411	ID_10556	0	0.82	1.24	0.99
	1	ATP7A /// LOC644732	ID_10564	0	0.85	1.15	1.07
	1	CMTM8	ID_10660	0	0.99	0.98	1.08
	1	TSPAN2	ID_10676	0	2.24	4.29	3.7
	1	EID3	ID_10718	0	1.65	2.5	2.51
	1	C18ORF8	ID_10742	0	1.43	2.08	1.73
	1	CXADR	ID_10762	0	5.27	6.48	6.6
	1	TRIM2	ID_10769	0	0.61	1.01	0.57
	1	EIF2B3	ID_10862	0	0.18	1.11	0.77
	1	SUFU	ID_10982	0	1.06	1.36	1.17
	1	C14ORF129	ID_11006	0	1.2	1.45	0.94
	1	CBX4	ID_11014	0	1.12	0.88	0.61
	1	PAQR3	ID_11057	0	0.78	1.34	0.76
	1	CHMP2B	ID_11063	0	0.88	1.21	1.08
	1	ATF7IP2	ID_11089	0	0.85	1.02	0.86
	1	SV2A	ID_11102	0	1.6	2.05	1.09
	1	MPP1	ID_11110	0	1.19	2.29	2.1
	1	ING1	ID_11156	0	0.98	0.96	1.07
	1	KISS1R	ID_11236	0	2.6	3.18	2.53
	1	ADARB1	ID_11397	0	1.35	2.18	2.12
	1	AVPI1	ID_11400	0	1.89	2.44	2.5
	1	LOC115648 /// LOC148	ID_11494	0	0.87	1.12	0.91
	1	PDPK1	ID_11505	0	1.28	1.42	1.11
	1	C10ORF56	ID_11518	0	1.18	1.09	0.71
	1	FAM117A	ID_11545	0	2.34	2.79	2.63
	1	LOC441242 /// C11ORF	ID_11558	0	1.29	1.21	1.14
	1	JARID2	ID_11561	0	1.11	1.12	1.25
	1	GFPT2	ID_11585	0	1.67	2.26	1.61
	1	LYPLA3	ID_11622	0	1.25	1.83	1.28
	1	FAM118A	ID_11623	0	1.34	1.64	1.13
	1	FAM118B	ID_11629	0	1.08	1.82	1.11
	1	SLC25A30	ID_11631	0	0.81	1.05	0.98
	1	SLU7	ID_11642	0	0.85	0.96	1.07
	1	LOC221955	ID_11721	0	0.88	1.14	0.94
	1	EML4	ID_11728	0	1.49	1.14	0.82
	1	HS6ST1	ID_11760	0	2.02	2.42	1.85
	1	SLC25A44	ID_11761	0	1.39	1.74	1.68
	1	GRAMD1C	ID_11869	0	0.75	1.9	1.5
	1	SMG1	ID_11957	0	0.78	1.13	0.92
	1	PPM1B	ID_12011	0	1.01	1.31	1.21
	1	ADD3	ID_12093	0	0.81	1.43	0.82
	1	MRE11A	ID_12099	0	0.62	1.39	0.91
	1	FAM122B	ID_12100	0	0.95	2	1.55
	1	NFKB2	ID_12143	0	0.97	0.98	1.1
	1	FAM46C	ID_12175	0	3.13	3.03	1.83
	1	FAM46B	ID_12177	0	3.26	3.49	3.09
	1	FAM126A	ID_12218	0	1.09	1.52	1.23
	1	PAG1	ID_12237	0	2.91	3.13	2.77
	1	ENO2	ID_12343	0	0.7	1.02	0.83
	1	MYLIP	ID_12362	0	2.8	2.93	2.96
	1	LZTS1	ID_12415	0	1.7	1.56	0.94
	1	ST6GALNAC5	ID_12427	0	0.96	1.13	0.66
	1	GFOD1	ID_12438	0	2.15	2.1	2.29
	1	SH3PXD2B	ID_12441	0	1.26	1.02	0.79
	1	ACSL1	ID_12478	0	0.56	1.09	0.7
	1	XRRA1	ID_12541	0	1.18	2.39	2.12
	1	VAMP1	ID_12555	0	3.17	2.65	2.5
	1	LOC93622	ID_12570	0	1.02	1.13	0.63
	1	MTF1	ID_12664	0	0.65	1.26	1.16
	1	CHKA	ID_12670	0	2.74	2.57	1.9
	1	KLF2	ID_12693	0	1.32	1.57	1.1
	1	AGPAT4	ID_12708	0	0.81	1.2	0.82
	1	FKBP14	ID_12722	0	0.72	1.05	0.99
	1	KLC3	ID_12746	0	0.43	1.34	0.93
	1	PGBD5	ID_12750	0	0.92	2.46	1.66
	1	MLLT4	ID_12768	0	1.17	1.5	1.32
	1	TOM1L2	ID_12778	0	0.93	1.1	1.01
	1	ACSS2	ID_12785	0	0.68	1.14	1.06
	1	SNX2	ID_12813	0	0.65	1.42	1.24
	1	KLHL26	ID_12855	0	1.83	1.77	1.05
	1	PRKD2	ID_12888	0	1.07	1.36	1.43
	1	MTM1	ID_12919	0	1.16	1.96	1.91
	1	FLJ46419 /// LOC6420	ID_13031	0	0.71	1.43	1.3
	1	JAG2	ID_13144	0	0.62	1.11	0.31
	1	ELOVL4	ID_13155	0	2.19	2.26	2.2
	1	ELOVL3	ID_13156	0	2.55	4.7	3.57
	1	PQLC1	ID_13165	0	0.73	1.23	0.61
	1	HDAC11	ID_13182	0	0.59	1.06	0.83
	1	LOC389072	ID_13184	0	0.35	1.29	1.01
	1	NFIL3	ID_13240	0	0.99	1.34	1.22
	1	ORC3L	ID_13304	0	0.44	1.15	0.49
	1	ELOF1	ID_13373	0	0.58	1.12	0.92
	1	ZCCHC17	ID_13388	0	1.02	1.76	1.38
	1	ZCCHC14	ID_13389	0	2.47	2.36	2.29
	1	PPP1R2	ID_13424	0	0.45	1.13	0.85
	1	THAP10	ID_13487	0	1.54	1.7	1.67
	1	WDR8	ID_13496	0	0.29	1.39	0.86
	1	WDR3	ID_13508	0	1.21	1.28	0.98
	1	SETD3	ID_13584	0	0.61	1.11	0.79
	1	RORA	ID_13596	0	1.08	1.32	0.7
	1	SIPA1L2	ID_13607	0	2.38	3.55	3.45
	1	KBTBD9	ID_13636	0	0.98	1.43	1.41
	1	TMEM57 /// RP11-308B	ID_13638	0	0.97	2.05	1.62
	1	MKNK2	ID_13704	0	1.31	1.03	0.87
	1	ANKS6	ID_13716	0	1.78	1.79	1.81
	1	DCUN1D2	ID_13774	0	1.43	1.47	1.45
	1	TRFP	ID_13856	0	0.39	1.37	0.66
	1	SAP130	ID_13915	0	1.06	1.33	1.33
	1	FLJ21908	ID_14053	0	0.87	1.24	0.51
	1	OXNAD1	ID_14075	0	1.3	1.97	1.61
	1	TUBB2B	ID_14125	0	5.53	7.75	7.71
	1	ACTG2	ID_14136	0	1.83	3.3	2.56
	1	FLJ21963	ID_14151	0	0.98	1.66	1.33
	1	BCL2L11	ID_14160	0	2.94	2.74	2.27
	1	SYTL3	ID_14224	0	1.03	1.12	1.07
	1	SRGAP2	ID_14251	0	0.72	1.29	0.79
	1	FGFR1OP2	ID_14291	0	1.3	1.34	1.47
	1	GRHL1	ID_14305	0	5.17	5.29	4.28
	1	TOR1B	ID_14398	0	0.62	1.09	0.33
	1	RAPGEF6	ID_14437	0	1.08	1.52	1.44
	1	USP2	ID_14539	0	1.5	1.86	1.25
	1	C22ORF9	ID_14598	0	0.43	1.16	0.7
	1	C9ORF75	ID_14665	0	0.93	1.11	0.58
	1	C9ORF77	ID_14667	0	1.62	1.62	1.58
	1	C9ORF126	ID_14707	0	1.69	2.09	1.35
	1	C9ORF80	ID_14716	0	0.78	1.22	0.86
	1	TNFRSF21	ID_14724	0	0.85	1.7	1.53
	1	GLRX5	ID_14726	0	1.16	1.5	1.53
	1	C9ORF65	ID_14764	0	1	1.34	0.84
	1	CRSP7	ID_14767	0	1.81	1.53	1.37
	1	LIPG	ID_14790	0	1.88	2.52	2.38
	1	LIFR	ID_14818	0	2.62	2.57	2.12
	1	ATPBD1C	ID_15005	0	0.83	1.77	1.41
	1	BCR /// LOC644165 //	ID_15045	0	0.61	1.4	0.79
	1	C4ORF15	ID_15063	0	0.31	1.08	0.49
	1	ZBTB48	ID_15069	0	1.86	2.25	1.88
	1	GOLGA1	ID_15114	0	0.92	1.12	0.95
	1	TUFT1	ID_15195	0	3.48	3.64	3.69
	1	TNFAIP8L1	ID_15259	0	2.13	2.46	1.99
	1	GRB2	ID_15264	0	0.66	1.05	0.99
	1	CCDC41	ID_15344	0	0.42	1.01	0.64
	1	LOC221362	ID_15345	0	2.36	2.09	1.48
	1	CCDC45	ID_15356	0	1.78	2.34	2.17
	1	C6ORF85	ID_15364	0	0.42	1.49	1.09
	1	UTP6	ID_15377	0	0.58	1.04	0.81
	1	CCDC75	ID_15410	0	1.08	1.04	0.87
	1	LOC284926	ID_15425	0	0.84	1.49	1.16
	1	CGRRF1	ID_15436	0	1.01	1.15	1.24
	1	CCDC82	ID_15486	0	0.88	1.04	0.65
	1	MXD1	ID_15517	0	1.84	1.43	1.09
	1	OTUD6B	ID_15606	0	0.98	1.18	1.11
	1	DOPEY2	ID_15620	0	0.88	1.58	1.35
	1	DOPEY1	ID_15621	0	1.24	1.41	1.24
	1	DPF3	ID_15683	0	2.65	2.41	1.88
	1	TSPYL1	ID_15694	0	0.65	1.03	0.98
	1	CCDC112	ID_15722	0	1.66	2.41	2.41
	1	THSD1 /// THSD1P	ID_15753	0	1.94	1.66	1.33
	1	STC1	ID_15778	0	1.93	1.68	1.11
	1	DENND2C	ID_15789	0	1.04	0.94	0.94
	1	DENND3	ID_15840	0	1.52	1.53	1.23
	1	STARD5	ID_15889	0	2.75	2.65	2.43
	1	STK3	ID_15908	0	0.32	1.27	0.9
	1	B3GNT2	ID_15944	0	1.49	1.27	0.88
	1	LGR4	ID_15967	0	1.33	1.45	1.26
	1	NCKIPSD	ID_15972	0	0.4	1.02	0.66
	1	PPP1R14C	ID_15973	0	0.66	1.88	0.94
	1	TPMT	ID_16021	0	1.51	2.3	2.03
	1	TRAFD1	ID_16098	0	1.73	1.88	1.89
	1	EVI5	ID_16104	0	0.6	1.42	1.24
	1	ABHD6	ID_16122	0	1.13	1.34	0.81
	1	ABHD2	ID_16129	0	1.56	1.48	1.39
	1	MGC39606 /// LOC6445	ID_16184	0	5.03	6.09	6.24
	1	GPR135	ID_16304	0	2.96	3.21	3.57
	1	PELI1	ID_16354	0	1.71	1.52	1.16
	1	VIL2	ID_16392	0	1.16	1.84	1.84
	1	MCOLN2	ID_16452	0	0.77	2	1.15
	1	PPTC7	ID_16480	0	1.66	1.94	1.85
	1	SLC4A11	ID_16487	0	0.92	1.21	0.59
	1	C2ORF44	ID_16489	0	1.41	1.47	1.44
	1	C2ORF34	ID_16513	0	1.43	1.87	2.02
	1	C2ORF31	ID_16519	0	3.47	3.81	3.28
	1	C16ORF45	ID_16523	0	0.98	1.15	1.13
	1	ALS2	ID_16610	0	1.54	1.8	1.68
	1	LOC643837	ID_16622	0	0.78	1.47	0.34
	1	RPS6KA5	ID_16772	0	1.14	2.63	2.32
	1	RPS6KA1	ID_16780	0	0.68	1.74	0.65
	1	DOCK9	ID_16843	0	0.61	1.69	1.25
	1	DDEFL1	ID_16893	0	0.79	1.5	1
	1	ALAD	ID_16906	0	0.75	1.73	1.49
	1	EFNB2	ID_16923	0	1.73	1.76	1.92
	1	RSHL2	ID_16935	0	0.83	1.01	0.75
	1	EFNA4	ID_16943	0	2.5	2.59	2.09
	1	BMP6	ID_16981	0	1.43	2.73	2.23
	1	DHCR24	ID_16991	0	0.46	1.31	1.07
	1	LOC51057	ID_17044	0	0.91	1.13	1
	1	C1ORF75	ID_17148	0	1.71	1.94	1.81
	1	C1ORF55	ID_17194	0	1.09	1.11	0.67
	1	KIF3A	ID_17224	0	1.58	2.3	2.4
	1	C1ORF63	ID_17239	0	1.77	1.88	1.89
	1	RAP2A	ID_17271	0	1.23	1.3	1.27
	1	SERPINB9	ID_17282	0	4.9	3.95	2.85
	1	EEF1G	ID_17294	0	1.1	1.18	0.78
	1	EPB41L4B	ID_17309	0	1.55	3.09	2.41
	1	TUBD1	ID_17364	0	1.22	1.14	1.07
	1	C1ORF38	ID_17366	0	2.12	2.5	2.52
	1	FARP2	ID_17490	0	1.37	1.48	0.88
	1	ETNK1 /// LOC645102	ID_17550	0	0.82	1.03	0.95
	1	LOC90835	ID_17579	0	0.88	1.62	1.35
	1	LOC90826	ID_17596	0	0.92	1.56	1.07
	1	KATNB1	ID_17625	0	0.7	1.63	1.4
	1	SLAIN1	ID_17642	0	0.6	3.21	2.21
	1	SIRT7	ID_17695	0	1.14	1.25	1.14
	1	SH3BP5	ID_17699	0	1.4	1.29	1.04
	1	HSD17B7	ID_17819	0	1	1.61	1.27
	1	RASSF4	ID_17830	0	1.53	3.48	3.03
	1	RASSF5	ID_17831	0	3.81	3.05	2.24
	1	RASSF2	ID_17836	0	0.63	1.4	1.17
	1	TNFAIP6	ID_17865	0	1.79	3.04	2.16
	1	NBPF3	ID_17926	0	0.63	1.1	0.71
	1	ANKRD46	ID_18158	0	1.12	1.72	1.67
	1	SGEF	ID_18163	0	2.61	2.37	2.15
	1	CPOX	ID_18186	0	0.77	1.2	0.51
	1	L2HGDH	ID_18277	0	1.91	2.88	2.79
	1	MAP3K9	ID_18287	0	3.38	3.55	3.4
	1	RGS2	ID_18344	0	1.92	1.7	1.57
	1	LRRC16	ID_18365	0	1.24	1.43	1.23
	1	TWISTNB	ID_18372	0	1.18	1.24	1.23
	1	FLJ21062	ID_18427	0	2.38	2.81	2.7
	1	TRIM23	ID_18454	0	0.81	1.02	1.06
	1	RGL1	ID_18478	0	2.48	2.61	2.26
	1	SHQ1	ID_18577	0	1.13	1.12	0.68
	1	LOC91661	ID_18579	0	0.72	1.15	1.11
	1	TSEN54	ID_18645	0	1.46	1.73	1.52
	1	ADC	ID_18684	0	1.06	1.14	0.56
	1	AHR	ID_18742	0	1.23	1.68	1.59
	1	TRIM36	ID_18750	0	2.83	3.25	3.36
	1	RPAIN	ID_18752	0	0.88	1.5	1.4
	1	TRIM62	ID_18819	0	1.38	1.16	0.81
	1	LOC136288	ID_18918	0	3.53	5.14	3.93
	1	LOC90693	ID_18929	0	1.65	2.27	2.1
	1	SLC9A6	ID_18933	0	1.2	1.74	1.12
	1	MYEF2	ID_18976	0	1.26	2.3	2.06
	1	HSPA1A	ID_18977	0	1.84	1.84	1.73
	1	HSPA1B	ID_18978	0	2.95	2.61	2.44
	1	LOC440957	ID_19001	0	1.25	1.19	0.96
	1	C21ORF91	ID_19011	0	1.5	1.43	1.04
	1	ATG4B /// LOC653202	ID_19016	0	1.02	1.37	1.17
	1	SLC9A1	ID_19030	0	1.01	1.64	0.95
	1	C21ORF86	ID_19031	0	1.65	2.03	1.91
	1	LOC642730	ID_19045	0	0.8	1.06	0.85
	1	GUCY1B3	ID_19077	0	2.19	4.93	4.24
	1	PGRMC2	ID_19156	0	0.59	1.09	1.03
	1	IDH3A	ID_19202	0	0.81	1.8	1.29
	1	NOSIP	ID_19206	0	0.99	1.91	1.22
	1	PEX5	ID_19223	0	0.84	1.17	0.96
	1	PEX3	ID_19225	0	0.72	1.08	0.67
	1	RHOB	ID_19231	0	1.55	1.65	1.37
	1	IFIT1	ID_19284	0	1.26	1.84	1.9
	1	INSIG2	ID_19303	0	0.9	1.09	0.91
	1	CRY1	ID_19308	0	1.96	2.15	1.55
	1	HTATSF1	ID_19328	0	0.54	1.13	0.72
	1	POLR2B	ID_19381	0	0.71	1.1	1.05
	1	POLR3G	ID_19392	0	0.54	1.47	0.58
	1	BAMBI	ID_19420	0	2.91	3.34	3.03
	1	CROT	ID_19458	0	0.88	1.88	1.55
	1	SAP30	ID_19491	0	0.97	1.08	1.12
	1	ANKHD1 /// MASK-BP3	ID_19492	0	0.85	1.1	1.15
	1	LOC642852	ID_19580	0	1.58	1.94	1.98
	1	EPB41L2	ID_19631	0	0.95	1.79	1.25
	1	EPB41L1	ID_19633	0	0.37	1.13	0.65
	1	EPB41L5	ID_19636	0	1.79	3.1	2.53
	1	PPHLN1	ID_19657	0	0.7	1.03	0.92
	1	DNAJC6	ID_19685	0	1.57	2.03	1.14
	1	LUZP1	ID_19818	0	1.66	1.56	1.09
	1	FKSG30	ID_19827	0	0.34	1.1	0.54
	1	PPARGC1A	ID_19832	0	0.9	1.03	1.03
	1	FKSG24	ID_19841	0	0.79	1.88	0.99
	1	ULK4	ID_19927	0	1.13	1.67	0.99
	1	CTGF	ID_20001	0	1.01	1.29	1.04
	1	HEBP1	ID_20047	0	0.63	1.3	0.97
	1	GRASP	ID_20077	0	1.23	1.16	1.04
	1	HSPC049	ID_20085	0	1.85	1.51	1.13
	1	CTNS	ID_20120	0	1.76	2.16	1.47
	1	SLC7A5	ID_20133	0	0.7	1.53	0.63
	1	HOOK2	ID_20281	0	1.12	2.04	1.82
	1	SLC2A13	ID_20321	0	0.32	1.14	0.77
	1	C11ORF56	ID_20346	0	0.79	1.23	1.09
	1	CSRP2	ID_20358	0	0.5	1.48	1.19
	1	DNAJC16	ID_20382	0	0.7	1.16	0.92
	1	LOC158160	ID_20401	0	0.74	1.24	1.08
	1	PBX4	ID_20446	0	1.28	1.66	1.16
	1	TRIM34 /// TRIM6-TRI	ID_20484	0	0.7	1.5	1.23
	1	MGC16121	ID_20493	0	1.98	2.36	2.33
	1	CTR9	ID_20520	0	1.35	1.76	1.53
	1	KCTD13	ID_20534	0	1	1.57	1.45
	1	LOC253981	ID_20540	0	0.89	1.3	0.88
	1	MCTP2	ID_20543	0	1.56	2.41	2.01
	1	FLJ23569	ID_20555	0	1.01	1.44	1.48
