# Supplementary material for: Systematic Analysis of Time-Series Gene Expression Data on Tumor Cell-Selective Apoptotic Responses to HDAC Inhibitors
Source: Comput Math Methods Med. 2014 Oct 13;2014:867289. doi: 10.1155/2014/867289 (PMC4211306; doi:10.1155/2014/867289)
Supplement: Supplementary file 1 — Table S1. H-score of all pathways for tumor and normal samples: This table lists the name, category, website and H-score values for all 1307 pathway. Table S2. Illustrative pathways belonging to term "No responding": This table lists the name, category, website and TVPC patterns for "No responding" pathways. Table S3. Illustrative pathways belonging to term "Consistent responding": This table lists the name, category, website and TVPC patterns for "Consistent responding" pathways. Table S4. Illustrative pathways belonging to term "Tumor specific responding": This table lists the name, category, website and TVPC patterns for "Tumor specific responding" pathways. Table S5. Illustrative pathways belonging to term "Normal specific responding": This table lists the name, category, web site and TVPC patterns for "Normal specific responding" pathways. Table S6. Illustrative pathways belonging to term "Divergent responding": This table lists the name, category, website and TVPC patterns for "Divergent responding" pathways. Table S7. Genes within profile #0 for normal samples: This table contains all genes within profile #0 for normal samples, and lists the normalized expression data to the right of gene symbol. Table S8. Genes within profile #2 for normal samples: This table contains all genes within profile #2 for normal samples, and lists the normalized expression data to the right of gene symbol. Table S9. Genes within profile #9 for normal samples: This table contains all genes within profile #9 for normal samples, and lists the normalized expression data to the right of gene symbol. Table S10. Genes within profile #12 for normal samples: This table contains all genes within profile # 12 for normal samples, and lists the normalized expression data to the right of gene symbol. Table S11. Genes within profile #14 for normal samples: This table contains all genes within profile #14 for normal samples, and lists the normalized expression data to the right of gene symbol. Ta [file 867289.f1.zip › 867289.f1/Table S12.xls]

## Sheet: Sheet1
Gene Table for Profile 0 (0.0,-2.0,-3.0,-2.0) Tumor
Num. Genes Expected	Num. Genes Assigned	P-Value	Significant
579	318.8	1.2e-41	(significant)
-------
Selected	Weight	Gene Symbol	SPOT	0h	4h	12h	24h
	1	SNORA72	ID_9	0	-1.02	-1.31	-0.77
	1	ATN1	ID_51	0	-1.36	-2.11	-1.77
	1	DDX11 /// DDX12 ///	ID_54	0	-0.96	-1.14	-0.7
	1	PPAPDC1B	ID_55	0	-0.91	-1.7	-1.58
	1	PARP8	ID_72	0	-1.4	-2.04	-2.07
	1	PARP4	ID_76	0	-0.95	-2.16	-1.21
	1	PARP2	ID_82	0	-1.49	-1.07	-0.96
	1	SNORA28	ID_88	0	-0.67	-1.01	-0.75
	1	TMEM29 /// LOC653094	ID_106	0	-1.35	-1.86	-1.54
	1	FALZ	ID_123	0	-1.46	-1.46	-1.19
	1	LOC645052	ID_139	0	-0.97	-2.4	-1.71
	1	B3GNTL1	ID_176	0	-0.5	-1.04	-0.84
	1	TFE3	ID_197	0	-1.13	-1.21	-0.84
	1	ATF1	ID_205	0	-1.66	-1.16	-1.25
	1	QSER1	ID_210	0	-1.03	-1.25	-1.31
	1	SCN8A	ID_245	0	-1.4	-1.38	-1.58
	1	HDAC9	ID_246	0	-2.45	-3.83	-2.22
	1	ALS2CR16	ID_264	0	-0.97	-1.02	-0.93
	1	MGC14376	ID_328	0	-0.7	-1.31	-1.12
	1	PPAN	ID_356	0	-1.67	-1.7	-1.71
	1	VRK2	ID_358	0	-1.27	-1.37	-0.83
	1	MDC1	ID_418	0	-0.96	-1.17	-0.65
	1	NR1D2	ID_420	0	-0.93	-2.29	-1.79
	1	MDM2	ID_535	0	-1.2	-1.03	-1.24
	1	MDM4	ID_536	0	-1.23	-0.87	-0.79
	1	PTPRR	ID_605	0	-1.74	-2.31	-1.03
	1	GMEB2	ID_674	0	-2.2	-1.54	-1.39
	1	RPL10 /// LOC284393	ID_734	0	-2.02	-2.41	-2.13
	1	CCRL1	ID_783	0	-3.25	-4.01	-3.89
	1	NFYC	ID_803	0	-0.92	-1.07	-1.2
	1	EDD1 /// LOC642104	ID_933	0	-0.59	-1.13	-0.87
	1	C14ORF32	ID_950	0	-0.86	-0.89	-1.07
	1	ARNT2	ID_976	0	-1.77	-2.26	-2.16
	1	PTPN2	ID_1049	0	-1.16	-0.77	-0.66
	1	HNRPU	ID_1154	0	-0.45	-1.05	-0.9
	1	PATZ1	ID_1155	0	-1.44	-1.99	-1.87
	1	MCPH1	ID_1219	0	-2.62	-1.8	-2.42
	1	KIAA1949	ID_1239	0	-0.95	-1.22	-0.51
	1	PR47	ID_1277	0	-1.33	-1.3	-1.3
	1	IL8	ID_1298	0	-1.96	-2.77	-2.85
	1	PRCC	ID_1336	0	-1.03	-0.7	-0.78
	1	PRKY	ID_1467	0	-0.44	-1.16	-0.62
	1	C18ORF55	ID_1517	0	-0.88	-1.13	-0.73
	1	BIRC2	ID_1600	0	-0.98	-1.26	-1.09
	1	DNMT1	ID_1684	0	-0.7	-1.1	-1.01
	1	ZF	ID_1699	0	-1.03	-1.24	-0.86
	1	ZADH2	ID_1731	0	-1.22	-2.11	-1.62
	1	MGC5370	ID_1760	0	-1.13	-1.25	-1.31
	1	CDCA7	ID_1809	0	-1.5	-1.62	-1.61
	1	CDCA4	ID_1816	0	-0.84	-1.18	-1.1
	1	PDCD1LG2	ID_1825	0	-2.66	-3.51	-3.33
	1	CENTG1	ID_1829	0	-1.65	-1.56	-1.97
	1	DIDO1	ID_1850	0	-0.73	-1.35	-1.07
	1	CENTD1	ID_1858	0	-1.08	-2.02	-1.6
	1	CENTD3	ID_1861	0	-0.93	-0.84	-1.03
	1	FLJ10154	ID_1867	0	-0.77	-1.03	-0.69
	1	LOC652837	ID_1895	0	-2.17	-1.71	-2.33
	1	PLEKHG4	ID_1915	0	-0.9	-1.22	-0.74
	1	UNC50	ID_1947	0	-0.9	-1.45	-1.23
	1	SMYD5	ID_2160	0	-0.7	-1.16	-1.03
	1	SCHIP1	ID_2166	0	-1.25	-1.62	-1.25
	1	RBM39	ID_2203	0	-1.75	-1.76	-1.57
	1	RBM26	ID_2230	0	-1.14	-1.02	-0.85
	1	TBX3	ID_2236	0	-2.21	-2.41	-2.52
	1	RBM16	ID_2259	0	-2.27	-1.48	-1.38
	1	BXDC2	ID_2277	0	-1.16	-1.18	-0.95
	1	C20ORF72	ID_2302	0	-1.28	-0.95	-0.98
	1	C20ORF77	ID_2306	0	-1	-1.11	-0.93
	1	SETMAR	ID_2377	0	-1.44	-1.07	-1
	1	MCM3	ID_2410	0	-0.72	-1.22	-0.72
	1	MCM6	ID_2415	0	-0.6	-1	-0.87
	1	BTG3	ID_2424	0	-0.67	-1.01	-0.98
	1	DUS2L	ID_2430	0	-1.37	-1	-0.9
	1	BUD13	ID_2443	0	-1.87	-1.22	-1.35
	1	VPS54	ID_2483	0	-1.26	-2.04	-1.65
	1	GAS5	ID_2543	0	-1.02	-1.78	-1.4
	1	USP21	ID_2595	0	-1.28	-1.01	-1.3
	1	NFXL1	ID_2657	0	-0.98	-1	-1.1
	1	DTWD1	ID_2677	0	-1.54	-1.16	-1.36
	1	FLJ14803	ID_2684	0	-0.85	-1.21	-0.71
	1	LOC149773	ID_2717	0	-0.63	-1.27	-1.04
	1	VPS36	ID_2781	0	-2.23	-3.01	-2.82
	1	MSL2L1	ID_2811	0	-1.11	-0.84	-0.6
	1	DDX11	ID_2829	0	-0.97	-1	-0.7
	1	FBXO4	ID_2893	0	-1.83	-1.88	-2.01
	1	STAMBPL1	ID_3076	0	-1.54	-1.93	-1.62
	1	SYDE1	ID_3155	0	-1.4	-2.33	-2.22
	1	RCOR3	ID_3185	0	-1.12	-0.93	-0.64
	1	IL1R1	ID_3193	0	-1.04	-0.84	-1.06
	1	KIAA0528	ID_3219	0	-1.2	-1.1	-0.92
	1	LOC440092	ID_3220	0	-0.97	-1.24	-0.53
	1	RCBTB2	ID_3309	0	-1.37	-2.45	-2.26
	1	TAF1	ID_3348	0	-1.6	-1.56	-1.16
	1	PLK4	ID_3364	0	-1.24	-1.03	-0.86
	1	CLCF1	ID_3388	0	-0.88	-1.48	-1.38
	1	TDRD3	ID_3508	0	-1.76	-1.78	-2.16
	1	CCNT2	ID_3565	0	-1.71	-1.66	-1.53
	1	MGC4562	ID_3566	0	-0.94	-1.33	-1.22
	1	CAB39L	ID_3595	0	-1.4	-1.16	-0.8
	1	RABEP2 /// LOC652743	ID_3705	0	-1.5	-2.37	-2.36
	1	HOXA7	ID_3712	0	-2.04	-2.16	-2.53
	1	RNF12	ID_3713	0	-1.1	-1.56	-0.88
	1	HOXA9	ID_3716	0	-2.54	-3.15	-2.98
	1	HOXB2	ID_3740	0	-0.49	-1.1	-0.52
	1	LOC58489	ID_3754	0	-1.63	-2.26	-2.38
	1	LOC58486	ID_3769	0	-1.81	-1.61	-1.63
	1	USP9Y	ID_3814	0	-0.94	-1.34	-1.11
	1	LOC554203	ID_3826	0	-1.37	-1.58	-1.63
	1	KIAA0888	ID_3943	0	-0.86	-1.39	-1.02
	1	MANBAL	ID_3948	0	-0.82	-1.15	-0.53
	1	LOC126208	ID_3960	0	-1.46	-1.97	-0.83
	1	TCEAL1	ID_3971	0	-0.57	-1.27	-1.06
	1	KRTAP1-5 /// LOC6443	ID_3978	0	-3.08	-2.68	-3.1
	1	GTF3C3	ID_4103	0	-0.82	-1.06	-0.97
	1	FCMD	ID_4104	0	-0.58	-1.09	-1.01
	1	MLLT10	ID_4154	0	-1.47	-2.04	-2.11
	1	SNUPN	ID_4223	0	-1.31	-1.12	-1.35
	1	LOC440309	ID_4248	0	-1.37	-1.62	-1.51
	1	ASB1	ID_4299	0	-1.76	-2.29	-1.66
	1	EIF4B	ID_4330	0	-0.62	-1.22	-0.84
	1	SMARCAD1	ID_4378	0	-1.18	-1.46	-1.11
	1	PHTF1	ID_4427	0	-0.74	-1.75	-1.03
	1	C10ORF6	ID_4442	0	-1.07	-0.9	-0.92
	1	WDR90	ID_4444	0	-1.31	-1.12	-1.37
	1	NME6	ID_4446	0	-3.06	-2.18	-1.84
	1	SERTAD4	ID_4519	0	-1.25	-2.01	-1.36
	1	PRKCBP1	ID_4541	0	-2.76	-3.66	-3.73
	1	KIAA0776	ID_4556	0	-1.29	-1.53	-1.33
	1	DDX28	ID_4605	0	-1.42	-1.2	-0.84
	1	DDX20	ID_4620	0	-1.08	-1.35	-1.07
	1	DPH1 /// OVCA2	ID_4624	0	-0.56	-1.16	-0.98
	1	RP11-262H14.4	ID_4654	0	-1	-1.21	-1.19
	1	DDX3Y	ID_4661	0	-1.25	-1.51	-0.93
	1	RPL5 /// LOC647436	ID_4662	0	-0.47	-1.08	-0.56
	1	GINS3	ID_4671	0	-2.57	-1.7	-1.52
	1	POLE	ID_4808	0	-0.66	-1.02	-0.63
	1	LOC643109	ID_4863	0	-0.65	-1.46	-1.23
	1	POGK	ID_4875	0	-2.1	-2.25	-2.47
	1	TSSC4	ID_4914	0	-0.96	-1.21	-1.28
	1	SRRM2	ID_4922	0	-1.2	-1.04	-0.9
	1	KIAA0753	ID_4932	0	-0.77	-1.1	-0.42
	1	PLCB4	ID_4997	0	-0.98	-1.14	-1.15
	1	ARPM1	ID_5043	0	-0.79	-1.03	-0.7
	1	ZNF785	ID_5080	0	-1.45	-1.52	-1.52
	1	FLJ10815	ID_5126	0	-0.55	-1.04	-0.92
	1	ZNF746	ID_5141	0	-1.49	-1.1	-1.44
	1	ZNF764	ID_5182	0	-2.16	-1.63	-1.48
	1	SETD1B	ID_5251	0	-1.97	-2.5	-2.03
	1	CDKN1B	ID_5295	0	-1.16	-1.51	-1.49
	1	FBXO30	ID_5297	0	-1.09	-1.29	-1.42
	1	UBXD6	ID_5307	0	-1.13	-2.25	-1.42
	1	DDX11 /// LOC652053	ID_5335	0	-0.88	-1.37	-0.52
	1	SNX13	ID_5356	0	-0.88	-1.2	-0.87
	1	UBE2R2	ID_5368	0	-0.95	-0.98	-1.09
	1	EDD1	ID_5395	0	-0.52	-1.18	-0.86
	1	SENP6	ID_5488	0	-1.8	-3.64	-3.12
	1	SENP1	ID_5527	0	-0.59	-1.28	-1.09
	1	LOC150837	ID_5552	0	-2.24	-2.34	-2.14
	1	PCTK2	ID_5554	0	-1.35	-1.52	-1.62
	1	PTGIR	ID_5602	0	-1.11	-1.03	-0.86
	1	ATOH8	ID_5608	0	-1.67	-1.57	-1.88
	1	QTRTD1	ID_5650	0	-0.99	-1.15	-1.16
	1	PGGT1B	ID_5654	0	-1.05	-2.07	-1.86
	1	CARD4	ID_5677	0	-0.56	-1.07	-0.79
	1	RRS1	ID_5691	0	-0.74	-0.95	-1.03
	1	FAM60A	ID_5767	0	-1.37	-1.84	-1.42
	1	KIAA1276	ID_5793	0	-0.46	-1.26	-0.63
	1	KRR1	ID_5810	0	-0.9	-0.84	-1.06
	1	VEZF1	ID_5848	0	-1	-0.76	-0.57
	1	NOB1	ID_5931	0	-0.92	-1.28	-1.12
	1	KIAA1240	ID_5953	0	-1.35	-1.56	-1.49
	1	IFT140	ID_6069	0	-1.27	-1.5	-0.98
	1	SUV39H1	ID_6076	0	-2.3	-1.54	-1.76
	1	FLJ38717	ID_6150	0	-1.64	-1.88	-1.79
	1	RP11-262H14.4 /// LO	ID_6165	0	-0.66	-1.35	-1.11
	1	STRN3	ID_6221	0	-1.34	-1.11	-1.17
	1	STRN4	ID_6223	0	-1.16	-1.31	-1.36
	1	KIAA0141	ID_6224	0	-1.04	-1.36	-1.02
	1	C6ORF111	ID_6256	0	-1.5	-1.75	-1.19
	1	BCAR3	ID_6387	0	-2.9	-3.45	-2.89
	1	RAD51L3	ID_6447	0	-1.43	-1.38	-1.72
	1	C3ORF63	ID_6534	0	-1.19	-1.32	-1.21
	1	CENPO	ID_6559	0	-1.1	-1.06	-1.01
	1	C3ORF59	ID_6587	0	-1.69	-2.26	-2.28
	1	ZNF507	ID_6626	0	-1.64	-1.62	-0.92
	1	ZNF532	ID_6730	0	-2.09	-3.88	-3.59
	1	C19ORF48	ID_6743	0	-0.62	-1.1	-0.93
	1	TCTE3	ID_6766	0	-1.19	-2.01	-1.21
	1	C17ORF27	ID_6862	0	-0.74	-1.26	-1.16
	1	ZNF588	ID_6877	0	-1.01	-0.79	-0.96
	1	LOC644655	ID_6908	0	-1.89	-3.37	-3.08
	1	LOC644656	ID_6910	0	-2.02	-2.73	-2
	1	NIPSNAP3A	ID_6932	0	-0.99	-1.35	-0.65
	1	NSUN4	ID_7001	0	-1.57	-1.27	-1.12
	1	C1ORF107	ID_7055	0	-1.18	-1.52	-1.54
	1	SLC24A1	ID_7166	0	-0.67	-1.01	-0.38
	1	RAB11FIP2	ID_7187	0	-1.62	-1.69	-1.15
	1	C1ORF164	ID_7213	0	-0.95	-1.12	-1.28
	1	C1ORF163	ID_7218	0	-1.67	-1.31	-1.32
	1	MYST2	ID_7250	0	-2.03	-1.42	-1.39
	1	MYST4	ID_7252	0	-1.92	-1.57	-1.14
	1	MRPS18B	ID_7270	0	-1.16	-1.39	-1.43
	1	AKAP8	ID_7277	0	-2.03	-1.68	-1.63
	1	AKAP1	ID_7278	0	-0.84	-1.08	-1.14
	1	KIAA0460	ID_7299	0	-1.4	-2.08	-1.72
	1	SLC39A7	ID_7370	0	-0.46	-1.07	-0.89
	1	FLJ36031	ID_7388	0	-2.04	-1.91	-1.54
	1	BRPF3	ID_7415	0	-1.53	-1.58	-1.68
	1	LOC389830 /// LOC642	ID_7537	0	-0.87	-1.3	-0.5
	1	ZNF689	ID_7568	0	-2.4	-1.82	-1.89
	1	ZNF655	ID_7600	0	-1.18	-2.16	-0.87
	1	ZNF652	ID_7605	0	-1.26	-1.7	-1.81
	1	ZNF32	ID_7606	0	-1.28	-1.6	-1.25
	1	SH3TC2	ID_7707	0	-1.46	-1.46	-1.46
	1	FOSL2	ID_7723	0	-1.06	-2.08	-1.46
	1	FOSL1	ID_7740	0	-3.17	-4.59	-3.66
	1	SFRS4	ID_7820	0	-1.71	-1.88	-1.95
	1	SFRS5	ID_7822	0	-0.61	-1.35	-0.79
	1	LAMC2	ID_7847	0	-1.09	-2.39	-1.51
	1	PTPN14	ID_7877	0	-1.12	-1.85	-1.53
	1	PTPN12	ID_7884	0	-1.53	-1.78	-1.72
	1	NPAL2	ID_7920	0	-1.79	-2.31	-2.46
	1	CLDN12	ID_7954	0	-0.96	-1.25	-1.27
	1	KIAA0391	ID_7963	0	-0.61	-1.09	-0.66
	1	DHX35	ID_8144	0	-1.5	-2.15	-1.57
	1	PTBP2	ID_8145	0	-2.05	-3.13	-3.11
	1	ZNF384	ID_8169	0	-1.21	-0.99	-0.79
	1	ZNF343	ID_8233	0	-1.34	-1.27	-0.81
	1	ZC3H7A	ID_8258	0	-1.42	-1.44	-1.13
	1	ZNF335	ID_8273	0	-1.2	-1.05	-0.82
	1	ZNF33B	ID_8289	0	-2.17	-1.9	-2.5
	1	KIAA1737	ID_8300	0	-0.54	-1.1	-0.64
	1	ZNF300	ID_8394	0	-1.92	-2.04	-2.24
	1	FMR1	ID_8412	0	-0.59	-1.01	-0.95
	1	RNASEH2B	ID_8421	0	-1.09	-1.86	-1.64
	1	BICD1	ID_8423	0	-0.74	-1.89	-1.28
	1	RNF169	ID_8463	0	-1.98	-1.95	-1.91
	1	TRAF3IP2	ID_8474	0	-1.56	-2.41	-2.39
	1	NRG1	ID_8519	0	-0.85	-1.75	-1.58
	1	ARID2	ID_8537	0	-1.3	-2.57	-1.34
	1	HIAT1	ID_8564	0	-1.74	-2.15	-2.15
	1	GJA7	ID_8694	0	-0.87	-1.52	-1.42
	1	CXCL1	ID_8729	0	-3.57	-3.34	-3.89
	1	CXCL3	ID_8737	0	-5.17	-5.14	-4.74
	1	CXCL2	ID_8739	0	-4.42	-4.02	-4.02
	1	RAD21	ID_8797	0	-1.07	-1.36	-1.46
	1	CDK10	ID_8865	0	-0.81	-1.24	-0.83
	1	LOC389289	ID_8874	0	-2.75	-2.96	-3.15
	1	ZZZ3	ID_8963	0	-2.18	-1.78	-1.73
	1	C15ORF37	ID_8996	0	-1.1	-0.91	-1.07
	1	C15ORF44	ID_9004	0	-1.77	-2.01	-2.06
	1	SYMPK	ID_9049	0	-1.06	-1.25	-1.04
	1	EXOSC8	ID_9054	0	-0.82	-1.44	-1.31
	1	PUM2	ID_9147	0	-1.22	-1.1	-1.14
	1	TNFRSF12A	ID_9179	0	-1.14	-1.96	-1.45
	1	ZNF415	ID_9214	0	-1.57	-1.27	-1.67
	1	CDK3	ID_9261	0	-1.7	-1.47	-1.9
	1	ZC3HC1	ID_9352	0	-1.19	-1.19	-1.25
	1	LIF	ID_9375	0	-2.69	-2.19	-2.41
	1	CDT1	ID_9412	0	-0.77	-1.03	-0.61
	1	YAF2	ID_9462	0	-0.55	-1.28	-0.91
	1	RP11-93B10.1	ID_9492	0	-1.08	-1.38	-1.08
	1	GTF2IRD1	ID_9503	0	-1.31	-1.57	-1.37
	1	KIAA1604	ID_9518	0	-1.07	-1.01	-1.05
	1	KIAA1609	ID_9522	0	-1.33	-1.27	-0.76
	1	LOC644010	ID_9524	0	-1.31	-1.45	-1.17
	1	TXNDC13	ID_9539	0	-0.67	-1.07	-0.89
	1	DPY19L4	ID_9550	0	-0.49	-1.18	-0.99
	1	CXORF45	ID_9575	0	-1.53	-2.04	-1.59
	1	MUS81	ID_9592	0	-0.51	-1.13	-0.85
	1	RYR3	ID_9657	0	-2.22	-1.6	-1.62
	1	RCCD1	ID_9691	0	-0.94	-1.07	-0.75
	1	KIAA1553	ID_9744	0	-1.85	-1.57	-1.79
	1	PAPD1	ID_9775	0	-1.7	-1.3	-1.17
	1	C19ORF7	ID_9781	0	-2.45	-2.54	-1.89
	1	KIAA1546	ID_9814	0	-1.85	-2.65	-2.3
	1	FKRP	ID_9857	0	-1.48	-2.3	-2.17
	1	KIAA1586	ID_9863	0	-2.33	-1.51	-1.4
	1	LOC285628	ID_9905	0	-3.65	-4.2	-3.48
	1	MAF	ID_9945	0	-1.6	-1.11	-1.1
	1	TMEM18	ID_9957	0	-1.02	-1.66	-1.38
	1	TMEM17	ID_9966	0	-1.94	-2.87	-1.53
	1	C7ORF49	ID_9989	0	-1.72	-1.39	-1.41
	1	GLI3	ID_10093	0	-0.75	-1.64	-1.11
	1	LOC644192	ID_10164	0	-1.07	-1.93	-1.81
	1	DKFZP564J0863	ID_10304	0	-1.03	-1.62	-1.52
	1	TMEM44	ID_10425	0	-1.23	-1.86	-1.84
	1	LOC255480	ID_10430	0	-1.19	-0.8	-0.97
	1	LUC7L2	ID_10459	0	-1.49	-1.36	-1.31
	1	LOC285735	ID_10481	0	-1.31	-1.44	-1.42
	1	ZNF239	ID_10488	0	-1.55	-1.32	-1.23
	1	ZNF217	ID_10524	0	-1.08	-0.79	-0.8
	1	ZC3HAV1L	ID_10559	0	-2.32	-2.59	-2.86
	1	CMTM3	ID_10668	0	-1.26	-2.31	-2.13
	1	HLX1	ID_10690	0	-1.05	-1.39	-1.16
	1	ZNF202	ID_10759	0	-0.87	-1.02	-1.14
	1	TRIM6	ID_10776	0	-0.61	-1.39	-0.27
	1	NDP	ID_10813	0	-2.22	-2.71	-2.5
	1	C13ORF25	ID_10833	0	-4.32	-5.46	-4.93
	1	NOV	ID_10857	0	-0.99	-1.07	-1.04
	1	CDGAP	ID_10893	0	-0.83	-1.81	-1.56
	1	ZFX /// ZFY	ID_10904	0	-3.08	-3.53	-3.47
	1	AGBL3	ID_10905	0	-0.53	-1.28	-0.5
	1	SLC36A4	ID_10925	0	-0.98	-1.36	-1.23
	1	ZFYVE9	ID_10939	0	-1.13	-1.38	-0.8
	1	CBX3	ID_11015	0	-1.39	-2.4	-2.34
	1	MUTYH	ID_11030	0	-0.99	-1.12	-1.23
	1	CASD1	ID_11059	0	-2.29	-3.31	-2.86
	1	LOC644250	ID_11146	0	-2.78	-2.87	-3
	1	APRIN	ID_11171	0	-1.07	-1.03	-0.99
	1	SART3	ID_11174	0	-0.79	-1.04	-0.83
	1	AMOTL2	ID_11177	0	-2.04	-1.57	-1.18
	1	SARS2	ID_11198	0	-1.41	-0.93	-1.03
	1	NAV3 /// LOC652725	ID_11212	0	-2.96	-4.65	-4.5
	1	ADNP	ID_11253	0	-2.92	-2.65	-2.21
	1	ARMCX5	ID_11281	0	-1.95	-1.51	-1.55
	1	CSGLCA-T	ID_11307	0	-0.5	-1.01	-0.53
	1	RABGGTB	ID_11326	0	-1.16	-1.16	-1.09
	1	BAZ1B	ID_11434	0	-0.9	-1.15	-1.26
	1	LETMD1	ID_11467	0	-1.08	-1.23	-0.77
	1	OCIAD1	ID_11477	0	-0.53	-1.04	-0.46
	1	CPEB2	ID_11500	0	-1.89	-2.96	-2.35
	1	FAM113A	ID_11524	0	-0.97	-1.16	-1.03
	1	LOC130502	ID_11540	0	-0.49	-1.17	-0.46
	1	C10ORF32	ID_11560	0	-1.39	-1.45	-1.19
	1	SLTM	ID_11630	0	-1.6	-1.54	-1.57
	1	TNIP1	ID_11713	0	-0.68	-1.53	-0.89
	1	LOC286334	ID_11744	0	-1.46	-2.05	-2.05
	1	TUBGCP5	ID_11755	0	-1.02	-0.92	-0.9
	1	ADAMTS6	ID_11799	0	-3.25	-4.41	-4.4
	1	ADAMTS1	ID_11804	0	-2.82	-3.52	-3.42
	1	LOC283658	ID_11832	0	-1.05	-0.71	-0.93
	1	NUBP1	ID_11857	0	-0.47	-1	-0.61
	1	MIER3	ID_11914	0	-1.4	-1.24	-0.77
	1	XDH	ID_11931	0	-0.95	-1.2	-1.24
	1	SASS6	ID_11990	0	-1.53	-1.47	-1.5
	1	KIF7	ID_12015	0	-0.66	-1.24	-0.69
	1	FASTKD2	ID_12058	0	-1.23	-1.56	-1.36
	1	PAN3	ID_12077	0	-1.13	-1.47	-1.08
	1	NUDT13	ID_12079	0	-2.68	-2.48	-2.45
	1	TBX15	ID_12158	0	-1.57	-1.19	-1.3
	1	WDR42A	ID_12198	0	-1.68	-1.99	-1.91
	1	SATB2	ID_12240	0	-0.99	-2.04	-1.78
	1	SOCS6	ID_12247	0	-1.9	-2.43	-2.32
	1	SOCS5	ID_12250	0	-1.81	-1.89	-1
	1	MTX3	ID_12387	0	-1.2	-1.81	-1.54
	1	SFRS12	ID_12399	0	-2.01	-2.32	-2.14
	1	LOC152742	ID_12459	0	-1.1	-0.85	-1.06
	1	NHLRC2	ID_12473	0	-1.17	-1.1	-1.26
	1	SFRS2B	ID_12597	0	-1.09	-2.05	-1.86
	1	RIF1	ID_12620	0	-0.82	-1.14	-0.76
	1	TOM1L1	ID_12777	0	-0.74	-1.06	-0.82
	1	C1ORF119 /// LOC6530	ID_12795	0	-0.54	-1.03	-0.76
	1	HMG2L1	ID_12859	0	-2.08	-1.89	-1.84
	1	UBE3A	ID_12911	0	-0.9	-1.01	-1.17
	1	TEX264	ID_12918	0	-1.08	-0.99	-1.2
	1	L3MBTL2	ID_12928	0	-0.57	-1.09	-1.03
	1	EME2	ID_12981	0	-1.69	-1.22	-1.37
	1	KCNK2	ID_12988	0	-1.7	-2.53	-2.29
	1	TTC31	ID_13037	0	-1.04	-1.35	-1.19
	1	TTC14	ID_13105	0	-0.67	-1.07	-0.43
	1	2014-03-07	ID_13111	0	-0.95	-0.99	-1.07
	1	ZBTB4	ID_13127	0	-0.64	-1.03	-0.83
	1	ZBTB2	ID_13130	0	-2.66	-4.66	-4.52
	1	ZBTB1	ID_13132	0	-2.55	-2.8	-2.07
	1	PQLC2	ID_13167	0	-0.55	-1.01	-0.79
	1	WEE1	ID_13185	0	-0.99	-1.39	-0.68
	1	NIPBL	ID_13209	0	-0.93	-1.01	-1.05
	1	RSNL2	ID_13215	0	-1.95	-3.33	-1.81
	1	ZFY	ID_13246	0	-2.21	-2.67	-2.37
	1	ZFX	ID_13248	0	-2.27	-2.37	-2.24
	1	CHD2	ID_13282	0	-1.03	-2.47	-0.66
	1	FAM26B	ID_13292	0	-1.62	-2.96	-2.69
	1	DKK1	ID_13425	0	-3.65	-3.4	-2.21
	1	PPP1R8	ID_13427	0	-1.26	-0.86	-0.85
	1	LOC286437	ID_13444	0	-1.06	-0.83	-1.04
	1	ELK3	ID_13471	0	-1.22	-1.9	-1.4
	1	WDR6	ID_13500	0	-1.19	-1.8	-1.43
	1	KCNQ5	ID_13516	0	-1.41	-1.29	-1.35
	1	TTMB	ID_13559	0	-1.65	-3.59	-2.79
	1	SETD6	ID_13578	0	-0.69	-1.35	-1.15
	1	SETD2	ID_13583	0	-0.71	-1.39	-1.22
	1	ISG20L1	ID_13609	0	-0.93	-1.24	-1.14
	1	KBTBD2	ID_13627	0	-1.25	-1.39	-1.01
	1	PHF17	ID_13732	0	-1.37	-1.44	-1.32
	1	PHF15	ID_13744	0	-2.27	-3.64	-3.44
	1	LOC153684	ID_13817	0	-1.1	-1.64	-1.65
	1	FLJ31306	ID_13840	0	-1.02	-1.09	-0.73
	1	FLJ43489	ID_13843	0	-1.64	-1.47	-1.41
	1	CEP192	ID_13852	0	-0.75	-1.14	-0.98
	1	TK2	ID_13892	0	-1.49	-1.09	-1.46
	1	DLX1	ID_13912	0	-1.44	-1.87	-1.36
	1	THG1L	ID_13949	0	-1.24	-0.85	-0.82
	1	C5ORF26	ID_14048	0	-0.77	-1.32	-0.62
	1	RAD51AP1	ID_14104	0	-1.17	-1.52	-1.26
	1	LOC152485	ID_14105	0	-3.23	-3.93	-3.66
	1	KIFC3	ID_14133	0	-0.57	-1.2	-0.96
	1	C9ORF23	ID_14192	0	-1.07	-0.99	-0.82
	1	LOC339287	ID_14214	0	-2.38	-2.65	-2.64
	1	APOL6	ID_14225	0	-1.22	-1.64	-1.46
	1	SRGAP1	ID_14250	0	-1.09	-1.73	-1.69
	1	ARID1A	ID_14302	0	-1.85	-2.43	-2.6
	1	GRINL1A /// GCOM1 //	ID_14407	0	-1.01	-1.11	-1.1
	1	TRIO	ID_14489	0	-1.06	-2.04	-1.79
	1	SNAPC5	ID_14508	0	-0.94	-1.41	-1.05
	1	FLJ35776	ID_14535	0	-0.66	-1.03	-0.76
	1	ERBB2IP	ID_14562	0	-0.91	-1.3	-0.64
	1	C9ORF91	ID_14604	0	-1.27	-1.57	-1.62
	1	SRC	ID_14627	0	-0.48	-1.01	-0.84
	1	EPC1	ID_14804	0	-3.23	-3.6	-3.68
	1	EPC2	ID_14805	0	-2.36	-2.44	-1.59
	1	LIN9	ID_14896	0	-1.31	-1.06	-0.77
	1	INOC1	ID_14903	0	-1.3	-1.57	-1.23
	1	WAC	ID_14906	0	-1.02	-1.11	-0.96
	1	PHLDA1	ID_14909	0	-2.23	-2.18	-2.15
	1	TFAP2A	ID_14939	0	-1.61	-1.84	-1.93
	1	ABL1	ID_14973	0	-0.91	-0.86	-1.01
	1	DENND4B	ID_15019	0	-1.02	-1.44	-1.19
	1	FLJ34870	ID_15035	0	-1.15	-1.75	-1.43
	1	C4ORF18	ID_15052	0	-1.03	-0.69	-0.92
	1	ZBTB33	ID_15094	0	-1.19	-1.74	-1.74
	1	TOE1	ID_15169	0	-2.25	-2.84	-2.76
	1	TTTY15	ID_15210	0	-1.01	-0.77	-0.76
	1	CLPX	ID_15242	0	-1.2	-1.08	-1.04
	1	CCDC16	ID_15251	0	-1.03	-0.72	-0.62
	1	CCDC59	ID_15382	0	-1.19	-1.25	-1.44
	1	GSPT2	ID_15416	0	-1.82	-1.92	-1.81
	1	SLC28A3	ID_15480	0	-0.86	-1	-0.98
	1	SPG20	ID_15504	0	-0.7	-1.25	-0.98
	1	FADS1	ID_15540	0	-0.74	-1.48	-0.76
	1	PDZRN3	ID_15545	0	-1.63	-1.14	-1.54
	1	RFXDC2	ID_15600	0	-1.41	-1.44	-1.75
	1	TCERG1	ID_15612	0	-1.17	-1.77	-1.52
	1	BCDIN3	ID_15773	0	-2.85	-3.28	-3.16
	1	MRPL54	ID_15793	0	-0.68	-1.21	-1.17
	1	TSEN2	ID_15826	0	-0.96	-1.17	-1.01
	1	SIAH1	ID_15837	0	-1.47	-1.24	-1.2
	1	KIAA2010	ID_15936	0	-1.52	-1.85	-1.91
	1	LOC284952	ID_15968	0	-0.84	-1.2	-0.94
	1	PPP1R15A	ID_15991	0	-1.44	-2.42	-2.31
	1	VPRBP	ID_16037	0	-1.49	-1.09	-1.36
	1	DUSP12	ID_16059	0	-0.96	-1.32	-1.27
	1	LOC402560	ID_16074	0	-1.82	-4.15	-3.64
	1	BNC1	ID_16154	0	-1.49	-2.58	-2.45
	1	COCH	ID_16182	0	-1.25	-1.08	-1.39
	1	E2F3	ID_16219	0	-1.79	-1.89	-2.06
	1	E2F8	ID_16231	0	-1.68	-1.45	-1.14
	1	ZFP91	ID_16294	0	-1.42	-1.12	-0.88
	1	HAS2	ID_16317	0	-5.5	-5.97	-6.16
	1	COIL	ID_16342	0	-2.13	-1.86	-2.2
	1	ZFP37	ID_16398	0	-1.25	-0.88	-0.7
	1	COG7	ID_16420	0	-0.92	-1.24	-1.26
	1	WNT3	ID_16443	0	-0.76	-1.11	-0.71
	1	TMPO	ID_16493	0	-1.06	-1.84	-1.76
	1	PCBP1	ID_16509	0	-0.89	-1.15	-0.89
	1	C16ORF53	ID_16543	0	-1.41	-1.97	-2.09
	1	C16ORF28	ID_16594	0	-1.51	-1.07	-1.19
	1	IRAK1BP1	ID_16653	0	-0.83	-1.28	-1.25
	1	CCDC102A	ID_16671	0	-0.49	-1.04	-0.86
	1	MGC4677	ID_16711	0	-1.5	-2.55	-1.61
	1	MGC4655	ID_16746	0	-1.3	-3.22	-2.33
	1	LOC541471	ID_16755	0	-0.94	-1.37	-1.19
	1	SPBC24	ID_16800	0	-1.02	-0.75	-1.09
	1	YARS2	ID_16805	0	-1.24	-1.56	-1.59
	1	LEPR	ID_16858	0	-0.85	-1	-0.42
	1	RFWD3	ID_16874	0	-1.18	-0.82	-0.86
	1	FRMD4B	ID_16877	0	-0.93	-1.1	-1.07
	1	IFNE1	ID_16903	0	-1.69	-3.43	-2.7
	1	ALS2CR8	ID_16953	0	-1.7	-1.61	-1.75
	1	HOXA10	ID_16959	0	-1.27	-1.46	-1.5
	1	SMAD1	ID_16976	0	-2.55	-2.58	-2.47
	1	MGC16385	ID_16994	0	-1.68	-1.66	-1.5
	1	SHROOM1	ID_17011	0	-1.15	-1.75	-1.33
	1	HNRPA3	ID_17047	0	-0.86	-1.5	-1.25
	1	QRICH1	ID_17066	0	-1.06	-0.79	-0.61
	1	PIGW	ID_17098	0	-1.11	-2.51	-0.96
	1	EPB41L4A	ID_17307	0	-0.8	-1.41	-1.17
	1	REV1L	ID_17351	0	-1.01	-0.95	-0.73
	1	LOC203107	ID_17352	0	-0.55	-1.19	-0.33
	1	SPRY2	ID_17386	0	-1.73	-2.29	-2.17
	1	RAF1	ID_17446	0	-0.77	-1.45	-1.33
	1	RGNEF /// LOC643607	ID_17485	0	-0.62	-1.06	-0.99
	1	CRKRS	ID_17486	0	-1.01	-0.76	-0.62
	1	ETS1	ID_17520	0	-1.15	-2.03	-1.69
	1	PHIP	ID_17561	0	-1.04	-1.36	-1.31
	1	PHC3	ID_17661	0	-1.12	-0.76	-0.73
	1	INTS2	ID_17714	0	-1.56	-1.09	-0.94
	1	INTS3	ID_17717	0	-0.77	-1.36	-0.54
	1	C14ORF4	ID_17723	0	-1.18	-1.55	-1.55
	1	INTS6	ID_17733	0	-1.5	-1.02	-0.97
	1	TLK1	ID_17734	0	-1.59	-2.79	-2.41
	1	PPP1R3E	ID_17759	0	-0.39	-1	-0.66
	1	TADA2L	ID_17810	0	-1.92	-1.45	-1.54
	1	RASSF1	ID_17834	0	-0.41	-1.1	-0.72
	1	RBM5	ID_17845	0	-1.04	-1.45	-1.06
	1	RBM7	ID_17849	0	-1.59	-1.31	-1.42
	1	NDUFS2	ID_17931	0	-0.67	-1	-1.02
	1	TAS2R14	ID_17944	0	-1.65	-1.69	-1.52
	1	BCLAF1	ID_17959	0	-0.82	-1.35	-1.05
	1	TAS2R45	ID_17970	0	-1.01	-0.75	-0.95
	1	CHEK1	ID_18032	0	-1.17	-0.98	-1.18
	1	MGC16597	ID_18036	0	-1.42	-1.06	-1.22
	1	NHSL1	ID_18052	0	-2.63	-3.29	-3.47
	1	C12ORF30	ID_18053	0	-1.41	-1.75	-1.68
	1	ANKRD15	ID_18066	0	-2.99	-3.82	-3.46
	1	ANKRD55	ID_18173	0	-1.46	-2.18	-1.78
	1	KEAP1	ID_18203	0	-2.5	-3.1	-3.1
	1	MCRS1	ID_18296	0	-0.49	-1.17	-0.71
	1	SFMBT1	ID_18336	0	-1.88	-1.92	-2.25
	1	BRF2	ID_18383	0	-0.77	-1.02	-0.56
	1	CSF3	ID_18406	0	-3.43	-4.59	-4.21
	1	CSF2	ID_18407	0	-2.22	-3.01	-2.53
	1	TRIM13	ID_18418	0	-2.06	-2.59	-1.98
	1	LRRC34	ID_18420	0	-0.99	-2.18	-1.62
	1	TRIM22	ID_18456	0	-0.95	-1.75	-1.44
	1	C4ORF8	ID_18465	0	-1.38	-1.47	-1.61
	1	TOPBP1	ID_18496	0	-1	-1.06	-1.03
	1	ZCCHC8	ID_18553	0	-1.22	-0.97	-0.78
	1	ZCCHC3	ID_18555	0	-1.51	-1.98	-1.68
	1	OTUD4	ID_18567	0	-1.26	-1.35	-1.03
	1	DNAJB12	ID_18606	0	-0.92	-1.75	-1.32
	1	LMNB1	ID_18634	0	-1.63	-3	-2.78
	1	AIP	ID_18719	0	-0.47	-1.05	-0.93
	1	ARL6IP5	ID_18795	0	-0.42	-1.01	-0.87
	1	PDCD2	ID_18846	0	-0.83	-1.67	-0.85
	1	DGCR8	ID_18854	0	-1.06	-1.32	-1.07
	1	BRCC2	ID_18869	0	-2.58	-2.47	-2.55
	1	ZFP161	ID_18885	0	-2.13	-1.51	-1.2
	1	ZC3H12C	ID_18910	0	-2.43	-4.05	-4.02
	1	LOC440944	ID_18919	0	-1.13	-1.92	-1.28
	1	ZC3H11A	ID_18925	0	-1.03	-1.09	-1.12
	1	BHLHB2	ID_18950	0	-1.39	-2.34	-1.72
	1	ZHX2	ID_18959	0	-1.93	-1.82	-2.19
	1	ZHX3	ID_18961	0	-1.33	-1.44	-1.63
	1	CDC42EP1	ID_18983	0	-1.31	-2.45	-2.02
	1	NUP205	ID_19073	0	-0.65	-1.22	-1.02
	1	XPO1	ID_19140	0	-0.93	-1.56	-0.84
	1	ZIC1	ID_19149	0	-1.31	-0.85	-0.76
	1	SIX5	ID_19165	0	-1.6	-1.17	-1.52
	1	XPOT	ID_19193	0	-0.66	-1.11	-1
	1	FLJ12886	ID_19233	0	-0.76	-1.24	-1
	1	NCOA5	ID_19258	0	-1.17	-1.73	-1.47
	1	NCOA6	ID_19259	0	-1.33	-1.05	-1.12
	1	FLJ20309	ID_19298	0	-2	-1.47	-1.94
	1	NUP50	ID_19329	0	-1.31	-1.65	-1.41
	1	NUP62	ID_19340	0	-2.03	-1.42	-1.64
	1	FCRLB	ID_19366	0	-0.77	-1.41	-0.56
	1	RPL17 /// LOC642250	ID_19470	0	-1.02	-2.13	-1.46
	1	ZMYM3	ID_19477	0	-1.18	-1.1	-1.09
	1	ZMYM6	ID_19478	0	-0.96	-1.11	-1.02
	1	JARID1D	ID_19569	0	-1	-1.32	-1.25
	1	FUSIP1 /// LOC642558	ID_19585	0	-1.05	-0.71	-0.73
	1	ASXL1	ID_19597	0	-1.84	-1.98	-1.72
	1	SMURF1	ID_19605	0	-0.81	-1.01	-0.57
	1	PDHX	ID_19651	0	-1.12	-1.04	-1.22
	1	FLJ21272	ID_19660	0	-2.71	-4.4	-4.29
	1	FLJ12529	ID_19721	0	-1.11	-1.17	-1.03
	1	IRF2BP2	ID_19783	0	-1.49	-2.4	-1.83
	1	LOC147650	ID_19806	0	-1.23	-1.08	-0.76
	1	TGIF	ID_19833	0	-1.17	-1.11	-1.3
	1	LRCH1	ID_19838	0	-1.18	-1.64	-1.71
	1	SLC39A10	ID_19887	0	-0.69	-1.58	-1.41
	1	PGM5P1	ID_19964	0	-0.84	-1.77	-1.06
	1	HTATIP	ID_20013	0	-0.96	-1.03	-0.71
	1	PCNT	ID_20038	0	-1.17	-2.11	-1.12
	1	TIMM9	ID_20139	0	-0.95	-1.22	-1.13
	1	TOMM40L	ID_20193	0	-1.34	-1.24	-1.29
	1	MID1IP1	ID_20222	0	-1.59	-1.16	-1.19
	1	PRO1843	ID_20234	0	-0.72	-1.05	-0.53
	1	AADAT	ID_20292	0	-0.65	-1.06	-0.69
	1	CREBBP	ID_20354	0	-1.38	-1.65	-1.52
	1	AHSA2	ID_20370	0	-2.15	-2.29	-2.44
	1	C11ORF46	ID_20374	0	-1.28	-1.44	-1.4
	1	DNAJC13	ID_20383	0	-0.66	-1.03	-1.01
	1	FLJ11184	ID_20391	0	-0.74	-1.13	-1.12
	1	PBX3	ID_20444	0	-1.47	-1.6	-1.38
	1	WIBG	ID_20459	0	-0.92	-0.96	-1.09
	1	HECTD2	ID_20498	0	-1.12	-2.2	-2.04
	1	ENDOGL1	ID_20599	0	-1.44	-1.13	-1.29
