# Supplementary material for: Systematic Analysis of Time-Series Gene Expression Data on Tumor Cell-Selective Apoptotic Responses to HDAC Inhibitors
Source: Comput Math Methods Med. 2014 Oct 13;2014:867289. doi: 10.1155/2014/867289 (PMC4211306; doi:10.1155/2014/867289)
Supplement: Supplementary file 1 — Table S1. H-score of all pathways for tumor and normal samples: This table lists the name, category, website and H-score values for all 1307 pathway. Table S2. Illustrative pathways belonging to term "No responding": This table lists the name, category, website and TVPC patterns for "No responding" pathways. Table S3. Illustrative pathways belonging to term "Consistent responding": This table lists the name, category, website and TVPC patterns for "Consistent responding" pathways. Table S4. Illustrative pathways belonging to term "Tumor specific responding": This table lists the name, category, website and TVPC patterns for "Tumor specific responding" pathways. Table S5. Illustrative pathways belonging to term "Normal specific responding": This table lists the name, category, web site and TVPC patterns for "Normal specific responding" pathways. Table S6. Illustrative pathways belonging to term "Divergent responding": This table lists the name, category, website and TVPC patterns for "Divergent responding" pathways. Table S7. Genes within profile #0 for normal samples: This table contains all genes within profile #0 for normal samples, and lists the normalized expression data to the right of gene symbol. Table S8. Genes within profile #2 for normal samples: This table contains all genes within profile #2 for normal samples, and lists the normalized expression data to the right of gene symbol. Table S9. Genes within profile #9 for normal samples: This table contains all genes within profile #9 for normal samples, and lists the normalized expression data to the right of gene symbol. Table S10. Genes within profile #12 for normal samples: This table contains all genes within profile # 12 for normal samples, and lists the normalized expression data to the right of gene symbol. Table S11. Genes within profile #14 for normal samples: This table contains all genes within profile #14 for normal samples, and lists the normalized expression data to the right of gene symbol. Ta [file 867289.f1.zip › 867289.f1/Table S13.xls]

## Sheet: Sheet1
Gene Table for Profile 2 (0.0,-1.0,-2.0,-3.0) Tumor
Num. Genes Expected	Num. Genes Assigned	P-Value	Significant
1512	350.7	0	(significant)
-------
Selected	Weight	Gene Symbol	SPOT	0h	4h	12h	24h
	1	BTBD6	ID_29	0	-0.79	-1.12	-1.74
	1	TFPI	ID_39	0	-0.2	-2.64	-5.4
	1	FAIM	ID_53	0	-1.09	-3.33	-4.42
	1	PARP9	ID_71	0	-0.45	-1.54	-1.56
	1	PARP3	ID_75	0	-0.78	-1	-1.21
	1	SNORA24	ID_84	0	-1.32	-1.97	-2.07
	1	ANP32B	ID_101	0	-0.54	-2.34	-3.07
	1	PARVA	ID_117	0	-0.65	-0.74	-1.89
	1	UGDH	ID_128	0	0.05	-0.71	-1.66
	1	DOM3Z	ID_135	0	-0.26	-1.09	-1.91
	1	MLSTD1	ID_150	0	-0.61	-0.85	-1.41
	1	SPATA20	ID_153	0	-0.61	-1.1	-1.69
	1	NET1	ID_173	0	0.25	-0.96	-1.58
	1	MANEA	ID_216	0	-0.89	-2.06	-3.2
	1	ATF5	ID_231	0	-0.93	-1.08	-2.02
	1	NEXN	ID_270	0	-1.86	-6.17	-6.28
	1	GBL	ID_282	0	-0.56	-0.78	-1.01
	1	ATIC	ID_287	0	-0.51	-0.9	-1.57
	1	CUL4A	ID_300	0	-0.66	-1.08	-1.1
	1	CUTL1	ID_301	0	-0.36	-1.57	-1.62
	1	FST	ID_319	0	-1.18	-2.79	-2.84
	1	NEK6	ID_340	0	-0.99	-3.74	-3.51
	1	MAML2	ID_373	0	0.05	-2.02	-2.93
	1	AFG3L1	ID_378	0	-1.57	-2.09	-2.29
	1	ZFHX4	ID_384	0	-1.32	-2.54	-2.44
	1	STEAP3	ID_390	0	-0.07	-1.46	-2.6
	1	FXN	ID_399	0	-0.87	-0.99	-1.91
	1	STEAP1	ID_410	0	-0.36	-1.56	-2.58
	1	APOBEC3G	ID_442	0	-0.93	-0.7	-1.2
	1	RAI14	ID_454	0	-0.44	-2.1	-2.78
	1	PPIF	ID_487	0	-0.74	-1.61	-2.25
	1	SPTBN1	ID_503	0	0.07	-0.64	-1.02
	1	ANTXR2	ID_504	0	-0.59	-3.33	-4.28
	1	SCMH1	ID_508	0	-0.97	-1.15	-2.36
	1	PLEKHA2	ID_510	0	-1.16	-2.83	-3.13
	1	MDN1	ID_526	0	-0.27	-0.77	-1.06
	1	CAMK1G	ID_528	0	0.3	-2.86	-3.5
	1	PPAP2C	ID_530	0	-0.57	-1.93	-2.94
	1	CAMK2D	ID_546	0	-0.22	-0.34	-1.23
	1	PPAP2B	ID_554	0	-1.43	-3.1	-4.65
	1	PPWD1	ID_555	0	-1.2	-1.41	-1.64
	1	CUEDC1	ID_573	0	-0.38	-1	-1.55
	1	BMPR1A	ID_575	0	-0.49	-1.21	-1.5
	1	AUP1	ID_594	0	-0.53	-0.94	-1.21
	1	PTPRM	ID_600	0	-0.18	-1.21	-1.16
	1	PTPRF	ID_602	0	-0.3	-1.56	-2.42
	1	PTPRG	ID_603	0	-0.23	-1.78	-1.95
	1	HFE	ID_616	0	0.18	-0.56	-0.88
	1	PPT1	ID_618	0	-0.37	-0.8	-1.09
	1	PVRL3	ID_623	0	-0.09	-1.33	-1.76
	1	IGF2BP3 /// LOC65110	ID_624	0	-0.96	-3.41	-3.74
	1	FLJ39349	ID_633	0	-1.59	-2.27	-2.44
	1	UFC1	ID_653	0	-0.52	-0.78	-2.21
	1	ARHGEF2	ID_671	0	-0.53	-1.28	-1.59
	1	CYBRD1	ID_683	0	-0.57	-2.2	-2.75
	1	GANAB	ID_689	0	-0.16	-0.84	-1.04
	1	BDNFOS	ID_741	0	-0.65	-1.72	-2.1
	1	LYSMD2	ID_755	0	-0.73	-0.98	-1.25
	1	IPO8	ID_794	0	-0.54	-1.05	-1.39
	1	IPO4	ID_798	0	-0.28	-0.71	-1.19
	1	TBL1X	ID_835	0	-0.35	-0.75	-1.33
	1	ADCY3	ID_837	0	-0.16	-0.96	-1.71
	1	ADCY7	ID_842	0	-1.08	-4.23	-4.41
	1	LOC440498	ID_859	0	-0.85	-1.67	-1.86
	1	DEPDC1	ID_867	0	-1.26	-1.31	-1.67
	1	SCC-112	ID_877	0	-0.48	-1.09	-1.37
	1	DOCK10	ID_934	0	-1.29	-4.23	-5.27
	1	NR2F2	ID_935	0	-2.34	-2.26	-2.87
	1	NR2F1	ID_937	0	-1.87	-2.76	-3.01
	1	AVEN	ID_946	0	-0.68	-1.18	-2.02
	1	PLEK2	ID_951	0	-0.18	-0.79	-1.75
	1	SLC4A2	ID_995	0	-0.55	-0.98	-2.08
	1	SLC4A4	ID_998	0	-1.08	-4.29	-4.57
	1	PTPLB	ID_1023	0	-0.08	-0.79	-1.75
	1	PTPLA	ID_1025	0	-0.49	-0.98	-1.87
	1	PTPN9	ID_1045	0	-2.02	-2.6	-2.87
	1	ECHDC1	ID_1059	0	-0.47	-0.68	-1.1
	1	ECHDC2	ID_1060	0	-1.24	-2.33	-3.25
	1	IFNGR2	ID_1074	0	-0.57	-1.71	-1.78
	1	BUB1B	ID_1092	0	-0.38	-0.81	-1.11
	1	PTPRB	ID_1115	0	-1.31	-2.55	-2.44
	1	TDP1	ID_1130	0	-1.14	-1.09	-1.82
	1	NFIC	ID_1134	0	-1.35	-2.49	-3.63
	1	HNRPD	ID_1141	0	-0.37	-0.92	-1.37
	1	KIAA1913	ID_1191	0	-1.01	-3.23	-3.84
	1	PCDHGC3 /// PCDHGB4	ID_1221	0	-0.05	-0.92	-1.21
	1	KDELR1	ID_1235	0	-0.38	-0.69	-1.04
	1	HDGFRP3	ID_1278	0	-0.61	-2.37	-3.62
	1	IL6	ID_1296	0	-5.18	-4.04	-6.26
	1	NTNG1	ID_1303	0	-0.36	-1.45	-1.53
	1	RBM15B	ID_1314	0	-1.25	-1.07	-1.81
	1	DTYMK /// LOC643109	ID_1325	0	-0.62	-1.41	-1.49
	1	PABPN1	ID_1329	0	-0.52	-1.07	-1.1
	1	KNTC2	ID_1335	0	-0.86	-1.04	-1.44
	1	ABCA1	ID_1349	0	0.86	-2.63	-4.04
	1	KDELC2	ID_1359	0	-0.78	-2.5	-4.15
	1	DNMBP	ID_1392	0	-1.16	-1.84	-1.87
	1	LOC57228	ID_1424	0	-1.4	-3.4	-3.55
	1	TXNRD2	ID_1429	0	-0.73	-1.14	-2.12
	1	ZBED1	ID_1449	0	-0.94	-1.51	-1.87
	1	NSMAF	ID_1470	0	-0.83	-2.63	-4.76
	1	GCN5L2	ID_1485	0	-1.58	-1.48	-1.98
	1	CDCP1	ID_1540	0	-0.63	-3.44	-4
	1	PRG1	ID_1554	0	-0.2	-0.59	-1.24
	1	MBD3	ID_1559	0	-0.95	-1.53	-1.6
	1	STYK1	ID_1565	0	-0.77	-2.02	-1.77
	1	APBA2	ID_1588	0	-0.9	-1.19	-1.75
	1	BIRC4	ID_1598	0	-0.98	-1.09	-1.36
	1	HYI	ID_1602	0	-0.38	-0.92	-1.9
	1	PLXNA1	ID_1618	0	-0.1	-0.86	-1.22
	1	SLC22A15	ID_1622	0	-1.52	-1.55	-2.07
	1	PLXNB2	ID_1639	0	0.04	-1.11	-1.7
	1	MRGPRF	ID_1644	0	-1.03	-3.9	-3.61
	1	PRR3	ID_1664	0	-0.88	-0.63	-1
	1	FLJ14668	ID_1680	0	-1.06	-1.93	-2.26
	1	IGFBP6	ID_1697	0	-0.26	-0.98	-1.52
	1	HOP	ID_1701	0	-0.57	-2.01	-3.37
	1	LOC399959	ID_1710	0	-3.26	-6.04	-6.25
	1	HNT	ID_1717	0	-0.86	-2.31	-5.75
	1	COMMD7	ID_1733	0	-0.37	-1.18	-2.28
	1	PRNP	ID_1734	0	-0.45	-1.83	-2.3
	1	FLJ10213	ID_1746	0	-0.8	-0.98	-1.32
	1	IRF2	ID_1778	0	0.19	-1.18	-1.4
	1	SLC5A6	ID_1781	0	-0.45	-1.79	-2.17
	1	PEAR1	ID_1797	0	-0.85	-2.98	-3.39
	1	CDCA8	ID_1808	0	-0.72	-0.81	-1.25
	1	MAGED2	ID_1824	0	-0.49	-0.87	-1.31
	1	TCF4	ID_1863	0	0.29	-0.95	-1.35
	1	TCF8	ID_1871	0	-0.42	-1.2	-1.59
	1	FLJ25476	ID_1907	0	-1.51	-2.93	-3.91
	1	MGC26963	ID_1912	0	0.02	-1.22	-1.43
	1	NID1	ID_1930	0	-0.12	-0.84	-1.96
	1	IRS1	ID_1977	0	-1.77	-2.29	-2.88
	1	PSCA	ID_1982	0	-0.65	-2.16	-2.01
	1	HDDC2	ID_1993	0	-0.42	-0.65	-1.68
	1	CPSF2	ID_2046	0	-0.86	-0.94	-1.22
	1	ALDH16A1	ID_2107	0	-0.15	-0.62	-1.01
	1	SMYD2	ID_2146	0	-0.34	-0.75	-1.1
	1	MCAM	ID_2148	0	-0.12	-0.45	-1.03
	1	DZIP1L	ID_2159	0	-1.21	-0.87	-1.53
	1	TRMT1	ID_2174	0	-0.63	-1.5	-1.9
	1	ABCE1	ID_2186	0	-0.62	-1.44	-1.67
	1	PSG2	ID_2192	0	-0.04	-0.88	-1.11
	1	PSG3	ID_2193	0	-0.74	-2.06	-2.38
	1	PSG1	ID_2196	0	-0.56	-1.16	-1.09
	1	PSG9	ID_2197	0	-0.59	-1.17	-1.28
	1	PSG6	ID_2199	0	-0.09	-1.6	-1.63
	1	ABCC9	ID_2245	0	-0.72	-1.1	-1.2
	1	ABCC4	ID_2249	0	-0.45	-1.91	-2.23
	1	ABCC1	ID_2251	0	0.04	-0.86	-1.12
	1	C20ORF59	ID_2264	0	-0.48	-1.15	-2.61
	1	RBM10	ID_2282	0	-0.49	-1.23	-1.62
	1	RBM13	ID_2285	0	-0.25	-0.85	-1.33
	1	PSMA1	ID_2293	0	-0.48	-0.76	-1.31
	1	PSMB5	ID_2313	0	-0.29	-0.6	-1.23
	1	TBL2	ID_2335	0	-0.3	-0.6	-1.43
	1	PSMB8	ID_2343	0	-0.33	-1.16	-3.73
	1	KIAA1856	ID_2356	0	-0.69	-2.58	-2.87
	1	MCM7	ID_2375	0	-0.42	-1.11	-1.17
	1	MCM5	ID_2413	0	-0.68	-1.52	-2.04
	1	C20ORF20	ID_2414	0	-0.93	-0.8	-1.86
	1	MIRN21	ID_2442	0	0.21	-0.72	-1.21
	1	DUS3L	ID_2447	0	-0.93	-1.93	-2.51
	1	C20ORF44	ID_2454	0	-0.88	-1.12	-1.33
	1	C20ORF42	ID_2457	0	-0.86	-1.82	-1.94
	1	FLJ90013	ID_2461	0	-0.38	-1.01	-1.39
	1	MGST1	ID_2478	0	-0.42	-1.33	-2.83
	1	MGST2	ID_2481	0	-0.26	-0.9	-1.37
	1	VPS52	ID_2485	0	-0.8	-0.74	-1.52
	1	FOXF1	ID_2497	0	-3.04	-4.39	-4.91
	1	FOXF2	ID_2498	0	-1.93	-4.02	-4.15
	1	VNN1	ID_2501	0	-2.74	-5.25	-5.11
	1	ARNTL2	ID_2528	0	-0.45	-0.77	-1.36
	1	GAS6	ID_2542	0	-0.69	-1.82	-3.28
	1	USP13	ID_2575	0	-0.75	-2.99	-3.29
	1	KIAA0692	ID_2602	0	-1.07	-1.38	-1.73
	1	USP24	ID_2606	0	-1.01	-2.15	-2.8
	1	USP36	ID_2618	0	-0.7	-1.72	-1.66
	1	FOXD1	ID_2622	0	-1.89	-3.32	-4.82
	1	TACC2	ID_2673	0	-1.06	-2.21	-2.04
	1	FBXW4	ID_2701	0	-0.96	-1.37	-2.4
	1	AUTS2	ID_2703	0	-1.63	-3.26	-3.08
	1	SPPL2A	ID_2710	0	-0.4	-1	-1.22
	1	CAD	ID_2716	0	-0.93	-1.39	-1.96
	1	PKN3	ID_2719	0	0	-0.58	-1.05
	1	PKN2	ID_2733	0	-0.38	-0.9	-1.08
	1	CD109	ID_2764	0	0.12	-1.18	-1.9
	1	CEBPD	ID_2792	0	-0.69	-1.05	-1.39
	1	PHLPPL	ID_2795	0	-0.56	-0.94	-1.35
	1	APIP	ID_2804	0	-0.37	-0.52	-1.34
	1	BBX	ID_2816	0	-0.11	-1.04	-1.17
	1	DDX17	ID_2824	0	-0.88	-2.05	-2.06
	1	GBE1	ID_2917	0	-0.48	-1.07	-1.79
	1	PLAU	ID_2921	0	-2.25	-8.49	-8.8
	1	GBAS	ID_2944	0	-0.68	-0.62	-1.7
	1	SEMA3A	ID_2953	0	-0.12	-2.52	-4.7
	1	NIP7	ID_2965	0	-0.79	-1.52	-1.65
	1	SEMA4C	ID_2983	0	-0.87	-1.96	-2.14
	1	SEMA4B	ID_2985	0	0.27	-1.3	-1.73
	1	BID	ID_2994	0	-0.42	-1.38	-2.49
	1	BIC	ID_2995	0	-0.89	-4.3	-5.7
	1	DCHS1	ID_2999	0	-0.14	-2.04	-2.77
	1	UBTF	ID_3020	0	-0.59	-1.55	-1.75
	1	RBMS3	ID_3039	0	-0.29	-3.29	-3.24
	1	IFRD2	ID_3045	0	-0.79	-1.39	-1.89
	1	RBMS1	ID_3047	0	-0.99	-1.53	-1.68
	1	DTX3L	ID_3050	0	-1.91	-2.83	-3.02
	1	TOR1AIP1	ID_3051	0	-0.46	-1.19	-1.62
	1	LOC651619	ID_3055	0	-0.69	-3.42	-5.33
	1	GBP3	ID_3062	0	-1.02	-3.15	-4.38
	1	GBP1	ID_3064	0	-0.31	-2.05	-5.21
	1	DAZAP1	ID_3070	0	-0.47	-1.22	-1.58
	1	CFLAR	ID_3079	0	-1.66	-2.68	-3.09
	1	SACS	ID_3086	0	0.14	-0.73	-1.3
	1	FOXP1	ID_3092	0	-0.66	-1.34	-1.68
	1	C2ORF4	ID_3101	0	-0.56	-1.12	-1.19
	1	BOK	ID_3107	0	-0.23	-0.53	-1.42
	1	C2ORF3	ID_3121	0	-0.39	-0.87	-1.27
	1	FOXM1	ID_3123	0	-0.9	-1.6	-2.24
	1	TAP2	ID_3131	0	0.07	-0.97	-1.67
	1	BMPER	ID_3150	0	-1.07	-3.47	-3.39
	1	THRAP4	ID_3157	0	-0.99	-1.62	-2.52
	1	WSB2	ID_3159	0	-0.62	-1.19	-1.62
	1	THRAP5	ID_3162	0	-0.67	-0.78	-1.2
	1	STOML2	ID_3169	0	-0.33	-0.33	-1.21
	1	CCNA2	ID_3179	0	-0.4	-0.89	-1.13
	1	PLAUR	ID_3189	0	-0.86	-2.97	-3.94
	1	CLCC1	ID_3209	0	-0.31	-0.8	-1.01
	1	TGFBR2	ID_3213	0	-0.75	-1.49	-2.32
	1	TRPS1	ID_3222	0	-0.68	-0.87	-1.31
	1	CCND1	ID_3249	0	-1.46	-4.71	-6.28
	1	ASTE1	ID_3257	0	-0.74	-1.06	-1.16
	1	ILVBL	ID_3265	0	-0.18	-0.94	-1.51
	1	FLRT2	ID_3268	0	-0.27	-1.56	-2.56
	1	CCNB1	ID_3276	0	-0.71	-0.95	-1.76
	1	CCNB2	ID_3280	0	-0.58	-0.74	-1.34
	1	REPIN1	ID_3286	0	-0.76	-1.05	-1.15
	1	MGC24039	ID_3310	0	-0.18	-2.07	-2.53
	1	HIRIP3	ID_3313	0	-0.94	-1.31	-1.51
	1	C2ORF12 /// LOC64829	ID_3363	0	-0.5	-1.73	-1.73
	1	PLK1	ID_3368	0	-0.88	-1.56	-2.07
	1	HEXA	ID_3374	0	-0.3	-1.49	-1.77
	1	DEK	ID_3376	0	-0.53	-1.12	-1.07
	1	FRMD6	ID_3385	0	-0.91	-1.66	-2.05
	1	TRPM7	ID_3401	0	-0.42	-1.11	-1.77
	1	NUP85	ID_3404	0	-0.32	-1.19	-1.19
	1	PLP2	ID_3438	0	-0.33	-1.03	-2.31
	1	ALPK2	ID_3443	0	-0.09	-2.53	-4.03
	1	ITPA	ID_3453	0	-0.53	-1.45	-2.06
	1	CFH	ID_3488	0	-0.19	-0.91	-1.29
	1	TRPA1	ID_3498	0	-0.11	-3.9	-5.35
	1	NOL5A	ID_3500	0	-0.76	-0.92	-1.26
	1	IGF2BP1	ID_3518	0	-0.01	-2.06	-2.63
	1	IGF2BP2	ID_3521	0	-0.16	-0.82	-1.32
	1	IGF2BP3	ID_3524	0	-1	-3.14	-4.24
	1	TRPC1	ID_3541	0	-0.77	-1.27	-1.51
	1	PMF1	ID_3550	0	-0.18	-1.12	-2.75
	1	LCORL	ID_3594	0	-1.29	-1.54	-1.85
	1	CLEC2B	ID_3607	0	0.27	-2.22	-4.03
	1	HOXC6	ID_3644	0	-1.06	-1.89	-2.75
	1	NUPL2	ID_3663	0	-0.42	-0.84	-1.14
	1	NOLA1	ID_3708	0	-0.62	-0.97	-1.1
	1	GALC	ID_3714	0	-0.8	-2.26	-3.71
	1	MGC13379	ID_3725	0	-0.72	-1.08	-2.97
	1	CKAP4	ID_3727	0	-0.22	-1.33	-2.65
	1	HOXB3	ID_3736	0	-0.96	-3.6	-3.65
	1	CSK	ID_3781	0	-0.26	-0.68	-1.1
	1	KIAA0515	ID_3805	0	-0.2	-1.74	-2.05
	1	MINA	ID_3819	0	-1.11	-1.35	-1.89
	1	MTHFS	ID_3823	0	-0.24	-0.75	-1.03
	1	LOC554202	ID_3827	0	-1.18	-1.97	-3.1
	1	RUFY3	ID_3839	0	-0.99	-1.8	-1.77
	1	PLAC8	ID_3840	0	-0.21	-2.17	-3.68
	1	CTHRC1	ID_3852	0	-0.85	-4.03	-4.8
	1	MAPK6	ID_3874	0	-0.36	-0.66	-1.07
	1	SPATS2	ID_3893	0	-0.23	-0.86	-1.17
	1	GCS1	ID_3906	0	0.37	-1.12	-1.84
	1	TCEAL4	ID_3972	0	-0.28	-0.55	-1.03
	1	IL17RA	ID_3973	0	-0.57	-1.03	-1.31
	1	P2RY5	ID_4002	0	-1.2	-1.26	-1.55
	1	P2RX5	ID_4016	0	-0.17	-0.74	-1.27
	1	CLDN1	ID_4066	0	0.17	-0.95	-1.71
	1	FKBP4	ID_4081	0	-0.16	-0.32	-1
	1	BTN2A1	ID_4085	0	-0.66	-1.57	-2.06
	1	EBP	ID_4105	0	-0.33	-0.31	-1.03
	1	SC65	ID_4108	0	-0.63	-1.4	-2.42
	1	PRKCDBP	ID_4143	0	-0.54	-1.44	-2.2
	1	NBPF11 /// NBPF9 ///	ID_4144	0	-0.41	-1.4	-1.85
	1	BTN3A3	ID_4159	0	-0.4	-2.38	-2.84
	1	ARSB	ID_4199	0	-1.39	-2.2	-2.3
	1	ARSI	ID_4208	0	-1.58	-1.29	-1.87
	1	ARSJ	ID_4209	0	-1.18	-5.02	-5.88
	1	LY96	ID_4221	0	-0.55	-1.97	-3.79
	1	LY6K	ID_4259	0	-0.32	-1.92	-3.68
	1	F2RL2	ID_4267	0	0.2	-2.14	-3.08
	1	ASAM	ID_4269	0	-0.94	-4.8	-5.26
	1	DST	ID_4305	0	-0.39	-2.28	-2.17
	1	DIAPH2	ID_4312	0	-0.4	-2.3	-3.16
	1	CORO2B	ID_4318	0	-0.68	-3.36	-3.96
	1	HEG1	ID_4320	0	-0.36	-2.31	-2.39
	1	HECW2	ID_4346	0	-1.16	-4.3	-4.7
	1	SCOTIN	ID_4350	0	-0.17	-0.93	-1.66
	1	EVI2A	ID_4351	0	-2.26	-6.55	-6.96
	1	EVI2B	ID_4353	0	-1.69	-3.69	-3.96
	1	EXOSC10	ID_4381	0	-1.13	-1.83	-1.85
	1	GEMIN4	ID_4388	0	-1.27	-1.02	-1.62
	1	WDR81	ID_4412	0	-0.38	-1.04	-0.93
	1	WDR74	ID_4414	0	-0.95	-2.01	-2.13
	1	FAP	ID_4424	0	-1.31	-3	-3.04
	1	FAT	ID_4430	0	-0.25	-1.26	-1.28
	1	DPAGT1	ID_4441	0	-0.25	-1.09	-1.25
	1	NME3	ID_4453	0	-0.42	-0.48	-1.39
	1	WDR57	ID_4463	0	-0.16	-0.33	-1.16
	1	SHOX2	ID_4484	0	-0.68	-1.42	-1.51
	1	WDR43	ID_4546	0	-0.64	-1.12	-1.26
	1	WDR13	ID_4567	0	0.11	-1.24	-1.34
	1	WDR12	ID_4569	0	-0.13	-0.75	-1.25
	1	DDX21	ID_4619	0	-0.69	-1.09	-1.51
	1	ASPH	ID_4621	0	-0.29	-1.05	-2.21
	1	RBPMS	ID_4638	0	-0.77	-2.37	-4.13
	1	COL1A2	ID_4640	0	-0.19	-1.58	-2.61
	1	DDX31	ID_4641	0	-0.07	-0.63	-1.07
	1	DDX42	ID_4667	0	-0.59	-0.98	-1.17
	1	DDX54	ID_4696	0	-0.23	-0.62	-1.12
	1	TMEM76 /// LOC643642	ID_4714	0	-0.96	-2.21	-2.97
	1	LOXL4	ID_4720	0	-0.6	-0.75	-1.06
	1	LOXL3	ID_4721	0	-0.49	-1.74	-1.81
	1	LOXL2	ID_4722	0	-0.13	-1.05	-1.75
	1	SEC24D	ID_4724	0	-0.85	-0.78	-1.04
	1	LOXL1	ID_4725	0	-0.06	-2.02	-4.54
	1	FBN2	ID_4760	0	-0.18	-0.7	-1.4
	1	DDX21 /// ZNF596	ID_4773	0	-0.59	-1.14	-1.44
	1	U2AF2	ID_4783	0	-0.56	-1.04	-1.69
	1	ZNRD1	ID_4826	0	-1.39	-1.42	-2.15
	1	POLM	ID_4831	0	-0.02	-0.92	-1.3
	1	POLS	ID_4836	0	-0.63	-1.02	-1.15
	1	ATP13A3	ID_4844	0	-0.25	-1.01	-1.22
	1	ATP13A1	ID_4850	0	-0.25	-0.71	-1.13
	1	PON2	ID_4854	0	-0.54	-1.86	-2.69
	1	ENG	ID_4856	0	-0.75	-2.31	-4.34
	1	UTP18	ID_4860	0	-0.36	-0.93	-1.33
	1	PLCL2	ID_4883	0	-0.59	-1.12	-1.32
	1	FASN	ID_4891	0	-0.13	-0.89	-1.58
	1	HNRPA2B1	ID_4908	0	-0.24	-0.61	-1.31
	1	KIAA0754	ID_4927	0	0.22	-0.97	-1.51
	1	SPOCD1	ID_4931	0	-0.73	-2.07	-3.14
	1	HDGF	ID_4947	0	-0.6	-1.5	-2.99
	1	LOC201164	ID_4949	0	0.12	-1.26	-1.39
	1	EVC	ID_4960	0	-0.73	-2.08	-2.79
	1	HEATR1	ID_4967	0	-0.43	-0.85	-1.01
	1	ACVR1B	ID_4994	0	-0.02	-0.58	-1.02
	1	MGLL	ID_5001	0	-0.55	-1.06	-2.33
	1	UCK2	ID_5034	0	-0.45	-1.59	-2.22
	1	ERF	ID_5037	0	-0.23	-1.28	-1.31
	1	UBE2J1	ID_5071	0	-0.61	-1.38	-1.5
	1	EIF2AK2	ID_5081	0	-0.32	-0.87	-1.4
	1	MYOHD1	ID_5087	0	-0.92	-2	-1.99
	1	XAB1	ID_5088	0	-0.41	-0.6	-1.11
	1	TAOK1	ID_5098	0	-0.57	-0.63	-1.01
	1	PRTFDC1	ID_5132	0	-0.66	-0.82	-2.52
	1	MTMR2	ID_5154	0	-0.46	-1	-1.26
	1	MTMR1	ID_5156	0	-1.06	-1.89	-1.97
	1	KIAA1345	ID_5157	0	-0.27	-1.98	-2.82
	1	ACOT2 /// ACOT1 ///	ID_5170	0	-1.13	-1.41	-2.24
	1	MDFIC	ID_5202	0	-1.1	-3.44	-3.83
	1	EIF3S7	ID_5209	0	-0.32	-0.75	-1.23
	1	EDG1	ID_5210	0	-0.49	-2.27	-2.79
	1	EDG2	ID_5215	0	-1.68	-4.25	-5.55
	1	ADAMTSL1	ID_5244	0	-0.46	-1.23	-1.62
	1	MAMDC2	ID_5245	0	-0.48	-1.48	-2.03
	1	KIAA1303	ID_5259	0	-0.89	-1.15	-1.28
	1	G6PC3	ID_5261	0	-0.31	-0.54	-1.06
	1	RSF1	ID_5310	0	-0.62	-1.2	-1.71
	1	SNX14	ID_5362	0	-0.05	-1.2	-1.64
	1	FIGN	ID_5372	0	-1.1	-1.07	-1.75
	1	UBE2Q2	ID_5391	0	-0.59	-2.14	-3.12
	1	STAT5B	ID_5407	0	-0.89	-0.86	-2.22
	1	RPUSD4	ID_5418	0	-0.69	-0.83	-1.01
	1	FAM65A	ID_5445	0	-0.24	-0.76	-1.1
	1	TMEM39A	ID_5457	0	-0.3	-1.25	-1.53
	1	TMEM39B	ID_5458	0	-0.81	-3.33	-3.49
	1	SRPX2	ID_5460	0	-0.02	-1.15	-2.1
	1	NNMT	ID_5462	0	-1.14	-4.36	-5.38
	1	PXDN	ID_5468	0	-0.08	-0.81	-1.76
	1	C8ORF13	ID_5517	0	-0.52	-1.84	-3.41
	1	LENG4	ID_5520	0	-0.06	-1.13	-1.85
	1	STT3A	ID_5547	0	-0.14	-0.93	-1.23
	1	PTGFR	ID_5560	0	-0.16	-1.34	-2.02
	1	TP53RK	ID_5561	0	-0.83	-0.75	-1.48
	1	MRPS35	ID_5573	0	-0.55	-1.2	-1.38
	1	MMP3	ID_5589	0	-0.48	-1.63	-3.03
	1	MMP2	ID_5591	0	0.1	-1.04	-1.72
	1	TAPBP	ID_5600	0	-0.52	-1.62	-2.47
	1	C8ORF57	ID_5628	0	-0.28	-2.46	-4.06
	1	UBE2D3	ID_5648	0	-0.5	-0.89	-1.13
	1	CARD8	ID_5659	0	-0.62	-1.32	-1.57
	1	CARD9	ID_5660	0	-0.72	-0.67	-1.51
	1	C8ORF38	ID_5682	0	-0.55	-0.83	-1.2
	1	UBE2E3	ID_5683	0	-1	-1.74	-1.76
	1	NEDD4	ID_5686	0	-0.81	-2.47	-3.26
	1	CIRBP	ID_5690	0	-0.41	-0.76	-1.03
	1	UBE2E1	ID_5696	0	-0.41	-1.35	-2.75
	1	ARHGAP18	ID_5700	0	-0.21	-1.41	-2.02
	1	ARHGAP21	ID_5707	0	-0.67	-2.4	-2.83
	1	ARHGAP22	ID_5708	0	-1.51	-2.87	-2.85
	1	TP53I3	ID_5709	0	-0.68	-1.58	-1.6
	1	ARHGAP29	ID_5728	0	-0.67	-1.16	-1.64
	1	ARHGAP24	ID_5729	0	-2.1	-4.29	-4.76
	1	JOSD3	ID_5737	0	-1.26	-1.93	-2.23
	1	TMBIM4	ID_5764	0	-0.43	-1.63	-2.64
	1	TMBIM1	ID_5765	0	-0.19	-1.14	-1.89
	1	TRPC4AP	ID_5772	0	-0.23	-0.35	-1.03
	1	LTBP1	ID_5778	0	-0.25	-1.78	-3.46
	1	PTGS2	ID_5779	0	-0.7	-1.22	-2.51
	1	LTBP2	ID_5780	0	-0.31	-2.14	-2.92
	1	CTNNB1	ID_5794	0	-0.26	-0.52	-1.1
	1	MTERFD2	ID_5804	0	-1.32	-1	-1.66
	1	SH3RF1	ID_5873	0	-0.73	-1.87	-2.03
	1	SMPDL3A	ID_5890	0	-0.69	-2.4	-3.6
	1	SLMAP	ID_5893	0	-0.11	-0.83	-1.43
	1	ARPC1B /// LOC653888	ID_5895	0	-0.4	-0.53	-1.39
	1	LOC221143	ID_5903	0	-0.81	-1.07	-1.34
	1	GNAQ	ID_5911	0	-0.25	-1.46	-1.51
	1	RRM1	ID_5914	0	-0.46	-1.28	-1.38
	1	GNB4	ID_5917	0	-0.58	-0.9	-1.56
	1	FHL2	ID_5935	0	-0.99	-1.26	-2.56
	1	GPR68	ID_5938	0	-0.89	-0.93	-1.24
	1	APBB1IP	ID_5940	0	-0.97	-2.69	-3.07
	1	NSMASE3 /// FLJ41352	ID_5944	0	-0.69	-1.3	-1.29
	1	MMACHC	ID_5945	0	-1.88	-1.45	-2.27
	1	MAWBP	ID_5963	0	-1.46	-2.64	-2.72
	1	MXRA8	ID_5965	0	0.2	-1.17	-2.01
	1	CAPN2	ID_5967	0	-0.44	-1.03	-1.67
	1	PB1	ID_6041	0	-0.64	-1.17	-1.28
	1	QSCN6L1	ID_6044	0	-0.2	-0.72	-1.51
	1	CDC42SE1	ID_6045	0	-0.57	-1.19	-1.36
	1	LOC150763	ID_6056	0	-0.44	-1.42	-2.09
	1	METTL1	ID_6060	0	-0.95	-1.23	-1.63
	1	GPR39	ID_6086	0	-1.33	-3.79	-3.47
	1	OXTR	ID_6154	0	-1.33	-4.33	-4.76
	1	IVNS1ABP	ID_6158	0	-0.81	-1.23	-2.08
	1	PVR	ID_6180	0	-0.23	-0.88	-1.73
	1	S100A3	ID_6182	0	-0.96	-0.94	-1.29
	1	KIAA0133	ID_6191	0	-0.87	-1.54	-1.65
	1	C6ORF153	ID_6218	0	-0.63	-0.93	-1.05
	1	ECOP	ID_6232	0	-0.29	-1.09	-2.25
	1	C6ORF148	ID_6233	0	-0.77	-1.64	-1.76
	1	PXN	ID_6246	0	-0.73	-1.47	-1.65
	1	C6ORF115	ID_6260	0	-0.24	-0.78	-2.19
	1	ECM1	ID_6272	0	-0.17	-1.06	-1.29
	1	SUSD1	ID_6296	0	-1.37	-1.75	-1.98
	1	FAM57A	ID_6301	0	-1.71	-4.25	-4.38
	1	INPPL1	ID_6311	0	-0.47	-1.66	-1.91
	1	C6ORF105	ID_6316	0	-1.51	-4.48	-4.76
	1	ASH1L	ID_6319	0	-0.65	-0.83	-1.17
	1	SUSD5	ID_6323	0	-0.73	-1.65	-3.79
	1	TOMM22	ID_6326	0	-0.3	-0.42	-1.24
	1	C6ORF107	ID_6331	0	-0.63	-0.75	-1.93
	1	C6ORF108	ID_6332	0	-0.17	-0.35	-1.13
	1	BCAT1	ID_6337	0	-0.25	-0.97	-2.54
	1	KIAA0195	ID_6338	0	-0.76	-1.41	-1.46
	1	LOC646739	ID_6347	0	-0.48	-2.25	-2.3
	1	MAPK12	ID_6374	0	-0.52	-1.2	-2.2
	1	PNN	ID_6398	0	-0.65	-1.56	-1.52
	1	GLT8D1	ID_6399	0	-0.44	-1.07	-0.95
	1	FLJ41747	ID_6414	0	-1.12	-2.76	-2.88
	1	LOC254057	ID_6415	0	-0.4	-0.49	-1.05
	1	SLC38A1	ID_6423	0	-0.59	-3.69	-4.98
	1	TSHZ3	ID_6427	0	-0.4	-0.71	-1.17
	1	SLC38A6	ID_6436	0	-0.28	-1.28	-2.15
	1	EWSR1	ID_6448	0	-0.29	-1.01	-1.46
	1	C6ORF189	ID_6487	0	-0.64	-1.32	-2.82
	1	EIF4G1	ID_6499	0	-0.26	-0.79	-1.51
	1	EIF4G2	ID_6501	0	-0.37	-0.54	-1.29
	1	EIF4G3	ID_6502	0	-0.49	-1.22	-1.42
	1	KIAA1199	ID_6506	0	-0.7	-1.06	-2.16
	1	C6ORF192	ID_6515	0	-0.09	-0.99	-1.46
	1	C6ORF155	ID_6522	0	-0.19	-0.54	-1.81
	1	C3ORF64	ID_6535	0	-1.19	-3.88	-4.89
	1	KRT7	ID_6542	0	-0.5	-1.14	-3.72
	1	GSTO1	ID_6553	0	-0.48	-0.62	-1.71
	1	CENPL	ID_6567	0	-1.5	-2.65	-2.88
	1	CENPF	ID_6572	0	-0.11	-0.81	-1.39
	1	ESPL1	ID_6633	0	-0.24	-1.37	-1.92
	1	SSTR1	ID_6646	0	-3.67	-6.14	-7.32
	1	HSPBAP1	ID_6655	0	-0.64	-1.24	-1.5
	1	ALCAM	ID_6676	0	-0.35	-0.93	-1.39
	1	C19ORF12	ID_6715	0	-0.56	-0.95	-1.38
	1	CASP1 /// COP1	ID_6716	0	-1.63	-2.22	-3.5
	1	FGF5	ID_6724	0	-2.45	-4.98	-5.99
	1	DAXX	ID_6735	0	-0.71	-1.07	-1.49
	1	FGF1	ID_6747	0	-0.72	-2.92	-3.06
	1	FGF2	ID_6749	0	-1.83	-4.51	-4.73
	1	QPCT	ID_6824	0	-0.66	-1.13	-2.06
	1	DBF4	ID_6842	0	-0.57	-0.86	-1.53
	1	FGD1	ID_6882	0	-0.75	-1.2	-1.44
	1	MEIS1	ID_6886	0	-0.08	-0.57	-1.59
	1	MEIS2	ID_6888	0	-2.1	-3.33	-4.71
	1	PALB2	ID_6896	0	-1.11	-1.07	-1.5
	1	FURIN	ID_6919	0	-0.83	-0.66	-1.26
	1	IBRDC1	ID_6941	0	-0.84	-0.79	-1.21
	1	HRH1	ID_6984	0	-0.32	-2.61	-3.15
	1	LOC644617	ID_7016	0	-1.01	-1.63	-2.04
	1	FLJ31951	ID_7032	0	-1.02	-2.34	-2.25
	1	HNRPA1 /// LOC644245	ID_7033	0	-0.73	-1.02	-1.42
	1	AURKA	ID_7043	0	-0.92	-1.59	-2.34
	1	SPCS2 /// LOC653566	ID_7047	0	-0.35	-1.18	-1.37
	1	RAN	ID_7069	0	-0.36	-1.14	-2.13
	1	PRDM4	ID_7082	0	-0.8	-0.84	-1.25
	1	DBN1	ID_7092	0	-0.38	-0.69	-1.34
	1	NCKAP1	ID_7118	0	-0.44	-1.21	-1.88
	1	C1ORF118	ID_7120	0	-0.98	-1.05	-1.62
	1	GOSR1	ID_7130	0	-1.16	-1.39	-1.64
	1	HSPH1	ID_7159	0	-0.17	-0.65	-1.83
	1	RBBP8	ID_7182	0	-1.06	-1.16	-1.38
	1	KIF21A	ID_7209	0	-1	-1.79	-1.79
	1	DTYMK /// LOC653208	ID_7217	0	-0.63	-1.47	-1.69
	1	NPR2	ID_7224	0	-0.81	-1.39	-1.67
	1	SNCAIP	ID_7239	0	-0.47	-0.57	-1.05
	1	HNRPUL1	ID_7256	0	0	-1.29	-1.41
	1	UBAP2L	ID_7294	0	-0.68	-1.57	-2.14
	1	RANBP5	ID_7316	0	-0.66	-0.87	-1.18
	1	RANBP1	ID_7323	0	-0.33	-0.51	-1.31
	1	MATR3	ID_7343	0	-0.58	-0.93	-1.22
	1	OXCT1	ID_7363	0	-0.6	-0.95	-2.25
	1	PALM2	ID_7366	0	-0.4	-1.7	-2.52
	1	SLC39A8	ID_7367	0	-0.32	-0.59	-1.22
	1	FAM80B	ID_7396	0	-0.76	-1.69	-2.29
	1	ZNF43	ID_7428	0	-0.76	-0.81	-1.17
	1	ZNF644	ID_7436	0	-1.81	-2.16	-2.55
	1	COLEC12	ID_7442	0	0.12	-0.76	-1.23
	1	LOC133308	ID_7450	0	-0.61	-0.5	-1.01
	1	ZNF614	ID_7462	0	-1.52	-1.3	-2.33
	1	ZNF76	ID_7471	0	-0.66	-0.63	-1.15
	1	ZNF618	ID_7476	0	-0.8	-1.61	-1.57
	1	GPD2	ID_7500	0	-0.33	-1.28	-1.88
	1	ZNF629	ID_7514	0	0.36	-1.86	-2.22
	1	ZNF690	ID_7572	0	-0.62	-0.91	-1.42
	1	CAND2	ID_7580	0	-0.3	-1.13	-1.05
	1	GPATC4	ID_7591	0	-0.51	-1.05	-1.67
	1	EEA1	ID_7598	0	-0.63	-0.82	-1.15
	1	ZNF26	ID_7632	0	-0.36	-1.05	-0.92
	1	BAT2	ID_7694	0	-0.69	-1.23	-1.89
	1	BAT1	ID_7695	0	-0.26	-0.57	-1.01
	1	ZNF697	ID_7703	0	-1.6	-1.97	-2.61
	1	HSPE1	ID_7706	0	-0.15	-0.55	-1.4
	1	HSPD1	ID_7719	0	-0.11	-0.3	-1.02
	1	FLJ38984	ID_7744	0	-1.72	-2.44	-2.71
	1	SFRS6	ID_7818	0	-1.04	-1.01	-1.33
	1	SFRS7	ID_7819	0	-0.67	-1.22	-1.87
	1	HOMER3	ID_7823	0	-0.42	-1.79	-3.56
	1	EDG2 /// LOC644923	ID_7826	0	-1.73	-3.77	-4.76
	1	SUCLG2	ID_7831	0	-0.66	-0.55	-1.31
	1	SFRS1	ID_7835	0	-0.59	-1.09	-1.21
	1	SFRS3	ID_7838	0	-0.12	-0.86	-1.34
	1	LAMC1	ID_7850	0	-0.43	-2.07	-2.52
	1	LGALS3BP	ID_7860	0	0.06	-0.97	-1.46
	1	LAMB3	ID_7861	0	-1.98	-3.15	-3.96
	1	LAMB1	ID_7870	0	-0.52	-1.48	-2.56
	1	TREX1	ID_7879	0	-0.54	-0.86	-1.09
	1	LAMA4	ID_7889	0	-0.87	-0.84	-1.08
	1	SFRP1	ID_7891	0	-0.34	-1.09	-2.31
	1	KIAA0368	ID_7900	0	-1.04	-2.46	-3.31
	1	MLH3	ID_7905	0	-1.19	-1.02	-1.87
	1	LOC646916	ID_7911	0	-0.3	-1.32	-1.65
	1	BAG2	ID_7913	0	-1.15	-2.31	-3.04
	1	FAM91A2 /// FLJ39739	ID_7921	0	-0.95	-3.01	-3.9
	1	GULP1	ID_7951	0	-0.42	-0.93	-1.04
	1	CLDN11	ID_7953	0	-0.33	-1.23	-1.69
	1	FAM78B	ID_7976	0	-0.8	-1.63	-2.19
	1	JMJD3	ID_7978	0	-0.53	-0.84	-1.2
	1	UBQLN2	ID_7988	0	-0.98	-1.77	-1.81
	1	MLL5	ID_7991	0	-0.92	-1.28	-1.38
	1	MLKL	ID_7997	0	-0.86	-3.2	-4.03
	1	NQO1	ID_7998	0	-0.36	-0.58	-2.03
	1	KIAA0323	ID_8001	0	-1.02	-1.04	-1.34
	1	MLL2	ID_8003	0	-0.73	-1.46	-1.41
	1	CEPT1	ID_8024	0	-0.53	-1.11	-1.15
	1	RYK	ID_8031	0	-0.07	-0.84	-1.57
	1	TMLHE	ID_8036	0	-0.6	-1.48	-2.45
	1	SNORA9	ID_8037	0	-0.9	-1.23	-1.65
	1	MLPH	ID_8050	0	-0.55	-2.1	-3.32
	1	RSN	ID_8069	0	-0.9	-2.45	-2.54
	1	NPAS2	ID_8094	0	-0.94	-2.57	-3.11
	1	ZNF708	ID_8100	0	-1.09	-1.6	-1.87
	1	ZNF700	ID_8109	0	-1.09	-1.03	-1.33
	1	DCTD	ID_8111	0	-1.04	-1.36	-2.02
	1	FLJ43663	ID_8123	0	-2.47	-3.27	-4.82
	1	JUB	ID_8128	0	-2.01	-2.64	-2.98
	1	SYNCRIP	ID_8132	0	-0.38	-0.92	-1.31
	1	DHX30	ID_8146	0	-0.98	-0.83	-1.13
	1	PTBP1	ID_8157	0	-0.32	-0.41	-1.33
	1	UNC84B	ID_8162	0	-0.29	-0.79	-1.09
	1	JRK	ID_8178	0	-0.95	-0.83	-1.14
	1	ATP11C	ID_8198	0	-0.45	-1.77	-1.64
	1	KIAA1754	ID_8212	0	0.35	-1.75	-2.96
	1	RNF182	ID_8226	0	-0.37	-0.78	-1.09
	1	IL4R	ID_8241	0	-1.51	-2.93	-3.14
	1	SLC22A4	ID_8243	0	-0.26	-1.55	-2.26
	1	MRPL3	ID_8256	0	-0.64	-0.79	-1.04
	1	MRPL9	ID_8266	0	-0.45	-0.87	-1.68
	1	KLHDC5	ID_8272	0	-1.33	-3.03	-2.95
	1	C10ORF119	ID_8294	0	-0.54	-0.76	-1.39
	1	C10ORF116	ID_8298	0	-0.51	-0.46	-1.24
	1	IL7R	ID_8303	0	-2.12	-6.72	-7.3
	1	SF3B3	ID_8306	0	-0.44	-1.25	-1.66
	1	PAPSS2	ID_8330	0	-0.37	-0.67	-1.65
	1	ABCA11	ID_8334	0	-1.48	-1.56	-2.77
	1	SF3A3	ID_8353	0	-0.04	-0.77	-1.07
	1	DUSP4	ID_8356	0	-0.87	-1.88	-1.92
	1	LRP8	ID_8369	0	-0.85	-1.95	-2.86
	1	LRP5	ID_8379	0	-1.08	-1.51	-2.66
	1	IL1B	ID_8396	0	-2.54	-4.5	-7.4
	1	RNF146	ID_8400	0	-0.91	-0.97	-1.25
	1	SAMD4A	ID_8402	0	-0.88	-3.05	-3.35
	1	RNF138	ID_8431	0	-0.73	-1.3	-1.54
	1	RNF135	ID_8432	0	-2.16	-1.68	-2.99
	1	SMARCA1	ID_8433	0	-0.38	-1.11	-1.58
	1	LRAP	ID_8437	0	-0.19	-2.13	-2.91
	1	BICC1	ID_8448	0	-0.05	-0.77	-1.33
	1	SMARCB1	ID_8460	0	-0.69	-1.73	-1.98
	1	NRF1	ID_8480	0	-0.87	-0.68	-1.24
	1	TM4SF1	ID_8529	0	0.43	-2	-3.79
	1	TMED1	ID_8552	0	-0.88	-1.71	-1.81
	1	EHD2	ID_8557	0	-0.1	-0.55	-1.26
	1	CD44	ID_8590	0	-0.12	-1.31	-3.52
	1	PTPLAD2	ID_8628	0	-0.11	-0.58	-1
	1	SLC11A2	ID_8634	0	-0.85	-1.61	-1.93
	1	SET /// LOC642869	ID_8645	0	-0.27	-0.48	-1.04
	1	IKIP	ID_8678	0	-0.41	-0.91	-1.68
	1	CD58	ID_8681	0	-0.64	-1.77	-1.95
	1	NRP1	ID_8692	0	-1.15	-6.29	-7.29
	1	GJA1	ID_8697	0	-0.19	-1.73	-2.68
	1	CTBP2	ID_8716	0	-0.65	-1.75	-2.3
	1	CXCL5	ID_8733	0	-0.76	-1.49	-3.82
	1	CXCL6	ID_8745	0	-0.84	-2.62	-2.51
	1	SAMD9L	ID_8747	0	-0.23	-1.71	-2
	1	POPDC3	ID_8760	0	-0.77	-1.59	-2.52
	1	HCLS1	ID_8768	0	0.19	-1.23	-1.95
	1	KIAA1729	ID_8799	0	-0.38	-0.64	-1.18
	1	RIOK2	ID_8829	0	-0.18	-1.24	-2.94
	1	DDR2	ID_8856	0	-0.38	-4.09	-5.8
	1	CD97	ID_8859	0	0.46	-1.53	-2.67
	1	MRPS7	ID_8872	0	-0.67	-0.82	-1.2
	1	NRIP1	ID_8879	0	-2.68	-4.15	-4.92
	1	PANK4	ID_8880	0	-1.17	-1.07	-1.67
	1	CD82	ID_8893	0	-0.15	-0.35	-1.29
	1	TYMS	ID_8903	0	-0.68	-1.83	-3.09
	1	BCAP29	ID_8906	0	-0.34	-1.02	-1.37
	1	LSM7	ID_8930	0	-0.25	-0.6	-1.19
	1	SPAG7	ID_8958	0	-0.47	-1.81	-1.65
	1	SPAG5	ID_8960	0	-0.38	-0.81	-1.27
	1	FLII	ID_8962	0	-0.45	-0.82	-1.49
	1	PUS1	ID_8968	0	-0.36	-1.22	-1.7
	1	PUS7	ID_8978	0	-0.69	-1.08	-1.31
	1	C15ORF38	ID_8998	0	-0.62	-0.64	-1.46
	1	FBXL19	ID_9023	0	-1.31	-1.63	-2.33
	1	DLEU2	ID_9030	0	-0.68	-1.72	-2.24
	1	FMNL3	ID_9052	0	-0.56	-1.18	-1.32
	1	EXOSC2	ID_9065	0	-0.66	-0.58	-1.09
	1	TRMT5 /// LOC653695	ID_9075	0	-0.51	-0.88	-1.59
	1	NSD1	ID_9083	0	-1.6	-2.01	-2.43
	1	ZNF462	ID_9126	0	-1.24	-2.93	-3.44
	1	EGFR	ID_9152	0	-0.87	-2.93	-3.35
	1	EP400	ID_9174	0	-0.31	-0.93	-1.13
	1	MRC2	ID_9204	0	-0.57	-0.97	-1.95
	1	DICER1	ID_9223	0	-0.63	-0.88	-1.31
	1	CDK5RAP2	ID_9233	0	-0.98	-1.44	-1.82
	1	YAP1	ID_9236	0	-0.87	-2.76	-4.01
	1	CDK6	ID_9253	0	-0.65	-2.42	-2.74
	1	CDK4	ID_9255	0	-0.22	-1.12	-1.8
	1	C15ORF17	ID_9267	0	-0.85	-1.51	-1.73
	1	APH1A	ID_9270	0	-0.2	-0.85	-1.13
	1	SLC12A8	ID_9348	0	-0.34	-0.99	-1.07
	1	CXORF26	ID_9395	0	-1.6	-3.54	-3.54
	1	FAM96A	ID_9409	0	-0.56	-0.91	-1.33
	1	TNFRSF11B	ID_9415	0	-1.54	-5.12	-5.69
	1	NT5E	ID_9422	0	-0.45	-1.86	-3.85
	1	NT5C	ID_9423	0	-0.68	-0.88	-1.61
	1	LTBR	ID_9424	0	-0.65	-2.48	-3.44
	1	STARD13	ID_9452	0	-1.13	-2.38	-2.4
	1	TRHDE	ID_9454	0	-0.31	-1.92	-3.82
	1	ILF3	ID_9459	0	-0.56	-0.94	-1.67
	1	ZC3HAV1	ID_9472	0	-0.46	-1.71	-1.71
	1	C3ORF9	ID_9482	0	-0.33	-0.75	-1.82
	1	DERA	ID_9488	0	-0.5	-0.85	-1.47
	1	LOX	ID_9490	0	-0.5	-1.89	-3.77
	1	FUT11	ID_9493	0	-0.69	-1.56	-2.68
	1	FUT10	ID_9495	0	-0.11	-1.23	-1.26
	1	TIAL1	ID_9504	0	-1.17	-1.19	-1.65
	1	DERL2	ID_9509	0	-0.4	-1.1	-1.52
	1	DERL1	ID_9512	0	-0.24	-0.8	-1.09
	1	KIAA1600	ID_9520	0	-1.9	-3.09	-3.18
	1	TXNDC10	ID_9542	0	-0.05	-0.82	-1.74
	1	TXNDC14	ID_9543	0	-0.54	-1.26	-1.35
	1	DPY19L2	ID_9552	0	-0.58	-1.98	-2
	1	CXORF34	ID_9556	0	-0.16	-0.86	-1.14
	1	SPARC	ID_9602	0	-0.06	-1.03	-2.43
	1	SH3YL1	ID_9622	0	-0.59	-1.01	-1.84
	1	TMEM131	ID_9644	0	-0.51	-1.23	-1.52
	1	TMEM138	ID_9652	0	-1.02	-1.15	-1.54
	1	BCL2L1	ID_9679	0	-0.89	-1.27	-1.64
	1	PDSS1	ID_9682	0	-0.28	-0.57	-1.44
	1	OBSL1	ID_9696	0	-0.92	-1.72	-1.9
	1	EMILIN1	ID_9708	0	-0.73	-2.5	-3.57
	1	MAB21L1	ID_9723	0	-3.54	-5.55	-5.74
	1	SLC20A1	ID_9729	0	-0.66	-1.74	-1.64
	1	LXN	ID_9730	0	-0.21	-0.61	-2.1
	1	TMEM109	ID_9737	0	-0.22	-0.89	-1.49
	1	ZNF148	ID_9739	0	-0.65	-0.87	-1.09
	1	TMEM101	ID_9745	0	-1.52	-2.57	-2.73
	1	ZNF142	ID_9760	0	-1.04	-1.14	-1.48
	1	C19ORF2	ID_9779	0	-0.48	-0.64	-1.4
	1	IMP4	ID_9836	0	-0.26	-0.58	-1.02
	1	ME3	ID_9844	0	0	-0.91	-1.23
	1	MET	ID_9864	0	-0.27	-1.54	-2.17
	1	NTN4	ID_9865	0	0.09	-1.48	-1.89
	1	AMMECR1	ID_9886	0	-0.27	-1.11	-2.09
	1	MAZ	ID_9894	0	-0.34	-0.89	-1.08
	1	CASP4	ID_9896	0	-0.73	-2.18	-5.16
	1	SLC35D1	ID_9899	0	-0.47	-2.25	-2.31
	1	CASP8	ID_9903	0	-1.18	-2.26	-4.38
	1	SLC35D2	ID_9904	0	-0.43	-1.36	-1.88
	1	CASP1	ID_9906	0	-0.59	-2	-4.2
	1	SLC43A3	ID_9911	0	-0.53	-2.89	-3.48
	1	FLJ14213	ID_9920	0	-0.71	-1.39	-2.01
	1	SLC35E2	ID_9922	0	-0.01	-1.1	-1.44
	1	SLC35B1	ID_9939	0	-0.1	-0.75	-1.14
	1	SLC35B2	ID_9942	0	-0.29	-1.04	-1.08
	1	SLC35B4	ID_9943	0	-0.1	-0.66	-1.06
	1	C7ORF42	ID_9953	0	-0.16	-0.84	-1.03
	1	TMEM19	ID_9955	0	-0.3	-0.98	-1.14
	1	ATP2B1	ID_9978	0	-0.01	-0.91	-1.42
	1	DYNC2H1	ID_9990	0	-0.7	-0.87	-1.11
	1	NOD27	ID_10005	0	-0.17	-0.78	-1.94
	1	ATP2C1	ID_10025	0	-0.44	-1.28	-1.42
	1	MME	ID_10047	0	-0.48	-1.31	-2.26
	1	LETM2	ID_10048	0	-1.94	-4.1	-4.28
	1	RHBDF1	ID_10062	0	0.2	-0.79	-1.06
	1	SEPN1	ID_10064	0	-0.49	-0.63	-1
	1	ALG12	ID_10075	0	-0.45	-1.31	-1.74
	1	GLI2	ID_10090	0	-0.38	-1.24	-1.64
	1	HMMR	ID_10146	0	-0.37	-0.56	-1.42
	1	LPXN	ID_10157	0	-0.85	-2.7	-3.14
	1	EIF4ENIF1	ID_10167	0	-0.41	-0.51	-1.04
	1	CAP2	ID_10169	0	-0.71	-2.27	-4.88
	1	NLGN1	ID_10172	0	-0.52	-0.72	-1.33
	1	RAB32	ID_10178	0	-0.4	-1.01	-0.95
	1	SVIL	ID_10185	0	-0.32	-0.61	-1.02
	1	RAB34	ID_10189	0	-0.38	-0.87	-1.94
	1	RAB38	ID_10191	0	-0.22	-0.94	-1.05
	1	TMEM9B	ID_10213	0	-0.23	-0.81	-1.19
	1	PAPPA	ID_10216	0	-1.12	-3.47	-3.33
	1	TMEM98	ID_10221	0	-0.61	-0.92	-1.22
	1	2014-09-07	ID_10252	0	-0.58	-0.72	-1.05
	1	2014-09-08	ID_10253	0	-0.79	-1.79	-2.55
	1	CAV2	ID_10262	0	-0.44	-1.21	-1.36
	1	CAV1	ID_10265	0	-0.56	-1.66	-3.34
	1	TMEM80	ID_10268	0	-1.3	-2.66	-2.78
	1	FXYD5	ID_10270	0	-0.27	-0.97	-1.7
	1	MICAL-L1	ID_10273	0	-0.99	-1.91	-2.38
	1	LOC144874	ID_10277	0	-0.61	-1.29	-2.13
	1	TMEM77	ID_10284	0	-0.59	-1.61	-1.96
	1	TMEM62	ID_10321	0	-0.78	-2.02	-2.01
	1	TMEM64	ID_10324	0	-0.32	-0.51	-1.05
	1	MSN	ID_10340	0	-0.29	-0.68	-2.25
	1	TMEM16F	ID_10342	0	-0.23	-1.98	-2.48
	1	FLJ42709	ID_10347	0	-1.06	-2.16	-3.45
	1	KRTCAP2	ID_10352	0	-0.38	-0.69	-1.26
	1	TMEM158	ID_10370	0	-1	-2.55	-4.57
	1	TMEM154	ID_10382	0	-0.63	-2.09	-5.17
	1	MR1	ID_10390	0	-0.06	-0.51	-1.38
	1	TMEM166	ID_10402	0	-1.98	-4.98	-4.8
	1	TMEM51	ID_10404	0	-0.27	-1.2	-1.18
	1	TMEM49	ID_10412	0	0.12	-0.89	-1.64
	1	TMEM43	ID_10423	0	-0.29	-1.65	-2.51
	1	FSTL1	ID_10446	0	0.03	-1.78	-3.14
	1	ADAM8	ID_10461	0	-0.24	-1.22	-2.25
	1	ADAM9	ID_10463	0	-0.32	-0.78	-1.43
	1	C20ORF116	ID_10467	0	-0.56	-0.74	-1.31
	1	C20ORF117	ID_10468	0	-1.02	-1.95	-2.44
	1	ZNF292	ID_10538	0	-0.69	-1.08	-1.51
	1	ANGPT1	ID_10558	0	-0.27	-2.92	-4.22
	1	MYC	ID_10563	0	-1.4	-1.11	-1.71
	1	ZNF282	ID_10574	0	-0.48	-1.14	-1.63
	1	KIAA1430	ID_10580	0	-0.72	-0.99	-1.54
	1	MFSD5	ID_10605	0	-0.49	-1.87	-2.3
	1	DGKG	ID_10618	0	-0.69	-1.78	-1.97
	1	CMTM4	ID_10665	0	-0.17	-0.44	-1.28
	1	TSPAN4	ID_10678	0	-0.51	-1.24	-1.81
	1	CBFB	ID_10692	0	-0.29	-0.8	-1.1
	1	NHS	ID_10723	0	-0.37	-1.79	-2.31
	1	C14ORF159	ID_10738	0	-0.88	-1.05	-1.44
	1	TRIP6	ID_10753	0	-0.6	-2.43	-3.94
	1	NBN	ID_10756	0	-1.2	-1.75	-2.13
	1	TRIM8	ID_10772	0	-1.28	-3.28	-4.49
	1	GALNT3	ID_10804	0	-0.69	-3.13	-4.41
	1	HYLS1	ID_10808	0	-2.14	-1.9	-2.97
	1	GALNT7	ID_10809	0	-0.34	-1.68	-3.11
	1	GALNT6	ID_10811	0	0.01	-0.9	-1.73
	1	TYW3	ID_10815	0	-1.08	-2	-2.11
	1	C1QTNF1	ID_10826	0	-0.27	-0.69	-1.29
	1	NF1	ID_10835	0	-0.37	-1.03	-1.34
	1	C13ORF34	ID_10845	0	-0.41	-0.43	-1.03
	1	NOG	ID_10852	0	-0.68	-3.65	-3.44
	1	EIF2C2	ID_10853	0	-0.27	-2.05	-2.59
	1	NNT	ID_10873	0	-0.49	-1.41	-2.51
	1	EIF2C4	ID_10882	0	-0.71	-2.17	-2.24
	1	MTP18	ID_10891	0	-0.77	-0.72	-1.1
	1	OBFC2A	ID_10892	0	-0.48	-0.69	-1.18
	1	DCP1A	ID_10920	0	-0.7	-1.04	-1.24
	1	FJX1	ID_10923	0	-2.69	-5.11	-5.28
	1	C14ORF135	ID_10933	0	-0.68	-2.2	-2.8
	1	KCNMA1	ID_10951	0	-0.54	-1.79	-3.86
	1	FLJ14082	ID_10952	0	-1.45	-2.41	-2.77
	1	CBR3	ID_10960	0	-0.68	-2.39	-2.44
	1	MDS032	ID_10961	0	-0.55	-1.13	-1.66
	1	C14ORF149	ID_10974	0	-1.2	-1.85	-2.25
	1	NMI	ID_10978	0	-0.73	-3.18	-3.58
	1	DIMT1L	ID_10981	0	-0.41	-0.79	-1.06
	1	C20ORF199	ID_11024	0	-1.06	-1.22	-1.52
	1	CYORF15B	ID_11044	0	0.02	-1.39	-1.51
	1	ATRX /// LOC642995	ID_11075	0	-0.51	-0.79	-1.33
	1	FLJ30277	ID_11091	0	-0.13	-0.81	-1.18
	1	MPP4	ID_11117	0	-0.72	-2.82	-4.72
	1	APEX1	ID_11157	0	-0.23	-0.89	-1.79
	1	SART2	ID_11176	0	0.02	-0.98	-1.84
	1	CCAR1	ID_11187	0	-0.93	-1.21	-1.59
	1	ADSL	ID_11202	0	-0.33	-0.53	-1.15
	1	FLJ20035	ID_11215	0	-0.48	-2.51	-3.06
	1	LASP1	ID_11224	0	-0.4	-0.55	-1.93
	1	TICAM2	ID_11239	0	-0.28	-1.47	-1.81
	1	ARMCX4	ID_11271	0	-0.95	-2.52	-2.68
	1	ARMCX1	ID_11277	0	-0.87	-1.39	-1.78
	1	D4ST1	ID_11301	0	-0.64	-1.84	-2.83
	1	ENC1	ID_11303	0	-1.16	-2.98	-3.15
	1	FAM38A	ID_11311	0	-0.38	-1.83	-3.21
	1	PAX3	ID_11360	0	-1.03	-1.26	-1.68
	1	ADFP	ID_11379	0	-0.25	-1.43	-2
	1	JMJD1B	ID_11381	0	-0.77	-1.41	-1.4
	1	JMJD1C	ID_11382	0	-1.14	-2.91	-3.46
	1	COBLL1	ID_11396	0	-0.35	-1.38	-1.4
	1	ADI1	ID_11403	0	-0.58	-0.74	-2.1
	1	CCBE1	ID_11412	0	-1.11	-4.5	-5.3
	1	ABCB10	ID_11413	0	-0.82	-2.09	-3.41
	1	ANAPC1	ID_11416	0	-0.48	-0.98	-1.09
	1	LHFPL2	ID_11428	0	-0.6	-1.53	-1.57
	1	BAZ1A	ID_11433	0	-0.11	-0.88	-1.49
	1	SFXN4	ID_11452	0	-0.78	-1.5	-1.72
	1	SFXN1	ID_11454	0	-0.3	-0.95	-1.04
	1	C10ORF88	ID_11458	0	-0.96	-0.74	-1.06
	1	FAM111A	ID_11474	0	-1.09	-1.98	-2.49
	1	RABEP2	ID_11488	0	-0.75	-1.2	-1.65
	1	FAM35A	ID_11522	0	-1.19	-1.26	-1.8
	1	ZFP36L1	ID_11542	0	-0.8	-1.55	-1.55
	1	ZFP36L2	ID_11543	0	-0.02	-1.24	-1.52
	1	XBP1	ID_11546	0	-2.25	-2.36	-2.94
	1	BAZ2B	ID_11552	0	-0.91	-2.57	-2.33
	1	SLC16A2	ID_11570	0	-0.28	-1.15	-2.68
	1	SLC16A4	ID_11575	0	-0.45	-0.62	-1.02
	1	SLC16A7	ID_11576	0	-0.64	-1.52	-1.63
	1	FAM119B	ID_11598	0	-1.21	-2.35	-2.4
	1	SLC25A24	ID_11609	0	-0.47	-1.46	-1.62
	1	SLC25A38	ID_11641	0	-0.78	-1.28	-1.36
	1	SLC25A37	ID_11643	0	-0.37	-1.6	-1.71
	1	EMP3	ID_11646	0	-0.56	-1.5	-5.03
	1	EMP1	ID_11648	0	-0.03	-3.77	-7.31
	1	ARTS-1	ID_11649	0	-0.5	-1.33	-2.24
	1	EEF1B2	ID_11652	0	-0.29	-0.31	-1.21
	1	SLC25A12	ID_11680	0	0.03	-0.67	-1.53
	1	SLC25A13	ID_11683	0	-1.12	-1.35	-1.75
	1	AEBP1	ID_11704	0	-0.52	-1.82	-2.96
	1	LARP1	ID_11710	0	-0.65	-1.73	-2.24
	1	FLJ20054	ID_11748	0	-0.94	-2.89	-2.61
	1	MGC34646	ID_11751	0	-0.18	-0.91	-1.62
	1	RUSC2	ID_11780	0	-0.57	-1.19	-1.72
	1	CTSLL3	ID_11798	0	-0.05	-1.31	-1.46
	1	ADAMTS2	ID_11808	0	-0.55	-1.89	-2.4
	1	TM6SF1	ID_11809	0	-0.56	-1.3	-2.64
	1	ACP2	ID_11819	0	-0.17	-0.72	-2.05
	1	SYPL1	ID_11826	0	-0.21	-0.94	-1.32
	1	MKI67	ID_11834	0	-0.57	-1.74	-2.11
	1	SPHK1	ID_11836	0	-0.89	-4.62	-5.39
	1	RBPSUH	ID_11845	0	-0.69	-0.96	-1.35
	1	LSM14A	ID_11855	0	-0.41	-0.88	-1.38
	1	MST150	ID_11866	0	-0.67	-0.97	-1.15
	1	LOC440309 /// LOC649	ID_11868	0	-1.13	-1.55	-1.73
	1	CLOCK	ID_11874	0	-1.14	-1.6	-1.88
	1	NAGPA	ID_11880	0	-0.33	-1.73	-2.74
	1	FLJ30307	ID_11921	0	-1.07	-0.82	-1.19
	1	MFAP2	ID_11926	0	0.02	-2.2	-2.73
	1	ANGPTL2	ID_11948	0	0.21	-1.56	-1.82
	1	FAM120A	ID_11998	0	-0.58	-0.64	-1.12
	1	RBMS1 /// LOC648293	ID_12014	0	-0.46	-1.66	-1.7
	1	LOC283680	ID_12022	0	-1.67	-3.16	-3.3
	1	HS3ST3A1	ID_12031	0	-0.77	-2.37	-2.76
	1	TSPAN14	ID_12033	0	-0.77	-2.99	-3.18
	1	BDNF	ID_12069	0	-0.81	-1.28	-1.64
	1	ITGBL1	ID_12103	0	-0.56	-2.04	-2.47
	1	IL1RAPL1	ID_12109	0	-0.82	-2.14	-2.13
	1	ADAR	ID_12128	0	-0.65	-0.86	-1.06
	1	GYPC	ID_12131	0	-0.26	-0.7	-2.16
	1	NFKB1	ID_12142	0	-2.06	-4.36	-4.51
	1	TBX18	ID_12168	0	-0.64	-0.88	-1.07
	1	SUMO3	ID_12178	0	-0.51	-1.11	-2.03
	1	ITPR3	ID_12200	0	-0.64	-1.26	-2.12
	1	SLC15A4	ID_12212	0	0.09	-0.73	-0.99
	1	CEP170 /// CEP170L	ID_12229	0	-0.92	-1.85	-1.86
	1	SOCS2	ID_12241	0	-1.29	-2.82	-3.05
	1	UBIAD1	ID_12243	0	-0.43	-1.49	-2.05
	1	TRERF1	ID_12251	0	-0.71	-1.47	-1.57
	1	SCARB2	ID_12279	0	-0.21	-0.83	-1.03
	1	CSTF2	ID_12284	0	0.01	-0.45	-1.01
	1	ACY1L2	ID_12288	0	-0.86	-1.52	-2.1
	1	REEP3	ID_12294	0	-0.59	-1.1	-1.68
	1	REEP5	ID_12298	0	-0.34	-0.93	-1.49
	1	SCARA3	ID_12305	0	-0.44	-1.03	-1.44
	1	KPNB1	ID_12319	0	-0.82	-1.51	-1.47
	1	APOBEC3G /// APOBEC3	ID_12322	0	-0.82	-1.23	-1.55
	1	AGPAT3 /// LOC653101	ID_12324	0	-0.39	-1.27	-2.15
	1	SMTN	ID_12325	0	-0.47	-1.17	-2.21
	1	KPNA3	ID_12331	0	-0.54	-0.52	-1.18
	1	SCARF2	ID_12337	0	0.44	-1.47	-1.74
	1	BDH2	ID_12345	0	-0.46	-0.97	-1.75
	1	BDH1	ID_12347	0	-1.23	-1.39	-2.02
	1	LOC151146	ID_12354	0	-0.28	-1.44	-1.7
	1	CRTAP	ID_12375	0	-0.38	-1.16	-1.71
	1	CRTC3	ID_12383	0	-1.22	-2.43	-2.59
	1	PDCL3 /// LOC285359	ID_12385	0	-0.71	-0.9	-1.58
	1	MTX1	ID_12390	0	-0.44	-0.75	-1.03
	1	2014-09-11	ID_12406	0	-0.32	-0.46	-1.91
	1	ELF4	ID_12421	0	-0.9	-2.05	-1.94
	1	TMCO4	ID_12467	0	-0.84	-1.03	-1.25
	1	ZXDB	ID_12521	0	-1.62	-2.01	-2.4
	1	LMO7	ID_12522	0	-0.14	-1.21	-2.17
	1	VAMP5	ID_12548	0	-0.5	-0.62	-1.47
	1	PPIL5	ID_12576	0	-0.65	-0.89	-1.71
	1	DHRSX	ID_12592	0	-1.02	-2.23	-3.28
	1	TMEM142B	ID_12599	0	-0.22	-0.92	-1.23
	1	TMEM142C	ID_12600	0	-1.18	-2.12	-2.63
	1	DKC1	ID_12602	0	-0.45	-1.05	-1.36
	1	IFI16	ID_12612	0	-0.65	-3.44	-4.51
	1	FLJ44342	ID_12622	0	-1.04	-3.57	-4.38
	1	COL12A1	ID_12655	0	-0.13	-1.35	-2.04
	1	FAM11B	ID_12659	0	-1.27	-1.68	-2.23
	1	IFI44	ID_12660	0	-0.76	-3.49	-5.27
	1	TPM3 /// TPM4	ID_12661	0	-0.31	-0.73	-2.43
	1	ASPSCR1	ID_12679	0	-0.69	-1.01	-1.44
	1	DNAPTP6	ID_12696	0	-0.55	-1.78	-3.16
	1	AGPAT7	ID_12702	0	0.05	-0.79	-1.38
	1	RIN2	ID_12723	0	-3.01	-5.96	-5.91
	1	RIN1	ID_12725	0	-0.77	-0.73	-1.07
	1	FKBP10	ID_12727	0	0.21	-1.12	-1.42
	1	RBMS1 /// C2ORF12 //	ID_12729	0	-0.53	-1.53	-1.4
	1	RIN3	ID_12731	0	-1.05	-1.31	-1.75
	1	FUT8	ID_12738	0	-0.2	-1.07	-1.54
	1	NACA /// NACAP1 ///	ID_12752	0	-1.3	-2.35	-2.62
	1	PGBD3	ID_12756	0	-0.81	-0.76	-1.96
	1	RP13-360B22.2 /// LO	ID_12790	0	-0.65	-1.06	-1.35
	1	CCNL2 /// LOC643556	ID_12794	0	-0.13	-0.97	-1.28
	1	SNX9	ID_12805	0	-0.45	-1.46	-1.64
	1	ZC3H5	ID_12806	0	-0.57	-2.07	-1.93
	1	SNX5	ID_12810	0	-0.95	-1.74	-2.38
	1	TSR1	ID_12832	0	-0.51	-0.94	-1.15
	1	KLHL22	ID_12860	0	-0.05	-0.67	-1.23
	1	ZYX	ID_12864	0	-0.39	-1.36	-1.79
	1	IRAK1	ID_12870	0	-0.57	-1.02	-2.08
	1	PRKCE	ID_12879	0	-1.55	-2.01	-2.71
	1	UBE2C	ID_12881	0	-0.37	-0.6	-1.31
	1	UBE2Z	ID_12909	0	-0.93	-0.68	-1.23
	1	SFRS2IP	ID_12921	0	-1.68	-2.26	-2.57
	1	HDAC7A	ID_12947	0	-1.04	-2.6	-2.36
	1	EMG1	ID_12960	0	-0.69	-1.99	-2.27
	1	FNBP4	ID_13000	0	-0.85	-1.78	-2.17
	1	RWDD3	ID_13007	0	-1.36	-1.88	-2.4
	1	TTC27	ID_13020	0	-0.59	-1.71	-1.99
	1	FBLIM1	ID_13051	0	0.23	-1.96	-2.38
	1	LOC493869	ID_13052	0	-0.65	-2.41	-3.37
	1	ZBTB8	ID_13078	0	-1.16	-2.11	-2.97
	1	2014-03-04	ID_13117	0	-1.69	-3.16	-4.75
	1	UTP20 /// LOC653877	ID_13133	0	-0.23	-1.37	-1.56
	1	FLJ31033	ID_13135	0	-1.15	-2.79	-4.47
	1	ZAK	ID_13141	0	-0.46	-1.42	-3.41
	1	ELOVL6	ID_13161	0	-0.4	-3.11	-4.27
	1	PHGDHL1	ID_13176	0	-0.57	-1.03	-1.27
	1	MTA1	ID_13180	0	-0.96	-1.15	-2.09
	1	THUMPD2	ID_13223	0	-1.34	-1.76	-2.05
	1	SOLH	ID_13231	0	-1.41	-1.33	-1.98
	1	DLG5	ID_13239	0	-0.42	-1.52	-2.39
	1	ZFR	ID_13252	0	-0.72	-0.74	-1.19
	1	CDK2AP1	ID_13259	0	-0.48	-0.55	-1.59
	1	JAM2	ID_13262	0	-0.03	-1.43	-2.13
	1	CHD9	ID_13278	0	-0.3	-0.59	-1.13
	1	CHD3	ID_13288	0	-0.85	-1.16	-1.97
	1	FAM20C	ID_13314	0	-0.74	-3.23	-3.87
	1	MGAT1	ID_13327	0	-0.4	-1.37	-1.9
	1	FER1L3	ID_13331	0	-0.93	-2.01	-3.55
	1	PRKX /// PRKY	ID_13341	0	-0.62	-1.25	-1.35
	1	EDNRA	ID_13368	0	0	-1.35	-1.81
	1	VEPH1	ID_13369	0	-0.6	-2.97	-4.32
	1	SH3KBP1	ID_13391	0	-0.37	-0.77	-1.68
	1	SPEG	ID_13400	0	-0.37	-1.06	-1.22
	1	DFNA5	ID_13409	0	-0.51	-1.17	-1.1
	1	RRBP1	ID_13411	0	-0.15	-0.66	-1.37
	1	GSDMDC1	ID_13412	0	-0.66	-1.15	-1.44
	1	AFF3	ID_13414	0	-0.8	-2.51	-2.98
	1	DKK2	ID_13421	0	-0.79	-1.04	-1.73
	1	LOC146909	ID_13428	0	-0.61	-0.89	-1.21
	1	LOC162073	ID_13451	0	-1.76	-4.72	-5.18
	1	LRP10	ID_13455	0	-0.19	-0.74	-1.2
	1	WNT5A	ID_13458	0	-1.14	-3.65	-4.47
	1	WNT5B	ID_13459	0	-1.3	-5.24	-6.06
	1	LASS2	ID_13505	0	-0.63	-2.51	-3.47
	1	WDR4	ID_13507	0	-0.9	-0.81	-1.81
	1	WDR1	ID_13509	0	-0.25	-0.38	-1.42
	1	PCGF2	ID_13518	0	-0.88	-0.93	-1.15
	1	PCGF6	ID_13523	0	-1.13	-1.26	-1.54
	1	LOC283824	ID_13530	0	-0.02	-0.86	-2
	1	GM632	ID_13531	0	-0.77	-1.76	-2.54
	1	MSI2	ID_13550	0	-0.16	-0.71	-1.34
	1	SETD7	ID_13579	0	-0.84	-1.84	-3.57
	1	SH3MD4	ID_13624	0	-0.58	-1.32	-1.75
	1	CAMK2N1	ID_13648	0	-0.15	-0.9	-1.2
	1	GNPNAT1	ID_13660	0	-0.22	-0.52	-1.21
	1	MMP16	ID_13686	0	0.39	-1.65	-2.42
	1	MMP14	ID_13689	0	-0.62	-2.08	-2.37
	1	RFTN1	ID_13690	0	-0.76	-1.4	-3.1
	1	EREG	ID_13698	0	0.52	-1.43	-2.09
	1	NUCKS1	ID_13720	0	-0.24	-0.99	-1.67
	1	PHF10	ID_13723	0	-0.55	-1.03	-1.35
	1	PHF11	ID_13728	0	-1.38	-3.87	-4.5
	1	PHF19	ID_13736	0	-0.76	-1.99	-3.37
	1	PHF14	ID_13739	0	-1.25	-1.06	-1.52
	1	CSNK1D	ID_13740	0	-0.72	-1.28	-1.42
	1	SNRPD1	ID_13756	0	-0.27	-0.85	-1.19
	1	TGFBI	ID_13764	0	-0.04	-1.04	-1.66
	1	TMEM126A	ID_13768	0	-0.54	-0.83	-1.16
	1	TFDP1	ID_13789	0	-0.69	-0.95	-1.66
	1	ZRF1	ID_13808	0	-0.94	-1.4	-1.91
	1	TETRAN	ID_13847	0	-0.15	-1.06	-1.15
	1	CYP20A1	ID_13853	0	-1.1	-2.11	-2.56
	1	DDEF1	ID_13868	0	-0.35	-1	-1.19
	1	KRT34	ID_13906	0	-1.92	-4.01	-4.09
	1	DKFZP434H1419	ID_13931	0	-0.85	-1.7	-1.85
	1	CERKL	ID_13932	0	-0.46	-1.74	-2.2
	1	MYO5A	ID_13945	0	-0.26	-0.62	-1.08
	1	BIVM	ID_14000	0	-0.65	-1.11	-1.41
	1	KCTD1	ID_14021	0	-0.23	-1.42	-1.86
	1	SPCS2	ID_14039	0	-0.24	-1.28	-1.73
	1	C5ORF28	ID_14046	0	-0.33	-0.93	-1.21
	1	C5ORF14	ID_14068	0	-0.46	-1.95	-4.17
	1	C5ORF15	ID_14070	0	-0.18	-0.96	-1.63
	1	URG4	ID_14073	0	-2.72	-2.24	-3.34
	1	PPP4R1	ID_14080	0	-0.66	-1.31	-1.38
	1	TNC	ID_14081	0	0.04	-1.38	-3.05
	1	ERCC6	ID_14089	0	-0.34	-0.95	-1.38
	1	ENOSF1	ID_14102	0	-0.98	-1.22	-1.57
	1	TMEM132A	ID_14153	0	0.07	-0.8	-1.06
	1	SURF4	ID_14164	0	-0.2	-0.67	-1.13
	1	C9ORF30	ID_14172	0	-1.32	-2.4	-2.35
	1	ESM1	ID_14185	0	-1.98	-5.89	-7.1
	1	STS	ID_14241	0	-0.82	-0.97	-1.71
	1	G0S2	ID_14249	0	-1.3	-3.48	-5.12
	1	KIRREL	ID_14263	0	-0.51	-4.41	-5.4
	1	FLJ21986	ID_14273	0	-0.44	-2.61	-4.17
	1	RPN1	ID_14292	0	-0.07	-0.69	-1.09
	1	ACTN1	ID_14299	0	-0.39	-0.63	-1.93
	1	ARID1B	ID_14303	0	-1.22	-1.54	-1.79
	1	SCCPDH	ID_14308	0	-0.77	-0.92	-1.46
	1	MGC3196	ID_14312	0	-1.31	-2.39	-2.36
	1	AKT1S1	ID_14320	0	-0.56	-0.83	-1.31
	1	ZFHX1B	ID_14323	0	-1.06	-2.45	-2.73
	1	RPS16 /// LOC441876	ID_14335	0	-0.77	-0.81	-1.1
	1	EFEMP2	ID_14344	0	-0.84	-1.1	-1.79
	1	WHSC1	ID_14350	0	-1.28	-1.85	-2.43
	1	ARID5B	ID_14376	0	-0.04	-1.54	-1.87
	1	TOR1A	ID_14397	0	-0.26	-1.9	-3.76
	1	INPP5E	ID_14400	0	-1.1	-1.66	-1.91
	1	TCIRG1	ID_14404	0	-0.22	-0.79	-1.46
	1	RAVER1	ID_14435	0	-1.14	-0.98	-1.39
	1	TBC1D9B	ID_14445	0	-0.73	-0.86	-1.39
	1	CEP170	ID_14476	0	-1.14	-1.73	-2.06
	1	ACTR3	ID_14499	0	-0.33	-0.59	-1.12
	1	H6PD	ID_14523	0	-0.12	-1.48	-1.65
	1	ADAM19	ID_14528	0	0.26	-1.88	-2.29
	1	USP7	ID_14533	0	-0.33	-0.9	-1.36
	1	USP3	ID_14538	0	-0.36	-1.02	-1.65
	1	SLC19A1	ID_14548	0	-0.5	-1.78	-2.75
	1	LANCL2	ID_14552	0	-0.84	-2.17	-2.17
	1	SRI	ID_14602	0	-0.33	-0.7	-1.47
	1	SRM	ID_14610	0	-0.4	-0.4	-1.24
	1	C9ORF94	ID_14621	0	-0.22	-2.8	-3.65
	1	MYLK	ID_14661	0	-0.36	-0.89	-1.88
	1	ST7	ID_14663	0	-0.92	-2.39	-2.42
	1	PRRX1	ID_14673	0	-1.3	-3.69	-3.88
	1	TM9SF4	ID_14689	0	-0.41	-1.58	-1.97
	1	TM9SF3	ID_14690	0	-0.17	-1.02	-1.6
	1	C9ORF86	ID_14691	0	-0.5	-0.6	-1.03
	1	TM9SF1	ID_14692	0	-0.37	-1.34	-1.94
	1	C9ORF88	ID_14705	0	-0.53	-0.86	-1.27
	1	C9ORF125	ID_14706	0	-1.04	-2.55	-3.14
	1	TNFRSF1A	ID_14739	0	-0.46	-2.67	-4.94
	1	MARVELD1	ID_14741	0	-0.8	-2.44	-3.49
	1	C9ORF103	ID_14762	0	-0.59	-1.89	-2.14
	1	SON	ID_14782	0	-0.9	-0.87	-1.1
	1	MED28	ID_14807	0	-0.68	-0.88	-1.11
	1	RREB1	ID_14813	0	-1.72	-2.15	-2.47
	1	LIG3	ID_14819	0	-0.35	-1.33	-1.26
	1	MED12	ID_14820	0	-0.7	-1.96	-2.04
	1	SFRS1 /// INTS8	ID_14838	0	-0.7	-0.98	-1.28
	1	SRPX	ID_14859	0	-0.01	-0.68	-1.37
	1	IL13RA1	ID_14867	0	-0.04	-0.96	-1.2
	1	DEGS1	ID_14890	0	-0.18	-0.91	-1.23
	1	CMPK	ID_14892	0	-0.64	-1.03	-2
	1	ZMYND11	ID_14893	0	-1.09	-3.02	-3.43
	1	MPDU1	ID_14905	0	-0.19	-1.65	-2.89
	1	PHLDB2	ID_14919	0	-0.71	-1.96	-2.43
	1	FNDC3A	ID_14925	0	-0.7	-1.22	-1.59
	1	FNDC3B	ID_14926	0	-0.62	-1.2	-1.47
	1	TPBG	ID_14965	0	-0.86	-1.77	-2.04
	1	ABL2	ID_14975	0	-1.17	-1.37	-1.7
	1	DOC1	ID_14989	0	-1.42	-2.95	-3.66
	1	MAN2A2	ID_14992	0	-0.31	-1.24	-1.28
	1	MAN2A1	ID_14993	0	0.05	-1.2	-1.78
	1	LOC646919 /// LOC650	ID_15003	0	-0.52	-2.07	-1.98
	1	NCSTN	ID_15014	0	-0.27	-1.21	-1.87
	1	UTRN	ID_15022	0	0.06	-1.25	-1.41
	1	RND3	ID_15037	0	-0.96	-1.31	-1.72
	1	ZBTB38	ID_15104	0	-2.37	-3.51	-3.86
	1	MMP19 /// LOC652543	ID_15107	0	-0.42	-1.44	-2.29
	1	UBE1DC1	ID_15126	0	-0.34	-0.58	-1.08
	1	ZBTB24	ID_15129	0	-1.37	-1.25	-1.82
	1	PEX14	ID_15172	0	-1.18	-1.48	-1.65
	1	MAGED4 /// LOC653210	ID_15185	0	-0.24	-1.5	-1.81
	1	C6ORF51	ID_15217	0	-0.59	-1.3	-3.98
	1	C6ORF48	ID_15232	0	-0.54	-1.26	-1.18
	1	C6ORF49	ID_15235	0	-0.33	-0.46	-1.03
	1	CCDC14	ID_15267	0	-0.69	-1.38	-1.47
	1	ITGB5	ID_15273	0	-0.31	-1.25	-2.71
	1	C6ORF75	ID_15293	0	-0.57	-1.11	-1.43
	1	PODXL	ID_15303	0	0.11	-1.24	-2.21
	1	ITGA2	ID_15305	0	-0.28	-2.44	-3.13
	1	ITGA3	ID_15306	0	-0.33	-1.34	-1.76
	1	ITGA4	ID_15307	0	-0.57	-1.84	-2.19
	1	ITGA6	ID_15310	0	-0.19	-1.71	-2.75
	1	ITGA5	ID_15312	0	0.07	-1.35	-2.22
	1	C6ORF61	ID_15315	0	-1.81	-1.36	-2
	1	CCDC44	ID_15349	0	-0.77	-1.2	-1.58
	1	CCDC50	ID_15361	0	-0.14	-0.83	-1.67
	1	TMEM87B	ID_15392	0	-0.23	-1.02	-1.15
	1	TMEM87A	ID_15394	0	-1.59	-2.26	-2.42
	1	CCDC76	ID_15407	0	-0.44	-1.03	-1.32
	1	FLJ44894	ID_15422	0	-0.99	-1.28	-1.42
	1	LHFP	ID_15439	0	-0.42	-1.61	-1.52
	1	CCDC86	ID_15483	0	-0.26	-0.73	-1.17
	1	CCDC80	ID_15488	0	0.01	-1.45	-2.36
	1	DPP7	ID_15510	0	-0.3	-0.83	-1.03
	1	TPX2	ID_15514	0	-0.44	-0.71	-1.23
	1	DARS2	ID_15516	0	-0.8	-1.25	-1.69
	1	EXDL2	ID_15522	0	-0.55	-0.67	-1.16
	1	CLN6	ID_15526	0	0.01	-0.9	-1.18
	1	FADS2	ID_15544	0	-0.97	-1.32	-2.07
	1	SSR3	ID_15560	0	-0.12	-0.79	-1.22
	1	STK36	ID_15569	0	-0.25	-0.59	-1.01
	1	MTHFD1L	ID_15574	0	-0.64	-1.14	-1.56
	1	STK39	ID_15577	0	-0.64	-0.83	-1.26
	1	NUDT3	ID_15589	0	-0.6	-0.99	-1.83
	1	STK10	ID_15607	0	-0.49	-0.79	-1.12
	1	FLJ43339	ID_15662	0	-3.23	-5.46	-5.76
	1	TARBP1	ID_15668	0	-0.73	-1.09	-1.61
	1	ACVR1	ID_15680	0	-0.2	-0.97	-1.51
	1	SPFH1	ID_15735	0	-0.16	-1.49	-2.09
	1	LYPD1	ID_15743	0	-0.15	-1.44	-3.21
	1	LOC54103	ID_15746	0	-1.4	-2.89	-3.42
	1	STC2	ID_15769	0	-0.19	-1.88	-3.19
	1	LGTN	ID_15820	0	-0.37	-0.54	-1.11
	1	TOP2A	ID_15828	0	-0.38	-0.38	-1.07
	1	LOC374443	ID_15833	0	-0.38	-1.46	-1.43
	1	UNG	ID_15843	0	-0.93	-1.62	-1.73
	1	MRPL15	ID_15856	0	-0.74	-1.42	-2.2
	1	FLJ35934	ID_15921	0	-0.16	-1.09	-1.17
	1	EFCAB2	ID_15941	0	-1	-1.8	-2.53
	1	PPP1R14B	ID_15975	0	-0.23	-0.95	-2.6
	1	GPRASP2	ID_15980	0	-0.83	-2.9	-3.59
	1	GPRASP1	ID_15982	0	-0.32	-1.55	-1.79
	1	TPM1	ID_16000	0	-0.4	-0.84	-2.06
	1	RGS20	ID_16030	0	-0.94	-2.16	-4.02
	1	PCBD1	ID_16050	0	-0.37	-0.56	-1.72
	1	RCC2	ID_16054	0	-1.2	-2.43	-2.38
	1	RCC1	ID_16065	0	-0.71	-1.33	-1.46
	1	LOC220906	ID_16088	0	-0.45	-0.72	-1.06
	1	EVI1	ID_16101	0	-1.3	-3.22	-2.93
	1	ABHD7	ID_16121	0	-1.36	-3.8	-3.98
	1	AK3L1	ID_16133	0	-0.35	-1.14	-1.53
	1	PKD2	ID_16139	0	-0.36	-1.13	-1.34
	1	BNC2	ID_16152	0	-0.88	-2.21	-2.23
	1	EVC2	ID_16192	0	-1.34	-2.28	-2.69
	1	TIMELESS	ID_16193	0	-0.79	-1.2	-1.74
	1	THSD4	ID_16213	0	-0.4	-0.96	-2.47
	1	E2F7	ID_16228	0	-0.56	-1.16	-1.5
	1	TMF1	ID_16238	0	-1.42	-1.76	-2.13
	1	SH2D4A	ID_16239	0	-1.51	-3	-3.41
	1	HSPC111	ID_16241	0	-0.64	-0.73	-1.31
	1	TBL1XR1	ID_16245	0	-0.73	-2.13	-1.99
	1	SDC1	ID_16252	0	-0.21	-1.65	-3.57
	1	AMID	ID_16258	0	-0.39	-1.12	-1.13
	1	APPBP1	ID_16265	0	-0.32	-1.01	-1.2
	1	DKFZP762E1312	ID_16278	0	-0.77	-1.06	-1.29
	1	UCKL1	ID_16280	0	-0.77	-0.92	-2.46
	1	RCN1	ID_16283	0	-0.5	-1.87	-3.08
	1	GPR126	ID_16286	0	0.22	-1.5	-1.77
	1	GPR125	ID_16287	0	-0.58	-1.96	-2.46
	1	VEGFC	ID_16312	0	-2.54	-5.4	-5.67
	1	TGFB1I1	ID_16321	0	-1.6	-3.38	-3.79
	1	GPR161	ID_16378	0	-0.17	-0.88	-1.07
	1	ANPEP	ID_16381	0	-0.36	-1.94	-3.55
	1	GPR176	ID_16391	0	-0.56	-1.56	-2.72
	1	GPR177	ID_16396	0	0.21	-1.33	-2.52
	1	GPR178	ID_16397	0	-0.32	-1.24	-1.66
	1	GPR180	ID_16404	0	-0.45	-1.2	-1.73
	1	PDCD6 /// AHRR	ID_16408	0	-1.06	-1.43	-1.82
	1	RPL7L1	ID_16424	0	-0.62	-0.75	-1.2
	1	COG1	ID_16426	0	-0.63	-1.22	-2.07
	1	FAM21C /// LOC653450	ID_16461	0	-0.5	-0.97	-1
	1	RBX1	ID_16474	0	-0.55	-0.92	-1.16
	1	CTBP2 /// LOC645291	ID_16475	0	-0.67	-2.12	-2.46
	1	C2ORF47	ID_16490	0	-0.7	-0.91	-1.31
	1	C2ORF32	ID_16516	0	-0.8	-2.58	-5.12
	1	COMT	ID_16564	0	-0.38	-1.11	-2.16
	1	C2ORF10	ID_16581	0	-1.7	-4.55	-3.95
	1	GPR107	ID_16592	0	-0.75	-1.82	-1.86
	1	C16ORF30	ID_16604	0	-0.64	-0.74	-1.47
	1	LOC203427	ID_16624	0	-1.07	-0.86	-1.62
	1	AGXT2L2	ID_16626	0	-0.59	-1.07	-1.32
	1	LOC203411	ID_16663	0	-0.37	-1.05	-1.15
	1	EIF3S10	ID_16700	0	-0.58	-0.95	-1.19
	1	QTRT1	ID_16734	0	-0.39	-1.12	-3
	1	PAK1IP1	ID_16760	0	-0.84	-1.01	-1.56
	1	SELT	ID_16766	0	-0.2	-0.4	-1.01
	1	BARD1	ID_16786	0	-0.71	-0.84	-1.14
	1	DRAM	ID_16788	0	-0.68	-3.53	-3.99
	1	NETO2	ID_16810	0	-0.37	-1.42	-1.61
	1	LRIG1	ID_16820	0	0.11	-0.85	-1.39
	1	CTPS2	ID_16821	0	-1.39	-2.07	-2.85
	1	LRIG3	ID_16823	0	-0.15	-1.36	-1.82
	1	DOCK2	ID_16825	0	-2.59	-5.56	-5.76
	1	DOCK7	ID_16844	0	-0.25	-0.69	-1.36
	1	DOCK4	ID_16850	0	-0.1	-1.08	-1.07
	1	ALG8	ID_16863	0	-0.44	-1.43	-1.83
	1	ALG9	ID_16864	0	-0.46	-1.07	-1.88
	1	RFWD2	ID_16871	0	-0.39	-0.7	-1.02
	1	FRMD4A	ID_16875	0	-1.79	-4.14	-3.95
	1	CHD1L	ID_16890	0	-0.51	-0.85	-1.68
	1	B3GALT6	ID_16908	0	-1.42	-1.72	-2.09
	1	B3GALTL	ID_16918	0	-0.17	-1.86	-2.98
	1	HOXA11	ID_16947	0	-1.72	-2.05	-2.42
	1	ALS2CR7	ID_16951	0	-2.02	-3.93	-5.43
	1	MOV10	ID_16956	0	-0.39	-1.21	-2.38
	1	TRAM2	ID_16958	0	0.09	-1.15	-1.77
	1	HNRPH3	ID_16960	0	-0.94	-1.44	-1.78
	1	SMAD7	ID_16970	0	-1.89	-2.39	-3.4
	1	SMAD3	ID_16974	0	-0.72	-2.67	-2.55
	1	MESDC1	ID_16996	0	-1.14	-2.41	-3
	1	MESDC2	ID_17001	0	-0.4	-0.82	-1.35
	1	HNRPDL	ID_17003	0	-0.05	-1.18	-1.47
	1	GTF2I	ID_17006	0	-1.02	-1.76	-1.97
	1	HNRPAB	ID_17039	0	-0.29	-0.61	-1.07
	1	TNS3	ID_17048	0	-1.18	-3.04	-3.94
	1	PIGB	ID_17083	0	-0.61	-2.52	-2.59
	1	TNPO2	ID_17120	0	-0.82	-1.62	-1.89
	1	AMPD3	ID_17131	0	-1.62	-3.58	-3.9
	1	RAP80	ID_17139	0	-0.58	-0.93	-1.33
	1	C1ORF78	ID_17155	0	-0.64	-1.96	-2.32
	1	C1ORF85	ID_17172	0	-0.24	-1.01	-2.27
	1	DCBLD2	ID_17185	0	-0.24	-1.37	-1.99
	1	DCBLD1	ID_17186	0	-0.43	-1.08	-1.15
	1	KIF4A	ID_17187	0	-0.59	-1.01	-1.23
	1	SERPINH1	ID_17191	0	-0.61	-4.77	-7.48
	1	C1ORF54	ID_17195	0	-0.18	-0.48	-1.2
	1	ARMCX6 /// LOC653354	ID_17211	0	-0.9	-1.55	-1.53
	1	PPRC1	ID_17245	0	-2.36	-2.76	-3.28
	1	LDLR	ID_17251	0	-1.03	-1.67	-2.71
	1	EEF2K	ID_17263	0	-0.22	-0.74	-1.57
	1	RAP2C	ID_17272	0	-0.57	-1.04	-1.15
	1	CLIC1	ID_17278	0	-0.23	-0.64	-1.27
	1	SERPINB8	ID_17289	0	-0.79	-1.71	-2.83
	1	SERPINB7	ID_17291	0	-0.39	-1.24	-2.45
	1	SERPINB2	ID_17293	0	-0.69	-2.5	-4.57
	1	SFPQ	ID_17332	0	0.01	-0.56	-1.37
	1	AOX1	ID_17333	0	-0.46	-1.14	-2.66
	1	KIF23	ID_17365	0	-0.72	-1.46	-1.75
	1	RAI1	ID_17369	0	-1	-2.34	-3.13
	1	C1ORF31	ID_17375	0	-0.83	-1.19	-1.32
	1	C1ORF33	ID_17382	0	-0.54	-1.12	-1.39
	1	E4F1	ID_17392	0	-0.32	-0.58	-1.01
	1	KIF15	ID_17406	0	-1.13	-1.39	-1.97
	1	C1ORF43	ID_17411	0	-0.68	-1.17	-1.72
	1	RAGE	ID_17422	0	-0.98	-1.89	-2.25
	1	SCRN1	ID_17443	0	-0.84	-2.63	-3.35
	1	C1ORF24	ID_17451	0	-0.07	-0.61	-1.03
	1	COL5A2	ID_17456	0	0.1	-1.66	-2.95
	1	HMGN2	ID_17473	0	-0.44	-0.79	-1.52
	1	HMGN4	ID_17476	0	-0.47	-1.09	-1.3
	1	MYD88	ID_17479	0	-0.65	-1.42	-1.73
	1	PARP12	ID_17493	0	-0.76	-1.62	-1.56
	1	PARP14	ID_17496	0	-0.16	-1.9	-2.17
	1	ANGEL2	ID_17503	0	-1.27	-1.8	-2.64
	1	CNIH3	ID_17519	0	0.27	-2.83	-3.37
	1	NCOR1	ID_17524	0	-0.67	-1.31	-1.32
	1	NCOR2	ID_17526	0	-0.65	-1.68	-1.99
	1	TUBB6	ID_17537	0	-0.32	-0.72	-1.51
	1	ICAM1	ID_17541	0	0.03	-1.22	-1.44
	1	ICAM2	ID_17544	0	-0.29	-0.81	-2.02
	1	MBOAT1	ID_17581	0	-0.82	-1.19	-2.05
	1	SNHG7	ID_17616	0	-0.14	-1.05	-1.43
	1	SNHG3	ID_17618	0	-1.31	-2.06	-2.19
	1	CIAS1	ID_17623	0	-0.97	-3.26	-2.98
	1	RHOBTB3	ID_17635	0	-0.07	-1.48	-1.95
	1	PHF2	ID_17638	0	-1.35	-4.2	-4.07
	1	FLJ20674	ID_17665	0	-0.85	-1.42	-1.47
	1	PHC2	ID_17672	0	-0.34	-0.98	-1.37
	1	TLK2	ID_17735	0	-0.67	-1.61	-1.42
	1	ERBB2	ID_17757	0	-0.22	-2.3	-2.65
	1	SGSH	ID_17777	0	0	-0.97	-1.72
	1	PDIA3	ID_17778	0	-0.22	-0.69	-1.07
	1	PDIA4	ID_17787	0	0.11	-0.7	-1.25
	1	RBM3	ID_17843	0	-0.9	-0.85	-2.31
	1	TNFAIP2	ID_17874	0	0.3	-1.35	-1.88
	1	ANLN	ID_17879	0	-0.12	-0.83	-1.56
	1	RBMX	ID_17894	0	-0.38	-1.12	-2.01
	1	LOC203274	ID_17921	0	-1.65	-1.39	-2.2
	1	PDCD2L	ID_17954	0	-0.49	-0.57	-1.35
	1	IGF1R	ID_17966	0	0.04	-0.52	-1.13
	1	ALDH1A3	ID_17968	0	-0.59	-1.3	-1.61
	1	COL4A2	ID_17976	0	0.11	-1.04	-2.07
	1	COL4A5	ID_17983	0	-0.16	-1.17	-2.15
	1	PPP1R9B	ID_17985	0	-0.4	-0.76	-1.61
	1	PH-4	ID_17995	0	-0.35	-1.78	-2.87
	1	CRLS1	ID_18006	0	-0.33	-0.76	-1.32
	1	UHRF1	ID_18017	0	-0.89	-1.29	-1.52
	1	PGM5	ID_18020	0	-0.31	-1.02	-1.86
	1	PGM1	ID_18024	0	-0.45	-0.52	-1.5
	1	MACF1	ID_18034	0	-0.13	-0.92	-1.32
	1	WASPIP	ID_18035	0	-0.55	-1.15	-1.35
	1	C12ORF24	ID_18067	0	-0.93	-1.83	-1.84
	1	LPGAT1	ID_18075	0	-0.18	-1.22	-1.65
	1	SGCE	ID_18092	0	-0.33	-1.73	-2.07
	1	SGCB	ID_18096	0	-0.48	-0.82	-1.05
	1	ANKRD40	ID_18144	0	-0.68	-1.02	-1.28
	1	ANKRD44	ID_18153	0	0.08	-1.16	-2.16
	1	SPRED1	ID_18189	0	-1	-1.95	-2.1
	1	ACIN1	ID_18190	0	-0.74	-1.33	-1.34
	1	MOXD1	ID_18193	0	-0.24	-1.21	-1.48
	1	P18SRP	ID_18204	0	-0.53	-0.97	-1.33
	1	LAPTM5	ID_18206	0	-0.11	-0.95	-1.07
	1	CPS1	ID_18221	0	-0.22	-0.36	-1.13
	1	LDB2	ID_18233	0	-0.38	-0.67	-2.04
	1	PSMB10	ID_18240	0	-0.57	-0.56	-1.97
	1	DTX3	ID_18267	0	-1.42	-2.3	-2.71
	1	MAP3K5	ID_18285	0	-0.52	-1.66	-1.67
	1	LRRC17	ID_18364	0	-0.06	-3.6	-6.29
	1	BRD9	ID_18374	0	-0.73	-0.78	-1.36
	1	THOC4	ID_18399	0	-0.11	-0.82	-2.03
	1	ALDH18A1	ID_18408	0	-0.31	-1.09	-1.84
	1	TRIM14	ID_18416	0	-0.74	-0.83	-1.88
	1	BRD1	ID_18433	0	-1.05	-2.64	-3.86
	1	LRRC41	ID_18438	0	-0.8	-2.6	-3.76
	1	TIA1	ID_18484	0	-1.02	-1.91	-1.86
	1	GLT25D1	ID_18524	0	-0.58	-1.29	-1.19
	1	AIM1	ID_18527	0	-0.25	-1.08	-1.43
	1	LRRC8C	ID_18538	0	-1.44	-2.77	-3.4
	1	LRRC8D	ID_18539	0	-0.38	-1.77	-2.08
	1	GLT25D2	ID_18546	0	-1.69	-1.53	-2.39
	1	TAF9B /// LOC653068	ID_18547	0	-0.45	-1.38	-2.69
	1	TIE1	ID_18549	0	-0.03	-0.94	-1.59
	1	RGMB	ID_18581	0	-1.68	-2.66	-3.07
	1	WDFY3	ID_18585	0	-0.95	-1.86	-2.38
	1	WDFY2	ID_18588	0	-0.1	-0.85	-1.14
	1	BAX	ID_18594	0	-0.32	-0.51	-1.11
	1	CHRAC1	ID_18619	0	-0.59	-1.29	-1.42
	1	TXNDC1	ID_18622	0	-0.28	-0.43	-1.02
	1	TXNDC5	ID_18625	0	-0.4	-1.09	-1.78
	1	LMNB2	ID_18636	0	-0.59	-1.17	-1.95
	1	IL27RA	ID_18659	0	-0.57	-2.81	-2.82
	1	AES	ID_18661	0	-0.23	-0.61	-1.34
	1	PFAS	ID_18687	0	-0.53	-1.06	-1.28
	1	VEGF	ID_18726	0	-0.05	-0.84	-1.49
	1	C21ORF25	ID_18777	0	0.11	-1.74	-2
	1	AK5	ID_18814	0	-0.54	-1.35	-2.57
	1	TRIM56	ID_18823	0	-0.88	-1.67	-2.28
	1	TRIM59	ID_18825	0	-0.71	-1.06	-1.67
	1	LOC440900	ID_18830	0	-0.5	-1.56	-1.98
	1	SPIN2 /// SPIN-2	ID_18839	0	-1.57	-2.77	-3.05
	1	FUBP1	ID_18848	0	-0.76	-1.71	-1.78
	1	SUHW4	ID_18859	0	-1.94	-2.76	-3.37
	1	SP100	ID_18871	0	-0.07	-1.41	-2.46
	1	CRIM1	ID_18908	0	0.12	-0.77	-1.47
	1	MGC19604	ID_18916	0	-0.2	-0.99	-1.54
	1	RPAP1	ID_18920	0	-0.99	-0.99	-1.34
	1	VGLL4	ID_18970	0	-0.63	-1.16	-1.26
	1	C21ORF96	ID_19019	0	-0.9	-1.87	-2.64
	1	C21ORF66	ID_19078	0	-0.8	-0.87	-1.04
	1	LOC642711	ID_19094	0	-0.79	-1.39	-1.66
	1	COL6A3	ID_19095	0	-0.14	-1.46	-3.78
	1	PER2	ID_19097	0	0.56	-1.47	-2.17
	1	COL6A2	ID_19098	0	-0.19	-1.04	-1.2
	1	COL6A1	ID_19101	0	-0.23	-0.74	-1.59
	1	C21ORF45	ID_19128	0	-0.61	-1.01	-1.52
	1	TAPBPL	ID_19132	0	-0.96	-1.27	-1.75
	1	CDC91L1	ID_19141	0	-0.31	-1.49	-1.58
	1	XPO4	ID_19146	0	-0.79	-0.85	-1.06
	1	HMGB2	ID_19175	0	-1	-1.83	-1.92
	1	HMGB3	ID_19176	0	-0.79	-1.31	-1.48
	1	POLE2	ID_19188	0	-0.94	-1.39	-1.51
	1	POLE3	ID_19190	0	-0.51	-1.22	-1.35
	1	NDST1	ID_19219	0	-0.27	-2.77	-2.84
	1	NDST2	ID_19220	0	-0.62	-1.24	-1.47
	1	PEX6	ID_19221	0	0.23	-0.89	-1.28
	1	HMGA2	ID_19248	0	-2.22	-6.58	-8.69
	1	GCN1L1	ID_19266	0	-0.35	-0.81	-1.06
	1	COL13A1	ID_19277	0	-0.07	-2.33	-4.84
	1	FUCA2	ID_19279	0	-0.48	-1.28	-1.77
	1	IFIT3	ID_19282	0	-1.98	-3.27	-3.61
	1	IFIT2	ID_19283	0	-1.23	-2.8	-2.77
	1	IFIT5	ID_19288	0	-0.93	-0.99	-1.74
	1	TWIST2	ID_19310	0	-0.35	-1.28	-2.83
	1	NUP54	ID_19330	0	-0.47	-0.79	-1.17
	1	TAX1BP3	ID_19335	0	-0.43	-0.82	-1.86
	1	POLR1A	ID_19357	0	-0.28	-0.6	-1.16
	1	POLR2A	ID_19383	0	-0.64	-0.68	-1.11
	1	POLR3C	ID_19406	0	-0.15	-0.79	-1.17
	1	POLR3E	ID_19410	0	-1.1	-1.35	-1.59
	1	CSPG4	ID_19427	0	0.19	-1.52	-2.46
	1	RUNX1	ID_19468	0	-0.54	-1.4	-1.32
	1	RUNX2	ID_19469	0	-2.55	-5.08	-5.13
	1	NR6A1	ID_19485	0	-0.25	-0.75	-1.05
	1	CUL7	ID_19550	0	-0.53	-0.62	-1.26
	1	PIK3CA	ID_19554	0	-0.39	-1.61	-2.31
	1	CAB39	ID_19556	0	-0.61	-1.12	-1.21
	1	CUL1	ID_19557	0	-1.24	-3.12	-3.08
	1	STAG2	ID_19558	0	-0.87	-2.65	-2.7
	1	STAG1	ID_19559	0	-0.98	-2.35	-2.12
	1	NAT10	ID_19590	0	-0.63	-1.19	-1.51
	1	COL16A1	ID_19600	0	-0.88	-2	-2.45
	1	SMURF2	ID_19604	0	-1.06	-2.45	-2.93
	1	MGC16291	ID_19639	0	-0.23	-1.89	-2
	1	AKAP2 /// PALM2-AKAP	ID_19648	0	-0.21	-0.87	-1.32
	1	SLC8A1	ID_19654	0	-0.1	-1.58	-1.8
	1	CCDC5	ID_19700	0	-0.35	-0.68	-1.35
	1	ABI3BP	ID_19727	0	-0.29	-0.86	-1.01
	1	PHACTR1	ID_19742	0	-1.93	-3.95	-5.12
	1	EGLN2	ID_19795	0	-0.62	-0.66	-1.39
	1	RUTBC1	ID_19800	0	-0.62	-1.12	-1.59
	1	COL27A1	ID_19804	0	-0.67	-3.23	-3.86
	1	ATXN10	ID_19825	0	-0.27	-0.64	-1.69
	1	TCF25	ID_19855	0	-0.59	-1.03	-1.53
	1	TCF12	ID_19860	0	-1.03	-1.61	-1.92
	1	FANCG	ID_19873	0	-0.36	-0.81	-1.42
	1	TRIOBP	ID_19883	0	-0.71	-2.08	-3.25
	1	SLC39A13	ID_19888	0	-0.49	-1.64	-1.51
	1	AP4S1	ID_19895	0	-0.29	-1.38	-1.47
	1	VLDLR	ID_19898	0	-0.18	-0.86	-1.09
	1	FLJ20245	ID_19899	0	-0.54	-1.44	-2.07
	1	GABPB2	ID_19911	0	-1.72	-2.62	-2.73
	1	LOC51315	ID_19921	0	-0.26	-1.27	-2.78
	1	TH1L	ID_19926	0	-0.72	-0.85	-1.2
	1	FLJ20254	ID_19986	0	0.1	-1.08	-1.62
	1	NBL1	ID_19989	0	-0.22	-0.77	-1.33
	1	C1RL	ID_19991	0	-1.03	-0.91	-1.39
	1	RFT1	ID_19995	0	-0.55	-1.28	-2.34
	1	SKP2	ID_20010	0	-0.22	-0.55	-1.21
	1	GRB10	ID_20016	0	-0.45	-1.12	-1.21
	1	TRIP11	ID_20102	0	-0.95	-1.26	-1.4
	1	TRIP12	ID_20103	0	-0.54	-1.33	-1.46
	1	RASA1	ID_20104	0	-0.87	-0.91	-1.17
	1	MGC16169	ID_20109	0	0.34	-1.55	-1.73
	1	CTDSPL	ID_20125	0	-0.64	-0.77	-1.39
	1	SLC7A6	ID_20135	0	-0.26	-1.35	-1.57
	1	POM121 /// LOC340318	ID_20145	0	-0.74	-0.98	-1.7
	1	SLC7A1	ID_20192	0	-0.48	-1.57	-1.93
	1	PDE8A	ID_20217	0	-0.52	-0.79	-1.05
	1	MBNL1	ID_20223	0	-0.07	-0.87	-2
	1	DPYSL3	ID_20251	0	-0.38	-0.72	-2.2
	1	C11ORF41	ID_20273	0	-0.6	-3.65	-4.64
	1	PLOD2	ID_20283	0	-0.32	-1.24	-1.37
	1	PLOD3	ID_20285	0	-0.14	-1.21	-1.46
	1	C11ORF31	ID_20298	0	-0.5	-0.69	-2.05
	1	NAV3	ID_20300	0	-2.88	-7.27	-7.96
	1	NAV1	ID_20311	0	-0.11	-1.61	-2.8
	1	SLC2A10	ID_20325	0	-0.44	-2.25	-3.06
	1	RFFL	ID_20333	0	-0.96	-0.89	-1.42
	1	S100A16	ID_20352	0	-0.47	-1.39	-3.74
	1	DNAJC11	ID_20386	0	-0.29	-0.8	-1.05
	1	CHRDL1	ID_20399	0	-0.11	-0.98	-1.23
	1	STAT6	ID_20409	0	-0.73	-2.82	-4.27
	1	FZD1	ID_20424	0	-0.82	-1.11	-1.59
	1	FZD2	ID_20427	0	-1.14	-2.92	-3.82
	1	SAMD3	ID_20429	0	-1.41	-2.92	-3.75
	1	PBX2	ID_20445	0	-1.02	-2.47	-2.23
	1	CTPS	ID_20453	0	-1.03	-1.67	-2.76
	1	MAP4K3	ID_20471	0	-0.3	-1	-1.16
	1	MAP4K4	ID_20473	0	-0.63	-1.83	-3.17
	1	MAP4K5	ID_20476	0	-0.27	-1.31	-1.82
	1	HECTD1	ID_20503	0	-0.7	-1.74	-2
	1	CPNE2	ID_20532	0	-0.64	-0.74	-1
	1	KCTD14	ID_20535	0	-0.13	-1.25	-1.6
	1	POMT1	ID_20544	0	0.01	-0.63	-1.14
	1	C11ORF69	ID_20549	0	-0.79	-4.11	-5.26
	1	CTSZ	ID_20551	0	-0.22	-1.34	-1.93
	1	CTSS	ID_20557	0	-0.48	-2.18	-2.69
	1	CTSL	ID_20561	0	0.07	-0.74	-1.6
	1	CTSC	ID_20572	0	-0.21	-1.29	-2.56
