# Supplementary material for: Systematic Analysis of Time-Series Gene Expression Data on Tumor Cell-Selective Apoptotic Responses to HDAC Inhibitors
Source: Comput Math Methods Med. 2014 Oct 13;2014:867289. doi: 10.1155/2014/867289 (PMC4211306; doi:10.1155/2014/867289)
Supplement: Supplementary file 1 — Table S1. H-score of all pathways for tumor and normal samples: This table lists the name, category, website and H-score values for all 1307 pathway. Table S2. Illustrative pathways belonging to term "No responding": This table lists the name, category, website and TVPC patterns for "No responding" pathways. Table S3. Illustrative pathways belonging to term "Consistent responding": This table lists the name, category, website and TVPC patterns for "Consistent responding" pathways. Table S4. Illustrative pathways belonging to term "Tumor specific responding": This table lists the name, category, website and TVPC patterns for "Tumor specific responding" pathways. Table S5. Illustrative pathways belonging to term "Normal specific responding": This table lists the name, category, web site and TVPC patterns for "Normal specific responding" pathways. Table S6. Illustrative pathways belonging to term "Divergent responding": This table lists the name, category, website and TVPC patterns for "Divergent responding" pathways. Table S7. Genes within profile #0 for normal samples: This table contains all genes within profile #0 for normal samples, and lists the normalized expression data to the right of gene symbol. Table S8. Genes within profile #2 for normal samples: This table contains all genes within profile #2 for normal samples, and lists the normalized expression data to the right of gene symbol. Table S9. Genes within profile #9 for normal samples: This table contains all genes within profile #9 for normal samples, and lists the normalized expression data to the right of gene symbol. Table S10. Genes within profile #12 for normal samples: This table contains all genes within profile # 12 for normal samples, and lists the normalized expression data to the right of gene symbol. Table S11. Genes within profile #14 for normal samples: This table contains all genes within profile #14 for normal samples, and lists the normalized expression data to the right of gene symbol. Ta [file 867289.f1.zip › 867289.f1/Table S14.xls]

## Sheet: Sheet1
Gene Table for Profile 5 (0.0,-1.0,1.0,1.0) Tumor
Num. Genes Expected	Num. Genes Assigned	P-Value	Significant
563	479.2	5.6e-05	(significant)
-------
Selected	Weight	Gene Symbol	SPOT	0h	4h	12h	24h
	1	ZSCAN5	ID_56	0	-0.91	0.39	0.09
	1	ACAD10	ID_81	0	-0.82	0.53	0.56
	1	MTERF	ID_99	0	-0.88	0.23	0.4
	1	SPATA17	ID_184	0	-0.02	2.97	2.82
	1	HDAC5	ID_228	0	0.17	1.37	1.02
	1	HINT3	ID_249	0	-0.75	1.4	1.97
	1	HINT2	ID_253	0	-0.3	0.61	0.97
	1	FRY	ID_332	0	-0.38	1.55	1.1
	1	MRAS /// LOC653764	ID_404	0	-0.74	0.63	0.09
	1	MON1B	ID_411	0	-1.08	-0.17	0.38
	1	FLJ25715	ID_423	0	-0.89	0.44	2.59
	1	FA2H	ID_453	0	0.24	2.27	1.49
	1	DKFZP434N062	ID_499	0	-0.81	1.77	0.52
	1	RP5-875H10.1	ID_544	0	-0.88	1.13	0.48
	1	ACBD3	ID_588	0	-0.09	0.78	0.94
	1	COPG2	ID_745	0	-0.72	0.76	1.21
	1	LOC642548 /// LOC653	ID_773	0	-1.07	0.41	1.3
	1	C14ORF37	ID_878	0	-1.37	1.74	2.51
	1	TTC30A	ID_929	0	-1.21	1.99	2.56
	1	TTC30B	ID_930	0	-1.59	0.95	1.25
	1	KIAA0974	ID_959	0	-0.24	0.9	1.35
	1	C14ORF21	ID_961	0	-1.01	0.98	0.14
	1	KLHL9	ID_993	0	-1.21	-0.24	0.22
	1	SLC30A9	ID_1034	0	-0.35	0.52	0.81
	1	MAFB	ID_1048	0	-0.79	0.89	1.01
	1	GSR	ID_1067	0	-0.16	0.83	0.99
	1	STYX /// LOC653890	ID_1162	0	-0.19	1.58	1.23
	1	LOC125150	ID_1169	0	-0.07	1.3	1.5
	1	HIST1H4H	ID_1371	0	-0.28	2.52	1.72
	1	LOC652900	ID_1422	0	-0.54	0.68	0.42
	1	ID4	ID_1457	0	-1	1.56	2.79
	1	EFHD1	ID_1546	0	-0.48	1.64	1.18
	1	TRAPPC6A	ID_1548	0	-0.55	1.49	2.7
	1	MBD5	ID_1557	0	-1.29	-0.05	0.35
	1	PREB	ID_1603	0	-0.2	0.96	1.26
	1	EFHA1	ID_1606	0	-0.29	0.46	1.13
	1	SLC22A17	ID_1614	0	-0.37	0.86	0.4
	1	RABGAP1L	ID_1654	0	-0.08	1.31	1.27
	1	DNMT2	ID_1683	0	-0.39	0.87	1.67
	1	RPIP8	ID_1818	0	-0.27	0.78	1.25
	1	LOC114984	ID_1823	0	-0.07	1.67	1.31
	1	C1ORF37 /// LOC65365	ID_1853	0	-0.09	0.93	1.15
	1	NIBP	ID_1913	0	-0.6	0.81	1.42
	1	MAGEF1	ID_1925	0	-0.7	0.29	0.45
	1	CCPG1	ID_1991	0	-0.32	0.11	0.69
	1	MGC13114	ID_2097	0	-0.61	0.4	0.29
	1	HHLA3	ID_2115	0	-1.54	1.05	2.58
	1	PFKFB2	ID_2120	0	-0.26	0.46	0.93
	1	SMYD3	ID_2138	0	-0.18	0.92	0.9
	1	RBM4B	ID_2178	0	-0.98	-0.03	0.93
	1	MCEE	ID_2179	0	-0.23	0.55	0.81
	1	RBM18	ID_2247	0	-0.52	1.11	1.35
	1	CLASP2	ID_2326	0	-0.36	0.7	0.66
	1	C20ORF80	ID_2327	0	-1.05	0.58	0.02
	1	CYB5D2	ID_2474	0	-1.35	1.23	1.85
	1	LOC400684	ID_2488	0	-0.48	0.54	0.92
	1	VPS4B	ID_2499	0	-0.24	0.33	0.86
	1	KIAA0672	ID_2545	0	-0.08	1.88	1.21
	1	GAMT	ID_2645	0	-0.24	0.65	0.84
	1	RAB4B /// LOC654335	ID_2681	0	-0.4	1.03	1.78
	1	PKM2	ID_2746	0	-0.28	0.26	0.93
	1	HIF1AN	ID_2939	0	-0.18	1.3	1.37
	1	MORC2	ID_2975	0	-0.22	0.86	0.5
	1	GBP2	ID_3063	0	-1.54	0.41	0.1
	1	RMND5B	ID_3108	0	-0.72	0.53	0.46
	1	MTIF3	ID_3199	0	-0.69	0.41	0.58
	1	PLTP	ID_3206	0	-0.76	0.32	0.16
	1	ROGDI	ID_3216	0	-0.71	1.78	1.79
	1	ZNF585A	ID_3217	0	-0.62	0.81	1.24
	1	NKAP	ID_3229	0	-0.34	0.44	0.8
	1	DAK	ID_3292	0	-1.39	0.31	0.48
	1	ASTN2	ID_3336	0	-0.58	1.61	1.74
	1	LOC400713	ID_3337	0	-1.02	0.57	0.54
	1	LIPT1	ID_3345	0	-2.08	-0.55	0.06
	1	TAF7	ID_3354	0	-1.1	-0.11	0.07
	1	DCN	ID_3424	0	-0.5	1.39	0.78
	1	TMOD1	ID_3563	0	-0.51	1.71	2.25
	1	CKB	ID_3571	0	-0.11	3.78	3.05
	1	ATP6V1E2	ID_3620	0	-0.44	1	1.36
	1	CALM3	ID_3622	0	-0.15	0.75	1.11
	1	CALB1	ID_3640	0	0.06	1.51	1.07
	1	ANKRD5	ID_3643	0	-0.34	2.66	1.57
	1	HOXA5	ID_3709	0	-0.59	0.52	0.09
	1	RNF11	ID_3715	0	-0.02	1.02	1.02
	1	RNF44	ID_3843	0	-0.48	0.57	0.61
	1	PMVK	ID_3922	0	-0.29	0.66	1.14
	1	TAF10	ID_3935	0	-0.22	0.48	0.83
	1	RP11-125A7.3	ID_3976	0	-0.27	0.14	0.76
	1	LOC651803	ID_4115	0	-0.56	1.61	1.23
	1	HES1	ID_4147	0	-0.71	0.43	0.12
	1	PNKP	ID_4148	0	-0.4	0.29	0.62
	1	NKRF	ID_4173	0	-0.62	0.2	0.44
	1	TPD52L1	ID_4178	0	-1.54	2.78	2.29
	1	DTL	ID_4283	0	-0.58	0.03	0.61
	1	SERHL2	ID_4297	0	-0.11	0.93	0.69
	1	EHHADH	ID_4410	0	-1.43	0.98	1.15
	1	C10ORF4	ID_4443	0	-0.65	0.73	1.54
	1	LOC440288	ID_4486	0	-0.28	1.3	1.71
	1	WDR31	ID_4517	0	-0.27	1.29	1.85
	1	WDR33	ID_4526	0	-0.85	0.29	0.35
	1	WDR41	ID_4544	0	-0.47	0.76	1.07
	1	FBF1	ID_4555	0	-1.05	-0.06	0.2
	1	WDR25	ID_4580	0	-0.96	0.9	0.72
	1	CRADD	ID_4597	0	-0.39	0.1	0.98
	1	GTF2E1	ID_4600	0	-0.6	0.48	0
	1	PNRC1	ID_4688	0	-0.25	0.52	1.11
	1	GTF2A1	ID_4715	0	-0.66	0.89	1.08
	1	C5ORF3	ID_4739	0	-0.49	0.95	1.22
	1	LOC400506	ID_4742	0	-0.94	0.24	0.7
	1	SMUG1	ID_4752	0	-0.4	0.65	0.96
	1	ZNRF2	ID_4789	0	-1.54	0.48	0.57
	1	LOC63920	ID_4795	0	-0.73	0.35	0.61
	1	POLK	ID_4800	0	-0.67	-0.14	0.38
	1	MTFMT	ID_4821	0	0.22	2	1.53
	1	LOC388327	ID_4899	0	-1.14	1.32	2.38
	1	CGNL1	ID_4942	0	-0.25	3.75	4.07
	1	FLJ46385	ID_5016	0	-0.9	1.08	0.23
	1	GLCCI1	ID_5134	0	-0.08	1.61	1.8
	1	EIF4A2	ID_5139	0	-0.55	0.05	0.5
	1	LYPLAL1	ID_5161	0	-0.21	0.68	0.84
	1	LOC348262	ID_5179	0	-0.24	0.86	0.42
	1	NCBP2	ID_5188	0	-0.57	0.37	0.76
	1	LOC653458	ID_5197	0	-0.71	0.42	0.63
	1	MMAA	ID_5284	0	-1.67	0.21	0.74
	1	PDZD6	ID_5285	0	-0.89	0.2	0.8
	1	FBXO36	ID_5305	0	-0.14	1.42	1.35
	1	DCTN4	ID_5429	0	-1.3	-0.32	0.09
	1	LENG1	ID_5447	0	-0.65	0.46	0.79
	1	SENP8	ID_5477	0	-0.74	2.08	2.27
	1	PTGES	ID_5491	0	-0.28	2.23	2.11
	1	ATP5S	ID_5493	0	-0.7	-0.07	0.67
	1	COX18	ID_5501	0	-0.82	0.46	0.76
	1	COX17	ID_5504	0	-0.42	0.51	0.86
	1	ZNF322B	ID_5564	0	-0.56	0.79	1.05
	1	MRPS33	ID_5576	0	-0.29	0.43	0.97
	1	COX5B	ID_5593	0	-0.25	0.31	0.81
	1	C8ORF55	ID_5618	0	-1.01	1.13	1.29
	1	MRPS28	ID_5661	0	-0.28	0.43	0.75
	1	APITD1	ID_5738	0	-0.57	0.49	0.64
	1	GNG7	ID_5807	0	-0.65	0	1.34
	1	C3ORF14	ID_5836	0	-0.39	0.8	1.36
	1	C3ORF26	ID_5856	0	-0.34	0.68	1.1
	1	C3ORF23	ID_5860	0	-0.82	0.18	0.48
	1	GPR85	ID_5874	0	-0.79	0.05	0.31
	1	NHEJ1	ID_5924	0	-1.56	0.19	0.15
	1	CAPN5	ID_5957	0	0.22	2.56	2.04
	1	NCAM1	ID_6019	0	-0.5	1.79	1.78
	1	CEND1	ID_6089	0	-0.36	1.05	0.7
	1	PRDX5	ID_6094	0	-0.22	0.43	0.88
	1	DKFZP779O175	ID_6100	0	-0.46	0.61	0.89
	1	PTHB1	ID_6120	0	-0.98	0.97	1.53
	1	OXSM	ID_6168	0	-0.45	0.89	0.93
	1	CTB-1048E9.5	ID_6194	0	-0.27	0.74	0.25
	1	C6ORF129	ID_6274	0	-0.28	0.49	0.81
	1	GMPR	ID_6313	0	-0.29	1.18	1.38
	1	BCAS4	ID_6353	0	0.21	1.69	1.24
	1	PSCD2	ID_6360	0	-0.99	-0.04	0.7
	1	PYGB	ID_6386	0	-0.55	0.61	0.48
	1	GSTM4	ID_6404	0	-0.46	2.47	2.58
	1	LOC317671	ID_6417	0	0.08	1.59	1.25
	1	EIF4E3	ID_6430	0	-1.35	0.45	0.52
	1	EIF4E2	ID_6453	0	-0.93	0.24	0.12
	1	C3ORF31	ID_6511	0	-0.74	0.94	0.87
	1	C3ORF60	ID_6531	0	-0.35	0.47	0.96
	1	GIYD2 /// GIYD1 ///	ID_6536	0	-0.16	1.06	0.81
	1	FAM50B	ID_6563	0	-0.63	0.32	1.28
	1	ACSBG1	ID_6674	0	-0.29	1.88	1.36
	1	GABPA /// GABPAP	ID_6784	0	-1.58	-0.14	0.57
	1	OSBPL10	ID_6785	0	-0.72	0.62	0.52
	1	LOC388610	ID_6798	0	-0.14	0.82	1.13
	1	ZNF559	ID_6800	0	-1.71	0.88	1.5
	1	ZNF558	ID_6801	0	-0.34	1.28	1.06
	1	ZNF565	ID_6816	0	-0.92	0.39	0.66
	1	C19ORF54	ID_6829	0	-1.53	-0.37	0.3
	1	PNPLA4	ID_6868	0	-0.51	0.78	1.2
	1	FGD4	ID_6901	0	0.06	2.04	1.22
	1	C17ORF48	ID_6909	0	-0.45	0.86	1
	1	C17ORF68	ID_6958	0	-0.84	1.09	1.69
	1	TMEPAI	ID_6976	0	-0.48	1.75	1.3
	1	NSUN3	ID_6995	0	-1.38	0.25	0.31
	1	C1ORF103	ID_7071	0	-1.97	0.58	0.8
	1	C1ORF102	ID_7072	0	-0.11	2.91	2.49
	1	C1ORF115	ID_7122	0	-0.68	1.65	2.08
	1	HVCN1	ID_7147	0	-0.39	0.69	0.57
	1	C1ORF142	ID_7175	0	-0.06	0.98	0.81
	1	KIAA0430	ID_7307	0	-0.59	0.74	0.99
	1	RANBP6	ID_7318	0	-0.58	0.47	0.39
	1	MGC39821	ID_7322	0	-0.33	0.38	1.12
	1	KIAA0427	ID_7330	0	-0.12	0.69	0.88
	1	FAM82B	ID_7340	0	-0.52	0.49	0.8
	1	KIAA0406	ID_7361	0	-0.6	0.21	0.58
	1	OXCT2	ID_7369	0	-0.34	1.07	0.94
	1	LOC162993	ID_7390	0	-1	0.4	0.33
	1	TIGD1	ID_7437	0	-0.85	-0.1	0.34
	1	ZNF610	ID_7467	0	-0.09	1.45	1.26
	1	ZNF19	ID_7524	0	-0.6	0.66	0.74
	1	ZNF18	ID_7528	0	-1.38	0.92	0.22
	1	ZNF677	ID_7545	0	-0.65	0.61	0.49
	1	KIAA1018	ID_7561	0	-0.36	0.44	0.75
	1	HIST1H2AG	ID_7588	0	-1.49	0.94	1.38
	1	HIST1H2AE	ID_7593	0	-0.72	0.77	2.51
	1	ZNF667	ID_7628	0	-1.69	0.43	0.26
	1	ZNF670	ID_7645	0	0	1.1	0.76
	1	RFK	ID_7685	0	-0.62	0.34	0.82
	1	BANP	ID_7746	0	-1.79	-0.14	0.2
	1	COX11 /// COX11P	ID_7762	0	-0.31	0.09	0.71
	1	SMPD1	ID_7794	0	-0.16	0.91	0.48
	1	SMPD3	ID_7796	0	-0.05	1.39	1.29
	1	FEZ1	ID_7798	0	-1.16	1.43	0.97
	1	C6ORF1	ID_7837	0	-0.24	0.66	0.84
	1	LCMT2	ID_7876	0	-1.6	0.76	0.64
	1	KIAA0329	ID_7993	0	-0.45	0.62	0.33
	1	LOC283152	ID_8005	0	-0.08	1.97	1.36
	1	TRAM1L1	ID_8013	0	-0.67	0.96	1.64
	1	HPS5	ID_8048	0	-0.08	1.1	1.1
	1	ZNF720	ID_8065	0	-0.59	0.9	1.3
	1	FAM70B	ID_8124	0	-0.22	0.62	1.04
	1	JUP	ID_8165	0	-0.51	1.63	1.35
	1	LOC389203	ID_8262	0	-1.09	0.2	0.6
	1	DUSP3	ID_8358	0	-0.72	0.22	0.33
	1	IL15	ID_8387	0	-0.79	0.19	0.88
	1	ZNF302	ID_8395	0	-1.97	-0.21	0.47
	1	TRAF3IP3	ID_8491	0	-0.2	1.62	1.81
	1	MGC52110	ID_8504	0	-0.35	0.15	0.87
	1	SLC45A1	ID_8505	0	-0.12	2.11	1.67
	1	THADA	ID_8512	0	-0.75	0.22	0.3
	1	RNF123	ID_8544	0	-0.42	0.03	0.6
	1	DKFZP779L1068	ID_8560	0	-0.92	-0.02	0.73
	1	AASDH	ID_8711	0	-0.71	0.66	0.64
	1	THAP5	ID_8738	0	-1.01	0.41	0.56
	1	THAP1	ID_8758	0	-1.49	-0.31	0.1
	1	LOC115098	ID_8790	0	-0.21	0.53	1.06
	1	FGFR4	ID_8818	0	-0.02	0.99	1.05
	1	FGFR3	ID_8819	0	-0.48	2.66	1.51
	1	RIOK1	ID_8827	0	-0.79	0.2	0.48
	1	TRAPPC2 /// SEDLP	ID_8834	0	-0.4	0.49	0.78
	1	PUS3	ID_8965	0	0.05	1.91	1.69
	1	FBXL16	ID_9038	0	0.06	1.63	1.03
	1	ZNF473	ID_9101	0	-0.5	0.34	0.78
	1	KIAA1648	ID_9114	0	-0.75	0.03	1.25
	1	SESN1	ID_9188	0	-0.05	1.65	1.15
	1	SESN3	ID_9192	0	0.1	4.26	4.01
	1	ZCSL3	ID_9224	0	-0.36	0.73	0.52
	1	ZCSL2	ID_9225	0	-0.17	0.68	0.86
	1	ZNF404	ID_9228	0	0.02	2.02	1.94
	1	CDK9	ID_9251	0	-0.69	0.4	0.35
	1	MGC2752	ID_9314	0	-0.86	0.67	0.18
	1	CXORF12	ID_9369	0	-0.38	1.01	0.96
	1	CDON	ID_9463	0	0.04	3.05	2.44
	1	C3ORF1	ID_9502	0	-0.24	0.45	1.02
	1	OSGEPL1	ID_9567	0	-0.71	0.61	1.15
	1	DET1	ID_9607	0	-1.95	-0.17	0.28
	1	TMEM141	ID_9615	0	-0.44	0.8	1.27
	1	ZNF101	ID_9635	0	-0.15	0.99	0.68
	1	KIAA1530	ID_9642	0	-0.3	2.29	2.76
	1	TMEM134	ID_9647	0	-0.46	0.5	0.59
	1	TMEM135	ID_9649	0	-0.33	1.14	1.62
	1	LOC128439	ID_9658	0	-0.3	0.22	0.86
	1	CHCHD3	ID_9673	0	-0.24	0.59	0.79
	1	ZCRB1	ID_9674	0	-0.11	0.7	0.96
	1	TMEM116	ID_9710	0	-0.67	0.11	1.08
	1	ZNF114	ID_9720	0	-0.92	0.01	1.14
	1	ZNF117	ID_9724	0	-0.41	0.65	0.33
	1	ZNF143	ID_9764	0	-0.53	0.58	0.89
	1	MGC2408	ID_9833	0	-1.68	1.22	0.15
	1	MGA	ID_9840	0	-0.71	0.38	0.68
	1	MCC	ID_9929	0	-0.5	1.42	1.01
	1	LOC25845	ID_10007	0	-1.42	0.08	1.8
	1	NIPSNAP1	ID_10069	0	-0.06	0.96	1.05
	1	RAB5C	ID_10083	0	-0.1	0.79	1
	1	TTLL1	ID_10092	0	-1.2	2.45	1.42
	1	CAP1	ID_10104	0	-0.11	0.63	0.9
	1	RAB4B	ID_10113	0	-1.92	0.79	0.57
	1	RHBDD1	ID_10115	0	-0.43	0.49	0.95
	1	C7ORF13	ID_10179	0	-1.24	0.91	0.95
	1	ZNF182	ID_10212	0	-0.96	-0.08	0.05
	1	TMEM99	ID_10219	0	-0.68	0.22	1.59
	1	MVD	ID_10267	0	-1.13	0.4	0.56
	1	GLO1	ID_10282	0	-0.17	0.58	0.86
	1	TMEM56	ID_10328	0	-0.41	1.61	1.9
	1	TMEM42	ID_10372	0	-0.53	-0.09	0.48
	1	MPI	ID_10419	0	-1.03	0.56	0.59
	1	SRBD1	ID_10433	0	-0.4	-0.01	0.65
	1	ZNF252	ID_10452	0	-0.37	0.83	0.84
	1	LQK1	ID_10492	0	-0.6	1.46	1.54
	1	ZNF232	ID_10495	0	-0.7	-0.06	0.5
	1	ZNF228	ID_10503	0	-0.55	0.11	0.47
	1	ZNF215	ID_10521	0	-1.12	0.05	0.19
	1	ZNF285	ID_10575	0	-0.59	1.32	2.29
	1	ZNF287	ID_10578	0	-0.39	1.02	0.48
	1	ZNF274	ID_10597	0	-1.18	0.19	0.3
	1	DGKI	ID_10645	0	-0.84	1.14	2.1
	1	STX8	ID_10717	0	-0.35	0.49	0.87
	1	HEMK2	ID_10784	0	-0.92	0.82	0.67
	1	ADAT1	ID_10819	0	-0.49	0.33	0.75
	1	KCNMB4	ID_10886	0	-0.1	1.48	0.97
	1	BC036928	ID_10953	0	-0.56	0.64	0.9
	1	C14ORF122	ID_11001	0	-0.6	0.54	0.71
	1	C14ORF126	ID_11004	0	-0.86	0.2	0.18
	1	C14ORF128	ID_11008	0	-1.05	0.27	0.72
	1	CHMP2A	ID_11045	0	-0.41	0.24	1.08
	1	C20ORF172	ID_11062	0	-0.68	0.35	0.23
	1	FLJ37453	ID_11133	0	-1.72	0.23	1.54
	1	HIGD1A	ID_11185	0	-0.19	0.51	0.84
	1	LPHN1	ID_11189	0	-0.47	0.97	0.88
	1	MGC12965	ID_11225	0	-0.65	1.83	1.7
	1	CSTF2T	ID_11306	0	-0.56	0.44	0.97
	1	ISYNA1	ID_11328	0	-0.57	0.59	0.63
	1	HDHD1A	ID_11342	0	-1.05	0.03	0.28
	1	JMJD1A	ID_11380	0	-0.48	0.51	1.01
	1	C10ORF89	ID_11456	0	-1.34	-0.2	0.37
	1	C10ORF54	ID_11515	0	-0.18	2.08	2.03
	1	BET1	ID_11537	0	-0.48	0.75	1.07
	1	SLC25A20	ID_11602	0	-0.47	0.58	0.4
	1	MST101	ID_11650	0	-0.2	1.16	0.94
	1	SLC25A17	ID_11701	0	-0.35	0.47	0.66
	1	XRCC6BP1	ID_11726	0	-0.03	1.71	1.68
	1	DHPS	ID_11746	0	-0.34	0.42	0.94
	1	STAMBP	ID_11766	0	-0.34	0.65	0.82
	1	DDAH2	ID_11790	0	-0.22	1.38	1.81
	1	AP3S2	ID_11849	0	-0.3	0.42	1.04
	1	LOC644799 /// LOC647	ID_11854	0	-0.57	0.12	0.83
	1	LOC92482	ID_11920	0	-0.45	0.09	0.68
	1	ATG4D	ID_11993	0	-0.24	0.81	0.38
	1	PPM1K	ID_11999	0	-0.01	1.32	1.18
	1	PPM1H	ID_12003	0	-0.94	0.84	0.23
	1	SLA/LP	ID_12071	0	-0.8	0.71	1.18
	1	NUDT18	ID_12076	0	-0.48	0.99	0.69
	1	NUDT12	ID_12078	0	-0.78	1.14	1.46
	1	FAM122A	ID_12101	0	-0.73	0.52	0.31
	1	MGC33648	ID_12111	0	-0.54	0.18	1.06
	1	NIF3L1	ID_12133	0	-0.94	0.08	0.3
	1	TPRKB	ID_12190	0	-0.21	0.51	0.96
	1	PAOX	ID_12194	0	0.01	2	1.68
	1	PHOSPHO2	ID_12231	0	-0.3	0.46	0.82
	1	SECISBP2	ID_12245	0	-0.51	-0.03	0.69
	1	NUDT22	ID_12340	0	-0.45	0.2	0.7
	1	ELF1	ID_12414	0	-1	0.47	0.62
	1	SPAG16	ID_12426	0	-0.72	0.15	0.8
	1	TMCO6	ID_12442	0	-0.64	0.32	0.96
	1	STMN2	ID_12535	0	-0.68	0.8	0.04
	1	NDUFAF1	ID_12593	0	-0.27	0.92	0.74
	1	EEFSEC	ID_12666	0	-0.07	1.66	1.51
	1	KLF7	ID_12682	0	-1.13	0.39	1.62
	1	KLF2	ID_12693	0	-0.55	1.69	2.83
	1	ATG10	ID_12733	0	-0.83	0.1	0.52
	1	DKFZP547C195	ID_12804	0	-0.85	-0.05	0.23
	1	IRAK4	ID_12823	0	-0.62	0.58	0.25
	1	LOC124446	ID_12838	0	-0.34	0.54	0.84
	1	KLHL12	ID_12897	0	-1.09	0.47	0.74
	1	LACTB2	ID_12989	0	-0.3	0.57	1.16
	1	TTC33	ID_13040	0	-0.43	0.1	0.62
	1	HIST2H2BE	ID_13061	0	-0.17	1.39	1.36
	1	PRNPIP	ID_13108	0	-0.21	0.88	1.43
	1	2014-03-02	ID_13123	0	-0.5	1.93	2.51
	1	ZBTB5	ID_13128	0	-0.33	0.69	1.23
	1	JAG2	ID_13144	0	-0.67	0.49	0.35
	1	HDAC11	ID_13182	0	-0.08	2.18	2.08
	1	FLJ30594	ID_13194	0	-0.46	0.7	0.35
	1	CDK2AP2	ID_13260	0	0.06	1.07	0.9
	1	FAM104B	ID_13323	0	-0.41	0.18	0.75
	1	TMCC2	ID_13348	0	-0.15	1.85	1.47
	1	NXT2	ID_13397	0	-0.48	0.95	1.64
	1	DDIT4L	ID_13405	0	-0.12	1.67	1.14
	1	KCNS3	ID_13476	0	-1.69	1.21	0.74
	1	ELP4	ID_13528	0	-0.22	1.1	0.82
	1	PCGF1	ID_13533	0	-1.05	0.27	0.75
	1	RASGRP2	ID_13548	0	-0.43	0.81	1
	1	SETD4	ID_13586	0	-1.1	0.45	0.89
	1	ASCC1	ID_13593	0	-0.34	0.53	1.02
	1	FLJ21839	ID_13599	0	-0.4	0.16	0.7
	1	DIRAS3	ID_13603	0	-0.64	1.61	2.11
	1	ASCC2	ID_13613	0	-0.27	0.89	1.46
	1	ROR1	ID_13617	0	-0.58	-0.13	0.46
	1	KBTBD7	ID_13635	0	-1.42	0.83	1.1
	1	SPOP	ID_13641	0	-0.92	0.11	0.47
	1	MMP10	ID_13697	0	-0.58	0.92	0.6
	1	CRIPAK	ID_13727	0	-0.51	1.85	2.33
	1	PHF12	ID_13730	0	-0.5	0.6	0.65
	1	MYO1D	ID_13795	0	-0.86	0.98	0.18
	1	MYO1F	ID_13800	0	-0.78	0.51	0.35
	1	RTN4IP1	ID_13816	0	-0.42	0.38	0.79
	1	TTK	ID_13973	0	-0.88	0.02	0.18
	1	LOH12CR1	ID_14011	0	-0.05	1.52	1.46
	1	RPA3	ID_14083	0	-0.27	0.51	1.04
	1	ERCC2	ID_14103	0	-0.59	0.46	0.25
	1	FLJ27352	ID_14132	0	-1.15	0.15	1.31
	1	C9ORF46	ID_14141	0	-0.28	1.04	1.13
	1	LOC339290	ID_14190	0	-1.27	0.81	1.24
	1	TBC1D7	ID_14268	0	-0.07	2.28	2.55
	1	DNM3	ID_14272	0	-1.68	1.17	1.15
	1	LOC339229	ID_14373	0	-0.75	0.02	0.39
	1	FLJ37953	ID_14408	0	-0.47	0.54	0.1
	1	CRELD1	ID_14457	0	-0.27	1.12	1.04
	1	AGGF1	ID_14475	0	-0.73	0.21	0.3
	1	SNAPC3	ID_14516	0	-0.31	0.32	0.72
	1	FLJ35779	ID_14532	0	-0.38	0.52	0.77
	1	GPRIN1	ID_14564	0	0.28	2.13	1.53
	1	C9ORF130	ID_14626	0	-0.77	0.58	1.18
	1	FPGT	ID_14659	0	-0.49	1.1	1.42
	1	C9ORF82	ID_14715	0	-0.18	0.86	0.79
	1	ALDH7A1	ID_14719	0	-0.22	0.47	0.98
	1	CRSP9	ID_14761	0	-0.94	0.1	0.24
	1	SP4	ID_14787	0	-0.36	1.08	1.09
	1	LIG4	ID_14825	0	-0.61	0.02	0.46
	1	PAFAH2	ID_14945	0	-1.15	0.03	0.64
	1	TASP1	ID_14950	0	-0.26	0.89	1.53
	1	LIAS	ID_14953	0	-0.7	0.14	1.14
	1	PRPF4	ID_14990	0	-0.1	0.95	0.92
	1	ZBTB41	ID_15073	0	-0.33	0.54	0.73
	1	C4ORF20	ID_15138	0	-0.29	0.83	1.12
	1	ZBTB11	ID_15160	0	-0.33	0.58	0.81
	1	CETN3	ID_15162	0	-0.86	0.65	0.78
	1	ACTR3B /// LOC648792	ID_15233	0	-0.5	0.46	0.57
	1	ATBF1	ID_15241	0	-0.14	1.48	1.71
	1	C6ORF64	ID_15323	0	-1.47	0.18	0.62
	1	CCDC34	ID_15331	0	-0.27	0.91	0.47
	1	C11ORF1	ID_15395	0	-0.43	0.22	0.79
	1	FLJ32549	ID_15547	0	-0.71	1.42	1.22
	1	CHAC2	ID_15584	0	-0.4	0.77	0.84
	1	ZFYVE28	ID_15674	0	-0.16	1.34	1.18
	1	CCDC113	ID_15732	0	-0.26	2.39	2.48
	1	BOLA1	ID_15737	0	-0.78	0.31	1.68
	1	RKHD3	ID_15740	0	-0.42	0.69	0.75
	1	MRPL40	ID_15741	0	-0.29	0.51	1.01
	1	MRPL10	ID_15849	0	-0.48	0.87	1.22
	1	MRPL30	ID_15870	0	-0.61	-0.11	0.66
	1	STK3	ID_15908	0	0.13	1.32	0.87
	1	TPPP	ID_15989	0	-0.3	3.31	3.09
	1	DUSP19	ID_16068	0	-0.36	1.05	0.97
	1	DUSP16	ID_16073	0	-0.39	0.5	1.12
	1	ALDH4A1	ID_16075	0	-0.7	0.57	0.82
	1	ZNF2	ID_16190	0	-0.22	0.5	0.94
	1	E2F6	ID_16227	0	-0.9	0.25	0.62
	1	SDC2	ID_16236	0	-0.46	1.44	1.02
	1	ZFPM1	ID_16261	0	-0.61	0.58	0.72
	1	ZFP90	ID_16296	0	-0.1	1.37	1.44
	1	ZFP95	ID_16362	0	-0.2	1.11	0.7
	1	LOC149448	ID_16402	0	-0.68	0.09	0.63
	1	COG6	ID_16418	0	-0.16	0.97	1.27
	1	DDX26B	ID_16435	0	-0.87	-0.1	0.17
	1	C2ORF42	ID_16485	0	-0.77	1.1	1.21
	1	C2ORF43	ID_16488	0	-0.91	-0.13	0.18
	1	CCNDBP1	ID_16496	0	-0.15	0.81	0.96
	1	COQ3	ID_16533	0	-0.44	0.43	0.89
	1	C16ORF51	ID_16541	0	-1.01	-0.14	0.41
	1	C2ORF13	ID_16587	0	-0.12	1.18	1.5
	1	SH3BGR	ID_16631	0	-1.14	1.95	2.04
	1	MIPOL1	ID_16657	0	-0.46	1.26	0.87
	1	TNKS	ID_16676	0	-0.46	0.61	1.21
	1	BBS10	ID_16720	0	-0.29	0.28	0.76
	1	RPS6KB2	ID_16790	0	-0.23	0.79	0.78
	1	SIPA1	ID_16818	0	-0.32	0.69	0.63
	1	PIN4	ID_16952	0	-0.15	0.76	1.08
	1	OBFC1	ID_17028	0	-0.2	1.19	1.07
	1	ANAPC10	ID_17057	0	-0.82	0.07	0.21
	1	PXMP3	ID_17080	0	-0.83	0.38	0.65
	1	PXMP4	ID_17082	0	-0.28	0.94	1.48
	1	PIGX	ID_17097	0	0.06	1.12	0.87
	1	PPP2R5A	ID_17141	0	-0.23	0.64	1.11
	1	PPP2R5D	ID_17142	0	0.01	1.12	0.83
	1	C1ORF74	ID_17149	0	-0.08	1.18	1.26
	1	C1ORF57	ID_17196	0	-0.53	0.64	0.64
	1	C1ORF67	ID_17233	0	-0.56	0.54	0.95
	1	BTBD10	ID_17244	0	-0.33	0.39	0.68
	1	BTBD12	ID_17247	0	-0.43	0.58	0.27
	1	ETFB	ID_17319	0	-0.23	0.62	1.07
	1	C1ORF97	ID_17320	0	-0.33	1.51	2.16
	1	ETFA	ID_17321	0	-0.11	0.83	1.05
	1	LSMD1	ID_17338	0	-0.3	0.38	0.91
	1	TUBG1	ID_17346	0	-0.29	0.51	0.76
	1	C1ORF25	ID_17439	0	-0.8	0.66	1.09
	1	LOC153364	ID_17440	0	-0.48	0.19	0.75
	1	C1ORF26	ID_17441	0	-0.18	0.91	1.19
	1	SCRN3	ID_17448	0	-0.21	0.91	0.95
	1	COL5A3	ID_17454	0	-0.78	0.62	0.27
	1	SRD5A2L	ID_17463	0	-0.88	0.24	0.9
	1	DYNC2LI1	ID_17475	0	-0.55	0.69	1.25
	1	PARP11	ID_17487	0	-1.53	0.23	0.62
	1	PARP16	ID_17491	0	-0.49	0.19	1.23
	1	ACTR3B	ID_17624	0	-0.91	0.69	0.18
	1	TTC4 /// C1ORF175	ID_17741	0	-0.89	0.29	0.03
	1	FLJ22028	ID_17754	0	-0.47	0.02	0.64
	1	LOC648768	ID_17803	0	-0.96	1.48	1.53
	1	HSD17B4	ID_17815	0	-0.34	0.7	0.98
	1	HSD17B8	ID_17820	0	-0.54	0.57	1.15
	1	SGTB	ID_17827	0	-0.08	1.05	0.74
	1	TADA3L	ID_17832	0	-0.37	0.67	0.65
	1	TNFAIP3	ID_17872	0	-0.57	0.25	1.13
	1	NDUFV3	ID_17899	0	-0.1	0.91	0.59
	1	ZFP28	ID_17937	0	-0.67	0.76	1.02
	1	SULT1A3 /// GIYD2 //	ID_18060	0	-0.18	1.15	0.77
	1	C12ORF48	ID_18121	0	-0.39	0.34	0.7
	1	ANKRD37	ID_18128	0	-0.68	1.45	1.89
	1	KRTAP2-1	ID_18191	0	-3.36	-0.13	0.5
	1	AMZ2	ID_18199	0	-0.17	0.57	0.95
	1	NDRG3	ID_18209	0	-0.23	0.93	0.77
	1	CPT2	ID_18223	0	-0.67	1.24	1.42
	1	NDUFA7	ID_18268	0	-0.34	0.25	1
	1	NTHL1	ID_18333	0	-0.25	0.55	0.94
	1	TRIM24	ID_18452	0	0.06	1.2	0.93
	1	LRRC49	ID_18455	0	-0.47	1.36	2.13
	1	CBWD1 /// CBWD2 ///	ID_18522	0	-0.16	0.86	0.8
	1	BAD	ID_18593	0	-0.14	1	0.61
	1	WIRE	ID_18595	0	0.15	1.76	1.34
	1	ALKBH2	ID_18598	0	-0.43	1.04	1.18
	1	CDC37L1	ID_18643	0	-0.74	1.13	0.61
	1	CRIP1	ID_18647	0	-0.2	1.52	1.72
	1	ARRDC3	ID_18672	0	-0.33	0.85	1.1
	1	BCKDHA	ID_18698	0	-0.35	0.5	0.96
	1	TRIM45	ID_18725	0	-1.1	0.7	0.75
	1	TRIM68	ID_18785	0	-0.97	0.42	0.14
	1	TRIM69	ID_18788	0	-0.8	0.91	1.16
	1	C21ORF33	ID_18811	0	-0.48	0.35	0.59
	1	PDCD6	ID_18834	0	0.06	1.01	0.83
	1	SLC9A3	ID_18935	0	-1.08	0.43	0.15
	1	CDC42EP5	ID_18993	0	-0.89	0.7	0.06
	1	C21ORF55	ID_19105	0	-0.42	1.8	1.9
	1	CENTA1	ID_19122	0	-0.88	0.2	0.04
	1	HMGCL	ID_19159	0	-0.57	1.01	1.21
	1	EPB41	ID_19195	0	-0.04	1.48	1.28
	1	CRAT	ID_19200	0	-0.12	1.15	0.7
	1	NCOA1	ID_19252	0	-0.58	0.66	0.14
	1	HSDL1	ID_19285	0	-0.06	2.02	2.02
	1	POLR2H	ID_19369	0	-0.17	0.78	1.02
	1	ETFDH	ID_19387	0	-0.19	1.75	2.28
	1	TJP3	ID_19422	0	-0.4	1.93	1.62
	1	RNF187 /// LOC644942	ID_19474	0	-0.28	1.32	1.71
	1	LOC90784	ID_19523	0	-0.08	1.5	1.11
	1	PIK3CB	ID_19565	0	-0.23	0.78	0.88
	1	MLYCD	ID_19603	0	-0.17	2.34	1.5
	1	MAP1LC3A	ID_19617	0	-0.8	0.38	1.32
	1	BPHL	ID_19677	0	-1.38	1.08	1.44
	1	STYXL1	ID_19715	0	-0.22	0.76	1.23
	1	STAM2	ID_19723	0	-0.2	0.74	0.97
	1	LOC91893	ID_19741	0	-0.82	-0.07	1.67
	1	DNAJB2	ID_19760	0	-0.26	0.74	1.11
	1	HBA1 /// HBA2	ID_19787	0	-0.63	0.76	2.3
	1	LRCH4	ID_19843	0	-0.28	1.17	0.63
	1	FANCF	ID_19872	0	-0.79	0.67	1.23
	1	FANCB	ID_19875	0	-0.13	1.13	1.18
	1	PRKACA	ID_19908	0	-0.02	1.64	1.63
	1	FANK1	ID_19935	0	-0.03	1.91	1.25
	1	YRDC	ID_19951	0	-0.78	0.3	0.91
	1	LOC51334	ID_19993	0	0.02	1.44	0.94
	1	FAM51A1	ID_19998	0	-0.5	0.81	1.02
	1	FLJ11506	ID_20022	0	-0.22	0.84	0.95
	1	DKFZP686E2433	ID_20069	0	-0.45	1.33	1.92
	1	CABYR	ID_20113	0	-0.54	0.28	0.98
	1	TATDN3	ID_20151	0	-0.71	0.71	0.81
	1	GDPD5	ID_20252	0	-0.22	1.56	2.03
	1	CDC25C	ID_20256	0	-0.21	0.91	0.9
	1	C11ORF30	ID_20296	0	-0.87	-0.2	0.28
	1	C16ORF5	ID_20341	0	-0.37	0.79	0.43
	1	STAT4	ID_20410	0	0.05	2.93	1.83
	1	THRA	ID_20450	0	-0.54	0.73	0.22
	1	NANP	ID_20462	0	-0.32	0.74	0.48
	1	FLJ20125	ID_20490	0	-1.79	0.01	0.4
	1	C11ORF77	ID_20538	0	-0.26	1.01	0.51
	1	NRXN2	ID_20553	0	-0.3	1.58	1.98
	1	CTSH	ID_20577	0	-0.69	0.3	0.54
	1	C11ORF74	ID_20578	0	-0.42	0.45	0.99
	1	DHRS10	ID_20597	0	-0.46	0.7	0.28
