# Supplementary material for: Systematic Analysis of Time-Series Gene Expression Data on Tumor Cell-Selective Apoptotic Responses to HDAC Inhibitors
Source: Comput Math Methods Med. 2014 Oct 13;2014:867289. doi: 10.1155/2014/867289 (PMC4211306; doi:10.1155/2014/867289)
Supplement: Supplementary file 1 — Table S1. H-score of all pathways for tumor and normal samples: This table lists the name, category, website and H-score values for all 1307 pathway. Table S2. Illustrative pathways belonging to term "No responding": This table lists the name, category, website and TVPC patterns for "No responding" pathways. Table S3. Illustrative pathways belonging to term "Consistent responding": This table lists the name, category, website and TVPC patterns for "Consistent responding" pathways. Table S4. Illustrative pathways belonging to term "Tumor specific responding": This table lists the name, category, website and TVPC patterns for "Tumor specific responding" pathways. Table S5. Illustrative pathways belonging to term "Normal specific responding": This table lists the name, category, web site and TVPC patterns for "Normal specific responding" pathways. Table S6. Illustrative pathways belonging to term "Divergent responding": This table lists the name, category, website and TVPC patterns for "Divergent responding" pathways. Table S7. Genes within profile #0 for normal samples: This table contains all genes within profile #0 for normal samples, and lists the normalized expression data to the right of gene symbol. Table S8. Genes within profile #2 for normal samples: This table contains all genes within profile #2 for normal samples, and lists the normalized expression data to the right of gene symbol. Table S9. Genes within profile #9 for normal samples: This table contains all genes within profile #9 for normal samples, and lists the normalized expression data to the right of gene symbol. Table S10. Genes within profile #12 for normal samples: This table contains all genes within profile # 12 for normal samples, and lists the normalized expression data to the right of gene symbol. Table S11. Genes within profile #14 for normal samples: This table contains all genes within profile #14 for normal samples, and lists the normalized expression data to the right of gene symbol. Ta [file 867289.f1.zip › 867289.f1/Table S15.xls]

## Sheet: Sheet1
Gene Table for Profile 12 (0.0,1.0,2.0,3.0) Tumor
Num. Genes Expected	Num. Genes Assigned	P-Value	Significant
1508	465.2	0	(significant)
-------
Selected	Weight	Gene Symbol	SPOT	0h	4h	12h	24h
	1	SNORA78	ID_27	0	0.37	1.92	3.46
	1	GEM	ID_32	0	1.24	1.16	1.97
	1	ACACB	ID_62	0	0.33	1.05	0.9
	1	ZSCAN2	ID_64	0	0.58	1.16	1.58
	1	PARS2	ID_137	0	1.13	2.31	2.35
	1	C20ORF3	ID_146	0	0.39	0.59	1.25
	1	IL11RA	ID_178	0	0.52	0.83	1.34
	1	NEU1	ID_185	0	1.32	2.2	2.72
	1	HDAC3	ID_232	0	0.92	1.63	1.72
	1	ATF3	ID_235	0	1.62	1.33	3.34
	1	HDAC1	ID_238	0	0.24	1.01	0.99
	1	ALS2CR13	ID_257	0	1.39	3.36	3.77
	1	GAN	ID_269	0	0.52	1.48	1.58
	1	MAPRE2	ID_277	0	1.39	2.55	2.72
	1	GCK	ID_302	0	0.03	0.86	1.12
	1	GCA	ID_310	0	2.68	5.27	5.46
	1	NELL2	ID_318	0	0.18	-0.1	1.34
	1	NEK9	ID_336	0	0.23	0.75	1.3
	1	MDH2	ID_341	0	-0.09	0.69	1.13
	1	VRK3	ID_359	0	0.38	1.61	1.68
	1	FTS	ID_368	0	1.02	1.65	1.79
	1	FTO	ID_374	0	0	0.5	1.24
	1	DKFZP434N035	ID_406	0	0.15	2.29	2.34
	1	TEX9	ID_428	0	1.71	2.77	3.57
	1	SEC11L3	ID_429	0	0.31	1.33	1.69
	1	BLVRA	ID_430	0	0.65	1.73	1.79
	1	BLVRB	ID_438	0	1.01	2.74	3.35
	1	LOC647263	ID_441	0	1.64	2.25	4.25
	1	DCAMKL1	ID_455	0	0.04	0.37	4.33
	1	RALBP1	ID_529	0	0.01	1.14	1.27
	1	MDM1	ID_537	0	0.72	1.29	1.36
	1	TEPP	ID_545	0	0.33	0.09	1.41
	1	ACADSB	ID_614	0	0.89	2.61	3.69
	1	FAM108A1	ID_632	0	0.85	1.93	2.13
	1	MAP2	ID_641	0	2.85	6.08	6.29
	1	MAP9	ID_647	0	0.42	1.63	1.92
	1	MAPT	ID_661	0	0.28	1.25	2.36
	1	SDHAL1	ID_662	0	0.33	0.95	1.06
	1	ADCK5	ID_667	0	-0.2	0.83	1.57
	1	HN1	ID_678	0	0.97	2.26	2.04
	1	SLC4A8	ID_708	0	-0.02	1.37	1.87
	1	SRXN1	ID_747	0	0.7	1.31	2.12
	1	JUND	ID_752	0	0.65	0.96	2.26
	1	PIP5K1C	ID_770	0	0.32	1.99	2.01
	1	PIP5K2C	ID_792	0	0.28	1.08	1.2
	1	RTBDN	ID_853	0	0	0.24	2.21
	1	KIAA0953	ID_854	0	0.16	2.37	2.93
	1	DEPDC6	ID_862	0	-0.04	0.28	1.47
	1	C14ORF45	ID_875	0	1.19	3.32	3.55
	1	C14ORF79	ID_889	0	0.44	1.39	1.79
	1	HIP1R	ID_917	0	1.4	1.99	2.22
	1	COPS8	ID_923	0	0.24	1.11	1.27
	1	MECR	ID_947	0	0.3	0.68	1.08
	1	NFS1	ID_953	0	-0.16	0.62	1.25
	1	C14ORF24	ID_962	0	0.08	0.55	1.31
	1	KIAA0960	ID_967	0	1.58	2.15	3.41
	1	KLHL8	ID_987	0	0.15	1.02	1.28
	1	SLC4A5	ID_1000	0	0.89	0.87	2.19
	1	FLJ16641	ID_1007	0	-0.33	0.4	2.82
	1	IQCH	ID_1010	0	1.25	1.76	2.81
	1	IQCD	ID_1012	0	1.7	2.69	3.44
	1	IQCE	ID_1014	0	0.47	0.45	1.17
	1	MGC14425	ID_1022	0	0.69	1.15	1.9
	1	TMSL8	ID_1029	0	0.01	2.91	4.95
	1	GSN	ID_1070	0	1.25	1.79	2.31
	1	SH3GLB2	ID_1109	0	0.73	2.17	2.53
	1	ET	ID_1166	0	0.46	0.6	1.05
	1	ARL8B	ID_1177	0	0.31	0.79	1.28
	1	SLC2A3P1	ID_1210	0	0.24	0.79	1.02
	1	GK	ID_1222	0	0.84	0.92	1.22
	1	KCNAB2	ID_1225	0	0.33	0.84	1.58
	1	ARL5B	ID_1234	0	0.6	1.11	2.21
	1	HIST1H1C	ID_1248	0	0.56	2.02	2.71
	1	OSTM1	ID_1250	0	0.43	0.88	1.05
	1	ARL4A	ID_1260	0	0.74	1.74	1.65
	1	EXOC8	ID_1267	0	0.68	1.38	1.82
	1	EXOC3	ID_1283	0	0.14	1.09	1.02
	1	EXOC6	ID_1284	0	0.35	1.2	1.7
	1	CXX1	ID_1287	0	0.23	1.01	1.42
	1	NBEAL1	ID_1291	0	0.66	1.11	1.31
	1	KIAA1967	ID_1305	0	1.35	1.57	2.39
	1	CD302	ID_1309	0	-0.13	0.38	1.2
	1	LZTFL1	ID_1321	0	0.53	1.7	2.28
	1	ABCA7	ID_1339	0	0.25	0.95	1.26
	1	ABCA5	ID_1356	0	0.87	0.73	1.58
	1	JRKL	ID_1381	0	0.81	1.49	1.48
	1	NR4A2	ID_1382	0	2.75	3.76	4.2
	1	FREM2	ID_1397	0	0	0.56	1.02
	1	HIST1H3D	ID_1406	0	0.9	1.5	1.57
	1	HIST1H3H	ID_1410	0	0.49	2.01	3.47
	1	PC	ID_1412	0	0.38	1.13	1.21
	1	EHBP1L1	ID_1436	0	0.25	0.49	1.36
	1	LOC401504	ID_1442	0	0.31	0.9	1.1
	1	XK	ID_1489	0	0	0.73	1.76
	1	HS1BP3	ID_1518	0	0.48	1.3	1.91
	1	TCTA	ID_1534	0	-0.04	0.89	2.76
	1	TRAPPC6B	ID_1549	0	0.66	1.83	2.09
	1	MGC13017	ID_1550	0	0.22	0.9	1.37
	1	EFHC2	ID_1563	0	0.01	0.33	1.03
	1	EFHC1	ID_1566	0	0.81	1.11	1.86
	1	MGC13005	ID_1575	0	0.24	0.18	1.38
	1	PREP	ID_1580	0	0.03	1.14	1.42
	1	LOC202781	ID_1583	0	-0.13	0.18	1.68
	1	BIRC3	ID_1599	0	-0.59	0.44	2.71
	1	ARL15	ID_1634	0	1.64	2.79	2.86
	1	ARL14	ID_1636	0	0.02	1.01	5.71
	1	COMMD9	ID_1657	0	-0.06	0.67	0.96
	1	PRPH	ID_1689	0	-0.03	2.32	2.59
	1	C18ORF18	ID_1700	0	0.14	0.16	1.16
	1	IRGM	ID_1714	0	0	0	1.51
	1	ZADH1	ID_1728	0	0.49	0.55	2.14
	1	NGFR	ID_1732	0	1.94	2.28	3.78
	1	COMMD6	ID_1737	0	0.08	1.04	1.26
	1	SMA3 /// SMA5	ID_1742	0	0.63	0.71	1.4
	1	HRB	ID_1752	0	0.36	1.16	1.04
	1	IGFBP2	ID_1788	0	0.63	2.93	3.66
	1	HMGCS1	ID_1843	0	1	1.27	2.24
	1	DAAM1	ID_1845	0	2	2.95	3.15
	1	MAPBPIP	ID_1847	0	-0.04	0.83	1.24
	1	HADHB	ID_1855	0	0.08	1.36	1.56
	1	LOC255783	ID_1865	0	0.67	2.41	3.36
	1	PTENP1	ID_1888	0	0.09	0.28	1.04
	1	DFNB31	ID_1894	0	2.2	3.54	4.16
	1	CREG1	ID_1897	0	0.56	1.83	2.61
	1	PLEKHH1	ID_1904	0	0.73	3.4	3.89
	1	KIAA1815	ID_1914	0	-0.13	0.38	1.15
	1	CPT1B	ID_1927	0	0.59	1.49	2
	1	KIAA1826	ID_1931	0	0.44	0.95	1.17
	1	NID2	ID_1932	0	1.28	1.97	2.47
	1	UNC5B	ID_1953	0	0.39	4.13	3.59
	1	SMARCD2	ID_1954	0	0.34	1.68	1.37
	1	AKR7A2	ID_1963	0	0.18	1.21	1.56
	1	AKR7A3	ID_1964	0	0.39	0.88	1.35
	1	CYB5R4	ID_2020	0	0.38	1.52	1.92
	1	RAB3IP	ID_2027	0	1.54	2.66	2.73
	1	PCYOX1L	ID_2037	0	1.92	3.59	3.59
	1	ABLIM1	ID_2049	0	-0.12	0.72	1.63
	1	RNASE4	ID_2072	0	0.04	1.87	2.51
	1	POLR3GL	ID_2076	0	0.56	1.63	1.53
	1	GGA1	ID_2085	0	0.06	0.93	1.12
	1	LOC138255	ID_2094	0	0.16	3.56	3.36
	1	PITX2	ID_2104	0	1.11	2.1	2.11
	1	CDC34	ID_2122	0	0.43	1.47	1.55
	1	CDC37	ID_2124	0	0.41	1.26	1.39
	1	OSBPL8	ID_2133	0	0.72	1.57	1.64
	1	RNGTT	ID_2176	0	0.04	1.2	1.54
	1	HHIP	ID_2184	0	0.19	0.52	1.03
	1	CYB5A	ID_2194	0	0.17	1.31	1.6
	1	RBM11	ID_2283	0	-0.02	0.44	1.54
	1	PSMA5	ID_2297	0	0.27	1.01	0.84
	1	EPHX1	ID_2338	0	-0.14	0.43	0.97
	1	RAB33B	ID_2344	0	1.12	1.59	2.64
	1	C20ORF19	ID_2366	0	0.04	0.8	1.24
	1	PSPH	ID_2369	0	0.12	1.65	2.46
	1	BUD31	ID_2371	0	0.52	1.44	1.23
	1	C20ORF12	ID_2372	0	0.68	1.39	1.4
	1	ATP8B3	ID_2393	0	-0.09	0.33	1.29
	1	RAB39B	ID_2399	0	0.99	3.8	4.25
	1	C20ORF27	ID_2405	0	0.16	1.04	0.99
	1	PSME1	ID_2419	0	0.16	0.61	1.07
	1	BTG1	ID_2421	0	0.24	0.81	1.1
	1	NANOS1	ID_2436	0	1.45	3.44	3.83
	1	MGST3	ID_2462	0	0.3	1.21	1.81
	1	MARK4	ID_2514	0	0.46	2.26	1.9
	1	USP15	ID_2571	0	0.38	0.84	1
	1	NICN1	ID_2574	0	-0.31	0.28	1.31
	1	SKIV2L	ID_2611	0	0.01	0.74	1.36
	1	PKIG	ID_2666	0	0.55	0.79	1.14
	1	TDRKH	ID_2700	0	0.93	3.48	3.79
	1	HACE1	ID_2709	0	-0.11	0.93	1.59
	1	APEH	ID_2711	0	0.26	1.07	1.56
	1	CAT	ID_2725	0	0.05	1.28	1.34
	1	TBCE	ID_2732	0	0.05	0.73	1.23
	1	LOC400642	ID_2736	0	0.43	1.19	2.06
	1	TBCC	ID_2749	0	0.35	1.04	1.23
	1	CCK	ID_2759	0	-0.02	0.9	3.9
	1	FLJ10490	ID_2774	0	0.15	0.84	1.97
	1	CCS	ID_2776	0	0.78	2.11	1.94
	1	SNTA1	ID_2809	0	0.36	0.37	1.94
	1	PNMA2	ID_2814	0	0.51	1.16	2.27
	1	HIBADH	ID_2820	0	0.19	0.99	1.62
	1	MORG1	ID_2846	0	0.25	0.93	1.32
	1	PLD1	ID_2849	0	-0.16	1.01	1.54
	1	FBXL2	ID_2878	0	0.45	1.4	1.72
	1	FBXO8	ID_2896	0	-0.28	0.5	1.21
	1	FDXR	ID_2906	0	0.44	1.72	2.11
	1	VPS37A	ID_2929	0	0.44	1.35	1.52
	1	SEMA3F	ID_2945	0	0.21	1.34	1.12
	1	ATP6V0D1	ID_2954	0	0.34	1.58	1.86
	1	MAP3K15	ID_2980	0	0.51	1.32	1.71
	1	SEMA4F	ID_2982	0	0.23	0.97	1.26
	1	MAP3K14	ID_2988	0	1.51	1.4	2.47
	1	MAP3K13	ID_2989	0	0.7	1.23	1.86
	1	SEC15L2	ID_2993	0	1.25	1.62	2.33
	1	LOC253039	ID_2998	0	0.49	1.19	1.32
	1	DLGAP1	ID_3008	0	-0.26	0.23	3.46
	1	BIK	ID_3023	0	0.84	2	2.24
	1	NIT1	ID_3028	0	0.18	1.47	1.51
	1	BLM	ID_3065	0	0.38	0.98	1.22
	1	FLJ40125	ID_3074	0	0.07	0.28	1.66
	1	LOC257396	ID_3085	0	-0.15	1.42	1.97
	1	RP13-383K5.2	ID_3097	0	1.52	4.73	5.18
	1	LOC646150	ID_3099	0	0.16	1.38	3.27
	1	C2ORF7	ID_3104	0	0.53	2.03	2.19
	1	RMND5A	ID_3106	0	0.9	1.43	1.81
	1	UBN1	ID_3115	0	0.66	1.47	1.36
	1	LOC653890	ID_3127	0	0.33	1.45	1.13
	1	UBL7	ID_3136	0	0.41	1.74	2.55
	1	UBL5	ID_3147	0	0.15	1.07	1.64
	1	SYDE2	ID_3152	0	0.08	0.7	1.21
	1	STOML1	ID_3168	0	0.2	0.96	1.42
	1	PLS1	ID_3177	0	0.67	1.85	1.95
	1	CCNA1	ID_3178	0	0.03	3.01	5.36
	1	KIAA0562	ID_3181	0	0.56	1.78	1.61
	1	IL1R2	ID_3192	0	0.71	2.08	2.04
	1	PRO1073	ID_3195	0	1.31	1.96	2.97
	1	IL23A	ID_3201	0	0.32	0.08	1.53
	1	RABL2B /// RABL2A	ID_3230	0	0.46	1.89	2.19
	1	CCND3	ID_3251	0	0.7	1.67	1.66
	1	IFRG15	ID_3303	0	0.46	1	1.07
	1	HES6	ID_3324	0	1.82	4.43	4.52
	1	CCNG2	ID_3340	0	1.07	1.58	2.02
	1	AKAP8L	ID_3356	0	0.53	0.86	1.13
	1	ANKS1A	ID_3398	0	0.47	1.64	1.63
	1	TAC3	ID_3430	0	0.05	0.44	1.9
	1	COTL1	ID_3447	0	0.49	1.43	1.43
	1	MGC9913	ID_3454	0	-0.32	0.38	1.86
	1	FLJ23049	ID_3471	0	0.23	1.88	2.4
	1	IFT20	ID_3481	0	0.33	1.39	2.19
	1	PMCH	ID_3497	0	0.37	0.68	2.34
	1	TDRD7	ID_3513	0	0.78	1.84	1.69
	1	LOC646222	ID_3564	0	0	0.75	3
	1	TIMM17A	ID_3567	0	0.22	1.24	1.26
	1	ATP6V1G1	ID_3601	0	0.29	0.99	1.25
	1	SQSTM1	ID_3606	0	-0.01	0.28	1.69
	1	CHP	ID_3611	0	0.33	1.25	1.64
	1	IFT57	ID_3618	0	0.31	1.44	1.37
	1	ATP6V1E1	ID_3619	0	0.02	1.05	1.11
	1	IFT52	ID_3623	0	0.59	1.74	1.89
	1	CALM1	ID_3630	0	0.63	1.57	1.55
	1	ANKRD6	ID_3639	0	-0.02	1.97	2.17
	1	RNF32	ID_3656	0	1.46	2.13	3.66
	1	TBC1D22A	ID_3666	0	0.13	0.06	1.11
	1	CPD	ID_3681	0	0.48	0.76	1.11
	1	RNF20	ID_3686	0	-0.04	1.54	1.83
	1	CLU	ID_3691	0	0.44	1.59	2.57
	1	GALM	ID_3699	0	1.24	2.65	2.61
	1	LOC653761	ID_3738	0	0.14	2.41	2.48
	1	HABP4	ID_3746	0	1.55	2.05	2.28
	1	CTH	ID_3804	0	1.36	3.21	3.56
	1	CPM	ID_3813	0	1.31	3.11	3.23
	1	USP9X	ID_3816	0	0.17	0.93	1.17
	1	LOC554206	ID_3824	0	1.37	2.31	3.32
	1	PLAC1	ID_3834	0	-0.13	2.24	3.93
	1	MGC15634	ID_3854	0	0.04	0.1	1.37
	1	TAF4B	ID_3866	0	0.53	0.57	2.14
	1	MAPK9	ID_3879	0	0.19	1.2	0.98
	1	UNC13B	ID_3884	0	0.17	1.17	1.85
	1	ARG2	ID_3895	0	0.66	2.01	2.88
	1	EIF1B	ID_3930	0	0.4	0.94	1.02
	1	VPS8	ID_3931	0	0.63	1.6	2.11
	1	IFT122	ID_3977	0	-0.02	1.54	1.79
	1	TESK2	ID_3991	0	1.89	2.71	3.01
	1	SYAP1	ID_4007	0	0.45	1.53	1.88
	1	LOC388272	ID_4018	0	0.87	1.69	1.87
	1	LOC120379	ID_4052	0	1.84	1.76	3.23
	1	IFT80	ID_4056	0	0.58	1.46	1.89
	1	ARL6	ID_4058	0	1.05	2.57	2.55
	1	ARL3	ID_4061	0	0.04	1.2	1.35
	1	LTB4DH	ID_4065	0	-0.05	0.83	1.26
	1	IFT81	ID_4068	0	-0.29	-0.07	0.8
	1	IFT88	ID_4072	0	0.72	1.85	2.17
	1	FKBP7	ID_4076	0	1.21	2.52	2.39
	1	FKBP5	ID_4080	0	0.76	2.32	2.08
	1	FKBPL	ID_4102	0	0.44	1.27	1.51
	1	SOHLH2	ID_4125	0	0.34	1.33	1.58
	1	VPS13D	ID_4130	0	0.37	0.36	1.12
	1	ATRNL1	ID_4142	0	0	0.36	1.44
	1	HES4	ID_4153	0	1.35	2.5	2.97
	1	CLCN3	ID_4163	0	0.45	0.92	1
	1	DMD	ID_4169	0	1	3.07	2.84
	1	CR1 /// CR1L /// LOC	ID_4176	0	0.59	2.98	4.26
	1	UFD1L	ID_4222	0	0.32	1.2	1.25
	1	PPFIA1	ID_4238	0	0.4	1.42	1.17
	1	LOC643234	ID_4245	0	0.04	-0.07	1.46
	1	FYCO1	ID_4249	0	-0.03	0.85	1.58
	1	LOC344595	ID_4260	0	0.92	0.84	1.46
	1	GTDC1	ID_4340	0	0	0.69	1.35
	1	LOC440356	ID_4355	0	-0.1	0.53	2.41
	1	ADIPOR2	ID_4359	0	0.94	1.06	1.29
	1	ADIPOR1	ID_4361	0	-0.04	0.88	1.15
	1	KIAA0828	ID_4379	0	0.04	1.34	2.08
	1	HECA	ID_4380	0	0.93	1.44	2.19
	1	SCG2	ID_4390	0	0.87	2.61	2.82
	1	EVI5L	ID_4403	0	0.73	0.97	1.24
	1	NME5	ID_4449	0	1.03	3.57	3.7
	1	WDR5B	ID_4458	0	-0.15	1.44	2.05
	1	WDR52	ID_4466	0	2.12	2.74	3.61
	1	PRKXP1	ID_4470	0	0.84	1.1	2.28
	1	HCCA2	ID_4476	0	1.15	1.69	2.2
	1	WDR67	ID_4487	0	0.64	1.1	1.12
	1	WDR63	ID_4491	0	0.77	3.71	4.01
	1	WDR69	ID_4494	0	0.28	2.03	2.26
	1	WDR32	ID_4527	0	0.05	1.3	1.61
	1	SERTAD2	ID_4528	0	0.7	1.25	1.79
	1	WDR48	ID_4535	0	-0.12	0.47	0.93
	1	PCDHB10	ID_4554	0	-0.23	-0.02	0.9
	1	WDR17	ID_4560	0	0.15	1.47	1.94
	1	LOC400566	ID_4575	0	0.16	2	2.48
	1	WDR23	ID_4587	0	0.2	0.97	1.19
	1	GTF2E2	ID_4602	0	0.5	1.44	1.33
	1	DDX49	ID_4658	0	0.28	1.2	0.95
	1	GINS4	ID_4672	0	0.32	1.96	1.75
	1	LOC643011	ID_4676	0	0.04	0.71	2.51
	1	HDHD3	ID_4690	0	0.8	1.97	1.74
	1	EAF2	ID_4694	0	1.55	3.79	4.22
	1	GTF2A2	ID_4717	0	0.02	0.86	1.21
	1	SARS	ID_4732	0	0.11	0.96	1.53
	1	SYBL1	ID_4735	0	0.42	1.21	1.74
	1	ASNS	ID_4751	0	-0.31	0.58	2
	1	SEC22A	ID_4755	0	0.34	1.14	1.29
	1	MORN3	ID_4766	0	0.15	1.26	1.25
	1	MORN2	ID_4767	0	0.09	1.44	1.91
	1	GCAT	ID_4784	0	0.2	1	1.6
	1	HTRA2	ID_4790	0	0.24	1.24	1.56
	1	GCC2	ID_4811	0	0.64	1.03	1.19
	1	GCC1	ID_4812	0	0.49	1.47	1.25
	1	MAD2L2	ID_4818	0	0.43	2.02	2.12
	1	EMD	ID_4835	0	0.49	1.02	1.57
	1	GCDH	ID_4838	0	1.7	2.98	3.05
	1	FLJ14981	ID_4861	0	-0.32	2.09	3.09
	1	HTR7 /// HTR7P	ID_4864	0	0.01	0.14	1.8
	1	PLCL1	ID_4886	0	-0.05	1.37	2.66
	1	SPATA2	ID_4890	0	1.52	1.9	2.39
	1	SPATA4	ID_4893	0	0.12	1.3	3.35
	1	SPATA7	ID_4900	0	0.4	1.88	1.6
	1	PLCE1	ID_4934	0	0.77	0.53	1.46
	1	GCLC	ID_4946	0	1.17	2.43	3.07
	1	SBK1	ID_4952	0	0.29	1.35	1.36
	1	HTR7P	ID_4962	0	-0.3	2.07	3.55
	1	UCP2	ID_4982	0	0.86	2.47	3.32
	1	PLCG2	ID_4983	0	1.09	3.92	4.11
	1	ACVR1C	ID_4993	0	0.06	0.89	1.44
	1	SBF1	ID_5014	0	0.05	1.4	2.15
	1	PLCD3	ID_5030	0	0.67	1.24	1.27
	1	PLCD1	ID_5033	0	1.53	2.16	2.56
	1	GMCL1	ID_5042	0	1.44	2.2	2.42
	1	ESRRA	ID_5092	0	0.35	1.23	1.08
	1	PAIP2	ID_5097	0	-0.09	0.84	1.32
	1	L3MBTL	ID_5103	0	1.02	0.98	1.59
	1	KIAA1370	ID_5124	0	0.74	0.93	1.17
	1	CD24 /// LOC647456	ID_5125	0	1.61	4.18	4.25
	1	MICA /// MICB	ID_5133	0	1.8	2.26	2.55
	1	THEM2	ID_5136	0	-0.17	1.3	2.05
	1	CBWD6	ID_5142	0	0.1	0.63	1.08
	1	THEM4	ID_5143	0	0.65	1.15	1.38
	1	KIAA1344	ID_5158	0	1.7	2.35	3.35
	1	IGF2	ID_5175	0	-0.14	0.58	1.45
	1	ATOX1	ID_5191	0	0.45	1.47	2.15
	1	LOC653464	ID_5195	0	0.52	1.09	1.07
	1	EIF4EBP2	ID_5198	0	0.82	1.95	1.92
	1	FBXO25	ID_5208	0	0.06	0.97	1.45
	1	DYX1C1	ID_5227	0	1.81	2.77	3.31
	1	FBXO16	ID_5233	0	2.09	3.05	3.78
	1	FBXO18	ID_5236	0	0.58	1.3	1.31
	1	FBXO15	ID_5239	0	0	4.27	4.73
	1	LOC645919	ID_5264	0	0.16	3.49	4.38
	1	FBXO42	ID_5271	0	0.53	0.84	1.02
	1	NMT2	ID_5288	0	0.79	1.23	1.63
	1	CDKN1C	ID_5289	0	0.37	1.65	2.52
	1	CDKN1A	ID_5294	0	1.4	2.5	3.35
	1	FBXO31	ID_5298	0	0.32	1.07	1.37
	1	ATP7B	ID_5306	0	0.35	2.79	2.12
	1	UBXD7	ID_5311	0	0.5	0.87	1.17
	1	STXBP4	ID_5345	0	0.25	1.36	1.18
	1	SLC41A2	ID_5351	0	1.01	1.88	1.95
	1	APLP2	ID_5367	0	0.7	1.06	1.51
	1	APLP1	ID_5369	0	0.23	0.83	1.46
	1	GSTA4	ID_5385	0	0.99	3.42	4.91
	1	KIAA0274	ID_5408	0	0.15	1.23	1.71
	1	DCTN3	ID_5428	0	0.19	1	1.38
	1	ALDOA	ID_5436	0	-0.07	0.56	1.32
	1	ALDOC	ID_5439	0	0.99	3.61	4.75
	1	KRAS	ID_5446	0	0.71	0.9	1.13
	1	KIAA0265	ID_5453	0	0.97	1.15	1.7
	1	ATP5D	ID_5464	0	0.35	0.78	1.36
	1	ZMAT5	ID_5469	0	0.37	1.7	2.44
	1	PMS2L5	ID_5476	0	-0.11	0.24	1.28
	1	SENP5	ID_5480	0	0.48	1.14	1.11
	1	COX15	ID_5505	0	0.1	1.02	1.49
	1	ATP5J	ID_5507	0	-0.02	0.51	1.05
	1	SENP2	ID_5521	0	0.24	1.04	0.97
	1	FAM69A	ID_5541	0	0.63	1.63	1.48
	1	MRPS31	ID_5594	0	-0.05	0.68	1
	1	CEP70	ID_5599	0	0.33	2.11	2.57
	1	C8ORF48	ID_5606	0	0.29	1.85	2.02
	1	C8ORF53	ID_5620	0	0.1	0.58	1.08
	1	LIN7C	ID_5671	0	0.25	1.02	0.9
	1	C8ORF32	ID_5678	0	0.18	1.4	1.42
	1	ALDH2	ID_5689	0	0.4	0.72	1.17
	1	CRYZL1	ID_5695	0	0.31	1.21	1.46
	1	C8ORF70	ID_5768	0	0.8	1.8	2.12
	1	CXORF40B	ID_5785	0	0.27	0.89	1.02
	1	PGD	ID_5789	0	0.65	1.56	1.52
	1	PTGS1	ID_5790	0	0.51	1.69	2.17
	1	GNG4	ID_5803	0	-0.09	1.04	1.32
	1	YIF1B	ID_5815	0	0.16	0.99	1.33
	1	C3ORF15	ID_5835	0	0.06	1.43	3.51
	1	PIR	ID_5843	0	-0.37	0.12	2.33
	1	C3ORF29	ID_5852	0	0.53	1.32	1.66
	1	RRM2	ID_5913	0	0.07	1.2	1.23
	1	KIAA1244	ID_5958	0	-0.13	0.84	1.68
	1	IQGAP2	ID_5994	0	0.14	2.53	5.01
	1	C1ORF201	ID_5996	0	0.43	1.44	2.12
	1	RRAS	ID_6006	0	0.13	1.26	1.93
	1	SEZ6L2 /// LOC652900	ID_6020	0	-0.06	1.09	1.39
	1	SLC40A1	ID_6036	0	2.33	4.78	5.01
	1	CAMTA1	ID_6040	0	0	0.84	1.2
	1	PRDX1	ID_6097	0	-0.01	0.68	1.35
	1	GPR19	ID_6106	0	1.42	1.29	2.68
	1	ATP6V1D	ID_6121	0	0.39	1.24	1.35
	1	ATP6V1A	ID_6123	0	0.68	1.67	1.69
	1	S100A4	ID_6179	0	0.17	0.48	1.15
	1	FLJ37201	ID_6219	0	0.54	1.17	3.53
	1	GSTT1	ID_6225	0	-0.1	0.47	1.01
	1	GSTT2	ID_6226	0	0.37	1.44	1.69
	1	CA5B	ID_6241	0	-0.01	0.48	1.51
	1	SRP54	ID_6265	0	0.6	1.41	1.26
	1	MOCS3	ID_6266	0	-0.11	0.33	0.99
	1	FAM54B	ID_6288	0	0.02	1.03	1.24
	1	FAM54A	ID_6289	0	-0.15	0.86	1.4
	1	C6ORF106	ID_6317	0	0.21	1.61	1.7
	1	MOSPD3	ID_6322	0	0.53	1.13	1.48
	1	SLC27A5	ID_6335	0	0.36	0.9	1.79
	1	CA13	ID_6343	0	-0.01	0.57	1.47
	1	BCAS3	ID_6352	0	-0.51	1.1	2.69
	1	PSCD3	ID_6362	0	1.34	2.11	2.26
	1	TUSC2	ID_6388	0	0.25	1.27	2.15
	1	TUSC4	ID_6391	0	0.59	1.45	1.44
	1	GSTM1	ID_6400	0	-0.03	1.54	2.27
	1	GSTM2	ID_6402	0	0.71	1.88	2.68
	1	GSTM3	ID_6403	0	0.33	1.38	1.99
	1	POR	ID_6416	0	0.88	1.87	1.74
	1	STRAP	ID_6435	0	0.35	0.84	1.23
	1	C6ORF199	ID_6437	0	1.31	2.5	3.76
	1	MNS1	ID_6444	0	-0.13	0.69	1.55
	1	STRBP	ID_6445	0	0.46	1.57	1.77
	1	C3ORF40	ID_6458	0	0.46	1.06	1.17
	1	ACYP1	ID_6478	0	0.4	0.75	1.09
	1	GSTP1	ID_6517	0	0.1	0.47	1.05
	1	C6ORF157	ID_6523	0	0.45	1.15	1.15
	1	C6ORF162	ID_6556	0	0.82	1.88	2.73
	1	CENPQ	ID_6568	0	0	0.59	1.05
	1	CENPI	ID_6578	0	0.35	1.03	1.03
	1	C6ORF173	ID_6597	0	-0.16	0.81	1.22
	1	KIAA1128	ID_6607	0	0.06	1.35	1.52
	1	AQP11	ID_6614	0	0.9	3.01	2.77
	1	OLFML2A	ID_6631	0	0.04	1.58	1.84
	1	NPC2	ID_6643	0	0.28	0.79	1.38
	1	CPSF3L	ID_6652	0	0	0.59	1.23
	1	ACSBG2	ID_6666	0	0.83	1.03	2.06
	1	TMEM50B	ID_6675	0	0.18	1.09	0.8
	1	SSSCA1	ID_6696	0	0.9	1.75	1.79
	1	C21ORF119	ID_6704	0	-0.41	0.87	2.11
	1	PLCXD2	ID_6717	0	0.6	0.83	1.05
	1	FGF9	ID_6732	0	0.25	0.64	1.03
	1	ZNF540	ID_6744	0	1.35	3.13	3.49
	1	KREMEN1 /// LOC64451	ID_6761	0	0.69	3.14	3.92
	1	KIAA1161	ID_6770	0	0.45	1.53	1.48
	1	SNF1LK2	ID_6776	0	0.95	1.44	2.04
	1	C19ORF30	ID_6791	0	-0.03	0.09	5.63
	1	KIAA1155	ID_6807	0	0.08	1.5	4.08
	1	NPAT	ID_6808	0	0.76	0.81	1.08
	1	EPPK1	ID_6818	0	0.12	0.26	2.35
	1	AFTIPHILIN	ID_6821	0	0.86	1.21	1.44
	1	ZNF571	ID_6831	0	0.8	1.83	2.28
	1	PNPLA8	ID_6872	0	0.32	1.96	2.5
	1	IGBP1	ID_6873	0	0.08	0.74	1.1
	1	C17ORF37	ID_6879	0	-0.12	0.85	1.58
	1	ZNF599	ID_6894	0	-0.1	0.82	2.17
	1	FGD6	ID_6897	0	1.09	1.82	2.17
	1	VAC14	ID_6911	0	-0.1	0.62	1.14
	1	BCDO2	ID_6921	0	0.21	1.95	1.95
	1	C17ORF39	ID_6925	0	0.11	1.32	1.34
	1	C17ORF59	ID_6935	0	-0.17	0.46	0.92
	1	C17ORF61	ID_6946	0	0.15	1.24	1.53
	1	C17ORF69	ID_6957	0	1.11	1.33	2.39
	1	C17ORF76	ID_6975	0	0.14	1.18	1.48
	1	FLJ22795 /// LOC3881	ID_6978	0	0.6	1.43	1.39
	1	NSUN6	ID_6982	0	0.82	1.03	1.58
	1	FAM8A1	ID_6986	0	0.68	1.57	2.13
	1	TMEM55A	ID_7019	0	0.3	0.65	1.04
	1	LOC646762	ID_7022	0	0.18	0.55	1.52
	1	GDF11	ID_7024	0	0.4	1.96	2.53
	1	DZIP3	ID_7035	0	0.4	1.11	1.78
	1	C1ORF114	ID_7042	0	0.78	1.47	1.44
	1	C1ORF108	ID_7048	0	0.48	0.99	1.05
	1	GPT2	ID_7058	0	0.49	1.85	1.64
	1	MATN3	ID_7065	0	0.62	0.78	1.9
	1	LOC646848	ID_7124	0	-0.05	0.03	1.05
	1	GOSR2	ID_7128	0	0.3	1.08	1.19
	1	LOC606495	ID_7133	0	0.84	1.39	1.73
	1	KCNJ10	ID_7145	0	0.05	1.35	1.61
	1	GPX4	ID_7164	0	0.12	1.06	1.6
	1	GPX3	ID_7165	0	0.89	3.8	4.69
	1	KIAA0494	ID_7207	0	0.56	0.68	1.14
	1	FAM89B	ID_7212	0	0.85	2.06	3
	1	LOC374491 /// LOC642	ID_7214	0	0.42	-0.02	1.53
	1	TEX14	ID_7231	0	0.11	0.49	1.45
	1	TEX15	ID_7233	0	2.1	3.47	3.86
	1	LOC132321	ID_7235	0	1.38	1.84	2.27
	1	ARD1A	ID_7288	0	0.29	1.05	1.33
	1	RANBP9	ID_7313	0	0.18	0.69	1.04
	1	GPRC5A	ID_7354	0	0.47	0.9	1.18
	1	SLC39A4	ID_7376	0	0.26	1.35	1.68
	1	SLC39A3	ID_7380	0	0.56	1.3	1.84
	1	GPS2	ID_7392	0	0.14	1.31	1.4
	1	FAM80A	ID_7395	0	0.12	1.02	1.13
	1	LTA4H	ID_7398	0	0.66	1.59	1.92
	1	HIST1H2BK	ID_7416	0	0.06	1.21	1.67
	1	HIST1H2BI	ID_7418	0	-0.07	0.75	1.35
	1	TIGD3	ID_7422	0	0.5	1.49	2.09
	1	TIGD4	ID_7423	0	0.05	0.54	1.22
	1	TIGD7	ID_7427	0	-0.25	0.64	1.33
	1	ZNF641	ID_7431	0	0.23	1.97	2.25
	1	ZNF650	ID_7458	0	0.17	0.97	1.02
	1	ZNF77	ID_7468	0	1.5	1.64	2.35
	1	DIABLO	ID_7487	0	0	1.27	1.51
	1	ZNF70	ID_7494	0	0.47	1.58	1.56
	1	LOC653524	ID_7516	0	0.43	0.45	1.79
	1	RTN2	ID_7542	0	1.88	3.58	3.55
	1	RTN3	ID_7544	0	0.21	0.87	1.02
	1	ZNF682	ID_7547	0	0.6	0.85	1.45
	1	ZNF684	ID_7566	0	0.95	1.78	1.95
	1	ZNF694	ID_7577	0	0.79	1.77	1.86
	1	HIST1H2AC	ID_7586	0	0.35	0.54	1.49
	1	PITRM1	ID_7611	0	0.43	1.01	1.15
	1	DKFZP313A2432	ID_7618	0	0.16	0.85	1.06
	1	HIST1H2BC	ID_7619	0	0.02	0.62	1.62
	1	HIST1H2BD	ID_7620	0	0.59	1.5	2.33
	1	HIST1H2BE	ID_7622	0	0.02	1.1	1.61
	1	HIST1H2BF	ID_7624	0	0.46	1.36	2.01
	1	HIST1H2BG	ID_7625	0	1.57	2.37	2.79
	1	HIST1H2BH	ID_7626	0	0.33	1.28	1.73
	1	ZNF664	ID_7641	0	0.34	0.87	1.17
	1	FLJ10986	ID_7642	0	-0.37	0.28	1.54
	1	HIST1H2AM	ID_7654	0	1.17	1.58	2.7
	1	LOC400927	ID_7682	0	-0.05	0.37	1.27
	1	GMPPB	ID_7699	0	-0.09	0.57	0.95
	1	GMPPA	ID_7705	0	-0.16	0.34	0.91
	1	REL	ID_7773	0	0.23	1.03	1.52
	1	HSPA2	ID_7774	0	2.48	5.01	4.85
	1	TMEM45A	ID_7787	0	0.49	1.9	2.67
	1	MIF4GD	ID_7795	0	-0.05	0.39	0.99
	1	SYT1	ID_7800	0	1.25	3.09	3.37
	1	RAD51C	ID_7801	0	0.19	1.56	1.51
	1	GOT1	ID_7821	0	0.5	1.75	1.52
	1	KIF13B	ID_7827	0	1.81	2.15	2.86
	1	BRP44	ID_7828	0	0.22	1.47	1.63
	1	SUCLG1	ID_7833	0	0.12	0.95	1.1
	1	AXUD1	ID_7856	0	0.83	1.22	1.9
	1	FLJ37035	ID_7868	0	-0.08	0.4	1.09
	1	LCMT1	ID_7871	0	0.77	1.72	1.77
	1	HOMER1	ID_7881	0	0.61	1.03	1.24
	1	LAMA1	ID_7888	0	-0.18	1.4	2.11
	1	BAG4	ID_7908	0	0.37	1.17	1.31
	1	SLC25A1	ID_7917	0	0.32	0.99	1.05
	1	SLC25A4	ID_7922	0	0.96	3.09	3.63
	1	HERC5	ID_7932	0	1.6	2.3	2.5
	1	HERC1	ID_7939	0	0.51	1.22	1.19
	1	LOC646927	ID_7944	0	2.6	5.13	5.27
	1	MLF2	ID_7956	0	0.19	1.23	0.95
	1	MLF1	ID_7959	0	1.43	3.91	3.96
	1	FAM79A	ID_7960	0	1.16	2.45	2.55
	1	CDKN3	ID_7972	0	0.35	1.45	1.32
	1	MLL3	ID_7999	0	0.19	0.45	1.24
	1	NQO2	ID_8002	0	1.55	3.16	3.49
	1	KIAA0350	ID_8018	0	1.48	2.16	2.84
	1	TP53AP1	ID_8025	0	0.14	1.31	2.09
	1	DCXR	ID_8039	0	0.21	1.4	1.84
	1	HPS3	ID_8052	0	0.48	1.22	1.26
	1	HPSE	ID_8058	0	1.35	2.55	3.33
	1	ABHD10	ID_8061	0	0.31	1.19	0.96
	1	RSU1	ID_8070	0	0.46	1.71	1.88
	1	KIAA1797	ID_8133	0	-0.06	0.89	1.64
	1	KIAA1799	ID_8134	0	-0.17	0.63	1.12
	1	ZNF397	ID_8137	0	0.58	1.55	1.55
	1	CYP1A1	ID_8154	0	0.01	0.17	4.32
	1	ARIH1	ID_8179	0	0.04	0.98	1.09
	1	ARIH2	ID_8180	0	0.14	0.52	1.09
	1	TSGA10	ID_8207	0	0.86	0.85	3.65
	1	ZNF347	ID_8224	0	0.71	1.99	2.02
	1	MRPL2	ID_8252	0	0.05	1.01	1.57
	1	LOC387790	ID_8281	0	2.18	2.15	3.57
	1	C10ORF118	ID_8295	0	0.12	1.14	1.57
	1	ZNF365	ID_8299	0	0.23	0.29	1.18
	1	SF3B5	ID_8301	0	0.05	0.91	1.2
	1	SORBS1	ID_8317	0	1.51	4.6	5.14
	1	PAPSS1	ID_8329	0	0.95	2.08	2.29
	1	LOC387763	ID_8340	0	0.88	2.33	2.53
	1	ANKHD1	ID_8343	0	0.66	0.7	1.29
	1	GK3P	ID_8368	0	0.64	0.86	1.49
	1	RNF141	ID_8392	0	0.38	1.55	1.62
	1	BAIAP2	ID_8411	0	1.87	3.98	3.67
	1	SMARCA3	ID_8435	0	0.47	1.31	1.53
	1	LRBA	ID_8443	0	-0.06	1.01	1.47
	1	ZNF331	ID_8451	0	0.39	0.44	1.1
	1	RNF168	ID_8464	0	0.04	0.92	1.15
	1	EPS15	ID_8473	0	0.03	0.89	1.07
	1	LAMP3	ID_8483	0	1.44	2.67	3.69
	1	NRGN	ID_8528	0	1.43	2.52	3.25
	1	LOC285442	ID_8539	0	0.33	1.37	1.36
	1	FAM103A1	ID_8593	0	0.14	0.9	1.01
	1	LOC283219	ID_8595	0	0.51	1.46	1.53
	1	CD40	ID_8604	0	0.19	2.1	2.16
	1	CCRK	ID_8605	0	1.18	1.94	2.39
	1	LOC285346	ID_8607	0	1	1.69	2.15
	1	TXNL5	ID_8621	0	0.34	1.18	1.3
	1	PTCD2	ID_8677	0	-0.01	1.13	1.23
	1	SPINK2	ID_8696	0	0.07	0.8	3.69
	1	CCNI	ID_8717	0	0.15	0.75	1.08
	1	FLJ37798	ID_8725	0	0.2	0.9	1.56
	1	THAP9	ID_8732	0	-0.09	1.59	3.29
	1	THAP6	ID_8735	0	-0.05	1	1.29
	1	GPM6A	ID_8751	0	0.33	2.18	2.88
	1	C12ORF5	ID_8761	0	0.38	1.33	1.36
	1	CD24	ID_8762	0	2.41	3.51	3.77
	1	KHK	ID_8784	0	0.69	2.3	2.31
	1	LOC201895	ID_8801	0	0.8	3.04	2.79
	1	KIAA1718	ID_8809	0	0.79	1.42	1.77
	1	RIOK3	ID_8810	0	0.88	0.96	1.73
	1	RAD17	ID_8815	0	0.36	1.06	1.3
	1	ARFRP1	ID_8820	0	-0.15	0	1
	1	OSBP	ID_8848	0	0.39	0.85	1.12
	1	CXCR4	ID_8862	0	0.56	1.24	1.53
	1	ZC3H10	ID_8869	0	-0.11	0.98	1.72
	1	LMBRD1	ID_8873	0	0.06	0.61	1.15
	1	PANK3	ID_8888	0	0.63	1.97	1.9
	1	PCYOX1	ID_8895	0	0.8	1.37	1.41
	1	HIBCH	ID_8918	0	0.13	0.92	1.42
	1	SPAG9	ID_8956	0	1.25	2.24	2.4
	1	NPHP1	ID_8990	0	0.52	1.5	2.29
	1	ZNF488	ID_9012	0	0.74	3.69	3.36
	1	DLEU1	ID_9027	0	0.3	1.26	1.78
	1	FBXL20	ID_9058	0	1	1.24	1.49
	1	FLNC	ID_9070	0	0.39	1.41	1.31
	1	RAB11A	ID_9102	0	0.15	1.22	1.3
	1	SLC44A3	ID_9131	0	0.02	1.64	2.93
	1	ZNF452	ID_9134	0	0.04	1.73	2.9
	1	FLJ42351	ID_9163	0	-0.11	-0.01	1.42
	1	AZI1	ID_9189	0	0.99	2.54	2.64
	1	WIPI1	ID_9208	0	0.99	2.04	1.97
	1	TFIP11 /// LOC653715	ID_9211	0	0.59	1	1.12
	1	LOC116349	ID_9229	0	-0.14	0.99	1.39
	1	CDK5	ID_9257	0	0.01	1.26	1.88
	1	ATP1B2	ID_9325	0	-0.24	-0.14	1.18
	1	PITPNA	ID_9327	0	0.72	1.54	1.69
	1	LILRA3	ID_9336	0	0	0	1.86
	1	SLC12A6	ID_9345	0	-0.38	0.01	1.19
	1	EIF4EBP3 /// MASK-BP	ID_9353	0	0.72	0.99	1.13
	1	CXORF23	ID_9387	0	0.44	1.57	1.68
	1	FAM91A1	ID_9404	0	0.5	1.25	1.47
	1	FAM96B	ID_9408	0	0.2	0.9	1.03
	1	TNFRSF11A	ID_9417	0	2.16	2.93	3.52
	1	P15RS	ID_9447	0	0.32	1.42	1.12
	1	STARD10	ID_9450	0	0.48	1.2	1.29
	1	BRP44L	ID_9466	0	0.35	1.61	1.59
	1	MALAT1	ID_9471	0	1.19	1.43	2
	1	ZYG11BL	ID_9500	0	1.07	2.52	3.26
	1	LMBR1	ID_9511	0	0.68	1.56	1.76
	1	GABARAPL2	ID_9530	0	0.41	1.46	1.84
	1	GABARAPL1	ID_9531	0	1.17	1.65	2.43
	1	AHCYL1	ID_9544	0	0.31	0.99	1.09
	1	EGR1	ID_9559	0	0.64	0.85	2.02
	1	DAPK3	ID_9570	0	0.39	1.24	1.41
	1	LUM	ID_9582	0	1.58	2.65	3.6
	1	ECHS1	ID_9585	0	0.16	1.17	1.28
	1	LOC644053	ID_9588	0	0.36	0.9	1.4
	1	TCP11L2	ID_9610	0	0.61	0.46	2.01
	1	TMEM149	ID_9629	0	0.1	0.8	1.2
	1	TMEM14A	ID_9634	0	0.39	1.29	1.61
	1	CHCHD7	ID_9680	0	1.63	2.66	2.75
	1	CHCHD6	ID_9681	0	0.23	0.78	1.37
	1	TMEM127	ID_9688	0	1.06	1.36	1.66
	1	LOC441054	ID_9703	0	0.69	1.37	2.33
	1	TMEM118	ID_9714	0	0.5	1.7	1.88
	1	ZNF138	ID_9766	0	-0.09	0.42	1.06
	1	ZNF177	ID_9784	0	0.17	1.23	1.74
	1	ZSCAN21	ID_9791	0	0.65	1.52	1.82
	1	ZNF165	ID_9800	0	-0.24	0.31	1.64
	1	CDH18	ID_9808	0	0.14	1.18	1.74
	1	KIAA1545	ID_9816	0	-0.03	1.27	1.6
	1	CSNK2A2	ID_9829	0	0.91	1.23	1.74
	1	KIAA1576	ID_9848	0	2.61	2.79	3.47
	1	FABP4	ID_9874	0	0	0.03	1.94
	1	CASP6	ID_9890	0	1.37	1.9	2.47
	1	CASP9	ID_9898	0	1.39	2.35	2.88
	1	SLC35E4	ID_9919	0	0.85	2.68	2.83
	1	GDAP1	ID_9936	0	0.4	2.16	3.4
	1	GMDS	ID_9947	0	-0.16	2.06	2.95
	1	LOC642423 /// LOC643	ID_9952	0	0.86	0.9	1.32
	1	C7ORF41	ID_9954	0	1.53	1.52	3.21
	1	GLDC	ID_9977	0	0.65	2.08	2.26
	1	RAB24	ID_9992	0	0.73	0.87	1.17
	1	RAB26	ID_9994	0	0.3	1.86	3.02
	1	C7ORF31	ID_10003	0	0.27	0.89	1.57
	1	OPTN	ID_10015	0	-0.02	0.5	1.12
	1	GLCE	ID_10020	0	1.75	2.35	2.55
	1	C7ORF38	ID_10034	0	0.27	1.1	1.81
	1	RIMS3	ID_10054	0	0.76	3.52	2.69
	1	RYBP	ID_10063	0	1.07	1.81	2.01
	1	PLA2G4A	ID_10065	0	1.73	3.26	3.75
	1	ATP2A3	ID_10067	0	0.04	1.16	1.4
	1	ATP2A1	ID_10070	0	0.4	0.69	1.8
	1	RAB5B	ID_10080	0	0.32	0.63	1.01
	1	TTLL6	ID_10088	0	0.01	0.06	1.2
	1	TTLL7	ID_10089	0	1.22	1.97	2.42
	1	RHBDD2	ID_10117	0	0.47	1.7	1.5
	1	ZDHHC11	ID_10123	0	1	2.07	2.36
	1	LONPL	ID_10127	0	0.36	0.83	1.31
	1	RAB3A	ID_10135	0	1.07	1.42	1.96
	1	RAB3D	ID_10139	0	1.14	4	3.6
	1	RAB2B	ID_10168	0	0.8	1.69	1.64
	1	SYNPO2	ID_10175	0	0.7	2.15	2.12
	1	2014-09-04	ID_10194	0	0.54	2.48	3.85
	1	C6ORF203	ID_10205	0	1.14	2.57	2.54
	1	ZNF184	ID_10210	0	0.14	2.1	2.3
	1	LOC284023	ID_10226	0	0.76	0.82	1.79
	1	SPA17	ID_10234	0	0.03	1.56	2.56
	1	MVK	ID_10249	0	0.68	1.88	2.06
	1	TMEM83	ID_10256	0	0.15	0.33	2.31
	1	FXYD7	ID_10272	0	-0.07	2.24	4.36
	1	MUT	ID_10276	0	0.13	1	1.44
	1	SEPW1	ID_10287	0	0.49	1.33	1.14
	1	GRTP1	ID_10301	0	-0.2	0.88	1.66
	1	GM2A	ID_10315	0	0.73	1.82	2.45
	1	TMEM175	ID_10327	0	0.3	0.67	1.05
	1	MT3	ID_10345	0	-0.23	0.24	0.87
	1	TMEM74	ID_10354	0	0.4	3.52	4.34
	1	TMEM65	ID_10360	0	0.46	0.98	1.27
	1	TMEM66	ID_10362	0	0.36	1.04	1
	1	NKIRAS2	ID_10366	0	0.34	1.08	1.56
	1	ROPN1L	ID_10375	0	2.09	5.39	5.11
	1	LOC653193	ID_10398	0	1.44	2.79	3.82
	1	TMEM52	ID_10401	0	0.26	2.52	2.41
	1	TMEM47	ID_10417	0	0.68	1.19	1.35
	1	C20ORF108	ID_10435	0	0.64	1.25	1.35
	1	FLJ42562	ID_10438	0	3.11	3.66	4.47
	1	CITED2	ID_10453	0	0.09	1.24	1.56
	1	FSTL5	ID_10456	0	0.02	0.79	4.65
	1	C20ORF118	ID_10464	0	0.09	0.81	1.37
	1	ZNF235	ID_10484	0	0.21	0.4	1.27
	1	C20ORF111	ID_10490	0	0.43	1.02	1.33
	1	ZNF225	ID_10507	0	0.99	1.13	1.84
	1	ZNF213	ID_10530	0	0.23	1.28	1.2
	1	C20ORF142	ID_10552	0	0.44	0.56	1.38
	1	ZNF277	ID_10592	0	0.95	1.82	2.47
	1	AP1S2 /// LOC653653	ID_10600	0	0.26	1.26	1.31
	1	PLA2G12A	ID_10616	0	0.72	1.85	2.39
	1	C20ORF121	ID_10617	0	0.25	1.38	1.08
	1	TSPAN2	ID_10676	0	0.02	0.97	1.09
	1	TSPAN7	ID_10683	0	-0.13	0.15	1.56
	1	C14ORF179	ID_10705	0	0.58	1.43	1.84
	1	KIAA1468	ID_10709	0	0.57	1.04	1.07
	1	EID3	ID_10718	0	0.27	1.92	1.99
	1	STX7	ID_10719	0	1.04	2.07	2.01
	1	PCYT1B	ID_10733	0	0.34	1.61	1.23
	1	C18ORF8	ID_10742	0	1.39	2.47	2.81
	1	OVOS2 /// LOC440080	ID_10760	0	0.38	1.84	2.1
	1	ZNF204	ID_10761	0	0.68	2.01	2.52
	1	TRIM9	ID_10775	0	0	0.39	1.59
	1	HEMK1	ID_10785	0	-0.04	0.54	1.1
	1	ZNF19 /// ZNF23	ID_10792	0	0.5	1.43	1.44
	1	C13ORF24	ID_10832	0	0.18	0.78	1.03
	1	C13ORF31	ID_10849	0	0.77	2.44	2.62
	1	ASMTL	ID_10860	0	2.72	4.62	4.84
	1	EIF2B3	ID_10862	0	-0.03	1.05	1.24
	1	C14ORF109	ID_10872	0	0.12	0.94	1.66
	1	C14ORF103	ID_10880	0	0.84	1.18	2.01
	1	C14ORF133	ID_10934	0	-0.08	1.11	1.42
	1	C14ORF132	ID_10935	0	1.53	1.65	2.24
	1	CBR4	ID_10959	0	0.84	0.9	1.36
	1	C14ORF145	ID_10963	0	0.1	1.37	1.25
	1	C14ORF147	ID_10966	0	0.66	1.43	1.31
	1	CHMP1B	ID_10967	0	1.3	1.94	2.6
	1	C14ORF143	ID_10969	0	-0.03	1.45	1.83
	1	C14ORF142	ID_10970	0	-0.01	0.79	1.18
	1	CBR1	ID_10983	0	-0.05	0.86	1.18
	1	NMU	ID_10991	0	0.89	1.52	2.11
	1	NLK	ID_10994	0	0.53	0.92	1.16
	1	C14ORF125	ID_11002	0	0.67	2.18	2.33
	1	CBX7	ID_11023	0	0.91	1.48	1.76
	1	SDCBP	ID_11042	0	0.07	0.92	1.15
	1	PAQR5	ID_11061	0	2.01	3.16	3.54
	1	LOC283537	ID_11069	0	2.4	2.59	3.79
	1	CASC4	ID_11081	0	0.45	1.09	1.18
	1	FN3KRP	ID_11082	0	0.45	1.22	1.05
	1	CASC1	ID_11088	0	1.34	4.14	5.12
	1	C20ORF160	ID_11090	0	-0.02	0.21	1.09
	1	SUOX	ID_11106	0	0.15	1.38	1.2
	1	RABL4	ID_11107	0	0.33	1.34	2.11
	1	MPP1	ID_11110	0	1.41	2.34	2.35
	1	RABL5	ID_11111	0	0.4	1.79	2.38
	1	MPP7	ID_11123	0	0.69	3.82	4.04
	1	ING1	ID_11156	0	1.88	2.35	2.68
	1	NTS	ID_11164	0	0.55	2.9	4.41
	1	LRRC6	ID_11192	0	0.44	1.75	2.39
	1	FLJ20021	ID_11193	0	0.94	2.06	3.11
	1	LOC283788	ID_11210	0	0.09	0.6	1.1
	1	LGALS3 /// GALIG	ID_11214	0	0.06	0.92	1.12
	1	MGC12966	ID_11226	0	0.66	2.87	2.46
	1	KISS1R	ID_11236	0	0.32	1.28	1.64
	1	ENAH	ID_11290	0	1.12	2.05	2.01
	1	BEX2	ID_11323	0	0.98	3.79	5.06
	1	PGM2L1	ID_11378	0	2.15	3.66	3.82
	1	CTTNBP2NL	ID_11405	0	0.71	1.28	1.72
	1	SCPEP1	ID_11406	0	0.64	1.14	1.7
	1	MGC99813	ID_11432	0	-0.02	2.32	2.73
	1	C10ORF97	ID_11459	0	0.28	1.01	1.5
	1	C10ORF78	ID_11480	0	-0.02	1.38	1.93
	1	C10ORF79	ID_11482	0	-0.03	1.78	2.69
	1	RABEP1	ID_11490	0	-0.03	0.96	1.3
	1	LOC374395	ID_11499	0	0.32	0.73	1.06
	1	CYP39A1	ID_11507	0	2.94	3.45	4.89
	1	C10ORF75	ID_11511	0	0.34	0.66	3.72
	1	C10ORF61	ID_11528	0	0.42	0.48	1.14
	1	C10ORF46	ID_11535	0	0.35	0.82	1.11
	1	SPHAR	ID_11565	0	-0.21	0.59	1.27
	1	AP2A1	ID_11577	0	-0.17	0.9	1.84
	1	FBLN5	ID_11582	0	0.61	1.02	1.37
	1	GFPT2	ID_11585	0	1.52	3.58	3.76
	1	TTC9C	ID_11596	0	0.21	1.34	1.21
	1	SLC25A23	ID_11610	0	-0.11	1.24	2.16
	1	SLC25A39	ID_11644	0	0.45	1.29	1.74
	1	EEF1A2	ID_11675	0	-0.1	0.3	1
	1	SLC25A11	ID_11681	0	-0.01	0.91	1.24
	1	SLC25A10	ID_11686	0	0.13	1.13	0.92
	1	YIPF1	ID_11698	0	0.48	1.49	1.58
	1	LOC644890 /// LOC649	ID_11707	0	0.17	1.1	2.19
	1	EML2	ID_11730	0	0.04	0.35	1.17
	1	TUBGCP6	ID_11754	0	0.11	0.64	1.18
	1	HMG20B	ID_11795	0	0.56	1.57	1.91
	1	LOC283674	ID_11796	0	0	0	1.29
	1	FCHSD1	ID_11805	0	1.16	1.58	1.94
	1	HEXIM1	ID_11830	0	0.55	1.5	1.34
	1	NUBPL	ID_11842	0	-0.24	0.32	1.37
	1	ACN9	ID_11853	0	0.04	1.53	2.62
	1	GRAMD1C	ID_11869	0	1.36	3.2	3.42
	1	UEVLD	ID_11879	0	0.03	0.76	1.16
	1	LOC641799 /// LOC641	ID_11881	0	0.36	0.85	1.09
	1	FTCD	ID_11890	0	0.11	0.02	1.48
	1	F25965	ID_11891	0	0.97	1.7	1.68
	1	RLN2	ID_11912	0	0	0.4	2.58
	1	FLJ35390	ID_11916	0	0.06	0.48	1.07
	1	CCBL1	ID_11933	0	0.29	0.57	1.86
	1	SYNGR2	ID_11971	0	0.83	1.6	1.69
	1	PPM2C	ID_11985	0	0.58	0.92	1.22
	1	VAT1	ID_11987	0	0.07	1.19	1.48
	1	PPM1D	ID_11992	0	0.83	1.72	2.08
	1	PPM1E	ID_11994	0	0.49	4.14	4.15
	1	PPM1J	ID_11996	0	1.43	2.68	3.16
	1	ATG4B	ID_12001	0	0.57	1.28	1.26
	1	ATG4A	ID_12004	0	1.2	2.34	2.77
	1	KIF9	ID_12010	0	0.65	1.24	1.57
	1	TSPAN33	ID_12016	0	0.27	2.38	3.67
	1	AP3M1	ID_12018	0	-0.02	0.56	1.08
	1	TSPAN31	ID_12021	0	-0.23	0.15	0.98
	1	GCHFR	ID_12025	0	0.35	3.34	3.58
	1	TSPAN13	ID_12036	0	1.55	2.58	2.74
	1	SAMHD1	ID_12037	0	0.26	0.95	1.14
	1	SH3BGRL2	ID_12052	0	0.8	1.72	1.75
	1	SNCA	ID_12062	0	0.46	1.02	1.08
	1	NUDT16	ID_12073	0	0.18	0.12	1.28
	1	HCFC1R1	ID_12086	0	-0.23	0.64	1.69
	1	NUDT11	ID_12088	0	0.24	1.13	1.49
	1	FAM122C	ID_12102	0	1.23	1.64	2.75
	1	GYS1	ID_12105	0	0.33	1.45	1.17
	1	NRBF2	ID_12112	0	0.31	1.12	1.64
	1	ADAL	ID_12113	0	-0.09	0.06	1.22
	1	FAM121B	ID_12119	0	-0.03	0.99	1.42
	1	NFKB2	ID_12143	0	1.04	0.91	1.92
	1	ORMDL2	ID_12166	0	0.23	0.66	1.18
	1	TNCRNA	ID_12195	0	1.52	1.76	2.18
	1	ITPR1	ID_12203	0	0.41	2.68	2.32
	1	ITPR2	ID_12205	0	0.17	0.8	1.42
	1	CCDC85B	ID_12221	0	0.49	1.75	1.77
	1	PHOSPHO1	ID_12232	0	0.12	0.8	1.2
	1	ITPK1	ID_12235	0	0.47	1.22	1.38
	1	SOCS7	ID_12248	0	0.65	1.55	1.78
	1	TFB1M	ID_12263	0	0.28	1.36	1.78
	1	NRBP2	ID_12265	0	0.87	1.51	1.96
	1	PPME1	ID_12269	0	0.02	1.12	1.14
	1	FTH1	ID_12276	0	-0.06	0.36	1.02
	1	REEP6	ID_12280	0	2.28	5.54	6.54
	1	CSTF3	ID_12283	0	-0.09	-0.16	1.25
	1	REEP1	ID_12291	0	0.39	3.2	2.96
	1	LOC196394	ID_12297	0	0.57	3.32	4.5
	1	KLRC1 /// KLRC2	ID_12299	0	0.9	2.08	2.94
	1	HRASLS3	ID_12303	0	0.16	0.87	1.19
	1	WRB	ID_12310	0	0.25	1.18	1.82
	1	LOC439911	ID_12352	0	0.95	1.51	2.32
	1	FOXRED1	ID_12410	0	0.36	0.63	1.16
	1	CYP2R1	ID_12411	0	-0.27	3.34	4.26
	1	ASAH1	ID_12424	0	0.53	1.26	1.83
	1	ST6GALNAC3	ID_12429	0	1	5.04	4.95
	1	NDUFB10	ID_12444	0	0.08	0.96	1.11
	1	ACSL1	ID_12478	0	1.17	2.03	2.29
	1	SNRK	ID_12479	0	0.45	0.69	1.1
	1	PPP3CB	ID_12480	0	0.3	1.17	1.09
	1	ACSL3	ID_12487	0	1.24	1.59	1.95
	1	ZXDC	ID_12518	0	0.46	0.86	1.06
	1	SND1	ID_12526	0	0.13	0.65	1.27
	1	STMN4	ID_12537	0	0.01	0.68	1.13
	1	VAMP3	ID_12550	0	0.26	1.48	1.75
	1	TTC3	ID_12567	0	0.53	0.59	1.33
	1	TTC1	ID_12569	0	0.21	1.25	1.46
	1	PLRG1	ID_12601	0	0.08	0.99	1.18
	1	FLJ30679	ID_12606	0	0.03	0.18	1.12
	1	FAM14B	ID_12611	0	0.28	0.7	1.41
	1	DHRS1	ID_12615	0	0.67	0.94	1.41
	1	DHRS2	ID_12616	0	0.15	6.12	8.02
	1	TNFSF9	ID_12638	0	1.28	3.62	5.18
	1	CYP3A5	ID_12647	0	-0.08	0.31	1.32
	1	SAP30L	ID_12656	0	0.06	1.07	1.29
	1	MTF1	ID_12664	0	1.02	1.98	2.34
	1	CHGB	ID_12667	0	0	0.79	2.1
	1	FLJ42117	ID_12671	0	-0.02	0.03	1.63
	1	IFI30	ID_12673	0	2.26	3.45	4.06
	1	KLF5	ID_12680	0	1.41	2.47	2.72
	1	KLF9	ID_12685	0	0.9	1.15	2.2
	1	HPCAL4	ID_12686	0	0	1.97	4.29
	1	G6PD	ID_12720	0	0.85	2.08	2.84
	1	KLC3	ID_12746	0	0.29	0.54	1.13
	1	FKBP1B	ID_12748	0	1.89	3.34	3.38
	1	MLLT3	ID_12769	0	0.31	2.13	2.7
	1	CHML	ID_12776	0	0.3	0.72	1.11
	1	PDRG1	ID_12789	0	0.16	0.96	1.25
	1	SNX2	ID_12813	0	0.24	1.15	1.26
	1	RRAGA	ID_12814	0	0.14	1.11	0.97
	1	SNX1	ID_12815	0	0.35	0.95	1.11
	1	RRAGC	ID_12822	0	0.46	1.09	1.39
	1	CYFIP2	ID_12840	0	0.79	3.14	3.31
	1	UBE2H	ID_12878	0	1.24	1.67	1.86
	1	IMMP1L	ID_12884	0	-0.08	1.11	1.85
	1	UBE2W	ID_12898	0	0.53	1.14	1.44
	1	LOC283861	ID_12953	0	0.01	0.69	2.58
	1	LOC352909	ID_12979	0	1.7	4.37	4.26
	1	SYNE2	ID_12996	0	0.09	0.04	1.14
	1	TTC26	ID_13016	0	0.19	1.57	1.71
	1	SYNJ1	ID_13018	0	0.77	1.05	1.33
	1	TTC29	ID_13019	0	2.27	5.86	5.8
	1	AP1S3	ID_13023	0	1.64	2.7	2.75
	1	AP1S2	ID_13026	0	0.29	1.32	1.21
	1	ZDHHC3	ID_13041	0	0.27	1.21	1.39
	1	CDC14B /// CDC14C	ID_13080	0	1.64	1.68	2.51
	1	KCNE1	ID_13089	0	0.81	4.29	3.76
	1	TTC18	ID_13118	0	1.03	1.47	2.57
	1	PRKAR2B	ID_13152	0	0.97	2.36	2.24
	1	ELOVL3	ID_13156	0	1.03	4.48	4.78
	1	ELOVL7	ID_13158	0	0.31	3.84	4.6
	1	SAR1A	ID_13164	0	0.42	0.89	1.03
	1	PQLC3	ID_13168	0	0.65	3.6	4.31
	1	BBS7	ID_13193	0	1.1	1.66	1.95
	1	LOC92270	ID_13207	0	0.91	1.59	2.96
	1	LOC129285	ID_13218	0	0.71	1.81	2.14
	1	HIVEP3	ID_13227	0	-0.15	1.73	2.34
	1	ORC4L	ID_13234	0	0.69	1.59	1.62
	1	BBS1	ID_13254	0	0.67	0.81	1.01
	1	FAM27A	ID_13272	0	-0.4	0.09	1.89
	1	DKFZP564O0823	ID_13287	0	0.01	0.73	2.32
	1	AMDHD1	ID_13302	0	0	0.96	2.77
	1	JAK1	ID_13305	0	0.3	1.18	1.01
	1	FAM105A	ID_13316	0	0.35	1.96	1.5
	1	ENPP2	ID_13343	0	0.69	1.1	1.61
	1	ENPP4	ID_13345	0	0.42	0.86	1.68
	1	FAM102B	ID_13350	0	0.99	1.35	1.82
	1	MRLC2	ID_13352	0	-0.06	0.74	0.98
	1	AP1B1	ID_13363	0	0.18	0.85	1.27
	1	EDNRB	ID_13370	0	1.33	1.71	2.56
	1	FAM100B	ID_13376	0	0.66	0.81	1.19
	1	ZCCHC12	ID_13381	0	0.05	2.14	4.58
	1	ZCCHC17	ID_13388	0	1.06	2.26	2.13
	1	PIP5K3	ID_13394	0	0.51	0.86	1.12
	1	PPP1R2	ID_13424	0	0.79	2.09	1.96
	1	FAHD1	ID_13435	0	-0.09	0.77	1.16
	1	SOX4	ID_13467	0	1.94	2	2.77
	1	WDR8	ID_13496	0	0.05	1.38	1.36
	1	LOC124512	ID_13539	0	-0.15	0.71	1.18
	1	MSH5	ID_13556	0	0.22	0.86	1.15
	1	SLC17A7	ID_13563	0	-0.11	1.29	3.06
	1	SIPA1L2	ID_13607	0	0.93	3.26	3.93
	1	SCYL2	ID_13614	0	0.26	1.4	1.58
	1	KBTBD3	ID_13630	0	0.75	2.34	3.02
	1	CAMK2N2	ID_13647	0	1.34	1.43	2.45
	1	CDR2L	ID_13666	0	0.26	0.73	1.13
	1	CCDC28A	ID_13678	0	1.14	2.19	2.7
	1	NALP1	ID_13711	0	2.36	4.08	4.39
	1	YKT6	ID_13747	0	0.26	1.32	1.55
	1	LOC493754	ID_13805	0	-0.09	2.23	3.32
	1	NBEAL1 /// ALS2CR16	ID_13810	0	1.32	1.76	1.97
	1	ROM1	ID_13834	0	0.06	0.24	1.17
	1	PRRG1	ID_13844	0	0.63	1.28	1.23
	1	CEP290	ID_13865	0	-0.26	0.24	0.94
	1	LOC92017 /// LOC6537	ID_13875	0	0.45	2.53	2.11
	1	BIN3	ID_13885	0	0.74	0.98	1.23
	1	TK1	ID_13894	0	0.18	1.34	1.78
	1	IDH2	ID_13897	0	0.38	1.55	1.75
	1	IDH1	ID_13898	0	0.92	2.43	2.61
	1	SAP130	ID_13915	0	0.65	1.6	1.76
	1	IDI1	ID_13923	0	1.2	2.08	2.57
	1	COL21A1	ID_13925	0	0.09	0.7	1.58
	1	SIGIRR	ID_13940	0	0.12	1.04	0.93
	1	UROS	ID_13946	0	0	1.38	1.6
	1	MYO5B	ID_13952	0	2.34	3.3	4.61
	1	TES	ID_13954	0	0.61	1.38	1.75
	1	MFGE8	ID_13990	0	0.4	0.84	1.49
	1	IGSF8	ID_13992	0	1.45	2.09	3.07
	1	IGSF3	ID_13997	0	0.71	3.44	3.53
	1	ASRGL1	ID_14014	0	1.19	2.44	2.66
	1	TST	ID_14031	0	0.38	2.8	2.95
	1	IGSF4C	ID_14040	0	0.66	1.72	3.62
	1	C5ORF27	ID_14045	0	-0.04	0.19	3.1
	1	ETNK1	ID_14096	0	0.66	0.85	1.28
	1	ETNK2	ID_14098	0	0.68	1.66	3.18
	1	C5ORF32	ID_14108	0	0.48	2.08	2.49
	1	TUBB2B	ID_14125	0	4.23	6.66	6.82
	1	C9ORF43	ID_14137	0	-0.01	0.82	2.36
	1	C9ORF45	ID_14139	0	1.3	1.76	2.02
	1	MGC50559	ID_14156	0	0	3.28	3.95
	1	BCL2L12	ID_14158	0	0.8	0.96	1.17
	1	TRAPPC4	ID_14165	0	0.37	1.3	1.09
	1	TRAPPC1	ID_14171	0	-0.03	0.94	1.6
	1	TRAPPC3	ID_14176	0	0.11	1.15	1.33
	1	TRAPPC2	ID_14177	0	-0.02	0.4	1.07
	1	C9ORF25	ID_14181	0	0.65	1.37	1.77
	1	C9ORF16	ID_14196	0	0.64	1.89	2.77
	1	C9ORF18	ID_14203	0	0.02	0.25	3.12
	1	LOC645469 /// LOC648	ID_14236	0	0.83	2.91	4.57
	1	LRRIQ1	ID_14254	0	-0.04	1.7	2.16
	1	DNM2	ID_14282	0	0.73	1.58	2.37
	1	PGA5 /// LOC643834 /	ID_14381	0	-0.09	0.13	2.11
	1	RP11-529I10.4	ID_14385	0	-0.1	0.91	1.4
	1	INPP4A	ID_14386	0	0.77	2.03	2.02
	1	INPP5B	ID_14402	0	0.08	1.01	1.36
	1	MAN1C1	ID_14409	0	-0.15	2.56	3.4
	1	SERINC5	ID_14474	0	0.39	0.89	1.23
	1	ACTR6	ID_14504	0	0.33	1.07	1.01
	1	BEXL1	ID_14527	0	0.61	1.13	1.88
	1	ABTB2	ID_14540	0	2.03	2.45	2.9
	1	ABTB1	ID_14542	0	0.81	1.32	2.08
	1	SFN	ID_14547	0	0.91	1.34	2.5
	1	PCMT1	ID_14554	0	0.19	0.83	1.07
	1	CRABP2	ID_14567	0	0.55	1.5	2.49
	1	TBC1D19	ID_14569	0	0.3	2.1	2.17
	1	TBC1D16	ID_14574	0	0.44	2.02	1.89
	1	TBC1D17	ID_14576	0	0.55	1.34	1.48
	1	TBC1D12	ID_14577	0	0.89	0.93	1.28
	1	LLGL2	ID_14629	0	0.32	1.51	1.83
	1	GUK1	ID_14657	0	0.27	1.07	1.56
	1	MGC59937 /// LOC6533	ID_14660	0	-0.57	0.53	2.47
	1	C9ORF72	ID_14664	0	0.42	1.49	2.45
	1	C9ORF75	ID_14665	0	1.1	1.49	2.07
	1	C9ORF116	ID_14675	0	0.94	2.74	2.97
	1	GARNL1	ID_14685	0	-0.1	0.35	0.91
	1	C9ORF80	ID_14716	0	0.3	1.54	1.44
	1	LOC123688	ID_14722	0	0.09	1.39	2.38
	1	GLRX5	ID_14726	0	0.73	1.6	1.53
	1	C9ORF53	ID_14730	0	-0.14	2.69	4.82
	1	C9ORF58	ID_14752	0	0	1.47	2.84
	1	LIPA	ID_14763	0	0.97	1.43	1.82
	1	FLJ44796	ID_14806	0	0.37	0.65	1.99
	1	ISG15	ID_14808	0	0.63	1.73	1.66
	1	ABAT	ID_14833	0	3.08	6.8	6.96
	1	DOK4	ID_14882	0	0.73	2.01	1.89
	1	ZMYND10	ID_14897	0	0.07	0.51	1.98
	1	DISP2	ID_14902	0	0.56	2.42	2.83
	1	MGC11257	ID_14921	0	0.04	1.06	1.39
	1	SYT11	ID_14958	0	0.78	2.04	2.18
	1	IER2	ID_14977	0	0.56	0.61	1.71
	1	SKAP2	ID_14980	0	0.62	2.19	3.02
	1	PRPF6	ID_14991	0	0.58	1.27	1.21
	1	ATPBD1C	ID_15005	0	0.47	1.71	1.84
	1	MED31	ID_15013	0	0.12	1.33	1.58
	1	RND2	ID_15036	0	0.54	1.23	2.37
	1	RND1	ID_15038	0	0.74	3.99	4.03
	1	C4ORF14	ID_15060	0	0.63	1.6	1.64
	1	C4ORF15	ID_15063	0	0.24	1.35	1.09
	1	ZBTB43	ID_15077	0	0.55	0.98	1.12
	1	RNF5	ID_15085	0	0.36	1.4	1.64
	1	GRK6	ID_15087	0	0.21	1.45	1.67
	1	TOLLIP	ID_15097	0	0.42	1.38	1.74
	1	LOH11CR2A	ID_15101	0	2.29	4.99	6.03
	1	C4ORF32	ID_15105	0	1.46	2.67	2.77
	1	GOLGA7	ID_15109	0	0.63	1.3	1.58
	1	C4ORF22	ID_15134	0	-0.01	0.76	2.18
	1	C4ORF24	ID_15149	0	2.29	3.32	3.61
	1	LOC340109	ID_15150	0	0.28	0.03	1.96
	1	CETN2	ID_15163	0	0.17	1.43	2.03
	1	FLJ35834	ID_15170	0	0.28	0.54	1.94
	1	PEX16	ID_15171	0	0.51	1.01	1.21
	1	C6ORF52	ID_15215	0	-0.07	1.66	2.55
	1	ALDH6A1	ID_15231	0	0.54	1.48	2.28
	1	GABARAPL1 /// GABARA	ID_15240	0	1.86	1.79	3
	1	GRAP	ID_15263	0	0.4	0.95	2.27
	1	GRB2	ID_15264	0	0.81	1.54	1.53
	1	CCDC23	ID_15302	0	-0.08	0.66	0.93
	1	C6ORF60	ID_15318	0	0.12	1.57	2.21
	1	IFI6	ID_15325	0	0.13	1.07	1.83
	1	NSBP1	ID_15336	0	0.24	0.55	1.18
	1	C6ORF96	ID_15341	0	-0.09	0.96	1.3
	1	CCDC52	ID_15368	0	0.94	1.41	1.75
	1	CCDC64	ID_15385	0	-0.07	0.43	1.02
	1	CCDC65	ID_15386	0	0	0.31	1
	1	CCDC69	ID_15403	0	1.07	1.94	2.02
	1	CCDC77	ID_15408	0	0.55	1.23	1.47
	1	LOC284926	ID_15425	0	0.25	1.12	1.25
	1	CLK3	ID_15429	0	0.15	0.88	1.12
	1	ITFG3	ID_15433	0	-0.09	0.78	1.04
	1	CGRRF1	ID_15436	0	0.8	1.04	1.36
	1	CCDC130	ID_15449	0	0.47	0.71	1.05
	1	ZNHIT1	ID_15454	0	-0.03	0.77	1.18
	1	ZNHIT4	ID_15456	0	0.78	1.23	1.79
	1	HIST2H2AA /// LOC653	ID_15457	0	-0.11	0.84	1.23
	1	CCDC98	ID_15462	0	0.04	0.87	1.21
	1	DYNLL2	ID_15501	0	0.61	2.28	2.56
	1	CLMN	ID_15513	0	0.68	2.51	3
	1	REPS2	ID_15529	0	0.73	2.35	2.28
	1	DPM1	ID_15549	0	0.51	1.17	1.31
	1	CHAC1	ID_15588	0	1.23	1.68	1.86
	1	NUDT6	ID_15591	0	1.28	2.87	2.66
	1	MGC13098 /// LOC6417	ID_15629	0	0.45	0.6	1.04
	1	AKR1C3	ID_15647	0	2.34	4.43	5.04
	1	AKR1C2	ID_15648	0	0.19	2.76	2.87
	1	CCDC104	ID_15651	0	-0.08	0.9	1.28
	1	AKR1C1	ID_15660	0	0.38	1.64	2.23
	1	ZFYVE27	ID_15671	0	0.69	0.74	1.3
	1	AAMP	ID_15675	0	0.15	1.33	1.26
	1	PAFAH1B3	ID_15709	0	0.36	1.26	1.06
	1	MTHFD2L	ID_15714	0	-0.28	0.06	0.79
	1	AKR1B1	ID_15733	0	-0.08	0.53	1.21
	1	LYPD6	ID_15749	0	1.15	2.08	2.17
	1	HEL308	ID_15752	0	0.12	0.93	1.01
	1	LOC388152 /// LOC388	ID_15784	0	1.12	1.62	1.99
	1	MRPL55	ID_15794	0	0.56	1.2	1.64
	1	ARFIP1	ID_15811	0	0.32	1.34	1.46
	1	DENND3	ID_15840	0	0.81	1.62	2.21
	1	UNQ501	ID_15872	0	0.31	1.12	1.85
	1	LGMN	ID_15883	0	1.28	2.46	2.66
	1	STARD4	ID_15891	0	0.97	1.56	2.36
	1	TNNT1	ID_15914	0	0.95	0.95	2.09
	1	ZFAND6	ID_15918	0	0.45	1.26	1.17
	1	TPP2	ID_15970	0	0.88	1.09	1.32
	1	DYNLT3	ID_15983	0	0.23	1.18	1.16
	1	DYNLT1	ID_15984	0	0.24	1.12	0.98
	1	PPP1R12B	ID_15993	0	0.27	0.59	1.25
	1	DDHD1	ID_16006	0	0.85	1.75	1.73
	1	TPMT	ID_16021	0	1.04	2.14	2.15
	1	PDHA1	ID_16043	0	0.32	0.96	1.09
	1	DUSP18	ID_16067	0	0.4	2.07	2.03
	1	CYP46A1	ID_16077	0	0.59	2.12	1.82
	1	DUSP23	ID_16080	0	0.11	1.26	1.54
	1	HBA2	ID_16084	0	0	0.46	3.83
	1	HBA1	ID_16085	0	-0.43	0.62	2.29
	1	PRPSAP2	ID_16087	0	0.58	1.29	1.49
	1	LOC220930	ID_16135	0	-0.28	0.12	2.89
	1	LOC338758	ID_16143	0	-0.05	0.2	1.62
	1	SDHA	ID_16147	0	0.23	1.03	1.13
	1	GNA15	ID_16164	0	0.08	0.18	1.03
	1	PACSIN1	ID_16173	0	0.05	1.22	1.23
	1	ANG /// RNASE4	ID_16194	0	0.7	1.98	3.01
	1	DKFZP762H185	ID_16197	0	3.06	4.12	4.62
	1	SSBP2	ID_16247	0	2.32	3.44	3.62
	1	RBP7	ID_16326	0	0.21	1.46	2.68
	1	ZFP41	ID_16372	0	0.89	1.45	2.07
	1	GPR160	ID_16373	0	0.22	3.32	3.79
	1	ZFP36	ID_16388	0	1.93	2.17	3.17
	1	VIL2	ID_16392	0	0.69	1.15	1.56
	1	COG3	ID_16415	0	-0.31	-0.03	0.96
	1	COG5	ID_16417	0	0.38	1.05	1.29
	1	COG2	ID_16428	0	0.26	0.77	1.11
	1	MKRN2	ID_16438	0	0.66	1.23	1.56
	1	MCOLN1	ID_16448	0	0.49	1.39	1.5
	1	PDGFD	ID_16451	0	0.4	1.7	2
	1	SREBF1	ID_16481	0	0.29	0.6	1.02
	1	C2ORF49	ID_16491	0	0.21	1.2	1.12
	1	DNAL4	ID_16497	0	0.62	1.95	2.23
	1	C2ORF31	ID_16519	0	2.45	2.95	3.43
	1	C16ORF45	ID_16523	0	1.35	2.65	2.55
	1	C16ORF57	ID_16548	0	0.72	2.27	2.17
	1	COPE	ID_16550	0	0.16	0.56	1.5
	1	GPR108	ID_16552	0	-0.09	0.21	1.55
	1	DNAH7	ID_16565	0	0.45	0.88	1.07
	1	SCOC	ID_16595	0	0.25	1.5	1.64
	1	C16ORF72	ID_16613	0	0.4	0.67	1.15
	1	LOC643837	ID_16622	0	0.87	1.92	1.74
	1	ERO1LB	ID_16628	0	0.24	1.72	1.73
	1	TNIK	ID_16633	0	0.65	1.26	1.32
	1	C16ORF61	ID_16635	0	0.36	1.03	0.87
	1	GNAI2	ID_16656	0	0.68	1.69	1.58
	1	CDADC1	ID_16674	0	0.18	1.05	0.99
	1	C22ORF27	ID_16701	0	0.56	1.12	1.47
	1	C22ORF23	ID_16705	0	-0.58	0.91	2.83
	1	C22ORF25	ID_16707	0	0.69	1.65	1.86
	1	PJA2	ID_16722	0	0.36	1.28	1.46
	1	CCDC109A	ID_16724	0	0.05	1.1	1.06
	1	CCL20	ID_16744	0	0	4.66	7.54
	1	SELM	ID_16756	0	0.17	0.8	1.22
	1	SELK	ID_16759	0	0.09	1.07	1.08
	1	RPS6KA5	ID_16772	0	0.91	2.06	1.9
	1	RPS6KA1	ID_16780	0	1.44	2.7	2.67
	1	RDM1	ID_16796	0	0.14	0.82	2.29
	1	GNB1L	ID_16799	0	0.73	1.92	1.8
	1	DOCK6	ID_16847	0	0.2	1.31	1.46
	1	HSD11B1L	ID_16862	0	0.12	1.14	1.6
	1	TRAIP	ID_16883	0	1.46	1.51	2.26
	1	ALDH3A2	ID_16884	0	0.24	1.97	2.19
	1	CBARA1	ID_16896	0	0.15	1.31	1.79
	1	DKFZP434I0714	ID_16933	0	0.1	0.19	2.42
	1	RSHL3	ID_16934	0	0.45	1.44	1.48
	1	RSHL2	ID_16935	0	0.34	1.44	1.66
	1	HOXA13	ID_16945	0	0.49	2.14	1.92
	1	PMS2L5 /// LOC441259	ID_16948	0	0.34	0.88	1.05
	1	PIN1	ID_16954	0	0.27	1.28	1.95
	1	GPD1L	ID_16955	0	0.18	1.8	2.15
	1	BMP6	ID_16981	0	0.64	1.82	1.68
	1	ANUBL1	ID_16984	0	0.7	2.02	2.77
	1	FLJ16423 /// LOC6429	ID_17016	0	0.33	0.15	1.56
	1	COX7A2L	ID_17017	0	0.35	1.07	1.37
	1	HBP1	ID_17019	0	0.48	0.84	1.19
	1	CNFN	ID_17031	0	0.03	0.6	2.28
	1	TP53INP2	ID_17034	0	0.22	1.43	1.79
	1	OSTBETA	ID_17055	0	0	0	1.26
	1	MFAP3L	ID_17063	0	0.36	3.33	3.43
	1	PIGH	ID_17081	0	0.65	1.98	2.41
	1	MOAP1	ID_17115	0	0.59	0.87	2.17
	1	CNN1	ID_17119	0	1.27	3	3.71
	1	KIF5C	ID_17163	0	2.93	4.98	5.83
	1	C1ORF88	ID_17180	0	-0.41	0.61	2.18
	1	RAB9	ID_17190	0	0.14	1.05	0.99
	1	LOC56757	ID_17214	0	0.53	1.3	2
	1	KIF3B	ID_17223	0	-0.03	0.99	1.36
	1	SERPINI1	ID_17227	0	2.67	4.5	5.36
	1	C1ORF66	ID_17234	0	-0.05	1.19	2.16
	1	SERPINA5	ID_17261	0	0	0.14	2.11
	1	CLIC4	ID_17286	0	0.09	1.02	1.26
	1	RALY	ID_17336	0	0.44	1.28	1.4
	1	HBS1L	ID_17340	0	-0.12	0.54	1.22
	1	AZGP1	ID_17342	0	0.56	0.9	2.3
	1	TUBG2	ID_17347	0	0.05	1.1	1.77
	1	C1ORF37	ID_17373	0	0.27	1.44	1.93
	1	PEX11B	ID_17464	0	0.15	0.88	1.07
	1	DSC1	ID_17467	0	0.04	0.88	1.06
	1	AOF1	ID_17470	0	1.18	2.92	3.33
	1	KIFAP3	ID_17480	0	-0.09	0.93	1.19
	1	LOC619208	ID_17511	0	0.28	1.61	2.58
	1	TERF2IP	ID_17529	0	0.49	0.67	1.13
	1	H2BFS	ID_17534	0	0.08	1.22	1.64
	1	CR1L	ID_17553	0	0	2.06	3.55
	1	MBOAT5	ID_17576	0	0.88	1.89	1.91
	1	LOC90835	ID_17579	0	1.36	2.02	3.09
	1	TUBA3	ID_17586	0	0.11	1.32	1.49
	1	TUBA1	ID_17587	0	0.59	2.27	2.43
	1	SETX	ID_17599	0	0.49	0.91	1.25
	1	ROBO1	ID_17605	0	0.44	0.88	1.15
	1	KATNB1	ID_17625	0	0.61	1.81	1.68
	1	RHOBTB2	ID_17631	0	-0.06	0.66	1.48
	1	LMTK2	ID_17632	0	0	0.06	1.2
	1	LMTK3	ID_17633	0	0.3	0.63	1.23
	1	PHF1	ID_17639	0	0.51	0.87	1.29
	1	SLAIN1	ID_17642	0	0	2.23	2.86
	1	RAP1A	ID_17643	0	0.24	1.08	1.12
	1	AGTPBP1	ID_17655	0	1.36	1.56	2
	1	MYCT1	ID_17675	0	0.59	2.95	4.53
	1	SIRT2	ID_17697	0	0.5	1.33	1.7
	1	SIRT3	ID_17698	0	0.78	1.52	1.47
	1	ACTR10	ID_17707	0	0.27	1.07	1.18
	1	INTS1	ID_17713	0	-0.04	0.44	0.99
	1	C14ORF1	ID_17719	0	0.6	1.25	1.19
	1	C14ORF2	ID_17720	0	-0.08	0.6	0.94
	1	INTS4	ID_17729	0	-0.14	0.42	1.07
	1	TLL2	ID_17775	0	-0.01	0	1.16
	1	RASSF8	ID_17785	0	0.15	0.65	1.2
	1	PFDN6	ID_17799	0	0.1	0.63	1
	1	C1QL1	ID_17802	0	1.15	1.58	2.84
	1	SGTA	ID_17828	0	1.05	0.98	1.82
	1	RBKS	ID_17864	0	0.03	1.27	1.95
	1	TNFAIP1	ID_17875	0	0.43	0.87	1.16
	1	OAZ2	ID_17881	0	0.69	1.54	1.44
	1	CPA4	ID_17889	0	0.53	1.93	3.06
	1	AFMID	ID_17917	0	0.64	1.41	1.59
	1	SGK3	ID_17936	0	0.6	2.03	2.13
	1	HAGH	ID_17938	0	0.21	1.39	1.07
	1	NGFRAP1L1	ID_17943	0	0.05	4.58	6.04
	1	LOC642540	ID_17945	0	0.01	0.16	1.13
	1	MYCBP	ID_17969	0	0.02	0.97	1.15
	1	SIN3B	ID_17996	0	0.53	0.86	1.12
	1	C12ORF60	ID_18010	0	1.97	3.6	4.13
	1	H2AFJ	ID_18011	0	0.57	1.33	2.25
	1	PGM2	ID_18013	0	0.12	1.07	0.99
	1	TALDO1	ID_18030	0	-0.07	0.95	1.26
	1	CKMT1A	ID_18046	0	0.36	0.51	1.25
	1	TM7SF2	ID_18049	0	1.63	3.43	4.06
	1	C12ORF31	ID_18055	0	0.06	0.79	1.07
	1	CGREF1	ID_18063	0	-0.2	0.92	2.33
	1	YPEL1	ID_18098	0	0.29	1.94	2.47
	1	YPEL4	ID_18099	0	0.01	0.01	1.01
	1	YPEL5	ID_18100	0	0.39	0.53	1
	1	YPEL2	ID_18103	0	2.12	2.61	3.36
	1	YPEL3	ID_18104	0	0.33	2.11	2.85
	1	C12ORF47	ID_18124	0	0.22	0.79	1.03
	1	C12ORF49	ID_18126	0	0.64	1.31	1.53
	1	SPSB3	ID_18139	0	1	1.67	1.94
	1	C12ORF34	ID_18156	0	0.84	2.94	3.94
	1	ANKRD49	ID_18159	0	0.12	1.02	1.37
	1	ANKRD57	ID_18177	0	0.78	1.31	1.34
	1	C12ORF11	ID_18208	0	-0.18	0.77	1.27
	1	NDRG4	ID_18211	0	0.02	3.17	3.6
	1	NDRG1	ID_18213	0	1.06	1.72	2.45
	1	TLN2	ID_18224	0	0.27	0.76	1.13
	1	DKFZP586P0123	ID_18227	0	0.09	0.85	1.23
	1	RPIB9	ID_18237	0	0.09	1.2	2.78
	1	NDUFB3	ID_18241	0	-0.12	0.74	1.06
	1	SBNO1	ID_18243	0	0.58	1.65	1.9
	1	NDUFA2	ID_18260	0	0.32	1.27	1.55
	1	NDUFA8	ID_18262	0	-0.1	0.92	1.26
	1	L2HGDH	ID_18277	0	1.07	2.25	2.68
	1	LOC130940	ID_18308	0	1.94	3.26	4.15
	1	OSTF1	ID_18316	0	0.05	1.08	1.25
	1	ASL	ID_18322	0	0.57	1.33	1.78
	1	RHOQ /// LOC284988	ID_18323	0	0.91	1.77	2.05
	1	RGS5	ID_18347	0	1.01	1.75	2.86
	1	RGS9	ID_18352	0	-0.02	1.58	2.88
	1	LRRC16	ID_18365	0	0.39	2.72	2.78
	1	LRRC15	ID_18366	0	2.58	3.28	3.92
	1	AUH	ID_18368	0	0.22	1.52	1.44
	1	GKAP1	ID_18370	0	1.42	2.04	2.4
	1	LRRC20	ID_18377	0	0.24	2.29	2.84
	1	LRRC28	ID_18388	0	0.8	2.33	2.83
	1	LRRC23	ID_18392	0	-0.46	1.69	3.61
	1	FLJ32065	ID_18431	0	0.01	0.57	1.26
	1	LRRC44	ID_18439	0	0.18	2.21	3.32
	1	LRRC46	ID_18443	0	0	0.98	2.19
	1	OTUB2	ID_18477	0	-0.26	1.6	2.57
	1	LRRC50	ID_18490	0	0.11	0.85	1.48
	1	OTUD1	ID_18509	0	0.83	1.4	2.14
	1	CSAD	ID_18523	0	-0.25	-0.13	1.03
	1	ACMSD	ID_18525	0	0.05	0.77	1.6
	1	IMPA2	ID_18534	0	1.99	4.14	4.71
	1	IMPA1	ID_18535	0	0.25	0.9	1.12
	1	LRRC8B	ID_18537	0	1.33	3.17	3.38
	1	PINK1	ID_18540	0	0.06	0.75	1.17
	1	HLA-DMB	ID_18541	0	1.26	1.84	4.39
	1	HLA-DMA	ID_18542	0	-0.27	0.19	1.77
	1	GGPS1	ID_18583	0	-0.18	0.78	1.31
	1	BSCL2 /// HNRPUL2	ID_18602	0	0.02	0.73	1.84
	1	CRIPT	ID_18635	0	0.48	1.9	2.42
	1	ADA	ID_18637	0	1.09	1.74	2.27
	1	CRIP2	ID_18651	0	0.44	4.4	4.62
	1	ZIK1	ID_18656	0	0.26	1.18	1.12
	1	ARRDC4	ID_18671	0	1.85	3.23	3.48
	1	PPP6C	ID_18685	0	0.09	0.95	1.01
	1	LOC497661	ID_18693	0	-0.21	1.06	1.83
	1	AGL	ID_18696	0	0.22	0.91	1.81
	1	MIR16	ID_18700	0	0.53	1.66	2.08
	1	BCKDHB	ID_18701	0	0.43	1.89	2.35
	1	DGCR6 /// DGCR6L	ID_18717	0	0.06	1.31	1.34
	1	LOC90624	ID_18729	0	0.18	1.18	1.29
	1	TRIM37	ID_18746	0	0	0.66	1.13
	1	TRIM36	ID_18750	0	2.61	3.38	3.84
	1	TRIM66	ID_18781	0	0.2	0.6	1.41
	1	RFX3	ID_18831	0	0.47	0.7	1.13
	1	RFX2	ID_18832	0	1.6	1.92	2.6
	1	AREG /// LOC653193	ID_18850	0	3.51	4.53	5.21
	1	FLJ20489	ID_18851	0	0.07	1.11	1.39
	1	TNFRSF9	ID_18881	0	2.71	2.92	4.77
	1	MAP3K1	ID_18900	0	0.23	1.03	0.9
	1	CDC2L6	ID_18904	0	0.33	1.18	1.26
	1	CRIM2	ID_18911	0	0.02	0.55	1.02
	1	LOC136288	ID_18918	0	4.98	6.78	7.54
	1	LOC642775	ID_18944	0	-0.14	-0.23	1.38
	1	MAP2K6	ID_18949	0	2.34	5.08	4.75
	1	ODC1	ID_18998	0	0.8	1.58	1.55
	1	LOC440957	ID_19001	0	0.95	1.95	2.11
	1	KLF13	ID_19004	0	0.8	1.22	1.43
	1	C21ORF91	ID_19011	0	1.84	2	2.45
	1	CENTB2	ID_19044	0	0.04	0.83	1.01
	1	CENTB5	ID_19046	0	0.08	1.02	1.2
	1	PEPD	ID_19055	0	0.44	1.27	1.68
	1	SIKE	ID_19070	0	0.2	1.2	1.35
	1	GUCY1B3	ID_19077	0	0.58	4.37	4.4
	1	C21ORF56	ID_19096	0	0.22	1.6	2.01
	1	TCEA2	ID_19107	0	0.74	2.41	3.36
	1	LOC642716	ID_19108	0	0.07	0.95	2.05
	1	LOC440992	ID_19115	0	0.72	3.18	3.38
	1	SILV	ID_19117	0	3.03	4.19	5.55
	1	TCEB2	ID_19124	0	-0.1	0.53	1.21
	1	MYEOV	ID_19157	0	0.25	0.13	1.08
	1	IDH3A	ID_19202	0	0.61	2.17	2.14
	1	ZKSCAN1	ID_19224	0	0.66	0.84	1.33
	1	RHOA	ID_19230	0	-0.16	0.48	1.32
	1	RHOB	ID_19231	0	1.64	2.46	2.94
	1	HIST3H2A	ID_19232	0	1.16	1.96	3.14
	1	POLG2	ID_19235	0	0.46	0.73	1.37
	1	LOC342979	ID_19240	0	0.01	1.77	2.29
	1	PADI2	ID_19246	0	0	0.61	1.22
	1	CALCOCO2	ID_19264	0	0.32	1.65	1.53
	1	CALCOCO1	ID_19267	0	1.11	2.09	2.95
	1	FUCA1	ID_19280	0	1.01	2.86	3.2
	1	HSDL2	ID_19287	0	0.3	2.05	2.52
	1	INSIG1	ID_19304	0	1.2	2.15	2.28
	1	SIAE	ID_19327	0	0.57	1.25	1.97
	1	LOC643201 /// LOC649	ID_19332	0	0	0.51	3.72
	1	CRYM	ID_19344	0	-0.59	1.28	3.2
	1	POLR2F	ID_19371	0	0.18	1.01	0.96
	1	POLR2E	ID_19372	0	0.25	1.02	1.17
	1	POLR2L	ID_19373	0	0.36	1.16	1.49
	1	RB1CC1	ID_19386	0	0.45	1.24	1.45
	1	BAIAP2L1	ID_19398	0	1.25	2.01	2.33
	1	IPO13	ID_19400	0	0.81	1.72	1.79
	1	PRPF18	ID_19405	0	0.34	1.58	1.72
	1	CSPG5	ID_19432	0	0.16	1.54	1.6
	1	KRTAP4-9	ID_19451	0	0.18	0.08	1.21
	1	CROT	ID_19458	0	0.17	1.05	0.85
	1	SAP18	ID_19481	0	0.24	1.16	1.21
	1	PIK3C3	ID_19551	0	0.59	1.02	1.18
	1	SH3GL3	ID_19561	0	1.95	4.36	4.29
	1	BNIP3	ID_19610	0	0.08	0.9	1.38
	1	NBEA	ID_19611	0	0.1	1.98	2.07
	1	MAP1LC3B	ID_19618	0	1.19	2	2.38
	1	EPB41L1	ID_19633	0	0.28	1.16	1.33
	1	PDK2	ID_19653	0	0.05	1.45	1.44
	1	PPHLN1	ID_19657	0	0.23	1.05	0.85
	1	PDK3	ID_19658	0	1.14	1.71	2.69
	1	PDK4	ID_19659	0	-0.01	0.68	1.12
	1	LOC90321	ID_19666	0	-0.12	0.96	1.73
	1	DNAJC1	ID_19690	0	0.93	1.35	1.51
	1	PDXP	ID_19698	0	0.78	2.02	1.92
	1	PEG10	ID_19730	0	0.34	2.47	4.04
	1	BPGM	ID_19751	0	0.71	2.2	2.72
	1	CDC14B	ID_19768	0	1.18	1.25	1.54
	1	ACOT7	ID_19776	0	0.22	1.82	2.28
	1	ACOT8	ID_19777	0	0.09	0.95	1.53
	1	PCDH9	ID_19782	0	2.8	3.23	3.81
	1	ETHE1	ID_19790	0	0.64	1.45	1.45
	1	KM-HN-1	ID_19797	0	0.77	2.66	3.29
	1	LRCH2	ID_19839	0	0.12	1.12	0.88
	1	FKSG24	ID_19841	0	1.92	3.57	3.59
	1	TGFA	ID_19871	0	0.2	0.37	1.33
	1	CARHSP1	ID_19885	0	0.43	1.63	1.56
	1	LOC143188	ID_19906	0	0.33	0.71	1.13
	1	STK38L	ID_19932	0	1.65	2.42	3.64
	1	ULK1	ID_19939	0	0.81	1.26	1.52
	1	DGAT2	ID_19960	0	0.47	0.46	1.18
	1	CABC1	ID_19972	0	1.03	1.92	2.49
	1	PIK3R3	ID_19975	0	1.01	2.54	3.16
	1	MAGI3	ID_20005	0	0.14	0.85	1.11
	1	PCLO	ID_20014	0	0.84	3.61	4.25
	1	GRB14	ID_20020	0	1.85	4.19	4.72
	1	NAGK	ID_20024	0	0.09	0.98	1.45
	1	CDC20B	ID_20041	0	1.56	2.24	4.01
	1	OCEL1	ID_20061	0	0.28	1.87	2.14
	1	PBXIP1	ID_20064	0	0.56	1.07	1.83
	1	RNASET2	ID_20093	0	0.58	1.05	1.3
	1	MIPEP	ID_20129	0	0.85	1.68	1.98
	1	PCTP	ID_20146	0	0.38	1.39	1.5
	1	PCMTD2	ID_20155	0	0.2	1.3	2.02
	1	TIMP4	ID_20160	0	0.32	0.88	3.42
	1	BIRC1 /// LOC648984	ID_20161	0	0.23	1.48	2.03
	1	PDE6D	ID_20168	0	0.4	1.77	1.93
	1	DHDDS	ID_20175	0	0.38	0.63	1.25
	1	GPR137C	ID_20181	0	1.53	2.56	2.91
	1	ZNF607 /// LOC653484	ID_20184	0	0.73	0.89	1.11
	1	CACNA1G	ID_20195	0	0.52	0.65	2.13
	1	NARS2	ID_20214	0	-0.06	0.75	1.03
	1	CTBS	ID_20218	0	0.23	0.73	1.51
	1	GAP43	ID_20225	0	-0.13	0.69	1.36
	1	HOOK2	ID_20281	0	1.01	2.09	2.17
	1	C11ORF32	ID_20299	0	0	0	1.29
	1	DHRS7B	ID_20301	0	-0.17	0.62	1.26
	1	ESCO2	ID_20304	0	0.85	1.46	1.7
	1	RFC5	ID_20305	0	-0.02	0.85	1.02
	1	RFC2	ID_20314	0	-0.17	0.16	0.85
	1	C11ORF24	ID_20316	0	0.39	0.86	1.63
	1	C11ORF65	ID_20322	0	0	0.4	2.6
	1	CTSL2	ID_20323	0	0.25	1.41	2.48
	1	GCNT3	ID_20326	0	-0.04	1.58	2.42
	1	SLC2A11	ID_20329	0	-0.06	-0.03	1.1
	1	GMCL1 /// GMCL1L	ID_20337	0	1.52	2.44	2.61
	1	LOC144363	ID_20348	0	0.47	1.46	2.58
	1	C11ORF54	ID_20353	0	0.61	1.35	2
	1	CSRP2	ID_20358	0	0.54	2.5	2.63
	1	NARF	ID_20385	0	0.79	2.06	2.01
	1	LOC158160	ID_20401	0	0.6	1.05	1.06
	1	NAT1	ID_20421	0	0.11	2.74	2.8
	1	STAT1	ID_20428	0	0.52	1.56	2.02
	1	STAT3	ID_20435	0	0.82	1.5	1.74
	1	PBX1	ID_20442	0	0.78	1.97	3.31
	1	NANS	ID_20458	0	0.3	1.69	1.62
	1	TFPI2	ID_20461	0	0.12	0.64	1.05
	1	PCCA	ID_20479	0	0.11	1.03	1.18
	1	MAP4K2	ID_20485	0	-0.06	0.78	1
	1	NAPA	ID_20487	0	0.61	1.56	2.1
	1	HECTD3	ID_20499	0	1.11	1.97	2.4
	1	SKIP	ID_20505	0	1.44	2.53	2.82
	1	KCTD17	ID_20525	0	0.06	1.07	1.86
	1	FLJ23577	ID_20539	0	0.32	1.41	1.78
	1	C11ORF67	ID_20552	0	1.18	2.69	3.27
	1	C11ORF71	ID_20569	0	-0.55	0.12	2.53
