# Supplementary material for: Systematic Analysis of Time-Series Gene Expression Data on Tumor Cell-Selective Apoptotic Responses to HDAC Inhibitors
Source: Comput Math Methods Med. 2014 Oct 13;2014:867289. doi: 10.1155/2014/867289 (PMC4211306; doi:10.1155/2014/867289)
Supplement: Supplementary file 1 — Table S1. H-score of all pathways for tumor and normal samples: This table lists the name, category, website and H-score values for all 1307 pathway. Table S2. Illustrative pathways belonging to term "No responding": This table lists the name, category, website and TVPC patterns for "No responding" pathways. Table S3. Illustrative pathways belonging to term "Consistent responding": This table lists the name, category, website and TVPC patterns for "Consistent responding" pathways. Table S4. Illustrative pathways belonging to term "Tumor specific responding": This table lists the name, category, website and TVPC patterns for "Tumor specific responding" pathways. Table S5. Illustrative pathways belonging to term "Normal specific responding": This table lists the name, category, web site and TVPC patterns for "Normal specific responding" pathways. Table S6. Illustrative pathways belonging to term "Divergent responding": This table lists the name, category, website and TVPC patterns for "Divergent responding" pathways. Table S7. Genes within profile #0 for normal samples: This table contains all genes within profile #0 for normal samples, and lists the normalized expression data to the right of gene symbol. Table S8. Genes within profile #2 for normal samples: This table contains all genes within profile #2 for normal samples, and lists the normalized expression data to the right of gene symbol. Table S9. Genes within profile #9 for normal samples: This table contains all genes within profile #9 for normal samples, and lists the normalized expression data to the right of gene symbol. Table S10. Genes within profile #12 for normal samples: This table contains all genes within profile # 12 for normal samples, and lists the normalized expression data to the right of gene symbol. Table S11. Genes within profile #14 for normal samples: This table contains all genes within profile #14 for normal samples, and lists the normalized expression data to the right of gene symbol. Ta [file 867289.f1.zip › 867289.f1/Table S16.xls]

## Sheet: Sheet1
Gene Table for Profile 14 (0.0,2.0,3.0,2.0) Tumor
Num. Genes Expected	Num. Genes Assigned	P-Value	Significant
701	308	1.6e-87	(significant)
-------
Selected	Weight	Gene Symbol	SPOT	0h	4h	12h	24h
	1	TMEFF2	ID_18	0	2.96	4.62	4.69
	1	BTBD5	ID_30	0	2.2	2.22	2.17
	1	ACAA1	ID_42	0	1.73	2.24	2.41
	1	GLA	ID_149	0	0.81	0.92	1.04
	1	CHKA /// LOC650122	ID_171	0	1.79	2.25	2.03
	1	ST8SIA4	ID_239	0	4.89	4.53	4.13
	1	ACAD8	ID_260	0	1.07	0.86	0.63
	1	NELF	ID_321	0	0.78	1.1	1.05
	1	NEK2	ID_348	0	0.39	1.16	0.62
	1	NEK1	ID_350	0	1.03	1.69	1.53
	1	PPAT	ID_353	0	0.55	1.24	0.94
	1	TM2D2	ID_371	0	0.92	1.28	0.77
	1	RASA4 /// FLJ21767	ID_425	0	4.05	4.04	3.59
	1	TEX2	ID_432	0	1.23	1.61	1.27
	1	FYN	ID_435	0	1.01	1.63	1.11
	1	PLEKHA8	ID_495	0	0.89	1.08	0.71
	1	CBFA2T2	ID_517	0	2.2	1.7	1.44
	1	PLEKHB2	ID_518	0	0.91	1.67	1.5
	1	FOS	ID_519	0	4.06	4.45	5.17
	1	TERT	ID_527	0	1.48	1.78	1.18
	1	HSPA12A	ID_638	0	2.33	2.64	2.37
	1	RANBP10	ID_648	0	1.21	1.72	1.7
	1	ARHGEF3	ID_670	0	1.35	3.68	2.57
	1	RGC32	ID_707	0	3.59	3.03	2.89
	1	EXPH5	ID_716	0	2.53	3.6	2.99
	1	LYSMD4	ID_757	0	1.63	2.44	2.3
	1	SMAP1L	ID_759	0	0.96	1.45	1.2
	1	CABLES2	ID_778	0	2.07	2.92	2.36
	1	IPMK	ID_780	0	0.85	1.02	1.09
	1	NR3C2	ID_802	0	2.75	3.1	3.1
	1	DACH1	ID_828	0	1.12	2.14	1.42
	1	ZRANB1	ID_832	0	0.53	1.1	0.96
	1	DEPDC7	ID_864	0	1.92	2.57	2.38
	1	TAF9B	ID_888	0	1.25	1.18	1.14
	1	C14ORF78	ID_890	0	2.31	2.69	2.15
	1	OPN3	ID_969	0	0.76	1.66	1.1
	1	KLHL7	ID_986	0	2.18	3.04	2.73
	1	IQCK	ID_1002	0	0.49	1.1	0.39
	1	ARNTL	ID_1004	0	2.12	3.24	3.22
	1	RP11-647M7.1	ID_1017	0	1.99	2.81	2.94
	1	AXIN2	ID_1031	0	1.22	1.79	1.56
	1	MEST	ID_1037	0	1.55	3.05	1.46
	1	PARD6A	ID_1041	0	1.97	2.27	2.09
	1	PARD6B	ID_1044	0	3.93	4.04	4.66
	1	GLS	ID_1053	0	1.02	1.1	0.95
	1	PARD6G	ID_1054	0	1	2.45	2.03
	1	PTPN1	ID_1055	0	1.76	1.87	1.85
	1	C14ORF92	ID_1077	0	0.66	1.13	1.1
	1	BAHD1	ID_1113	0	0.74	1.03	0.57
	1	SPTAN1	ID_1136	0	1.31	1.28	1.25
	1	IL17D	ID_1195	0	2.09	2.36	1.13
	1	DKFZP761P0423	ID_1236	0	2.23	2.73	1.67
	1	KIAA1946	ID_1242	0	1.13	1.43	1.48
	1	SORT1	ID_1256	0	1.3	1.41	1.34
	1	ARL4D	ID_1258	0	2.9	2.62	1.72
	1	ARL4C	ID_1259	0	1.83	1.67	1.3
	1	KIAA1958	ID_1266	0	1.7	2.49	2.28
	1	LOC652968	ID_1311	0	3.46	3.11	2.88
	1	FDFT1	ID_1324	0	0.86	1.54	1.35
	1	IDS	ID_1326	0	0.77	1.25	1.23
	1	MAPKAPK2	ID_1348	0	0.9	1.52	0.73
	1	TTYH2	ID_1363	0	0.72	1.9	1.43
	1	ABCB9	ID_1373	0	0.89	1.37	0.93
	1	LOC651423	ID_1434	0	1.42	1.49	1.52
	1	HIC2	ID_1438	0	1.42	1.2	0.98
	1	ID2	ID_1453	0	2.18	2.61	2.51
	1	RAB40C	ID_1488	0	0.88	1.34	0.74
	1	RAB40B	ID_1494	0	1.41	2.43	2.04
	1	SLC31A2	ID_1505	0	0.67	1.46	1.13
	1	SLC31A1	ID_1506	0	0.86	1.38	1.26
	1	HIP1	ID_1508	0	1.05	1.94	0.81
	1	CELSR2	ID_1515	0	1.3	2.23	1.85
	1	EPHA3	ID_1526	0	3.67	4.05	3.52
	1	PLXNA3	ID_1616	0	2.75	3.11	2.51
	1	IGFBP3	ID_1789	0	2.35	3.53	3.17
	1	PLEKHM1	ID_1800	0	1	1.43	1.05
	1	MGAT4A	ID_1868	0	3.31	3.73	3.76
	1	LOC57146	ID_1886	0	1.17	1.11	1.07
	1	PLEKHH2	ID_1909	0	3.1	3.79	4.22
	1	CPT1A	ID_1933	0	0.94	1.28	0.68
	1	ST3GAL5	ID_1955	0	2.19	2.77	2.45
	1	PSD3	ID_1972	0	1.17	1.61	1.69
	1	CYB5R1	ID_2021	0	1.37	1.97	2.03
	1	HMOX2	ID_2030	0	0.59	1	0.6
	1	ADRB2	ID_2040	0	3.3	2.73	2.41
	1	FLJ25416	ID_2082	0	0.8	1.39	1.25
	1	PFKFB4	ID_2117	0	1.37	1.89	1.38
	1	RBM38	ID_2202	0	0.98	1.46	0.79
	1	GALK2	ID_2214	0	1.66	1.66	1.62
	1	ABCD3	ID_2220	0	0.86	1.9	1.66
	1	IXL	ID_2280	0	0.76	1.64	1.45
	1	SGOL2	ID_2290	0	0.65	1.01	0.56
	1	C20ORF74	ID_2301	0	3.24	2.86	2.47
	1	COQ10A	ID_2358	0	1.18	2.04	1.93
	1	SLC6A8	ID_2468	0	1.58	1.57	1.29
	1	TARSL2	ID_2570	0	0.57	1.28	1.07
	1	USP20	ID_2597	0	2.49	2.85	2.52
	1	MIDN	ID_2608	0	1.35	1.4	1.6
	1	USP38	ID_2615	0	0.83	1.08	1.05
	1	USP37	ID_2616	0	0.65	1.2	1.1
	1	MARS2	ID_2617	0	1.08	1.63	1.36
	1	USP33	ID_2623	0	0.59	1.09	0.77
	1	PLSCR4	ID_2636	0	1.01	1.79	1.22
	1	FLJ90757	ID_2637	0	2.07	3.33	2.8
	1	MICB	ID_2653	0	1.58	2.41	2.11
	1	MICA	ID_2654	0	1.68	2.02	2.16
	1	GPR89A	ID_2664	0	2.05	1.75	1.35
	1	PKIB	ID_2667	0	0.44	1.73	1.05
	1	CD9	ID_2768	0	1.02	0.98	0.76
	1	CNNM4	ID_2788	0	1.2	2.53	2
	1	ISL2	ID_2800	0	2.19	2.6	2.67
	1	GBF1	ID_2828	0	0.49	1.37	1.08
	1	CAMK4	ID_2864	0	0.68	1.69	1.04
	1	FDX1	ID_2880	0	0.18	1.11	0.73
	1	FBXO3	ID_2894	0	1.4	2.06	1.78
	1	HSZFP36	ID_2926	0	1.35	1.52	1.54
	1	CHST12	ID_2943	0	0.97	1.27	0.57
	1	GBA2	ID_3018	0	0.82	1.35	1.3
	1	ATP6V0A1	ID_3021	0	1.36	1.36	1.52
	1	RCOR1	ID_3188	0	0.93	1.51	1.51
	1	MGC42105	ID_3212	0	1.79	3.09	1.86
	1	MAST3	ID_3245	0	1.93	2.92	2.85
	1	FLRT3	ID_3266	0	2.65	2.73	1.71
	1	CCNG1	ID_3339	0	0.22	1.12	0.79
	1	EXTL2	ID_3341	0	1.2	1.1	0.87
	1	TAF3	ID_3351	0	1.31	1.29	1.25
	1	HEY1	ID_3387	0	4.46	4.4	4.26
	1	AQP3	ID_3473	0	3.42	4.92	4.48
	1	HRSP12	ID_3485	0	0.39	1.56	1.21
	1	CGN	ID_3502	0	2.67	3.8	3.03
	1	RNU3IP2	ID_3503	0	1.1	1.88	0.89
	1	AKAP13	ID_3519	0	0.73	1.35	1.2
	1	TMOD2	ID_3556	0	0.39	2.11	1.26
	1	MITF	ID_3569	0	1.38	1.44	1.35
	1	ID2 /// ID2B	ID_3577	0	2.25	2.45	2.54
	1	RNF24	ID_3677	0	2.02	1.79	1.6
	1	ATP6V1B2	ID_3695	0	0.82	1.53	1.38
	1	HOXA1	ID_3698	0	1.92	3.69	3.24
	1	RNF13	ID_3721	0	0.9	1.21	1.19
	1	LOC653754	ID_3735	0	0.9	1.14	1.12
	1	CAMSAP1	ID_3774	0	0.71	1.05	0.97
	1	KIAA0513	ID_3806	0	3.37	3.68	3.71
	1	RNF41	ID_3850	0	1.34	1.87	1.67
	1	FLJ40432	ID_3896	0	1.77	2.6	2.28
	1	UNC119	ID_3900	0	1.3	1.62	0.95
	1	TAF13	ID_3938	0	0.39	1.52	1.16
	1	IL17RD	ID_3970	0	4.81	4.46	4.3
	1	TESK1	ID_3990	0	1.07	1.3	1.06
	1	FLJ13137	ID_4031	0	2.22	3.27	2.79
	1	MAD1L1	ID_4035	0	0.89	1.72	1.32
	1	PMM1	ID_4060	0	1.23	1.74	1.61
	1	GPSM2	ID_4098	0	0.89	1.34	1.04
	1	DMN	ID_4182	0	0.5	1.71	1.38
	1	ARSK	ID_4211	0	0.84	1.06	0.75
	1	SHOC2	ID_4212	0	0.93	1.31	1.03
	1	ASB6	ID_4310	0	0.95	1.64	1.53
	1	CORO2A	ID_4319	0	1.46	4.55	3.63
	1	CORO1A	ID_4332	0	3.34	5.61	4.43
	1	CHST2	ID_4360	0	0.75	1.24	0.83
	1	MFN1	ID_4370	0	0.45	1.19	0.97
	1	CHST7	ID_4371	0	1.04	1.05	0.9
	1	MAP1A	ID_4393	0	2.24	2.62	2.65
	1	MAP1S	ID_4400	0	1.29	1.06	0.88
	1	WDR79	ID_4422	0	0.52	1.34	0.94
	1	PCDH10	ID_4472	0	3.53	4.33	4.05
	1	NAP1L5	ID_4501	0	0.33	1.21	0.93
	1	WDR19	ID_4557	0	1.71	1.76	1.97
	1	MNAT1	ID_4578	0	0.64	1.31	0.94
	1	SLC2A8	ID_4598	0	0.6	1.49	0.88
	1	DDX48	ID_4659	0	0.87	1.62	1.21
	1	SAT1	ID_4703	0	1.75	2.75	2.39
	1	TBCCD1	ID_4707	0	0.95	1.95	1.76
	1	SAV1	ID_4749	0	1.27	1.42	0.98
	1	POLB	ID_4810	0	1.06	2.45	1.85
	1	LOC63929	ID_4840	0	0.57	1.06	0.84
	1	GCH1	ID_4882	0	2.65	3.6	3.62
	1	GRPEL1	ID_4911	0	0.59	1.03	0.38
	1	KIAA0746	ID_4915	0	1.67	2.22	1.16
	1	LYST	ID_4937	0	2.41	2.36	2.57
	1	ZNF778	ID_5063	0	1.43	1.78	1.74
	1	TAOK3	ID_5102	0	1.65	1.54	1.24
	1	ESRRG	ID_5104	0	2.57	3.71	3.2
	1	KIAA1377	ID_5116	0	0.55	1.74	1.38
	1	MEGF9	ID_5150	0	2.68	3.38	3.27
	1	CDKN2B	ID_5201	0	3.28	3.5	3.27
	1	CDKN2D	ID_5205	0	2.21	2.44	2.32
	1	EDG3	ID_5212	0	2.21	1.82	1.38
	1	LOC285812	ID_5273	0	2.38	2.73	2.73
	1	FBXO33	ID_5300	0	2.41	2.63	2.5
	1	STXBP1	ID_5339	0	0.8	1.91	1.45
	1	SNX11	ID_5359	0	0.58	1.22	0.77
	1	SNX30	ID_5402	0	1.28	1.21	1
	1	KIAA0247	ID_5448	0	1.79	1.4	1.08
	1	FAM64A	ID_5459	0	0.99	2.03	1.82
	1	CEP76	ID_5577	0	1.34	1.04	0.84
	1	NEDD9	ID_5641	0	2.33	3.09	2.81
	1	UBE2D1	ID_5653	0	1.04	1.46	1.1
	1	SERAC1	ID_5711	0	1.92	2.42	1.67
	1	ARHGAP26	ID_5731	0	3.25	3.6	3.73
	1	CEP55	ID_5750	0	0.45	1.27	0.92
	1	CEP68	ID_5770	0	1.31	1.38	1.17
	1	RHPN2	ID_5832	0	2.41	2.54	2.05
	1	C3ORF25	ID_5857	0	0.73	2.09	1.62
	1	GNAZ	ID_5871	0	0.58	1.93	0.95
	1	PI4KII	ID_5955	0	0.96	1.4	1.42
	1	DDIT4	ID_6018	0	0.84	1.24	0.4
	1	NCAM2	ID_6022	0	2.53	2.52	1.97
	1	ANKDD1A	ID_6062	0	0.98	1.54	1.48
	1	KIDINS220	ID_6119	0	0.75	1.32	1.04
	1	ULBP2	ID_6136	0	1.97	2.41	2.27
	1	FLJ31818	ID_6167	0	1.34	1.71	1.57
	1	IFT172	ID_6170	0	1.12	1.76	1.12
	1	C6ORF151	ID_6215	0	1.51	2.17	1.83
	1	C6ORF152	ID_6217	0	0.89	2.33	1.59
	1	MOCS1	ID_6263	0	0.59	1.17	0.79
	1	SPTLC2L	ID_6278	0	1.09	1.64	0.68
	1	SLC27A1	ID_6291	0	1.65	2.63	2.14
	1	SLC16A10	ID_6295	0	2.38	3.91	3.39
	1	MOSPD2	ID_6324	0	1.67	1.72	1.84
	1	MOSPD1	ID_6329	0	0.86	1.55	1.31
	1	PSCD1	ID_6357	0	2.06	2.05	1.7
	1	TTLL11	ID_6462	0	0.64	1.29	0.62
	1	C3ORF37	ID_6500	0	0.76	1.02	0.39
	1	C3ORF34	ID_6503	0	2.84	4.28	4.41
	1	KIAA1191	ID_6514	0	0.5	1.17	0.76
	1	C6ORF163	ID_6558	0	1.37	1.67	1.82
	1	ZNF510	ID_6667	0	1.64	1.57	1.38
	1	C19ORF28	ID_6683	0	0.76	1.24	0.59
	1	C19ORF25	ID_6688	0	0.75	1.08	0.79
	1	C19ORF22	ID_6692	0	0.31	1.13	0.76
	1	HRBL	ID_6705	0	0.53	1.98	1.36
	1	OSBPL11	ID_6786	0	0.28	1.02	0.79
	1	ZNF555	ID_6793	0	1.5	1.89	1.87
	1	C17ORF63	ID_6948	0	0.76	1.15	1.04
	1	AYTL1	ID_6985	0	0.79	1.47	1.15
	1	C17ORF80	ID_7012	0	0.69	1.15	0.7
	1	TMEM55B	ID_7018	0	0.76	1.56	1.21
	1	C1ORF128	ID_7103	0	1.34	1.43	1.68
	1	PPARA	ID_7135	0	1.02	1.76	0.79
	1	PPARD	ID_7137	0	0.66	1.3	0.83
	1	RBBP5	ID_7171	0	1.52	1.66	1.53
	1	SLC24A6	ID_7178	0	1.45	2.35	1.35
	1	RAB11FIP3	ID_7188	0	1.18	1.08	0.7
	1	RAB11FIP1	ID_7193	0	2.27	3.23	2.88
	1	KIF21B	ID_7210	0	1.17	2.36	2.17
	1	FAM84B	ID_7303	0	1.68	1.86	1.34
	1	KIAA0423	ID_7324	0	1.17	1.16	1.14
	1	MKL1	ID_7328	0	0.95	1.49	1.17
	1	PALLD	ID_7334	0	1.06	1.63	1.63
	1	GPRC5B	ID_7352	0	1.46	1.4	0.8
	1	ZNF600	ID_7357	0	1.28	1.18	0.84
	1	KIAA0404	ID_7375	0	1.62	3.34	3.05
	1	PHF20L1	ID_7377	0	0.84	1.11	0.67
	1	RP2	ID_7404	0	1.39	2.32	2.2
	1	ZNF57	ID_7405	0	1.81	2.21	1.54
	1	H1FX	ID_7408	0	1.32	1.76	1.81
	1	H1F0	ID_7429	0	2.35	2.89	2.77
	1	ZNF622	ID_7498	0	1.12	1.19	0.71
	1	TMEM41B	ID_7523	0	1.33	1.23	1.12
	1	ZNF10	ID_7535	0	1.58	1.95	1.53
	1	ZNF14	ID_7543	0	0.7	1.28	0.83
	1	MICAL2	ID_7563	0	0.93	1.36	0.58
	1	ZNF658	ID_7594	0	0.88	1.29	0.97
	1	ZNF20	ID_7635	0	0.51	1.07	0.33
	1	HLXB9	ID_7687	0	0.36	1.15	0.52
	1	ALAS1	ID_7731	0	1.54	1.4	1.12
	1	RTF1	ID_7737	0	0.5	1.14	0.73
	1	SLC9A3R1	ID_7748	0	2.4	3.81	3.49
	1	LPPR4	ID_7853	0	3.5	5.15	4.33
	1	PTPN13	ID_7880	0	1.22	1.41	1.52
	1	FAM73B	ID_7994	0	1.32	1.43	1.03
	1	CDKL5	ID_8011	0	2.39	2.69	2.73
	1	DIXDC1	ID_8027	0	2.79	2.76	2.27
	1	UNC84A	ID_8160	0	1.1	1.16	1.03
	1	LOC284371	ID_8196	0	0.44	1.14	0.73
	1	DUSP1	ID_8361	0	1.9	2.87	2.84
	1	CCM2	ID_8469	0	0.4	1.2	0.78
	1	ZNF313	ID_8477	0	1	1.32	1.31
	1	SLC45A4	ID_8502	0	1.77	1.82	1.07
	1	OSR2	ID_8513	0	1.72	1.76	1.47
	1	RNF128	ID_8551	0	2.84	4.05	3.23
	1	EHD1	ID_8555	0	1.09	1.4	0.92
	1	EHD4	ID_8559	0	0.5	1.03	0.34
	1	DKFZP434B0335	ID_8577	0	0.9	1.65	1.37
	1	STX12	ID_8638	0	0.88	1.91	1.73
	1	TSNAX	ID_8695	0	0.56	1.16	0.9
	1	PTCH1	ID_8787	0	1.95	1.78	1.12
	1	KIAA1706	ID_8831	0	3.17	2.75	2.55
	1	NRIP3	ID_8868	0	1.37	2.31	2.12
	1	LMBRD2	ID_8875	0	1.57	2.04	2.03
	1	TRIB2	ID_8901	0	0.85	1.53	0.57
	1	TXNIP	ID_8909	0	2.13	2.09	1.81
	1	KIAA1659	ID_8923	0	2.51	2.09	1.65
	1	FBXL14	ID_9036	0	1.71	1.96	1.48
	1	KIAA1622	ID_9071	0	2.66	3.28	3.22
	1	ZNF483	ID_9085	0	1.43	1.57	1.64
	1	ZNF468	ID_9091	0	1.07	2.04	1.67
	1	CRISPLD2	ID_9097	0	5.87	6.06	5.29
	1	CDO1	ID_9162	0	0.81	2.19	0.89
	1	ZNF439	ID_9165	0	1.47	1.66	0.9
	1	ZNF434	ID_9167	0	0.58	1.02	0.86
	1	AIM1L /// FLJ38020	ID_9171	0	1.11	2.69	2.07
	1	SESN2	ID_9187	0	2.24	1.89	1.6
	1	ZNF420	ID_9197	0	1.24	1.97	1.95
	1	LMCD1	ID_9205	0	3.32	4.41	4.09
	1	WIPI2	ID_9207	0	0.49	1.01	0.89
	1	LMBR1L	ID_9309	0	1.54	1.77	1.6
	1	RDH10	ID_9311	0	1.05	1.02	0.68
	1	RDH13	ID_9317	0	2.12	3.13	2.71
	1	ASPHD2	ID_9357	0	1.85	2.22	2.32
	1	DEXI	ID_9374	0	0.58	1.59	0.77
	1	ZYG11B	ID_9413	0	0.46	1.46	1.09
	1	CDS1	ID_9427	0	3.75	5.26	4.92
	1	LOC283378	ID_9453	0	0.83	0.94	1.02
	1	LSS	ID_9549	0	1.22	1.69	1.4
	1	RAP2A /// RAP2B	ID_9597	0	1.86	2.2	2.17
	1	KIAA1522	ID_9645	0	2.06	3.09	2.48
	1	TMEM110	ID_9705	0	0.45	1.36	1.07
	1	TMEM104	ID_9751	0	0.79	1.27	1.11
	1	PAPD5	ID_9762	0	1.36	1.49	1.06
	1	ZNF136	ID_9774	0	1.3	1.61	1.37
	1	SPTY2D1	ID_9796	0	1.29	1.42	1.56
	1	FABP3	ID_9873	0	2.01	1.91	1.13
	1	MAX	ID_9889	0	0.92	1.37	1.16
	1	PTGER2	ID_9913	0	2.3	2.56	1.99
	1	C7ORF46	ID_9995	0	0.9	2.56	1.88
	1	RAB20	ID_9996	0	1.95	1.8	1.54
	1	C7ORF30	ID_10004	0	0.27	1.01	0.66
	1	MMD	ID_10046	0	1.05	1.47	1.35
	1	HSPA1A /// HSPA1B	ID_10140	0	2.39	3.19	1.38
	1	RAB31	ID_10180	0	0.9	1.5	1.49
	1	CRYGS	ID_10197	0	2.33	2.09	2.05
	1	FNBP1L	ID_10244	0	2.1	2.2	1.92
	1	2014-09-06	ID_10250	0	2	2.43	2.16
	1	SEPX1	ID_10312	0	1.04	2.58	2.15
	1	NKIRAS1	ID_10365	0	1.11	1.64	1.48
	1	TMEM157	ID_10371	0	1.15	1.69	1.24
	1	TMEM34	ID_10386	0	0.76	1.27	1.06
	1	GLRX	ID_10391	0	1.43	1.82	1.4
	1	MAPK8IP1	ID_10431	0	1.77	2.33	2.42
	1	CITED4	ID_10448	0	0.71	1.4	0.32
	1	SPIRE1	ID_10478	0	0.73	1.46	1.18
	1	SPIRE2	ID_10479	0	1.07	1.2	1.14
	1	ZNF230	ID_10497	0	0.84	1.07	1.04
	1	ZNF222	ID_10511	0	0.73	1.43	0.94
	1	KIAA1411	ID_10556	0	0.95	1.07	0.97
	1	ATP7A /// LOC644732	ID_10564	0	0.92	1.58	1.46
	1	STX6	ID_10569	0	1.05	1.6	1.59
	1	KIAA1432	ID_10611	0	1.85	1.68	1.5
	1	DGKQ	ID_10636	0	0.97	2.23	1.76
	1	TSPAN9	ID_10687	0	0.99	1.64	1.31
	1	ZNF419A	ID_10822	0	0.39	1.07	0.89
	1	CBLB	ID_10915	0	1.06	1.07	1.06
	1	TULP3	ID_10916	0	0.51	1.61	1.12
	1	DKFZP761I2123	ID_10926	0	0.59	1.53	1.23
	1	ZFYVE1	ID_10948	0	0.92	1.46	0.99
	1	SUFU	ID_10982	0	1.22	1.9	1.82
	1	C14ORF129	ID_11006	0	1.93	2.69	2.35
	1	CBX4	ID_11014	0	1.85	2.07	1.6
	1	CBX2	ID_11017	0	1.54	2.78	1.97
	1	CHMP2B	ID_11063	0	0.52	1.1	0.65
	1	NXN	ID_11092	0	0.44	1.56	1.04
	1	MPP2	ID_11113	0	1.29	2.24	1.97
	1	LRRC1	ID_11196	0	1.55	1.84	1.56
	1	ARHGEF18	ID_11250	0	0.84	1.21	0.91
	1	TBXA2R	ID_11345	0	1.16	1.84	0.9
	1	JMJD2B	ID_11395	0	1.97	1.75	1.12
	1	ADARB1	ID_11397	0	0.69	1.18	0.58
	1	AVPI1	ID_11400	0	2.16	2.41	2.53
	1	TPST2	ID_11446	0	1.64	2.07	1.62
	1	C10ORF77	ID_11479	0	0.74	1.03	0.9
	1	CPEB4	ID_11502	0	1.93	2.04	1.47
	1	PDPK1	ID_11505	0	1.55	1.96	1.65
	1	C10ORF56	ID_11518	0	2.23	2.56	1.83
	1	FAM117A	ID_11545	0	2.74	3.17	3.55
	1	DKFZP434K1815	ID_11547	0	0.41	1.43	0.87
	1	JARID2	ID_11561	0	1.17	0.98	0.77
	1	SLC25A25	ID_11607	0	2.06	1.86	1.53
	1	SLC25A27	ID_11614	0	1.93	2.45	2.65
	1	LYPLA3	ID_11622	0	1.92	2.28	2.34
	1	FAM118A	ID_11623	0	2.25	2.31	2.23
	1	FAM118B	ID_11629	0	0.87	1.67	1.04
	1	SLC25A30	ID_11631	0	1.46	2.08	1.81
	1	SLU7	ID_11642	0	0.54	1.15	0.98
	1	SSX2IP	ID_11665	0	0.75	1.12	0.91
	1	SLC25A19	ID_11689	0	0.5	1.52	0.94
	1	XPA	ID_11733	0	0.37	1.12	0.82
	1	HS6ST1	ID_11760	0	1.72	2.29	1.45
	1	SLC25A44	ID_11761	0	1.15	1.58	1.52
	1	SLC25A42	ID_11762	0	0.99	2.16	0.93
	1	PGPEP1	ID_11784	0	0.95	1.14	0.87
	1	HSMPP8	ID_11924	0	1.08	0.93	0.67
	1	ACOX3	ID_11973	0	0.65	1.03	0.91
	1	TSPAN12	ID_11976	0	2.09	2.13	2.01
	1	FAM120B	ID_12000	0	0.28	1.19	0.91
	1	PPM1B	ID_12011	0	1.15	1.43	1.58
	1	PVRL2 /// LOC643722	ID_12068	0	1.5	1.28	0.99
	1	ADD3	ID_12093	0	0.9	1.43	1.21
	1	FAM122B	ID_12100	0	0.38	1.35	0.92
	1	SLC15A2	ID_12136	0	2.61	3.48	3.47
	1	TFIP11	ID_12157	0	0.29	1.1	0.53
	1	FAM45A	ID_12164	0	0.67	1.08	0.44
	1	ORMDL3	ID_12167	0	0.86	1.01	1.13
	1	FAM46A	ID_12172	0	1.92	1.91	1.66
	1	FAM46C	ID_12175	0	4.28	5.22	5.11
	1	FAM46B	ID_12177	0	2.26	2.92	3.05
	1	DKFZP761M1511	ID_12208	0	1.4	4.09	2.82
	1	FAM126A	ID_12218	0	1.18	1.05	0.92
	1	WFS1	ID_12220	0	1.39	2.38	1.97
	1	PAG1	ID_12237	0	2.21	1.89	1.45
	1	MUM1	ID_12274	0	1.07	0.98	0.58
	1	ENO2	ID_12343	0	0.72	1.26	1.15
	1	ACPL2	ID_12353	0	1.96	3.46	2.85
	1	MYLIP	ID_12362	0	3.36	3.35	3.65
	1	GOLPH3L	ID_12394	0	0.85	1.33	0.77
	1	LZTS1	ID_12415	0	0.9	2.43	1.79
	1	ST6GALNAC4	ID_12430	0	0.63	1.31	0.85
	1	PRSS35	ID_12437	0	2.21	3.25	2.98
	1	GFOD1	ID_12438	0	1.59	2.22	2.07
	1	SH3PXD2B	ID_12441	0	2.15	2.67	2.34
	1	UBE2S /// LOC651816	ID_12449	0	0.28	1.45	0.94
	1	LOH3CR2A	ID_12466	0	1.95	3.04	1.46
	1	MTUS1	ID_12530	0	1.66	2.98	2.77
	1	XRRA1	ID_12541	0	1.54	2.08	1.98
	1	CYP2U1	ID_12621	0	0.94	1.13	1.17
	1	CHKA	ID_12670	0	1.75	2.29	2.24
	1	AGPAT4	ID_12708	0	1.74	1.7	1.18
	1	FKBP14	ID_12722	0	1.41	1.56	1.27
	1	BCL6	ID_12764	0	1.91	1.8	1.92
	1	TOM1L2	ID_12778	0	1.82	2.02	1.89
	1	ACSS2	ID_12785	0	1.06	1.74	1.64
	1	BCHE	ID_12828	0	0.9	1.3	0.69
	1	KLHL26	ID_12855	0	3.07	3.17	2.53
	1	KLHL25	ID_12858	0	0.48	1.46	1.07
	1	UBE2F	ID_12874	0	0.39	1.12	0.73
	1	PRKD2	ID_12888	0	0.61	1.12	0.94
	1	MTM1	ID_12919	0	1.41	2.48	2.15
	1	FNBP1	ID_12995	0	0.73	1.13	0.48
	1	FLJ46419 /// LOC6420	ID_13031	0	0.31	1.44	1.08
	1	KCNG1	ID_13032	0	1.23	1.98	0.83
	1	ZBTB9	ID_13077	0	0.92	1.33	1.33
	1	ELOVL4	ID_13155	0	2.08	1.99	2.08
	1	TTBK2	ID_13210	0	1.46	1.66	1.85
	1	NFIL3	ID_13240	0	2.13	2.47	2.15
	1	ENPP1	ID_13342	0	0.77	1.19	1.15
	1	ELOF1	ID_13373	0	0.79	1.84	1.55
	1	ZCCHC14	ID_13389	0	2	2.29	2.37
	1	THAP10	ID_13487	0	0.92	1.45	1.13
	1	FAM109A	ID_13521	0	1.17	1.39	0.96
	1	FAM107B	ID_13543	0	1.51	1.92	1.04
	1	SLC17A5	ID_13568	0	2.01	1.95	1.87
	1	SETD3	ID_13584	0	0.87	1.62	1.45
	1	ALDH8A1	ID_13588	0	1.17	1.63	1.12
	1	KBTBD8	ID_13634	0	2.06	2.01	1.83
	1	KBTBD9	ID_13636	0	1.95	2.52	2.68
	1	TMEM57 /// RP11-308B	ID_13638	0	0.53	1.27	0.98
	1	SPP1	ID_13640	0	1.76	1.55	0.94
	1	ELMO2	ID_13693	0	0.61	1.37	1.19
	1	SNAP29	ID_13703	0	0.7	1.72	1.39
	1	MKNK2	ID_13704	0	1.57	2.35	2.03
	1	MKNK1	ID_13705	0	2.07	2.61	2.87
	1	SNAP23	ID_13717	0	0.36	1.17	0.9
	1	TFDP2	ID_13786	0	0.53	1.21	1.07
	1	UBAP2	ID_13831	0	0.49	1.03	0.63
	1	TRFP	ID_13856	0	0.44	1.18	0.83
	1	DLX2	ID_13910	0	1.96	2.23	2.03
	1	SNAG1	ID_13942	0	0.81	1.44	1.07
	1	TTN	ID_13975	0	1.19	1.55	1.6
	1	CYLN2	ID_13983	0	1.03	2.02	1.56
	1	IGSF9	ID_14002	0	2.13	2.78	2.16
	1	NKX3-1	ID_14015	0	1.87	2.04	1.84
	1	KCTD9	ID_14032	0	0.72	1.01	0.52
	1	FLJ21908	ID_14053	0	0.5	1.25	0.7
	1	OXNAD1	ID_14075	0	0.92	1.83	1.57
	1	MGC10334	ID_14087	0	1.19	1.52	1.2
	1	TUBB2A	ID_14129	0	2.05	2.77	2.15
	1	C9ORF19	ID_14202	0	1.57	3.26	2.95
	1	SRGAP2	ID_14251	0	0.76	1.29	1.05
	1	GRHL1	ID_14305	0	4.72	5.33	4.69
	1	ARID5A	ID_14377	0	1.19	1.31	1.09
	1	MAN1A1	ID_14380	0	0.93	1.88	1.71
	1	TOR1B	ID_14398	0	0.99	1.24	1.21
	1	INPP5F	ID_14399	0	1.8	2.71	2.38
	1	INPP5A	ID_14403	0	0.79	2.04	1.63
	1	RAB6IP2 /// LOC65315	ID_14419	0	0.55	1.12	0.72
	1	RAPGEF2	ID_14441	0	0.73	1.01	0.95
	1	ACTR5	ID_14505	0	0.27	1.27	0.85
	1	SNAPC1	ID_14513	0	1.19	1.67	1.11
	1	MYO6	ID_14586	0	0.7	1.07	0.91
	1	C22ORF5	ID_14597	0	0.54	1.27	0.92
	1	C22ORF9	ID_14598	0	0.92	2.02	1.59
	1	C9ORF140	ID_14646	0	1.25	2.02	1.07
	1	TBC1D24	ID_14648	0	1.14	1.98	1.51
	1	TBC1D20	ID_14655	0	0.75	1.58	1.31
	1	C9ORF77	ID_14667	0	1.23	1.53	1.68
	1	C9ORF78	ID_14672	0	1	1.55	1.3
	1	C9ORF119	ID_14677	0	0.27	1.22	0.82
	1	C9ORF89	ID_14704	0	0.83	1.42	1.08
	1	SEPT6 /// N-PAC	ID_14720	0	1.33	2.34	1.99
	1	SNN	ID_14737	0	2.76	2.33	1.96
	1	CRSP7	ID_14767	0	1.76	2.16	1.65
	1	LIFR	ID_14818	0	2.61	2.98	2.56
	1	MED19	ID_14831	0	0.55	1.28	0.9
	1	CMIP	ID_14834	0	0.72	1.32	0.83
	1	DISP1	ID_14904	0	1.18	1.1	1.16
	1	ASF1B	ID_14956	0	1	1.59	1.06
	1	DENND4A	ID_15017	0	0.91	1.39	1.09
	1	EPOR	ID_15018	0	1.13	1.38	1.35
	1	F11R	ID_15028	0	2.77	2.8	2.59
	1	BCR /// LOC644165 //	ID_15045	0	0.7	1.58	1.01
	1	C4ORF16	ID_15064	0	1.06	1.18	1.28
	1	ZBTB48	ID_15069	0	1.88	2.47	2.03
	1	GRK5	ID_15089	0	1.47	1.9	1.44
	1	C4ORF31	ID_15106	0	0.28	1.47	0.81
	1	C4ORF28	ID_15154	0	0.69	1.06	0.91
	1	PEX13	ID_15173	0	0.4	1.01	0.75
	1	TUFT1	ID_15195	0	3.39	3.23	3.27
	1	TNFAIP8L1	ID_15259	0	1.46	2.26	1.95
	1	CCDC32	ID_15319	0	1.39	1.56	1.45
	1	CCDC46	ID_15354	0	0.61	1.32	0.79
	1	PROSC	ID_15355	0	0.37	1.14	0.89
	1	CCDC68	ID_15404	0	1.26	2.42	2.21
	1	CCDC75	ID_15410	0	1.26	1.87	1.79
	1	MXI1	ID_15426	0	2.39	2.85	3.12
	1	CCDC96	ID_15460	0	1.72	2.82	1.08
	1	CCDC92	ID_15464	0	0.79	1.95	1.28
	1	CCDC82	ID_15486	0	0.51	1.3	0.86
	1	MXD1	ID_15517	0	3.12	2.99	2.96
	1	CHTF18	ID_15550	0	0.7	1.22	1.04
	1	DOPEY2	ID_15620	0	0.65	2.01	1.49
	1	DOPEY1	ID_15621	0	1.07	1.05	1.03
	1	TUBB2A /// TUBB2B	ID_15630	0	0.9	2.25	1.5
	1	TSC22D1	ID_15693	0	0.88	1.13	1.12
	1	CCDC112	ID_15722	0	2.19	2.36	2.42
	1	ARFIP2	ID_15805	0	0.3	1.26	0.88
	1	EPS8	ID_15818	0	1.16	1.6	1.36
	1	WASF1	ID_15824	0	0.28	1.04	0.7
	1	STARD5	ID_15889	0	2.09	2.83	2.32
	1	B3GNT2	ID_15944	0	1.56	1.61	1.5
	1	PPP1R12C	ID_15994	0	1.03	1.23	1.26
	1	PPP1R13B	ID_16036	0	1.02	1.29	1.23
	1	TRAFD1	ID_16098	0	1.88	2.51	2.38
	1	FLJ20920	ID_16102	0	0.97	1.5	1.33
	1	EVI5	ID_16104	0	0.67	1.33	1.01
	1	ABHD6	ID_16122	0	1.73	1.46	1.11
	1	HOM-TES-103	ID_16132	0	1.15	0.97	0.93
	1	GNA11	ID_16165	0	0.55	1.65	1.16
	1	PACSIN2	ID_16175	0	0.83	1.05	1.06
	1	MGC39606 /// LOC6445	ID_16184	0	3.92	5.35	5.3
	1	PELI3	ID_16300	0	1.26	1.61	1.43
	1	GPR135	ID_16304	0	3.84	4.16	4.88
	1	STK17B	ID_16333	0	1.21	1.87	1.3
	1	STK17A	ID_16337	0	1	1.46	1.01
	1	GPR155	ID_16351	0	1.86	2.72	2.69
	1	PELI1	ID_16354	0	2.16	2.12	2.17
	1	OASL	ID_16366	0	2.81	2.59	1.8
	1	MCOLN2	ID_16452	0	1.86	1.9	1.22
	1	PPTC7	ID_16480	0	0.87	1.03	0.74
	1	SLC4A11	ID_16487	0	1.5	1.42	0.88
	1	C2ORF44	ID_16489	0	1.15	2.01	1.82
	1	C16ORF46	ID_16525	0	0.6	1.24	1.02
	1	C16ORF55	ID_16545	0	1.15	1.93	1.56
	1	ALS2	ID_16610	0	1.16	1.28	1.41
	1	C16ORF76	ID_16618	0	0.97	1.71	1.64
	1	GNAI1	ID_16659	0	0.51	1.23	0.96
	1	C16ORF80	ID_16683	0	1.09	1.55	0.94
	1	RPS6KB1	ID_16791	0	0.47	1.06	0.34
	1	DDEFL1	ID_16893	0	0.74	2.07	1.7
	1	ALAD	ID_16906	0	2.03	3.05	3.06
	1	EFNA3	ID_16913	0	1.39	2.87	2.07
	1	EFNB2	ID_16923	0	2.16	1.85	1.76
	1	PIM1	ID_16926	0	0.68	1.7	1.31
	1	PIM2	ID_16928	0	1.25	1.68	1.44
	1	EFNA4	ID_16943	0	2.75	2.52	1.43
	1	TP53INP1	ID_17037	0	0.37	1.68	0.99
	1	TOB1	ID_17038	0	1.55	1.3	0.92
	1	MAP6D1	ID_17054	0	0.55	1.01	0.29
	1	PIGA	ID_17089	0	0.84	1.01	0.9
	1	PPP2R5B	ID_17140	0	0.33	1.1	0.84
	1	C1ORF55	ID_17194	0	1.39	1.85	1.64
	1	C1ORF50	ID_17202	0	0.51	1.72	1.37
	1	C1ORF52	ID_17210	0	0.97	1.07	1.18
	1	KIF3A	ID_17224	0	1.7	2.15	2.13
	1	KIF3C	ID_17228	0	0.32	1.07	0.75
	1	C1ORF63	ID_17239	0	1.48	1.24	1.15
	1	BTBD11	ID_17248	0	0.8	2.03	1.7
	1	RAP2A	ID_17271	0	1.48	1.97	1.65
	1	FLJ12986	ID_17279	0	1.5	1.36	1.34
	1	EEF1G	ID_17294	0	1.05	1.07	1.18
	1	C1ORF96	ID_17318	0	1.7	1.63	1.49
	1	C1ORF38	ID_17366	0	3.67	4.39	4.03
	1	KIF1B	ID_17419	0	0.71	1.1	0.58
	1	FARP2	ID_17490	0	1.94	1.81	1.63
	1	SSBP3 /// LOC641972	ID_17515	0	1.2	1.7	0.93
	1	YWHAG	ID_17572	0	0.37	1.06	0.83
	1	LOC90826	ID_17596	0	0.71	1.33	0.87
	1	RSC1A1	ID_17650	0	0.67	1.1	0.98
	1	SIRT4	ID_17692	0	1.07	4.13	3.11
	1	SH3BP5	ID_17699	0	1.01	1.47	1.04
	1	PPP1R3C	ID_17761	0	2.07	2.66	2.88
	1	MAP2K3 /// LOC651423	ID_17767	0	1.52	1.46	1.54
	1	RASSF7	ID_17786	0	1.17	1.03	0.93
	1	GALNT12	ID_17817	0	0.81	2.67	1.76
	1	HSD17B7	ID_17819	0	0.45	1.29	0.71
	1	SWAP70	ID_17824	0	0.53	1.35	1.14
	1	RASSF4	ID_17830	0	1.43	1.6	0.92
	1	RASSF5	ID_17831	0	3.04	2.8	1.96
	1	TNFAIP8	ID_17869	0	1.1	1.73	1.68
	1	C12ORF22	ID_18076	0	1.15	1.7	1.5
	1	ANKRD27	ID_18079	0	0.79	1	0.71
	1	PRUNE	ID_18083	0	0.66	1.92	1.59
	1	C12ORF52	ID_18109	0	0.75	1.16	0.56
	1	C12ORF45	ID_18119	0	0.45	1.3	0.68
	1	C12ORF44	ID_18145	0	1.42	1.71	1.56
	1	ANKRD46	ID_18158	0	1.93	2.54	2.61
	1	ARC	ID_18297	0	0.99	1.01	0.56
	1	RGS2	ID_18344	0	3.42	4.38	3.9
	1	TRIM23	ID_18454	0	1.14	1.65	1.31
	1	RGL1	ID_18478	0	3.08	3.77	3.77
	1	MTRF1L /// LOC285442	ID_18501	0	0.88	1.17	1.1
	1	SHQ1	ID_18577	0	0.66	1.34	1.08
	1	LOC91661	ID_18579	0	0.93	1.97	1.64
	1	TSEN54	ID_18645	0	1.64	1.71	1.78
	1	ARRDC1	ID_18674	0	0.88	1.62	0.68
	1	PRIC285	ID_18680	0	1.32	1.51	0.9
	1	ADC	ID_18684	0	2	2.11	1.68
	1	AHR	ID_18742	0	1.91	2.32	1.9
	1	RPAIN	ID_18752	0	0.36	1.11	0.77
	1	TRIM73	ID_18776	0	2.26	2.93	2.2
	1	TRIM62	ID_18819	0	2.04	2.14	1.68
	1	DGCR2	ID_18852	0	0.61	1.18	0.84
	1	SUHW3	ID_18858	0	1.57	1.18	0.85
	1	MAP3K3	ID_18896	0	0.79	1.69	1.39
	1	LOC90693	ID_18929	0	1.83	2.25	2.06
	1	HSPA1A	ID_18977	0	1.78	2.37	1.21
	1	ATG4B /// LOC653202	ID_19016	0	1.13	1.29	1.3
	1	SLC9A1	ID_19030	0	1.45	2.38	1.48
	1	C21ORF86	ID_19031	0	1.84	1.6	1.33
	1	DGCR13	ID_19042	0	1.76	2.92	2.72
	1	DGCR14	ID_19043	0	0.79	1.64	1.34
	1	LOC642730	ID_19045	0	1.01	1.09	0.74
	1	NPY1R	ID_19118	0	3.24	3.41	2.84
	1	NCLN	ID_19137	0	0.49	1.42	1.09
	1	EPAS1	ID_19194	0	0.94	1.92	1.64
	1	NOSIP	ID_19206	0	1.03	2.46	1.85
	1	RHOQ	ID_19222	0	0.65	1.16	0.88
	1	PEX3	ID_19225	0	0.54	1.02	0.78
	1	PEX1	ID_19229	0	0.59	1.14	0.82
	1	NCOA7	ID_19245	0	1.03	1.46	1.27
	1	NCOA3	ID_19256	0	1.52	1.77	1.59
	1	HYPE	ID_19265	0	1.44	1.3	0.79
	1	TSEN34	ID_19274	0	0.35	1.15	0.62
	1	IFIT1	ID_19284	0	0.68	1.26	0.35
	1	CRY1	ID_19308	0	1.13	1.42	1.02
	1	HTATSF1	ID_19328	0	0.31	1.08	0.82
	1	POLR3K	ID_19397	0	0.42	1.09	0.41
	1	BAMBI	ID_19420	0	3.49	4.38	4.48
	1	LOC642705	ID_19424	0	1.31	1.06	0.89
	1	RRM2B	ID_19466	0	0.61	1.42	1.25
	1	SAP30	ID_19491	0	1.41	1.79	1.68
	1	LOC642852	ID_19580	0	2.02	2.02	1.7
	1	PHKG2	ID_19626	0	1.05	1.14	0.53
	1	EPB41L5	ID_19636	0	1.78	2.85	2.64
	1	OGG1	ID_19669	0	0.35	1.33	0.84
	1	DNAJC6	ID_19685	0	2.02	2.83	2.07
	1	TCFL5	ID_19706	0	1	1.82	1.49
	1	PTRH1	ID_19717	0	0.38	1.17	0.84
	1	DNAJB1	ID_19761	0	1.57	2.88	1.71
	1	LUZP1	ID_19818	0	1.48	1.58	1.12
	1	FANCM	ID_19866	0	1.41	1.27	1.31
	1	PMAIP1	ID_19901	0	1.38	1.11	1
	1	ULK4	ID_19927	0	2.13	1.7	1.43
	1	GZF1	ID_19955	0	1.57	1.41	1.25
	1	TGM2	ID_19967	0	1.03	1.63	1.31
	1	PIK3R1	ID_19980	0	1.11	1.05	1.09
	1	CTGF	ID_20001	0	2.3	3.14	3.01
	1	MAGI1	ID_20007	0	1.05	0.87	0.72
	1	NAGS	ID_20023	0	0.6	1.14	0.99
	1	HEBP1	ID_20047	0	0.4	1.67	1.22
	1	MARCKSL1	ID_20057	0	0.79	2.44	1.07
	1	HSPC049	ID_20085	0	0.89	1.17	0.65
	1	LOC401022	ID_20088	0	0.15	1.11	0.73
	1	CTNS	ID_20120	0	1.55	1.37	0.87
	1	SLC7A5	ID_20133	0	1.35	1.75	0.91
	1	GCOM1	ID_20137	0	1.81	2.53	2.26
	1	DYRK3	ID_20172	0	1.72	1.38	0.94
	1	GPR137B	ID_20180	0	1.16	1.34	0.67
	1	GDPD1	ID_20262	0	2.48	3.61	3.58
	1	OCLN /// LOC647859 /	ID_20280	0	1.05	1.36	0.65
	1	SLC2A12	ID_20318	0	1.24	2.96	2.42
	1	SLC2A13	ID_20321	0	0.48	1.59	1.24
	1	C11ORF56	ID_20346	0	0.86	1.58	1.38
	1	CSRP1	ID_20357	0	0.4	1.16	0.88
	1	DNAJC12	ID_20387	0	2.53	3.87	3.05
	1	FZD4	ID_20431	0	2.22	2.53	2.66
	1	STAT2	ID_20438	0	0.71	1.11	0.93
	1	PBX4	ID_20446	0	2.62	2.47	2.54
	1	CTR9	ID_20520	0	0.93	1.42	1.2
	1	CPNE3	ID_20529	0	0.54	1.55	1.11
	1	FLJ23569	ID_20555	0	1.06	1.01	0.88
	1	FLJ20152	ID_20605	0	2.73	2.76	2.64
