# Supplementary material for: Systematic Analysis of Time-Series Gene Expression Data on Tumor Cell-Selective Apoptotic Responses to HDAC Inhibitors
Source: Comput Math Methods Med. 2014 Oct 13;2014:867289. doi: 10.1155/2014/867289 (PMC4211306; doi:10.1155/2014/867289)
Supplement: Supplementary file 1 — Table S1. H-score of all pathways for tumor and normal samples: This table lists the name, category, website and H-score values for all 1307 pathway. Table S2. Illustrative pathways belonging to term "No responding": This table lists the name, category, website and TVPC patterns for "No responding" pathways. Table S3. Illustrative pathways belonging to term "Consistent responding": This table lists the name, category, website and TVPC patterns for "Consistent responding" pathways. Table S4. Illustrative pathways belonging to term "Tumor specific responding": This table lists the name, category, website and TVPC patterns for "Tumor specific responding" pathways. Table S5. Illustrative pathways belonging to term "Normal specific responding": This table lists the name, category, web site and TVPC patterns for "Normal specific responding" pathways. Table S6. Illustrative pathways belonging to term "Divergent responding": This table lists the name, category, website and TVPC patterns for "Divergent responding" pathways. Table S7. Genes within profile #0 for normal samples: This table contains all genes within profile #0 for normal samples, and lists the normalized expression data to the right of gene symbol. Table S8. Genes within profile #2 for normal samples: This table contains all genes within profile #2 for normal samples, and lists the normalized expression data to the right of gene symbol. Table S9. Genes within profile #9 for normal samples: This table contains all genes within profile #9 for normal samples, and lists the normalized expression data to the right of gene symbol. Table S10. Genes within profile #12 for normal samples: This table contains all genes within profile # 12 for normal samples, and lists the normalized expression data to the right of gene symbol. Table S11. Genes within profile #14 for normal samples: This table contains all genes within profile #14 for normal samples, and lists the normalized expression data to the right of gene symbol. Ta [file 867289.f1.zip › 867289.f1/Table S17.xls]

## Sheet: Sheet1
GO Results for Intersection of (row) Profile 0 with (column) Profile 0 based on the actual number of genes in the intersection (0.0,-2.0,-3.0,-2.0)
-------
Category ID	Category Name	#Genes Category	#Genes Assigned	#Genes Expected	#Genes Enriched	p-value	Corrected p-value	Fold
GO:0044260	cellular macromolecule metabolic process	6565	128	73.9	54.1	1.5e-13	<0.001	1.7
GO:0090304	nucleic acid metabolic process	4331	98	48.8	49.2	1.8e-13	<0.001	2
GO:0005634	nucleus	5283	111	59.5	51.5	2.2e-13	<0.001	1.9
GO:0016070	RNA metabolic process	3795	90	42.7	47.3	2.3e-13	<0.001	2.1
GO:0003676	nucleic acid binding	3550	83	40	43	7.5e-12	<0.001	2.1
GO:0043170	macromolecule metabolic process	7105	130	80	50	1.2e-11	<0.001	1.6
GO:0010467	gene expression	4811	100	54.2	45.8	1.9e-11	<0.001	1.8
GO:0006139	nucleobase-containing compound metabolic process	5257	106	59.2	46.8	1.9e-11	<0.001	1.8
GO:0006351	transcription, DNA-templated	3108	75	35	40	2.9e-11	<0.001	2.1
GO:0032774	RNA biosynthetic process	3199	76	36	40	4.2e-11	<0.001	2.1
GO:0046483	heterocycle metabolic process	5422	107	61	46	5.6e-11	<0.001	1.8
GO:0006725	cellular aromatic compound metabolic process	5432	107	61.2	45.8	6.3e-11	<0.001	1.7
GO:0009889	regulation of biosynthetic process	3382	78	38.1	39.9	8.9e-11	<0.001	2
GO:2001141	regulation of RNA biosynthetic process	2853	69	32.1	36.9	2.3e-10	<0.001	2.1
GO:0010556	regulation of macromolecule biosynthetic process	3197	74	36	38	3e-10	<0.001	2.1
GO:0051252	regulation of RNA metabolic process	2934	70	33	37	3e-10	<0.001	2.1
GO:0031326	regulation of cellular biosynthetic process	3338	76	37.6	38.4	3.3e-10	<0.001	2
GO:0006355	regulation of transcription, DNA-templated	2818	68	31.7	36.3	3.6e-10	<0.001	2.1
GO:0009059	macromolecule biosynthetic process	4187	88	47.1	40.9	4.1e-10	<0.001	1.9
GO:0034654	nucleobase-containing compound biosynthetic process	3506	78	39.5	38.5	5.1e-10	<0.001	2
GO:0034641	cellular nitrogen compound metabolic process	5629	107	63.4	43.6	6e-10	<0.001	1.7
GO:1901360	organic cyclic compound metabolic process	5638	107	63.5	43.5	6.6e-10	<0.001	1.7
GO:0018130	heterocycle biosynthetic process	3574	78	40.2	37.8	1.3e-09	<0.001	1.9
GO:0019438	aromatic compound biosynthetic process	3576	78	40.3	37.7	1.3e-09	<0.001	1.9
GO:0019219	regulation of nucleobase-containing compound metabolic process	3529	77	39.7	37.3	1.8e-09	<0.001	1.9
GO:0010468	regulation of gene expression	3480	76	39.2	36.8	2.3e-09	<0.001	1.9
GO:0044271	cellular nitrogen compound biosynthetic process	3633	78	40.9	37.1	2.8e-09	<0.001	1.9
GO:2000112	regulation of cellular macromolecule biosynthetic process	3090	70	34.8	35.2	2.8e-09	<0.001	2
GO:0034645	cellular macromolecule biosynthetic process	4063	84	45.7	38.3	3e-09	<0.001	1.8
GO:0051171	regulation of nitrogen compound metabolic process	3615	77	40.7	36.3	5.3e-09	<0.001	1.9
GO:1901362	organic cyclic compound biosynthetic process	3688	78	41.5	36.5	5.5e-09	<0.001	1.9
GO:0060255	regulation of macromolecule metabolic process	4295	86	48.4	37.6	8.6e-09	<0.001	1.8
GO:0000123	histone acetyltransferase complex	73	10	0.8	9.2	9e-09	<0.001	12.2
GO:0016568	chromatin modification	492	23	5.5	17.5	9.4e-09	<0.001	4.2
GO:0006807	nitrogen compound metabolic process	5993	108	67.5	40.5	1.2e-08	<0.001	1.6
GO:0031323	regulation of cellular metabolic process	4623	90	52	38	1.3e-08	<0.001	1.7
GO:0080090	regulation of primary metabolic process	4516	88	50.8	37.2	2e-08	<0.001	1.7
GO:0051276	chromosome organization	789	29	8.9	20.1	2.2e-08	<0.001	3.3
GO:1902493	acetyltransferase complex	81	10	0.9	9.1	2.5e-08	<0.001	11
GO:0031248	protein acetyltransferase complex	81	10	0.9	9.1	2.5e-08	<0.001	11
GO:0044428	nuclear part	2271	55	25.6	29.4	2.7e-08	<0.001	2.2
GO:0019222	regulation of metabolic process	5140	95	57.9	37.1	5.5e-08	<0.001	1.6
GO:0009058	biosynthetic process	5141	95	57.9	37.1	5.5e-08	<0.001	1.6
GO:1901363	heterocyclic compound binding	5325	97	60	37	7.5e-08	<0.001	1.6
GO:0006325	chromatin organization	599	24	6.7	17.3	8.2e-08	<0.001	3.6
GO:0044451	nucleoplasm part	650	25	7.3	17.7	9.5e-08	<0.001	3.4
GO:1901576	organic substance biosynthetic process	5070	93	57.1	35.9	1.2e-07	<0.001	1.6
GO:0097159	organic cyclic compound binding	5397	97	60.8	36.2	1.5e-07	<0.001	1.6
GO:0044238	primary metabolic process	8526	135	96	39	1.6e-07	<0.001	1.4
GO:0044237	cellular metabolic process	8619	136	97	39	1.7e-07	<0.001	1.4
GO:0044249	cellular biosynthetic process	4970	91	56	35	2.1e-07	<0.001	1.6
GO:0005654	nucleoplasm	1469	39	16.5	22.5	4.6e-07	0.002	2.4
GO:0031981	nuclear lumen	1903	46	21.4	24.6	5.2e-07	0.002	2.1
GO:0003677	DNA binding	2199	50	24.8	25.2	9.4e-07	0.002	2
GO:0016573	histone acetylation	121	10	1.4	8.6	1.1e-06	0.002	7.3
GO:0043231	intracellular membrane-bounded organelle	8798	135	99.1	35.9	1.3e-06	0.002	1.4
GO:0018393	internal peptidyl-lysine acetylation	124	10	1.4	8.6	1.4e-06	0.002	7.2
GO:0071704	organic substance metabolic process	8828	135	99.4	35.6	1.6e-06	0.002	1.4
GO:0018394	peptidyl-lysine acetylation	129	10	1.5	8.5	2.1e-06	0.002	6.9
GO:0004402	histone acetyltransferase activity	53	7	0.6	6.4	2.1e-06	0.002	11.7
GO:0006475	internal protein amino acid acetylation	130	10	1.5	8.5	2.2e-06	0.004	6.8
GO:1990234	transferase complex	359	16	4	12	3.4e-06	0.004	4
GO:0018205	peptidyl-lysine modification	169	11	1.9	9.1	3.5e-06	0.004	5.8
GO:0070013	intracellular organelle lumen	2504	53	28.2	24.8	3.6e-06	0.004	1.9
GO:0006473	protein acetylation	143	10	1.6	8.4	5.2e-06	0.008	6.2
GO:0043233	organelle lumen	2562	53	28.8	24.2	7e-06	0.008	1.8
GO:0043169	cation binding	3766	69	42.4	26.6	1.3e-05	0.014	1.6
GO:0046872	metal ion binding	3698	68	41.6	26.4	1.4e-05	0.014	1.6
GO:0043966	histone H3 acetylation	49	6	0.6	5.4	1.8e-05	0.018	10.9
GO:0016570	histone modification	325	14	3.7	10.3	2e-05	0.02	3.8
GO:0008080	N-acetyltransferase activity	76	7	0.9	6.1	2.4e-05	0.024	8.2
GO:0016569	covalent chromatin modification	330	14	3.7	10.3	2.4e-05	0.024	3.8
GO:0043543	protein acylation	172	10	1.9	8.1	2.6e-05	0.03	5.2
GO:0003723	RNA binding	1450	34	16.3	17.7	3.7e-05	0.038	2.1
GO Results for Intersection of (row) Profile 2 with (column) Profile 2 based on the actual number of genes in the intersection (0.0,-1.0,-2.0,-3.0)
-------
Category ID	Category Name	#Genes Category	#Genes Assigned	#Genes Expected	#Genes Enriched	p-value	Corrected p-value	Fold
GO:0005515	protein binding	7922	360	264.9	95.1	5.5e-14	<0.001	1.4
GO:0044424	intracellular part	11386	461	380.7	80.3	1.5e-10	<0.001	1.2
GO:0005622	intracellular	11505	464	384.7	79.3	2.3e-10	<0.001	1.2
GO:0043227	membrane-bounded organelle	9610	401	321.3	79.7	4e-10	<0.001	1.2
GO:0006950	response to stress	3179	167	106.3	60.7	5.9e-10	<0.001	1.6
GO:0043231	intracellular membrane-bounded organelle	8798	371	294.2	76.8	1.4e-09	<0.001	1.3
GO:0044763	single-organism cellular process	10243	419	342.5	76.5	1.7e-09	<0.001	1.2
GO:0043229	intracellular organelle	9792	404	327.4	76.6	1.7e-09	<0.001	1.2
GO:1901576	organic substance biosynthetic process	5070	238	169.5	68.5	1.8e-09	<0.001	1.4
GO:0009058	biosynthetic process	5141	240	171.9	68.1	2.5e-09	<0.001	1.4
GO:0044422	organelle part	6139	276	205.3	70.7	3.3e-09	<0.001	1.3
GO:0044464	cell part	13204	512	441.5	70.5	3.5e-09	<0.001	1.2
GO:0005737	cytoplasm	8587	361	287.1	73.9	5.2e-09	<0.001	1.3
GO:0048518	positive regulation of biological process	3900	191	130.4	60.6	6.9e-09	<0.001	1.5
GO:0044446	intracellular organelle part	5978	268	199.9	68.1	9.3e-09	<0.001	1.3
GO:0044249	cellular biosynthetic process	4970	230	166.2	63.8	1.5e-08	<0.001	1.4
GO:0005634	nucleus	5283	241	176.6	64.4	2e-08	<0.001	1.4
GO:0044428	nuclear part	2271	124	75.9	48.1	2e-08	<0.001	1.6
GO:0048522	positive regulation of cellular process	3482	172	116.4	55.6	3e-08	<0.001	1.5
GO:0071704	organic substance metabolic process	8828	365	295.2	69.8	3.4e-08	<0.001	1.2
GO:0043170	macromolecule metabolic process	7105	305	237.6	67.4	4e-08	<0.001	1.3
GO:0044822	poly(A) RNA binding	1111	72	37.1	34.9	5.6e-08	<0.001	1.9
GO:0044237	cellular metabolic process	8619	356	288.2	67.8	7.6e-08	<0.001	1.2
GO:0050789	regulation of biological process	8305	345	277.7	67.3	8.4e-08	<0.001	1.2
GO:0070013	intracellular organelle lumen	2504	131	83.7	47.3	9.3e-08	<0.001	1.6
GO:0044238	primary metabolic process	8526	352	285.1	66.9	1.1e-07	<0.001	1.2
GO:0044271	cellular nitrogen compound biosynthetic process	3633	175	121.5	53.5	1.3e-07	<0.001	1.4
GO:0009059	macromolecule biosynthetic process	4187	196	140	56	1.4e-07	<0.001	1.4
GO:0012505	endomembrane system	2922	147	97.7	49.3	1.4e-07	<0.001	1.5
GO:0034641	cellular nitrogen compound metabolic process	5629	249	188.2	60.8	1.6e-07	<0.001	1.3
GO:0019222	regulation of metabolic process	5140	231	171.9	59.1	1.7e-07	<0.001	1.3
GO:0031981	nuclear lumen	1903	105	63.6	41.4	1.9e-07	<0.001	1.7
GO:0043233	organelle lumen	2562	132	85.7	46.3	2e-07	<0.001	1.5
GO:0051253	negative regulation of RNA metabolic process	911	61	30.5	30.5	2e-07	<0.001	2
GO:0010468	regulation of gene expression	3480	168	116.4	51.6	2.2e-07	<0.001	1.4
GO:0051171	regulation of nitrogen compound metabolic process	3615	173	120.9	52.1	2.4e-07	<0.001	1.4
GO:0010467	gene expression	4811	218	160.9	57.1	2.6e-07	<0.001	1.4
GO:0044260	cellular macromolecule metabolic process	6565	281	219.5	61.5	3.3e-07	<0.001	1.3
GO:0034654	nucleobase-containing compound biosynthetic process	3506	168	117.2	50.8	3.6e-07	<0.001	1.4
GO:0050794	regulation of cellular process	7858	326	262.7	63.3	3.7e-07	<0.001	1.2
GO:0006807	nitrogen compound metabolic process	5993	260	200.4	59.6	4.1e-07	<0.001	1.3
GO:0018130	heterocycle biosynthetic process	3574	170	119.5	50.5	4.9e-07	<0.001	1.4
GO:0006366	transcription from RNA polymerase II promoter	1564	89	52.3	36.7	5e-07	<0.001	1.7
GO:0019438	aromatic compound biosynthetic process	3576	170	119.6	50.4	5e-07	<0.001	1.4
GO:0010033	response to organic substance	2240	117	74.9	42.1	5.8e-07	<0.001	1.6
GO:0031323	regulation of cellular metabolic process	4623	209	154.6	54.4	6.3e-07	<0.001	1.4
GO:0051172	negative regulation of nitrogen compound metabolic process	1029	65	34.4	30.6	6.4e-07	<0.001	1.9
GO:0045934	negative regulation of nucleobase-containing compound metabolic process	1009	64	33.7	30.3	6.8e-07	<0.001	1.9
GO:0007166	cell surface receptor signaling pathway	2596	131	86.8	44.2	7e-07	<0.001	1.5
GO:0006139	nucleobase-containing compound metabolic process	5257	232	175.8	56.2	7.3e-07	<0.001	1.3
GO:0048519	negative regulation of biological process	3446	164	115.2	48.8	8.1e-07	<0.001	1.4
GO:0019219	regulation of nucleobase-containing compound metabolic process	3529	167	118	49	8.9e-07	<0.001	1.4
GO:0060255	regulation of macromolecule metabolic process	4295	196	143.6	52.4	8.9e-07	<0.001	1.4
GO:0034645	cellular macromolecule biosynthetic process	4063	187	135.9	51.1	1e-06	<0.001	1.4
GO:0048583	regulation of response to stimulus	2793	138	93.4	44.6	1.1e-06	<0.001	1.5
GO:0051252	regulation of RNA metabolic process	2934	143	98.1	44.9	1.4e-06	<0.001	1.5
GO:0080090	regulation of primary metabolic process	4516	203	151	52	1.5e-06	<0.001	1.3
GO:0090304	nucleic acid metabolic process	4331	196	144.8	51.2	1.6e-06	<0.001	1.4
GO:0006725	cellular aromatic compound metabolic process	5432	236	181.6	54.4	1.9e-06	<0.001	1.3
GO:0044444	cytoplasmic part	6637	279	221.9	57.1	2e-06	<0.001	1.3
GO:0048523	negative regulation of cellular process	3133	150	104.8	45.2	2e-06	<0.001	1.4
GO:2000113	negative regulation of cellular macromolecule biosynthetic process	977	61	32.7	28.3	2.1e-06	<0.001	1.9
GO:0071310	cellular response to organic substance	1667	91	55.7	35.3	2.2e-06	<0.001	1.6
GO:0006357	regulation of transcription from RNA polymerase II promoter	1362	78	45.5	32.5	2.2e-06	<0.001	1.7
GO:0046483	heterocycle metabolic process	5422	235	181.3	53.7	2.5e-06	<0.001	1.3
GO:0005783	endoplasmic reticulum	1321	76	44.2	31.8	2.5e-06	<0.001	1.7
GO:0044432	endoplasmic reticulum part	918	58	30.7	27.3	2.6e-06	<0.001	1.9
GO:0051716	cellular response to stimulus	5442	235	182	53	3.3e-06	0.002	1.3
GO:2001141	regulation of RNA biosynthetic process	2853	138	95.4	42.6	3.4e-06	0.002	1.4
GO:1901362	organic cyclic compound biosynthetic process	3688	170	123.3	46.7	3.6e-06	0.002	1.4
GO:2000112	regulation of cellular macromolecule biosynthetic process	3090	147	103.3	43.7	3.8e-06	0.002	1.4
GO:0033554	cellular response to stress	1360	77	45.5	31.5	3.9e-06	0.002	1.7
GO:0010556	regulation of macromolecule biosynthetic process	3197	151	106.9	44.1	4e-06	0.002	1.4
GO:0010558	negative regulation of macromolecule biosynthetic process	1023	62	34.2	27.8	4.5e-06	0.004	1.8
GO:0006355	regulation of transcription, DNA-templated	2818	136	94.2	41.8	4.6e-06	0.004	1.4
GO:0000122	negative regulation of transcription from RNA polymerase II promoter	555	40	18.6	21.4	4.8e-06	0.008	2.2
GO:0006351	transcription, DNA-templated	3108	147	103.9	43.1	5.2e-06	0.01	1.4
GO:0007165	signal transduction	4490	199	150.1	48.9	5.4e-06	0.01	1.3
GO:0030055	cell-substrate junction	113	15	3.8	11.2	5.4e-06	0.01	4
GO:0010605	negative regulation of macromolecule metabolic process	1515	83	50.7	32.3	5.6e-06	0.01	1.6
GO:0031324	negative regulation of cellular metabolic process	1516	83	50.7	32.3	5.7e-06	0.01	1.6
GO:0005654	nucleoplasm	1469	81	49.1	31.9	5.7e-06	0.01	1.6
GO:0070887	cellular response to chemical stimulus	2079	106	69.5	36.5	6.4e-06	0.012	1.5
GO:0003723	RNA binding	1450	80	48.5	31.5	6.4e-06	0.012	1.7
GO:1902679	negative regulation of RNA biosynthetic process	882	55	29.5	25.5	7e-06	0.012	1.9
GO:0031326	regulation of cellular biosynthetic process	3338	155	111.6	43.4	7.5e-06	0.014	1.4
GO:0050686	negative regulation of mRNA processing	16	6	0.5	5.5	8.2e-06	0.022	11.2
GO:0045892	negative regulation of transcription, DNA-templated	865	54	28.9	25.1	8.3e-06	0.022	1.9
GO:0008283	cell proliferation	1678	89	56.1	32.9	8.9e-06	0.022	1.6
GO:0000278	mitotic cell cycle	869	54	29.1	24.9	9.4e-06	0.024	1.9
GO:0042221	response to chemical	3118	146	104.3	41.7	9.7e-06	0.024	1.4
GO:0010629	negative regulation of gene expression	982	59	32.8	26.2	1e-05	0.024	1.8
GO:0009889	regulation of biosynthetic process	3382	156	113.1	42.9	1e-05	0.024	1.4
GO:0005912	adherens junction	180	19	6	13	1e-05	0.028	3.2
GO:0044764	multi-organism cellular process	677	45	22.6	22.4	1e-05	0.028	2
GO:0006952	defense response	1375	76	46	30	1.1e-05	0.028	1.7
GO:0031327	negative regulation of cellular biosynthetic process	1074	63	35.9	27.1	1.1e-05	0.028	1.8
GO:0005924	cell-substrate adherens junction	105	14	3.5	10.5	1.1e-05	0.028	4
GO:0060429	epithelium development	788	50	26.3	23.7	1.2e-05	0.028	1.9
GO:0016070	RNA metabolic process	3795	171	126.9	44.1	1.3e-05	0.032	1.3
GO:0006974	cellular response to DNA damage stimulus	685	45	22.9	22.1	1.4e-05	0.034	2
GO:0009892	negative regulation of metabolic process	1652	87	55.2	31.8	1.5e-05	0.038	1.6
GO:1901360	organic cyclic compound metabolic process	5638	238	188.5	49.5	1.5e-05	0.04	1.3
GO:0032774	RNA biosynthetic process	3199	148	107	41	1.6e-05	0.04	1.4
GO:0080134	regulation of response to stress	885	54	29.6	24.4	1.6e-05	0.04	1.8
GO:0016032	viral process	668	44	22.3	21.7	1.6e-05	0.04	2
GO:0009890	negative regulation of biosynthetic process	1090	63	36.4	26.6	1.7e-05	0.044	1.7
GO:0010604	positive regulation of macromolecule metabolic process	2031	102	67.9	34.1	1.9e-05	0.048	1.5
GO:0030334	regulation of cell migration	486	35	16.3	18.7	1.9e-05	0.048	2.2
GO:0009893	positive regulation of metabolic process	2238	110	74.8	35.2	2.1e-05	0.048	1.5
GO Results for Intersection of (row) Profile 12 with (column) Profile 12 based on the actual number of genes in the intersection (0.0,1.0,2.0,3.0)
-------
Category ID	Category Name	#Genes Category	#Genes Assigned	#Genes Expected	#Genes Enriched	p-value	Corrected p-value	Fold
GO:0005737	cytoplasm	8587	397	304.6	92.4	1.7e-12	<0.001	1.3
GO:0019752	carboxylic acid metabolic process	880	71	31.2	39.8	8.6e-11	<0.001	2.3
GO:0044281	small molecule metabolic process	2789	158	98.9	59.1	7.5e-10	<0.001	1.6
GO:0043436	oxoacid metabolic process	992	74	35.2	38.8	1.2e-09	<0.001	2.1
GO:0006082	organic acid metabolic process	1008	74	35.8	38.2	2.3e-09	<0.001	2.1
GO:0006520	cellular amino acid metabolic process	457	43	16.2	26.8	6.6e-09	<0.001	2.7
GO:0044444	cytoplasmic part	6637	307	235.4	71.6	1e-08	<0.001	1.3
GO:0044282	small molecule catabolic process	260	30	9.2	20.8	1.5e-08	<0.001	3.3
GO:0016491	oxidoreductase activity	667	54	23.7	30.3	1.6e-08	<0.001	2.3
GO:0051186	cofactor metabolic process	256	29	9.1	19.9	3.8e-08	<0.001	3.2
GO:0009063	cellular amino acid catabolic process	109	18	3.9	14.1	5.2e-08	<0.001	4.7
GO:0044424	intracellular part	11386	473	403.9	69.1	7.9e-08	<0.001	1.2
GO:0005622	intracellular	11505	477	408.1	68.9	8.2e-08	<0.001	1.2
GO:0048037	cofactor binding	252	28	8.9	19.1	9.9e-08	<0.001	3.1
GO:0046395	carboxylic acid catabolic process	198	24	7	17	1.6e-07	<0.001	3.4
GO:0016054	organic acid catabolic process	198	24	7	17	1.6e-07	<0.001	3.4
GO:0030990	intraciliary transport particle	15	7	0.5	6.5	3.4e-07	<0.001	13.2
GO:0044782	cilium organization	111	17	3.9	13.1	3.8e-07	<0.001	4.3
GO:0060271	cilium morphogenesis	124	18	4.4	13.6	3.9e-07	<0.001	4.1
GO:0032391	photoreceptor connecting cilium	22	8	0.8	7.2	5e-07	<0.001	10.3
GO:0005739	mitochondrion	1396	85	49.5	35.5	6.8e-07	<0.001	1.7
GO:0005759	mitochondrial matrix	315	30	11.2	18.8	1e-06	<0.001	2.7
GO:0030992	intraciliary transport particle B	7	5	0.2	4.8	1.1e-06	<0.001	20.1
GO:0044712	single-organism catabolic process	1399	84	49.6	34.4	1.4e-06	<0.001	1.7
GO:0000098	sulfur amino acid catabolic process	12	6	0.4	5.6	1.5e-06	<0.001	14.1
GO:0000096	sulfur amino acid metabolic process	42	10	1.5	8.5	1.6e-06	0.002	6.7
GO:0006575	cellular modified amino acid metabolic process	196	22	7	15	1.9e-06	0.002	3.2
GO:0044429	mitochondrial part	777	54	27.6	26.4	2e-06	0.002	2
GO:0042384	cilium assembly	99	14	3.5	10.5	1e-05	0.018	4
GO:0016801	hydrolase activity, acting on ether bonds	10	5	0.4	4.6	1.2e-05	0.02	14.1
GO:1901564	organonitrogen compound metabolic process	1940	104	68.8	35.2	1.2e-05	0.024	1.5
GO:0045017	glycerolipid biosynthetic process	221	22	7.8	14.2	1.4e-05	0.024	2.8
GO:0016787	hydrolase activity	2210	115	78.4	36.6	1.5e-05	0.026	1.5
GO:0006629	lipid metabolic process	1147	68	40.7	27.3	2.3e-05	0.046	1.7
GO:0050662	coenzyme binding	180	19	6.4	12.6	2.3e-05	0.046	3
GO Results for Intersection of (row) Profile 14 with (column) Profile 14 based on the actual number of genes in the intersection (0.0,2.0,3.0,2.0)
-------
Category ID	Category Name	#Genes Category	#Genes Assigned	#Genes Expected	#Genes Enriched	p-value	Corrected p-value	Fold
GO:0009205	purine ribonucleoside triphosphate metabolic process	657	24	8.8	15.2	8.9e-06	0.014	2.7
GO:0009199	ribonucleoside triphosphate metabolic process	663	24	8.8	15.2	1e-05	0.014	2.7
GO:0009144	purine nucleoside triphosphate metabolic process	663	24	8.8	15.2	1e-05	0.014	2.7
GO:0009141	nucleoside triphosphate metabolic process	680	24	9.1	14.9	1.6e-05	0.022	2.6
GO:0046128	purine ribonucleoside metabolic process	733	25	9.8	15.2	1.8e-05	0.024	2.6
GO:0042278	purine nucleoside metabolic process	736	25	9.8	15.2	2e-05	0.024	2.5
GO:0009203	ribonucleoside triphosphate catabolic process	609	22	8.1	13.9	2.5e-05	0.032	2.7
GO:0009207	purine ribonucleoside triphosphate catabolic process	609	22	8.1	13.9	2.5e-05	0.032	2.7
GO:0009146	purine nucleoside triphosphate catabolic process	612	22	8.2	13.8	2.7e-05	0.032	2.7
GO:0009143	nucleoside triphosphate catabolic process	615	22	8.2	13.8	2.9e-05	0.032	2.7
GO:0009119	ribonucleoside metabolic process	755	25	10.1	14.9	3e-05	0.034	2.5
GO:0046130	purine ribonucleoside catabolic process	621	22	8.3	13.7	3.4e-05	0.04	2.7
GO:0006152	purine nucleoside catabolic process	621	22	8.3	13.7	3.4e-05	0.04	2.7
