# Supplementary material for: Systematic Analysis of Time-Series Gene Expression Data on Tumor Cell-Selective Apoptotic Responses to HDAC Inhibitors
Source: Comput Math Methods Med. 2014 Oct 13;2014:867289. doi: 10.1155/2014/867289 (PMC4211306; doi:10.1155/2014/867289)
Supplement: Supplementary file 1 — Table S1. H-score of all pathways for tumor and normal samples: This table lists the name, category, website and H-score values for all 1307 pathway. Table S2. Illustrative pathways belonging to term "No responding": This table lists the name, category, website and TVPC patterns for "No responding" pathways. Table S3. Illustrative pathways belonging to term "Consistent responding": This table lists the name, category, website and TVPC patterns for "Consistent responding" pathways. Table S4. Illustrative pathways belonging to term "Tumor specific responding": This table lists the name, category, website and TVPC patterns for "Tumor specific responding" pathways. Table S5. Illustrative pathways belonging to term "Normal specific responding": This table lists the name, category, web site and TVPC patterns for "Normal specific responding" pathways. Table S6. Illustrative pathways belonging to term "Divergent responding": This table lists the name, category, website and TVPC patterns for "Divergent responding" pathways. Table S7. Genes within profile #0 for normal samples: This table contains all genes within profile #0 for normal samples, and lists the normalized expression data to the right of gene symbol. Table S8. Genes within profile #2 for normal samples: This table contains all genes within profile #2 for normal samples, and lists the normalized expression data to the right of gene symbol. Table S9. Genes within profile #9 for normal samples: This table contains all genes within profile #9 for normal samples, and lists the normalized expression data to the right of gene symbol. Table S10. Genes within profile #12 for normal samples: This table contains all genes within profile # 12 for normal samples, and lists the normalized expression data to the right of gene symbol. Table S11. Genes within profile #14 for normal samples: This table contains all genes within profile #14 for normal samples, and lists the normalized expression data to the right of gene symbol. Ta [file 867289.f1.zip › 867289.f1/Table S18.xls]

## Sheet: Sheet1
GO Results for Intersection of (row) Profile 2 with (column) Profile 0 based on the actual number of genes in the intersection (0.0,-2.0,-3.0,-2.0)
-------
Category ID	Category Name	#Genes Category	#Genes Assigned	#Genes Expected	#Genes Enriched	p-value	Corrected p-value	Fold
GO:0010605	negative regulation of macromolecule metabolic process	1515	34	10.4	23.6	4.6e-10	<0.001	3.3
GO:0031324	negative regulation of cellular metabolic process	1516	33	10.4	22.6	1.9e-09	<0.001	3.2
GO:2000113	negative regulation of cellular macromolecule biosynthetic process	977	26	6.7	19.3	2.4e-09	<0.001	3.9
GO:0051253	negative regulation of RNA metabolic process	911	25	6.2	18.8	2.7e-09	<0.001	4
GO:0009892	negative regulation of metabolic process	1652	34	11.3	22.7	4.3e-09	<0.001	3
GO:0045892	negative regulation of transcription, DNA-templated	865	24	5.9	18.1	4.7e-09	<0.001	4.1
GO:0010558	negative regulation of macromolecule biosynthetic process	1023	26	7	19	6.1e-09	<0.001	3.7
GO:1902679	negative regulation of RNA biosynthetic process	882	24	6	18	6.9e-09	<0.001	4
GO:0010629	negative regulation of gene expression	982	25	6.7	18.3	1.2e-08	<0.001	3.7
GO:0031327	negative regulation of cellular biosynthetic process	1074	26	7.3	18.7	1.6e-08	<0.001	3.5
GO:0045934	negative regulation of nucleobase-containing compound metabolic process	1009	25	6.9	18.1	2.1e-08	<0.001	3.6
GO:0009890	negative regulation of biosynthetic process	1090	26	7.5	18.5	2.2e-08	<0.001	3.5
GO:0051172	negative regulation of nitrogen compound metabolic process	1029	25	7	18	3e-08	<0.001	3.6
GO:0051252	regulation of RNA metabolic process	2934	45	20.1	24.9	6.8e-08	<0.001	2.2
GO:0003682	chromatin binding	397	15	2.7	12.3	9.7e-08	<0.001	5.5
GO:0044260	cellular macromolecule metabolic process	6565	75	44.9	30.1	1.2e-07	<0.001	1.7
GO:0003676	nucleic acid binding	3550	50	24.3	25.7	1.4e-07	<0.001	2.1
GO:0010468	regulation of gene expression	3480	49	23.8	25.2	2e-07	<0.001	2.1
GO:2000112	regulation of cellular macromolecule biosynthetic process	3090	45	21.1	23.9	3.1e-07	<0.001	2.1
GO:0010467	gene expression	4811	60	32.9	27.1	3.3e-07	<0.001	1.8
GO:0006355	regulation of transcription, DNA-templated	2818	42	19.3	22.7	4.9e-07	<0.001	2.2
GO:0060255	regulation of macromolecule metabolic process	4295	55	29.4	25.6	6e-07	<0.001	1.9
GO:2001141	regulation of RNA biosynthetic process	2853	42	19.5	22.5	6.9e-07	<0.001	2.2
GO:0043170	macromolecule metabolic process	7105	77	48.6	28.4	7.2e-07	<0.001	1.6
GO:0090304	nucleic acid metabolic process	4331	55	29.6	25.4	8e-07	<0.001	1.9
GO:0010556	regulation of macromolecule biosynthetic process	3197	45	21.9	23.1	8.3e-07	<0.001	2.1
GO:0006351	transcription, DNA-templated	3108	44	21.3	22.7	1e-06	<0.001	2.1
GO:0043565	sequence-specific DNA binding	688	18	4.7	13.3	1.1e-06	<0.001	3.8
GO:0016070	RNA metabolic process	3795	50	26	24	1.1e-06	<0.001	1.9
GO:0000122	negative regulation of transcription from RNA polymerase II promoter	555	16	3.8	12.2	1.3e-06	<0.001	4.2
GO:0016568	chromatin modification	492	15	3.4	11.6	1.5e-06	<0.001	4.5
GO:0005634	nucleus	5283	62	36.1	25.9	1.7e-06	0.002	1.7
GO:0019219	regulation of nucleobase-containing compound metabolic process	3529	47	24.1	22.9	2.1e-06	0.002	1.9
GO:0032774	RNA biosynthetic process	3199	44	21.9	22.1	2.2e-06	0.002	2
GO:0031326	regulation of cellular biosynthetic process	3338	45	22.8	22.2	2.8e-06	0.002	2
GO:0031323	regulation of cellular metabolic process	4623	56	31.6	24.4	2.8e-06	0.002	1.8
GO:0018130	heterocycle biosynthetic process	3574	47	24.5	22.5	3e-06	0.002	1.9
GO:0019438	aromatic compound biosynthetic process	3576	47	24.5	22.5	3.1e-06	0.002	1.9
GO:0044212	transcription regulatory region DNA binding	392	13	2.7	10.3	3.1e-06	0.002	4.8
GO:0000975	regulatory region DNA binding	400	13	2.7	10.3	3.8e-06	0.004	4.7
GO:0001067	regulatory region nucleic acid binding	400	13	2.7	10.3	3.8e-06	0.004	4.7
GO:0009889	regulation of biosynthetic process	3382	45	23.1	21.9	4e-06	0.006	1.9
GO:0051171	regulation of nitrogen compound metabolic process	3615	47	24.7	22.3	4.2e-06	0.006	1.9
GO:0034654	nucleobase-containing compound biosynthetic process	3506	46	24	22	4.3e-06	0.006	1.9
GO:0044271	cellular nitrogen compound biosynthetic process	3633	47	24.9	22.1	4.8e-06	0.006	1.9
GO:0006357	regulation of transcription from RNA polymerase II promoter	1362	25	9.3	15.7	5.5e-06	0.006	2.7
GO:0080090	regulation of primary metabolic process	4516	54	30.9	23.1	7.2e-06	0.008	1.7
GO:1901362	organic cyclic compound biosynthetic process	3688	47	25.2	21.8	7.3e-06	0.008	1.9
GO:0006139	nucleobase-containing compound metabolic process	5257	60	36	24	7.3e-06	0.008	1.7
GO:0019222	regulation of metabolic process	5140	59	35.2	23.8	7.7e-06	0.01	1.7
GO:0048523	negative regulation of cellular process	3133	42	21.4	20.6	8e-06	0.01	2
GO:0034645	cellular macromolecule biosynthetic process	4063	50	27.8	22.2	8.7e-06	0.012	1.8
GO:0046483	heterocycle metabolic process	5422	61	37.1	23.9	9.3e-06	0.014	1.6
GO:0006725	cellular aromatic compound metabolic process	5432	61	37.2	23.8	9.9e-06	0.014	1.6
GO:0003677	DNA binding	2199	33	15	18	1.1e-05	0.014	2.2
GO:1901363	heterocyclic compound binding	5325	60	36.4	23.6	1.1e-05	0.014	1.6
GO:0046914	transition metal ion binding	1349	24	9.2	14.8	1.5e-05	0.016	2.6
GO:0006325	chromatin organization	599	15	4.1	10.9	1.6e-05	0.016	3.7
GO:0097159	organic cyclic compound binding	5397	60	36.9	23.1	1.7e-05	0.02	1.6
GO:0006366	transcription from RNA polymerase II promoter	1564	26	10.7	15.3	2e-05	0.022	2.4
GO:0009059	macromolecule biosynthetic process	4187	50	28.7	21.3	2e-05	0.022	1.7
GO:0044249	cellular biosynthetic process	4970	56	34	22	2.8e-05	0.03	1.6
GO:0008270	zinc ion binding	1131	21	7.7	13.3	2.9e-05	0.032	2.7
GO:0034641	cellular nitrogen compound metabolic process	5629	61	38.5	22.5	3.2e-05	0.036	1.6
GO:1901360	organic cyclic compound metabolic process	5638	61	38.6	22.4	3.4e-05	0.042	1.6
GO:0048519	negative regulation of biological process	3446	43	23.6	19.4	3.6e-05	0.044	1.8
GO:0044238	primary metabolic process	8526	82	58.3	23.7	4.1e-05	0.046	1.4
GO Results for Intersection of (row) Profile 0 with (column) Profile 2 based on the actual number of genes in the intersection (0.0,-1.0,-2.0,-3.0)
-------
Category ID	Category Name	#Genes Category	#Genes Assigned	#Genes Expected	#Genes Enriched	p-value	Corrected p-value	Fold
GO:0006261	DNA-dependent DNA replication	114	7	0.6	6.4	1.7e-06	0.002	12.3
GO:0006259	DNA metabolic process	932	17	4.7	12.3	3.5e-06	0.004	3.6
GO:0005657	replication fork	50	5	0.2	4.8	5e-06	0.004	20
GO:0022402	cell cycle process	1130	18	5.6	12.4	1.1e-05	0.012	3.2
GO:0006260	DNA replication	289	9	1.4	7.6	1.5e-05	0.016	6.2
GO:0000278	mitotic cell cycle	869	15	4.3	10.7	2.7e-05	0.018	3.5
GO:0006974	cellular response to DNA damage stimulus	685	13	3.4	9.6	3.7e-05	0.026	3.8
GO:0007049	cell cycle	1493	20	7.5	12.5	4.3e-05	0.034	2.7
GO:0006281	DNA repair	417	10	2.1	7.9	4.6e-05	0.034	4.8
