# Supplementary material for: Systematic Analysis of Time-Series Gene Expression Data on Tumor Cell-Selective Apoptotic Responses to HDAC Inhibitors
Source: Comput Math Methods Med. 2014 Oct 13;2014:867289. doi: 10.1155/2014/867289 (PMC4211306; doi:10.1155/2014/867289)
Supplement: Supplementary file 1 — Table S1. H-score of all pathways for tumor and normal samples: This table lists the name, category, website and H-score values for all 1307 pathway. Table S2. Illustrative pathways belonging to term "No responding": This table lists the name, category, website and TVPC patterns for "No responding" pathways. Table S3. Illustrative pathways belonging to term "Consistent responding": This table lists the name, category, website and TVPC patterns for "Consistent responding" pathways. Table S4. Illustrative pathways belonging to term "Tumor specific responding": This table lists the name, category, website and TVPC patterns for "Tumor specific responding" pathways. Table S5. Illustrative pathways belonging to term "Normal specific responding": This table lists the name, category, web site and TVPC patterns for "Normal specific responding" pathways. Table S6. Illustrative pathways belonging to term "Divergent responding": This table lists the name, category, website and TVPC patterns for "Divergent responding" pathways. Table S7. Genes within profile #0 for normal samples: This table contains all genes within profile #0 for normal samples, and lists the normalized expression data to the right of gene symbol. Table S8. Genes within profile #2 for normal samples: This table contains all genes within profile #2 for normal samples, and lists the normalized expression data to the right of gene symbol. Table S9. Genes within profile #9 for normal samples: This table contains all genes within profile #9 for normal samples, and lists the normalized expression data to the right of gene symbol. Table S10. Genes within profile #12 for normal samples: This table contains all genes within profile # 12 for normal samples, and lists the normalized expression data to the right of gene symbol. Table S11. Genes within profile #14 for normal samples: This table contains all genes within profile #14 for normal samples, and lists the normalized expression data to the right of gene symbol. Ta [file 867289.f1.zip › 867289.f1/Table S19.xls]

## Sheet: Sheet1
GO Results for Intersection of (row) Profile 2 with (column) Profile 9 based on the actual number of genes in the intersection (0.0,1.0,0.0,-2.0)
-------
Category ID	Category Name	#Genes Category	#Genes Assigned	#Genes Expected	#Genes Enriched	p-value	Corrected p-value	Fold
GO:0044422	organelle part	6139	40	17.6	22.4	1.8e-09	<0.001	2.3
GO:0007051	spindle organization	91	7	0.3	6.7	7.3e-09	<0.001	26.9
GO:0051301	cell division	707	14	2	12	8.8e-09	<0.001	6.9
GO:0000280	nuclear division	489	12	1.4	10.6	1.1e-08	<0.001	8.6
GO:0044446	intracellular organelle part	5978	38	17.1	20.9	1.8e-08	<0.001	2.2
GO:0048285	organelle fission	518	12	1.5	10.5	2.1e-08	<0.001	8.1
GO:0007067	mitosis	360	10	1	9	6.9e-08	<0.001	9.7
GO:0043233	organelle lumen	2562	23	7.3	15.7	2.2e-07	<0.001	3.1
GO:0005737	cytoplasm	8587	44	24.6	19.4	2.9e-07	<0.001	1.8
GO:0022402	cell cycle process	1130	15	3.2	11.8	4.5e-07	<0.001	4.6
GO:0000793	condensed chromosome	171	7	0.5	6.5	5.7e-07	0.002	14.3
GO:0000278	mitotic cell cycle	869	13	2.5	10.5	8.2e-07	0.004	5.2
GO:0000226	microtubule cytoskeleton organization	310	8	0.9	7.1	2.7e-06	0.004	9
GO:0070013	intracellular organelle lumen	2504	21	7.2	13.8	2.8e-06	0.006	2.9
GO:0007049	cell cycle	1493	16	4.3	11.7	3e-06	0.006	3.7
GO:0000777	condensed chromosome kinetochore	82	5	0.2	4.8	3.7e-06	0.006	21.3
GO:0005515	protein binding	7922	40	22.7	17.3	4.6e-06	0.008	1.8
GO:0000775	chromosome, centromeric region	153	6	0.4	5.6	4.9e-06	0.008	13.7
GO:0044430	cytoskeletal part	1192	14	3.4	10.6	5e-06	0.008	4.1
GO:0000779	condensed chromosome, centromeric region	87	5	0.2	4.8	5e-06	0.008	20.1
GO:0007010	cytoskeleton organization	866	12	2.5	9.5	5.1e-06	0.008	4.8
GO:0044424	intracellular part	11386	49	32.6	16.4	6.2e-06	0.008	1.5
GO:0005856	cytoskeleton	1582	16	4.5	11.5	6.2e-06	0.008	3.5
GO:0043228	non-membrane-bounded organelle	2878	22	8.2	13.8	6.9e-06	0.008	2.7
GO:0043232	intracellular non-membrane-bounded organelle	2878	22	8.2	13.8	6.9e-06	0.008	2.7
GO:0007017	microtubule-based process	479	9	1.4	7.6	8.2e-06	0.01	6.6
GO:0005622	intracellular	11505	49	32.9	16.1	9.1e-06	0.01	1.5
GO:0044428	nuclear part	2271	19	6.5	12.5	1.1e-05	0.012	2.9
GO:0015630	microtubule cytoskeleton	788	11	2.3	8.7	1.2e-05	0.012	4.9
GO:0000776	kinetochore	106	5	0.3	4.7	1.3e-05	0.012	16.5
GO:0007088	regulation of mitosis	111	5	0.3	4.7	1.6e-05	0.014	15.7
GO:0043229	intracellular organelle	9792	44	28	16	2.1e-05	0.016	1.6
GO:0000166	nucleotide binding	2197	18	6.3	11.7	2.6e-05	0.02	2.9
GO:1901265	nucleoside phosphate binding	2198	18	6.3	11.7	2.6e-05	0.02	2.9
GO:0044763	single-organism cellular process	10243	45	29.3	15.7	2.6e-05	0.02	1.5
GO:0044464	cell part	13204	52	37.8	14.2	3e-05	0.022	1.4
GO:0036094	small molecule binding	2453	19	7	12	3.2e-05	0.022	2.7
GO:0043227	membrane-bounded organelle	9610	43	27.5	15.5	3.8e-05	0.024	1.6
GO:0051783	regulation of nuclear division	136	5	0.4	4.6	4.4e-05	0.024	12.8
GO:0051726	regulation of cell cycle	758	10	2.2	7.8	5.2e-05	0.026	4.6
GO:0031981	nuclear lumen	1903	16	5.4	10.6	6.2e-05	0.028	2.9
GO:0007346	regulation of mitotic cell cycle	355	7	1	6	6.7e-05	0.03	6.9
GO:0043170	macromolecule metabolic process	7105	35	20.3	14.7	8.2e-05	0.036	1.7
GO:0007059	chromosome segregation	156	5	0.4	4.6	8.4e-05	0.038	11.2
GO:0042060	wound healing	651	9	1.9	7.1	9.1e-05	0.04	4.8
GO:0005819	spindle	258	6	0.7	5.3	9.4e-05	0.042	8.1
GO Results for Intersection of (row) Profile 5 with (column) Profile 12 based on the actual number of genes in the intersection (0.0,1.0,2.0,3.0)
-------
Category ID	Category Name	#Genes Category	#Genes Assigned	#Genes Expected	#Genes Enriched	p-value	Corrected p-value	Fold
GO:0005739	mitochondrion	1396	24	9.1	14.9	1.2e-05	<0.001	2.6
